# Supplementary material for: SAM homeostasis is regulated by CFIm-mediated splicing of MAT2A
Source: bioRxiv preprint, doi:10.1101/2020.11.12.380626, version 1 (2020-11-12)
Supplement: Table S1 [file 380626_file16.xlsx]

## Sheet: Description
CRISPR screen results from three biological replicates analyzed by MAGeCK individually and as a triplicate.
Columns color coded by analysis type (blue shades for analysis of individual replicates by MAGeCK and yellow for analysis of all three replicates together as a triplicate).
The -log(FDR) of the triplicate was calculated then used to plot genes in Figure 1G.
color coding of analysis
	rep1	rep2	rep3	triplicate
column abbreviations
	num	number of sgRNA found in the Brunello Library
	score	Significance score of the gene
	p-value	p-value of the gene
	fdr	False discovery rate for the gene
	rank	Ranking of gene significance (1 = most likely to be significant enrichment in sample)
	goodsgrna	Number of sgRNAs found a significant number of times in the CRISPR screen input (most genes have 4 possible sgRNAs)
	lfc	log fold changes

## Sheet: Pos Enrichment
		rep1	rep1	rep1	rep1	rep1	rep1	rep1	rep2	rep2	rep2	rep2	rep2	rep2	rep2	rep3	rep3	rep3	rep3	rep3	rep3	rep3	triplicate	triplicate	triplicate	triplicate	triplicate	triplicate	triplicate
id	Chromosome	num	score	p-value	fdr	rank	goodsgrna	lfc	num	score	p-value	fdr	rank	goodsgrna	lfc	num	score	p-value	fdr	rank	goodsgrna	lfc	num	score	p-value	fdr	rank	goodsgrna	lfc
RDH13	19	4	6.2549e-07	3.6918e-06	0.012376	6	4	2.6635	4	1.4465e-07	1.2306e-06	0.008251	2	4	3.0187	4	1.5326e-06	6.153e-06	0.024752	5	4	2.8565	4	1.6893e-12	2.4612e-07	0.000381	1	4	3.1768
CGB	19	4	5.9726e-07	3.6918e-06	0.012376	5	4	2.9668	4	2.3205e-07	1.2306e-06	0.008251	3	4	3.4489	4	1.1304e-07	7.3837e-07	0.012376	1	4	3.3971	4	1.0656e-11	2.4612e-07	0.000381	2	4	3.5458
METTL16	17	4	1.0358e-09	2.4612e-07	0.002475	1	4	4.2725	4	4.0199e-07	2.7073e-06	0.013614	4	4	3.6427	4	3.1319e-05	0.00012232	0.124887	18	3	2.738	4	1.0977e-11	2.4612e-07	0.000381	3	4	3.9514
LENG8	19	4	2.5698e-08	7.3837e-07	0.003713	3	4	3.2181	4	3.2178e-06	1.3044e-05	0.037482	7	4	2.9073	4	1.0794e-06	5.1686e-06	0.024752	4	4	2.6254	4	1.1483e-10	2.4612e-07	0.000381	4	4	3.2641
ACPT	19	4	3.7026e-08	7.3837e-07	0.003713	4	4	3.1295	4	0.00032546	0.0011806	0.395792	59	4	2.4926	4	0.00019532	0.00071794	0.328195	44	4	1.9417	4	1.8298e-09	2.4612e-07	0.000381	5	4	2.9343
MEGF8	19	4	8.9974e-06	3.2242e-05	0.054043	12	4	2.4992	4	1.8415e-05	7.359e-05	0.122834	12	4	2.5515	4	1.4779e-05	5.3901e-05	0.093131	11	4	2.2729	4	1.9836e-09	2.4612e-07	0.000381	6	4	2.8817
B3GNT8	19	4	1.2978e-06	5.6608e-06	0.014233	8	4	3.2188	4	0.00012025	0.0004477	0.281405	31	4	2.2547	4	0.00077073	0.0027888	0.51561	107	4	1.9724	4	3.1647e-09	2.4612e-07	0.000381	7	4	2.8579
CDC42EP5	19	4	0.00013378	0.00049594	0.236588	40	3	2.8403	4	4.0021e-05	0.00015432	0.155198	20	4	2.6044	4	0.00046034	0.0016754	0.392874	85	3	2.3787	4	7.9952e-09	2.4612e-07	0.000381	8	4	3.1763
CBLC	19	4	3.6404e-05	0.00013857	0.126688	22	4	2.6593	4	0.00017798	0.00065936	0.332054	38	4	2.4721	4	3.5433e-05	0.0001366	0.124887	22	4	2.1741	4	1.1124e-08	2.4612e-07	0.000381	9	4	2.7659
LRRC4B	19	4	2.486e-05	0.00010165	0.113586	18	4	2.7977	4	0.00026077	0.00094929	0.359406	50	4	2.311	4	0.001462	0.0052658	0.62466	167	4	2.0003	4	1.3374e-08	2.4612e-07	0.000381	10	4	2.556
BCL2L12	19	4	0.0001356	0.0005048	0.236588	42	4	2.7987	4	0.00017551	0.00064952	0.332054	37	4	2.6313	4	0.0060901	0.021043	0.962338	432	4	1.8696	4	1.3845e-08	2.4612e-07	0.000381	11	4	2.6692
FLT3LG	19	4	0.0044954	0.015683	0.80309	391	4	2.1953	4	2.5913e-05	0.0001046	0.123762	17	4	2.6014	4	0.0054965	0.019044	0.925218	408	3	1.8977	4	2.1065e-08	2.4612e-07	0.000381	12	4	2.6477
LENG9	19	4	0.00024238	0.0008853	0.273953	65	3	2.8116	4	9.4405e-08	7.3837e-07	0.008251	1	4	3.0434	4	7.7217e-07	4.1841e-06	0.024752	3	4	3.369	4	2.144e-08	2.4612e-07	0.000381	13	4	3.2445
NLRP2	19	4	0.00018669	0.00069037	0.262003	53	4	2.3744	4	2.3462e-05	9.328e-05	0.122834	14	4	2.5626	4	1.8653e-05	7.4083e-05	0.093131	16	4	2.4765	4	3.1171e-08	7.3837e-07	0.000874	14	4	2.9653
SHKBP1	19	4	0.0011018	0.0039859	0.542063	146	4	2.2113	4	0.018295	0.058791	1	1056	4	1.7858	4	0.00056625	0.0020736	0.448472	93	4	1.5701	4	9.7581e-08	7.3837e-07	0.000874	15	4	2.1905
IL4I1	19	4	0.0025835	0.0091757	0.680729	269	3	1.8426	4	2.2975e-05	9.0819e-05	0.122834	13	3	3.2815	4	6.9592e-06	2.3382e-05	0.058787	8	4	2.5211	4	1.0994e-07	7.3837e-07	0.000874	16	3	2.8936
LENG1	19	4	5.022e-05	0.00019321	0.149467	26	3	2.6691	4	1.0149e-06	5.1686e-06	0.017327	6	3	3.2043	4	6.8011e-05	0.00026163	0.164449	32	3	2.7511	4	1.1437e-07	7.3837e-07	0.000874	17	3	3.2011
URI1	19	4	1.4681e-05	5.3408e-05	0.076733	14	4	2.7852	4	0.0036466	0.012803	0.87892	287	2	1.6093	4	0.00073033	0.0026505	0.51561	102	3	1.8288	4	1.3658e-07	1.2306e-06	0.001125	18	3	2.549
PAF1	19	4	0.00015656	0.00058109	0.25409	46	3	2.4581	4	9.1696e-07	4.6763e-06	0.017327	5	3	3.3158	4	0.033245	0.094712	1	1718	3	1.4067	4	1.7006e-07	1.2306e-06	0.001125	19	3	2.9231
KLK8	19	4	0.0029979	0.010611	0.709708	300	4	1.783	4	0.00033583	0.0012181	0.401639	60	4	2.4611	4	0.056876	0.14008	1	2585	3	1.1724	4	1.8794e-07	1.2306e-06	0.001125	20	4	2.1056
KIRREL2	19	4	0.0076596	0.026113	0.877715	595	3	1.7178	4	8.2586e-05	0.00031774	0.244165	26	4	2.2521	4	0.026063	0.080362	1	1436	3	1.3825	4	2.0951e-07	1.2306e-06	0.001125	21	4	2.0961
GP6	19	4	0.0016063	0.0057497	0.572517	202	3	1.8157	4	0.0045906	0.016009	0.923749	342	3	2.0116	4	1.8287e-05	7.3098e-05	0.093131	15	3	2.5104	4	2.7488e-07	1.2306e-06	0.001125	22	3	2.4432
KLK10	19	4	0.00059141	0.0021666	0.423099	103	3	2.1259	4	0.0049563	0.017269	0.94389	363	4	1.9724	4	0.0014287	0.005155	0.62466	165	4	1.9612	4	3.1485e-07	1.7229e-06	0.001507	23	4	2.0471
GGN	19	4	0.00032849	0.0011905	0.320239	74	3	2.2952	4	0.017813	0.057388	1	1041	3	1.8775	4	0.0029325	0.010371	0.81145	251	4	1.5164	4	3.6333e-07	2.2151e-06	0.001856	24	3	2.337
VN1R4	19	4	6.8489e-05	0.00026409	0.196736	27	3	2.8051	4	0.00014103	0.0005235	0.315842	32	4	2.4365	4	0.01026	0.034381	1	677	3	1.4703	4	4.1742e-07	2.7073e-06	0.002094	25	4	2.6254
CGB8	19	4	0.00053482	0.0019461	0.412038	95	3	2.3817	4	0.00014834	0.00054713	0.315842	33	4	2.6524	4	0.00078207	0.0028302	0.51561	110	4	1.6245	4	4.2736e-07	2.7073e-06	0.002094	26	4	2.3037
SPHK2	19	4	0.0028914	0.01022	0.709708	289	4	1.7356	4	6.5188e-05	0.00025277	0.225545	22	4	2.605	4	0.0091693	0.030985	1	607	4	1.7477	4	4.9625e-07	3.1996e-06	0.002384	27	4	2.3901
LIN37	19	4	0.00024893	0.00090942	0.277153	66	4	2.2747	4	0.0038312	0.013444	0.883265	299	4	2.1604	4	0.0091762	0.031003	1	609	3	1.5216	4	5.9772e-07	3.6918e-06	0.002652	28	4	2.3159
NUDT19	19	4	3.8969e-05	0.00015136	0.130157	23	4	2.4411	4	0.00024566	0.00089908	0.359406	49	3	2.6478	4	0.0039431	0.013821	0.84983	320	3	1.7885	4	8.2356e-07	4.6763e-06	0.003243	29	4	2.7138
CNFN	19	4	0.00014385	0.00053581	0.242354	44	4	2.5845	4	0.0023981	0.0085525	0.761171	223	4	2.0228	4	0.0027078	0.0095823	0.809638	236	4	1.5096	4	9.7681e-07	5.1686e-06	0.003249	30	4	2.4266
PRMT1	19	4	0.00014698	0.00054221	0.242354	45	4	2.5067	4	0.00035546	0.0012889	0.408493	62	4	2.2368	4	0.0071699	0.024543	0.97617	497	3	1.1648	4	1.0733e-06	5.1686e-06	0.003249	31	4	2.2798
TRAPPC6A	19	4	0.0010437	0.0037792	0.531849	142	3	2.0604	4	0.0051343	0.017841	0.944028	375	4	2.006	4	0.0010313	0.0037246	0.606993	122	3	1.8908	4	1.0799e-06	5.1686e-06	0.003249	32	3	2.4511
ISOC2	19	4	0.00064139	0.0023404	0.440957	106	4	2.0321	4	0.00066943	0.0024477	0.524895	88	3	2.6443	4	0.020459	0.065181	1	1184	3	1.3888	4	1.2921e-06	5.6608e-06	0.00345	33	4	1.9989
FOSB	19	4	0.00022668	0.00082672	0.273576	60	3	2.6616	4	0.16436	0.32494	1	5564	2	1.0451	4	0.0013579	0.0049	0.623233	156	3	1.9247	4	1.5478e-06	6.6453e-06	0.003613	34	3	2.2891
ALDH16A1	19	4	0.00013546	0.00050406	0.236588	41	4	2.6825	4	0.00043238	0.001569	0.432321	72	2	1.956	4	2.973e-05	0.0001174	0.124887	17	4	2.4903	4	1.5743e-06	6.6453e-06	0.003613	35	4	2.7438
TNNT1	19	4	1.9915e-05	7.999e-05	0.099884	16	3	2.6357	4	0.0075506	0.02575	0.990336	520	3	1.6807	4	8.5937e-06	3.0273e-05	0.067657	9	3	2.646	4	1.5802e-06	6.6453e-06	0.003613	36	3	2.6505
TSKS	19	4	0.00017653	0.00065296	0.262003	49	3	2.3016	4	0.0011072	0.0039997	0.581986	137	3	2.2357	4	0.026122	0.080476	1	1439	3	1.4589	4	1.6516e-06	6.6453e-06	0.003613	37	4	2.3638
AP2A1	19	4	0.001438	0.005186	0.561376	184	4	2.2647	4	0.0013389	0.004836	0.618874	155	4	1.7802	4	0.024073	0.075619	1	1360	4	1.2533	4	1.7063e-06	7.1375e-06	0.003681	38	4	1.9872
SYNE4	19	4	0.00042833	0.0015543	0.363516	86	4	2.1916	4	0.0018642	0.0066662	0.677193	195	4	2.2683	4	0.016644	0.053877	1	1013	3	1.4875	4	1.7088e-06	7.1375e-06	0.003681	39	4	2.4665
MED9	17	4	0.00033803	0.0012259	0.320239	77	4	1.8963	4	0.049438	0.12673	1	2231	3	1.4907	4	0.012583	0.041482	1	813	3	1.6196	4	1.8922e-06	8.122e-06	0.004084	40	3	2.049
HAUS5	19	4	0.0010351	0.0037418	0.531849	140	4	2.1148	4	0.008005	0.02725	0.997259	543	4	1.8778	4	0.010442	0.034934	1	689	2	0.78921	4	2.087e-06	8.6143e-06	0.004125	41	4	1.7849
SCGB2B2	19	4	0.0010214	0.0036911	0.531849	138	3	2.1721	4	0.0062242	0.021451	0.962383	441	4	1.6169	4	0.0059723	0.020645	0.957373	427	3	1.6258	4	2.2733e-06	8.6143e-06	0.004125	42	4	2.2018
TEAD2	19	4	0.0056393	0.019521	0.829423	468	4	1.8012	4	7.2497e-05	0.00028033	0.225545	25	4	2.5944	4	0.032289	0.092818	1	1684	2	1.1058	4	2.3473e-06	9.1065e-06	0.00426	43	4	2.3057
MZF1	19	4	0.031846	0.09247	1	1646	3	1.4437	4	0.026971	0.083073	1	1446	3	1.8379	4	5.1148e-05	0.00019714	0.136736	29	3	2.5038	4	3.0737e-06	1.2552e-05	0.005533	44	3	2.4056
PDCD5	19	4	0.013016	0.042824	0.993496	860	4	1.3886	4	0.00062789	0.0022921	0.524895	85	4	2.1781	4	0.002595	0.0092131	0.809638	225	3	1.6737	4	3.1183e-06	1.3044e-05	0.005533	45	4	2.0685
SUPT5H	19	4	6.3911e-06	2.1413e-05	0.039154	11	3	2.9635	4	0.0012499	0.0045289	0.613097	147	3	2.3484	4	0.0031192	0.011017	0.815532	270	4	1.989	4	3.4776e-06	1.3537e-05	0.005533	46	4	2.4408
CD33	19	4	0.022757	0.071812	1	1296	4	1.1391	4	0.0039199	0.01373	0.883265	306	4	2.0796	4	0.001108	0.0040017	0.606993	129	4	1.6979	4	3.5213e-06	1.3537e-05	0.005533	47	4	2.0599
CGB5	19	4	1.3568e-05	4.8486e-05	0.075019	13	4	2.7935	4	6.4584e-05	0.00025227	0.225545	21	4	2.929	4	6.0263e-05	0.00023406	0.151868	31	3	3.019	4	3.6745e-06	1.3537e-05	0.005533	48	4	2.9901
ZNF541	19	4	0.00047029	0.0017137	0.383003	90	4	1.9215	4	0.011827	0.039184	1	750	4	1.2425	4	0.061878	0.14945	1	2722	3	1.3088	4	3.7466e-06	1.3537e-05	0.005533	49	4	1.8408
NUDT21	16	4	6.6708e-09	2.4612e-07	0.002475	2	4	4.0476	4	0.00015912	0.00058749	0.328245	35	2	1.6312	4	0.00028501	0.0010433	0.34237	60	3	1.6466	4	4.0304e-06	1.4029e-05	0.005533	50	3	2.7701
ZNF581	19	4	0.0048484	0.016886	0.813835	416	2	1.7733	4	0.0018202	0.0065082	0.672277	191	4	2.5035	4	1.9398e-07	1.2306e-06	0.012376	2	4	3.262	4	4.0906e-06	1.4029e-05	0.005533	51	4	2.882
SDHAF1	19	4	0.000121	0.00045262	0.236588	37	4	1.8552	4	0.004346	0.015178	0.902956	331	3	1.985	4	0.026144	0.080521	1	1440	2	1.0623	4	4.5542e-06	1.5506e-05	0.005885	52	4	1.9407
EPS8L1	19	4	0.0017371	0.0062227	0.582155	215	4	2.3147	4	0.0053136	0.018419	0.952366	384	3	1.4801	4	0.00044526	0.0016099	0.390135	83	3	2.1874	4	4.6122e-06	1.5506e-05	0.005885	53	3	2.3586
INAFM1	19	4	0.0014286	0.0051545	0.561376	182	3	2.1737	4	0.0050161	0.017444	0.944028	366	4	1.8651	4	0.029842	0.087965	1	1589	3	1.0155	4	4.7791e-06	1.649e-05	0.006142	54	4	1.963
UPK1A	19	4	0.00093963	0.0033903	0.531849	128	4	2.1427	4	0.00261	0.0092579	0.77315	235	4	1.7158	4	0.02264	0.071467	1	1290	3	1.4018	4	5.2522e-06	1.8459e-05	0.006751	55	4	2.1921
APOC1	19	4	0.030557	0.089925	1	1594	3	1.6031	4	0.00020579	0.00075436	0.359406	41	4	2.6365	4	0.00068504	0.0025018	0.508301	99	4	1.799	4	5.7378e-06	1.9444e-05	0.006861	56	4	2.2809
TTYH1	19	4	0.0013319	0.0048149	0.559807	173	2	0.4883	4	0.0024484	0.0087341	0.762998	226	3	2.0626	4	0.0015422	0.0055488	0.639131	173	3	2.0272	4	5.7555e-06	1.9444e-05	0.006861	57	3	1.8472
OVOL3	19	4	0.03004	0.08891	1	1573	3	1.4102	4	0.014979	0.048821	1	904	3	1.7708	4	0.079704	0.18208	1	3275	3	1.2077	4	6.1584e-06	2.092e-05	0.007132	58	4	1.9667
FXYD5	19	4	0.038632	0.10583	1	1880	3	1.5777	4	0.00023687	0.00086315	0.359406	47	3	2.662	4	0.012248	0.040436	1	797	4	1.7733	4	6.228e-06	2.092e-05	0.007132	59	4	2.1495
HSPBP1	19	4	0.095802	0.21082	1	3712	2	1.0932	4	0.0044647	0.015574	0.910618	339	4	2.2371	4	0.00051681	0.0018831	0.430412	88	4	1.7226	4	6.4504e-06	2.1413e-05	0.007178	60	4	2.0139
KLK4	19	4	0.0074591	0.025464	0.87352	583	3	1.7913	4	0.19617	0.36535	1	6303	2	0.98358	4	0.00023037	0.00084149	0.329494	51	4	1.8513	4	6.9057e-06	2.2889e-05	0.007547	61	4	1.9399
RPS19	19	4	0.0012566	0.0045486	0.555566	163	3	2.4132	4	0.011035	0.036777	1	700	3	1.7686	4	0.080753	0.18398	1	3304	3	1.5023	4	7.5689e-06	2.5351e-05	0.008224	62	3	2.5141
ZNF628	19	4	0.00085574	0.0030896	0.505232	123	4	1.8847	4	0.003725	0.013065	0.87892	294	4	1.9088	4	0.001393	0.0050157	0.62466	160	3	1.8726	4	7.6994e-06	2.5843e-05	0.008251	63	4	2.1838
CEACAM8	19	4	0.0072939	0.024932	0.867933	575	4	1.4596	4	0.0020389	0.0072943	0.715697	202	4	2.2982	4	0.00089413	0.0032367	0.571087	114	4	2.0629	4	7.92e-06	2.6335e-05	0.008277	64	4	2.3147
ETFB	19	4	0.000205	0.00075289	0.273576	54	3	2.2773	4	0.00069396	0.0025319	0.524895	92	3	1.984	4	0.00042014	0.0015262	0.390135	76	3	2.1457	4	8.0406e-06	2.6827e-05	0.008302	65	3	2.2648
CXCL17	19	4	0.0016866	0.0060356	0.57699	209	4	1.9588	4	0.0015298	0.005507	0.641736	169	3	2.1461	4	0.056564	0.13949	1	2576	2	1.0272	4	8.4788e-06	3.0273e-05	0.009226	66	4	2.0147
IRF3	19	4	0.0037193	0.013048	0.756387	345	4	1.5633	4	0.0076325	0.026021	0.99504	523	3	1.7263	4	0.051403	0.12974	1	2388	2	1.0224	4	9.0246e-06	3.2734e-05	0.009827	67	4	1.6074
CLDND2	19	4	0.023396	0.073672	1	1330	3	1.4853	4	0.00018528	0.00068446	0.335788	40	4	2.2818	4	0.015701	0.051057	1	965	3	1.456	4	9.124e-06	3.3226e-05	0.009828	68	4	1.9784
FAM83E	19	4	0.005208	0.018077	0.826361	439	3	1.6817	4	0.00036858	0.0013421	0.409016	65	3	2.3788	4	0.0030053	0.010635	0.81145	262	1	0.099492	4	9.4867e-06	3.4949e-05	0.00997	69	3	1.7174
PRPF31	19	4	0.0034485	0.01212	0.740794	328	4	1.6903	4	0.0072759	0.024872	0.990336	498	3	1.892	4	8.7302e-05	0.00032956	0.194201	34	4	2.3176	4	9.6573e-06	3.5195e-05	0.00997	70	4	2.2403
RPS16	19	4	1.7702e-05	6.9652e-05	0.093399	15	4	2.618	4	0.017472	0.05636	1	1029	4	1.6175	4	0.21501	0.37988	1	6674	2	0.7747	4	9.9171e-06	3.5195e-05	0.00997	71	4	1.9297
TSEN34	19	4	0.0035137	0.012356	0.743326	333	3	2.0477	4	0.0074827	0.025538	0.990336	511	3	2.1687	4	0.00097866	0.0035326	0.595173	118	3	2.0441	4	1.042e-05	3.5688e-05	0.00997	72	4	2.7637
LOC100129083	1	4	4.1922e-05	0.00016367	0.131683	25	4	2.5736	4	0.13572	0.27873	1	4762	2	1.0995	4	0.053934	0.1346	1	2490	2	0.90716	4	1.1065e-05	3.7164e-05	0.01024	73	4	1.9686
ZNF580	19	4	0.002605	0.0092431	0.680729	272	3	2.0535	4	0.0053948	0.018693	0.959082	386	2	1.5531	4	3.3075e-05	0.00012774	0.124887	20	4	2.4518	4	1.3474e-05	4.7994e-05	0.013045	74	4	2.3452
ZNF784	19	4	0.037595	0.10378	1	1838	3	1.281	4	0.0040332	0.014131	0.884924	316	4	2.0256	4	0.023279	0.073316	1	1329	3	1.3188	4	1.3674e-05	4.8978e-05	0.013135	75	4	1.7214
C19orf81	19	4	0.0053055	0.018396	0.829423	444	3	1.9785	4	0.0029884	0.01057	0.811222	257	4	1.8805	4	0.00018243	0.00067659	0.316486	43	3	1.8228	4	1.4697e-05	5.3408e-05	0.014135	76	3	2.1812
KMT2B	19	4	0.037517	0.10362	1	1835	2	1.218	4	0.028258	0.085701	1	1500	3	1.5734	4	0.001582	0.0056778	0.639131	175	4	1.9092	4	1.621e-05	6.1284e-05	0.016009	77	4	1.9729
EMC6	17	4	0.004289	0.01499	0.792794	378	4	1.66	4	0.0080306	0.027331	0.997259	546	4	1.7164	4	9.9115e-06	3.5195e-05	0.070792	10	3	2.3669	4	1.8842e-05	7.4575e-05	0.018987	78	3	2.0985
CLEC11A	19	4	0.046779	0.12153	1	2153	3	1.3112	4	0.00021638	0.00078931	0.359406	43	4	2.1831	4	0.023914	0.075179	1	1352	4	0.87983	4	1.8931e-05	7.4575e-05	0.018987	79	3	1.8032
STRN4	19	4	2.2759e-06	8.6143e-06	0.019252	9	4	3.1821	4	9.9248e-05	0.00036451	0.252817	29	4	2.6727	4	0.0007856	0.0028454	0.51561	111	3	2.1091	4	2.1607e-05	8.5404e-05	0.02133	80	3	2.6626
CGB1	19	4	0.00033739	0.001224	0.320239	75	3	2.5517	4	4.5459e-06	1.5506e-05	0.038985	8	4	3.2532	4	4.9926e-05	0.00019271	0.136736	28	4	2.7923	4	2.1911e-05	8.5897e-05	0.02133	81	3	2.949
CYP2A13	19	4	0.00027906	0.0010148	0.291584	70	2	1.2655	4	0.00070363	0.0025693	0.524895	93	4	2.3247	4	0.0092187	0.031134	1	611	3	1.5151	4	2.2836e-05	9.0327e-05	0.022156	82	3	2.0982
LILRB5	19	4	0.0016986	0.0060814	0.57699	212	3	2.3916	4	0.066157	0.1581	1	2795	3	1.4717	4	0.048468	0.12415	1	2264	3	1.3995	4	2.3336e-05	9.2788e-05	0.022486	83	4	2.0397
ECH1	19	4	0.0010109	0.0036527	0.531849	135	4	2.3154	4	0.00066744	0.0024403	0.524895	87	2	1.7744	4	0.042105	0.11208	1	2057	2	0.65922	4	2.4419e-05	9.8695e-05	0.023633	84	3	1.9123
LYPD5	19	4	0.0040424	0.014158	0.777107	365	4	1.6146	4	0.00060847	0.0022193	0.524895	84	4	1.8504	4	0.13412	0.27578	1	4754	2	1.0059	4	2.5274e-05	0.00010362	0.02452	85	4	1.82
BANF1	11	4	0.080935	0.18461	1	3272	3	1.2267	4	0.0027832	0.0098358	0.78477	244	4	1.6186	4	0.014428	0.047152	1	903	3	1.5294	4	2.7649e-05	0.00011248	0.026307	86	4	1.8076
CA11	19	4	0.00083952	0.003031	0.499716	122	3	2.2564	4	0.019547	0.062502	1	1119	3	1.7763	4	0.00022754	0.00082918	0.329494	49	3	2.2234	4	2.8435e-05	0.00011395	0.026346	87	4	2.1377
ZSCAN18	19	4	0.016145	0.052409	1	993	4	1.2271	4	0.069533	0.16432	1	2901	3	1.4921	4	0.012922	0.042524	1	826	4	0.88948	4	2.9297e-05	0.00011691	0.026721	88	4	1.6742
ZNF579	19	4	0.01697	0.054875	1	1038	4	1.2441	4	0.0039246	0.013752	0.883265	307	3	1.7518	4	0.01299	0.042738	1	831	4	1.211	4	3.079e-05	0.00012035	0.0272	89	4	1.7054
DNAAF3	19	4	0.03852	0.1056	1	1877	3	1.2779	4	0.00056447	0.0020667	0.519616	80	4	2.2363	4	0.023659	0.074456	1	1342	3	1.3587	4	3.1524e-05	0.00012281	0.027448	90	4	1.7598
PNMAL2	20	4	0.0017719	0.0063413	0.587786	217	4	1.9024	4	0.032591	0.094269	1	1635	3	1.5053	4	0.0028203	0.0099751	0.81145	245	3	1.9068	4	3.2822e-05	0.00012725	0.02784	91	4	1.9044
ZNF428	19	4	0.095833	0.21088	1	3716	3	1.3737	4	0.069452	0.16416	1	2899	3	1.292	4	0.0029598	0.010472	0.81145	255	4	1.809	4	3.2985e-05	0.00012774	0.02784	92	4	1.7075
SPRED3	19	4	0.0042441	0.014847	0.792794	374	4	1.6546	4	0.00614	0.0212	0.962383	435	4	1.2597	4	0.056376	0.13914	1	2572	3	1.021	4	3.3739e-05	0.00012872	0.02784	93	4	1.6201
CADM4	1	4	0.0012022	0.0043433	0.549443	159	4	2.4292	4	0.0068143	0.023375	0.974101	479	3	2.0242	4	0.010633	0.035539	1	705	3	1.5991	4	3.6156e-05	0.00013758	0.029136	94	4	2.3464
TMEM150B	19	4	0.01993	0.063591	1	1153	3	1.7423	4	0.00057443	0.0021036	0.522369	81	4	2.1614	4	0.10618	0.22872	1	3980	3	1.0518	4	3.6407e-05	0.00013857	0.029136	95	4	1.8098
EID2B	19	4	5.1907e-06	1.8459e-05	0.037129	10	4	2.2084	4	0.00026385	0.00096209	0.359406	52	3	2.3316	4	0.045546	0.1187	1	2164	2	1.1672	4	3.6501e-05	0.00013906	0.029136	96	4	2.0285
GEMIN7	19	4	0.05174	0.13081	1	2353	3	1.0699	4	0.052568	0.13263	1	2334	3	1.55	4	0.0015899	0.0057034	0.639131	176	4	1.8904	4	3.7972e-05	0.00014546	0.030162	97	3	1.7802
YIF1B	19	4	0.0094988	0.032017	0.916741	693	3	1.956	4	0.013206	0.043407	1	821	3	1.7018	4	0.02639	0.081004	1	1452	3	1.3818	4	3.8526e-05	0.00014841	0.030461	98	4	1.9629
IRF2BP1	19	4	0.022465	0.070942	1	1276	2	0.18879	4	0.053048	0.13357	1	2351	3	1.5867	4	1.6394e-05	6.2269e-05	0.093131	12	3	2.4947	4	3.9396e-05	0.00015235	0.030953	99	2	1.6171
AP2S1	19	4	0.018476	0.059311	1	1096	2	1.2791	4	0.0010198	0.0036862	0.569005	129	4	1.8901	4	0.011613	0.038546	1	755	4	1.1373	4	4.4042e-05	0.00016859	0.033828	100	4	1.6967
ACTN4	19	4	9.6168e-05	0.00035466	0.210325	33	4	2.6658	4	0.0059878	0.020696	0.962383	426	4	1.7984	4	0.16961	0.33321	1	5745	3	0.8016	4	4.4485e-05	0.00017105	0.033828	101	4	2.2509
SPNS2	17	4	0.0065188	0.022424	0.856389	523	4	1.9862	4	0.023376	0.073611	1	1304	3	1.7337	4	0.013848	0.045383	1	870	3	1.771	4	4.4643e-05	0.00017155	0.033828	102	3	2.072
ROM1	11	4	0.0098613	0.033157	0.917399	722	4	1.4457	4	0.13444	0.27657	1	4722	3	1.0075	4	0.0095563	0.032208	1	630	4	1.1268	4	4.5739e-05	0.00017401	0.033981	103	4	1.6051
ARHGAP35	19	4	0.0086385	0.029308	0.907662	640	3	1.6962	4	2.4023e-05	9.771e-05	0.122834	16	3	2.8642	4	0.0038898	0.013627	0.84983	312	3	1.1712	4	4.7136e-05	0.00018287	0.035125	104	3	2.1587
COX6B2	19	4	0.052249	0.13177	1	2367	3	1.1336	4	0.017359	0.056028	1	1021	3	1.1499	4	0.0014749	0.0053106	0.62466	170	4	1.7534	4	4.73e-05	0.00018336	0.035125	105	4	1.5575
CEACAM20	19	4	0.0028196	0.0099716	0.709263	282	3	1.7044	4	0.0013517	0.0048749	0.618874	157	2	0.78005	4	0.13186	0.27205	1	4693	2	0.30603	4	4.8037e-05	0.00018631	0.035354	106	3	1.5057
GIPR	19	4	0.00058093	0.0021302	0.423099	100	3	2.4035	4	0.019389	0.062022	1	1110	3	1.7571	4	0.00074294	0.0026923	0.51561	103	3	2.0492	4	4.9045e-05	0.00019025	0.035743	107	3	2.1055
ZNF473	19	4	0.0018283	0.0065372	0.592298	222	3	1.6989	4	0.14254	0.2899	1	4976	3	1.0759	4	0.0098322	0.033062	1	652	4	1.3182	4	4.9721e-05	0.00019222	0.035743	108	3	1.67
ERCC2	19	4	0.013231	0.043482	0.996225	870	4	1.2116	4	0.0020943	0.0074976	0.722985	205	4	2.2085	4	0.00021371	0.00078094	0.329494	46	3	2.3163	4	5.0232e-05	0.0001937	0.035743	109	4	2.1694
SIGLEC10	19	4	0.0013983	0.0050349	0.561376	178	2	1.2165	4	0.010076	0.033812	1	647	3	1.695	4	0.00021184	0.00077553	0.329494	45	3	2.2341	4	5.3552e-05	0.00020551	0.037579	110	3	2.3381
C19orf40	19	4	0.0016859	0.0060332	0.57699	208	4	2.0156	4	0.0016089	0.0057615	0.647409	177	3	1.8983	4	0.1047	0.22607	1	3940	3	1.1748	4	5.6446e-05	0.00021782	0.03947	111	4	2.0569
FTL	19	4	8.8888e-05	0.0003335	0.210325	31	3	2.6214	4	0.03309	0.095242	1	1650	3	1.5244	4	0.14667	0.29643	1	5105	3	1.0094	4	5.8034e-05	0.00022815	0.040974	112	4	2.1964
RPS5	19	4	0.013801	0.045243	1	899	3	1.575	4	0.0043594	0.015222	0.902956	333	3	2.1019	4	0.059387	0.14479	1	2656	3	1.3842	4	5.8881e-05	0.00023308	0.041211	113	4	1.7958
ZNF324	19	4	0.00012576	0.00046542	0.236588	38	4	2.2123	4	0.10511	0.2272	1	3924	2	1.0331	4	0.018018	0.05799	1	1069	4	1.0395	4	5.9457e-05	0.00023357	0.041211	114	4	1.7587
FBXW9	19	4	0.13871	0.28362	1	4859	2	1.1114	4	0.0013787	0.0049709	0.624907	159	4	2.3035	4	0.25178	0.41402	1	7352	2	0.31326	4	6.132e-05	0.00023849	0.041713	115	4	1.463
NLRP4	19	4	0.001791	0.0064147	0.589154	219	3	2.174	4	0.016709	0.05408	1	995	2	1.3351	4	0.0068666	0.023539	0.97617	478	4	1.5179	4	6.8529e-05	0.00026409	0.045792	116	4	1.9662
BBC3	19	4	0.0023464	0.0083669	0.665793	251	2	1.1174	4	0.0017653	0.0063231	0.672277	185	3	2.0836	4	0.0027631	0.0097634	0.809638	239	4	1.7391	4	6.9866e-05	0.00027098	0.046585	117	3	1.6753
KLK6	19	4	0.00021282	0.00077799	0.273576	56	4	2.4284	4	0.018602	0.059662	1	1082	3	1.8878	4	0.0070439	0.024122	0.97617	489	2	0.83487	4	7.2057e-05	0.00027787	0.047365	118	3	1.8535
PPP5D1	19	4	0.00022309	0.00080851	0.273576	58	4	2.2427	4	0.00044205	0.0016005	0.435041	74	3	2.1364	4	0.00015638	0.00058109	0.27876	41	2	0.7827	4	7.654e-05	0.00029805	0.049628	119	4	1.8437
HSD17B14	19	4	0.013648	0.044752	1	890	3	1.2211	4	0.010738	0.035887	1	688	4	1.7074	4	0.00087142	0.0031516	0.560983	113	4	1.4851	4	7.7143e-05	0.00029855	0.049628	120	4	1.7719
SNRPD2	19	4	0.0029568	0.010458	0.709708	295	4	1.7109	4	0.0028883	0.010209	0.795042	252	3	2.1595	4	0.0029641	0.010488	0.81145	256	4	2.2105	4	7.7207e-05	0.00029855	0.049628	121	4	2.1043
PSMA5	1	4	0.08627	0.19402	1	3433	3	1.3693	4	0.31987	0.47969	1	8751	2	0.83799	4	3.4349e-05	0.00013168	0.124887	21	4	2.0755	4	8.0037e-05	0.00030691	0.050601	122	4	1.7215
SBK3	19	4	0.003659	0.012844	0.753211	342	3	2.0449	4	0.016677	0.053983	1	990	3	1.8889	4	0.02606	0.080353	1	1435	2	0.96256	4	8.1262e-05	0.00031233	0.051075	123	4	1.7139
CPT1C	19	4	0.0038763	0.013588	0.769795	353	3	1.9601	4	0.028223	0.085626	1	1497	3	1.7662	4	0.10248	0.22224	1	3886	3	1.0949	4	8.1744e-05	0.00031528	0.051142	124	3	2.0989
KLC3	19	4	0.00075814	0.0027445	0.473875	115	4	2.4555	4	0.011955	0.039592	1	757	4	1.7114	4	0.015147	0.049333	1	937	3	1.7763	4	8.2905e-05	0.00031873	0.051287	125	4	2.1468
ZNF565	19	4	0.025669	0.080103	1	1424	2	1.0297	4	8.7424e-05	0.00033005	0.244165	27	4	2.809	4	0.012205	0.040316	1	793	3	1.5208	4	8.6161e-05	0.00032808	0.052195	126	3	2.4379
KLK14	19	4	0.0096097	0.03236	0.916741	706	4	2.1922	4	0.0014359	0.0051787	0.636079	161	3	2.3362	4	0.0013544	0.0048882	0.623233	154	2	0.65281	4	8.7118e-05	0.00032956	0.052195	127	2	1.1779
SYNGR4	19	4	0.024263	0.076153	1	1364	3	1.6529	4	0.048142	0.12429	1	2190	3	1.5606	4	0.0028848	0.0102	0.81145	249	3	1.7376	4	8.8336e-05	0.000333	0.052328	128	3	1.9805
THOC2	X	4	0.00027385	0.00099556	0.291584	68	4	2.4227	4	0.4214	0.57427	1	10435	2	0.73429	4	0.0047111	0.016422	0.876185	371	4	1.5484	4	9.173e-05	0.00034088	0.053151	129	4	1.9017
HAMP	19	4	0.001089	0.0039352	0.542063	145	3	2.2304	4	0.0025054	0.0089118	0.771236	228	4	2.1834	4	0.032524	0.093289	1	1694	3	1.6486	4	9.6454e-05	0.00035466	0.054874	130	3	2.519
DPF1	19	4	0.001803	0.0064526	0.589941	220	3	2.467	4	0.0048329	0.016833	0.930163	359	4	2.2691	4	9.0726e-05	0.00033793	0.194201	35	4	2.5389	4	9.8286e-05	0.00036254	0.055665	131	4	2.4223
TRIM28	19	4	0.0036495	0.012812	0.753211	341	4	1.9964	4	0.0055386	0.019172	0.959082	396	4	2.1004	4	0.0025395	0.0090246	0.806755	224	2	1.6522	4	0.00010371	0.00037534	0.057193	132	3	2.3272
IGFL3	19	4	0.028891	0.086653	1	1524	3	1.6434	4	0.010188	0.034148	1	657	3	1.8586	4	0.015705	0.051074	1	966	2	1.0038	4	0.00010559	0.0003837	0.058029	133	3	1.658
GNG8	19	4	0.0091748	0.030999	0.914252	678	3	1.9034	4	0.013963	0.045714	1	857	3	1.575	4	0.017897	0.057631	1	1059	2	-0.20554	4	0.00010693	0.00038715	0.058113	134	2	0.28909
DKKL1	19	4	0.01813	0.058308	1	1082	3	1.5506	4	0.00028585	0.0010463	0.364203	56	3	2.4497	4	0.028207	0.084727	1	1527	3	1.3389	4	0.00010848	0.00039256	0.058132	135	3	1.9795
TNFRSF13B	17	4	0.0038795	0.0136	0.769795	354	4	2.1175	4	0.0057043	0.019766	0.962383	405	3	1.6683	4	0.013957	0.045703	1	879	4	1.4305	4	0.00010876	0.00039306	0.058132	136	3	1.9989
CGB7	19	4	0.012547	0.041368	0.980041	842	3	1.4647	4	0.0047637	0.016606	0.924908	356	2	-1.2923	4	5.4943e-06	1.8951e-05	0.054455	7	3	2.7995	4	0.00011237	0.0004093	0.060093	137	2	-0.45794
CEACAM18	19	4	0.024131	0.07578	1	1362	3	1.6849	4	0.0052059	0.018072	0.945621	379	4	1.9726	4	0.024353	0.076395	1	1374	4	1.1757	4	0.00011604	0.00042997	0.06267	138	4	1.9778
IRGQ	19	4	0.001646	0.0058949	0.57699	204	3	1.8961	4	0.0046999	0.016384	0.923749	351	4	1.8344	4	0.10095	0.21962	1	3841	3	1.0616	4	0.00012317	0.00045754	0.066208	139	4	1.8452
RPS11	19	4	0.0038222	0.013413	0.768653	350	3	2.117	4	0.00021254	0.00077651	0.359406	42	4	2.532	4	0.054299	0.13528	1	2501	3	1.2597	4	0.00012729	0.00046837	0.067291	140	4	2.1065
PABPN1	14	4	3.4176e-05	0.0001302	0.124705	21	4	2.6518	4	0.00026255	0.00095569	0.359406	51	1	-1.9853	4	0.0033213	0.011701	0.826335	281	3	1.9472	4	0.00013333	0.00049397	0.070466	141	2	0.28706
ALKBH6	19	4	0.0022996	0.0082094	0.660495	250	4	1.6038	4	0.0051909	0.018026	0.945621	378	3	1.6847	4	0.023615	0.07432	1	1340	4	1.3759	4	0.00013481	0.00049987	0.070806	142	3	1.7884
ZNF787	19	4	0.00011315	0.00041275	0.230611	36	4	1.9079	4	0.026099	0.0813	1	1424	3	1.5334	4	0.1592	0.31659	1	5496	3	0.85408	4	0.00013629	0.00050726	0.071349	143	4	1.9066
NUCB1	19	4	0.0015426	0.0055508	0.567397	196	4	1.8626	4	0.024439	0.076637	1	1346	2	1.1887	4	0.013074	0.042997	1	836	3	1.5442	4	0.00013929	0.00051858	0.072435	144	4	1.7934
ALOXE3	17	4	0.0019013	0.0067981	0.599726	228	4	1.9558	4	0.39284	0.54738	1	10008	2	0.57698	4	0.0082452	0.028026	0.993448	558	3	1.5892	4	0.00014247	0.00052941	0.073438	145	4	1.602
CAPN12	19	4	0.0045388	0.015822	0.80309	395	4	2.1535	4	0.0044498	0.015518	0.910618	337	3	2.116	4	0.060475	0.14681	1	2693	3	1.4174	4	0.00015692	0.00058159	0.080123	146	4	2.2533
LILRA2	19	4	0.0059068	0.020447	0.837006	488	3	1.9667	4	0.024001	0.075421	1	1329	3	1.3546	4	0.01513	0.049281	1	936	4	1.4866	4	0.0001599	0.00059094	0.080858	147	4	1.8487
COL5A1	9	4	0.0057531	0.019921	0.829423	479	4	1.1524	4	0.3014	0.46254	1	8360	2	0.60505	4	0.073243	0.17042	1	3092	3	1.0549	4	0.00016358	0.00060767	0.082586	148	4	1.2736
PPP1R37	19	4	0.0012843	0.004648	0.559807	167	4	2.0441	4	0.014312	0.046803	1	872	4	1.1449	4	0.065265	0.15585	1	2833	3	1.154	4	0.00016523	0.0006126	0.082697	149	4	1.7619
TNNI3	19	4	0.0033972	0.011944	0.740144	323	3	1.7667	4	0.68801	0.7441	1	14227	1	0.36868	4	0.0054567	0.018905	0.921212	406	4	1.5464	4	0.00017055	0.00062983	0.084455	150	4	1.6791
EXOC3L2	19	4	0.017648	0.056879	1	1064	4	1.48	4	0.013434	0.044108	1	833	2	1.2635	4	0.007775	0.026494	0.987835	533	2	1.2568	4	0.00017759	0.00065739	0.087568	151	4	1.4831
KRT17	17	4	0.030534	0.089882	1	1593	2	0.65115	4	0.0087139	0.029555	1	584	4	1.4816	4	0.018611	0.059689	1	1092	3	1.6539	4	0.00017973	0.00066724	0.088295	152	4	1.4808
PUM1	1	4	0.19104	0.35943	1	6105	2	0.73932	4	0.023203	0.073085	1	1294	3	1.5668	4	0.13255	0.2732	1	4714	1	0.27003	4	0.00019396	0.000714	0.093165	153	4	1.3577
B9D1	17	4	0.027296	0.083432	1	1477	2	1.2579	4	0.11543	0.24488	1	4210	3	1.1951	4	0.0010768	0.0038954	0.606993	126	4	1.3499	4	0.00019438	0.00071597	0.093165	154	3	1.6443
GAPDHS	19	4	0.0071246	0.024389	0.867933	559	2	1.2353	4	0.012284	0.040538	1	777	2	-0.38781	4	0.00079915	0.0028932	0.519581	112	4	2.3086	4	0.00019529	0.00071794	0.093165	155	2	1.2513
ZNF576	19	4	0.019086	0.061126	1	1116	2	1.0379	4	0.011334	0.037706	1	719	3	1.7466	4	0.0044567	0.015543	0.868413	354	4	1.4425	4	0.00019893	0.00073492	0.094367	156	3	1.8107
ALG11	13	4	0.0095509	0.032189	0.916741	697	4	2.0284	4	0.013007	0.042793	1	812	3	1.5363	4	0.015374	0.050062	1	950	3	1.2594	4	0.00020095	0.00074058	0.094367	157	3	1.9618
EPN1	19	4	0.074312	0.17269	1	3068	2	0.72113	4	0.00073455	0.0026657	0.524895	101	4	2.4785	4	0.0057201	0.019817	0.940466	417	3	1.0343	4	0.00020352	0.00074895	0.094367	158	4	2.1096
ADM5	19	4	0.00024117	0.00088136	0.273953	64	3	2.4171	4	0.11746	0.24829	1	4262	3	1.1519	4	0.00037713	0.0013692	0.382494	72	3	2.1066	4	0.00020417	0.00075141	0.094367	159	3	1.8894
ITPKC	19	4	0.031102	0.091023	1	1613	2	0.89976	4	0.021393	0.067851	1	1214	3	1.5002	4	0.0013642	0.0049266	0.623233	159	3	1.9585	4	0.00020538	0.00075387	0.094367	160	3	1.4856
LLGL1	17	4	0.013355	0.043867	0.996985	878	4	1.5511	4	0.57263	0.69175	1	12728	1	0.66574	4	0.03119	0.090657	1	1643	3	1.1986	4	0.00020612	0.00075535	0.094367	161	4	1.5895
MARS	12	4	0.0044791	0.015622	0.80309	387	3	1.5943	4	8.1687e-06	2.8304e-05	0.063256	9	4	2.6309	4	0.0026741	0.0094528	0.809638	232	4	1.9704	4	0.00021471	0.0007839	0.0964	162	4	2.302
INTS6	13	4	0.0087349	0.029623	0.907662	649	3	1.8123	4	0.04856	0.12505	1	2204	3	1.3669	4	0.14287	0.29024	1	5005	3	0.84999	4	0.0002153	0.00078439	0.0964	163	4	1.7513
LILRA1	19	4	0.091502	0.20323	1	3598	3	1.1477	4	0.047992	0.12403	1	2181	2	1.2519	4	0.085328	0.19199	1	3417	2	0.41953	4	0.00021668	0.0007903	0.0964	164	4	1.3571
SIGLEC8	19	4	0.010129	0.033981	0.922013	734	3	1.5735	4	0.00083387	0.0030133	0.536362	113	4	1.7	4	0.11725	0.24763	1	4264	3	0.91506	4	0.00021696	0.00079079	0.0964	165	4	1.7048
CEP89	19	4	2.1365e-05	8.442e-05	0.099884	17	3	2.4844	4	0.012138	0.040126	1	769	3	2.052	4	0.019926	0.063578	1	1158	3	1.2645	4	0.00022194	0.00080408	0.097429	166	3	2.1035
KCNC3	19	4	0.0040397	0.01415	0.777107	364	4	1.9996	4	0.0011152	0.0040219	0.581986	138	2	1.3446	4	0.0025316	0.008995	0.806755	222	4	1.9218	4	0.0002234	0.00080999	0.097557	167	3	1.9179
LIPE	19	4	0.0057629	0.01995	0.829423	482	3	1.6757	4	0.0021525	0.007692	0.724091	210	4	2.0112	4	0.0044396	0.015488	0.867771	353	2	0.30508	4	0.0002322	0.00084887	0.101355	168	3	1.6125
SLC7A10	19	4	0.0014482	0.0052234	0.561376	187	2	1.3504	4	0.040761	0.11026	1	1921	2	1.3852	4	0.14765	0.298	1	5132	3	1.0482	4	0.00023418	0.00085577	0.101355	169	2	0.22568
MED26	19	4	0.08697	0.19524	1	3454	2	0.9075	4	0.39323	0.54775	1	10014	2	0.67035	4	0.16045	0.3186	1	5533	2	0.79093	4	0.0002346	0.00085773	0.101355	170	4	1.2264
C19orf68	19	4	0.013748	0.045069	1	895	3	1.8181	4	0.1508	0.30323	1	5201	3	1.0993	4	0.020606	0.06561	1	1196	3	1.2169	4	0.00023615	0.00086167	0.101355	171	3	1.3752
GSPT1	16	4	0.00031468	0.0011452	0.315543	73	3	1.6786	4	0.00022665	0.00082672	0.359406	45	4	2.9767	4	0.0048615	0.016937	0.891802	376	2	1.0589	4	0.00023999	0.00087546	0.102377	172	3	2.0491
RPL28	19	4	0.057908	0.14248	1	2542	3	1.4175	4	0.0036814	0.012917	0.87892	290	3	1.8509	4	0.098936	0.21609	1	3785	2	1.0912	4	0.00024408	0.00089219	0.103564	173	3	1.9275
FBXO27	19	4	0.17512	0.34184	1	5761	3	0.80287	4	0.0017797	0.0063738	0.672277	186	4	2.1118	4	0.027155	0.082574	1	1489	2	0.88864	4	0.00024581	0.00089908	0.103564	174	4	1.5608
CLIP3	19	4	0.00042533	0.0015424	0.363516	85	4	2.3072	4	0.13086	0.27058	1	4640	3	1.163	4	0.0011372	0.0041001	0.606993	135	3	2.1772	4	0.00024652	0.00090105	0.103564	175	4	1.7302
FBXO46	19	4	0.0055818	0.019319	0.829423	465	2	-1.3179	4	9.1532e-05	0.00033989	0.244165	28	3	2.6418	4	0.035661	0.099492	1	1819	3	1.35	4	0.00025961	0.00094339	0.107814	176	2	1.0227
LGI4	19	4	0.0010014	0.0036153	0.531849	134	3	1.9989	4	0.015888	0.051624	1	955	3	1.6178	4	0.0046328	0.016151	0.876185	364	3	1.9436	4	0.00027122	0.00098572	0.112015	177	3	1.739
TRPM3	9	4	0.047166	0.12224	1	2171	3	0.92513	4	0.0012328	0.0044688	0.613097	145	4	2.3732	4	0.05885	0.14378	1	2641	3	1.4549	4	0.00027257	0.0009931	0.11222	178	3	1.8305
OR4A16	11	4	0.10289	0.22319	1	3913	2	1.1125	4	0.18716	0.35699	1	6111	2	0.90683	4	0.024755	0.077543	1	1389	3	1.2508	4	0.00027836	0.0010113	0.11364	179	3	1.5548
SPATS1	6	4	0.088477	0.19795	1	3507	3	1.2082	4	0.088038	0.19735	1	3456	3	1.4335	4	0.092534	0.20478	1	3604	3	1.1548	4	0.00028075	0.0010217	0.114025	180	4	1.6818
PRX	19	4	0.0014276	0.0051511	0.561376	181	3	2.2567	4	0.0063703	0.021927	0.964579	453	3	1.9919	4	0.00043033	0.0015612	0.390135	79	4	2.541	4	0.00028198	0.0010261	0.114025	181	3	1.7765
MED25	19	4	0.0004506	0.0016355	0.373819	88	2	-0.097066	4	0.028494	0.086163	1	1511	3	1.4449	4	0.0030735	0.010853	0.813733	267	3	2.0009	4	0.00028634	0.0010502	0.116065	182	2	0.34687
PSMD8	19	4	0.0036885	0.012948	0.756387	343	4	1.8319	4	0.055124	0.1375	1	2417	2	0.95222	4	0.012229	0.040382	1	794	4	1.0698	4	0.00030093	0.0010994	0.120841	183	4	1.9594
OCSTAMP	20	4	0.34185	0.49949	1	8953	2	0.5602	4	0.0095387	0.032151	1	617	4	1.3543	4	0.12909	0.26738	1	4613	3	1.034	4	0.00030742	0.0011201	0.122444	184	4	1.0864
RPS9	19	4	0.0028028	0.0099022	0.708802	281	3	2.354	4	0.0047748	0.016646	0.924908	357	2	1.0154	4	0.031998	0.09224	1	1671	3	1.5012	4	0.00031208	0.0011359	0.122703	185	3	2.1295
BSPRY	9	4	0.24152	0.40613	1	7077	2	0.71984	4	0.30891	0.46947	1	8501	2	1.0071	4	0.11568	0.24495	1	4216	3	1.0222	4	0.00031265	0.0011383	0.122703	186	4	1.1043
SAE1	19	4	0.016321	0.052951	1	1002	4	1.5025	4	0.0083362	0.028323	1	562	3	1.8174	4	0.009034	0.030563	1	599	4	1.3245	4	0.00031309	0.0011408	0.122703	187	4	2.1296
KIAA1429	16	4	0.0024461	0.0087233	0.671073	260	3	1.7346	4	0.031417	0.091958	1	1596	3	1.3694	4	0.01014	0.034018	1	665	4	1.4849	4	0.00031943	0.0011595	0.123893	188	3	1.7816
TARM1	19	4	0.071624	0.16785	1	2977	3	1.3182	4	0.010232	0.034286	1	664	3	1.952	4	0.020896	0.066421	1	1206	3	1.3874	4	0.00032245	0.0011688	0.123893	189	3	1.7702
SELV	8	4	0.069478	0.16399	1	2908	3	1.4333	4	0.10393	0.22513	1	3896	3	1.3112	4	0.069934	0.16445	1	2986	2	0.92596	4	0.00032292	0.0011703	0.123893	190	3	1.8231
LSR	19	4	0.0024687	0.0087966	0.671073	262	3	1.8622	4	0.54799	0.68203	1	12423	1	0.6291	4	0.090892	0.20183	1	3554	3	1.008	4	0.00033296	0.0012043	0.126821	191	3	1.5783
LYPD4	19	4	0.04285	0.11404	1	2027	2	1.2591	4	0.0073509	0.025109	0.990336	500	4	1.901	4	0.013939	0.045648	1	877	4	1.4483	4	0.00033654	0.001222	0.128017	192	4	1.8655
CACNG6	19	4	0.0061611	0.021255	0.844298	503	3	1.7258	4	0.078683	0.18079	1	3171	3	1.3295	4	0.18914	0.3557	1	6192	2	0.8837	4	0.0003397	0.0012333	0.128533	193	4	1.3653
PSMB3	17	4	0.00482	0.01679	0.813835	412	3	1.9567	4	0.14907	0.30046	1	5152	2	0.9381	4	0.0023945	0.0085417	0.784507	218	3	1.6585	4	0.00034489	0.0012525	0.129297	194	3	1.3513
TUBB2B	6	4	0.096104	0.21136	1	3721	3	1.1617	4	0.61835	0.71105	1	13281	1	0.63278	4	0.020011	0.063832	1	1165	4	0.87564	4	0.00034534	0.0012535	0.129297	195	4	1.1636
PPP2R1A	19	4	0.00026357	0.0009616	0.28868	67	3	2.8033	4	0.00022277	0.00080703	0.359406	44	4	2.17	4	0.0048746	0.016985	0.891981	377	3	1.7201	4	0.00035092	0.0012722	0.130557	196	4	1.9703
PRRG2	19	4	0.049075	0.12576	1	2247	2	1.0217	4	0.012285	0.040542	1	778	3	1.9547	4	4.4719e-05	0.00017155	0.136736	25	3	2.2418	4	0.00037388	0.0013583	0.138589	197	3	2.033
SNW1	14	4	0.23187	0.39719	1	6881	2	0.71554	4	0.0042897	0.014994	0.902956	329	2	1.2239	4	0.0013611	0.0049138	0.623233	157	3	2.149	4	0.00037556	0.0013643	0.138589	198	3	1.6915
PPP1R12C	19	4	0.00040126	0.0014558	0.348715	83	2	1.8047	4	0.0019674	0.0070344	0.700446	199	4	1.9235	4	0.0074219	0.025337	0.977997	512	3	1.454	4	0.00037807	0.0013736	0.138838	199	4	2.1248
LRFN1	19	4	0.02028	0.064624	1	1169	3	1.4621	4	0.25336	0.41803	1	7372	2	0.77827	4	0.2189	0.38348	1	6736	2	0.66015	4	0.00037965	0.0013825	0.139035	200	4	1.2228
ZNF350	19	4	0.10082	0.21967	1	3857	2	-1.2341	4	0.012897	0.042436	1	807	3	1.6439	4	0.011429	0.03799	1	741	3	1.21	4	0.00038561	0.0014017	0.140264	201	2	0.29424
DOHH	19	4	0.09723	0.21338	1	3747	3	0.95615	4	0.099611	0.21769	1	3762	3	1.2714	4	0.5992	0.69902	1	12887	1	0.36669	4	0.00038799	0.0014115	0.14055	202	4	1.2189
CCDC61	19	4	0.0055216	0.019125	0.829423	456	3	1.7934	4	0.001072	0.0038772	0.577668	134	3	2.1234	4	0.070265	0.16504	1	2996	2	-1.1365	4	0.00039586	0.0014391	0.142589	203	2	-0.13495
SOX10	22	4	0.1657	0.32701	1	5534	3	0.90275	4	0.0068548	0.023504	0.974101	481	4	1.6959	4	0.010539	0.035241	1	698	3	1.624	4	0.00040359	0.0014622	0.144171	204	4	1.7487
KLK15	19	4	0.036324	0.10133	1	1798	2	0.65913	4	0.089872	0.20052	1	3511	3	1.4445	4	0.14111	0.28739	1	4950	3	0.78907	4	0.0004188	0.0015203	0.149167	205	4	1.5018
EHD2	19	4	0.027293	0.083426	1	1476	3	1.3079	4	0.095222	0.20996	1	3663	2	1.2056	4	0.013449	0.044156	1	854	4	0.88109	4	0.00043375	0.0015735	0.153561	206	3	1.4446
ZNF180	19	4	0.079172	0.18146	1	3215	2	0.42715	4	0.00030179	0.0011019	0.37565	58	4	2.2556	4	0.012038	0.039839	1	779	4	1.3499	4	0.00043552	0.0015803	0.153561	207	3	1.6571
UBE2S	19	4	0.037418	0.10344	1	1830	3	1.652	4	0.086555	0.1947	1	3408	2	1.2205	4	0.0011692	0.0042198	0.606993	138	4	1.7575	4	0.00044196	0.0016	0.154081	208	3	2.0862
AKAP10	17	4	0.0088478	0.029997	0.907662	659	3	1.7084	4	0.25776	0.42216	1	7449	2	0.93825	4	0.0039855	0.013978	0.84983	326	3	1.7637	4	0.00044232	0.001601	0.154081	209	4	1.5331
NPAS1	19	4	0.00022778	0.00082968	0.273576	61	4	2.1731	4	0.063156	0.15246	1	2700	2	-1.0427	4	0.035953	0.10008	1	1827	2	1.1908	4	0.0004462	0.0016148	0.154668	210	2	1.0934
TPR	1	4	0.029259	0.087385	1	1540	3	1.4813	4	0.067586	0.16075	1	2842	2	1.1019	4	0.00021883	0.0007962	0.329494	48	3	1.9457	4	0.00046272	0.0016822	0.160363	211	3	1.8393
PSG11	19	4	0.023799	0.074849	1	1347	4	1.3454	4	0.051875	0.13134	1	2307	3	1.4814	4	0.0010958	0.0039608	0.606993	128	3	2.1583	4	0.00046969	0.0017128	0.162187	212	4	1.4559
SHISA7	19	4	0.0031513	0.011114	0.719498	309	4	1.9849	4	0.071789	0.16837	1	2964	2	-0.21311	4	0.0013194	0.004775	0.623233	150	4	1.8499	4	0.00047249	0.0017201	0.162187	213	4	1.5401
GRIK5	19	4	1.1854e-06	5.6608e-06	0.014233	7	4	2.9653	4	0.035734	0.10047	1	1748	3	1.8096	4	0.025687	0.079597	1	1423	3	1.3405	4	0.00047389	0.0017256	0.162187	214	4	1.8258
ZNF587	19	4	0.0015122	0.0054346	0.563923	193	4	2.2582	4	0.1505	0.30276	1	5193	3	1.1107	4	0.09663	0.21199	1	3715	3	0.96053	4	0.00048228	0.0017521	0.163919	215	4	1.6642
LOC101927572	3	4	0.0046726	0.016289	0.810855	403	3	1.9846	4	0.41819	0.57125	1	10387	2	0.98997	4	0.00027631	0.0010044	0.34237	57	3	2.3901	4	0.00048662	0.0017684	0.164673	216	3	2.1456
KCTD21	11	4	0.023909	0.075163	1	1351	4	1.0002	4	0.50872	0.65616	1	11869	2	0.76033	4	0.17874	0.34609	1	5962	1	0.26935	4	0.00049237	0.0017915	0.166058	217	4	1.1998
PVRL2	2	4	0.049468	0.12651	1	2261	3	1.5526	4	0.062016	0.15035	1	2659	3	1.4471	4	0.0032638	0.011506	0.826335	279	4	1.418	4	0.00049626	0.0018028	0.166341	218	4	1.5267
NLRP9	19	4	0.078345	0.17996	1	3188	3	1.4784	4	0.0079277	0.027005	0.997259	539	3	1.7757	4	0.052066	0.13099	1	2416	2	0.82652	4	0.00049999	0.0018191	0.167074	219	3	2.0423
OR1E2	17	4	0.079592	0.18221	1	3226	3	1.1975	4	0.30561	0.46642	1	8442	2	0.94705	4	0.021573	0.068411	1	1246	2	1.1395	4	0.0005025	0.0018279	0.167124	220	4	1.3441
JOSD2	19	4	0.0027729	0.0098013	0.704084	280	4	1.6974	4	0.030174	0.089489	1	1558	1	0.63696	4	0.0091843	0.031028	1	610	2	0.97154	4	0.0005066	0.0018467	0.16807	221	3	1.4316
DNAJC17	15	4	0.011993	0.039699	0.966707	819	4	1.024	4	0.095515	0.21049	1	3670	2	0.61175	4	0.071201	0.16668	1	3032	3	1.0196	4	0.0005177	0.0018841	0.170284	222	4	1.3111
ASPDH	19	4	0.028915	0.086703	1	1527	3	1.5877	4	0.052743	0.13296	1	2341	2	0.63895	4	0.010444	0.03494	1	690	3	1.4652	4	0.00052138	0.0018954	0.170284	223	3	1.7741
EML2	19	4	0.0048833	0.017023	0.814351	418	4	1.95	4	0.01197	0.039632	1	759	2	1.4153	4	0.11816	0.24917	1	4289	3	0.94683	4	0.00052156	0.0018964	0.170284	224	4	1.7607
COX6B1	19	4	0.00016881	0.00062392	0.261448	48	4	2.7361	4	0.20625	0.37464	1	6500	2	1.0076	4	0.00029014	0.001064	0.34237	62	3	2.2702	4	0.00052433	0.0019111	0.170847	225	4	1.7498
WWC1	5	4	0.091363	0.20297	1	3594	3	1.0689	4	0.075507	0.17506	1	3063	3	1.2207	4	0.10524	0.22705	1	3955	3	1.2019	4	0.00052896	0.0019279	0.17113	226	4	1.357
ZNF544	19	4	0.011536	0.038321	0.955513	799	3	1.6872	4	0.084599	0.19122	1	3339	3	1.3898	4	0.14287	0.29023	1	5004	2	0.34428	4	0.00053026	0.0019313	0.17113	227	3	1.555
VSIG10L	19	4	0.002032	0.0072727	0.626153	232	2	1.5374	4	0.021126	0.067092	1	1197	4	1.7567	4	0.019385	0.062009	1	1129	4	1.4817	4	0.00053363	0.0019417	0.171291	228	4	1.9151
SLC1A5	19	4	0.0020791	0.007442	0.634183	236	4	1.8941	4	0.082946	0.18834	1	3292	2	0.95112	4	0.0040691	0.014248	0.85053	332	4	1.3783	4	0.00054514	0.0019855	0.174391	229	4	1.6948
GRAMD1A	19	4	0.004917	0.017126	0.814351	422	2	0.7133	4	0.047966	0.12398	1	2180	3	1.3194	4	0.047093	0.12164	1	2213	3	1.3269	4	0.00056649	0.0020736	0.181339	230	2	1.0694
SESN2	1	4	0.50725	0.65472	1	11574	2	0.68029	4	0.23741	0.40334	1	7078	2	1.0485	4	0.4096	0.56218	1	10205	2	0.51756	4	0.00057366	0.0021007	0.182911	231	4	1.181
FOXC1	6	4	0.24678	0.41096	1	7174	2	0.82273	4	0.35773	0.51478	1	9509	2	0.88885	4	0.79133	0.80371	1	15816	1	0.26203	4	0.00059429	0.002174	0.187761	232	4	1.0552
SLC22A24	11	4	0.019513	0.062393	1	1132	2	0.76478	4	0.48976	0.63843	1	11558	2	0.50459	4	0.012183	0.040247	1	790	4	1.3002	4	0.00059898	0.0021878	0.187761	233	4	1.3787
AXL	19	4	0.00055125	0.0020125	0.413063	98	3	2.1814	4	0.36021	0.5171	1	9547	2	0.82763	4	0.078079	0.17914	1	3230	2	0.95972	4	0.00059938	0.0021878	0.187761	234	4	1.5561
ZNF709	19	4	0.13493	0.27732	1	4746	3	1.1835	4	0.0030741	0.010856	0.818389	261	3	2.0047	4	0.061898	0.1495	1	2723	3	1.2081	4	0.00060075	0.0021937	0.187761	235	3	1.458
TMEM190	19	4	0.18571	0.35449	1	6008	2	0.87661	4	0.0066589	0.022868	0.965845	473	3	2.0667	4	0.0060368	0.020848	0.961178	430	4	1.8757	4	0.00060334	0.002203	0.187762	236	4	1.8975
LSM14A	19	4	0.0023656	0.0084393	0.665793	254	3	2.168	4	0.1609	0.31941	1	5473	2	0.98204	4	0.11303	0.24045	1	4155	2	1.0093	4	0.00061505	0.0022414	0.190229	237	3	1.8907
TRIM50	7	4	0.36933	0.52499	1	9407	2	0.69386	4	0.52666	0.67316	1	12174	2	0.59887	4	0.082644	0.1873	1	3341	3	0.9527	4	0.00063147	0.0023064	0.194921	238	4	0.9048
TMEM238	19	4	0.0029403	0.010393	0.709708	291	4	2.0807	4	0.030366	0.089884	1	1565	2	1.5119	4	0.0046106	0.016077	0.876185	362	3	2.0232	4	0.00063638	0.0023227	0.195472	239	4	1.9224
ZNF461	19	4	0.004532	0.015796	0.80309	394	4	1.5291	4	0.046284	0.12084	1	2122	3	1.3804	4	0.30752	0.46622	1	8437	2	0.84632	4	0.00063975	0.0023369	0.195854	240	4	1.5489
MED29	19	4	0.00073333	0.0026608	0.473875	112	3	1.9663	4	0.040663	0.11007	1	1919	3	1.2476	4	0.0057051	0.019769	0.940466	416	4	2.0635	4	0.00064803	0.0023625	0.197178	241	3	1.834
SHANK1	19	4	0.01127	0.037503	0.948857	788	2	1.4298	4	0.00016793	0.00061949	0.332054	36	4	2.8098	4	0.046636	0.12079	1	2199	2	1.0005	4	0.00066622	0.0024364	0.20187	242	3	1.9533
ATP5SL	X	4	0.030156	0.089143	1	1581	2	0.77392	4	0.0091598	0.03096	1	603	4	1.5285	4	0.050367	0.12777	1	2341	3	1.1598	4	0.00066723	0.0024388	0.20187	243	3	1.7892
LRP3	19	4	0.014837	0.048382	1	940	3	1.7416	4	0.00047551	0.001728	0.457335	76	3	1.984	4	0.046032	0.11961	1	2178	3	1.4893	4	0.00068565	0.0025053	0.205736	244	2	0.66736
PARP6	15	4	0.30462	0.46477	1	8258	2	0.91272	4	0.087222	0.19588	1	3426	2	0.77156	4	0.032796	0.093832	1	1700	3	1.5334	4	0.00068787	0.0025122	0.205736	245	4	1.4155
KIR2DL4	19	4	0.11542	0.24474	1	4233	2	0.9566	4	0.10531	0.22757	1	3929	3	1.1879	4	0.0040701	0.01425	0.85053	333	3	1.4724	4	0.00069072	0.0025225	0.205736	246	3	1.241
NLRP7	19	4	0.0086955	0.029491	0.907662	645	3	1.9227	4	0.025958	0.080911	1	1419	2	0.28746	4	0.00109	0.0039392	0.606993	127	3	1.9317	4	0.00069242	0.0025264	0.205736	247	3	1.3451
IL1RAPL1	X	4	0.035615	0.099925	1	1779	3	1.2329	4	0.024162	0.075868	1	1333	3	1.5615	4	0.058345	0.14285	1	2628	3	1.0617	4	0.00071044	0.0025885	0.208772	248	3	1.6205
CYP2F1	19	4	0.088785	0.19848	1	3516	2	0.77994	4	0.0030897	0.010906	0.81855	263	4	1.8107	4	0.013728	0.045012	1	867	4	1.61	4	0.00071093	0.0025919	0.208772	249	3	1.602
ERF	19	4	0.0083981	0.028524	0.907662	628	3	1.6436	4	0.0075765	0.025838	0.99179	521	3	2.1028	4	0.53301	0.6721	1	12143	1	0.095342	4	0.00071241	0.0025949	0.208772	250	4	1.7649
CSNK1G1	15	4	0.1753	0.34213	1	5765	3	0.88929	4	0.041501	0.1117	1	1961	3	1.562	4	0.011556	0.038378	1	751	2	1.0677	4	0.00071684	0.0026091	0.209084	251	3	1.6553
CPZ	4	4	0.40604	0.55944	1	9965	2	0.75456	4	0.50087	0.64881	1	11737	2	0.68464	4	0.31691	0.47508	1	8625	2	0.526	4	0.00074196	0.0026894	0.213398	252	4	0.98821
ARID1A	1	4	0.10896	0.2337	1	4079	2	1.0476	4	0.027465	0.084092	1	1467	2	1.1001	4	0.054952	0.13649	1	2522	3	1.4062	4	0.0007424	0.0026904	0.213398	253	3	1.5978
C6orf99	6	4	0.32782	0.48653	1	8691	1	0.19205	4	0.012021	0.039783	1	763	4	1.402	4	0.37431	0.52878	1	9662	2	0.6761	4	0.00074436	0.0026948	0.213398	254	4	0.86952
NOSIP	19	4	0.065989	0.15756	1	2812	2	0.99826	4	0.017901	0.057641	1	1045	4	1.4704	4	0.029796	0.087871	1	1585	3	1.2236	4	0.00076004	0.0027499	0.216603	255	3	1.204
ZBTB45	19	4	0.0016923	0.0060588	0.57699	211	4	2.1503	4	0.00010952	0.00039699	0.266172	30	3	2.5577	4	0.067977	0.16086	1	2924	3	1.4602	4	0.00076181	0.0027568	0.216603	256	3	1.8101
FOXA3	19	4	0.61871	0.70993	1	13047	1	0.73469	4	0.00027007	0.00098178	0.359406	53	4	2.3025	4	0.023323	0.073453	1	1332	3	1.6903	4	0.00077263	0.0027962	0.218843	257	4	1.926
RASIP1	19	4	0.068389	0.16198	1	2876	3	1.3662	4	0.080334	0.18375	1	3215	3	1.2632	4	0.10291	0.22298	1	3897	3	1.1063	4	0.00078327	0.0028351	0.221026	258	4	1.3931
ETF1	5	4	0.0057565	0.019932	0.829423	481	3	1.9921	4	0.0098557	0.03314	1	637	2	-2.1672	4	0.00012286	0.00045754	0.230074	40	4	1.9193	4	0.00079773	0.002886	0.224129	259	2	0.38808
NTN3	16	4	0.45369	0.60426	1	10715	2	0.7528	4	0.16594	0.32744	1	5611	2	1.0294	4	0.0064359	0.02214	0.97617	449	4	1.062	4	0.00080085	0.0028981	0.2242	260	4	1.4391
THAP8	19	4	0.0054908	0.01902	0.829423	454	3	1.7285	4	0.0018129	0.0064851	0.672277	190	4	1.3707	4	0.003901	0.013665	0.84983	315	3	1.6937	4	0.00080671	0.0029133	0.224303	261	3	1.6841
CYB5D1	17	4	0.023428	0.073766	1	1332	3	1.3821	4	0.28421	0.44657	1	7991	2	0.95888	4	0.024949	0.078106	1	1399	2	1.1543	4	0.00080884	0.0029217	0.224303	262	4	1.2772
ADCK4	19	4	0.089199	0.19919	1	3530	2	0.94458	4	0.039023	0.10691	1	1858	3	1.0925	4	0.12559	0.26156	1	4519	3	1.0306	4	0.0008364	0.0030197	0.230942	263	3	1.4086
MED8	1	4	0.10789	0.23191	1	4048	2	0.91106	4	0.13483	0.27722	1	4736	2	0.62252	4	0.00052489	0.0019131	0.432362	89	4	1.9944	4	0.00084005	0.003032	0.231004	264	3	1.5707
MED18	1	4	0.0088414	0.029971	0.907662	658	2	0.95382	4	0.06153	0.14946	1	2639	3	1.5638	4	0.1368	0.28032	1	4834	2	0.77039	4	0.00084565	0.0030492	0.23144	265	2	0.87897
KCNJ12	17	4	0.0068424	0.023462	0.861142	546	4	1.5348	4	0.30511	0.46598	1	8434	2	0.34754	4	0.0062383	0.021487	0.968492	440	3	1.6849	4	0.00084848	0.003063	0.231612	266	3	1.4357
LCN9	9	4	0.045941	0.11993	1	2124	3	1.263	4	0.17212	0.33716	1	5755	2	1.1681	4	0.26281	0.42439	1	7570	2	0.79783	4	0.00086011	0.0031073	0.234082	267	3	1.618
ATF5	19	4	0.080441	0.18374	1	3256	2	1.3579	4	0.05714	0.14125	1	2482	2	1.0814	4	0.035046	0.098247	1	1794	2	0.89455	4	0.00087582	0.0031629	0.237384	268	2	-0.14881
MED10	5	4	0.15976	0.31757	1	5393	2	0.90699	4	0.1531	0.30689	1	5260	3	0.84986	4	0.015397	0.050125	1	952	2	0.81469	4	0.00091038	0.0032899	0.245453	269	3	1.2916
KIAA1549L	11	4	0.3156	0.47502	1	8461	2	0.55818	4	0.012081	0.039952	1	766	4	1.5554	4	0.04717	0.12177	1	2216	2	1.0513	4	0.00091288	0.0032948	0.245453	270	3	1.5391
PPP1R10	6	4	0.036198	0.10106	1	1794	3	1.2786	4	0.0050435	0.017537	0.944028	368	2	1.6274	4	0.068602	0.16201	1	2939	2	0.13008	4	0.0009201	0.0033293	0.247105	271	3	1.3415
TNFSF12-TNFSF13	17	4	0.0040135	0.014069	0.777107	360	4	1.8826	4	0.69176	0.74603	1	14287	1	0.25147	4	0.013916	0.045578	1	874	4	1.3298	4	0.00092458	0.0033441	0.247288	272	4	1.539
BCL2L2-PABPN1	14	4	0.0056592	0.019587	0.829423	470	3	2.1425	4	0.041077	0.11087	1	1939	2	1.2358	4	0.00045124	0.0016399	0.39268	84	1	-0.52138	4	0.00093306	0.0033662	0.247543	273	2	-0.13998
SERINC4	15	4	0.11324	0.24101	1	4175	1	0.31171	4	0.038707	0.10628	1	1845	3	1.6802	4	0.14148	0.28797	1	4960	3	0.95197	4	0.00093538	0.0033721	0.247543	274	4	1.2927
HAS1	19	4	0.058885	0.14427	1	2573	3	1.5006	4	0.018803	0.060266	1	1086	2	1.2013	4	0.019157	0.061324	1	1120	2	0.69811	4	0.00093968	0.0033908	0.247937	275	4	1.6113
SYCN	19	4	0.00034998	0.0012702	0.327558	78	3	2.0492	4	0.014355	0.046922	1	876	4	1.6533	4	0.0011753	0.0042424	0.606993	140	4	1.5917	4	0.0009427	0.0034021	0.247937	276	3	1.9852
ANKRD27	19	4	0.04904	0.12569	1	2245	2	1.1144	4	0.075156	0.17443	1	3057	3	1.1589	4	0.021707	0.068808	1	1254	4	1.1469	4	0.00095435	0.0034504	0.249644	277	4	1.5006
POLR2L	11	4	0.00018499	0.00068397	0.262003	52	3	2.3735	4	0.0018227	0.0065176	0.672277	192	3	2.3124	4	0.14523	0.29406	1	5057	2	0.82615	4	0.00096345	0.0034789	0.250807	278	3	1.3284
SARS2	19	4	0.12977	0.26872	1	4617	2	-2.4279	4	0.0068873	0.023599	0.974101	483	3	1.9903	4	0.0037522	0.013156	0.84983	305	4	1.5577	4	0.00097344	0.0035159	0.252564	279	2	0.3459
ZNF562	19	4	0.15365	0.30771	1	5226	3	1.0903	4	0.0056892	0.019709	0.962383	403	3	2.1192	4	0.076341	0.17602	1	3179	2	1.0648	4	0.00098102	0.00354	0.253391	280	3	1.5625
SV2C	5	4	0.31892	0.47811	1	8520	2	0.55133	4	0.040879	0.11048	1	1931	3	1.5892	4	0.22886	0.39264	1	6928	2	0.32966	4	0.00098892	0.0035705	0.25467	281	4	1.2629
KLK2	19	4	0.00028933	0.0010625	0.296823	72	2	1.7545	4	0.0025755	0.0091496	0.77315	232	4	1.5191	4	0.0069211	0.023723	0.97617	482	4	1.2504	4	0.00099763	0.0036	0.255869	282	3	1.7642
MFAP4	17	4	0.011745	0.038919	0.958141	809	3	1.9889	4	0.00086918	0.0031427	0.54639	115	3	2.4129	4	0.0094475	0.031868	1	623	2	-0.2111	4	0.0010017	0.0036168	0.256153	283	3	1.6427
HILPDA	7	4	0.15399	0.30824	1	5236	3	0.9508	4	0.16846	0.33142	1	5674	3	0.90558	4	0.40554	0.5583	1	10130	2	0.44082	4	0.0010063	0.003635	0.25654	284	4	1.0281
POLR2A	17	4	0.045527	0.11914	1	2102	3	1.3497	4	0.0040762	0.014266	0.887753	318	2	1.5025	4	0.015198	0.049489	1	939	3	1.6134	4	0.001031	0.0037231	0.261307	285	3	2.2703
KLK11	19	4	0.0042917	0.015002	0.792794	379	4	1.8525	4	0.0063342	0.021805	0.964579	450	2	1.3785	4	0.00050743	0.0018506	0.427848	87	3	2.5121	4	0.0010324	0.0037285	0.261307	286	2	0.69721
RABAC1	19	4	0.013984	0.045792	1	903	3	1.5921	4	0.0022087	0.007884	0.737578	212	3	2.3703	4	0.03134	0.090942	1	1648	2	-0.83016	4	0.001051	0.0038078	0.265934	287	2	1.0065
OAF	11	4	0.13613	0.27934	1	4778	2	0.91414	4	0.1377	0.28203	1	4818	3	1.0119	4	0.39906	0.55218	1	10031	2	0.2123	4	0.0010567	0.0038255	0.266248	288	4	1.0438
HSPA5	9	4	0.004608	0.016063	0.807735	399	4	1.9494	4	0.12522	0.26122	1	4465	3	1.0679	4	0.049816	0.12673	1	2322	3	1.4388	4	0.0010784	0.0039032	0.270724	289	4	1.3339
MRPS12	19	4	0.00027645	0.0010044	0.291584	69	4	2.5101	4	0.12579	0.26217	1	4486	2	1.1257	4	0.0011812	0.0042641	0.606993	141	3	1.8498	4	0.0010888	0.0039348	0.271971	290	3	1.6824
GID4	17	4	0.053251	0.1337	1	2393	2	0.78729	4	0.0022487	0.0080346	0.741376	214	3	2.1199	4	0.001159	0.0041838	0.606993	137	4	2.2428	4	0.0011015	0.0039855	0.274532	291	3	2.1904
LILRB4	19	4	0.061446	0.14905	1	2652	3	1.3122	4	0.077482	0.17861	1	3131	2	0.93748	4	0.0011204	0.0040421	0.606993	131	4	1.5853	4	0.0011143	0.0040194	0.275927	292	3	1.4934
SRRM5	19	4	0.16429	0.32478	1	5507	2	0.99193	4	0.24268	0.40815	1	7187	2	0.53722	4	0.063377	0.15224	1	2777	3	1.1939	4	0.0011232	0.0040522	0.277228	293	4	1.1023
EEF2	19	4	0.07216	0.16881	1	2990	2	1.0963	4	0.15722	0.31355	1	5377	2	1.0783	4	0.0016017	0.0057339	0.639131	178	3	2.1012	4	0.0011304	0.0040731	0.277714	294	3	1.7323
P2RX4	12	4	0.052434	0.13211	1	2370	3	1.299	4	0.14745	0.29783	1	5107	3	1.3323	4	0.25985	0.42165	1	7505	2	0.89531	4	0.0011403	0.0041129	0.279486	295	4	1.4649
LOC101060389	10	4	0.051478	0.13034	1	2335	3	1.5558	4	0.0059609	0.020613	0.962383	423	3	2.0709	4	0.24503	0.40775	1	7223	2	0.40195	4	0.0011505	0.0041474	0.279521	296	3	1.7517
CGB2	19	4	0.0023542	0.0083955	0.665793	253	2	0.76974	4	0.00695	0.023807	0.975268	488	3	1.9884	4	0.0010447	0.0037822	0.606993	123	4	2.13	4	0.0011532	0.0041597	0.279521	297	4	2.542
USP50	15	4	0.18277	0.35178	1	5938	2	1.0777	4	0.093861	0.20757	1	3617	3	1.1027	4	0.070603	0.16565	1	3008	3	1.0639	4	0.0011536	0.0041607	0.279521	298	4	1.5041
PGLYRP1	19	4	0.0018699	0.0066869	0.596403	225	3	2.3885	4	0.016165	0.052463	1	967	2	0.37227	4	0.10705	0.23019	1	4003	2	0.029413	4	0.0011554	0.0041691	0.279521	299	3	1.6073
MEIS3	19	4	0.05943	0.14529	1	2588	3	1.4304	4	0.014019	0.045897	1	858	4	1.6457	4	0.023976	0.07536	1	1357	2	1.2774	4	0.0011729	0.004234	0.282424	300	4	1.6215
GYS1	19	4	0.052953	0.1331	1	2382	3	1.3279	4	0.041323	0.11135	1	1949	2	1.3324	4	0.0088745	0.030072	1	590	4	1.2964	4	0.0011905	0.0042975	0.285282	301	4	1.49
HCST	19	4	0.0040559	0.014208	0.777107	366	4	2.3024	4	0.034185	0.097446	1	1687	3	1.5922	4	0.01063	0.03553	1	704	3	1.3991	4	0.0011996	0.004333	0.286689	302	4	1.845
GSK3A	19	4	0.0060224	0.0208	0.841436	495	3	1.8429	4	0.014629	0.047773	1	885	4	1.49	4	4.7225e-05	0.00018336	0.136736	26	2	1.9164	4	0.0012045	0.0043576	0.287372	303	4	2.0528
MYPOP	19	4	0.058113	0.14285	1	2547	2	1.0619	4	0.11864	0.25028	1	4302	3	1.3195	4	0.0069178	0.023708	0.97617	481	3	1.7429	4	0.0012135	0.004392	0.287401	304	3	1.5718
CAND1	12	4	0.046593	0.12117	1	2148	3	1.4128	4	0.16124	0.31999	1	5482	3	0.98314	4	0.16178	0.32079	1	5563	2	0.073259	4	0.0012172	0.0044068	0.287401	305	3	1.1354
LYPD3	19	4	0.0066172	0.022746	0.856966	531	3	1.7323	4	0.0075217	0.025662	0.990336	516	2	0.4386	4	0.0097473	0.032801	1	644	4	1.5081	4	0.0012177	0.0044078	0.287401	306	4	1.8508
FXYD1	19	4	0.00023797	0.00086758	0.273953	62	2	0.7934	4	0.0079812	0.027171	0.997259	542	3	1.6836	4	0.010494	0.0351	1	694	2	0.51382	4	0.0012196	0.0044152	0.287401	307	3	0.93937
SIGLEC7	19	4	0.0050813	0.017669	0.818766	433	4	2.0506	4	0.19579	0.36501	1	6292	1	-0.27384	4	0.022605	0.071366	1	1288	3	1.4047	4	0.0012239	0.0044299	0.287432	308	3	1.7141
NPHS1	19	4	0.041087	0.11061	1	1970	2	1.1866	4	0.011945	0.039558	1	756	3	1.5843	4	0.42355	0.57541	1	10428	2	0.35892	4	0.0012415	0.0044989	0.290965	309	4	1.2665
TJAP1	6	4	0.028081	0.08506	1	1505	2	0.78975	4	0.27663	0.43962	1	7839	2	0.58423	4	0.067892	0.16071	1	2919	2	0.83276	4	0.0012737	0.0046106	0.297236	310	2	0.83543
NLRP12	19	4	0.00021109	0.00077356	0.273576	55	4	2.3811	4	0.017015	0.055001	1	1010	2	0.37576	4	0.37805	0.53223	1	9715	1	-1.6129	4	0.0012806	0.0046328	0.29771	311	2	0.067161
CCDC97	19	4	0.010873	0.036285	0.942929	768	4	2.043	4	0.017859	0.057519	1	1042	3	1.584	4	0.0043503	0.01519	0.861844	348	3	1.9092	4	0.0013174	0.0047696	0.305528	312	3	1.7682
FAM71E1	19	4	0.02725	0.083336	1	1473	3	1.4392	4	0.02734	0.083845	1	1462	3	1.6595	4	0.0029429	0.010401	0.81145	254	4	2.0805	4	0.0013411	0.0048429	0.309241	313	3	1.6892
IRGC	19	4	0.067859	0.16103	1	2865	1	-0.70383	4	0.077314	0.17831	1	3126	2	1.0197	4	0.036384	0.10091	1	1846	3	1.2433	4	0.0013597	0.0049094	0.312492	314	3	1.3404
OR13C2	9	4	0.063244	0.15238	1	2722	3	1.153	4	0.12615	0.26279	1	4497	3	1.1706	4	0.35861	0.5141	1	9431	2	0.46068	4	0.0013688	0.0049399	0.312582	315	3	1.3757
DCDC2	6	4	0.0054371	0.018835	0.829423	452	2	-0.62569	4	0.08359	0.18947	1	3314	2	0.99265	4	0.070511	0.16547	1	3005	3	1.1284	4	0.0013691	0.0049419	0.312582	316	2	0.95911
ZZEF1	17	4	0.30765	0.46755	1	8312	2	0.75027	4	0.096775	0.21269	1	3699	3	1.0865	4	0.0021025	0.0075173	0.756015	199	4	1.3021	4	0.0013877	0.004999	0.31431	317	4	1.4439
ZFP36	19	4	0.024181	0.075919	1	1363	3	1.2122	4	0.044403	0.11727	1	2054	3	1.6568	4	0.037128	0.10234	1	1872	3	1.1574	4	0.0013881	0.0050005	0.31431	318	3	1.9938
LAIR1	19	4	0.090082	0.20072	1	3554	2	1.2237	4	0.06303	0.15224	1	2695	3	1.3446	4	0.10727	0.23058	1	4008	3	1.0914	4	0.0013946	0.0050206	0.31431	319	4	1.5354
IL12RB1	19	4	0.025551	0.079779	1	1419	4	1.429	4	0.26874	0.43224	1	7684	1	0.32703	4	0.10868	0.233	1	4042	2	0.62945	4	0.0013976	0.0050317	0.31431	320	3	1.4492
UBAP2L	1	4	0.95906	0.95915	1	19097	0	0.051626	4	0.018308	0.058833	1	1058	4	1.364	4	0.07083	0.16603	1	3021	3	1.2204	4	0.00141	0.0050807	0.316387	321	4	1.1527
CHN1	2	4	0.35577	0.51234	1	9216	2	0.57791	4	0.064064	0.15421	1	2729	3	1.5276	4	0.12967	0.26839	1	4633	3	0.94101	4	0.0014153	0.0051038	0.316847	322	3	1.5675
ZNF248	10	4	0.31459	0.47408	1	8439	2	0.61813	4	0.0077028	0.026252	0.9958	525	4	1.6873	4	0.12484	0.26034	1	4496	2	0.77966	4	0.0014354	0.0051772	0.320411	323	4	1.2765
TNFRSF17	16	4	0.16143	0.32026	1	5430	3	0.86808	4	0.15581	0.31124	1	5339	3	1.0903	4	0.44376	0.59441	1	10746	2	0.41847	4	0.0014413	0.0052013	0.320917	324	4	1.0324
IGLON5	19	4	0.074692	0.17336	1	3079	3	1.3678	4	0.006601	0.022686	0.965845	469	3	2.2041	4	0.020484	0.065249	1	1188	4	1.1403	4	0.0014557	0.0052446	0.3226	325	4	1.9644
SYT3	19	4	0.0077991	0.026573	0.879649	604	2	0.97996	4	0.042371	0.11339	1	1987	2	0.84037	4	0.01576	0.051229	1	969	2	0.73063	4	0.0014659	0.0052825	0.32394	326	3	1.166
PSMA8	18	4	0.22184	0.38789	1	6695	2	0.77057	4	0.1632	0.32311	1	5541	2	1.1923	4	0.023329	0.073468	1	1333	4	0.80833	4	0.0014929	0.0053711	0.328128	327	4	1.3095
DDOST	1	4	0.0095677	0.032249	0.916741	702	4	1.6135	4	0.061172	0.14877	1	2625	3	1.3615	4	0.84467	0.84589	1	16819	1	0.27207	4	0.0014961	0.0053834	0.328128	328	4	1.4396
OR6T1	11	4	0.074546	0.17308	1	3076	3	0.84086	4	0.34111	0.49941	1	9199	2	0.99455	4	0.036203	0.10055	1	1839	3	1.3044	4	0.0015071	0.0054152	0.329066	329	4	1.1837
CCDC71	3	4	0.13739	0.28144	1	4816	1	0.51588	4	0.036367	0.1017	1	1770	3	1.1445	4	0.55994	0.68252	1	12464	1	0.50011	4	0.0015272	0.0054996	0.332189	330	3	1.1194
NEURL4	17	4	0.011461	0.03808	0.953838	796	4	1.5449	4	0.16375	0.32398	1	5553	1	-0.022513	4	0.10377	0.22445	1	3922	3	1.0579	4	0.0015276	0.0054996	0.332189	331	4	1.3831
LTBP4	19	4	0.0032254	0.011382	0.72221	316	2	1.2135	4	0.0025401	0.0090265	0.772593	230	4	1.7872	4	0.013941	0.045652	1	878	3	1.3443	4	0.0015448	0.0055582	0.334722	332	3	1.8407
DMPK	19	4	0.0020909	0.0074868	0.634183	237	2	0.91452	4	0.0062092	0.021404	0.962383	439	3	2.0089	4	0.050114	0.12729	1	2331	3	1.3552	4	0.00157	0.0056318	0.338141	333	3	1.5598
SUV420H2	19	4	0.27114	0.43364	1	7625	2	0.77786	4	0.024622	0.077167	1	1353	3	1.7569	4	0.020062	0.063987	1	1167	4	1.7382	4	0.0016298	0.0058348	0.34929	334	4	1.4215
ACP5	19	4	0.17693	0.34466	1	5806	2	0.99329	4	0.015023	0.048944	1	906	4	1.5808	4	0.93696	0.93699	1	18701	0	-0.3185	4	0.0016415	0.0058776	0.350809	335	4	1.1782
UCK1	9	4	0.37017	0.52576	1	9426	2	0.75023	4	0.10638	0.22942	1	3958	3	1.2933	4	0.068992	0.16271	1	2957	3	1.419	4	0.0017013	0.0060927	0.361647	336	4	1.5529
DHX33	17	4	0.73968	0.77162	1	14779	1	0.6329	4	0.056138	0.13937	1	2451	3	1.3061	4	0.086889	0.1948	1	3457	3	1.005	4	0.0017059	0.006108	0.361647	337	4	1.2608
BCAT2	19	4	0.024716	0.077436	1	1379	2	1.2183	4	0.023641	0.074405	1	1317	2	1.1971	4	0.14965	0.30124	1	5202	2	0.75108	4	0.0017096	0.0061213	0.361647	338	3	1.386
NUP62	19	4	0.0063128	0.021727	0.851322	511	3	1.6556	4	0.15531	0.31045	1	5315	1	-0.25209	4	0.020199	0.064396	1	1173	2	1.1816	4	0.0017123	0.0061311	0.361647	339	3	1.3033
MPL	1	4	0.63092	0.71543	1	13213	1	0.2001	4	0.17167	0.33646	1	5745	2	1.0776	4	0.68655	0.74054	1	14078	1	0.024747	4	0.0017343	0.0062143	0.364763	340	4	0.88062
SLC17A7	19	4	0.019068	0.061069	1	1115	2	0.66087	4	0.010304	0.034515	1	666	2	-0.5786	4	0.0091643	0.030975	1	604	2	0.097486	4	0.0017361	0.0062202	0.364763	341	2	0.67737
CLK1	2	4	0.87149	0.87114	1	17266	0	0.57231	4	0.011688	0.03876	1	741	3	1.8381	4	0.079902	0.18242	1	3282	3	1.258	4	0.0017478	0.0062616	0.365443	342	3	1.4191
C19orf33	19	4	0.0029494	0.010428	0.709708	293	4	1.7659	4	0.078385	0.18023	1	3162	2	-1.1095	4	0.0029383	0.010384	0.81145	252	3	1.7199	4	0.0017521	0.0062754	0.365443	343	2	1.1654
PRR23B	3	4	0.03173	0.092241	1	1640	3	1.2669	4	0.1339	0.27567	1	4702	3	0.9545	4	0.76939	0.78875	1	15418	1	0.51827	4	0.0017571	0.0062906	0.365443	344	4	1.105
NXF1	11	4	0.022591	0.071329	1	1285	4	1.4794	4	0.21273	0.38059	1	6620	1	0.42753	4	0.010568	0.035327	1	700	2	0.74443	4	0.0017626	0.0063152	0.365443	345	4	1.0776
NFKBIB	19	4	0.17047	0.33461	1	5640	3	1.2241	4	0.16074	0.31916	1	5468	3	1.3437	4	0.002241	0.0080046	0.770359	208	3	2.1477	4	0.0017673	0.006328	0.365443	346	3	1.8359
MTRNR2L8	11	4	0.35286	0.50965	1	9171	2	0.80519	4	0.25218	0.41691	1	7350	2	1.07	4	0.25342	0.41561	1	7385	2	0.35068	4	0.0017718	0.0063408	0.365443	347	4	1.1572
C19orf12	19	4	0.0046564	0.016231	0.8101	402	4	2.0563	4	0.084856	0.19167	1	3347	2	1.013	4	0.067305	0.15963	1	2905	3	1.2628	4	0.0017847	0.006394	0.367454	348	4	1.7268
ZNF480	19	4	0.056565	0.13992	1	2504	3	1.4477	4	0.006381	0.021964	0.964579	454	2	-0.27231	4	0.017404	0.056166	1	1041	4	1.317	4	0.0018059	0.0064605	0.370215	349	3	1.1676
IL11	19	4	0.0029358	0.01038	0.709708	290	3	2.03	4	0.15527	0.31038	1	5313	3	1.1823	4	0.0020209	0.0072377	0.738981	196	3	2.0012	4	0.0018168	0.0064974	0.37067	350	3	1.6179
RPAP1	15	4	0.025057	0.078391	1	1395	4	1.4386	4	0.0024282	0.0086613	0.762998	224	4	2.39	4	0.0022294	0.0079584	0.770359	205	3	1.9579	4	0.0018195	0.0065052	0.37067	351	3	2.099
CNTD2	19	4	0.04417	0.11656	1	2067	3	1.564	4	0.0019059	0.0068144	0.685322	197	2	1.5494	4	0.020477	0.06523	1	1187	4	1.6229	4	0.0018468	0.0066012	0.375077	352	3	1.5074
CLC	19	4	0.00065123	0.0023753	0.440957	108	3	2.222	4	0.1358	0.27884	1	4766	2	0.398	4	0.19607	0.36223	1	6314	2	0.92761	4	0.0018547	0.0066313	0.375722	353	4	1.1776
ARHGEF1	19	4	0.0099249	0.033341	0.917399	727	3	1.7376	4	0.015686	0.051008	1	944	3	2.0736	4	0.024075	0.075628	1	1361	2	1.0977	4	0.0018633	0.0066628	0.375726	354	4	1.6177
ETV2	19	4	0.026681	0.082144	1	1452	2	1.1935	4	0.0022279	0.0079539	0.740672	213	4	2.0064	4	0.14945	0.3009	1	5196	2	0.71413	4	0.0018653	0.0066701	0.375726	355	4	1.4345
ZNF230	19	4	0.0012194	0.0044147	0.553195	160	4	1.8768	4	0.28695	0.44905	1	8039	2	1.0849	4	0.070125	0.16479	1	2993	2	1.0643	4	0.0018699	0.0066874	0.375726	356	3	1.5976
E2F4	16	4	0.064158	0.15415	1	2751	3	1.171	4	0.41926	0.57224	1	10404	2	0.82312	4	0.54048	0.67492	1	12241	1	0.47788	4	0.0018859	0.006743	0.377796	357	4	1.1937
XRCC1	19	4	0.0082698	0.028101	0.904272	621	2	0.68559	4	0.054681	0.13669	1	2400	2	1.2578	4	0.031494	0.091252	1	1653	2	-1.1949	4	0.0018921	0.0067652	0.377984	358	2	0.57186
CENPT	16	4	0.54818	0.68062	1	12123	1	0.14439	4	0.085998	0.1937	1	3388	3	1.4021	4	0.14505	0.29375	1	5053	2	0.70445	4	0.001945	0.0069527	0.385395	359	4	0.98134
SLC37A1	21	4	0.52278	0.66942	1	11822	2	0.25965	4	0.10322	0.2239	1	3873	3	1.2369	4	0.063194	0.15189	1	2770	3	1.1751	4	0.0019476	0.006963	0.385395	360	3	1.2811
DYRK1B	19	4	0.34165	0.4993	1	8949	2	0.95156	4	0.02012	0.064175	1	1153	3	1.729	4	0.134	0.27559	1	4752	3	0.85676	4	0.0019496	0.0069719	0.385395	361	4	1.3345
HIP1	7	4	0.79304	0.80579	1	15738	1	0.23076	4	0.021222	0.067367	1	1204	4	1.3644	4	0.10742	0.23087	1	4014	3	0.87083	4	0.0019569	0.006997	0.385395	362	4	1.0839
OR1D2	17	4	0.021102	0.067014	1	1210	3	1.4033	4	0.13695	0.2808	1	4796	3	1.3859	4	0.10289	0.22295	1	3896	2	1.0406	4	0.0019609	0.0070098	0.385395	363	4	1.5624
NEDD8	14	4	0.061599	0.14934	1	2657	3	0.95907	4	0.0087336	0.029619	1	586	3	1.7269	4	0.031327	0.09092	1	1647	3	1.4294	4	0.0019619	0.0070128	0.385395	364	3	1.6218
TMEM91	19	4	0.035026	0.098734	1	1758	3	1.3842	4	0.14084	0.28715	1	4920	3	1.2581	4	0.010838	0.036184	1	713	3	1.7776	4	0.001983	0.0070841	0.388256	365	3	1.6389
A1BG	19	4	0.014756	0.048139	1	934	3	1.2978	4	0.32432	0.48388	1	8857	2	0.4648	4	0.028805	0.085925	1	1544	3	1.1554	4	0.0020067	0.0071742	0.392125	366	3	1.3033
CAMKK1	17	4	0.090972	0.20227	1	3582	2	0.8391	4	0.34016	0.49853	1	9188	1	0.034377	4	0.091457	0.20285	1	3570	2	1.0085	4	0.0020177	0.007222	0.393043	367	3	1.0485
SGSM2	17	4	0.24602	0.41026	1	7159	2	0.37584	4	0.30935	0.46989	1	8511	2	0.8619	4	0.022764	0.071833	1	1300	2	0.9641	4	0.0020206	0.0072333	0.393043	368	4	1.2292
RNF151	16	4	0.0096847	0.032605	0.917399	708	3	1.85	4	0.098269	0.21533	1	3731	2	0.65819	4	0.11029	0.23581	1	4085	3	1.2381	4	0.0020275	0.0072549	0.393043	369	3	1.635
YBX3	12	4	0.13448	0.27658	1	4729	3	0.92358	4	0.43991	0.59159	1	10736	2	0.75988	4	0.73765	0.76904	1	14901	1	0.52947	4	0.0020365	0.0072859	0.393043	370	4	0.99105
MMP15	16	4	0.15017	0.30219	1	5138	3	0.8235	4	0.3498	0.50746	1	9392	1	0.431	4	0.17452	0.34091	1	5875	3	0.70586	4	0.0020416	0.0073012	0.393043	371	4	1.0478
PLAUR	19	4	0.0023669	0.0084407	0.665793	255	4	2.2429	4	0.045203	0.11881	1	2076	3	1.3582	4	0.076588	0.17646	1	3188	3	1.2399	4	0.0020462	0.0073209	0.393043	372	4	1.5171
UCKL1	20	4	0.16958	0.33318	1	5623	3	0.9975	4	0.17899	0.34792	1	5923	3	1.0628	4	0.48777	0.63623	1	11454	2	0.61589	4	0.0020482	0.0073278	0.393043	373	4	1.1442
HIPK4	19	4	0.00095046	0.0034336	0.531849	129	3	1.8245	4	0.01386	0.04542	1	852	4	1.3114	4	0.013643	0.044739	1	861	3	1.3101	4	0.0020677	0.0074051	0.396132	374	4	1.3688
PDZRN4	12	4	0.29399	0.45476	1	8045	2	0.6786	4	0.17657	0.34409	1	5856	2	0.95905	4	0.83438	0.83702	1	16632	1	0.48006	4	0.002074	0.0074248	0.396132	375	4	1.1762
PAX8	2	4	0.85448	0.85501	1	16915	1	0.54922	4	0.21682	0.38436	1	6687	2	0.76277	4	0.10691	0.22994	1	3998	3	1.0175	4	0.0020969	0.007506	0.399405	376	4	1.0919
OGDH	7	4	0.16394	0.32423	1	5491	3	0.9649	4	0.016377	0.053109	1	977	4	1.2539	4	0.71602	0.75646	1	14532	1	0.28026	4	0.0021221	0.0075793	0.402244	377	4	1.3019
PIH1D1	19	4	0.018049	0.058079	1	1079	2	1.2354	4	0.00038089	0.0013879	0.410604	66	3	2.807	4	0.0039543	0.013867	0.84983	323	3	2.0191	4	0.0021584	0.0077088	0.407695	378	2	1.3923
SART1	11	4	0.23547	0.40056	1	6944	2	0.85527	4	0.011276	0.037523	1	713	4	1.2374	4	0.53967	0.67461	1	12226	1	0.24826	4	0.002162	0.0077226	0.407695	379	4	1.3005
MED15	22	4	0.023399	0.073679	1	1331	4	0.997	4	0.17232	0.33747	1	5761	3	1.0467	4	0.25327	0.41546	1	7384	1	0.43885	4	0.002177	0.0077738	0.409262	380	4	1.0889
PLK1	16	4	0.0048366	0.016845	0.813835	414	3	1.9132	4	0.0011444	0.0041257	0.592751	139	3	2.3469	4	0.43301	0.58436	1	10579	2	0.36672	4	0.0021832	0.007793	0.409262	381	3	1.8692
CEBPA	19	4	0.019196	0.061446	1	1122	2	0.81745	4	0.008534	0.02895	1	572	3	1.0822	4	0.020494	0.065273	1	1190	4	0.86675	4	0.00219	0.0078166	0.409434	382	4	1.3481
CYP26C1	10	4	0.038979	0.10652	1	1888	3	1.3664	4	0.010119	0.03395	1	651	3	1.7186	4	0.72122	0.75943	1	14616	1	-0.19314	4	0.0022194	0.0079244	0.411593	383	3	1.4009
GYLTL1B	8	4	0.16146	0.32032	1	5431	3	1.0575	4	0.08036	0.18379	1	3217	2	0.75068	4	0.045354	0.11834	1	2158	2	0.77068	4	0.0022213	0.0079313	0.411593	384	3	1.3659
CCS	11	4	0.16515	0.32614	1	5527	3	0.90919	4	0.10247	0.22262	1	3845	3	1.0869	4	0.88479	0.88445	1	17619	0	-0.22147	4	0.0022214	0.0079318	0.411593	385	4	0.95874
ZNF587B	19	4	0.0042138	0.014743	0.792794	371	4	1.9322	4	0.90667	0.90656	1	18066	0	0.5106	4	0.014302	0.046772	1	896	2	1.1557	4	0.0022244	0.0079396	0.411593	386	3	1.522
ZNF599	19	4	0.35449	0.51116	1	9194	2	0.41767	4	0.014525	0.047469	1	881	3	1.9187	4	0.077548	0.17817	1	3210	2	0.93471	4	0.0022349	0.0079795	0.412596	387	3	1.0822
VGF	7	4	0.19474	0.36289	1	6179	2	1.1127	4	0.15805	0.31488	1	5394	3	0.97649	4	0.0013432	0.0048503	0.623233	152	4	1.9244	4	0.0022543	0.0080583	0.4156	388	4	1.6753
THOC3	5	4	0.0076323	0.026021	0.877715	593	4	1.8424	4	0.003909	0.013687	0.883265	305	2	-0.28341	4	2.7339e-06	1.206e-05	0.040429	6	4	2.9731	4	0.0022649	0.0080885	0.416095	389	4	1.8227
ZNF547	19	4	0.5855	0.69559	1	12600	1	0.081726	4	0.1014	0.22081	1	3813	3	1.0373	4	0.13822	0.28268	1	4868	3	0.71976	4	0.0022731	0.0081169	0.416486	390	4	0.86313
KRT38	17	4	0.49781	0.64585	1	11422	2	0.44765	4	0.14988	0.30176	1	5174	2	1.1176	4	0.20861	0.37388	1	6563	2	0.8348	4	0.0023082	0.0082416	0.41994	391	3	1.3459
PAGE5	X	4	0.277	0.43913	1	7733	2	-0.47381	4	0.0047426	0.016533	0.923749	355	2	0.95551	4	0.81511	0.82133	1	16258	0	-1.5681	4	0.0023094	0.0082468	0.41994	392	2	0.19086
TMEM107	17	4	0.088944	0.19875	1	3521	2	0.98376	4	0.15032	0.30248	1	5187	2	0.88323	4	0.06907	0.16285	1	2958	3	1.095	4	0.0023094	0.0082468	0.41994	393	4	1.3231
SSX2	X	4	0.0071145	0.024355	0.867933	558	1	0.53015	4	0.27424	0.43742	1	7793	2	0.94111	4	0.022351	0.070633	1	1277	3	1.3639	4	0.0023209	0.0082842	0.42078	394	3	1.2419
KLK3	19	4	0.0072223	0.024705	0.867933	564	3	1.6975	4	0.1385	0.28334	1	4847	2	0.60435	4	0.0074599	0.025466	0.977997	517	3	1.4544	4	0.0023402	0.0083438	0.422737	395	3	1.3002
PPFIA3	19	4	0.011602	0.038514	0.955513	803	2	1.0797	4	0.022952	0.072345	1	1286	3	1.4665	4	0.011759	0.038964	1	764	2	0.35052	4	0.0023713	0.0084575	0.427422	396	2	-0.007945
CALHM1	10	4	0.15619	0.31181	1	5296	3	0.79511	4	0.30256	0.46364	1	8378	2	0.90552	4	0.28952	0.44933	1	8092	2	0.64	4	0.0024608	0.008775	0.442339	397	4	1.0221
RTF1	15	4	0.1232	0.25779	1	4438	3	1.1951	4	0.01371	0.044957	1	846	3	1.9456	4	0.037823	0.10373	1	1890	2	1.2001	4	0.0024686	0.0087966	0.442339	398	3	1.7744
PSMB4	1	4	0.047535	0.1229	1	2183	3	1.5349	4	0.009156	0.030948	1	602	4	1.5218	4	0.27412	0.43503	1	7793	2	0.77548	4	0.0024975	0.008886	0.444776	399	4	1.5268
U2AF2	19	4	0.0005125	0.0018683	0.40847	92	3	2.3819	4	0.045805	0.11995	1	2101	2	0.52154	4	0.040766	0.10948	1	2015	3	1.595	4	0.002504	0.0089084	0.444776	400	3	2.0179
USF2	19	4	0.014431	0.047161	1	924	3	1.2411	4	0.18672	0.35658	1	6101	2	0.70209	4	0.0050947	0.017715	0.896865	388	4	2.0153	4	0.0025132	0.0089374	0.444776	401	3	2.1286
DOC2B	17	4	0.016305	0.0529	1	1001	2	1.4769	4	0.29879	0.46007	1	8310	2	0.8487	4	0.13505	0.27737	1	4785	3	0.90664	4	0.0025155	0.0089433	0.444776	402	4	1.2249
FAM83F	22	4	0.091806	0.20376	1	3613	2	0.98062	4	0.048125	0.12426	1	2189	3	1.5932	4	0.45904	0.60892	1	10992	2	0.62029	4	0.0025197	0.0089581	0.444776	403	4	1.0963
MTRF1	13	4	0.33388	0.49211	1	8809	2	0.65426	4	0.12421	0.25958	1	4440	2	0.62294	4	0.083561	0.18889	1	3366	2	-1.3923	4	0.0025263	0.0089778	0.444776	404	2	-0.1117
DNASE2B	1	4	0.10646	0.2294	1	4010	3	1.3353	4	0.68703	0.74358	1	14215	1	-0.28993	4	0.050719	0.12843	1	2358	3	0.99431	4	0.0025845	0.0091786	0.453609	405	4	0.7994
SLC35G6	17	4	0.10528	0.22738	1	3984	1	0.49094	4	0.005498	0.019049	0.959082	393	4	1.4597	4	0.24335	0.40618	1	7196	2	0.42122	4	0.0025967	0.0092205	0.454102	406	4	0.98103
FUT1	19	4	0.00075903	0.0027484	0.473875	116	4	2.0988	4	0.10762	0.23157	1	4002	2	0.51479	4	0.21142	0.37651	1	6611	2	0.91368	4	0.0026035	0.0092338	0.454102	407	4	1.576
KRTAP3-2	17	4	0.085896	0.19331	1	3418	2	1.0373	4	0.74353	0.77472	1	15106	1	0.46069	4	0.080996	0.18438	1	3312	2	0.58032	4	0.0026188	0.0092864	0.454786	408	4	1.0748
CYTH2	19	4	0.021243	0.06743	1	1219	3	1.4795	4	0.077047	0.17785	1	3117	3	1.3815	4	0.048102	0.12347	1	2250	2	0.36698	4	0.0026229	0.0092973	0.454786	409	4	1.4042
ERVV-2	19	4	0.48466	0.63354	1	11201	2	0.54745	4	0.058482	0.14375	1	2528	3	1.3362	4	0.0085604	0.029045	0.998575	578	3	1.3968	4	0.0026327	0.0093278	0.454786	410	3	1.5652
SLU7	5	4	0.0054082	0.01874	0.829423	449	3	2.2269	4	0.0023237	0.0082926	0.754738	218	2	1.8573	4	0.07155	0.16734	1	3040	3	1.1646	4	0.0026359	0.0093381	0.454786	411	3	1.9124
H2BFWT	X	4	0.05882	0.14415	1	2570	2	-1.6748	4	0.12309	0.25769	1	4415	3	1.1805	4	0.039939	0.10787	1	1979	2	1.1184	4	0.0026457	0.0093642	0.454955	412	2	0.40058
UNC13A	19	4	0.023466	0.073869	1	1336	2	0.33152	4	0.06036	0.14724	1	2597	3	1.3532	4	0.046118	0.11978	1	2182	2	-2.9717	4	0.0026785	0.0094666	0.458615	413	2	-0.49976
TRPV3	17	4	0.84131	0.84332	1	16643	0	0.44763	4	0.080654	0.18433	1	3229	2	1.2893	4	0.013921	0.045599	1	875	2	1.3241	4	0.0026841	0.0094902	0.458615	414	3	1.4694
ZSCAN22	19	4	0.29998	0.46045	1	8165	1	0.55582	4	0.21421	0.38198	1	6649	2	1.1221	4	0.00044257	0.0016015	0.390135	81	3	1.8634	4	0.0026883	0.0095079	0.458615	415	3	1.4718
FRRS1L	9	4	0.047247	0.12238	1	2176	2	1.1802	4	0.13288	0.27395	1	4683	3	1.0482	4	0.010497	0.03511	1	695	4	1.4286	4	0.0027002	0.0095537	0.459465	416	3	1.4124
PLEKHG2	19	4	0.075711	0.17525	1	3107	3	1.5031	4	0.022187	0.070165	1	1252	2	1.6174	4	0.00028663	0.0010507	0.34237	61	4	2.3718	4	0.0027048	0.0095714	0.459465	417	3	1.9515
FBL	19	4	0.016584	0.053702	1	1022	2	1.0508	4	0.031667	0.09243	1	1606	2	1.2513	4	0.016307	0.052909	1	989	3	1.7311	4	0.0027114	0.0095941	0.459465	418	4	1.6875
CNIH4	1	4	0.079834	0.18264	1	3232	3	1.0903	4	0.007744	0.0264	0.9958	529	3	1.609	4	0.023119	0.072833	1	1315	3	1.2194	4	0.0027346	0.009665	0.46176	419	3	1.0544
TXNDC17	17	4	0.015821	0.051421	1	981	3	1.8301	4	0.0034521	0.012134	0.865217	275	3	2.1179	4	0.15877	0.31593	1	5489	2	0.75446	4	0.0027479	0.0097127	0.462222	420	2	0.88721
PLA2G2A	1	4	0.66982	0.73395	1	13757	1	0.0054313	4	0.027552	0.084284	1	1473	3	1.1328	4	0.026018	0.080265	1	1433	3	0.72841	4	0.0027503	0.0097206	0.462222	421	3	1.1866
P2RX3	11	4	0.030378	0.089588	1	1587	3	1.676	4	0.0095455	0.032171	1	618	2	0.75839	4	0.16649	0.32824	1	5669	2	1.0008	4	0.0027657	0.0097742	0.46324	422	4	1.37
TBC1D17	19	4	0.011104	0.037002	0.947418	780	4	1.179	4	0.0096229	0.032402	1	622	3	1.8224	4	0.022889	0.072186	1	1305	3	1.4278	4	0.0027868	0.0098456	0.46324	423	4	1.5649
SLC25A35	17	4	0.20591	0.37323	1	6397	2	0.51415	4	0.51561	0.66272	1	11985	1	0.063531	4	0.15746	0.31381	1	5445	2	0.52073	4	0.0027877	0.0098486	0.46324	424	4	0.89375
ATOH1	12	4	0.1506	0.30285	1	5147	1	0.16676	4	0.17422	0.34047	1	5799	3	1.188	4	0.7304	0.76475	1	14765	1	0.42681	4	0.0027967	0.0098806	0.46324	425	4	1.1067
CHST8	19	4	0.0084732	0.028762	0.907662	632	2	-0.46934	4	0.044342	0.11716	1	2052	2	0.43509	4	0.031142	0.090561	1	1640	2	-0.90727	4	0.0027972	0.0098815	0.46324	426	1	-1.274
NOVA2	19	4	0.0014436	0.0052077	0.561376	186	4	1.975	4	0.21727	0.38478	1	6697	2	0.99382	4	0.37426	0.52872	1	9660	2	-0.11984	4	0.002798	0.0098835	0.46324	427	4	1.2636
MAN2B1	19	4	0.56633	0.68775	1	12343	1	0.069263	4	0.31523	0.47537	1	8646	2	0.99474	4	0.06288	0.15133	1	2759	3	1.0627	4	0.0028032	0.0099032	0.46324	428	4	1.0976
C17orf100	17	4	0.1384	0.28309	1	4848	2	0.83822	4	0.056707	0.14045	1	2465	3	1.3092	4	0.23583	0.39924	1	7061	2	0.65429	4	0.0028104	0.0099318	0.463497	429	3	1.392
KLC2	11	4	0.7772	0.79496	1	15455	1	0.68527	4	0.48888	0.6376	1	11546	2	0.29113	4	0.018159	0.058389	1	1073	3	1.4349	4	0.0028362	0.010035	0.466678	430	3	1.1904
SCN1B	19	4	0.40634	0.55973	1	9969	2	0.87662	4	0.11085	0.23713	1	4092	2	1.2081	4	0.0075191	0.025657	0.979249	521	3	1.8883	4	0.0028508	0.01008	0.466678	431	3	1.7163
NBPF14	1	4	0.77423	0.79302	1	15401	1	0.38706	4	0.032558	0.094206	1	1634	3	1.4623	4	0.1888	0.35538	1	6187	2	0.75446	4	0.0028544	0.010091	0.466678	432	3	1.2355
TUBA3C	13	4	0.27269	0.43512	1	7653	2	0.4789	4	0.052586	0.13267	1	2335	3	1.4073	4	0.04424	0.1162	1	2123	3	1.3884	4	0.0028549	0.010093	0.466678	433	4	1.341
TSPYL6	2	4	0.25069	0.41458	1	7242	2	0.54638	4	0.096592	0.21235	1	3693	3	1.1496	4	0.19939	0.36529	1	6370	2	0.55352	4	0.0028813	0.010187	0.469051	434	3	1.2324
DOK3	5	4	0.12525	0.26118	1	4492	2	0.81195	4	0.17227	0.33738	1	5759	2	0.88741	4	0.1187	0.25008	1	4302	3	0.91576	4	0.0028824	0.010191	0.469051	435	4	1.1662
LRRC8B	1	4	0.43867	0.59014	1	10477	2	0.70267	4	0.42555	0.57816	1	10506	2	0.89089	4	0.072978	0.16992	1	3083	3	1.0761	4	0.002906	0.010274	0.47023	436	4	1.0023
CLDN7	17	4	0.021764	0.068982	1	1241	3	1.3632	4	0.0043289	0.015117	0.902956	330	3	1.6422	4	0.017708	0.057067	1	1049	3	1.411	4	0.0029083	0.010282	0.47023	437	3	1.4408
BARX2	11	4	0.16242	0.32186	1	5452	2	0.43675	4	0.12887	0.26727	1	4582	3	1.1556	4	0.016811	0.054386	1	1017	4	1.4629	4	0.0029145	0.010304	0.47023	438	4	1.294
ANO9	11	4	0.18253	0.35155	1	5936	2	0.66949	4	0.83449	0.83782	1	16690	1	-0.60609	4	0.031369	0.091002	1	1649	3	1.3143	4	0.0029167	0.01031	0.47023	439	4	0.81557
TMED8	14	4	0.0084235	0.028599	0.907662	629	4	1.7527	4	0.24209	0.40761	1	7172	2	0.76676	4	0.12784	0.26534	1	4577	2	0.64562	4	0.0030004	0.01062	0.482657	440	3	1.4036
FCGRT	19	4	0.0087144	0.029556	0.907662	646	3	2.0331	4	0.626	0.71447	1	13379	1	0.10983	4	0.15423	0.30854	1	5352	2	1.0705	4	0.0030042	0.01063	0.482657	441	3	1.6084
TEAD1	11	4	0.040194	0.10888	1	1944	3	1.147	4	0.69969	0.75022	1	14415	1	0.079965	4	0.025543	0.07931	1	1419	3	1.1617	4	0.0030185	0.010668	0.482712	442	3	1.3033
AKT1S1	19	4	0.0011492	0.0041435	0.543815	153	3	2.3789	4	0.050247	0.12827	1	2258	3	1.0893	4	0.0048368	0.016845	0.891623	374	3	1.8053	4	0.0030236	0.010679	0.482712	443	3	1.9288
WFDC5	20	4	0.032042	0.09286	1	1652	3	1.4104	4	0.44505	0.59637	1	10821	1	0.61231	4	0.28324	0.44348	1	7979	2	0.1366	4	0.0030515	0.010783	0.486292	444	3	1.2167
KIR2DL3	19	4	0.040285	0.10907	1	1947	3	1.2495	4	0.13675	0.28047	1	4791	2	0.86157	4	0.010692	0.035737	1	707	1	-0.7234	4	0.0030879	0.0109	0.489381	445	2	0.46887
LIM2	19	4	0.020785	0.066112	1	1193	2	0.96985	4	0.037917	0.10472	1	1816	2	0.53871	4	0.1241	0.2591	1	4478	2	0.53956	4	0.0031165	0.01101	0.492398	446	3	0.96428
ZFP14	19	4	0.039826	0.10815	1	1928	2	1.0292	4	0.069221	0.16373	1	2891	3	1.3832	4	0.70687	0.75149	1	14381	1	0.33991	4	0.0031188	0.011016	0.492398	447	3	1.1584
RANGAP1	22	4	0.19681	0.36481	1	6226	2	0.53536	4	0.10748	0.23134	1	3998	3	1.2905	4	0.013839	0.04536	1	869	3	1.6254	4	0.0031304	0.011049	0.492777	448	3	1.4795
CDK12	17	4	0.090375	0.20122	1	3559	2	0.68268	4	0.04637	0.12103	1	2128	1	0.51701	4	0.0017662	0.0063246	0.669541	189	4	1.4975	4	0.0031421	0.011087	0.493374	449	4	1.6145
CNOT3	19	4	0.044896	0.11796	1	2088	2	-0.21835	4	0.0046572	0.016232	0.923749	345	2	-2.3209	4	0.020593	0.065571	1	1195	1	-1.3437	4	0.0031768	0.011208	0.497019	450	1	-1.4353
MYO15A	17	4	0.036538	0.10173	1	1803	3	1.4281	4	0.67163	0.7359	1	14012	1	0.31493	4	0.075499	0.17448	1	3154	3	1.3697	4	0.0031902	0.011257	0.497019	451	3	1.5053
MAST3	19	4	0.49349	0.64177	1	11344	2	0.54819	4	0.015107	0.049206	1	909	2	0.67632	4	0.02462	0.07716	1	1386	3	1.4748	4	0.0032002	0.011291	0.497019	452	2	0.12994
NAPA	19	4	0.014023	0.045908	1	908	3	1.5627	4	0.073834	0.17203	1	3017	2	0.80049	4	0.032778	0.093791	1	1699	2	0.87612	4	0.0032038	0.011304	0.497019	453	3	1.1236
CEP152	15	4	0.12788	0.26556	1	4571	2	0.9953	4	0.32758	0.48696	1	8929	2	0.86033	4	0.49576	0.64375	1	11590	2	0.67256	4	0.0032138	0.011342	0.497019	454	3	1.2509
TPSAB1	16	4	0.10004	0.21827	1	3832	1	0.44663	4	0.47625	0.62583	1	11321	1	0.48203	4	0.14273	0.29003	1	4994	3	0.88503	4	0.0032153	0.011347	0.497019	455	4	0.93824
RSPH6A	19	4	0.08905	0.19893	1	3526	2	0.69293	4	0.0010261	0.0037059	0.569005	130	1	-0.88239	4	0.0029662	0.010495	0.81145	257	1	-2.8209	4	0.0032229	0.011376	0.497019	456	1	-1.2789
PSENEN	19	4	0.00059018	0.0021612	0.423099	102	4	1.6419	4	0.016767	0.054258	1	997	3	1.8398	4	0.06444	0.15429	1	2814	3	1.2045	4	0.0032469	0.011448	0.497019	457	4	1.6227
IER5L	9	4	0.88165	0.88133	1	17494	0	0.52113	4	0.14202	0.28904	1	4958	3	1.0058	4	0.10573	0.22792	1	3967	3	1.0811	4	0.0032508	0.011465	0.497019	458	3	1.2175
ZNF226	19	4	0.030661	0.090125	1	1597	2	0.62921	4	0.010326	0.034581	1	667	4	1.4797	4	0.12956	0.2682	1	4629	3	0.93745	4	0.0032522	0.011471	0.497019	459	4	1.432
MC5R	18	4	0.49473	0.64292	1	11367	1	-0.088162	4	0.31564	0.47577	1	8654	2	0.77588	4	0.062799	0.15117	1	2758	3	1.0265	4	0.00326	0.01149	0.497019	460	3	1.146
DDN	12	4	0.34838	0.50556	1	9083	1	0.084944	4	0.10164	0.2212	1	3817	3	1.1618	4	0.022936	0.072296	1	1307	4	0.88701	4	0.0032602	0.01149	0.497019	461	4	1.0897
KLF17	1	4	0.74648	0.77578	1	14914	1	0.50801	4	0.87507	0.87471	1	17447	0	0.46923	4	0.11576	0.24508	1	4223	3	0.97992	4	0.0032777	0.011547	0.498417	462	4	0.90825
NLGN3	X	4	0.29168	0.45263	1	8014	2	0.826	4	0.024319	0.0763	1	1342	4	1.318	4	0.50245	0.65008	1	11694	2	0.49004	4	0.0033004	0.011627	0.500263	463	4	1.28
IGFLR1	19	4	0.0012593	0.0045574	0.555566	165	2	1.8454	4	0.021154	0.067173	1	1199	3	1.7499	4	0.00075445	0.0027332	0.51561	104	3	1.9857	4	0.0033056	0.011644	0.500263	464	4	1.3782
SPAST	2	4	0.63993	0.71964	1	13330	1	-0.28886	4	0.13643	0.27992	1	4780	3	1.1593	4	0.051425	0.12978	1	2389	3	1.3482	4	0.0033166	0.011686	0.500263	465	4	0.90794
UQCRHL	1	4	0.016186	0.052532	1	997	4	1.4785	4	0.51693	0.66396	1	12006	2	0.67283	4	0.23077	0.39446	1	6955	2	0.11665	4	0.0033181	0.01169	0.500263	466	4	1.1444
CNIH2	11	4	0.0065984	0.022674	0.856966	530	4	1.2252	4	0.82494	0.83008	1	16502	1	0.23052	4	0.4078	0.56044	1	10177	1	0.12945	4	0.0033277	0.011719	0.500441	467	4	0.95947
HS2ST1	1	4	0.081511	0.18567	1	3291	3	1.1338	4	0.24018	0.40587	1	7134	2	0.99328	4	0.33324	0.49046	1	8924	2	0.72148	4	0.0033611	0.01183	0.501702	468	4	1.2859
LGALS9C	17	4	0.26727	0.43002	1	7546	2	0.63149	4	0.85113	0.85211	1	16992	1	0.25073	4	0.091226	0.20243	1	3561	2	0.77031	4	0.0033706	0.011865	0.501702	469	2	0.37656
CBFA2T2	20	4	0.63805	0.71872	1	13306	1	0.72902	4	0.42228	0.57508	1	10453	2	0.34952	4	0.0043636	0.015233	0.861844	349	3	1.894	4	0.003385	0.011909	0.501702	470	4	1.1889
RCVRN	17	4	0.0097128	0.032694	0.917399	711	3	2.0637	4	0.026863	0.082851	1	1444	3	1.6161	4	0.10116	0.21998	1	3850	2	0.94987	4	0.0033853	0.011909	0.501702	471	4	1.8237
KRTAP19-2	21	4	0.11752	0.24828	1	4286	3	1.051	4	0.14194	0.28891	1	4952	1	0.34762	4	0.46296	0.61268	1	11068	2	0.68591	4	0.0033917	0.011931	0.501702	472	4	0.99211
SNRPA	19	4	0.0025316	0.008995	0.679887	266	4	1.9476	4	0.039134	0.10712	1	1862	3	1.8135	4	0.30479	0.46368	1	8391	2	0.95406	4	0.0033986	0.01195	0.501702	473	3	1.7825
LRRTM2	5	4	0.9151	0.915	1	18196	0	0.043557	4	0.019824	0.063273	1	1137	4	0.87919	4	0.25463	0.41674	1	7411	2	0.64739	4	0.0034015	0.011956	0.501702	474	4	0.74454
ZNF551	19	4	0.44094	0.59228	1	10510	1	0.14326	4	0.10782	0.23192	1	4008	2	0.6607	4	0.020358	0.064864	1	1181	3	1.568	4	0.0034037	0.011962	0.501702	475	3	0.84459
ZNF229	19	4	0.011102	0.036996	0.947418	779	3	1.4203	4	0.49189	0.6404	1	11586	1	0.50806	4	0.00026609	0.000968	0.34237	55	3	2.3174	4	0.0034074	0.011973	0.501702	476	3	1.42
KIAA1919	22	4	0.34626	0.50359	1	9031	2	0.78225	4	0.11519	0.24446	1	4202	3	1.2282	4	0.87678	0.87641	1	17474	0	-0.52074	4	0.0034324	0.012062	0.502767	477	4	0.82643
ZNF446	19	4	0.022067	0.069842	1	1255	2	0.7537	4	0.0079219	0.026982	0.997259	538	4	1.5118	4	0.0074357	0.025387	0.977997	516	3	1.8438	4	0.0034333	0.012065	0.502767	478	3	1.3084
ZNF558	19	4	0.32854	0.48722	1	8709	1	0.50499	4	0.9117	0.91161	1	18173	0	-0.26499	4	0.098139	0.21467	1	3770	3	1.0255	4	0.0034354	0.012073	0.502767	479	4	0.72912
NAA38	17	4	0.0039627	0.013893	0.777107	357	3	1.9209	4	0.0010499	0.0038018	0.570674	133	3	1.8813	4	0.49448	0.64252	1	11565	1	-1.7604	4	0.0034889	0.012265	0.507955	481	3	0.37164
CTDP1	18	4	0.0034096	0.011976	0.740144	324	2	0.8749	4	3.4028e-05	0.00012971	0.144939	18	4	2.533	4	0.022391	0.070739	1	1280	2	0.050326	4	0.003489	0.012266	0.507955	482	2	0.81459
USP14	18	4	0.63896	0.71916	1	13318	1	0.46838	4	0.10928	0.2344	1	4045	3	1.0766	4	0.051941	0.13074	1	2409	3	0.88761	4	0.0034907	0.012273	0.507955	483	4	1.2846
CST4	20	4	0.14798	0.29864	1	5070	2	0.99027	4	0.41249	0.56588	1	10303	2	0.48814	4	0.026882	0.082008	1	1478	3	1.2738	4	0.0035004	0.012309	0.508376	484	3	1.1512
GSTA3	6	4	0.056498	0.1398	1	2501	3	0.89395	4	0.046329	0.12095	1	2125	3	1.0985	4	0.42636	0.57805	1	10476	2	0.077861	4	0.0035143	0.012357	0.50878	485	3	1.1825
USP29	19	4	0.0095292	0.032109	0.916741	695	2	-1.585	4	0.67152	0.73585	1	14008	1	-0.4132	4	0.10635	0.229	1	3983	2	-0.80092	4	0.0035265	0.012394	0.50878	486	2	-1.0422
ZNF7	8	4	0.39639	0.55029	1	9828	2	0.61253	4	0.1104	0.23635	1	4080	3	1.031	4	0.28362	0.44386	1	7990	2	0.62408	4	0.0035269	0.012394	0.50878	487	4	1.1229
NUMBL	19	4	0.12171	0.25529	1	4400	2	0.42759	4	0.0073911	0.025229	0.990336	504	3	2.1399	4	0.017139	0.05536	1	1028	2	1.2023	4	0.0035387	0.012432	0.509276	488	4	1.1224
CCNH	5	4	0.0097306	0.032745	0.917399	713	3	2.0139	4	0.7115	0.75651	1	14584	1	0.72799	4	0.47585	0.62504	1	11268	1	0.587	4	0.0035682	0.012521	0.511883	489	4	1.064
MICU2	13	4	0.43424	0.58599	1	10415	2	0.77212	4	0.33909	0.49752	1	9164	2	0.78814	4	0.17108	0.33553	1	5777	3	0.78318	4	0.0035799	0.012557	0.512331	490	4	0.92172
NKPD1	19	4	3.1748e-05	0.00012331	0.124705	19	4	2.2595	4	0.045923	0.12018	1	2106	2	1.4087	4	0.070847	0.16606	1	3022	1	-0.42652	4	0.0035957	0.012618	0.513121	491	3	1.4429
WIZ	19	4	0.75242	0.77936	1	15020	1	0.30069	4	0.0056937	0.019721	0.962383	404	3	2.0972	4	0.02049	0.065262	1	1189	3	1.3222	4	0.0035985	0.012628	0.513121	492	3	1.6672
PRPF39	14	4	0.097804	0.21437	1	3771	2	0.55764	4	0.17952	0.34873	1	5943	3	0.816	4	0.20774	0.37306	1	6546	2	0.9248	4	0.0036475	0.012804	0.519253	493	3	1.231
ABHD13	13	4	0.50786	0.65528	1	11584	2	0.73277	4	0.35746	0.51453	1	9504	2	0.67962	4	0.38623	0.53997	1	9846	2	0.60651	4	0.0036761	0.012899	0.521263	494	4	0.85049
FAM21C	3	4	0.35631	0.51288	1	9223	2	0.60628	4	0.38346	0.53865	1	9860	1	0.13118	4	0.03932	0.10668	1	1953	3	1.2031	4	0.0036785	0.012906	0.521263	495	4	0.89622
WDPCP	2	4	0.38509	0.53967	1	9643	2	0.91576	4	0.14645	0.29622	1	5073	3	1.0063	4	0.09396	0.20729	1	3642	3	0.86626	4	0.0036928	0.01296	0.522401	496	4	0.98313
PGAM1	10	4	0.34597	0.50332	1	9026	2	0.061179	4	0.057036	0.14105	1	2477	3	1.2208	4	0.012019	0.039778	1	778	4	1.2074	4	0.0037049	0.013004	0.523139	497	4	1.0887
PITPNM3	17	4	0.013776	0.045157	1	898	2	-0.60206	4	0.35062	0.50823	1	9409	2	0.4209	4	0.0042057	0.014715	0.861844	338	3	1.6783	4	0.0037319	0.01309	0.525098	498	2	0.90438
ZNF83	19	4	0.10198	0.22168	1	3886	2	1.2619	4	0.092234	0.2047	1	3584	2	0.90101	4	0.0070007	0.023985	0.97617	488	2	1.1713	4	0.003736	0.013105	0.525098	499	3	1.7206
ZSWIM4	19	4	0.15637	0.3121	1	5300	3	0.80203	4	0.5661	0.6891	1	12641	1	0.55137	4	0.07858	0.18003	1	3245	3	0.95793	4	0.0037577	0.013171	0.526691	500	3	1.1092
OR5AK2	11	4	0.8462	0.84756	1	16738	1	-0.2354	4	0.028949	0.087092	1	1519	2	1.1814	4	0.40904	0.56162	1	10195	1	0.38585	4	0.0037669	0.013211	0.527238	501	4	0.83334
ISM2	14	4	0.33076	0.48927	1	8750	2	0.55026	4	0.015439	0.050256	1	929	3	1.386	4	0.39295	0.54631	1	9946	1	0.038632	4	0.0038102	0.013359	0.531421	502	3	1.0511
SLC35D1	1	4	0.079637	0.18228	1	3227	2	-2.1753	4	0.021794	0.069071	1	1231	4	1.8401	4	0.19493	0.36118	1	6287	2	0.44193	4	0.0038172	0.013391	0.531421	503	2	0.29059
SHC1	1	4	0.029075	0.087006	1	1531	3	1.6425	4	0.50113	0.64905	1	11743	1	0.23256	4	0.15424	0.30856	1	5353	3	0.88506	4	0.0038182	0.013395	0.531421	504	4	1.2261
CXCL16	17	4	0.69671	0.7477	1	14131	1	0.30759	4	0.061272	0.14895	1	2629	3	1.4218	4	0.017934	0.057736	1	1065	4	1.2581	4	0.0038511	0.013513	0.535053	505	4	1.3112
HTR7	10	4	0.078269	0.17982	1	3183	3	1.126	4	0.15037	0.30254	1	5188	2	0.83917	4	0.33426	0.49138	1	8950	2	0.79525	4	0.0038619	0.013548	0.535363	506	4	1.3319
BAX	19	4	0.010065	0.033785	0.922013	732	3	1.9976	4	0.059691	0.14601	1	2578	2	0.52994	4	0.049252	0.12564	1	2295	3	1.3683	4	0.0039073	0.013682	0.539594	507	3	1.1434
INPP5E	9	4	0.063913	0.15367	1	2740	3	1.2977	4	0.010125	0.03397	1	653	3	2.0899	4	0.58941	0.69477	1	12780	1	-0.010001	4	0.0039468	0.013836	0.544603	508	4	1.4595
C9orf117	9	4	0.6961	0.74737	1	14118	1	0.16999	4	0.0066412	0.022818	0.965845	472	4	1.7588	4	0.51869	0.66555	1	11960	2	0.2719	4	0.0039552	0.013871	0.544912	509	4	1.0122
C19orf54	19	4	0.023075	0.072702	1	1313	2	1.2148	4	0.4109	0.56443	1	10279	2	1.0512	4	0.002331	0.0083157	0.7816	213	3	2.1093	4	0.0039725	0.013931	0.545932	510	4	1.7071
PSMB2	1	4	0.00018023	0.00066773	0.262003	51	2	1.6299	4	0.014222	0.04652	1	868	3	1.8849	4	0.22531	0.38937	1	6873	1	-0.79405	4	0.0039786	0.013951	0.545932	511	2	0.81118
FGFBP2	4	4	0.03769	0.10397	1	1839	3	1.5874	4	0.039872	0.10854	1	1897	2	0.47852	4	0.050671	0.12834	1	2356	2	-1.2939	4	0.0040264	0.014111	0.55112	512	2	-0.218
SLC4A11	20	4	0.9701	0.97013	1	19318	0	0.043594	4	0.13057	0.27009	1	4631	3	1.0431	4	0.17471	0.34121	1	5886	3	0.64465	4	0.0040778	0.014271	0.555231	513	4	0.72205
ELP6	3	4	0.039718	0.10796	1	1922	3	1.0077	4	0.75622	0.78235	1	15315	1	0.13319	4	0.0079195	0.026973	0.990945	539	3	1.5367	4	0.0041208	0.01442	0.559912	514	3	1.3132
AIP	11	4	0.64389	0.72152	1	13375	1	0.31088	4	0.12775	0.26543	1	4548	3	1.078	4	0.5379	0.67395	1	12203	1	0.48275	4	0.0041436	0.014499	0.560356	515	4	0.87458
CBWD6	9	4	0.078633	0.18048	1	3197	2	0.68965	4	0.11528	0.24463	1	4203	3	1.2579	4	0.01965	0.062791	1	1142	3	1.5719	4	0.0041484	0.014515	0.560356	516	3	1.4634
OR52N2	11	4	0.52321	0.66987	1	11830	2	0.37737	4	0.37128	0.5273	1	9688	2	0.98097	4	0.41855	0.5706	1	10350	2	0.64557	4	0.0041829	0.01464	0.563552	517	4	0.9203
MAG	19	4	0.035814	0.10032	1	1787	3	1.567	4	0.16545	0.32663	1	5595	2	0.82489	4	0.090779	0.20164	1	3552	3	1.1955	4	0.0041961	0.014683	0.563629	518	3	1.6175
PKMYT1	16	4	0.085945	0.1934	1	3421	1	0.22447	4	0.070743	0.16648	1	2938	3	1.4684	4	0.083431	0.18867	1	3360	2	0.57733	4	0.0042107	0.014732	0.564182	519	3	1.2596
CCDC30	1	4	0.35913	0.51555	1	9268	2	0.32342	4	0.2924	0.45411	1	8161	1	0.59649	4	0.4471	0.59759	1	10801	2	0.18826	4	0.0042216	0.014773	0.564182	520	4	0.80839
SLC45A1	1	4	0.10812	0.23228	1	4056	3	0.989	4	0.4993	0.64734	1	11712	2	0.49729	4	0.11065	0.23643	1	4097	2	0.51208	4	0.004266	0.014914	0.564182	521	4	1.0229
TFPT	19	4	0.10914	0.23403	1	4083	2	1.0377	4	0.0069984	0.023974	0.977868	490	4	1.9658	4	0.25612	0.41815	1	7435	2	0.45212	4	0.004274	0.01494	0.564182	522	3	1.3395
CHRDL2	11	4	0.077792	0.17897	1	3169	3	1.2486	4	0.37433	0.53016	1	9724	1	0.51662	4	0.90315	0.90294	1	18002	0	-0.13814	4	0.0042785	0.014957	0.564182	523	4	0.90476
GPI	19	4	0.0059497	0.020578	0.838814	491	4	2.0676	4	0.0024566	0.0087627	0.762998	227	1	0.48445	4	0.01019	0.034157	1	669	3	1.6002	4	0.0042867	0.014985	0.564182	524	3	1.3082
POLR2G	11	4	0.030763	0.090332	1	1601	1	-3.0828	4	0.056408	0.13989	1	2460	1	0.27141	4	0.003061	0.01081	0.813733	266	1	-1.9809	4	0.0042941	0.01501	0.564182	525	1	-2.0072
CD320	19	4	0.49987	0.6478	1	11454	2	0.6872	4	0.44209	0.59361	1	10777	2	0.69005	4	0.1595	0.31708	1	5506	1	0.085157	4	0.0043053	0.015042	0.564182	526	4	0.84444
LOC388436	10	4	0.001476	0.005314	0.561376	190	2	0.89278	4	0.084935	0.19182	1	3349	2	0.9677	4	0.32271	0.48053	1	8731	2	0.83872	4	0.004307	0.015046	0.564182	527	3	1.4468
CD79A	19	4	0.062549	0.15111	1	2696	2	1.035	4	0.014649	0.047838	1	888	3	1.6718	4	0.0055288	0.019147	0.925754	410	3	1.6215	4	0.0043111	0.015056	0.564182	528	3	1.5935
ITFG3	18	4	0.35155	0.50844	1	9141	2	0.85849	4	0.083352	0.18904	1	3306	1	0.47611	4	0.32488	0.48262	1	8778	2	0.68395	4	0.0043134	0.015062	0.564182	529	4	1.1892
MAMSTR	19	4	0.24059	0.40527	1	7049	2	0.84683	4	0.011871	0.039331	1	752	3	1.8035	4	0.13211	0.27247	1	4697	2	0.89726	4	0.0043276	0.015113	0.564182	531	3	1.493
FUZ	19	4	0.016137	0.052384	1	992	2	0.52917	4	0.0095786	0.032274	1	620	4	1.6849	4	0.19678	0.36291	1	6331	2	0.54362	4	0.0043295	0.015119	0.564182	532	4	1.1146
KCNJ2	17	4	0.011365	0.037807	0.952781	791	4	1.3549	4	0.10346	0.22431	1	3881	2	1.1967	4	0.57319	0.68801	1	12608	1	0.19905	4	0.0043563	0.015213	0.565736	533	3	1.3164
PPOX	1	4	0.064946	0.15563	1	2772	3	1.0245	4	0.63138	0.71686	1	13450	1	0.47455	4	0.061203	0.14817	1	2708	3	1.031	4	0.0044267	0.015441	0.571147	534	4	1.1731
PLEKHA4	19	4	0.31437	0.47388	1	8431	2	-1.324	4	0.010374	0.034723	1	668	2	-1.1152	4	0.034407	0.097047	1	1766	3	1.2048	4	0.0044359	0.015477	0.571147	535	2	-0.09726
PIK3CD	1	4	0.46917	0.61894	1	10943	2	0.73832	4	0.90795	0.9078	1	18098	0	0.34081	4	0.09753	0.21362	1	3750	3	0.87376	4	0.0044377	0.015481	0.571147	536	4	1.0196
DEDD2	19	4	0.068807	0.16276	1	2892	2	-0.07464	4	0.011731	0.038878	1	745	2	1.4047	4	0.011886	0.039376	1	776	2	1.0661	4	0.0044461	0.015504	0.571147	537	2	0.72179
PPP5C	19	4	0.014793	0.048248	1	936	3	1.7518	4	0.29974	0.461	1	8331	2	0.68315	4	0.021072	0.066931	1	1219	3	1.4722	4	0.0045319	0.015796	0.578587	538	4	1.0543
EID2	19	4	0.0024695	0.0088006	0.671073	263	3	2.1561	4	0.0038455	0.013495	0.883265	301	3	1.6878	4	4.8976e-05	0.00019025	0.136736	27	2	1.2345	4	0.004533	0.015802	0.578587	539	3	1.5936
ANK3	10	4	0.88663	0.88627	1	17585	0	0.35304	4	0.75855	0.78375	1	15360	1	0.76415	4	0.21985	0.38438	1	6758	2	0.8533	4	0.0045385	0.015821	0.578587	540	4	0.71251
TMEM171	5	4	0.034862	0.098427	1	1751	2	0.86494	4	0.0099525	0.033432	1	641	3	1.9965	4	0.03562	0.099416	1	1817	3	1.0447	4	0.004571	0.015935	0.581688	541	3	1.6913
ZNF852	3	4	0.67994	0.73896	1	13900	1	0.56107	4	0.0029451	0.010411	0.802341	256	4	2.4481	4	0.07796	0.17893	1	3223	3	1.0807	4	0.0045858	0.015988	0.582287	542	3	1.4977
XPO4	13	4	0.17332	0.33901	1	5712	2	0.79103	4	0.28833	0.45033	1	8071	2	0.63222	4	0.063371	0.15223	1	2776	3	1.2512	4	0.0045907	0.016009	0.582287	543	3	1.1176
CD302	2	4	0.88808	0.88773	1	17604	0	0.25831	4	0.30328	0.46432	1	8395	2	0.83553	4	0.1839	0.35086	1	6074	2	0.90996	4	0.0046389	0.016171	0.586656	544	3	1.0461
ZNF8	19	4	0.020763	0.066047	1	1191	3	1.8345	4	0.061938	0.15021	1	2654	3	1.4754	4	0.20019	0.36605	1	6387	2	0.17578	4	0.0046478	0.016204	0.586656	545	3	1.6506
MAPK14	6	4	0.59472	0.69951	1	12712	1	0.47304	4	0.14968	0.30144	1	5167	3	1.0025	4	0.3817	0.5357	1	9777	2	0.24532	4	0.004659	0.016241	0.586656	546	4	0.78496
CAPN6	X	4	0.46718	0.61706	1	10909	2	0.74336	4	0.089584	0.20001	1	3500	3	1.1635	4	0.031073	0.090425	1	1637	3	1.4504	4	0.0046606	0.016246	0.586656	547	3	1.1199
NOP10	15	4	0.80231	0.81254	1	15923	1	-0.16806	4	0.38129	0.53663	1	9835	2	0.90762	4	0.16437	0.32486	1	5624	3	0.81456	4	0.0046771	0.016303	0.587681	548	4	0.80387
SPDYE4	17	4	0.25358	0.41731	1	7294	2	0.56161	4	0.26892	0.43241	1	7688	2	0.69974	4	0.22924	0.39302	1	6936	2	0.42847	4	0.0046924	0.016353	0.588418	549	4	0.96772
ARPC4	3	4	0.24121	0.40586	1	7069	1	0.45746	4	0.44581	0.59703	1	10834	2	0.667	4	0.052056	0.13097	1	2414	3	1.2645	4	0.0047317	0.016491	0.592336	550	4	0.74699
CSF1	1	4	0.43924	0.59069	1	10481	2	0.92864	4	0.0097137	0.032697	1	627	3	1.6707	4	0.017909	0.057658	1	1061	4	1.3662	4	0.0047565	0.016587	0.594704	551	3	1.637
CCER2	19	4	0.0013806	0.0049768	0.561376	176	4	1.6766	4	0.0062552	0.021544	0.962383	444	3	1.1491	4	0.32015	0.47811	1	8684	2	0.67114	4	0.0047684	0.01662	0.594843	552	3	1.4559
XRCC6	22	4	0.6222	0.71148	1	13106	1	0.4581	4	0.076833	0.17745	1	3109	3	1.3679	4	0.35215	0.50801	1	9334	2	0.65082	4	0.0047786	0.01666	0.595211	553	3	1.2251
LILRA5	19	4	0.0022971	0.0081995	0.660495	247	3	2.1778	4	0.023438	0.073799	1	1307	1	-0.00047111	4	0.0026401	0.0093475	0.809638	228	3	1.9371	4	0.0047903	0.016695	0.595385	554	4	1.3954
KLK12	19	4	0.1208	0.25377	1	4372	1	0.16211	4	0.011867	0.039318	1	751	4	1.9451	4	0.016391	0.053148	1	996	3	1.6213	4	0.0048109	0.016763	0.596749	555	3	1.4644
ZNF507	19	4	0.019745	0.063051	1	1139	2	1.0812	4	0.067387	0.16039	1	2836	3	1.3675	4	0.27312	0.43408	1	7771	2	0.3821	4	0.0048297	0.016824	0.597864	556	3	1.4717
SMARCB1	22	4	0.12111	0.25429	1	4380	2	0.55992	4	0.019453	0.062211	1	1113	3	1.688	4	0.04258	0.11302	1	2074	3	1.4472	4	0.0048606	0.016929	0.600529	557	3	1.2764
CTU1	19	4	0.36171	0.5179	1	9305	1	-0.075568	4	0.038513	0.10589	1	1842	2	1.1891	4	0.0027525	0.0097275	0.809638	238	3	1.238	4	0.0048718	0.016971	0.600971	558	4	1.2226
MRPS6	21	4	0.12496	0.2607	1	4483	1	0.26776	4	0.0014276	0.0051511	0.636079	160	2	1.546	4	0.001689	0.006047	0.648752	185	2	-0.8466	4	0.0048908	0.017044	0.602507	559	2	0.047811
NT5M	17	4	0.13206	0.27253	1	4670	2	0.59602	4	0.13024	0.26959	1	4623	3	0.98292	4	0.033984	0.09619	1	1749	3	1.3168	4	0.0049281	0.017166	0.60402	560	4	1.2412
PRSS37	7	4	0.64588	0.72244	1	13405	1	0.38915	4	0.014648	0.047834	1	887	4	1.1535	4	0.60699	0.70241	1	12984	1	0.10356	4	0.0049341	0.017189	0.60402	561	4	0.84344
SLC28A3	9	4	0.4473	0.5982	1	10598	2	0.56236	4	0.57528	0.69286	1	12751	1	-0.50992	4	0.13936	0.28455	1	4896	3	0.66324	4	0.004944	0.01723	0.60402	562	4	0.74897
FZD1	7	4	0.062563	0.15113	1	2697	3	1.1244	4	0.077401	0.17845	1	3128	3	1.4342	4	0.43126	0.5827	1	10550	2	0.49759	4	0.0049569	0.017272	0.60402	563	3	1.2109
PANX1	11	4	0.19702	0.365	1	6231	2	0.94072	4	0.1547	0.30944	1	5300	2	0.87429	4	0.75834	0.78171	1	15218	1	0.12694	4	0.004959	0.017278	0.60402	564	4	1.0431
FZD8	10	4	0.89295	0.89267	1	17711	0	-0.085223	4	0.44161	0.59318	1	10768	2	0.40972	4	0.068407	0.16164	1	2935	3	1.1064	4	0.0049719	0.017312	0.60402	565	4	0.71302
ZNF444	19	4	0.0137	0.044926	1	892	3	1.5503	4	0.019054	0.06102	1	1091	2	0.84375	4	0.10099	0.21968	1	3843	1	-0.079607	4	0.0049776	0.017327	0.60402	566	3	1.1018
LHFPL5	6	4	0.84445	0.84604	1	16701	1	0.42195	4	0.072108	0.16892	1	2973	3	1.1654	4	0.86312	0.86304	1	17187	1	-0.35455	4	0.0049889	0.017359	0.604072	567	4	0.65026
CHRNE	17	4	0.11505	0.24411	1	4223	2	1.1946	4	0.032412	0.09391	1	1631	2	-0.095803	4	0.015802	0.051362	1	971	4	1.0505	4	0.0050011	0.017396	0.604328	568	3	1.1694
BANK1	4	4	0.35456	0.51123	1	9197	2	0.65683	4	0.0050739	0.017642	0.944028	370	4	1.5078	4	0.4335	0.58482	1	10589	1	0.087944	4	0.005019	0.017453	0.604753	569	4	1.0453
CTSO	4	4	0.12841	0.26642	1	4585	2	-0.21514	4	0.26333	0.42729	1	7574	2	0.84189	4	0.18424	0.35118	1	6083	2	0.86188	4	0.0050234	0.017468	0.604753	570	2	0.75246
IKBKG	X	4	0.068459	0.1621	1	2881	2	1.0714	4	0.0082601	0.028076	1	560	4	1.7528	4	0.031152	0.090585	1	1641	3	1.3064	4	0.0050554	0.017579	0.607524	571	3	1.824
SRM	1	4	0.0045083	0.01573	0.80309	392	3	2.2161	4	0.063763	0.15363	1	2722	2	0.058991	4	0.44943	0.59981	1	10840	2	0.74817	4	0.0050724	0.017635	0.608435	572	2	1.0338
DHX8	17	4	0.00023995	0.00087546	0.273953	63	4	2.4213	4	0.26724	0.43087	1	7649	2	0.80879	4	0.32101	0.47895	1	8702	2	-2.5141	4	0.0051082	0.017757	0.610682	573	2	0.53706
RBMXL3	X	4	0.083891	0.18981	1	3355	1	0.31475	4	0.90025	0.90004	1	17950	0	0.13352	4	0.36662	0.5216	1	9549	2	0.20221	4	0.0051234	0.017809	0.610682	574	4	0.64967
ZNF771	16	4	0.24084	0.4055	1	7059	2	0.96867	4	0.15136	0.30415	1	5216	2	0.88154	4	0.15426	0.30859	1	5354	2	1.1805	4	0.0051244	0.01781	0.610682	575	3	1.2897
IGFL4	19	4	0.062017	0.15011	1	2672	3	1.4697	4	0.48471	0.63372	1	11462	2	0.79327	4	0.042033	0.11195	1	2055	3	1.3438	4	0.005128	0.017822	0.610682	576	4	1.3971
TMEM147	19	4	0.0017116	0.0061277	0.57865	213	2	1.8502	4	0.013221	0.043449	1	823	3	1.8229	4	0.0013374	0.0048311	0.623233	151	4	2.1977	4	0.0051892	0.018022	0.615124	577	3	1.9337
BOD1L1	4	4	0.13299	0.27404	1	4690	2	0.17204	4	0.086062	0.19384	1	3391	3	1.4327	4	0.13938	0.28459	1	4897	2	0.70711	4	0.0051953	0.01804	0.615124	578	4	1.2003
P2RX1	17	4	0.51327	0.66039	1	11665	1	0.35178	4	0.32187	0.48157	1	8798	2	1.0379	4	0.016635	0.053857	1	1012	3	1.6408	4	0.0051976	0.018044	0.615124	579	4	1.5105
GYPA	4	4	0.49283	0.64119	1	11335	2	0.82291	4	0.5003	0.64828	1	11726	2	0.82758	4	0.024078	0.075638	1	1362	4	1.3715	4	0.005216	0.018099	0.615124	580	4	1.3361
MYO9B	19	4	0.068204	0.16165	1	2872	3	1.175	4	0.28126	0.4439	1	7928	2	0.74922	4	0.49468	0.6427	1	11569	2	0.39075	4	0.005217	0.018104	0.615124	581	4	1.0926
ITGA10	1	4	0.39484	0.54885	1	9799	1	0.49052	4	0.32851	0.48786	1	8949	2	0.65501	4	0.22077	0.3852	1	6782	2	0.88533	4	0.0052426	0.018186	0.616803	582	3	1.215
ASGR1	17	4	0.010645	0.035577	0.939106	756	4	1.0655	4	0.2974	0.45875	1	8275	2	0.43416	4	0.8266	0.83056	1	16473	1	0.19397	4	0.0052523	0.018215	0.616803	583	4	0.62074
PAFAH1B3	19	4	0.052962	0.13312	1	2383	2	1.0713	4	0.010192	0.034159	1	659	3	1.8466	4	0.0031896	0.011255	0.815532	276	2	-1.5182	4	0.0052821	0.018328	0.619525	584	2	0.28695
EIF3K	19	4	0.0063581	0.021883	0.851361	515	3	2.1238	4	0.095102	0.20974	1	3660	2	0.74767	4	0.0099708	0.033497	1	657	3	1.3323	4	0.0052964	0.01837	0.619525	585	3	1.2361
TMEM145	19	4	0.0084855	0.028804	0.907662	633	3	1.8285	4	0.0075478	0.025745	0.990336	519	2	-0.59586	4	0.4568	0.60681	1	10957	2	0.64887	4	0.0053439	0.018525	0.621827	586	2	0.18587
IGSF23	19	4	0.001317	0.0047691	0.559807	169	3	2.2053	4	0.051168	0.13001	1	2286	3	1.6984	4	0.34931	0.50542	1	9291	1	0.35578	4	0.0053487	0.018545	0.621827	587	4	1.481
CXCR4	2	4	0.18534	0.35413	1	5999	2	1.0641	4	0.73328	0.76866	1	14949	1	0.27341	4	0.32625	0.48393	1	8791	2	-0.26508	4	0.0053529	0.018556	0.621827	588	4	0.69073
GTF2F1	19	4	0.32441	0.48329	1	8628	2	0.056598	4	0.2443	0.40961	1	7217	2	0.70958	4	0.01977	0.063123	1	1148	3	1.3878	4	0.0053588	0.01858	0.621827	589	3	1.1734
ARID3B	15	4	0.081439	0.18554	1	3288	3	1.0223	4	0.080924	0.18479	1	3235	2	1.0193	4	0.36315	0.51834	1	9493	2	0.42725	4	0.0053826	0.018657	0.623376	590	3	1.1182
CNTNAP5	2	4	0.20422	0.37166	1	6364	2	0.86442	4	0.04165	0.112	1	1964	3	1.3524	4	0.20147	0.36727	1	6414	2	0.68744	4	0.0053973	0.018701	0.623803	591	3	1.2553
TMEM160	19	4	0.00087922	0.0031767	0.509154	125	3	2.423	4	0.015295	0.049801	1	922	3	1.8648	4	0.096031	0.21096	1	3698	2	-2.5319	4	0.0054776	0.018966	0.627819	592	2	0.47951
PSMA1	11	4	0.17878	0.34757	1	5862	2	0.64889	4	0.061817	0.14998	1	2651	3	1.3922	4	0.0069451	0.023792	0.97617	484	2	1.2102	4	0.0054796	0.018975	0.627819	593	4	1.0452
ASNA1	19	4	0.10106	0.22007	1	3865	1	0.2258	4	0.16784	0.33042	1	5660	3	0.9954	4	0.41483	0.56711	1	10297	2	0.48432	4	0.0054839	0.018992	0.627819	594	4	0.84933
ZNF394	7	4	0.49691	0.64501	1	11407	2	0.52863	4	0.67872	0.73938	1	14110	1	-0.060536	4	0.0073773	0.025193	0.977997	511	4	1.0679	4	0.005485	0.019	0.627819	595	4	0.95233
NOP16	5	4	0.2645	0.42748	1	7497	1	0.29954	4	0.17815	0.34659	1	5896	3	1.0921	4	0.34101	0.49765	1	9120	1	0.027905	4	0.005486	0.019003	0.627819	596	3	1.0509
SIGLEC11	19	4	0.0086132	0.02922	0.907662	637	2	1.502	4	0.0074053	0.025277	0.990336	506	1	-0.28334	4	0.056246	0.13889	1	2567	2	1.2537	4	0.0055089	0.019086	0.629338	597	2	0.34578
LHB	19	4	0.0037974	0.013321	0.76553	349	3	2.1791	4	0.42489	0.57755	1	10495	1	0.49275	4	0.00098143	0.003541	0.595173	119	2	1.5572	4	0.005562	0.019255	0.630291	598	3	1.7356
RAB33B	4	4	0.0032153	0.011347	0.72221	314	4	2.0852	4	0.018336	0.058917	1	1059	4	1.6013	4	0.50654	0.65397	1	11766	2	0.55884	4	0.005566	0.019269	0.630291	599	3	1.7887
TYSND1	10	4	0.87285	0.87254	1	17300	0	0.50906	4	0.048209	0.12442	1	2191	3	1.5815	4	0.070067	0.16469	1	2991	2	0.65409	4	0.0055672	0.019272	0.630291	600	4	0.79547
BUD13	12	4	0.0024342	0.0086839	0.671073	259	3	1.8592	4	0.12901	0.2675	1	4586	3	1.131	4	0.0096246	0.032409	1	637	2	1.1978	4	0.0055847	0.01933	0.631164	601	3	1.7045
FBXO38	5	4	0.63459	0.71714	1	13260	1	0.58591	4	0.027313	0.083792	1	1459	3	1.4707	4	0.64798	0.72138	1	13552	1	-0.021165	4	0.0056064	0.019407	0.632676	602	4	1.0206
PLG	6	4	0.24319	0.40766	1	7105	2	0.54412	4	0.82828	0.83274	1	16571	1	0.84573	4	0.0062709	0.021595	0.969579	442	3	1.6925	4	0.0056513	0.019556	0.633783	603	4	1.1147
SAMD4B	19	4	0.051315	0.13001	1	2327	2	-0.12176	4	0.0066094	0.022721	0.965845	470	4	1.5766	4	0.0019069	0.0068178	0.714238	191	2	1.3764	4	0.0056567	0.019575	0.633783	604	3	1.3017
SNX20	16	4	0.3152	0.47464	1	8452	2	0.80716	4	0.17678	0.34442	1	5859	3	1.0622	4	0.097934	0.21431	1	3764	2	0.6068	4	0.0056623	0.019595	0.633783	605	4	0.72486
DMWD	19	4	0.0055514	0.019215	0.829423	459	2	1.4805	4	0.027115	0.083369	1	1453	3	1.6973	4	0.043279	0.11436	1	2092	1	0.22861	4	0.0056682	0.019619	0.633783	606	3	1.1437
BCKDHA	19	4	0.071069	0.16683	1	2962	3	1.3286	4	0.16227	0.32166	1	5517	2	0.6496	4	0.13201	0.27229	1	4696	3	1.1182	4	0.0056712	0.01963	0.633783	607	4	0.96553
RNF225	19	4	0.012912	0.042487	0.991403	855	4	1.9204	4	0.072029	0.16879	1	2971	2	0.70841	4	0.11888	0.25038	1	4311	3	1.3079	4	0.0056787	0.019664	0.633846	608	4	1.6363
VKORC1	16	4	0.11845	0.24987	1	4311	2	0.88328	4	0.72252	0.76254	1	14763	1	0.1601	4	0.3294	0.48692	1	8854	2	0.072067	4	0.0056999	0.019748	0.634731	609	4	0.76208
KCNJ14	19	4	0.0042842	0.014977	0.792794	376	3	1.9342	4	0.038219	0.10533	1	1835	3	1.7164	4	0.0082404	0.028009	0.993448	557	3	1.0167	4	0.0057023	0.019754	0.634731	610	3	1.3592
CRX	19	4	0.0013053	0.0047179	0.559807	168	3	1.7672	4	0.92858	0.9285	1	18516	0	0.0025641	4	0.025062	0.078352	1	1403	3	1.1138	4	0.0057118	0.01979	0.63482	611	3	1.2909
KRTAP19-8	21	4	0.15351	0.30751	1	5218	3	0.98995	4	0.89192	0.89163	1	17772	0	0.16132	4	0.10085	0.21945	1	3838	2	0.98272	4	0.0057265	0.019837	0.63482	612	4	0.79791
ZSCAN1	19	4	0.018645	0.05979	1	1103	2	1.3551	4	0.2451	0.41038	1	7229	2	0.64847	4	0.049478	0.12607	1	2306	2	0.67953	4	0.0057309	0.019852	0.63482	613	4	0.79603
DMKN	19	4	0.043079	0.11447	1	2034	3	1.4709	4	0.42869	0.58112	1	10560	2	0.45065	4	0.027504	0.083292	1	1504	3	1.4344	4	0.0057476	0.019906	0.635526	614	4	0.93436
GSTA5	6	4	0.098821	0.21615	1	3796	3	0.98395	4	0.51307	0.66025	1	11946	2	0.7361	4	0.1814	0.34855	1	6020	2	0.3459	4	0.0057587	0.01994	0.635601	615	4	0.71397
LRIG2	1	4	0.15359	0.30763	1	5224	3	0.92844	4	0.81707	0.82391	1	16362	1	0.41118	4	0.074038	0.17183	1	3113	3	1.1342	4	0.0057749	0.019984	0.635986	616	3	1.1933
IFNL3	19	4	0.014459	0.047257	1	925	3	1.6431	4	0.02812	0.085461	1	1493	3	1.1913	4	0.20101	0.36684	1	6403	1	0.18978	4	0.0057829	0.020015	0.635986	617	3	1.5022
ATP12A	10	4	0.34435	0.50182	1	8991	2	0.8492	4	0.93294	0.9329	1	18596	0	0.13775	4	0.0050334	0.017498	0.896865	385	4	1.2768	4	0.0058665	0.020298	0.642436	618	4	1.1013
MIF	22	4	0.34088	0.49858	1	8938	2	0.58177	4	0.16614	0.32773	1	5616	3	1.2266	4	0.038746	0.10556	1	1928	2	1.1601	4	0.0058713	0.020314	0.642436	619	3	1.1391
GPN1	2	4	0.077163	0.17783	1	3147	2	0.88468	4	0.00092266	0.0033377	0.552386	121	3	1.4195	4	0.0047106	0.016421	0.876185	370	1	-1.1268	4	0.0058806	0.020352	0.642624	620	2	0.63001
CLDN17	21	4	0.098164	0.21499	1	3780	3	1.0547	4	0.64259	0.72208	1	13605	1	-0.32218	4	0.28357	0.4438	1	7988	2	0.61199	4	0.0058914	0.020391	0.642874	621	4	0.76054
LILRB3	19	4	0.0033304	0.011725	0.734663	320	3	1.6996	4	0.027375	0.083924	1	1464	3	1.6412	4	0.039773	0.10755	1	1970	3	1.1627	4	0.0059219	0.02049	0.643803	622	3	1.4594
ZNF550	19	4	0.19499	0.36313	1	6185	2	0.58906	4	0.33311	0.49206	1	9020	2	0.83629	4	0.41314	0.56549	1	10270	2	0.40285	4	0.0059233	0.020496	0.643803	623	4	0.91961
SBK2	19	4	0.005324	0.018455	0.829423	445	3	1.7654	4	0.075575	0.17519	1	3065	3	1.0834	4	0.10256	0.22238	1	3889	2	0.083069	4	0.0059337	0.020531	0.643803	624	3	1.0913
DDX19A	16	4	0.0038926	0.013638	0.769795	355	3	1.2787	4	0.40494	0.5588	1	10183	2	0.69359	4	0.055041	0.13665	1	2528	3	1.2253	4	0.0059409	0.020549	0.643803	625	3	1.1173
DDX60L	4	4	0.27011	0.43266	1	7603	2	0.95299	4	0.29872	0.45999	1	8308	1	0.37013	4	0.28721	0.44713	1	8056	2	0.78376	4	0.0059541	0.020588	0.644019	626	4	1.2928
PTGES2	9	4	0.034553	0.097848	1	1738	3	1.7716	4	0.0065975	0.02267	0.965845	468	2	0.81644	4	0.077472	0.17804	1	3208	1	-2.551	4	0.0059747	0.020653	0.645048	627	2	-1.224
CLASP1	2	4	0.11153	0.23815	1	4134	3	0.97488	4	0.38241	0.53765	1	9847	2	0.56211	4	0.49797	0.64584	1	11625	1	-0.080889	4	0.005993	0.020714	0.645951	628	4	0.75143
DNTTIP2	1	4	0.020906	0.066444	1	1199	4	1.5996	4	0.16591	0.32739	1	5610	3	0.94522	4	0.13103	0.27064	1	4669	2	0.10357	4	0.0060206	0.020794	0.647321	629	4	1.0122
MB21D1	11	4	0.02386	0.075035	1	1349	2	0.57412	4	0.13856	0.28344	1	4851	3	1.1367	4	0.85549	0.85574	1	17026	1	0.38608	4	0.0060299	0.020822	0.647321	630	4	0.97693
PHLDB3	19	4	0.0019997	0.0071501	0.622584	231	3	2.1681	4	0.12911	0.26768	1	4589	2	0.84756	4	0.038755	0.10558	1	1929	3	1.0805	4	0.006062	0.020937	0.649882	631	3	1.4308
PPP1R14A	19	4	0.0037068	0.013011	0.756387	344	2	-1.1939	4	0.01308	0.043008	1	815	2	-0.6633	4	0.016283	0.052838	1	987	3	1.6722	4	0.006093	0.021054	0.652254	632	2	0.012925
GPR139	16	4	0.79141	0.8047	1	15710	1	0.20501	4	0.88353	0.88323	1	17627	0	0.66992	4	0.079472	0.18166	1	3267	3	1.183	4	0.0061029	0.021078	0.652254	633	4	0.847
IGSF8	1	4	0.84966	0.85063	1	16814	1	0.42411	4	0.88143	0.88112	1	17583	0	-0.60334	4	0.42642	0.57809	1	10477	2	0.65156	4	0.0061309	0.021167	0.65399	634	4	0.55245
KEAP1	19	4	0.06992	0.16479	1	2920	3	1.336	4	0.38133	0.53667	1	9837	1	-0.3336	4	0.16263	0.32215	1	5580	3	0.87114	4	0.0061548	0.021239	0.654381	635	3	0.91883
KANSL3	2	4	0.38027	0.53521	1	9571	2	0.3583	4	0.13168	0.27199	1	4660	2	1.0038	4	0.4977	0.64559	1	11619	2	0.66234	4	0.0061649	0.021268	0.654381	636	4	0.94458
C1orf61	1	4	0.30735	0.46729	1	8306	2	0.35433	4	0.14256	0.28995	1	4977	2	0.86155	4	0.50001	0.64779	1	11653	2	0.62773	4	0.0061672	0.021277	0.654381	637	4	0.85008
GABRG1	4	4	0.038968	0.10649	1	1887	3	1.1314	4	0.074098	0.17251	1	3024	3	1.1657	4	0.37364	0.52816	1	9652	1	-0.52592	4	0.0061941	0.021357	0.655831	638	3	0.92201
APOC4	19	4	0.068256	0.16174	1	2874	2	0.81199	4	0.42413	0.57683	1	10484	1	-0.66804	4	0.0073582	0.025132	0.977997	509	3	1.5488	4	0.0062119	0.021413	0.656567	639	4	1.1665
CDKL5	X	4	0.51684	0.66383	1	11720	1	0.60631	4	0.13169	0.272	1	4663	3	1.1782	4	0.87918	0.87883	1	17518	0	-0.25995	4	0.006232	0.021471	0.657331	640	4	0.9377
OSTM1	6	4	0.0047767	0.016654	0.813835	410	3	2.1961	4	0.41739	0.57049	1	10377	1	0.46869	4	0.14573	0.29487	1	5069	3	0.80956	4	0.0062716	0.021598	0.659212	641	3	1.3953
OSCAR	19	4	0.018501	0.059379	1	1097	2	0.69	4	0.23905	0.40486	1	7107	2	1.2811	4	0.00231	0.0082498	0.779041	212	3	1.8379	4	0.0063054	0.021707	0.661103	642	3	1.6025
HNRNPUL1	19	4	0.40727	0.56062	1	9987	2	0.75469	4	0.17394	0.34002	1	5793	1	0.047334	4	0.039733	0.10748	1	1967	2	1.1021	4	0.0063188	0.02175	0.661103	643	4	0.89396
SCNN1D	1	4	0.52341	0.67006	1	11836	2	0.74055	4	0.48586	0.6348	1	11487	2	0.8167	4	0.23196	0.39559	1	6980	2	0.90735	4	0.0063272	0.021779	0.661103	644	4	0.98631
TIRAP	11	4	0.59213	0.69837	1	12679	1	0.020673	4	0.066413	0.15857	1	2803	3	1.1862	4	0.34767	0.50393	1	9259	2	0.41909	4	0.0063427	0.021834	0.661103	645	4	1.0116
MRPS33	7	4	0.72564	0.76352	1	14570	1	0.44231	4	0.75772	0.78326	1	15347	1	0.68601	4	0.021083	0.066955	1	1221	4	0.87771	4	0.0063509	0.021862	0.661103	646	4	1.1135
KRTAP10-3	21	4	0.6376	0.71849	1	13303	1	-0.14941	4	0.05092	0.12954	1	2279	3	1.4355	4	0.8906	0.89026	1	17740	0	0.029149	4	0.0063584	0.021883	0.661103	647	4	0.82482
CIC	19	4	0.036905	0.10243	1	1811	2	1.2237	4	0.098524	0.21579	1	3737	3	1.3708	4	0.097974	0.21438	1	3765	2	0.63287	4	0.0063668	0.021916	0.661103	648	4	0.973
STAT6	12	4	0.32975	0.48834	1	8733	2	0.8669	4	0.39542	0.54984	1	10056	2	0.77129	4	0.24037	0.40344	1	7132	1	-0.36541	4	0.0063692	0.021923	0.661103	649	4	0.68632
LCOR	10	4	0.30786	0.46774	1	8315	2	0.65418	4	0.83793	0.8406	1	16751	1	-0.0027929	4	0.90115	0.90093	1	17964	0	0.36389	4	0.0063788	0.021956	0.661121	650	4	0.65318
ZNF613	19	4	0.013078	0.043006	0.994281	863	4	1.3553	4	0.34308	0.50125	1	9242	2	0.62451	4	0.12659	0.26324	1	4545	3	0.8269	4	0.0063979	0.022026	0.66166	651	3	1.4195
ZNF577	19	4	0.12746	0.26486	1	4563	2	0.44536	4	0.014202	0.046457	1	867	3	1.7576	4	0.021349	0.067733	1	1236	4	0.93467	4	0.0064022	0.02204	0.66166	652	4	1.404
OR4N2	14	4	0.91744	0.91735	1	18244	0	0.12241	4	0.20243	0.37114	1	6430	2	0.94588	4	0.41109	0.56358	1	10233	1	-0.044845	4	0.0064332	0.02213	0.662411	653	4	0.8044
PPP2CB	8	4	0.31681	0.47615	1	8481	2	0.80707	4	0.066549	0.15882	1	2809	2	1.21	4	0.15066	0.30285	1	5226	2	0.72624	4	0.0064372	0.022145	0.662411	654	3	1.0256
MKRN2OS	3	4	0.36085	0.51712	1	9293	2	0.52448	4	0.011922	0.039492	1	754	3	1.7179	4	0.67959	0.73694	1	13976	1	-0.2441	4	0.0064452	0.022176	0.662411	655	3	1.2126
CT47A4	X	4	0.094971	0.20935	1	3698	3	0.9998	4	0.041905	0.11248	1	1971	3	1.5934	4	0.49243	0.64064	1	11532	1	0.2992	4	0.0064599	0.022225	0.662411	656	4	1.252
STOM	9	4	0.38641	0.54092	1	9660	2	0.92853	4	0.16116	0.31985	1	5481	2	1.095	4	0.013257	0.043565	1	845	2	1.2757	4	0.0064699	0.02226	0.662411	657	3	1.4008
MEST	7	4	0.4469	0.59783	1	10595	2	0.62105	4	0.5372	0.67798	1	12298	1	0.52012	4	0.41488	0.56717	1	10298	2	0.32176	4	0.0064805	0.022291	0.662411	658	4	0.96755
HNRNPH1	5	4	0.4006	0.55438	1	9880	2	0.85779	4	0.74343	0.77467	1	15103	1	-0.51294	4	0.011338	0.03772	1	735	2	1.334	4	0.006483	0.022302	0.662411	659	4	0.54708
TRIL	7	4	0.14474	0.29338	1	4995	3	1.0631	4	0.46332	0.61358	1	11128	1	0.42714	4	0.76863	0.78825	1	15408	1	0.19314	4	0.0064976	0.022347	0.662411	660	4	0.86227
NAT14	19	4	0.10007	0.21833	1	3834	3	1.105	4	0.14017	0.28607	1	4900	2	0.23824	4	0.0080395	0.027358	0.990945	548	4	1.5179	4	0.0065025	0.022361	0.662411	661	4	0.84253
CEACAM21	19	4	0.0046908	0.01635	0.810855	404	3	1.6368	4	0.16267	0.3223	1	5525	2	0.96347	4	4.3548e-05	0.00016662	0.136736	24	3	2.7026	4	0.0065155	0.022411	0.662908	662	3	1.6771
OTOP1	4	4	0.083593	0.18928	1	3346	3	1.0905	4	0.71353	0.75759	1	14619	1	0.11519	4	0.14603	0.29536	1	5078	2	0.63544	4	0.0065282	0.022455	0.663228	663	4	0.75747
F11R	1	4	0.37134	0.52683	1	9444	2	0.57289	4	0.73646	0.77054	1	14986	1	0.69648	4	0.026542	0.081307	1	1460	3	1.3227	4	0.0065404	0.022492	0.663359	664	4	0.83886
RTN2	19	4	0.00013019	0.00048068	0.236588	39	3	2.4943	4	0.10995	0.23555	1	4070	2	0.4462	4	0.010072	0.0338	1	661	3	1.653	4	0.0065716	0.022585	0.664517	665	4	1.5108
TSEN2	3	4	0.93597	0.93596	1	18605	0	-0.0096122	4	0.4409	0.59253	1	10754	2	0.6692	4	0.50264	0.65026	1	11696	1	0.11102	4	0.0065749	0.022598	0.664517	666	4	0.56857
LCK	1	4	0.57621	0.69182	1	12473	1	0.15999	4	0.10765	0.23164	1	4003	2	0.46146	4	0.19603	0.3622	1	6312	2	0.76698	4	0.0065904	0.022647	0.665007	667	3	1.0923
ZNF296	19	4	0.016475	0.053397	1	1015	4	1.4642	4	0.18421	0.35428	1	6055	1	0.56706	4	0.41367	0.56599	1	10279	2	0.20305	4	0.0066009	0.022685	0.665149	668	3	1.3892
BRICD5	16	4	0.068232	0.1617	1	2873	3	1.2534	4	0.30892	0.46947	1	8502	2	0.74775	4	0.33501	0.49206	1	8971	1	0.36087	4	0.0066092	0.022721	0.665218	669	3	1.1102
TANGO6	16	4	0.0092283	0.031167	0.916741	679	3	1.665	4	0.093525	0.20699	1	3613	2	0.72191	4	0.031469	0.091204	1	1652	3	1.1805	4	0.0066365	0.022803	0.665971	670	3	1.5159
ALOX5AP	13	4	0.45281	0.60344	1	10695	2	0.68098	4	0.43946	0.5912	1	10732	1	0.5534	4	0.74148	0.77135	1	14959	1	-0.24687	4	0.0066453	0.022825	0.665971	671	4	0.64124
ARPC2	2	4	0.5051	0.65271	1	11536	2	-0.12873	4	0.013929	0.045622	1	854	4	1.5319	4	0.60768	0.70269	1	12994	1	0.27834	4	0.0066515	0.022846	0.665971	672	4	0.87236
AKT2	19	4	0.024784	0.077625	1	1384	4	1.7981	4	0.1573	0.31367	1	5380	1	-0.5173	4	0.048252	0.12376	1	2253	2	0.20804	4	0.0066769	0.022924	0.66628	673	3	0.37299
ITGBL1	13	4	0.80989	0.81808	1	16075	1	0.31629	4	0.48089	0.63014	1	11399	2	0.30204	4	0.10983	0.23498	1	4077	3	0.96344	4	0.0066976	0.022992	0.66628	674	4	0.56632
NAPSA	19	4	0.073669	0.17153	1	3048	3	1.2508	4	0.21234	0.38024	1	6608	2	0.92296	4	0.28167	0.44204	1	7950	2	0.69877	4	0.0067014	0.022999	0.66628	675	4	1.02
SPRN	10	4	0.37529	0.53057	1	9491	1	0.025349	4	0.51586	0.66293	1	11990	2	0.6257	4	0.17174	0.33654	1	5798	3	0.63269	4	0.0067064	0.023014	0.66628	676	4	0.57507
DNAH14	1	4	0.13014	0.26934	1	4626	2	0.16729	4	0.1189	0.25071	1	4307	3	1.1542	4	0.0089223	0.030218	1	594	4	1.1467	4	0.0067081	0.023022	0.66628	677	3	0.94262
DRG2	17	4	0.085488	0.19259	1	3402	2	0.84349	4	0.23998	0.40571	1	7131	1	0.038697	4	0.15817	0.31494	1	5470	2	1.0224	4	0.0067271	0.023086	0.666939	678	3	1.3672
GTF2H1	11	4	0.077223	0.17794	1	3148	3	1.0878	4	0.73986	0.77249	1	15040	1	0.45165	4	0.48865	0.63706	1	11467	1	0.21886	4	0.0067504	0.023177	0.667642	679	4	0.91715
TOMM40	19	4	0.0048564	0.016913	0.813835	417	3	1.8257	4	0.35949	0.51645	1	9538	1	0.46362	4	0.14428	0.29251	1	5039	2	1.0304	4	0.0067717	0.023248	0.667642	680	3	1.2361
RPL5	1	4	0.81684	0.82337	1	16184	1	0.24098	4	0.068862	0.16307	1	2879	2	1.0916	4	0.017133	0.055337	1	1027	4	1.2584	4	0.0067802	0.023271	0.667642	681	3	1.3575
PCSK4	19	4	0.82865	0.83277	1	16406	1	0.5575	4	0.45586	0.60654	1	11004	2	0.74782	4	0.73676	0.76852	1	14887	1	0.23874	4	0.0067893	0.023298	0.667642	682	4	0.8702
PIGX	3	4	0.26462	0.42759	1	7500	2	0.76987	4	0.0094358	0.03183	1	612	2	1.3283	4	0.42397	0.57579	1	10435	1	-0.50503	4	0.006793	0.02331	0.667642	683	4	0.7514
PRODH	22	4	0.7367	0.76991	1	14735	1	-0.30006	4	0.028273	0.085728	1	1501	3	1.6439	4	0.63259	0.71403	1	13340	1	-0.047498	4	0.0068133	0.023371	0.667642	684	4	0.69968
ZNF134	19	4	0.060465	0.1472	1	2622	3	1.1718	4	0.53351	0.67662	1	12257	1	0.082784	4	0.34326	0.49977	1	9164	2	0.72751	4	0.0068348	0.023434	0.667642	685	4	0.73835
PIGL	17	4	0.1782	0.34667	1	5846	3	0.88608	4	0.011756	0.038957	1	746	4	1.4294	4	0.19133	0.35779	1	6229	2	0.44044	4	0.0068437	0.023464	0.667642	686	3	1.2401
SRXN1	20	4	0.83851	0.84088	1	16600	1	0.55735	4	0.4736	0.62331	1	11278	2	0.4	4	0.021411	0.067908	1	1239	4	0.98891	4	0.0068653	0.023535	0.667642	687	4	0.95448
TMEM183B	3	4	0.45563	0.6061	1	10743	2	0.51645	4	0.059476	0.14562	1	2569	3	1.4518	4	0.90658	0.90647	1	18078	0	0.19236	4	0.0068678	0.023541	0.667642	688	4	0.79974
PPAP2C	11	4	0.28873	0.44989	1	7964	2	0.74324	4	0.75339	0.78064	1	15268	1	0.53018	4	0.14198	0.28879	1	4976	3	0.95392	4	0.0068754	0.023564	0.667642	689	4	0.74716
RYR1	19	4	4.012e-05	0.0001553	0.130157	24	2	0.68237	4	0.0693	0.16387	1	2894	1	-3.3264	4	0.035588	0.09935	1	1815	2	1.0265	4	0.0068892	0.023607	0.667642	690	1	-2.1294
LZTS2	10	4	0.87507	0.87471	1	17353	0	0.61981	4	0.43263	0.58482	1	10620	1	0.3334	4	0.45923	0.60909	1	10996	1	0.048258	4	0.0068895	0.023607	0.667642	691	4	0.67043
OR7C2	19	4	0.74726	0.77627	1	14929	1	0.28274	4	0.15996	0.31791	1	5447	2	0.77115	4	0.14783	0.29828	1	5146	3	0.8493	4	0.0068902	0.023611	0.667642	692	3	1.0306
MGAT1	5	4	0.77578	0.79403	1	15429	1	0.11533	4	0.03697	0.10285	1	1788	3	1.5074	4	0.4108	0.56333	1	10226	2	0.57534	4	0.0068958	0.023633	0.667642	693	4	0.82452
LRRC24	8	4	0.52487	0.67144	1	11868	1	0.061041	4	0.47727	0.62676	1	11337	2	0.55814	4	0.0087235	0.029584	1	584	3	1.708	4	0.0069194	0.023715	0.668997	694	3	1.34
PTPRH	19	4	0.024338	0.076364	1	1368	2	0.70032	4	0.013568	0.044518	1	837	2	0.19372	4	0.0074307	0.025372	0.977997	514	3	2.1857	4	0.0069422	0.023785	0.669106	695	1	-0.39721
ADARB2	10	4	0.45424	0.60479	1	10719	2	0.47573	4	0.24566	0.41089	1	7239	2	1.0788	4	0.42059	0.57258	1	10388	2	0.63117	4	0.006983	0.02392	0.670685	696	4	1.0585
INSL4	9	4	0.084368	0.19062	1	3371	2	0.72313	4	0.15795	0.31469	1	5391	2	0.94686	4	0.096064	0.21102	1	3699	2	0.82065	4	0.0069907	0.023945	0.670685	697	3	1.2958
FOXP3	X	4	0.29319	0.45404	1	8033	2	0.52178	4	0.22964	0.3961	1	6944	2	0.59543	4	0.45591	0.60596	1	10938	1	0.41542	4	0.0069985	0.023974	0.670685	698	4	0.79062
CAPN10	2	4	0.89406	0.89379	1	17739	0	-0.93962	4	0.26934	0.43279	1	7698	2	0.79382	4	0.066701	0.15847	1	2886	3	1.2117	4	0.0070503	0.024152	0.67244	699	4	0.6257
GNAZ	22	4	0.23838	0.40325	1	7007	1	-0.53942	4	0.85047	0.85151	1	16978	0	0.069056	4	0.014051	0.045997	1	884	2	1.089	4	0.0070532	0.024158	0.67244	700	3	0.88412
OR56A3	11	4	0.20249	0.37009	1	6331	2	1.1371	4	0.15637	0.31214	1	5352	2	0.75291	4	0.094238	0.20779	1	3648	2	0.0064658	4	0.0070619	0.024185	0.67244	701	2	0.74359
CACNG8	19	4	0.016389	0.053143	1	1007	3	1.7571	4	0.23826	0.40412	1	7093	2	-0.72298	4	0.076469	0.17624	1	3185	2	0.77145	4	0.0070671	0.024204	0.67244	702	3	1.2027
GPR176	15	4	0.098288	0.2152	1	3785	2	1.085	4	0.35824	0.51526	1	9521	2	0.64014	4	0.31582	0.47406	1	8610	1	-0.61438	4	0.0071076	0.024335	0.674215	703	4	0.8831
PMF1-BGLAP	1	4	0.11545	0.2448	1	4234	2	1.107	4	0.3504	0.50802	1	9405	2	0.55007	4	0.0039384	0.013807	0.84983	319	3	1.9159	4	0.0071544	0.02449	0.676797	704	3	1.2713
GOLM1	9	4	0.14824	0.29906	1	5079	2	0.87851	4	0.05009	0.12797	1	2253	3	1.4991	4	0.17593	0.3431	1	5907	2	0.64526	4	0.0071679	0.024535	0.676955	705	3	1.1672
ZNF135	19	4	0.26537	0.42828	1	7513	2	0.70268	4	0.13948	0.28493	1	4883	3	1.3287	4	0.82999	0.83334	1	16549	1	-0.1312	4	0.007181	0.024584	0.677384	706	4	1.1368
RNASEK	17	4	0.026248	0.081277	1	1441	3	1.4359	4	0.21411	0.38188	1	6647	2	1.0257	4	0.083461	0.18872	1	3362	3	1.1904	4	0.0072011	0.024647	0.678191	707	3	1.3837
HOXD9	2	4	0.074719	0.1734	1	3081	2	0.98192	4	0.074314	0.1729	1	3032	1	0.20832	4	0.82705	0.83092	1	16486	1	-0.20518	4	0.007225	0.024715	0.678467	708	3	0.83349
SCD5	4	4	0.44206	0.59331	1	10524	2	0.13752	4	0.2377	0.40361	1	7084	2	1.0351	4	0.49726	0.64517	1	11611	2	0.45232	4	0.0072311	0.024735	0.678467	709	4	0.67309
CENPO	2	4	0.067137	0.15968	1	2842	3	1.1911	4	0.78476	0.80059	1	15780	1	0.19781	4	0.76476	0.78573	1	15339	1	0.45033	4	0.0072669	0.024845	0.678467	710	4	0.84593
OR6N2	1	4	0.63971	0.71953	1	13328	1	0.24491	4	0.44039	0.59206	1	10742	2	0.19842	4	0.009145	0.030917	1	603	4	1.188	4	0.0072828	0.0249	0.678467	711	4	0.93669
TAS2R8	12	4	0.052452	0.13215	1	2371	2	-1.384	4	0.0012113	0.0043822	0.607887	144	4	2.6175	4	0.033133	0.094509	1	1713	2	-1.722	4	0.0072992	0.024953	0.678467	712	2	-0.42282
SLC7A6OS	16	4	0.90529	0.90509	1	17974	0	0.38681	4	0.82349	0.82893	1	16481	1	0.55762	4	0.24376	0.40657	1	7202	2	0.47599	4	0.0073014	0.024959	0.678467	713	4	0.57283
C4orf22	4	4	0.81923	0.82523	1	16233	1	-0.28944	4	0.31869	0.4786	1	8721	2	0.71031	4	0.054313	0.1353	1	2502	2	0.76852	4	0.0073188	0.025006	0.678467	714	4	0.59342
MRPL34	19	4	0.17841	0.34699	1	5852	2	1.008	4	0.1644	0.32499	1	5565	3	0.87298	4	0.45293	0.60316	1	10899	1	-0.27215	4	0.0073468	0.025094	0.678467	715	4	1.0511
FAM46B	12	4	0.33901	0.49682	1	8902	2	-0.19889	4	0.35804	0.51507	1	9516	2	0.8667	4	0.0028486	0.010071	0.81145	246	4	1.7853	4	0.0073578	0.025131	0.678467	716	3	1.2146
CCDC94	2	4	0.070886	0.1665	1	2951	2	0.86368	4	0.17081	0.33516	1	5727	3	0.87924	4	0.024046	0.075547	1	1359	4	0.87447	4	0.0073777	0.025193	0.678467	717	4	1.015
ADRA2B	2	4	0.49221	0.64062	1	11321	2	0.65954	4	0.74074	0.77306	1	15055	1	0.23063	4	0.73618	0.76818	1	14866	1	0.22822	4	0.007379	0.025195	0.678467	718	4	0.76218
SNCB	5	4	0.31675	0.47609	1	8480	2	0.53755	4	0.40969	0.56329	1	10261	2	0.87443	4	0.17158	0.33629	1	5794	3	0.71381	4	0.0073906	0.025227	0.678467	719	4	1.2259
KRTAP24-1	21	4	0.42171	0.57421	1	10216	1	0.42093	4	0.71355	0.7576	1	14621	1	0.5155	4	0.14021	0.28594	1	4927	3	0.89505	4	0.0073996	0.025257	0.678467	720	3	1.0733
HOXB7	17	4	0.40461	0.55809	1	9938	2	0.69364	4	0.78318	0.79954	1	15758	1	0.1768	4	0.058394	0.14292	1	2631	3	1.0409	4	0.0074126	0.025307	0.678467	721	4	0.9101
QKI	6	4	0.12263	0.25679	1	4425	3	1.0666	4	0.040814	0.11035	1	1928	3	1.4228	4	0.61461	0.70581	1	13098	1	-0.15878	4	0.0074176	0.025321	0.678467	722	3	1.2406
NUP88	17	4	0.02433	0.07634	1	1367	2	0.28586	4	0.0095946	0.032315	1	621	3	1.9488	4	0.071027	0.16639	1	3025	3	1.381	4	0.007438	0.025395	0.678467	723	3	1.4187
B4GALT2	1	4	0.47443	0.62391	1	11032	2	0.74503	4	0.077649	0.17891	1	3137	3	1.3433	4	0.26413	0.42564	1	7599	2	0.54739	4	0.0074424	0.025405	0.678467	724	3	1.2827
RCE1	11	4	0.38635	0.54085	1	9659	2	0.77311	4	0.83281	0.83646	1	16660	1	-0.2793	4	0.18555	0.35237	1	6110	2	0.67331	4	0.0074437	0.025412	0.678467	725	4	0.76544
EGFR	7	4	0.031767	0.092313	1	1642	3	1.4188	4	0.51321	0.66037	1	11948	2	0.20128	4	0.48377	0.63246	1	11386	2	0.5507	4	0.0074599	0.025467	0.678467	726	4	0.8989
FAU	11	4	0.033587	0.095945	1	1706	3	1.4682	4	0.73524	0.76981	1	14973	1	0.11074	4	0.13426	0.27603	1	4757	2	0.74169	4	0.0075187	0.025656	0.680452	727	2	0.83115
ZNF292	6	4	0.38919	0.54351	1	9703	2	0.80072	4	0.25088	0.4157	1	7324	2	0.83907	4	0.61723	0.70698	1	13136	1	-0.25937	4	0.007521	0.025661	0.680452	728	4	0.57786
PRR14	16	4	0.7491	0.77736	1	14958	1	0.25267	4	0.49439	0.6427	1	11626	2	0.50012	4	0.11794	0.24879	1	4283	1	0.47832	4	0.0075319	0.025699	0.680452	729	4	0.81027
MTMR9	8	4	0.0095998	0.03233	0.916741	705	3	1.9137	4	0.3666	0.52301	1	9621	2	0.78715	4	0.75208	0.77785	1	15118	1	0.47543	4	0.007536	0.025708	0.680452	730	4	0.98897
SLC12A3	16	4	0.01109	0.036952	0.947418	777	3	1.6127	4	0.007831	0.026678	0.996519	533	4	1.4348	4	0.57398	0.68834	1	12618	1	-0.83573	4	0.0075377	0.025711	0.680452	731	3	1.687
ABHD11	7	4	0.040775	0.11	1	1962	3	1.3209	4	0.52883	0.67487	1	12205	1	-0.28266	4	0.049272	0.12567	1	2297	3	1.0975	4	0.0075651	0.025802	0.681965	732	3	1.0651
CHCHD10	22	4	0.53904	0.67715	1	12019	1	0.35144	4	0.58297	0.69592	1	12847	1	0.57472	4	0.12127	0.25436	1	4386	2	0.46533	4	0.0075935	0.0259	0.683669	733	4	0.60483
TCF23	2	4	0.51393	0.66102	1	11673	2	0.69858	4	0.89124	0.89093	1	17753	0	0.43184	4	0.18994	0.35646	1	6205	1	-0.19376	4	0.0076196	0.025979	0.684847	734	4	0.59201
EVPLL	17	4	0.14831	0.29916	1	5084	1	-0.028208	4	0.31434	0.47457	1	8624	2	0.67996	4	0.27499	0.43583	1	7813	2	0.89427	4	0.0076291	0.026013	0.684847	735	3	1.0647
PVRIG	7	4	0.43743	0.58896	1	10461	1	0.15571	4	0.27904	0.44185	1	7885	2	0.94211	4	0.076767	0.17678	1	3192	2	0.94667	4	0.007689	0.026211	0.687951	736	3	1.1019
FAM9C	X	4	0.54002	0.6775	1	12030	1	0.23616	4	0.19413	0.36346	1	6258	2	0.88649	4	0.73909	0.76989	1	14923	1	0.2188	4	0.0077094	0.026274	0.688125	737	4	0.91664
IGLL1	22	4	0.0014373	0.0051831	0.561376	183	3	1.9063	4	0.6123	0.70835	1	13215	1	0.63603	4	0.03842	0.1049	1	1914	1	0.25304	4	0.0077249	0.026326	0.688595	738	2	-0.44104
GPR89A	1	4	0.44489	0.59595	1	10570	2	0.80408	4	0.38558	0.54062	1	9895	2	0.88818	4	0.42154	0.57348	1	10406	2	0.5494	4	0.00774	0.026386	0.68927	739	4	0.95157
MS4A10	11	4	0.0055725	0.019291	0.829423	463	2	1.0014	4	0.49399	0.64232	1	11620	2	0.65829	4	0.0060984	0.021068	0.962338	434	3	1.5524	4	0.0077686	0.026474	0.689797	740	3	1.2592
SLC25A23	19	4	0.064315	0.15445	1	2754	3	1.1254	4	0.7117	0.75661	1	14585	1	0.86115	4	0.1074	0.23083	1	4010	2	1.0119	4	0.0077748	0.026494	0.689797	741	4	1.0404
C17orf51	17	4	0.18901	0.3575	1	6065	2	0.31367	4	0.35781	0.51486	1	9511	2	1.0025	4	0.0053846	0.018663	0.915588	404	4	1.0916	4	0.0077796	0.02651	0.689797	742	3	1.0978
HBA2	16	4	0.22736	0.39301	1	6796	2	0.90689	4	0.86319	0.86324	1	17216	1	-0.11326	4	0.32851	0.4861	1	8840	2	0.69114	4	0.0078182	0.026636	0.691287	743	4	0.98499
PFDN5	12	4	0.073868	0.17188	1	3056	2	-0.83412	4	0.11817	0.2495	1	4282	2	1.1138	4	0.10856	0.23281	1	4039	3	0.96119	4	0.0078454	0.026728	0.692782	744	2	0.84421
BLMH	17	4	0.009595	0.032316	0.916741	704	2	1.3966	4	0.018564	0.059556	1	1078	3	1.7815	4	0.16654	0.32833	1	5672	2	0.71841	4	0.0078772	0.026838	0.694348	745	3	1.4245
SAR1A	10	4	0.030882	0.09059	1	1606	3	1.0556	4	0.43607	0.58797	1	10679	2	0.81732	4	0.021177	0.067248	1	1222	3	1.2001	4	0.007884	0.026857	0.694348	746	3	1.3538
IER2	19	4	0.26057	0.42382	1	7417	2	0.50648	4	0.1128	0.24039	1	4131	2	1.0917	4	0.32144	0.47935	1	8712	2	0.17356	4	0.007897	0.026897	0.694499	747	4	0.71258
SCN4B	11	4	0.11598	0.24568	1	4248	3	1.3146	4	0.014181	0.046394	1	865	3	1.5858	4	0.053427	0.13361	1	2466	3	0.72257	4	0.0079226	0.026986	0.695104	748	3	1.4217
HDDC3	15	4	0.11902	0.25081	1	4327	3	1.123	4	0.31753	0.47754	1	8699	2	0.83047	4	0.45722	0.6072	1	10964	2	0.53326	4	0.0079242	0.02699	0.695104	749	3	1.2331
LSMEM2	3	4	0.1284	0.26641	1	4584	3	0.88389	4	0.71095	0.75623	1	14578	1	0.23058	4	0.66861	0.73139	1	13829	1	0.42818	4	0.007985	0.027185	0.699229	750	4	0.633
ZNF260	19	4	0.32135	0.48041	1	8557	2	0.38432	4	0.71757	0.75981	1	14679	1	-0.5278	4	0.0037424	0.013126	0.84983	304	2	0.70771	4	0.0079961	0.027228	0.699449	751	2	0.58321
LIPJ	10	4	0.15238	0.3057	1	5190	3	0.83138	4	0.11618	0.24611	1	4235	2	0.83141	4	0.92226	0.92215	1	18415	0	-0.10883	4	0.0080107	0.02727	0.699517	752	4	0.80774
CYP1A2	15	4	0.20759	0.37475	1	6427	2	0.4285	4	0.3164	0.47647	1	8669	2	0.67237	4	0.22301	0.38726	1	6821	2	0.61871	4	0.0080304	0.02733	0.699517	753	3	0.90421
ALPK3	15	4	0.52427	0.6709	1	11859	2	0.68222	4	0.40728	0.56102	1	10226	2	0.64836	4	0.74661	0.77451	1	15025	1	0.044563	4	0.0080378	0.027351	0.699517	754	4	0.50174
STAP2	19	4	0.83045	0.83425	1	16438	1	0.53563	4	0.11297	0.24069	1	4136	3	1.1075	4	0.25256	0.41478	1	7373	2	0.76351	4	0.0080436	0.02737	0.699517	755	4	0.94563
NACC1	19	4	0.16327	0.32318	1	5477	1	0.2846	4	0.1089	0.23373	1	4037	2	0.66682	4	0.30388	0.46285	1	8372	2	0.7998	4	0.0080725	0.027458	0.69963	756	3	0.98217
FGF4	11	4	0.34189	0.49954	1	8955	2	0.38955	4	0.20053	0.36935	1	6398	2	0.77076	4	0.043504	0.11481	1	2097	3	1.3692	4	0.0080751	0.027466	0.69963	757	4	1.4422
DLL3	19	4	0.049714	0.127	1	2270	3	1.1565	4	0.047193	0.12256	1	2158	2	1.2915	4	0.001464	0.0052746	0.62466	168	3	2.1818	4	0.0080781	0.027479	0.69963	758	2	-0.23965
OLFM4	13	4	0.13867	0.28354	1	4857	3	0.93227	4	0.46754	0.6176	1	11189	2	0.79965	4	0.062939	0.15143	1	2763	2	0.9495	4	0.008106	0.027557	0.700214	759	4	1.1695
CDC40	6	4	9.4009e-05	0.00034728	0.210325	32	2	1.9887	4	0.41818	0.57124	1	10386	1	-2.5655	4	0.51481	0.66183	1	11894	1	0.6517	4	0.0081451	0.027679	0.701272	760	2	0.10556
EMC10	19	4	0.025274	0.079021	1	1407	4	1.2617	4	0.69654	0.74856	1	14357	1	0.47317	4	0.0052025	0.018061	0.901445	397	2	1.372	4	0.0081544	0.027707	0.701272	761	4	0.92605
SIGLEC12	19	4	0.036588	0.10183	1	1804	2	1.025	4	0.07937	0.18203	1	3188	3	1.5078	4	0.10766	0.23128	1	4022	2	1.0615	4	0.0081675	0.027752	0.701272	762	2	0.44555
GCSAM	3	4	0.56273	0.68629	1	12293	1	0.12969	4	0.35588	0.51303	1	9483	1	0.40329	4	0.71048	0.75345	1	14437	1	0.45938	4	0.0082504	0.028045	0.704661	763	4	0.50373
OR2A7	7	4	0.5737	0.69078	1	12440	1	0.40531	4	0.17126	0.33584	1	5736	2	1.1357	4	0.10344	0.22387	1	3916	1	0.063265	4	0.008265	0.028088	0.704661	764	4	1.0651
NBPF8	1	4	0.8708	0.87045	1	17249	0	0.17797	4	0.095132	0.20978	1	3661	2	0.88901	4	0.038894	0.10583	1	1935	3	1.0474	4	0.0082707	0.028104	0.704661	765	3	1.1623
CT47A5	X	4	0.19821	0.36607	1	6253	2	0.98197	4	0.15742	0.31385	1	5381	2	0.66105	4	0.55742	0.68157	1	12435	1	-0.016279	4	0.0082767	0.02813	0.704661	766	4	0.83152
GAGE1	X	4	0.16586	0.32727	1	5538	2	0.77875	4	0.68897	0.74461	1	14245	1	0.18883	4	0.85162	0.85219	1	16945	1	0.24181	4	0.0082825	0.028151	0.704661	767	4	0.69277
KBTBD3	11	4	0.28915	0.45031	1	7984	1	0.57873	4	0.14545	0.2946	1	5049	2	1.1381	4	0.088253	0.19725	1	3485	3	1.0299	4	0.0082855	0.028164	0.704661	768	4	1.0807
ZNF492	19	4	0.0061741	0.021301	0.844298	505	4	1.7541	4	0.12847	0.26661	1	4568	2	0.54172	4	0.023316	0.073432	1	1331	3	1.5935	4	0.0082943	0.028194	0.704661	769	4	1.0541
AIM1L	18	4	0.24131	0.40594	1	7071	2	0.4935	4	0.030222	0.089586	1	1559	3	1.5496	4	0.14862	0.29958	1	5174	2	0.41097	4	0.008297	0.028202	0.704661	770	3	1.2256
AKR1D1	7	4	0.19021	0.35866	1	6090	2	0.76302	4	0.4318	0.58404	1	10604	2	0.021332	4	0.33579	0.49277	1	8989	2	0.5643	4	0.0083104	0.028241	0.704743	771	4	0.70439
SIX5	19	4	0.0075373	0.02571	0.87352	590	2	1.2726	4	0.010746	0.035909	1	689	1	0.26372	4	0.054078	0.13487	1	2495	2	0.41459	4	0.008321	0.028275	0.704743	772	3	0.97898
ESAM	11	4	0.28253	0.44423	1	7826	2	0.5111	4	0.43534	0.5873	1	10667	2	0.65347	4	0.86723	0.86697	1	17248	1	0.53748	4	0.0083486	0.028358	0.705351	773	4	0.90103
GLRX	5	4	0.38237	0.53713	1	9604	2	0.52484	4	0.083532	0.18936	1	3311	3	1.2193	4	0.085428	0.19216	1	3419	3	1.1415	4	0.0083522	0.02837	0.705351	774	3	0.96456
ZDHHC22	14	4	0.005872	0.020318	0.836593	486	4	1.1604	4	0.48319	0.63226	1	11435	2	0.75508	4	0.31062	0.4692	1	8500	1	0.33868	4	0.0083814	0.028466	0.706627	775	4	1.0819
GMFG	19	4	0.0052669	0.018271	0.829423	442	3	2.0079	4	0.053415	0.1343	1	2364	3	1.6125	4	0.2645	0.42599	1	7609	2	0.65187	4	0.0083888	0.028491	0.706627	776	3	1.5424
PLD3	19	4	0.0424	0.11316	1	2016	3	1.0511	4	0.10718	0.23082	1	3991	2	0.32223	4	0.017418	0.056205	1	1042	2	1.0615	4	0.008427	0.02861	0.707823	777	3	1.1419
HOXC6	12	4	0.045478	0.11904	1	2100	3	1.4605	4	0.45531	0.60603	1	10998	2	0.75388	4	0.5096	0.65684	1	11819	2	0.50658	4	0.0084552	0.028694	0.708151	778	4	1.2416
CLDN11	3	4	0.8357	0.83855	1	16543	1	0.69631	4	0.096519	0.21222	1	3691	2	0.92532	4	0.34729	0.50357	1	9252	2	0.56824	4	0.0084626	0.028722	0.708151	779	4	1.0928
TEX101	19	4	0.2794	0.44134	1	7772	2	0.44301	4	0.013757	0.045094	1	849	3	1.6992	4	0.43199	0.58339	1	10562	2	0.0010983	4	0.0084729	0.028761	0.708151	780	2	-0.14294
MSH4	1	4	0.37552	0.53078	1	9494	2	0.77038	4	0.056047	0.13921	1	2448	3	1.0518	4	0.091736	0.20335	1	3577	3	1.0773	4	0.0084744	0.028764	0.708151	781	3	1.0257
C9orf47	9	4	0.81036	0.81844	1	16084	1	0.31488	4	0.36308	0.51974	1	9578	2	0.69003	4	0.51438	0.66142	1	11889	1	0.31773	4	0.008488	0.028807	0.708312	782	4	0.89993
SERPINF1	17	4	0.30928	0.46908	1	8336	2	0.77688	4	0.068326	0.16209	1	2868	2	0.99194	4	0.024321	0.076309	1	1372	4	1.1049	4	0.0085285	0.028931	0.708312	783	3	1.2358
RRAS	19	4	0.14962	0.30129	1	5120	2	-1.9027	4	0.24575	0.41096	1	7240	2	-1.1586	4	0.010882	0.036309	1	714	3	1.6752	4	0.0085301	0.028935	0.708312	784	2	-0.52903
ZNF112	19	4	0.17645	0.34393	1	5791	2	0.93774	4	0.01336	0.043877	1	829	3	1.8374	4	0.3098	0.46838	1	8480	1	0.57812	4	0.008531	0.028939	0.708312	785	3	1.3344
DMRTC2	19	4	0.016839	0.054469	1	1032	1	-0.2888	4	0.099624	0.21772	1	3764	3	1.2547	4	0.14002	0.28563	1	4923	3	0.83746	4	0.008533	0.028947	0.708312	786	2	0.19986
WNT8B	10	4	0.42342	0.57584	1	10244	1	0.56893	4	0.1649	0.32578	1	5580	2	1.0649	4	0.2022	0.36795	1	6433	2	0.060934	4	0.0085553	0.029026	0.709388	787	4	0.58976
NEURL1B	5	4	0.11029	0.23604	1	4107	2	1.0582	4	0.30618	0.46696	1	8454	2	0.75731	4	0.014666	0.04789	1	914	4	1.0283	4	0.0085754	0.0291	0.710297	788	3	1.4788
QPCTL	19	4	0.0069006	0.02365	0.861754	550	3	2.1912	4	1.7501e-05	6.8668e-05	0.122834	11	3	2.9215	4	0.14355	0.2913	1	5024	1	-0.99532	4	0.008586	0.029134	0.710297	789	3	1.2348
ARMC6	19	4	0.45433	0.60486	1	10722	2	0.62814	4	0.021677	0.068715	1	1226	3	1.7828	4	0.03012	0.088522	1	1599	2	-0.099506	4	0.0086026	0.029184	0.710672	790	3	1.1136
MFSD5	12	4	0.50632	0.65387	1	11560	2	0.16533	4	0.503	0.65081	1	11782	1	0.10781	4	0.25589	0.41793	1	7430	2	0.78235	4	0.0086442	0.029322	0.713153	791	4	0.69932
MAP3K10	19	4	0.0015441	0.0055572	0.567397	197	3	2.0694	4	0.0014868	0.0053475	0.640235	167	4	1.7874	4	0.17178	0.3366	1	5802	2	0.22381	4	0.008691	0.029478	0.716082	792	3	1.2076
MTMR3	22	4	0.11127	0.23772	1	4125	2	0.85446	4	0.31979	0.47961	1	8748	2	0.76277	4	0.21478	0.37966	1	6669	2	-0.23551	4	0.0087719	0.029748	0.718701	793	4	0.87513
CTC1	17	4	0.0066527	0.022849	0.856966	534	3	1.8313	4	0.039534	0.10788	1	1885	3	1.4152	4	0.41284	0.56522	1	10264	2	0.86828	4	0.008772	0.029748	0.718701	794	3	1.2525
C5orf47	5	4	0.2761	0.43829	1	7719	2	0.80047	4	0.98522	0.9853	1	19687	0	-0.44627	4	0.44539	0.59595	1	10770	2	0.38005	4	0.0087765	0.029764	0.718701	795	4	0.62088
MAGEA3	X	4	0.28823	0.44943	1	7953	2	0.66246	4	0.077609	0.17884	1	3135	3	1.2639	4	0.099727	0.21746	1	3805	3	1.0318	4	0.0088127	0.029871	0.719474	796	3	0.95559
AMBP	9	4	0.17486	0.34146	1	5755	3	0.9584	4	0.49904	0.64709	1	11709	2	0.84737	4	0.1393	0.28446	1	4893	2	0.8028	4	0.0088224	0.029906	0.719474	797	4	0.76274
CDK5RAP2	9	4	0.080625	0.18408	1	3263	3	1.1413	4	0.20344	0.37205	1	6452	2	0.71915	4	0.51114	0.65831	1	11847	2	0.25668	4	0.00883	0.029931	0.719474	798	3	1.0873
EFNB3	17	4	0.075196	0.17429	1	3092	3	1.3074	4	0.22021	0.3875	1	6763	2	0.77004	4	0.032326	0.0929	1	1686	3	1.4055	4	0.0088451	0.029988	0.719474	799	3	1.2173
SRP54	14	4	0.23779	0.4027	1	7001	1	0.32594	4	0.074796	0.17375	1	3046	2	0.6955	4	0.073482	0.17084	1	3098	2	0.88678	4	0.0088509	0.030003	0.719474	800	2	-0.40729
C1QBP	19	4	0.00063429	0.0023172	0.440957	105	2	-1.2728	4	0.044832	0.11811	1	2065	2	-1.4046	4	0.035231	0.098625	1	1800	1	-0.13384	4	0.0089082	0.030175	0.722225	801	2	-0.99882
IPO13	1	4	0.67385	0.73592	1	13810	1	0.138	4	0.89873	0.89851	1	17917	0	0.35393	4	0.068903	0.16255	1	2949	3	1.0808	4	0.0089149	0.030197	0.722225	802	4	0.89661
GATA6	18	4	0.019979	0.063743	1	1155	4	1.0251	4	0.4066	0.56038	1	10219	1	0.025982	4	0.27596	0.43674	1	7828	2	0.18111	4	0.0089363	0.030259	0.722355	803	3	1.0532
ERI1	8	4	0.42672	0.57891	1	10293	2	0.68221	4	0.511	0.65829	1	11916	1	0.55479	4	0.38049	0.5346	1	9757	2	0.45306	4	0.0089412	0.030275	0.722355	804	4	0.82487
ATG101	12	4	0.017187	0.055509	1	1047	4	1.2387	4	0.35979	0.51671	1	9542	1	0.1379	4	0.47717	0.62625	1	11289	2	0.34908	4	0.0090177	0.030503	0.726082	805	3	1.0491
FBXO17	19	4	0.14964	0.30132	1	5121	2	-0.090061	4	0.0058116	0.020101	0.962383	415	2	0.95759	4	0.0057525	0.019918	0.940466	420	4	1.6652	4	0.0091048	0.030783	0.729037	806	3	1.409
SHBG	17	4	0.04602	0.12007	1	2127	3	1.3831	4	0.52442	0.67105	1	12132	1	0.75558	4	0.0167	0.05405	1	1014	1	-2.4421	4	0.0091055	0.030785	0.729037	807	2	-0.59206
DDX41	5	4	0.082078	0.18664	1	3303	2	0.46099	4	0.3306	0.48978	1	8985	1	0.3458	4	0.24127	0.40428	1	7152	2	0.52328	4	0.0091074	0.030792	0.729037	808	3	1.0888
KLK1	19	4	0.00058659	0.0021484	0.423099	101	3	1.9293	4	0.011503	0.038216	1	731	1	-1.5896	4	0.0029258	0.01035	0.81145	250	3	2.0906	4	0.0091158	0.030816	0.729037	809	3	0.89151
ZNF616	19	4	0.076619	0.17686	1	3132	3	1.1712	4	0.067826	0.16119	1	2856	2	0.82137	4	0.12228	0.25604	1	4425	1	0.48943	4	0.0091241	0.030845	0.729037	810	4	1.2182
C6orf7	6	4	0.19885	0.36665	1	6261	1	-2.754	4	0.42942	0.5818	1	10566	1	0.84226	4	0.082805	0.18758	1	3348	2	0.50086	4	0.0091659	0.030977	0.730105	811	2	-0.5386
ZNF225	19	4	0.032929	0.094626	1	1684	2	0.56846	4	0.0036877	0.012944	0.87892	291	3	2.2135	4	0.21954	0.38407	1	6750	2	0.86127	4	0.0091688	0.030983	0.730105	812	3	1.4812
OLIG1	21	4	0.27572	0.43794	1	7712	2	0.72197	4	0.64372	0.72261	1	13622	1	0.29408	4	0.0056575	0.019577	0.936914	414	3	1.7248	4	0.0091744	0.030999	0.730105	813	3	1.1735
CHRM4	11	4	0.79051	0.80407	1	15692	1	0.10453	4	0.62048	0.71198	1	13308	1	0.33467	4	0.11599	0.24548	1	4228	3	1.0731	4	0.0092062	0.031097	0.731567	814	4	0.62932
ERV3-1	7	4	0.16772	0.33019	1	5576	2	0.91322	4	0.58961	0.69867	1	12926	1	0.13399	4	0.77666	0.79356	1	15536	1	-0.1807	4	0.0092193	0.031135	0.731592	815	3	0.73165
SF3B3	16	4	0.49273	0.64109	1	11333	2	0.85114	4	0.24513	0.4104	1	7231	1	-0.36302	4	0.016443	0.053304	1	1002	4	1.5089	4	0.0092714	0.031307	0.733436	816	4	1.2828
PRR12	19	4	0.0032603	0.011491	0.726804	317	3	1.9972	4	0.19687	0.366	1	6319	2	0.74792	4	0.11546	0.24459	1	4210	2	0.29281	4	0.0092747	0.031312	0.733436	817	3	0.55722
SLC38A4	12	4	0.48025	0.6294	1	11125	1	-0.14384	4	0.017613	0.056779	1	1034	2	1.5181	4	0.10072	0.21922	1	3832	2	0.69332	4	0.0092846	0.031344	0.733436	818	3	1.2986
ACD	16	4	0.39275	0.54687	1	9761	1	0.2097	4	0.33333	0.49227	1	9024	2	0.5539	4	0.28577	0.44581	1	8024	2	0.59973	4	0.0092937	0.031371	0.733436	819	4	0.84337
IFNA4	9	4	0.01278	0.042092	0.987921	850	4	1.6819	4	0.1693	0.33274	1	5694	2	0.11145	4	0.29501	0.45438	1	8196	2	0.64212	4	0.0093097	0.031422	0.733436	820	4	0.89755
USP43	17	4	0.50506	0.65268	1	11534	1	0.41551	4	0.084782	0.19153	1	3345	2	0.49254	4	0.045633	0.11886	1	2167	2	0.78641	4	0.0093241	0.031466	0.733436	821	4	0.49872
ZRANB1	10	4	0.050304	0.12811	1	2292	3	1.2973	4	0.30683	0.46755	1	8463	1	-0.024506	4	0.088509	0.19771	1	3493	2	0.55668	4	0.0093251	0.031468	0.733436	822	3	1.0232
SIRT2	19	4	0.011804	0.039107	0.958762	813	3	2.1518	4	0.020747	0.065999	1	1179	2	1.176	4	0.1752	0.34196	1	5896	3	1.1552	4	0.0093537	0.03156	0.734719	823	3	1.8204
SMIM10	X	4	0.55258	0.68232	1	12180	1	0.51141	4	0.21485	0.38256	1	6661	2	0.90514	4	0.80867	0.81643	1	16128	1	-0.098082	4	0.0093754	0.031635	0.735331	824	4	0.63812
MRPS30	5	4	0.15995	0.31786	1	5397	3	0.99024	4	0.23131	0.39766	1	6969	2	1.0146	4	0.86121	0.8612	1	17145	1	0.38522	4	0.0093835	0.031659	0.735331	825	4	0.95058
FAM120A	9	4	0.043462	0.11521	1	2048	3	0.79636	4	0.25645	0.42095	1	7430	2	0.68852	4	0.87124	0.87088	1	17343	0	0.35073	4	0.0093947	0.031697	0.735351	826	4	0.68809
UBR1	15	4	0.39142	0.5456	1	9741	2	0.80546	4	0.8822	0.8819	1	17595	0	0.50185	4	0.021573	0.068411	1	1245	2	1.2203	4	0.0094949	0.032006	0.738316	827	4	0.97574
NMRK2	19	4	0.1451	0.29394	1	5007	2	0.10729	4	0.61683	0.71038	1	13264	1	-0.015897	4	0.032239	0.092726	1	1678	3	1.365	4	0.0095176	0.032077	0.738316	828	4	0.89186
TRIM38	6	4	0.011151	0.037145	0.947418	782	3	1.8477	4	0.58455	0.69656	1	12872	1	0.40961	4	0.51784	0.66472	1	11943	1	0.62242	4	0.0095193	0.03208	0.738316	829	4	1.3415
MROH2B	5	4	0.022135	0.070027	1	1259	4	1.0277	4	0.11923	0.25124	1	4316	3	1.0856	4	0.43164	0.58305	1	10557	1	-0.3879	4	0.009542	0.032161	0.738316	830	4	1.0077
C11orf98	11	4	0.48407	0.63297	1	11191	2	0.32426	4	0.24419	0.40951	1	7215	2	1.091	4	0.49039	0.63872	1	11493	2	0.64478	4	0.0095534	0.032197	0.738316	831	4	1.0037
OR6V1	7	4	0.061996	0.15007	1	2670	2	0.50989	4	0.50642	0.65402	1	11831	1	0.2839	4	0.34033	0.49703	1	9104	2	0.73225	4	0.0095551	0.032202	0.738316	832	4	0.48421
CCDC154	16	4	0.14905	0.30037	1	5099	3	0.98401	4	0.69441	0.74743	1	14325	1	0.029092	4	0.17967	0.34696	1	5975	2	0.72127	4	0.0095563	0.032208	0.738316	833	3	0.9832
DOK6	18	4	0.35249	0.50929	1	9162	1	0.068061	4	0.073941	0.17221	1	3021	3	1.1884	4	0.89672	0.89652	1	17874	0	-0.03343	4	0.0095643	0.032235	0.738316	834	3	0.859
SRPR	11	4	0.24068	0.40536	1	7053	1	-0.44652	4	0.10123	0.22052	1	3803	3	1.1167	4	0.03872	0.1055	1	1926	3	1.1554	4	0.0095652	0.032239	0.738316	835	2	0.79668
RER1	1	4	0.09909	0.21666	1	3809	3	1.1141	4	0.86197	0.86208	1	17198	1	0.54411	4	0.90805	0.90788	1	18108	0	0.10267	4	0.0095665	0.032245	0.738316	836	4	0.46788
LHX8	1	4	0.15276	0.30628	1	5197	3	1.183	4	0.22142	0.38856	1	6789	1	0.10541	4	0.14066	0.28669	1	4937	3	1.0246	4	0.0095877	0.032297	0.738316	837	4	1.3837
CDHR3	7	4	0.25985	0.42317	1	7402	2	0.66638	4	0.10047	0.21919	1	3791	3	1.3711	4	0.41627	0.56848	1	10312	1	-0.091235	4	0.009645	0.032474	0.738316	838	4	0.76517
TNFRSF11A	18	4	0.015729	0.051143	1	972	3	1.8328	4	0.052659	0.13281	1	2339	3	1.3101	4	0.98708	0.98716	1	19714	0	-0.31445	4	0.0096582	0.032525	0.738316	839	4	0.96691
COX4I2	20	4	0.23765	0.40258	1	6996	2	0.78062	4	0.58148	0.69532	1	12831	1	0.23228	4	0.29081	0.45053	1	8118	2	0.5208	4	0.0096948	0.032635	0.738316	840	3	1.0463
MIS12	17	4	0.039329	0.1072	1	1897	3	1.5558	4	0.11585	0.24557	1	4225	3	1.0417	4	0.34132	0.49795	1	9127	2	0.32179	4	0.0097081	0.032676	0.738316	841	3	1.0863
KRTAP4-8	17	4	0.03254	0.093862	1	1671	3	1.3727	4	0.33562	0.49432	1	9084	1	-0.004654	4	0.27901	0.43958	1	7888	2	0.49574	4	0.0097135	0.032697	0.738316	842	3	0.94931
MEF2B	19	4	0.20058	0.36827	1	6293	2	0.81547	4	0.041969	0.11261	1	1974	3	1.5293	4	0.435	0.58618	1	10616	2	0.45665	4	0.0097323	0.032752	0.738316	843	3	1.2174
TCEAL4	X	4	0.66024	0.72926	1	13619	1	0.072619	4	0.17648	0.34397	1	5852	2	0.90578	4	0.21626	0.38102	1	6698	2	0.85569	4	0.0097373	0.032771	0.738316	844	4	0.82445
VTI1B	14	4	0.076007	0.1758	1	3116	1	0.41054	4	0.18471	0.35474	1	6062	2	1.1012	4	0.89289	0.89261	1	17789	0	0.018898	4	0.0097489	0.032806	0.738316	845	4	0.83863
WBSCR27	7	4	0.8991	0.89889	1	17836	0	0.43993	4	0.051948	0.13147	1	2309	3	1.515	4	0.093711	0.20686	1	3636	1	-0.24575	4	0.0097687	0.032866	0.738316	846	4	0.94179
FUT2	19	4	0.10308	0.22352	1	3918	2	0.89096	4	0.78821	0.80298	1	15837	1	0.25922	4	0.11141	0.23773	1	4121	3	1.0683	4	0.0098048	0.03298	0.738316	847	3	1.0718
HIST1H2BO	6	4	0.35559	0.51219	1	9211	2	0.75844	4	0.055176	0.1376	1	2419	2	0.53996	4	0.80908	0.81674	1	16137	1	0.49757	4	0.0098144	0.033008	0.738316	848	2	0.72893
KRTAP9-2	17	4	0.81413	0.82129	1	16137	1	0.096883	4	0.11624	0.24624	1	4238	2	1.1281	4	0.51087	0.65806	1	11843	1	0.41195	4	0.0098202	0.033028	0.738316	849	4	0.89657
CCDC106	19	4	0.21685	0.38331	1	6609	2	0.72021	4	0.15196	0.30509	1	5232	2	1.1953	4	0.16957	0.33314	1	5743	3	0.8825	4	0.009821	0.03303	0.738316	850	3	1.2169
RIC1	9	4	0.11245	0.23971	1	4152	2	-0.65787	4	0.071614	0.16804	1	2960	2	1.0948	4	0.038965	0.10598	1	1940	2	0.89843	4	0.0098432	0.033099	0.738316	851	3	1.1228
CRIP2	14	4	0.17119	0.33573	1	5662	2	0.56633	4	0.78958	0.80393	1	15866	0	-0.033169	4	0.84041	0.84214	1	16728	0	0.23722	4	0.0098524	0.033127	0.738316	852	3	0.78363
HSPB6	19	4	0.0024115	0.008599	0.671073	257	3	2.0731	4	0.41442	0.56767	1	10332	1	-0.67608	4	0.012868	0.042352	1	822	3	1.5341	4	0.0098633	0.033159	0.738316	853	3	1.5407
TRAPPC2	X	4	0.50865	0.65605	1	11598	2	0.53403	4	0.1367	0.28039	1	4790	3	1.4216	4	0.047207	0.12184	1	2220	2	1.1267	4	0.0098723	0.033191	0.738316	854	4	1.0461
FKBP1B	2	4	0.070803	0.16636	1	2949	3	1.0815	4	0.23865	0.4045	1	7099	2	1.0158	4	0.89436	0.8941	1	17822	0	0.27964	4	0.0098769	0.033203	0.738316	855	4	0.79
OR10H2	19	4	0.35806	0.51452	1	9253	1	0.34057	4	0.26125	0.42536	1	7528	2	0.78168	4	0.33354	0.49073	1	8931	2	-0.16311	4	0.0099003	0.033267	0.738316	856	4	0.55191
CTR9	11	4	0.0060472	0.02088	0.841436	497	3	1.6369	4	0.059144	0.14501	1	2553	3	1.0617	4	0.89368	0.89339	1	17808	0	0.067957	4	0.0099021	0.033273	0.738316	857	3	1.1014
ATP13A2	10	4	0.44598	0.59695	1	10586	1	0.49732	4	0.071041	0.16699	1	2945	3	1.4099	4	0.43089	0.58235	1	10546	2	0.53345	4	0.0099037	0.033276	0.738316	858	4	0.94911
FRY	13	4	0.98234	0.98245	1	19585	0	-0.85799	4	0.0049861	0.017352	0.944028	364	4	1.8005	4	0.91552	0.91543	1	18275	0	0.35556	4	0.0099054	0.03328	0.738316	859	4	0.68845
MIEF2	17	4	0.594	0.69917	1	12705	1	0.24089	4	0.32071	0.48048	1	8771	2	0.3083	4	0.87671	0.87634	1	17469	0	0.55999	4	0.0099087	0.033289	0.738316	860	4	0.45255
OR6K3	1	4	0.12682	0.26381	1	4544	1	0.16923	4	0.4539	0.60471	1	10969	2	0.72951	4	0.86766	0.86737	1	17257	1	0.32514	4	0.0099121	0.033303	0.738316	861	4	0.79403
GNRH1	8	4	0.16521	0.32623	1	5528	2	0.74897	4	0.0037757	0.013243	0.883265	295	3	2.1173	4	0.039774	0.10755	1	1971	3	1.4552	4	0.0099124	0.033305	0.738316	862	2	0.18336
RABEP2	16	4	0.18851	0.35706	1	6056	2	0.99281	4	0.32928	0.48856	1	8964	2	0.51748	4	0.40209	0.55508	1	10081	1	-0.18608	4	0.0099292	0.033356	0.738316	863	3	1.0563
APEX2	X	4	0.17345	0.33923	1	5718	3	0.85693	4	0.48074	0.63	1	11396	1	0.48896	4	0.14397	0.29201	1	5033	3	0.75787	4	0.0099574	0.033446	0.738316	864	4	0.64242
CACUL1	10	4	0.035107	0.098887	1	1761	3	1.5616	4	0.45992	0.61035	1	11072	2	0.74169	4	0.49023	0.63857	1	11489	2	0.67766	4	0.0099727	0.033505	0.738316	865	3	1.21
SMG9	19	4	0.040287	0.10907	1	1949	1	-0.96456	4	0.0029969	0.010607	0.811222	258	3	2.0118	4	0.036943	0.10198	1	1865	3	1.301	4	0.0099739	0.033508	0.738316	866	2	0.1701
TTC37	5	4	0.0086264	0.029263	0.907662	638	1	-4.6841	4	0.048321	0.12461	1	2196	1	-5.2121	4	0.092502	0.20471	1	3601	2	-1.995	4	0.0099888	0.033564	0.738316	867	1	-4.3558
MN1	22	4	0.31419	0.47371	1	8425	2	0.45435	4	0.056015	0.13914	1	2447	3	1.431	4	0.080662	0.18381	1	3302	3	1.2531	4	0.0099918	0.033568	0.738316	868	3	1.2052
CEP131	17	4	0.020403	0.065005	1	1173	3	1.4379	4	0.83603	0.83906	1	16722	0	0.51488	4	0.14049	0.2864	1	4934	3	0.94694	4	0.0099973	0.033586	0.738316	869	3	1.0953
RNF25	2	4	0.12755	0.26502	1	4564	3	0.89801	4	0.85516	0.85574	1	17069	1	0.75665	4	0.80238	0.81177	1	16014	1	0.24457	4	0.0099978	0.033587	0.738316	870	4	0.73148
VCY	Y	4	0.46579	0.61575	1	10881	1	0.61463	4	0.143	0.29064	1	4987	2	0.21643	4	0.80682	0.81503	1	16088	0	-0.10931	4	0.010047	0.033734	0.740349	871	3	0.78034
CLUL1	18	4	0.037577	0.10375	1	1837	3	1.5089	4	0.049931	0.12768	1	2247	3	1.409	4	0.295	0.45437	1	8195	2	0.15381	4	0.01006	0.033771	0.740349	872	3	1.3553
POLR2F	22	4	0.020149	0.064257	1	1161	2	0.80121	4	0.010575	0.035351	1	678	4	1.4536	4	0.36102	0.51634	1	9463	2	0.43679	4	0.010069	0.033792	0.740349	873	4	1.3196
CYP2B6	19	4	0.02714	0.0831	1	1469	3	1.4917	4	0.0010986	0.0039717	0.581986	135	3	2.1184	4	0.058374	0.14289	1	2630	2	0.74308	4	0.010079	0.033826	0.740349	874	3	1.5291
ITGA5	12	4	0.1005	0.21909	1	3844	1	0.28362	4	0.31068	0.47119	1	8539	2	0.9747	4	0.038912	0.10587	1	1936	2	0.36127	4	0.010097	0.033884	0.740815	875	3	0.87053
C1orf194	1	4	0.44341	0.59453	1	10550	2	0.79264	4	0.12298	0.25753	1	4411	2	0.64051	4	0.51991	0.6667	1	11987	2	0.67795	4	0.010153	0.034054	0.742816	876	3	1.0742
TRMT6	20	4	0.22494	0.39076	1	6752	2	0.66257	4	0.072821	0.17021	1	2989	2	-2.0132	4	0.013758	0.045097	1	868	3	1.2439	4	0.010166	0.034087	0.742816	877	2	-0.13398
NOTCH1	9	4	0.15262	0.30608	1	5194	2	0.52473	4	0.31671	0.47676	1	8677	2	1.0019	4	0.19716	0.36325	1	6338	2	0.6814	4	0.010184	0.034139	0.743158	878	3	0.8022
CTRL	16	4	0.72815	0.76496	1	14602	1	0.57059	4	0.015558	0.050642	1	940	3	1.6258	4	0.47318	0.62245	1	11226	2	0.12385	4	0.010203	0.034195	0.7432	879	3	1.0863
HMOX2	16	4	0.21173	0.37859	1	6518	2	0.65706	4	0.00014906	0.00054959	0.315842	34	4	2.1778	4	0.51719	0.66412	1	11938	2	0.57033	4	0.010209	0.034215	0.7432	880	2	0.81605
CRTAC1	10	4	0.55169	0.68197	1	12166	1	0.085877	4	0.13906	0.28427	1	4868	2	1.1659	4	0.16363	0.32371	1	5599	2	-2.1565	4	0.010222	0.034256	0.743285	881	2	0.13781
ADGRG5	16	4	0.087907	0.19693	1	3483	2	1.2237	4	0.42582	0.57843	1	10509	2	-0.34643	4	0.12162	0.25494	1	4398	3	1.0996	4	0.010272	0.03441	0.745823	882	2	0.63424
DNAJC25-GNG10	9	4	0.062205	0.15047	1	2680	3	0.84897	4	0.54082	0.6793	1	12346	1	0.19842	4	0.81508	0.82132	1	16257	0	-0.16362	4	0.010327	0.034582	0.746657	883	3	0.75834
C5AR1	8	4	0.37079	0.52632	1	9434	2	0.70342	4	0.42132	0.57419	1	10434	2	0.48168	4	0.098683	0.21563	1	3780	2	0.78531	4	0.010334	0.034599	0.746657	884	3	0.90452
KCNK13	14	4	0.33664	0.49462	1	8855	1	-0.338	4	0.14196	0.28894	1	4954	3	0.95813	4	0.29851	0.45775	1	8267	1	-0.25892	4	0.010357	0.034671	0.746657	885	4	0.55433
PHLDA1	12	4	0.12898	0.26736	1	4598	2	0.68325	4	0.024527	0.076877	1	1351	3	1.5131	4	0.1007	0.21919	1	3831	2	1.0636	4	0.01037	0.034715	0.746657	886	4	1.1475
EDN3	20	4	0.4755	0.62495	1	11046	2	0.49025	4	0.13836	0.28311	1	4842	1	0.015471	4	0.67433	0.73427	1	13910	1	0.012564	4	0.010377	0.034734	0.746657	887	4	0.35681
CBLN1	16	4	0.037846	0.10428	1	1846	3	1.4896	4	0.23402	0.40019	1	7015	2	0.76727	4	0.39019	0.5437	1	9907	1	0.15511	4	0.010392	0.034789	0.746657	888	3	1.2199
ATP6V1C2	11	4	0.1688	0.33192	1	5603	2	1.0636	4	0.24706	0.41216	1	7268	1	0.33302	4	0.072452	0.16897	1	3064	2	0.7443	4	0.010397	0.034801	0.746657	889	3	0.96449
AP3D1	19	4	0.16935	0.3328	1	5619	2	0.66328	4	0.85924	0.85953	1	17133	1	0.46233	4	0.37712	0.53138	1	9701	2	0.62188	4	0.010431	0.034902	0.746657	890	4	0.67938
BCL11A	2	4	0.77321	0.79237	1	15388	1	0.43772	4	0.40081	0.55499	1	10126	2	0.73736	4	0.28346	0.44369	1	7984	2	0.77005	4	0.010456	0.03498	0.746657	891	4	0.76622
RABIF	1	4	0.37687	0.53199	1	9516	2	0.4339	4	0.28169	0.44427	1	7941	2	0.91052	4	0.34045	0.49714	1	9105	2	0.73199	4	0.010459	0.034991	0.746657	892	3	1.192
TGIF2LX	X	4	0.3962	0.55012	1	9825	2	0.89133	4	0.089539	0.19994	1	3496	2	-0.19876	4	0.31468	0.47299	1	8585	2	0.41816	4	0.010466	0.035012	0.746657	893	2	-0.44423
ORMDL2	12	4	0.13799	0.28245	1	4832	2	1.0847	4	0.46568	0.61587	1	11164	2	0.80407	4	0.32342	0.48119	1	8747	1	0.033046	4	0.010471	0.035029	0.746657	894	4	1.0174
BCAM	19	4	0.01949	0.062334	1	1130	3	1.3638	4	0.036939	0.10279	1	1787	3	1.5692	4	0.018187	0.058461	1	1075	3	1.7982	4	0.010492	0.035097	0.746657	895	2	0.59627
IGFALS	16	4	0.096262	0.21163	1	3724	3	1.036	4	0.70168	0.75123	1	14447	1	0.37968	4	0.094537	0.20831	1	3653	3	0.97277	4	0.010498	0.03511	0.746657	896	4	1.0121
PRDM9	5	4	0.19217	0.36049	1	6135	2	0.82266	4	0.010619	0.035495	1	681	2	1.0768	4	0.032392	0.093021	1	1689	3	1.0851	4	0.01051	0.035143	0.746657	897	3	1.3055
IRX5	16	4	0.01008	0.033829	0.922013	733	3	1.6966	4	0.103	0.22353	1	3862	2	1.1374	4	0.091002	0.20203	1	3557	1	0.27195	4	0.010513	0.035154	0.746657	898	3	1.259
E2F7	12	4	0.12345	0.25822	1	4442	3	1.016	4	0.023522	0.074025	1	1310	4	1.0827	4	0.96958	0.9696	1	19360	0	-0.084777	4	0.010533	0.03522	0.747279	899	3	1.0712
SENP5	3	4	0.030787	0.09038	1	1602	3	0.99687	4	0.68492	0.74249	1	14187	1	-0.20798	4	0.019715	0.062972	1	1146	2	1.0834	4	0.010561	0.035307	0.747638	900	3	1.0539
KPRP	1	4	0.17462	0.34107	1	5750	2	0.71699	4	0.62556	0.71427	1	13373	1	-0.23024	4	0.065684	0.15662	1	2849	3	1.0834	4	0.010566	0.035322	0.747638	901	4	0.9164
LGALS7B	19	4	0.028899	0.086671	1	1526	2	0.5546	4	0.0060478	0.020883	0.962383	431	3	1.995	4	0.032919	0.094073	1	1704	3	1.4835	4	0.010598	0.035428	0.747638	902	3	1.1236
C19orf71	19	4	0.36988	0.52551	1	9420	2	0.78946	4	0.15513	0.31016	1	5309	3	0.94531	4	0.051311	0.12955	1	2380	2	0.96054	4	0.010605	0.035448	0.747638	903	3	1.0185
IRF5	7	4	0.91576	0.91569	1	18210	0	-0.12147	4	0.9222	0.92208	1	18384	0	0.3958	4	0.35325	0.50908	1	9352	1	0.07114	4	0.010624	0.035511	0.747638	904	4	0.39411
DEFA5	8	4	0.79298	0.80575	1	15734	1	0.17703	4	0.045585	0.11953	1	2093	3	1.687	4	0.50578	0.65329	1	11753	2	0.65258	4	0.01064	0.035566	0.747638	905	3	1.0374
CD3EAP	19	4	0.0082721	0.02811	0.904272	622	2	1.481	4	0.00024173	0.00088333	0.359406	48	4	2.0392	4	0.028909	0.086139	1	1548	2	-0.76425	4	0.010651	0.035599	0.747638	906	3	0.35272
ZIM2	19	4	0.2501	0.41402	1	7235	2	0.99935	4	0.01749	0.056417	1	1030	4	1.3088	4	0.078436	0.17977	1	3239	2	0.16286	4	0.010663	0.035633	0.747638	907	3	1.0432
DNAH2	17	4	0.075902	0.17561	1	3114	2	0.90295	4	0.14217	0.28927	1	4966	2	0.73189	4	0.017989	0.057911	1	1068	3	1.5353	4	0.010669	0.035654	0.747638	908	4	1.1295
ADAMDEC1	8	4	0.045125	0.11839	1	2093	2	1.1009	4	0.011486	0.038159	1	729	3	1.9447	4	0.11032	0.23585	1	4087	2	0.78218	4	0.010675	0.035672	0.747638	909	3	1.2871
B9D2	19	4	0.087848	0.19682	1	3481	3	1.089	4	0.51369	0.66084	1	11956	1	-0.069638	4	0.028187	0.084693	1	1524	3	1.4923	4	0.010685	0.035718	0.747638	910	3	0.97884
ZBED3	5	4	0.20795	0.37508	1	6433	2	0.79016	4	0.83628	0.83926	1	16727	1	0.56147	4	0.1018	0.22106	1	3864	2	0.8163	4	0.010686	0.03572	0.747638	911	4	0.79578
ERICH4	19	4	0.012881	0.042391	0.991301	852	3	1.4223	4	0.063485	0.1531	1	2715	2	-1.2827	4	0.40306	0.55598	1	10093	1	-0.11008	4	0.010771	0.035978	0.751556	912	2	-0.69154
LY6G6C	6	4	0.25261	0.4164	1	7270	2	0.86257	4	0.2521	0.41684	1	7346	2	0.73228	4	0.24212	0.40505	1	7169	1	0.21742	4	0.01078	0.03601	0.751556	913	4	0.80927
ABHD14B	3	4	0.90201	0.9018	1	17904	0	-0.032138	4	0.28084	0.44352	1	7917	1	0.053932	4	0.01053	0.035214	1	697	4	0.86601	4	0.0108	0.036075	0.751937	914	4	0.60697
SLC26A9	1	4	0.0087944	0.02982	0.907662	654	4	1.2229	4	0.019693	0.062909	1	1129	4	1.5006	4	0.50974	0.65697	1	11825	2	-0.15601	4	0.010857	0.036239	0.752328	915	4	1.155
ZNF497	19	4	0.013238	0.043502	0.996225	871	3	1.6795	4	0.044506	0.11747	1	2056	3	1.312	4	0.24205	0.40499	1	7168	1	-1.6666	4	0.010863	0.036253	0.752328	916	2	-0.38422
CDKN2AIPNL	5	4	0.58403	0.69497	1	12579	1	0.34031	4	0.52943	0.6751	1	12209	1	0.19439	4	0.322	0.47988	1	8721	1	0.14218	4	0.010881	0.036304	0.752328	917	4	0.295
NXT1	20	4	0.6257	0.71308	1	13153	1	0.46539	4	0.92624	0.92617	1	18474	0	-0.03505	4	0.0082299	0.027968	0.993448	556	3	1.4887	4	0.010891	0.036336	0.752328	918	4	0.71289
HAVCR1	5	4	0.82974	0.83365	1	16428	1	-0.17382	4	0.92975	0.92965	1	18532	0	0.22455	4	0.084619	0.19074	1	3402	3	1.0675	4	0.010902	0.036361	0.752328	920	4	0.72495
WASL	7	4	0.028456	0.085765	1	1512	3	1.6259	4	0.1164	0.24651	1	4240	2	0.8527	4	0.17562	0.34262	1	5904	1	0.026146	4	0.010912	0.036388	0.752328	921	3	0.94483
KCNN4	19	4	0.025228	0.078884	1	1404	3	1.7538	4	0.0027426	0.009692	0.78477	242	1	-0.67103	4	0.18642	0.35318	1	6136	2	0.71159	4	0.010916	0.036401	0.752328	922	2	-0.40492
LGSN	6	4	0.73235	0.76735	1	14675	1	0.64916	4	0.27055	0.43393	1	7717	2	0.47077	4	0.25402	0.41617	1	7401	2	0.76391	4	0.01092	0.03642	0.752328	923	3	0.99885
TBRG1	11	4	0.45665	0.60704	1	10755	1	-0.7468	4	0.27949	0.44227	1	7891	2	0.90266	4	0.11618	0.2458	1	4236	2	0.34706	4	0.010923	0.036431	0.752328	924	3	0.8958
OR4D9	11	4	0.035769	0.10023	1	1786	2	-2.1886	4	0.006558	0.022545	0.965845	464	4	1.7212	4	0.058035	0.14227	1	2616	2	0.82162	4	0.010963	0.036551	0.753404	925	2	-0.33716
LCE1B	1	4	0.040791	0.11003	1	1963	3	1.1542	4	0.0081819	0.0278	0.99872	556	4	1.1979	4	0.72261	0.76023	1	14639	1	-0.71265	4	0.01098	0.036603	0.753404	926	4	1.0054
ARL17B	17	4	0.31571	0.47511	1	8464	2	0.69243	4	0.49194	0.64045	1	11587	2	-0.47883	4	0.036202	0.10055	1	1838	2	0.19177	4	0.010989	0.036623	0.753404	927	2	0.48758
FBXO16	8	4	0.060778	0.14777	1	2634	3	1.3436	4	0.14486	0.29364	1	5030	2	1.0194	4	0.0051609	0.017925	0.896865	396	4	1.3861	4	0.010999	0.036652	0.753404	928	3	1.3848
MAD2L2	1	4	0.021007	0.066742	1	1206	2	-1.0432	4	0.26305	0.42702	1	7569	2	0.90369	4	0.79291	0.80479	1	15845	0	0.41335	4	0.011008	0.03669	0.753404	929	2	-0.55894
COX10	17	4	0.9643	0.96438	1	19195	0	-0.024174	4	0.1653	0.3264	1	5591	2	1.0708	4	0.10085	0.21945	1	3837	2	0.97927	4	0.011039	0.036792	0.753404	930	4	1.0527
TMEM33	4	4	0.41245	0.56545	1	10059	2	0.2239	4	0.22627	0.39304	1	6873	2	0.58541	4	0.074038	0.17183	1	3114	3	1.1593	4	0.011059	0.03686	0.753404	931	3	1.1216
SLC6A3	5	4	0.61097	0.70646	1	12936	1	0.34364	4	0.79175	0.80542	1	15903	1	0.74243	4	0.1576	0.31402	1	5451	2	0.79472	4	0.011065	0.036875	0.753404	932	3	1.2143
KLHL3	5	4	0.35172	0.50858	1	9148	2	0.81956	4	0.38717	0.54208	1	9918	1	0.52825	4	0.092502	0.20471	1	3603	1	-0.27646	4	0.011072	0.036901	0.753404	933	3	0.86915
WDR62	19	4	0.26126	0.42446	1	7431	2	0.96686	4	0.019777	0.063143	1	1134	3	1.7231	4	0.31454	0.47285	1	8581	2	0.69304	4	0.011073	0.036902	0.753404	934	3	1.0889
TNFAIP3	6	4	0.12044	0.25316	1	4362	3	0.98124	4	0.27606	0.4391	1	7828	1	0.50827	4	0.071992	0.16814	1	3052	2	1.0251	4	0.011083	0.036932	0.753404	935	4	0.51361
SPATC1	8	4	0.55603	0.68368	1	12224	1	0.3352	4	0.64263	0.72211	1	13606	1	-0.14487	4	0.016545	0.053597	1	1008	4	0.88157	4	0.011127	0.037074	0.755154	936	4	0.82903
SMARCC1	3	4	0.24356	0.40799	1	7112	2	0.50993	4	0.10839	0.23291	1	4022	2	1.1068	4	0.4184	0.57047	1	10345	2	0.71407	4	0.011156	0.037163	0.755154	937	4	1.3186
C5AR2	4	4	0.093275	0.20638	1	3649	2	1.1311	4	0.0023134	0.0082601	0.754738	217	3	1.8817	4	0.023869	0.075058	1	1350	2	-0.91101	4	0.011157	0.037164	0.755154	938	2	-0.1774
MAGEC1	X	4	0.77164	0.79135	1	15355	1	-0.032248	4	0.42686	0.57938	1	10529	2	0.60026	4	0.55479	0.68053	1	12411	1	0.13706	4	0.011182	0.037237	0.755154	939	4	0.3896
OPLAH	8	4	0.65121	0.72493	1	13485	1	0.028728	4	0.020241	0.064513	1	1159	4	1.3564	4	0.14015	0.28585	1	4925	2	0.76606	4	0.011197	0.037276	0.755154	940	3	1.0468
NAPEPLD	7	4	0.58922	0.69714	1	12646	1	0.56596	4	0.30572	0.46653	1	8445	1	0.21796	4	0.73669	0.76848	1	14882	1	0.34147	4	0.011217	0.037343	0.755154	941	4	0.94223
SLC16A1	1	4	0.43339	0.58521	1	10401	1	-0.12522	4	0.44722	0.59839	1	10860	2	0.37291	4	0.048937	0.12504	1	2286	3	1.1723	4	0.011222	0.037361	0.755154	942	4	0.96775
DNAJB8	3	4	0.91173	0.91164	1	18099	0	-0.13863	4	0.57469	0.69261	1	12748	1	0.48438	4	0.046242	0.12003	1	2189	3	1.1427	4	0.011228	0.037376	0.755154	943	3	0.82534
MAGEB16	X	4	0.74062	0.77222	1	14791	1	0.56653	4	0.14873	0.29992	1	5145	3	1.1041	4	0.72242	0.76012	1	14636	1	-0.068275	4	0.011229	0.037381	0.755154	944	3	1.0381
DNAH9	17	4	0.35902	0.51546	1	9265	2	0.5581	4	0.39435	0.5488	1	10036	2	0.7277	4	0.23139	0.39506	1	6964	2	0.72663	4	0.011235	0.037394	0.755154	945	3	1.1024
PSMC4	19	4	0.049513	0.12661	1	2264	3	1.3789	4	0.019602	0.062656	1	1123	3	1.8283	4	0.33794	0.49477	1	9030	2	0.85814	4	0.01127	0.037504	0.756339	946	4	1.2956
DHRS7B	17	4	0.61354	0.70761	1	12973	1	0.20271	4	0.95498	0.95503	1	19046	0	0.20224	4	0.011588	0.038469	1	752	3	1.6556	4	0.011278	0.037527	0.756339	947	4	0.85148
SLC45A2	5	4	0.80224	0.81249	1	15921	1	0.082955	4	0.075935	0.17588	1	3077	1	0.53554	4	0.017775	0.057261	1	1053	3	1.4117	4	0.01132	0.037667	0.756838	949	4	0.86847
MMD2	7	4	0.51953	0.66633	1	11762	2	0.11464	4	0.091434	0.20329	1	3560	3	1.3181	4	0.89125	0.89094	1	17755	0	-0.081823	4	0.011324	0.037678	0.756838	950	4	0.83077
IL13	5	4	0.21747	0.3839	1	6616	2	0.93462	4	0.5145	0.66163	1	11965	2	0.73693	4	0.73653	0.76838	1	14875	1	0.50041	4	0.011331	0.037698	0.756838	951	4	1.0687
PRKD2	19	4	0.0059102	0.020453	0.837006	489	4	1.8625	4	0.80015	0.81143	1	16059	1	0.85063	4	0.046758	0.12101	1	2204	2	1.0458	4	0.011333	0.037703	0.756838	952	3	1.4559
PPM1J	1	4	0.85671	0.85708	1	16954	1	-0.38323	4	0.34592	0.50388	1	9301	2	0.67349	4	0.68279	0.73858	1	14013	1	0.34008	4	0.011344	0.037746	0.756952	953	4	0.56422
RSRP1	1	4	0.79756	0.80906	1	15825	1	-0.096986	4	0.26501	0.42884	1	7605	2	0.63864	4	0.16998	0.33377	1	5752	3	0.64373	4	0.011413	0.03795	0.759524	954	4	0.57883
BMP15	X	4	0.11587	0.24549	1	4245	2	1.0232	4	0.62477	0.71393	1	13361	1	0.0050363	4	0.13652	0.27986	1	4823	3	1.0388	4	0.011477	0.038134	0.76246	955	3	1.0375
SERPINF2	17	4	0.061496	0.14916	1	2655	2	0.8004	4	0.15155	0.30445	1	5222	1	0.2615	4	0.20716	0.37254	1	6533	2	0.68027	4	0.011497	0.038198	0.762981	956	3	0.72818
NANOS1	10	4	0.037893	0.10438	1	1847	2	0.6279	4	0.87783	0.87749	1	17509	0	0.30165	4	0.19217	0.35858	1	6241	2	0.82118	4	0.011563	0.038395	0.766143	957	4	0.96264
CDC42	1	4	0.010014	0.033638	0.921459	730	3	1.665	4	0.25273	0.41744	1	7359	2	-0.43607	4	0.37487	0.52931	1	9665	2	0.69498	4	0.011603	0.038517	0.7665	958	2	0.1793
SNCAIP	5	4	0.015819	0.051413	1	980	1	-0.24835	4	0.053354	0.13417	1	2363	2	0.29124	4	0.15362	0.30758	1	5334	1	-0.90076	4	0.011603	0.038518	0.7665	959	1	0.044163
AGBL4	1	4	0.4992	0.64717	1	11440	1	0.39413	4	0.059672	0.14598	1	2576	3	1.3269	4	0.11338	0.241	1	4169	2	0.10222	4	0.011619	0.038565	0.7665	960	4	0.52494
PILRA	7	4	0.23645	0.40147	1	6973	2	0.67894	4	0.49954	0.64758	1	11714	2	0.74394	4	0.70976	0.75304	1	14424	1	-0.49866	4	0.011655	0.03867	0.767068	961	4	0.50716
MAGEA10	X	4	0.57244	0.69024	1	12421	1	-0.15513	4	0.82122	0.82718	1	16430	1	0.2601	4	0.35265	0.50848	1	9342	2	0.47892	4	0.01172	0.03885	0.769004	962	4	0.78299
WNT9A	1	4	0.528	0.67301	1	11895	1	0.35778	4	0.52682	0.67332	1	12176	2	0.66298	4	0.85617	0.85639	1	17043	1	-0.49635	4	0.011733	0.038883	0.769004	963	4	0.58261
SCGB1C1	11	4	0.044398	0.11698	1	2075	3	1.3971	4	0.29004	0.45195	1	8115	2	0.65688	4	0.38615	0.5399	1	9844	2	0.6903	4	0.011755	0.038955	0.769004	964	3	1.3296
DENND5B	12	4	0.86475	0.86467	1	17121	1	0.60755	4	0.40939	0.56302	1	10255	2	0.1779	4	0.9127	0.91261	1	18207	0	-0.31761	4	0.011761	0.038975	0.769004	965	4	0.47737
LIG1	19	4	0.0017888	0.0064078	0.589154	218	3	2.1602	4	0.3041	0.46505	1	8409	2	0.82935	4	0.075752	0.17497	1	3161	2	0.95035	4	0.011775	0.039019	0.769004	966	3	1.238
NGFR	17	4	0.50052	0.6484	1	11471	2	0.76942	4	0.15845	0.3155	1	5407	2	1.077	4	0.3563	0.51192	1	9398	1	0.094931	4	0.011782	0.039044	0.769004	967	4	0.92621
APOE	19	4	0.0017562	0.0062882	0.585556	216	3	1.8255	4	0.41224	0.56565	1	10297	2	0.94621	4	0.082893	0.18773	1	3351	2	0.97756	4	0.011788	0.039057	0.769004	968	3	1.4021
CEACAM6	4	4	0.16634	0.32802	1	5553	2	0.35458	4	0.0086429	0.02932	1	577	2	0.62534	4	0.016955	0.054836	1	1022	2	0.53523	4	0.011815	0.039143	0.769004	969	1	-0.97139
C1orf127	1	4	0.10448	0.22594	1	3962	3	0.86853	4	0.9426	0.94261	1	18789	0	-0.23927	4	0.90249	0.90229	1	17987	0	0.1249	4	0.011815	0.039144	0.769004	970	4	0.53686
MAEA	4	4	0.82568	0.83036	1	16349	1	0.46319	4	0.39088	0.54555	1	9980	2	0.70868	4	0.63694	0.71604	1	13402	1	0.06558	4	0.011828	0.039188	0.769004	971	4	0.68752
CABP5	19	4	0.0042209	0.014769	0.792794	372	2	1.3388	4	0.059934	0.14648	1	2587	2	0.91426	4	0.044535	0.11677	1	2130	2	1.0971	4	0.011867	0.039318	0.769004	972	3	1.0128
OR8K5	11	4	0.21672	0.38319	1	6605	1	0.28591	4	0.12642	0.26323	1	4506	3	1.1521	4	0.37847	0.53263	1	9725	1	-0.19624	4	0.01188	0.039355	0.769004	973	4	0.75737
MSANTD3-TMEFF1	9	4	0.14879	0.29994	1	5093	2	0.74399	4	0.015316	0.049882	1	923	2	0.71815	4	0.0014002	0.0050438	0.62466	161	3	2.0525	4	0.011882	0.039358	0.769004	974	2	0.43872
PRAMEF2	1	4	0.13757	0.28172	1	4821	2	1.0779	4	0.11913	0.2511	1	4312	3	1.1349	4	0.25415	0.41629	1	7405	2	0.50573	4	0.011887	0.039376	0.769004	975	3	1.37
EBPL	13	4	0.07568	0.17519	1	3105	2	-2.8007	4	0.51641	0.66346	1	11999	1	-1.8595	4	0.060439	0.14673	1	2689	3	0.88434	4	0.011912	0.039459	0.769004	976	2	-1.2911
TLX3	5	4	0.49755	0.64559	1	11416	1	-0.36725	4	0.12749	0.26501	1	4536	2	0.87668	4	0.16426	0.32468	1	5622	3	0.67017	4	0.011918	0.039483	0.769004	977	4	0.57765
ABHD10	3	4	0.00022463	0.00081639	0.273576	59	3	2.4007	4	0.81431	0.8218	1	16322	0	-1.9294	4	0.022774	0.071857	1	1301	2	1.1367	4	0.011929	0.039511	0.769004	978	2	-0.029594
LPIN2	18	4	0.37161	0.52708	1	9450	1	0.56287	4	0.6771	0.73858	1	14086	1	0.31818	4	0.016343	0.053011	1	994	4	1.528	4	0.011963	0.039617	0.769004	979	3	1.1719
SCEL	13	4	0.0043822	0.015295	0.80309	381	3	1.7215	4	0.060128	0.14682	1	2592	3	1.044	4	0.73488	0.76737	1	14844	1	-0.92667	4	0.011966	0.039621	0.769004	980	3	1.0478
CLPTM1	19	4	0.047328	0.12253	1	2179	2	0.92661	4	0.23469	0.40082	1	7028	2	0.9388	4	0.79117	0.80358	1	15814	1	0.39679	4	0.011966	0.039623	0.769004	981	3	0.9912
C4A	14	4	0.0072597	0.024823	0.867933	567	3	1.6639	4	0.085913	0.19354	1	3382	3	1.2309	4	0.037035	0.10217	1	1866	3	1.5781	4	0.011969	0.03963	0.769004	982	2	1.0286
WFDC10B	20	4	0.473	0.62255	1	11006	2	0.62496	4	0.78923	0.8037	1	15860	1	0.15475	4	0.92467	0.92458	1	18462	0	-0.081425	4	0.01197	0.039633	0.769004	983	4	0.56391
RAP1GAP2	17	4	0.54061	0.67771	1	12038	1	0.53999	4	0.37079	0.52684	1	9678	2	0.63319	4	0.051648	0.13018	1	2396	3	1.3177	4	0.011976	0.039653	0.769004	984	4	0.66669
KDM1B	6	4	0.022517	0.071103	1	1282	3	1.483	4	0.15926	0.31678	1	5427	3	0.98475	4	0.31824	0.47631	1	8646	2	0.40839	4	0.011991	0.039694	0.769004	985	3	1.0341
CYB5D2	17	4	0.023525	0.074039	1	1338	2	1.0468	4	0.097639	0.21424	1	3720	2	0.84575	4	0.27077	0.43183	1	7732	1	-0.69585	4	0.012	0.039723	0.769004	986	3	1.1349
CYB5R3	22	4	0.091907	0.20394	1	3617	2	0.54608	4	0.025682	0.080135	1	1401	2	1.4231	4	0.60538	0.7017	1	12961	1	0.36996	4	0.012015	0.039768	0.769131	987	3	1.239
DHX34	19	4	0.091935	0.20399	1	3619	2	0.7982	4	0.049373	0.12659	1	2227	2	1.4613	4	0.0094685	0.03193	1	625	2	-0.73339	4	0.012132	0.040108	0.773554	988	3	0.59485
PPARD	6	4	0.18817	0.35673	1	6050	2	0.81858	4	0.71872	0.76042	1	14690	1	0.44717	4	0.87255	0.87224	1	17367	0	0.50153	4	0.012133	0.040112	0.773554	989	4	0.83573
HSFX2	X	4	0.62066	0.71079	1	13084	1	-1.7461	4	0.057033	0.14105	1	2476	2	1.1616	4	0.08764	0.19615	1	3473	2	0.80429	4	0.012212	0.040334	0.775824	990	2	-0.50215
TYMSOS	18	4	0.3557	0.51228	1	9214	1	0.70846	4	0.29024	0.45213	1	8120	2	0.52014	4	0.2973	0.45658	1	8245	2	0.73354	4	0.012222	0.040358	0.775824	991	3	1.1465
RCBTB2	13	4	0.29531	0.45596	1	8072	2	0.8911	4	0.50323	0.65104	1	11788	2	0.71928	4	0.91616	0.91605	1	18289	0	-0.012263	4	0.012253	0.040451	0.775824	992	4	0.90313
TRIO	5	4	0.82395	0.82898	1	16317	1	-0.098523	4	0.041599	0.1119	1	1963	3	1.5532	4	0.9218	0.92168	1	18400	0	0.40453	4	0.012261	0.040477	0.775824	993	4	0.67733
LRRC70	5	4	0.4603	0.6105	1	10808	2	0.68062	4	0.14602	0.29551	1	5062	1	0.64432	4	0.6208	0.70861	1	13179	1	-0.34852	4	0.01227	0.040506	0.775824	994	4	0.44664
VPS13B	8	4	0.30445	0.4646	1	8254	2	0.76651	4	0.153	0.30672	1	5257	2	1.0221	4	0.59762	0.69835	1	12866	1	0.51806	4	0.012284	0.040538	0.775824	995	3	1.1779
ISG20L2	1	4	0.11308	0.24074	1	4169	2	-1.8322	4	0.18631	0.35622	1	6091	2	1.1122	4	0.15304	0.30665	1	5314	2	0.76923	4	0.012305	0.040604	0.776338	996	2	-0.47906
POLD4	11	4	0.13799	0.28245	1	4833	1	0.057119	4	0.46028	0.61071	1	11080	1	0.24141	4	0.36821	0.52307	1	9567	2	0.68339	4	0.012349	0.040757	0.778516	997	4	0.66933
TAL1	1	4	0.76063	0.78436	1	15158	1	0.60886	4	0.5286	0.67478	1	12203	1	-0.22001	4	0.0048562	0.016912	0.891802	375	3	1.807	4	0.012399	0.040909	0.780689	998	4	1.0334
DCST1	1	4	0.52873	0.67327	1	11907	1	-0.3859	4	0.01966	0.062813	1	1126	3	1.8615	4	0.77293	0.79108	1	15478	1	0.35325	4	0.012419	0.040968	0.781071	999	4	0.70939
MED12	X	4	0.33035	0.48888	1	8744	2	-0.039739	4	0.052121	0.13181	1	2318	2	0.45918	4	0.0074316	0.025373	0.977997	515	2	1.4148	4	0.012449	0.041073	0.782333	1000	2	0.69121
KCNMA1	10	4	0.79657	0.80832	1	15804	0	0.4376	4	0.025648	0.080045	1	1398	3	1.5548	4	0.15598	0.31139	1	5407	2	0.56757	4	0.01249	0.041193	0.783869	1001	3	1.1915
ZNF865	19	4	0.032047	0.092871	1	1653	3	1.3947	4	0.016969	0.054872	1	1007	4	1.7507	4	0.088985	0.19851	1	3507	2	0.71773	4	0.012587	0.041491	0.786373	1002	4	1.2872
MB21D2	3	4	0.04577	0.1196	1	2115	2	0.45338	4	0.005266	0.018269	0.947063	383	1	-0.70423	4	0.098805	0.21584	1	3782	2	-0.065265	4	0.012607	0.041563	0.786373	1003	2	-0.60578
SPIRE1	18	4	0.44714	0.59805	1	10596	1	-0.082823	4	0.055329	0.13788	1	2426	2	0.71948	4	0.43366	0.58496	1	10590	2	0.70637	4	0.012648	0.041694	0.786373	1004	3	0.88507
ZNF181	19	4	0.023223	0.073154	1	1317	4	1.4791	4	0.49626	0.64448	1	11657	1	0.47493	4	0.27769	0.43834	1	7863	2	0.32926	4	0.01265	0.041697	0.786373	1005	4	1.0449
PDLIM2	8	4	0.88685	0.88649	1	17589	0	0.34086	4	0.32825	0.48761	1	8940	2	0.93136	4	0.5192	0.666	1	11973	2	0.61765	4	0.012651	0.041701	0.786373	1006	3	0.91503
ZNF540	19	4	0.014154	0.046305	1	914	2	1.1323	4	0.014467	0.047286	1	880	2	0.32576	4	0.094104	0.20756	1	3644	1	-0.26949	4	0.01266	0.041727	0.786373	1007	2	-0.30189
CNKSR2	X	4	0.0083769	0.028453	0.907662	625	1	-1.6144	4	0.00073039	0.0026505	0.524895	98	3	2.3475	4	0.020924	0.066503	1	1208	4	1.429	4	0.012669	0.041754	0.786373	1008	3	1.6566
ENAM	4	4	0.66058	0.72943	1	13627	1	0.15775	4	0.12943	0.26823	1	4599	3	1.1313	4	0.033445	0.09514	1	1724	3	1.4909	4	0.01269	0.041814	0.786758	1009	3	1.3754
TRIM46	1	4	0.96458	0.96466	1	19202	0	0.042195	4	0.45145	0.60236	1	10924	2	0.53899	4	0.12745	0.26468	1	4566	3	1.2161	4	0.012727	0.041926	0.787979	1010	4	0.61627
GMPPB	3	4	0.12411	0.25932	1	4461	2	0.94468	4	0.87954	0.87919	1	17542	0	-0.92689	4	0.010741	0.035898	1	708	3	1.4747	4	0.012737	0.041957	0.787979	1011	3	1.0013
VPS52	6	4	0.95104	0.95108	1	18916	0	0.10408	4	0.14901	0.30037	1	5149	2	0.92145	4	0.29186	0.45149	1	8134	2	0.64162	4	0.012778	0.042087	0.788977	1012	4	0.90006
DYNAP	18	4	0.60043	0.70194	1	12801	1	0.79989	4	0.50077	0.64873	1	11735	2	0.42539	4	0.28705	0.44698	1	8050	2	0.72166	4	0.012788	0.042112	0.788977	1013	4	0.86733
TMEM134	11	4	0.41997	0.57258	1	10188	2	0.63603	4	0.10658	0.22975	1	3964	3	1.2423	4	0.23857	0.4018	1	7097	2	0.36448	4	0.012793	0.042128	0.788977	1014	4	1.0774
HSFY1	Y	4	0.31796	0.47724	1	8501	2	0.90281	4	0.041661	0.11201	1	1965	3	1.1202	4	0.34218	0.49879	1	9144	1	0.10434	4	0.012823	0.042215	0.789873	1015	3	1.1606
KRTAP4-2	17	4	0.78191	0.79816	1	15541	1	0.41556	4	0.056281	0.13964	1	2453	3	1.3154	4	0.47101	0.62038	1	11190	2	0.35325	4	0.012859	0.042329	0.791274	1016	4	0.87534
CHCHD5	2	4	0.14712	0.29724	1	5046	2	0.86364	4	0.0034011	0.011955	0.864527	272	2	0.97787	4	0.21428	0.37919	1	6662	2	0.7866	4	0.012909	0.04248	0.792626	1017	3	1.1957
GTPBP3	19	4	0.097955	0.21462	1	3774	2	1.1032	4	0.39086	0.54552	1	9979	2	0.65628	4	0.29892	0.45815	1	8276	2	0.58972	4	0.012932	0.042558	0.793332	1018	3	1.063
RFPL4A	19	4	0.17796	0.3463	1	5837	2	0.58051	4	0.041357	0.11141	1	1952	3	1.6375	4	0.033781	0.095788	1	1741	3	1.3875	4	0.012963	0.042655	0.794412	1019	4	1.1624
ORC3	6	4	0.31835	0.47759	1	8505	2	0.6568	4	0.00073308	0.0026603	0.524895	100	3	2.31	4	0.069675	0.16398	1	2972	2	-1.1427	4	0.012988	0.042732	0.794554	1020	2	-0.77592
CCDC43	17	4	0.69357	0.74601	1	14083	1	0.67037	4	0.12905	0.26756	1	4587	2	0.61342	4	0.17024	0.33421	1	5758	2	0.70741	4	0.012992	0.042742	0.794554	1021	3	1.1764
PRAF2	X	4	0.88759	0.88724	1	17599	0	0.0087425	4	0.019231	0.061555	1	1100	3	1.7174	4	0.61538	0.70616	1	13111	1	0.57156	4	0.013032	0.042866	0.794895	1022	4	1.1526
SRSF3	6	4	0.047648	0.12311	1	2188	3	1.374	4	0.21477	0.3825	1	6658	2	0.66594	4	0.78216	0.7973	1	15637	0	-2.6722	4	0.013044	0.042903	0.794895	1023	2	-0.5668
PRODH2	19	4	0.050126	0.12776	1	2283	3	1.1854	4	0.35026	0.50789	1	9401	1	0.14941	4	0.19469	0.36095	1	6285	2	0.64341	4	0.013047	0.04291	0.794895	1024	4	0.86675
PSMA4	15	4	0.10213	0.22192	1	3889	3	1.2913	4	0.051214	0.1301	1	2288	2	1.0086	4	0.0096519	0.032497	1	638	3	1.5923	4	0.013058	0.042942	0.794895	1025	3	1.3666
ASB9	X	4	0.051502	0.13039	1	2337	2	0.83822	4	0.041078	0.11087	1	1940	2	1.148	4	0.0081553	0.027708	0.993448	553	3	2.0272	4	0.013072	0.042986	0.794895	1026	2	0.32906
ZNF660	3	4	0.28783	0.44905	1	7945	2	0.96576	4	0.46698	0.61708	1	11182	1	0.015126	4	0.0098165	0.033014	1	649	3	1.1582	4	0.013086	0.043026	0.794895	1027	3	1.2459
ZSWIM5	1	4	0.79012	0.80379	1	15686	1	0.036886	4	0.045476	0.11932	1	2088	3	1.3401	4	0.91399	0.91388	1	18241	0	0.23906	4	0.013136	0.043186	0.794895	1028	4	0.81588
GLTSCR2	12	4	0.0070559	0.024166	0.867933	554	4	1.9265	4	0.20123	0.37002	1	6409	1	-0.64282	4	0.0014727	0.0053066	0.62466	169	4	2.1737	4	0.01314	0.043203	0.794895	1029	4	1.4498
ACAD8	11	4	0.78529	0.80043	1	15601	1	0.31149	4	0.94761	0.94762	1	18903	0	0.079473	4	0.36459	0.51969	1	9513	1	0.1459	4	0.013146	0.043221	0.794895	1030	4	0.35638
ZNRF2	7	4	0.104	0.2251	1	3945	2	0.99049	4	0.064352	0.15475	1	2742	3	1.7342	4	0.076853	0.17693	1	3194	3	1.3583	4	0.013148	0.043225	0.794895	1031	4	1.3854
DUOX2	15	4	0.7567	0.78197	1	15093	1	0.45884	4	0.92346	0.92339	1	18410	0	-0.47192	4	0.88132	0.88101	1	17552	0	0.22074	4	0.013177	0.043321	0.794895	1032	4	0.36084
BUB3	12	4	0.017894	0.057623	1	1073	3	1.4805	4	0.0037953	0.013316	0.883265	297	3	2.1101	4	0.061943	0.14958	1	2726	2	0.79825	4	0.013184	0.043341	0.794895	1033	3	1.3165
SIPA1L3	19	4	0.0013603	0.0049104	0.561376	174	4	1.8684	4	0.33445	0.49327	1	9047	1	-0.97151	4	0.019246	0.06161	1	1124	3	1.7818	4	0.013188	0.043355	0.794895	1034	3	1.2876
MED11	17	4	0.056013	0.13888	1	2482	2	1.0492	4	0.0064568	0.022213	0.964983	460	3	1.7808	4	0.0011868	0.0042852	0.606993	142	3	1.8822	4	0.013198	0.043378	0.794895	1035	2	0.39896
HBZ	16	4	0.91848	0.91835	1	18258	0	-0.48186	4	0.15183	0.30487	1	5230	3	0.99772	4	0.91412	0.91402	1	18246	0	0.33764	4	0.013211	0.043419	0.794895	1036	4	0.40536
CPSF6	12	4	0.12548	0.26157	1	4499	1	0.28908	4	0.14079	0.28708	1	4917	2	0.95437	4	0.023142	0.072906	1	1318	4	1.1902	4	0.013212	0.043424	0.794895	1037	3	1.3105
WDR83OS	19	4	0.32577	0.48458	1	8659	2	0.90327	4	0.24176	0.40731	1	7166	2	1.0155	4	0.15739	0.31369	1	5444	1	0.15422	4	0.01324	0.043507	0.794916	1038	4	0.89959
DHRS7C	17	4	0.061794	0.14971	1	2665	2	0.62797	4	0.26571	0.4295	1	7618	2	0.16052	4	0.00099597	0.0035907	0.596882	121	3	1.9238	4	0.013241	0.043512	0.794916	1039	2	-0.71807
YBX1	1	4	0.13403	0.27578	1	4714	1	-1.2996	4	0.053482	0.13443	1	2365	2	-0.53465	4	0.45219	0.60242	1	10885	1	0.41155	4	0.013293	0.043678	0.796199	1040	2	-0.321
SLC13A3	20	4	0.0014421	0.0052042	0.561376	185	4	1.6297	4	0.52259	0.66926	1	12100	2	0.49545	4	0.15448	0.30895	1	5362	2	0.81716	4	0.013295	0.04368	0.796199	1041	3	1.3564
UBASH3A	21	4	0.018559	0.05954	1	1101	3	0.94301	4	0.33394	0.4928	1	9036	1	0.061391	4	0.20479	0.37033	1	6482	2	0.86645	4	0.013321	0.043759	0.796199	1042	3	1.0517
SHARPIN	8	4	0.034565	0.097871	1	1739	1	0.36355	4	0.018428	0.059181	1	1069	4	1.1932	4	0.39149	0.54492	1	9927	2	0.67742	4	0.01334	0.04382	0.796199	1043	3	1.0412
COG6	13	4	0.85184	0.85261	1	16858	1	0.011304	4	0.6327	0.71748	1	13463	1	0.80615	4	0.72045	0.75899	1	14602	1	0.042306	4	0.013363	0.043886	0.796199	1044	4	0.55919
CCL16	17	4	0.64881	0.72383	1	13448	1	0.53998	4	0.13865	0.28358	1	4854	2	0.19268	4	0.43795	0.58895	1	10663	2	0.50013	4	0.013369	0.043903	0.796199	1045	4	0.87805
NECAP1	12	4	0.013415	0.044049	0.998032	880	3	1.2873	4	0.1628	0.32251	1	5531	2	0.99481	4	0.70076	0.74812	1	14287	1	-0.12052	4	0.013373	0.043916	0.796199	1046	3	0.93477
NCCRP1	19	4	0.011875	0.039343	0.960366	817	3	1.9371	4	0.0051611	0.017925	0.944028	376	3	2.1215	4	0.071589	0.16741	1	3043	2	1.0421	4	0.013403	0.044021	0.796199	1047	3	1.6353
PCYT2	17	4	0.50576	0.65335	1	11551	2	0.25688	4	0.45252	0.60339	1	10939	2	0.54736	4	0.39656	0.54974	1	9998	1	-0.2106	4	0.013409	0.044031	0.796199	1048	3	0.80492
KIN	10	4	0.0033035	0.011636	0.733713	318	3	1.7209	4	0.089834	0.20045	1	3509	2	-0.97892	4	0.23146	0.39513	1	6966	2	0.67899	4	0.013423	0.044078	0.796199	1049	2	0.76992
HOXD1	2	4	0.037336	0.10328	1	1826	2	0.39556	4	0.0048093	0.016755	0.928416	358	3	2.3381	4	0.057591	0.14143	1	2602	3	0.82037	4	0.01343	0.044097	0.796199	1050	2	1.0668
SCML1	X	4	0.8333	0.83661	1	16497	1	0.15207	4	0.45906	0.60953	1	11063	2	0.51649	4	0.82608	0.83012	1	16462	1	-0.007553	4	0.013504	0.044314	0.797731	1051	4	0.43356
C22orf42	22	4	0.49345	0.64174	1	11343	1	0.62299	4	0.40234	0.5564	1	10143	2	0.80753	4	0.3448	0.50124	1	9197	1	0.0046823	4	0.013506	0.044323	0.797731	1052	4	0.74827
FGF11	17	4	0.13875	0.28368	1	4862	2	0.89563	4	0.10878	0.23355	1	4034	3	0.94254	4	0.44719	0.59767	1	10802	1	0.014335	4	0.013528	0.044397	0.797731	1053	3	1.0814
CDIPT	16	4	0.03714	0.10288	1	1819	1	0.27273	4	0.12565	0.26194	1	4481	2	0.94577	4	0.070062	0.16468	1	2990	3	1.1323	4	0.013551	0.044471	0.797731	1054	3	1.3788
FBXO39	17	4	0.94606	0.94606	1	18811	0	0.28032	4	0.37317	0.52908	1	9704	1	0.48281	4	0.015121	0.049252	1	935	3	1.5378	4	0.013555	0.044477	0.797731	1055	4	0.83094
CTBS	1	4	0.027712	0.084294	1	1492	3	1.7503	4	0.04662	0.1215	1	2132	3	1.3035	4	0.0095419	0.032161	1	629	3	0.92066	4	0.013565	0.044505	0.797731	1056	2	0.038961
SLC51B	15	4	0.22474	0.39057	1	6750	2	0.97233	4	0.48451	0.63352	1	11460	2	0.44122	4	0.21445	0.37936	1	6664	2	0.19559	4	0.01361	0.044636	0.797731	1057	4	0.57368
TMPRSS5	11	4	0.39421	0.54822	1	9782	2	0.57994	4	0.2436	0.40897	1	7205	2	0.99185	4	0.0079256	0.026997	0.990945	540	3	1.9264	4	0.013615	0.04465	0.797731	1058	3	1.109
FAM98C	19	4	0.024544	0.076933	1	1373	2	1.0346	4	0.00054188	0.0019702	0.50806	78	4	2.78	4	0.6457	0.72027	1	13517	1	0.73439	4	0.013617	0.044657	0.797731	1059	3	1.6016
SNAI2	8	4	0.40562	0.55905	1	9959	2	0.24381	4	0.35412	0.51141	1	9461	2	0.8566	4	0.32846	0.48605	1	8838	2	0.49888	4	0.013627	0.04469	0.797731	1060	3	0.99784
TLL1	4	4	0.32365	0.48255	1	8613	2	0.30495	4	0.019875	0.063432	1	1142	4	0.98806	4	0.41317	0.56553	1	10271	2	0.40988	4	0.013644	0.044742	0.797731	1061	3	0.89133
MMP20	11	4	0.89494	0.8947	1	17759	0	0.46281	4	0.98592	0.98599	1	19705	0	-0.51439	4	0.10431	0.2254	1	3931	3	1.0225	4	0.013646	0.044751	0.797731	1062	4	0.59372
C9orf170	9	4	0.029183	0.087238	1	1537	2	1.1412	4	0.85585	0.85635	1	17081	1	-0.18422	4	0.17972	0.34699	1	5976	2	0.10447	4	0.013665	0.044808	0.797731	1063	2	0.59217
CENPV	17	4	0.081955	0.18643	1	3300	2	0.61984	4	0.39192	0.5465	1	9996	2	-0.00042283	4	0.014442	0.047194	1	904	2	1.2351	4	0.013679	0.044853	0.797731	1064	2	0.97272
ZNF814	19	4	0.032212	0.0932	1	1661	2	0.8706	4	0.1663	0.328	1	5621	2	0.81117	4	0.45823	0.60817	1	10978	1	0.29334	4	0.013684	0.044867	0.797731	1065	3	1.0307
RRP1B	21	4	0.78841	0.80261	1	15655	1	0.25422	4	0.27496	0.43808	1	7803	1	0.30944	4	0.18571	0.35253	1	6115	2	0.77668	4	0.013689	0.044885	0.797731	1066	4	0.76688
TSPAN10	17	4	0.47495	0.62441	1	11040	1	-0.11623	4	0.91316	0.91306	1	18203	0	0.038264	4	0.075231	0.17399	1	3147	2	0.71837	4	0.013706	0.044944	0.797731	1067	4	0.4817
EIF5A	17	4	0.026074	0.080942	1	1436	2	0.97379	4	0.0050355	0.017505	0.944028	367	3	2.381	4	0.055085	0.13674	1	2531	1	-1.0858	4	0.013716	0.044975	0.797731	1068	1	-0.69629
TBCD	17	4	0.20657	0.37382	1	6405	1	-0.32117	4	0.50112	0.64905	1	11742	2	0.73046	4	0.33877	0.49556	1	9062	2	0.48094	4	0.013738	0.045043	0.797731	1069	4	0.46244
PIGO	9	4	0.47638	0.62578	1	11062	2	0.5267	4	0.21847	0.38587	1	6730	2	0.33713	4	0.38097	0.53505	1	9765	1	-0.9989	4	0.013743	0.045054	0.797731	1070	2	0.22569
RLF	1	4	0.47928	0.6285	1	11108	2	0.74795	4	0.33964	0.49805	1	9180	1	0.54097	4	0.11058	0.23629	1	4093	3	0.97126	4	0.013785	0.045189	0.798653	1071	4	0.89297
CRNKL1	20	4	0.2869	0.44819	1	7917	2	0.8537	4	0.061384	0.14919	1	2633	2	0.96967	4	0.020965	0.06662	1	1210	4	1.4862	4	0.013794	0.04522	0.798653	1072	3	1.4845
CR1	1	4	0.63367	0.71669	1	13253	1	-0.52563	4	0.064146	0.15436	1	2733	3	1.332	4	0.22773	0.39163	1	6905	2	0.6282	4	0.013807	0.045266	0.798653	1073	3	0.97046
LILRB1	19	4	0.042533	0.11342	1	2018	2	0.95938	4	0.0041347	0.014471	0.888237	322	3	2.0333	4	0.73201	0.7657	1	14790	1	0.18075	4	0.013824	0.045309	0.798653	1074	3	1.3884
TMEM256	17	4	0.10537	0.22754	1	3986	3	1.1647	4	0.043049	0.1147	1	2012	1	0.15817	4	0.15359	0.30754	1	5331	3	0.8527	4	0.013847	0.045382	0.798653	1075	4	0.71813
TCF20	22	4	0.14839	0.29929	1	5086	2	0.7814	4	0.13441	0.27654	1	4721	3	1.1745	4	0.45647	0.6065	1	10949	1	0.19341	4	0.013878	0.045472	0.798653	1076	3	1.1444
DNAH1	3	4	0.52048	0.66725	1	11781	2	0.49428	4	0.51997	0.66679	1	12047	2	0.27527	4	0.41986	0.5719	1	10374	2	0.49186	4	0.013904	0.04554	0.798653	1077	4	0.75482
RHPN2	19	4	0.49606	0.6442	1	11387	2	0.64733	4	0.52591	0.67246	1	12165	2	0.6976	4	0.43213	0.58352	1	10563	1	0.47002	4	0.013908	0.045556	0.798653	1078	3	0.93557
KCNJ18	17	4	0.40889	0.56212	1	10005	1	0.42631	4	0.73907	0.77205	1	15024	1	0.47349	4	0.10928	0.23405	1	4060	3	1.0133	4	0.013922	0.0456	0.798653	1079	3	0.98521
KLF1	19	4	0.72805	0.7649	1	14600	1	0.37108	4	0.26765	0.43122	1	7659	1	-0.12644	4	0.15259	0.30594	1	5295	1	0.24634	4	0.013934	0.045636	0.798653	1080	4	0.38124
IQCA1	2	4	0.48846	0.63707	1	11253	2	0.80269	4	0.083562	0.18941	1	3313	2	1.4026	4	0.74336	0.77251	1	14982	1	-0.0062592	4	0.013938	0.045646	0.798653	1081	3	1.2654
ABLIM3	5	4	0.065439	0.15655	1	2786	3	1.2551	4	0.7677	0.78943	1	15493	1	0.088692	4	0.93696	0.93699	1	18700	0	0.16109	4	0.013955	0.045697	0.798653	1082	4	0.66116
RUSC1-AS1	1	4	0.1267	0.2636	1	4539	2	0.57747	4	0.88422	0.88391	1	17641	0	0.14323	4	0.54922	0.67833	1	12342	1	0.48582	4	0.013966	0.045728	0.798653	1083	4	0.83844
NUAK1	12	4	0.2644	0.42739	1	7494	1	-0.10118	4	0.35475	0.51201	1	9468	2	0.81764	4	0.1586	0.31564	1	5482	3	0.69193	4	0.013969	0.045739	0.798653	1084	3	0.89936
PDE4B	1	4	0.22225	0.38828	1	6700	2	0.48464	4	0.30107	0.46222	1	8357	2	0.9063	4	0.12283	0.25697	1	4441	3	0.92773	4	0.013972	0.045749	0.798653	1085	3	0.88692
PHLPP1	18	4	0.66917	0.7336	1	13745	1	0.33052	4	0.53412	0.67683	1	12265	1	-0.19434	4	0.15381	0.30788	1	5339	3	0.72552	4	0.013977	0.045767	0.798653	1086	4	0.6029
CERKL	2	4	0.0012583	0.004552	0.555566	164	3	1.909	4	0.56675	0.68936	1	12647	1	0.46752	4	0.17187	0.33674	1	5803	2	0.65282	4	0.01398	0.045781	0.798653	1087	3	1.0384
ITGB8	7	4	0.5547	0.68316	1	12207	1	0.31303	4	0.062848	0.15191	1	2687	3	1.4781	4	0.036535	0.1012	1	1852	3	1.0531	4	0.013996	0.045825	0.798716	1088	3	1.1543
LIMS3L	17	4	0.1338	0.27541	1	4709	3	0.73118	4	0.44372	0.59509	1	10801	2	0.64686	4	0.11375	0.24166	1	4179	3	0.95505	4	0.01403	0.045927	0.799799	1089	3	1.0575
PDCD2L	19	4	0.10685	0.23007	1	4019	3	1.2023	4	0.17229	0.33741	1	5760	2	0.15802	4	0.28838	0.44823	1	8074	2	0.039659	4	0.014045	0.045979	0.800023	1090	2	0.79683
CPQ	8	4	0.10781	0.23177	1	4047	3	1.1214	4	0.05356	0.13458	1	2369	3	1.2985	4	0.71765	0.75742	1	14563	1	0.016401	4	0.014101	0.046144	0.80207	1091	3	1.0185
OXT	20	4	0.5695	0.689	1	12383	1	-0.10982	4	0.7997	0.81111	1	16052	1	-0.10391	4	0.24786	0.41036	1	7274	1	0.23487	4	0.01411	0.046177	0.80207	1092	4	0.31634
ATP1B2	7	4	0.72546	0.76341	1	14566	1	0.26999	4	0.15772	0.31432	1	5386	2	-0.89612	4	0.12056	0.25315	1	4365	2	0.83937	4	0.014212	0.046491	0.805725	1093	2	0.10337
KCNK10	14	4	0.8806	0.88028	1	17473	0	-0.68239	4	0.010191	0.034158	1	658	3	1.8065	4	0.080651	0.18379	1	3301	1	-0.14869	4	0.014213	0.046496	0.805725	1094	3	1.0474
P2RX7	12	4	0.82826	0.83244	1	16397	1	0.60821	4	0.49091	0.6395	1	11577	1	0.057244	4	0.029192	0.086709	1	1562	3	1.3172	4	0.014227	0.046534	0.805725	1095	3	1.0359
RXRA	9	4	0.061748	0.14963	1	2662	3	1.3843	4	0.059752	0.14614	1	2580	1	-0.022304	4	0.54884	0.67818	1	12332	1	0.45562	4	0.014291	0.046742	0.80702	1096	3	1.0053
ZNF583	19	4	0.98374	0.98381	1	19626	0	-0.25606	4	0.055234	0.13771	1	2421	3	1.3366	4	0.7362	0.76819	1	14867	1	0.29422	4	0.014329	0.046856	0.80702	1098	3	0.83774
METTL7A	12	4	0.15049	0.30268	1	5144	2	0.55641	4	0.28007	0.44282	1	7900	1	0.25967	4	0.84946	0.85019	1	16901	1	0.14878	4	0.014332	0.046863	0.80702	1099	4	0.57197
HEXDC	17	4	0.16699	0.32904	1	5564	3	0.9421	4	0.80814	0.81719	1	16208	1	-0.31376	4	0.95717	0.95726	1	19137	0	-0.31482	4	0.014383	0.047011	0.808887	1100	4	0.23565
SYTL1	1	4	0.21983	0.3861	1	6656	1	-0.57197	4	0.51553	0.66263	1	11981	2	0.67629	4	0.23248	0.39607	1	6994	2	0.61861	4	0.014416	0.047117	0.810007	1101	4	0.56767
IFNL2	19	4	0.16404	0.32438	1	5496	2	0.99262	4	0.24457	0.40987	1	7223	1	-0.65757	4	0.080405	0.18334	1	3296	2	0.60385	4	0.014453	0.047236	0.810088	1102	2	0.81667
PVR	19	4	0.030093	0.089014	1	1576	1	-0.54631	4	0.023661	0.074458	1	1318	3	1.5329	4	0.32904	0.48659	1	8849	2	0.64631	4	0.014455	0.047242	0.810088	1103	2	0.59246
ACKR2	3	4	0.72153	0.76114	1	14493	1	0.24434	4	0.11728	0.248	1	4258	3	1.1242	4	0.0052585	0.018241	0.905916	399	4	1.3356	4	0.014484	0.047344	0.811143	1104	3	1.0821
ANKS6	9	4	0.1692	0.33255	1	5611	3	0.96796	4	0.36578	0.52225	1	9611	1	0.07474	4	0.22742	0.39136	1	6900	2	0.77199	4	0.014518	0.047444	0.812163	1105	3	1.0473
ARSF	X	4	0.59005	0.69748	1	12654	1	-1.1987	4	0.11412	0.24261	1	4173	3	1.24	4	0.82784	0.83159	1	16506	1	0.57819	4	0.014538	0.047506	0.812534	1106	4	0.38079
PTPRB	12	4	0.53727	0.67647	1	12004	1	-0.1128	4	0.14862	0.29973	1	5141	2	0.85082	4	0.29506	0.45443	1	8197	2	0.73447	4	0.014556	0.047561	0.812692	1107	2	0.6225
CHIT1	1	4	0.77222	0.79173	1	15366	1	0.14501	4	0.27975	0.44252	1	7894	2	0.60478	4	0.78154	0.79688	1	15629	1	0.3493	4	0.014567	0.047596	0.812692	1108	4	0.35216
FASTKD5	20	4	0.46813	0.61797	1	10925	2	0.45065	4	0.26682	0.43048	1	7638	2	0.8531	4	0.95223	0.95228	1	19016	0	-0.63938	4	0.014612	0.047716	0.814044	1110	4	0.40708
HCAR1	12	4	0.13517	0.27771	1	4751	3	1.0147	4	0.52118	0.66793	1	12073	2	0.74082	4	0.0092623	0.031276	1	613	3	1.4851	4	0.014633	0.047782	0.814478	1111	3	0.96026
HYI	1	4	0.0042362	0.014822	0.792794	373	4	1.5098	4	0.25293	0.41764	1	7363	2	0.15251	4	0.32757	0.48518	1	8823	1	-0.030334	4	0.014688	0.047953	0.816698	1112	3	0.9047
LRRC29	16	4	0.70018	0.74953	1	14176	1	0.20551	4	0.27203	0.43536	1	7746	2	0.82031	4	0.9048	0.9046	1	18033	0	-0.40264	4	0.014785	0.048227	0.81874	1114	4	0.44251
APOC3	11	4	0.26684	0.42962	1	7537	2	0.25192	4	0.23087	0.39725	1	6962	2	0.6149	4	0.61822	0.70744	1	13150	1	0.3847	4	0.01479	0.048238	0.81874	1115	3	0.88575
OR52N5	11	4	0.44259	0.59381	1	10537	1	0.57301	4	0.76812	0.78969	1	15499	1	0.53927	4	0.097556	0.21366	1	3751	3	0.93713	4	0.014797	0.048262	0.81874	1116	4	0.72736
TRIM26	6	4	0.78904	0.80305	1	15666	1	-0.063137	4	0.0062665	0.021579	0.962383	447	3	2.2001	4	0.4048	0.5576	1	10118	2	0.70294	4	0.014824	0.048344	0.81874	1117	4	0.49598
CLASRP	19	4	0.00195	0.0069729	0.612456	229	3	1.8776	4	0.087358	0.19613	1	3432	1	-2.5506	4	0.0054038	0.018722	0.916251	405	2	1.2455	4	0.014824	0.048346	0.81874	1118	2	-1.3077
RDX	11	4	0.4543	0.60485	1	10721	2	0.71482	4	0.76476	0.78756	1	15450	1	0.086141	4	0.020583	0.065536	1	1193	4	1.2445	4	0.014828	0.048357	0.81874	1119	3	1.0124
OLFM1	9	4	0.12156	0.25503	1	4394	2	0.91876	4	0.16357	0.3237	1	5550	3	1.1759	4	0.2924	0.45199	1	8143	2	0.92484	4	0.014829	0.048358	0.81874	1120	3	1.3477
SIGLEC14	19	4	0.048016	0.12379	1	2203	3	1.4252	4	0.1871	0.35694	1	6110	2	-0.048879	4	0.0051383	0.017855	0.896865	390	3	2.1544	4	0.014892	0.048561	0.820435	1121	4	1.3001
ACRC	X	4	0.21639	0.38292	1	6598	2	0.64579	4	0.16635	0.32806	1	5623	2	0.77255	4	0.13437	0.27621	1	4760	2	-0.27559	4	0.014911	0.048616	0.820435	1122	3	1.008
BTN2A2	6	4	0.47834	0.6276	1	11094	2	0.0068829	4	0.80729	0.81657	1	16183	1	0.46533	4	0.50676	0.65416	1	11769	2	0.5531	4	0.014944	0.04871	0.820435	1123	4	0.58367
SPAG4	20	4	0.019067	0.061068	1	1114	2	1.0939	4	0.12303	0.25761	1	4413	3	1.3684	4	0.054787	0.1362	1	2513	3	1.4966	4	0.014958	0.048751	0.820435	1124	3	1.5363
APITD1-CORT	17	4	0.39269	0.5468	1	9758	2	0.53621	4	0.72378	0.76328	1	14788	1	0.66622	4	0.45927	0.60913	1	10997	1	-0.25209	4	0.014958	0.048751	0.820435	1125	4	0.36744
MCAT	22	4	0.35468	0.51135	1	9199	2	0.45866	4	0.4947	0.64298	1	11630	2	0.70227	4	0.95589	0.95593	1	19103	0	-0.04534	4	0.014983	0.048831	0.820435	1126	4	0.72853
NTF4	19	4	0.024769	0.077581	1	1383	3	1.696	4	0.055351	0.13791	1	2428	3	1.19	4	0.048942	0.12505	1	2287	2	0.46512	4	0.014992	0.04886	0.820435	1127	3	1.2336
TGOLN2	2	4	0.14927	0.30073	1	5109	3	0.90556	4	0.10219	0.22218	1	3835	2	1.2039	4	0.021376	0.067806	1	1237	4	0.83109	4	0.014999	0.048874	0.820435	1128	4	1.1013
KCTD11	17	4	0.0047091	0.016415	0.810855	406	3	1.959	4	0.1783	0.34682	1	5903	2	1.0606	4	0.26867	0.42983	1	7686	1	0.012673	4	0.015021	0.048939	0.820435	1129	3	1.3102
FFAR1	19	4	0.025173	0.078734	1	1401	4	1.035	4	0.86005	0.8603	1	17154	1	0.42626	4	0.077764	0.17857	1	3215	3	1.0332	4	0.015036	0.048978	0.820435	1130	3	1.0361
CAPN13	2	4	0.05025	0.12801	1	2287	3	1.3833	4	0.14263	0.29006	1	4978	2	0.97808	4	0.81265	0.81947	1	16210	0	0.026336	4	0.015071	0.049104	0.820435	1131	3	1.2918
FAN1	15	4	0.26905	0.43165	1	7581	2	0.39095	4	0.27015	0.43356	1	7710	2	0.92381	4	0.19799	0.364	1	6352	2	0.74042	4	0.015075	0.049115	0.820435	1132	4	0.95908
SCP2	1	4	0.019825	0.063274	1	1149	2	1.2472	4	0.31002	0.47055	1	8519	2	0.99831	4	0.61648	0.70665	1	13127	1	-0.10081	4	0.015085	0.049147	0.820435	1133	3	1.0445
ABHD17B	9	4	0.27439	0.43671	1	7692	1	0.064575	4	0.085194	0.19227	1	3357	2	1.122	4	0.50623	0.6537	1	11763	1	0.32709	4	0.015117	0.049239	0.820435	1134	3	0.97332
PIGV	1	4	0.66067	0.72947	1	13629	1	0.046117	4	0.6865	0.74331	1	14207	1	0.65559	4	0.21043	0.37554	1	6594	2	0.81656	4	0.015123	0.049262	0.820435	1135	4	0.7822
CDIP1	16	4	0.40974	0.56295	1	10018	1	-2.1909	4	0.3467	0.50463	1	9316	1	-1.9333	4	0.77743	0.79405	1	15554	0	-2.8522	4	0.015129	0.049279	0.820435	1137	2	-1.8551
TP53	17	4	0.079956	0.18286	1	3238	3	1.1647	4	0.0070745	0.02423	0.981602	493	3	2.0529	4	0.092225	0.20422	1	3590	2	0.51634	4	0.015141	0.049314	0.820435	1138	3	1.207
HS3ST5	6	4	0.14344	0.29125	1	4954	3	0.9748	4	0.24474	0.41004	1	7225	2	0.90849	4	0.077254	0.17765	1	3204	3	1.03	4	0.015142	0.049314	0.820435	1139	3	1.2203
BCL3	19	4	0.91483	0.91473	1	18186	0	-0.62276	4	0.56053	0.68685	1	12579	1	0.24708	4	0.02094	0.066563	1	1209	4	1.0435	4	0.015174	0.049415	0.820748	1140	4	0.80752
GTF2IRD1	7	4	0.49496	0.64315	1	11370	2	0.49726	4	0.81955	0.82584	1	16399	1	0.19611	4	0.80576	0.81424	1	16069	1	0.55099	4	0.015201	0.049502	0.821232	1141	4	0.79993
MED31	17	4	0.094591	0.20868	1	3690	3	1.3194	4	0.085616	0.19299	1	3368	3	1.4789	4	0.038075	0.10423	1	1904	2	1.3427	4	0.015216	0.049549	0.821232	1143	3	1.3857
PRR19	19	4	0.038416	0.1054	1	1870	2	0.81801	4	0.11056	0.2366	1	4082	3	1.1149	4	0.0059481	0.020569	0.957373	426	3	1.9247	4	0.015224	0.049566	0.821232	1144	3	1.2114
ODF3	11	4	0.89706	0.89686	1	17801	0	0.20327	4	0.34666	0.50459	1	9315	1	0.20083	4	0.15542	0.31049	1	5389	3	0.72747	4	0.015261	0.049686	0.822536	1145	4	0.53588
MAN1C1	1	4	0.35011	0.50714	1	9112	1	0.43426	4	0.29535	0.45678	1	8230	1	0.68709	4	0.26082	0.42254	1	7532	1	-0.15946	4	0.01534	0.049952	0.826123	1147	4	0.8552
TBRG4	7	4	0.32945	0.48805	1	8726	1	0.61916	4	0.52256	0.66924	1	12098	2	0.71366	4	0.84114	0.8428	1	16752	1	-0.090383	4	0.01535	0.049985	0.826123	1149	4	0.61763
KRTAP10-8	21	4	0.51913	0.66598	1	11756	2	0.60566	4	0.93261	0.93254	1	18584	0	-0.22741	4	0.0033366	0.01175	0.826335	285	4	1.2319	4	0.01537	0.050051	0.826542	1150	3	0.83079
LARP4	12	4	0.20192	0.36955	1	6322	1	-0.25112	4	0.025227	0.078881	1	1379	3	1.7921	4	0.019755	0.063074	1	1147	3	1.5401	4	0.015435	0.050234	0.827753	1151	3	1.1972
TRNP1	1	4	0.25702	0.42056	1	7357	2	0.37731	4	0.035513	0.10002	1	1738	2	0.63516	4	0.15906	0.31638	1	5494	2	0.92157	4	0.015443	0.050264	0.827753	1152	4	0.75069
BLOC1S3	19	4	0.00099379	0.0035838	0.531849	133	4	2.4595	4	0.02843	0.086043	1	1507	3	1.7811	4	0.14424	0.29244	1	5038	1	-3.8378	4	0.015457	0.050318	0.827753	1153	1	-0.99635
CD47	3	4	0.018704	0.059964	1	1104	3	1.6032	4	0.4512	0.60214	1	10917	1	0.1723	4	0.25321	0.4154	1	7381	2	0.037288	4	0.01548	0.050392	0.828088	1154	2	0.6022
OR13D1	9	4	0.98779	0.98787	1	19724	0	-0.40992	4	0.0063579	0.021883	0.964579	452	4	1.4169	4	0.024809	0.0777	1	1393	4	1.2396	4	0.015499	0.050448	0.828126	1155	3	1.068
CCL15	17	4	0.00054862	0.0020002	0.413063	96	1	0.36451	4	0.88758	0.88724	1	17693	0	0.53829	4	0.016136	0.052379	1	981	3	0.99635	4	0.01551	0.050476	0.828126	1156	2	0.23647
GNG13	16	4	0.94352	0.94353	1	18757	0	0.18975	4	0.096998	0.2131	1	3702	3	1.0809	4	0.50391	0.65148	1	11721	1	0.36831	4	0.01556	0.05065	0.829633	1157	4	0.7109
ABTB2	11	4	0.2869	0.4482	1	7919	2	0.88952	4	0.81394	0.82152	1	16312	1	0.19912	4	0.1763	0.34369	1	5918	3	0.90464	4	0.015574	0.050689	0.829633	1158	4	0.58604
EFNA2	19	4	0.35272	0.50951	1	9166	2	0.7847	4	0.047338	0.12283	1	2164	3	1.6392	4	0.35034	0.5064	1	9306	1	0.087989	4	0.015586	0.05072	0.829633	1159	3	0.86604
HIST1H3G	6	4	0.50255	0.6503	1	11494	2	0.5975	4	0.037865	0.10462	1	1815	3	1.0176	4	0.049261	0.12565	1	2296	1	0.003066	4	0.015598	0.050745	0.829633	1160	4	1.0945
IZUMO2	19	4	0.40772	0.56102	1	9994	2	-0.022689	4	0.00087102	0.0031511	0.54639	116	4	1.8635	4	0.17189	0.33677	1	5804	3	0.93757	4	0.015612	0.050789	0.829633	1161	4	0.8987
TACC3	4	4	0.14183	0.28867	1	4928	2	-0.15151	4	0.058599	0.14397	1	2534	3	1.4608	4	0.33758	0.49444	1	9023	2	0.73287	4	0.015631	0.050848	0.829633	1162	3	1.0043
SBSN	19	4	0.087334	0.19591	1	3463	3	1.1464	4	0.0015586	0.0055975	0.641736	172	2	0.9236	4	0.0031829	0.01123	0.815532	274	2	1.4069	4	0.015646	0.050895	0.829633	1163	3	1.2579
ZNF335	20	4	0.65282	0.72569	1	13506	1	0.29132	4	0.055566	0.13832	1	2434	2	1.2998	4	0.77931	0.79536	1	15581	1	0.30319	4	0.015647	0.050898	0.829633	1164	4	1.0827
CD83	6	4	0.24047	0.40516	1	7047	2	0.47635	4	0.011791	0.039067	1	748	4	1.5819	4	0.80003	0.81005	1	15974	1	0.38661	4	0.015711	0.051094	0.831167	1165	4	0.77625
HNRNPL	19	4	0.00028608	0.0010477	0.296821	71	4	2.5496	4	0.14404	0.29231	1	5017	1	0.6176	4	0.056136	0.13868	1	2564	1	-0.26844	4	0.015721	0.051121	0.831167	1166	3	1.007
BCL2L10	15	4	0.16598	0.32746	1	5543	3	0.92886	4	0.04566	0.11967	1	2096	3	1.5162	4	0.76971	0.78895	1	15422	1	0.034165	4	0.015735	0.051158	0.831167	1167	3	1.0193
LOC113230	3	4	0.61788	0.70956	1	13033	1	-1.3419	4	0.026286	0.081675	1	1430	2	-0.47673	4	0.059384	0.14478	1	2655	3	0.87012	4	0.015759	0.051227	0.83144	1169	2	-0.35979
CLEC2D	12	4	0.11258	0.23993	1	4156	3	1.3419	4	0.49736	0.64551	1	11679	1	-0.92513	4	0.33051	0.48797	1	8876	2	0.70075	4	0.015768	0.051257	0.83144	1170	4	0.54075
MPP4	2	4	0.40557	0.559	1	9957	2	-0.035953	4	0.10931	0.23446	1	4046	1	0.42079	4	0.85033	0.85099	1	16919	1	-0.65262	4	0.015815	0.051408	0.833219	1171	4	0.50807
TROVE2	1	4	0.14536	0.29438	1	5014	2	0.3932	4	0.11482	0.24381	1	4192	3	1.1591	4	0.51475	0.66178	1	11891	1	-0.14874	4	0.015894	0.051647	0.83553	1172	4	0.80656
ARPP21	3	4	0.65785	0.72811	1	13582	1	0.22663	4	0.16216	0.32149	1	5510	3	1.1088	4	0.76455	0.7856	1	15335	1	0.32707	4	0.01593	0.051754	0.83553	1173	4	0.67036
SLC15A3	11	4	0.2685	0.43113	1	7568	2	1.0037	4	0.77075	0.79137	1	15538	1	0.25791	4	0.92665	0.92657	1	18494	0	-0.63636	4	0.015951	0.051807	0.83553	1174	4	0.53063
RAB2A	8	4	0.18051	0.34972	1	5900	2	0.98602	4	0.25953	0.42378	1	7489	1	0.15182	4	0.15348	0.30737	1	5327	3	0.80315	4	0.015995	0.051936	0.83553	1175	4	0.80614
CPEB3	10	4	0.27707	0.43919	1	7736	2	0.63	4	0.41292	0.5663	1	10312	2	0.69333	4	0.10559	0.22769	1	3963	3	1.0791	4	0.015998	0.051942	0.83553	1176	3	1.0333
SNIP1	1	4	0.0072162	0.024688	0.867933	563	3	1.4131	4	0.0992	0.21698	1	3753	2	1.0229	4	0.13676	0.28025	1	4832	2	0.40871	4	0.016005	0.05196	0.83553	1177	3	1.0328
MGAT4A	2	4	0.11905	0.25086	1	4328	3	1.1744	4	0.10621	0.22914	1	3952	1	-2.0895	4	0.27397	0.43488	1	7790	2	0.63767	4	0.016005	0.051961	0.83553	1178	2	0.078058
MATN2	8	4	0.79036	0.80397	1	15690	1	0.25412	4	0.25918	0.42346	1	7480	2	0.65978	4	0.80077	0.81058	1	15985	1	0.4658	4	0.016019	0.052004	0.83553	1179	4	0.62864
RFX3	9	4	0.44321	0.59435	1	10546	2	0.71312	4	0.61469	0.70943	1	13236	1	-0.079703	4	0.50383	0.65141	1	11718	1	0.32897	4	0.016035	0.052066	0.835804	1180	4	0.58779
GOLGA8H	15	4	0.056773	0.14033	1	2509	2	-0.61526	4	0.18451	0.35456	1	6060	1	-0.85709	4	0.36224	0.51747	1	9481	1	-0.81186	4	0.016052	0.052124	0.836069	1181	2	-0.22884
KPNA7	7	4	0.8222	0.82757	1	16292	1	0.1811	4	0.19271	0.36214	1	6223	2	0.70868	4	0.014488	0.047356	1	906	3	1.2862	4	0.016082	0.05221	0.836776	1182	3	1.0174
KRBA1	7	4	0.38718	0.54163	1	9670	2	0.5739	4	0.59139	0.69942	1	12947	1	0.6553	4	0.52211	0.66797	1	12015	1	0.1939	4	0.016101	0.052266	0.836972	1183	3	0.913
OR9G1	11	4	0.59335	0.69891	1	12694	1	-0.12025	4	0.62762	0.71521	1	13399	1	0.25208	4	0.028222	0.084744	1	1528	2	-2.4058	4	0.016113	0.052306	0.836972	1184	2	-0.95293
SNX5	20	4	0.078252	0.17978	1	3182	3	1.3172	4	0.14461	0.29324	1	5024	2	-2.5796	4	0.048403	0.12403	1	2261	2	-2.2546	4	0.01619	0.052544	0.837656	1185	2	-1.6295
SNAP91	6	4	0.09897	0.21642	1	3802	2	0.49885	4	0.45775	0.60831	1	11032	1	-0.0047934	4	0.013971	0.045746	1	880	3	1.2291	4	0.016201	0.052576	0.837656	1186	3	1.2525
AP3M1	10	4	0.076859	0.17729	1	3137	1	-0.41338	4	0.029949	0.08905	1	1550	3	1.547	4	0.15943	0.31695	1	5503	3	0.77918	4	0.016204	0.052588	0.837656	1187	3	1.0358
CDK5R2	2	4	0.37366	0.52903	1	9470	1	0.17515	4	0.34313	0.50129	1	9243	2	0.85502	4	0.74159	0.77142	1	14962	1	0.31628	4	0.016209	0.052608	0.837656	1188	4	0.7926
SLC52A1	17	4	0.039344	0.10723	1	1898	2	-1.2395	4	0.0059384	0.020542	0.962383	421	2	0.94015	4	0.026473	0.081168	1	1455	3	1.6946	4	0.016248	0.052728	0.838395	1189	2	0.52492
FFAR2	19	4	0.91071	0.91057	1	18083	0	-1.3403	4	0.005851	0.020246	0.962383	418	3	2.064	4	0.12372	0.25846	1	4461	2	-1.5649	4	0.016298	0.052881	0.839548	1190	2	0.21734
C10orf131	10	4	0.56299	0.6864	1	12299	1	0.36246	4	0.012236	0.040406	1	775	2	-1.0382	4	0.14157	0.28813	1	4964	2	0.53066	4	0.016298	0.052884	0.839548	1191	2	-0.40281
PHYH	10	4	0.51852	0.66541	1	11742	1	-0.59627	4	0.10771	0.23175	1	4005	2	-0.48916	4	0.035598	0.09937	1	1816	2	1.0241	4	0.016331	0.052979	0.840401	1192	2	0.10139
MNT	17	4	0.064019	0.15388	1	2746	2	0.56281	4	0.011643	0.038635	1	737	2	0.51891	4	0.030259	0.088793	1	1607	2	1.8484	4	0.016376	0.053107	0.841495	1193	2	0.96566
SIGLEC9	19	4	0.00017987	0.00066724	0.262003	50	3	2.8945	4	0.16347	0.32355	1	5547	2	0.54293	4	0.39222	0.54558	1	9939	2	0.12075	4	0.016406	0.053194	0.841495	1194	3	1.1511
SLN	11	4	0.38939	0.54371	1	9706	2	0.89356	4	0.12479	0.26053	1	4450	2	0.97335	4	0.50785	0.65518	1	11793	2	0.69199	4	0.01642	0.053231	0.841495	1195	3	1.2454
PGC	6	4	0.6103	0.70618	1	12928	1	-0.097978	4	0.48558	0.63453	1	11478	2	0.56505	4	0.58162	0.69148	1	12692	1	-0.30385	4	0.016433	0.053268	0.841495	1196	4	0.33783
SERPINA9	14	4	0.79888	0.81005	1	15843	1	-0.11403	4	0.15864	0.31581	1	5412	3	0.9155	4	0.93573	0.93572	1	18677	0	-0.53386	4	0.016453	0.053331	0.841495	1197	4	0.37873
POTED	21	4	0.0022981	0.0082035	0.660495	249	1	-0.87903	4	0.013343	0.043829	1	828	3	1.4883	4	0.47466	0.62385	1	11246	2	-0.038617	4	0.016458	0.05335	0.841495	1198	3	0.50212
HUS1	7	4	0.25226	0.41605	1	7263	2	0.86452	4	0.24875	0.41372	1	7296	2	0.78443	4	0.25081	0.41313	1	7339	2	0.61891	4	0.01647	0.053383	0.841495	1199	4	0.81617
GSPT2	X	4	0.78861	0.80275	1	15659	0	0.48145	4	0.17818	0.34665	1	5897	2	0.78999	4	0.73501	0.76746	1	14846	1	0.49666	4	0.016472	0.053391	0.841495	1200	3	0.80372
ZNF322	6	4	0.10635	0.22925	1	4008	2	0.93361	4	0.31194	0.47237	1	8562	1	0.4481	4	0.011541	0.038333	1	749	2	1.2374	4	0.0165	0.053482	0.841495	1201	2	0.8833
NHSL2	X	4	0.20192	0.36954	1	6321	2	0.63885	4	0.67161	0.73589	1	14010	1	-0.88338	4	0.093526	0.20653	1	3634	2	0.37969	4	0.016505	0.053493	0.841495	1202	3	0.57514
OR4A47	11	4	0.031008	0.090837	1	1610	3	1.4167	4	0.053717	0.13489	1	2370	3	1.058	4	0.15495	0.30973	1	5379	2	-2.6109	4	0.016511	0.053509	0.841495	1203	2	-0.25969
PNPT1	2	4	0.16835	0.33124	1	5590	2	0.99597	4	0.074705	0.17359	1	3044	1	0.072056	4	0.20342	0.36908	1	6455	2	0.24827	4	0.016546	0.0536	0.842269	1204	3	0.76785
PDCL	9	4	0.048183	0.12409	1	2207	3	1.1842	4	0.062188	0.15068	1	2669	3	0.99262	4	0.20822	0.37351	1	6558	2	0.84052	4	0.016574	0.053672	0.842607	1205	3	1.0974
RTN4RL1	17	4	0.057437	0.14157	1	2528	3	1.4124	4	0.17033	0.33442	1	5715	2	0.96939	4	0.15094	0.3033	1	5233	2	0.72098	4	0.016585	0.053705	0.842607	1206	3	1.3789
CACNA1E	1	4	0.49013	0.63866	1	11279	2	0.51503	4	0.9131	0.913	1	18200	0	0.077407	4	0.28628	0.44629	1	8034	2	0.77618	4	0.016635	0.053857	0.84353	1207	4	0.35732
OSBP2	22	4	0.93569	0.93568	1	18598	0	0.16205	4	0.3152	0.47535	1	8645	2	0.73088	4	0.45143	0.6017	1	10877	2	0.49249	4	0.016672	0.053965	0.84353	1208	4	0.71901
C4orf26	4	4	0.005814	0.02011	0.834021	484	4	1.2641	4	0.63766	0.71973	1	13540	1	-0.075763	4	0.099106	0.21641	1	3793	3	0.86337	4	0.01669	0.054023	0.84353	1209	3	0.94964
DDX31	9	4	0.63579	0.71768	1	13280	1	0.31286	4	0.24672	0.41186	1	7263	2	0.31642	4	0.33464	0.49174	1	8962	1	-0.42497	4	0.0167	0.054051	0.84353	1210	3	0.79525
IQCF3	3	4	0.16366	0.3238	1	5487	1	-0.011796	4	0.026561	0.082242	1	1438	2	0.54469	4	0.044602	0.1169	1	2132	3	1.6462	4	0.016714	0.054094	0.84353	1211	4	0.61243
TBC1D10C	11	4	0.020322	0.064741	1	1171	3	1.3357	4	0.10044	0.21915	1	3790	2	-2.9473	4	0.095258	0.20958	1	3676	3	0.87773	4	0.016727	0.054126	0.84353	1212	2	-0.2282
BEND3	6	4	0.13932	0.28461	1	4877	3	1.0122	4	0.11577	0.24543	1	4220	2	0.11633	4	0.72738	0.76302	1	14714	1	0.51856	4	0.016728	0.054129	0.84353	1213	3	0.99901
MAPK9	5	4	0.051758	0.13085	1	2354	2	0.92205	4	0.50226	0.6501	1	11770	2	0.72967	4	0.71789	0.75754	1	14568	1	-0.023704	4	0.016741	0.054173	0.84353	1214	4	0.53634
UVRAG	11	4	0.8046	0.81416	1	15973	1	0.38162	4	0.30642	0.46717	1	8458	2	0.57458	4	0.053523	0.1338	1	2471	3	1.1081	4	0.016755	0.05422	0.84353	1215	3	1.1633
KCNQ3	8	4	0.0065641	0.022566	0.856966	527	3	1.9036	4	0.20381	0.37239	1	6461	2	0.54936	4	0.28911	0.44892	1	8086	1	-0.041187	4	0.016758	0.054229	0.84353	1216	2	0.79111
RBM42	19	4	0.070352	0.16556	1	2935	2	0.66458	4	0.024626	0.077179	1	1355	2	0.57458	4	0.019527	0.062433	1	1134	3	1.6179	4	0.016774	0.054279	0.84353	1217	2	-0.032159
MYH13	17	4	0.013481	0.044249	0.998032	884	4	1.1445	4	0.08961	0.20006	1	3503	2	0.19387	4	0.17295	0.3384	1	5826	3	0.83036	4	0.016785	0.054309	0.84353	1218	3	1.217
CDC42EP2	11	4	0.41569	0.56854	1	10112	2	0.67016	4	0.83411	0.83751	1	16684	1	0.62477	4	0.50456	0.65211	1	11727	1	0.14899	4	0.016826	0.054432	0.844781	1219	4	0.86811
DOCK6	19	4	0.28207	0.44379	1	7813	2	0.14543	4	0.0098217	0.033031	1	635	3	1.5745	4	0.32681	0.48447	1	8802	2	0.76629	4	0.016853	0.054509	0.844881	1220	3	1.2594
CCL5	17	4	0.98249	0.98258	1	19590	0	-0.27897	4	0.11186	0.23884	1	4110	2	1.0639	4	0.20868	0.37394	1	6565	2	0.71279	4	0.016866	0.054555	0.844881	1221	4	0.768
ZNF222	19	4	0.012222	0.040358	0.971179	828	3	1.2626	4	0.016102	0.052267	1	964	3	1.2571	4	0.35098	0.50698	1	9316	1	-1.8375	4	0.016868	0.054564	0.844881	1222	2	-0.15221
FAM53A	4	4	0.49011	0.63865	1	11277	2	0.66851	4	0.082329	0.18726	1	3275	3	1.2239	4	0.31785	0.47597	1	8640	2	0.69025	4	0.016899	0.054639	0.845396	1223	3	0.98786
PROSER3	19	4	0.0068225	0.023397	0.860345	545	3	2.0933	4	0.17565	0.34267	1	5830	2	-0.68354	4	0.027907	0.084141	1	1514	2	1.2434	4	0.016933	0.054717	0.845941	1224	3	1.348
IZUMO1	19	4	0.04184	0.11208	1	1990	2	-0.17821	4	0.0026824	0.0094828	0.778521	240	4	1.6486	4	0.01889	0.060506	1	1101	2	1.4272	4	0.016967	0.054783	0.84631	1225	3	1.4096
RBM39	20	4	0.23875	0.4036	1	7012	2	0.79118	4	0.27775	0.44066	1	7863	2	0.99132	4	0.14956	0.3011	1	5199	2	-0.023729	4	0.01704	0.054942	0.848123	1226	3	1.1819
GLTSCR1	16	4	0.0081415	0.027666	0.903377	613	2	0.12594	4	0.24559	0.41082	1	7238	2	0.36744	4	0.06845	0.1617	1	2937	2	-0.6914	4	0.01709	0.055046	0.848597	1227	2	-0.013552
TPI1	12	4	0.22449	0.39033	1	6745	2	0.83452	4	0.097299	0.21365	1	3710	3	1.2107	4	0.29041	0.45016	1	8109	2	0.65112	4	0.01712	0.05511	0.848597	1228	2	0.51049
SLC35F2	11	4	0.26291	0.42598	1	7462	1	0.17874	4	0.48516	0.63414	1	11468	2	0.81079	4	0.42507	0.57683	1	10453	2	0.51036	4	0.017139	0.055153	0.848597	1229	3	1.0157
SNX12	X	4	0.11756	0.24836	1	4288	2	0.88635	4	0.40825	0.56192	1	10238	2	0.57507	4	0.54425	0.67637	1	12285	1	0.54396	4	0.017151	0.055184	0.848597	1230	3	1.0734
C9orf16	9	4	0.23161	0.39696	1	6872	1	0.49236	4	0.09654	0.21226	1	3692	3	1.4035	4	0.27275	0.43374	1	7762	2	0.86156	4	0.017216	0.055324	0.850097	1231	3	1.0895
WISP2	20	4	0.59434	0.69933	1	12708	1	0.22262	4	0.34497	0.50302	1	9283	1	0.26303	4	0.7174	0.75726	1	14558	1	-0.17045	4	0.017308	0.055527	0.850737	1233	3	0.79063
TLK2	17	4	0.17933	0.34843	1	5873	2	0.91065	4	0.12887	0.26727	1	4581	2	0.91635	4	0.85614	0.85637	1	17042	1	-0.030545	4	0.017309	0.055527	0.850737	1234	3	0.92884
ZNF706	8	4	0.48929	0.63788	1	11268	1	0.16736	4	0.029663	0.088472	1	1541	2	0.74761	4	0.51537	0.66238	1	11900	2	0.75532	4	0.017328	0.055577	0.850737	1235	3	1.0905
MRPS9	2	4	0.016474	0.053393	1	1013	3	1.5778	4	0.24928	0.41421	1	7300	2	-1.9554	4	0.40739	0.56008	1	10165	2	0.74688	4	0.017359	0.055642	0.850737	1236	2	0.33893
ARHGAP18	6	4	0.82822	0.83241	1	16394	1	0.24135	4	0.072714	0.17002	1	2984	2	1.1178	4	0.56866	0.68608	1	12545	1	-0.28623	4	0.017367	0.055661	0.850737	1237	3	0.96044
SIRPB1	20	4	0.94483	0.94482	1	18779	0	-0.23792	4	0.020656	0.065736	1	1176	3	1.7299	4	0.48583	0.63443	1	11423	2	0.39579	4	0.01744	0.055813	0.851692	1238	3	0.94347
NALCN	13	4	0.63873	0.71905	1	13312	1	0.047241	4	0.40561	0.55944	1	10197	1	0.30545	4	0.17756	0.34498	1	5937	2	0.62281	4	0.017445	0.055824	0.851692	1239	3	0.84848
C10orf99	10	4	0.010134	0.033997	0.922013	735	2	1.4631	4	0.43998	0.59165	1	10738	1	-0.7037	4	0.00043935	0.0015922	0.390135	80	3	1.9192	4	0.017459	0.055851	0.851692	1240	2	-0.34633
DHX38	16	4	0.0011453	0.0041292	0.543815	151	4	1.7408	4	0.43215	0.58436	1	10613	2	0.8657	4	0.34212	0.49873	1	9143	2	0.49978	4	0.017483	0.055903	0.851825	1241	3	1.1974
KRTAP21-3	21	4	0.31777	0.47706	1	8498	2	0.60477	4	0.28837	0.45037	1	8072	2	0.62359	4	0.95227	0.95234	1	19019	0	-0.0086331	4	0.017557	0.056059	0.851825	1242	3	0.80565
COIL	17	4	0.32389	0.48279	1	8619	2	0.84282	4	0.17964	0.34891	1	5948	2	1.0279	4	0.75446	0.77929	1	15145	1	0.006074	4	0.017561	0.056066	0.851825	1243	3	1.0052
FZR1	19	4	0.18723	0.3559	1	6030	1	0.30891	4	0.47907	0.62846	1	11364	1	-0.44575	4	0.049722	0.12656	1	2318	1	0.56076	4	0.017564	0.056073	0.851825	1244	3	0.47185
SERPINB3	18	4	0.07762	0.17866	1	3162	2	-1.186	4	0.11582	0.24553	1	4222	2	0.91846	4	0.073896	0.17157	1	3109	2	-0.0066066	4	0.017582	0.056114	0.851825	1245	2	0.23034
CERCAM	9	4	0.49407	0.64229	1	11353	1	0.50387	4	0.52113	0.6679	1	12072	1	0.21832	4	0.041471	0.11085	1	2041	3	0.96259	4	0.017619	0.05619	0.85234	1246	3	1.0555
SORL1	11	4	0.035294	0.09927	1	1768	3	1.2677	4	0.42815	0.58061	1	10552	2	0.97459	4	0.0843	0.19018	1	3394	3	1.2967	4	0.017662	0.056281	0.853078	1247	3	1.3867
PPM1N	19	4	0.093811	0.20731	1	3663	2	0.69254	4	0.39786	0.55214	1	10086	2	0.42591	4	0.16072	0.31902	1	5543	1	-1.4491	4	0.017722	0.056413	0.853513	1248	2	0.21935
STKLD1	9	4	0.45107	0.60176	1	10666	2	0.75693	4	0.47884	0.62824	1	11362	2	0.65872	4	0.49252	0.64072	1	11533	2	0.61204	4	0.017756	0.056487	0.853513	1249	3	0.85712
TBCB	19	4	0.055254	0.13749	1	2450	3	1.5628	4	0.11032	0.23621	1	4078	2	0.94389	4	0.047918	0.12316	1	2245	1	0.30028	4	0.017764	0.056505	0.853513	1250	3	1.5888
CT47A6	X	4	0.095776	0.21079	1	3710	2	0.70815	4	0.29085	0.45269	1	8129	2	0.79003	4	0.021717	0.068842	1	1256	1	0.58445	4	0.017796	0.05658	0.853513	1251	3	1.0379
NUP205	7	4	0.027187	0.083208	1	1471	3	1.605	4	0.043224	0.11503	1	2016	3	1.9592	4	0.019015	0.060892	1	1108	3	1.4091	4	0.017827	0.056657	0.853513	1252	3	1.6918
RAVER2	1	4	0.042275	0.11291	1	2009	1	0.38187	4	0.074887	0.17393	1	3048	2	0.96419	4	0.17915	0.34647	1	5968	2	0.90582	4	0.017835	0.056673	0.853513	1253	3	1.1483
PMEL	12	4	0.35323	0.51003	1	9175	2	0.91262	4	0.02731	0.083788	1	1458	3	1.5631	4	0.067178	0.15939	1	2899	2	0.93349	4	0.017874	0.056754	0.853513	1254	3	1.1872
ANKRD26	10	4	0.20435	0.37178	1	6369	2	0.096319	4	0.47506	0.62469	1	11302	2	0.48802	4	0.10906	0.23365	1	4051	3	0.91118	4	0.01788	0.056767	0.853513	1255	3	0.84112
OR2T12	1	4	0.15269	0.30618	1	5196	2	0.88505	4	0.30849	0.46907	1	8490	1	0.10068	4	0.18953	0.35607	1	6200	1	-0.017256	4	0.01789	0.056788	0.853513	1256	3	0.65343
ABCG5	2	4	0.065314	0.15632	1	2780	2	1.0637	4	0.27191	0.43525	1	7742	2	0.31782	4	0.2332	0.39675	1	7012	2	0.93291	4	0.017912	0.056827	0.853513	1257	2	0.84075
RFPL4AL1	19	4	0.0068615	0.023522	0.861485	547	3	1.6198	4	0.039199	0.10724	1	1865	3	1.781	4	0.053584	0.13391	1	2478	1	0.23029	4	0.017985	0.056994	0.854233	1258	2	0.1693
NTNG1	1	4	0.67378	0.73588	1	13807	1	0.60236	4	0.042063	0.11279	1	1980	2	0.75325	4	0.10213	0.22166	1	3874	3	0.96116	4	0.017985	0.056994	0.854233	1259	2	0.28807
FAM3C	7	4	0.16321	0.32309	1	5476	2	-0.65536	4	0.014153	0.046302	1	864	3	1.8557	4	0.008704	0.029518	1	583	2	1.3862	4	0.018038	0.057099	0.854789	1260	2	0.29429
KMT2D	12	4	0.90755	0.90739	1	18014	0	-0.15104	4	0.62689	0.71488	1	13393	1	0.43852	4	0.13664	0.28006	1	4827	3	0.85964	4	0.018044	0.057116	0.854789	1261	3	0.82724
SOX17	8	4	0.16686	0.32886	1	5561	2	0.51648	4	0.69455	0.74751	1	14330	1	-1.5277	4	0.018719	0.060004	1	1094	4	0.96075	4	0.018082	0.057187	0.854828	1262	2	-0.78094
VKORC1L1	7	4	0.083526	0.18916	1	3343	1	-0.61712	4	0.14921	0.30068	1	5157	1	-0.5391	4	0.0027904	0.0098564	0.809638	243	3	2.0246	4	0.01809	0.057204	0.854828	1263	3	0.43042
PPP1R1B	17	4	0.014426	0.047145	1	922	4	1.2205	4	0.22395	0.39087	1	6835	2	0.64851	4	0.12835	0.26616	1	4591	3	0.89223	4	0.018112	0.057253	0.854921	1264	3	1.0585
GJC2	1	4	0.32995	0.48852	1	8739	2	0.25763	4	0.067353	0.16032	1	2835	2	-2.4766	4	0.32229	0.48013	1	8725	1	-0.70503	4	0.018187	0.0574	0.855831	1265	2	-0.95452
DCANP1	5	4	0.19098	0.35938	1	6103	2	0.84399	4	0.45486	0.60561	1	10991	2	0.28947	4	0.16403	0.32432	1	5612	2	0.85361	4	0.018196	0.057421	0.855831	1266	3	0.88836
EMP3	19	4	0.0077904	0.026547	0.879649	603	2	0.62365	4	0.054146	0.1357	1	2382	3	1.538	4	0.039099	0.10626	1	1946	2	1.04	4	0.018204	0.057441	0.855831	1267	3	1.4476
ANTXR1	2	4	0.27476	0.43706	1	7703	1	-3.2335	4	0.031631	0.09236	1	1604	3	1.4742	4	0.091744	0.20336	1	3578	2	-2.6358	4	0.018269	0.057587	0.857374	1268	2	-1.5739
LRRC59	17	4	0.11672	0.24694	1	4269	2	0.66639	4	0.27797	0.44086	1	7869	2	0.83611	4	0.42111	0.57308	1	10397	2	0.65234	4	0.018367	0.057786	0.859691	1269	3	1.0737
SEC14L1	17	4	0.025998	0.080788	1	1434	2	1.148	4	0.33427	0.4931	1	9043	1	-0.66938	4	0.23381	0.39731	1	7022	2	0.83978	4	0.018441	0.057937	0.861142	1270	2	0.045881
TMEM86B	19	4	9.7152e-05	0.00035688	0.210325	34	4	2.0699	4	0.32437	0.48392	1	8859	1	-2.8942	4	0.03799	0.10404	1	1899	1	0.49678	4	0.018458	0.057976	0.861142	1272	2	-0.30346
RHBDD3	22	4	0.19481	0.36296	1	6181	2	0.43102	4	0.15649	0.31234	1	5359	2	-0.54141	4	0.31071	0.46929	1	8502	2	0.572	4	0.018523	0.058097	0.861142	1273	2	0.65108
OR2T27	1	4	0.9466	0.94662	1	18824	0	0.32151	4	0.27157	0.43492	1	7735	2	1.1031	4	0.023049	0.072625	1	1311	2	1.096	4	0.018556	0.058164	0.861142	1274	3	1.0897
MBOAT7	19	4	0.039021	0.10662	1	1889	1	0.63935	4	0.00081874	0.0029586	0.536125	111	3	2.3346	4	0.581	0.69121	1	12684	1	0.18384	4	0.018564	0.058181	0.861142	1275	3	0.8223
ZNF526	19	4	0.059594	0.14559	1	2592	2	1.0272	4	0.10071	0.21962	1	3793	2	-1.3461	4	0.070771	0.16594	1	3015	3	1.4793	4	0.018616	0.058292	0.861993	1276	2	0.017129
IFNLR1	1	4	0.039625	0.10777	1	1915	3	1.0529	4	0.25376	0.4184	1	7381	2	0.9316	4	0.49452	0.64256	1	11566	1	-1.8395	4	0.018655	0.058374	0.861993	1277	2	-0.36731
TMEM101	17	4	0.041415	0.11124	1	1981	2	-1.8291	4	0.046026	0.12036	1	2108	3	1.6435	4	0.15173	0.30458	1	5265	2	0.99954	4	0.018671	0.058412	0.861993	1278	2	0.27188
IQSEC3	12	4	0.40409	0.5576	1	9929	1	0.23635	4	0.30383	0.46481	1	8404	1	0.25723	4	0.098152	0.21469	1	3771	2	0.6307	4	0.018754	0.058595	0.863943	1279	3	0.86017
MBLAC1	7	4	0.9324	0.93233	1	18532	0	0.30321	4	0.12162	0.25524	1	4378	2	1.0488	4	0.018265	0.058703	1	1080	4	1.399	4	0.018811	0.058722	0.864548	1280	3	1.1036
ZNF610	19	4	0.10555	0.22786	1	3992	2	0.86814	4	0.2839	0.44631	1	7988	2	-1.1502	4	0.097796	0.21408	1	3759	2	1.1218	4	0.018827	0.058757	0.864548	1281	1	-1.0605
CD70	19	4	0.24871	0.41274	1	7209	1	0.39668	4	0.12555	0.26178	1	4479	2	1.0293	4	0.14879	0.29985	1	5180	2	0.90991	4	0.01887	0.058844	0.865197	1282	3	1.2491
C17orf49	17	4	0.05795	0.14256	1	2543	2	0.36631	4	0.083523	0.18934	1	3310	1	-0.29015	4	0.064162	0.15377	1	2804	1	-1.0508	4	0.01894	0.059009	0.866355	1283	2	0.43473
SENP8	15	4	0.17409	0.34026	1	5733	2	0.51515	4	0.18605	0.35598	1	6087	2	0.58646	4	0.016102	0.05227	1	980	4	1.427	4	0.018962	0.059062	0.866496	1284	3	1.0167
YARS	1	4	0.33457	0.49274	1	8817	2	0.15514	4	0.0058144	0.020111	0.962383	416	4	1.7746	4	0.28615	0.44618	1	8031	2	0.5979	4	0.019007	0.059156	0.866848	1285	3	1.1938
NDUFAF6	8	4	0.19418	0.36238	1	6172	2	1.0383	4	0.061088	0.14861	1	2621	1	-0.14082	4	0.029427	0.087152	1	1568	3	0.97747	4	0.019019	0.059184	0.866848	1286	3	0.8883
MCTS1	X	4	0.057593	0.14186	1	2533	2	0.84499	4	0.42858	0.58102	1	10557	1	0.14008	4	0.10696	0.23003	1	4000	2	0.67245	4	0.019035	0.059229	0.866848	1287	2	-0.67418
TNFRSF18	1	4	0.091276	0.20281	1	3591	2	1.1201	4	0.43694	0.58878	1	10692	2	0.28894	4	0.1108	0.23668	1	4102	2	0.37319	4	0.019048	0.059258	0.866848	1289	3	1.3021
FMO2	1	4	0.58885	0.69699	1	12641	1	-0.21234	4	0.012768	0.04206	1	804	4	1.1788	4	0.0069348	0.023764	0.97617	483	4	1.3598	4	0.019138	0.059442	0.868478	1290	3	1.1209
MYO1A	12	4	0.022725	0.071708	1	1295	2	-1.6954	4	0.092342	0.20491	1	3588	3	1.5288	4	0.01682	0.054415	1	1019	4	1.2377	4	0.019185	0.059541	0.868478	1292	2	0.34109
ZNF398	7	4	0.05335	0.1339	1	2396	3	1.1305	4	0.17097	0.33541	1	5731	2	0.72979	4	0.66259	0.72842	1	13743	1	-1.2889	4	0.019194	0.059561	0.868478	1293	2	-1.2756
MPC1	6	4	0.074864	0.17368	1	3085	2	-1.8954	4	0.0034573	0.012149	0.865217	276	3	1.8977	4	0.021203	0.067321	1	1225	4	1.4145	4	0.019195	0.059564	0.868478	1294	2	0.066883
SPRR1A	1	4	0.082115	0.1867	1	3306	3	1.2275	4	0.88656	0.88619	1	17676	0	-0.075529	4	0.21184	0.3769	1	6621	2	0.13345	4	0.019204	0.059585	0.868478	1295	3	0.88373
SYMPK	19	4	0.15564	0.31092	1	5280	2	0.84004	4	0.078812	0.18101	1	3177	3	1.1325	4	0.0040161	0.014077	0.850281	329	2	0.90055	4	0.019247	0.059694	0.869434	1296	3	0.94973
ESRRG	1	4	0.057243	0.14118	1	2521	3	1.2121	4	0.83138	0.83529	1	16635	1	0.1162	4	0.86867	0.86833	1	17281	0	-0.096935	4	0.019283	0.059759	0.869743	1297	3	0.87298
ITGA8	10	4	0.0229	0.072208	1	1304	3	1.8574	4	0.23072	0.39711	1	6958	1	0.096025	4	0.17354	0.33934	1	5845	2	0.51809	4	0.019312	0.059821	0.869931	1299	3	1.4194
USP22	17	4	0.046394	0.12079	1	2139	2	-0.40346	4	0.058779	0.14431	1	2542	3	1.3489	4	0.086088	0.19338	1	3437	3	1.4042	4	0.019327	0.059858	0.869931	1300	3	1.0834
EIF3I	1	4	0.087994	0.19709	1	3487	2	0.65193	4	0.039373	0.10756	1	1874	3	1.7213	4	0.36362	0.51878	1	9499	2	0.27469	4	0.019378	0.059968	0.870898	1301	2	0.93067
CFAP53	18	4	0.40496	0.55842	1	9945	2	0.58547	4	0.056323	0.13971	1	2455	2	-2.6896	4	0.64789	0.72134	1	13550	1	0.60285	4	0.019436	0.060103	0.872227	1302	2	-0.66566
PLXNA3	X	4	0.254	0.41771	1	7300	2	0.77349	4	0.28586	0.44808	1	8016	2	1.0553	4	0.27062	0.43168	1	7726	2	-0.080853	4	0.01947	0.060181	0.872436	1303	2	0.36774
KLRC4	12	4	0.55358	0.68272	1	12193	1	-0.20916	4	0.048536	0.12501	1	2203	2	1.0752	4	0.0046534	0.016224	0.876185	365	3	1.7696	4	0.019495	0.060245	0.872436	1304	2	-0.11436
ADAMTS17	15	4	0.095503	0.2103	1	3704	1	-0.18699	4	0.068026	0.16156	1	2863	1	-0.25289	4	0.2834	0.44363	1	7981	2	0.32977	4	0.01951	0.060269	0.872436	1305	2	-1.2891
OR4A5	11	4	0.26243	0.42554	1	7451	1	0.2879	4	0.086187	0.19407	1	3398	3	1.4969	4	0.48326	0.63197	1	11378	1	0.62052	4	0.019532	0.06032	0.872436	1307	3	1.3256
POLR2H	3	4	0.00046465	0.0016926	0.382523	89	3	2.1917	4	0.39568	0.55008	1	10060	2	0.73091	4	0.46071	0.61051	1	11031	1	0.083408	4	0.019545	0.06035	0.872436	1308	2	0.91129
ST6GALNAC6	9	4	0.38045	0.53537	1	9574	1	-1.0883	4	0.5014	0.6493	1	11753	1	0.63316	4	0.25195	0.41419	1	7357	2	0.18486	4	0.019559	0.060377	0.872436	1309	2	0.39816
ZNF524	19	4	0.11457	0.24327	1	4212	2	0.50483	4	0.19482	0.3641	1	6275	2	1.0888	4	0.11722	0.24757	1	4262	3	0.86179	4	0.01964	0.060542	0.874184	1310	3	1.026
LILRB2	19	4	0.064762	0.15529	1	2764	2	0.66773	4	0.070694	0.1664	1	2934	3	1.4461	4	0.3761	0.53045	1	9683	1	0.48779	4	0.019668	0.060589	0.874238	1311	3	1.0828
TPPP	5	4	0.089566	0.1998	1	3537	3	1.2469	4	0.4276	0.58009	1	10539	2	0.55233	4	0.50064	0.64839	1	11665	1	0.39681	4	0.01972	0.060706	0.874688	1312	3	1.1413
CYP4F22	19	4	0.21138	0.37826	1	6508	2	-1.5743	4	0.024741	0.077502	1	1360	3	1.7037	4	0.011353	0.037777	1	737	2	-2.9562	4	0.01972	0.060707	0.874688	1313	1	-2.178
SAMD14	17	4	0.12812	0.26596	1	4577	3	1.0665	4	0.054647	0.13662	1	2399	3	1.2202	4	0.020781	0.066098	1	1203	2	1.3137	4	0.019766	0.060788	0.87486	1314	3	1.3167
MTM1	X	4	0.0098367	0.033077	0.917399	719	2	-2.5285	4	0.033018	0.095108	1	1648	2	-2.0799	4	0.076736	0.17673	1	3190	2	1.0601	4	0.019773	0.060806	0.87486	1315	1	-1.8636
MYCN	2	4	0.67261	0.73532	1	13796	1	-0.42353	4	0.17031	0.33438	1	5714	2	0.52805	4	0.72867	0.76378	1	14732	1	-0.10828	4	0.019866	0.061004	0.876171	1316	3	0.58808
PNMT	17	4	0.96256	0.96264	1	19159	0	-0.47757	4	0.094296	0.20834	1	3633	3	1.2101	4	0.03719	0.10246	1	1876	3	1.171	4	0.019913	0.061107	0.876171	1317	3	0.891
DNMBP	10	4	0.0011129	0.0040155	0.542063	149	3	2.3776	4	0.63504	0.71855	1	13497	1	-2.2524	4	0.0043769	0.01528	0.861844	350	4	1.8513	4	0.019934	0.061144	0.876171	1318	3	1.0929
PRKRIP1	7	4	0.69909	0.74895	1	14160	1	0.45258	4	0.71523	0.75852	1	14643	1	-0.12696	4	0.049566	0.12625	1	2310	2	0.83524	4	0.019942	0.061159	0.876171	1319	3	1.0168
TNFSF15	9	4	0.0066922	0.022976	0.856966	536	3	1.8613	4	0.17665	0.34422	1	5857	2	-0.090399	4	0.1129	0.24021	1	4151	2	-2.2445	4	0.019943	0.061159	0.876171	1320	2	-0.85109
API5	11	4	0.11953	0.25164	1	4340	2	0.93824	4	0.72487	0.76391	1	14803	1	0.55669	4	0.078269	0.17947	1	3234	3	1.0177	4	0.019977	0.061238	0.876689	1321	3	1.05
PNPLA4	X	4	0.065677	0.157	1	2800	3	1.2313	4	0.20178	0.37053	1	6418	2	0.77705	4	0.71215	0.75434	1	14464	1	0.0048998	4	0.020035	0.061362	0.877168	1322	3	0.92444
PLCG2	16	4	0.027025	0.082861	1	1464	2	1.3398	4	0.72608	0.76459	1	14831	1	-1.7739	4	0.21654	0.38129	1	6704	1	0.16668	4	0.02007	0.061441	0.877168	1323	2	0.35438
GPR55	2	4	0.12915	0.26765	1	4600	2	-0.071493	4	0.16252	0.32207	1	5521	2	0.81548	4	0.50241	0.65003	1	11693	1	-0.15333	4	0.020079	0.061461	0.877168	1324	3	0.77497
SLC16A13	17	4	0.027041	0.082896	1	1465	3	1.3957	4	0.0094575	0.031898	1	614	3	2.0844	4	0.23141	0.39508	1	6965	1	-1.189	4	0.020113	0.061539	0.877168	1325	3	1.0139
TSHZ3	19	4	0.0011105	0.0040096	0.542063	148	3	2.3589	4	0.23079	0.39717	1	6961	2	-0.73916	4	0.032399	0.093035	1	1690	1	0.040738	4	0.020138	0.061596	0.877168	1326	2	0.34631
KCNMB3	3	4	0.70818	0.75382	1	14288	1	0.36526	4	0.59496	0.70096	1	12995	1	0.7279	4	0.86818	0.86787	1	17270	1	0.61307	4	0.020175	0.061671	0.877168	1327	3	1.0155
TMEM72	10	4	0.055211	0.13741	1	2447	3	0.98051	4	0.48111	0.63033	1	11402	1	0.064387	4	0.47083	0.62022	1	11188	1	0.028373	4	0.020176	0.061671	0.877168	1328	3	0.87862
ADAMTS14	10	4	0.043689	0.11565	1	2052	3	1.4429	4	0.092839	0.20579	1	3602	3	1.2639	4	0.2638	0.42533	1	7593	1	0.23689	4	0.020189	0.061698	0.877168	1329	2	0.57858
TRPM4	19	4	0.0025885	0.0091909	0.680729	270	4	1.9354	4	0.30479	0.46568	1	8425	2	0.86797	4	0.16505	0.32594	1	5637	1	0.31108	4	0.020193	0.061708	0.877168	1330	3	1.1336
ANKRD52	12	4	0.033341	0.095452	1	1698	3	1.3721	4	0.18867	0.35835	1	6140	2	-1.0618	4	0.17847	0.34583	1	5956	2	-0.23226	4	0.020241	0.061809	0.8776	1331	2	-0.51992
CCDC9	19	4	0.13009	0.26926	1	4623	2	1.3018	4	0.040559	0.10987	1	1916	2	1.0734	4	0.0037635	0.013195	0.84983	307	2	0.94989	4	0.020248	0.061826	0.8776	1333	3	1.4101
PDZD3	11	4	0.004548	0.015851	0.80309	396	3	1.9824	4	0.24318	0.40862	1	7198	2	0.63306	4	0.18998	0.3565	1	6206	2	0.8312	4	0.020318	0.061961	0.878908	1334	3	1.1257
CES2	16	4	0.50533	0.65294	1	11543	2	0.32495	4	0.12941	0.26819	1	4598	3	1.1505	4	0.20929	0.37449	1	6575	2	0.81384	4	0.020354	0.062049	0.879531	1335	3	1.0867
BCORL1	X	4	0.016801	0.054355	1	1029	3	1.2462	4	0.54869	0.68231	1	12431	1	-0.26911	4	0.0016702	0.005983	0.648752	183	3	1.8751	4	0.020401	0.062154	0.879777	1336	3	1.0643
C3orf80	3	4	0.080319	0.18352	1	3251	3	1.0834	4	0.30788	0.4685	1	8478	2	0.73136	4	0.83371	0.83649	1	16620	1	-0.21155	4	0.020431	0.062222	0.879872	1337	3	0.99659
AKR1A1	1	4	0.52193	0.66861	1	11807	2	0.58894	4	0.40183	0.55593	1	10135	1	0.40541	4	0.089997	0.20027	1	3533	2	0.79155	4	0.020491	0.06235	0.879872	1338	3	0.94626
CLIP2	7	4	0.01749	0.056416	1	1058	3	1.3484	4	0.0016514	0.0059195	0.657814	179	3	2.3193	4	0.79624	0.8072	1	15905	0	0.60811	4	0.020506	0.062376	0.879872	1339	3	1.2142
DBP	19	4	0.040043	0.10859	1	1937	3	1.5352	4	6.8303e-05	0.0002631	0.225545	23	3	2.7953	4	0.019066	0.061064	1	1112	3	1.6531	4	0.020508	0.062379	0.879872	1340	3	1.2744
ACTG2	2	4	0.071517	0.16764	1	2973	2	1.0696	4	0.48636	0.63526	1	11493	2	-0.36407	4	0.76147	0.78367	1	15281	1	0.32187	4	0.020539	0.062441	0.88013	1341	3	0.72876
EFEMP2	11	4	0.50225	0.65002	1	11493	1	0.21188	4	0.13617	0.2795	1	4775	3	1.1106	4	0.095064	0.20922	1	3669	3	0.90021	4	0.020599	0.062573	0.880901	1342	3	0.9855
TAZ	X	4	0.030005	0.088833	1	1571	2	0.69296	4	0.45916	0.60961	1	11064	1	0.39294	4	0.036882	0.10187	1	1863	2	0.54835	4	0.020613	0.0626	0.880901	1343	2	0.38073
CEP85L	6	4	0.020742	0.065983	1	1189	3	1.5624	4	0.21703	0.38455	1	6692	2	0.62226	4	0.050354	0.12774	1	2339	3	1.1454	4	0.020627	0.062627	0.880901	1344	3	1.6427
EDF1	9	4	0.4241	0.57646	1	10252	1	0.51758	4	0.017876	0.057571	1	1044	3	2.0079	4	0.039588	0.10719	1	1963	3	1.2618	4	0.020666	0.062696	0.881247	1345	2	0.62995
C1orf106	1	4	0.89941	0.89922	1	17844	0	-0.70799	4	0.21146	0.37942	1	6592	2	0.91869	4	0.12821	0.26594	1	4586	2	0.29833	4	0.020707	0.062791	0.881973	1346	3	0.92201
SERHL2	22	4	0.29062	0.45171	1	8008	2	0.058309	4	0.34241	0.50066	1	9222	1	-0.7086	4	0.16431	0.32476	1	5623	2	0.49456	4	0.020796	0.062973	0.883725	1347	3	0.60312
KIAA1958	9	4	0.57993	0.6933	1	12526	1	0.6095	4	0.59802	0.70227	1	13035	1	-0.18128	4	0.099143	0.21646	1	3794	2	1.0182	4	0.02085	0.063086	0.883725	1348	3	0.98254
WRNIP1	6	4	0.096189	0.2115	1	3722	2	-1.7774	4	0.10711	0.23068	1	3988	2	1.1228	4	0.044478	0.11665	1	2128	2	1.0179	4	0.020876	0.063139	0.883725	1349	2	-0.11455
CXorf38	X	4	0.0090442	0.030588	0.908109	673	3	1.7192	4	0.10813	0.23242	1	4016	2	0.87347	4	0.32961	0.48711	1	8858	2	0.91762	4	0.020878	0.063144	0.883725	1350	3	1.0765
NOS1AP	1	4	0.84171	0.84366	1	16649	1	0.0035994	4	0.13203	0.27257	1	4667	3	1.2107	4	0.17219	0.33721	1	5812	2	0.61137	4	0.020895	0.06318	0.883725	1351	2	0.43542
CPEB2	4	4	0.31883	0.47805	1	8517	1	0.35362	4	0.80475	0.81471	1	16145	0	-0.15079	4	0.0052483	0.018205	0.905916	398	2	0.66026	4	0.020934	0.063266	0.884315	1352	2	0.59969
CHAD	17	4	0.73821	0.77078	1	14756	1	-0.40161	4	0.10562	0.22811	1	3940	2	0.35123	4	0.1048	0.22626	1	3943	2	0.73755	4	0.021011	0.063418	0.885218	1353	3	0.84979
ARL6	3	4	0.13774	0.28202	1	4826	1	0.232	4	0.13318	0.27445	1	4685	2	0.24658	4	0.31802	0.47613	1	8643	2	0.70179	4	0.021112	0.063629	0.887031	1354	3	0.72419
PSG3	19	4	0.19279	0.36109	1	6148	2	0.88213	4	0.44726	0.59843	1	10861	2	0.72895	4	0.028555	0.085406	1	1537	3	1.4717	4	0.021115	0.063637	0.887031	1355	3	1.173
ZNF572	8	4	0.074338	0.17272	1	3070	1	-5.3857	4	0.0126	0.041538	1	795	2	-0.63911	4	0.014772	0.048184	1	919	2	1.262	4	0.021138	0.063686	0.887109	1356	1	-2.611
SMC6	2	4	0.47786	0.62716	1	11088	1	-1.4852	4	0.77386	0.79337	1	15589	0	-2.2492	4	0.00023311	0.00085183	0.329494	52	3	2.1698	4	0.021256	0.063936	0.889074	1357	2	-0.8596
OLFML2B	1	4	0.18556	0.35435	1	6005	1	0.48369	4	0.10832	0.23278	1	4021	3	1.1399	4	0.60653	0.70221	1	12979	1	0.67283	4	0.021264	0.063954	0.889074	1358	3	1.3288
TVP23C	17	4	0.018831	0.060352	1	1108	2	0.76662	4	0.00028106	0.0010221	0.364203	55	2	-1.3886	4	0.13048	0.26971	1	4655	2	-1.0111	4	0.021296	0.064011	0.889074	1359	1	-1.5372
TMEM167A	5	4	0.13772	0.28198	1	4825	1	-5.4934	4	0.33137	0.49048	1	8994	2	1.171	4	0.017789	0.057306	1	1055	2	1.2693	4	0.021348	0.064125	0.889074	1360	1	-1.4745
ERVV-1	19	4	0.033631	0.096031	1	1709	3	1.2621	4	0.092797	0.20571	1	3601	3	1.3071	4	0.18281	0.34984	1	6056	2	-0.23584	4	0.021361	0.064153	0.889074	1361	3	1.1064
LRRCC1	8	4	0.26333	0.4264	1	7472	2	0.28194	4	0.15615	0.31178	1	5347	2	1.224	4	0.018524	0.059435	1	1089	4	0.88523	4	0.02137	0.064172	0.889074	1362	3	1.2517
CPNE1	20	4	0.058785	0.14408	1	2567	3	0.99457	4	0.023198	0.07307	1	1293	3	1.5213	4	0.23468	0.39817	1	7038	1	-0.56685	4	0.021374	0.064181	0.889074	1363	3	0.95056
ERCC1	19	4	0.088678	0.19829	1	3514	2	0.80289	4	0.23978	0.40553	1	7126	2	0.24226	4	0.00031188	0.0011349	0.342766	66	2	1.8245	4	0.021453	0.064366	0.890636	1364	3	1.2544
OR52W1	11	4	0.21607	0.38262	1	6592	2	0.093836	4	0.16225	0.32164	1	5516	3	1.004	4	0.27198	0.43301	1	7748	2	0.54987	4	0.021463	0.064382	0.890636	1365	3	0.96704
SMARCA5	4	4	0.75753	0.78247	1	15107	1	0.089085	4	0.33382	0.4927	1	9033	2	0.87942	4	0.1575	0.31387	1	5447	1	0.41316	4	0.02152	0.064517	0.891882	1366	3	1.0531
TRMT112	11	4	0.8045	0.81409	1	15966	1	-0.11094	4	0.87597	0.87564	1	17461	0	0.19192	4	0.060409	0.14667	1	2687	3	1.1938	4	0.021551	0.064586	0.892221	1367	3	0.85808
MBD3L5	19	4	0.23957	0.40439	1	7033	2	0.68597	4	0.12525	0.26128	1	4466	2	0.45298	4	0.44554	0.59609	1	10771	1	0.0209	4	0.021622	0.064726	0.893442	1368	3	0.98213
CDC42EP3	2	4	0.01515	0.049341	1	952	3	1.2963	4	0.22921	0.3957	1	6931	2	0.83942	4	0.1619	0.321	1	5566	2	0.95303	4	0.02164	0.064763	0.893442	1369	3	1.1088
GDF1	19	4	0.016549	0.053608	1	1019	2	1.1246	4	0.1146	0.24343	1	4185	2	0.95301	4	0.029099	0.08651	1	1556	3	1.1722	4	0.021733	0.064977	0.894751	1371	3	1.3421
TMC4	19	4	0.19284	0.36114	1	6150	2	0.98442	4	0.06521	0.15637	1	2768	3	1.4984	4	0.0073704	0.025173	0.977997	510	2	-1.9248	4	0.021768	0.065057	0.894751	1372	2	-0.32803
NANOS2	19	4	0.12693	0.264	1	4546	2	1.068	4	0.085973	0.19365	1	3386	1	-1.6193	4	0.015961	0.051844	1	975	2	0.613	4	0.02182	0.065175	0.894751	1373	3	0.5121
SPPL2A	15	4	0.08236	0.18713	1	3311	3	1.3594	4	0.39289	0.54744	1	10009	2	0.87098	4	0.33527	0.4923	1	8980	2	0.61679	4	0.02185	0.065226	0.894751	1374	2	0.50492
RLN3	19	4	0.080481	0.18381	1	3258	3	1.3116	4	0.03389	0.096825	1	1671	2	0.87512	4	0.24255	0.40545	1	7178	2	0.01767	4	0.021859	0.065247	0.894751	1375	2	0.27684
PARVA	11	4	0.022613	0.071391	1	1287	4	1.6017	4	0.032557	0.094206	1	1633	1	0.20761	4	0.61993	0.70822	1	13168	1	0.20831	4	0.021863	0.065256	0.894751	1376	3	1.2464
ADGRF3	2	4	0.17707	0.34488	1	5812	3	0.83944	4	0.88876	0.88842	1	17712	0	0.16273	4	0.030324	0.088927	1	1612	3	1.0938	4	0.021867	0.065258	0.894751	1377	3	1.1718
SCO1	17	4	0.056285	0.13939	1	2492	2	-0.87263	4	0.024315	0.076293	1	1341	1	-0.055497	4	0.016815	0.054404	1	1018	3	1.5248	4	0.021873	0.065269	0.894751	1378	1	-1.2028
PSME2	14	4	0.12619	0.26275	1	4519	3	1.0262	4	0.67558	0.73783	1	14062	1	0.5188	4	0.25772	0.41966	1	7465	2	0.66291	4	0.021903	0.06534	0.894751	1379	3	0.88171
CARD8	19	4	0.0014807	0.0053308	0.561376	191	4	2.0539	4	0.67038	0.7353	1	13993	1	-0.34951	4	0.077053	0.17731	1	3199	1	-0.47869	4	0.021925	0.065384	0.894751	1380	1	-0.043279
TTC12	11	4	0.09789	0.21452	1	3772	3	1.0765	4	0.22276	0.38979	1	6817	2	0.45636	4	0.35018	0.50623	1	9301	1	0.032979	4	0.021961	0.065457	0.894751	1381	3	1.1401
PNCK	X	4	0.44558	0.59655	1	10582	2	0.40222	4	0.14701	0.29713	1	5084	3	1.0395	4	0.43224	0.58362	1	10565	2	0.66749	4	0.021992	0.06552	0.894751	1382	3	0.72056
PSPN	19	4	0.13272	0.27361	1	4686	2	0.94011	4	0.1958	0.36501	1	6293	2	0.38283	4	0.10457	0.22586	1	3936	3	1.08	4	0.022009	0.065564	0.894751	1383	3	1.3454
CERS1	19	4	0.21796	0.38435	1	6622	2	0.75818	4	0.29978	0.46103	1	8332	2	0.76725	4	0.031163	0.090604	1	1642	3	1.2792	4	0.022019	0.065583	0.894751	1384	3	1.0335
SEMA3E	7	4	0.14748	0.29781	1	5056	2	1.0026	4	0.14178	0.28867	1	4944	2	-0.49881	4	0.059889	0.14573	1	2671	3	1.3197	4	0.02203	0.065602	0.894751	1385	3	0.74936
ACAD10	12	4	0.14217	0.2892	1	4932	2	0.99681	4	0.3132	0.47352	1	8594	2	-0.79171	4	0.054993	0.13657	1	2525	2	1.0256	4	0.022036	0.065614	0.894751	1386	2	0.90741
TCEA2	20	4	0.13194	0.27233	1	4667	2	0.88935	4	0.34428	0.50237	1	9268	2	0.14343	4	0.017927	0.057713	1	1064	4	1.116	4	0.022136	0.065805	0.896489	1387	3	1.0463
SPCS3	4	4	0.13588	0.27892	1	4771	1	0.3281	4	0.038795	0.10645	1	1848	3	1.1944	4	0.23815	0.40139	1	7091	1	0.099271	4	0.022152	0.06583	0.896489	1388	3	1.1553
ABO	9	4	0.17969	0.34897	1	5883	1	-1.8161	4	0.049683	0.12722	1	2240	2	1.1444	4	0.038717	0.10549	1	1925	3	1.2809	4	0.022187	0.065906	0.896719	1389	2	0.22227
CFI	6	4	0.54864	0.6808	1	12130	1	0.21525	4	0.8242	0.82951	1	16492	1	0.26116	4	0.85861	0.85874	1	17092	1	0.29957	4	0.022222	0.06598	0.896719	1390	3	0.7617
RBX1	22	4	0.033497	0.095775	1	1703	3	1.1561	4	0.14656	0.29642	1	5076	2	1.0846	4	0.63962	0.71736	1	13433	1	-1.2563	4	0.022223	0.065981	0.896719	1391	2	0.79027
WDR83	19	4	0.10338	0.22402	1	3928	3	1.053	4	0.3073	0.46798	1	8468	2	0.75733	4	0.11529	0.24431	1	4205	1	-2.2186	4	0.022345	0.066232	0.898871	1392	1	-0.46997
SRPK3	X	4	0.83565	0.83852	1	16541	1	0.51666	4	0.77972	0.79725	1	15698	1	0.44921	4	0.10351	0.22399	1	3918	2	0.84192	4	0.022385	0.066304	0.898871	1393	3	0.93329
RECK	9	4	0.024472	0.07672	1	1371	3	1.5273	4	0.039531	0.10787	1	1883	2	1.2361	4	0.92924	0.92913	1	18557	0	0.26265	4	0.022403	0.066334	0.898871	1394	3	1.0054
ARHGAP44	17	4	0.063963	0.15377	1	2743	2	0.38249	4	0.65672	0.7287	1	13808	1	-0.71856	4	0.02578	0.079769	1	1425	2	1.1245	4	0.022444	0.066419	0.898871	1395	3	1.0216
OR3A3	17	4	0.50857	0.65597	1	11595	2	0.38206	4	0.10676	0.23004	1	3970	3	1.0696	4	0.0080752	0.027467	0.991868	550	4	1.3508	4	0.022455	0.066442	0.898871	1396	3	0.85538
ECE1	1	4	0.52313	0.66979	1	11827	2	0.59648	4	0.36198	0.51869	1	9567	2	0.49578	4	0.025498	0.079227	1	1418	2	1.2015	4	0.022467	0.066467	0.898871	1397	3	0.9916
UBE2L6	11	4	0.75276	0.77956	1	15027	1	-0.046312	4	0.19325	0.36265	1	6238	2	0.7275	4	0.92195	0.92183	1	18403	0	-0.17095	4	0.02248	0.066497	0.898871	1398	3	0.78435
RPGRIP1	14	4	0.011858	0.039281	0.960366	815	1	-1.094	4	0.064019	0.15412	1	2728	3	1.2547	4	0.0071069	0.024334	0.97617	492	3	0.87542	4	0.022555	0.066675	0.899977	1399	3	0.54924
TULP2	19	4	0.0031247	0.011034	0.718238	308	3	1.9578	4	0.026509	0.082126	1	1437	1	-2.2204	4	0.066018	0.15722	1	2859	2	1.0597	4	0.022569	0.066713	0.899977	1400	2	0.17814
SPACA4	19	4	0.025973	0.080733	1	1433	3	1.6755	4	0.0099068	0.033284	1	639	3	1.9646	4	0.63379	0.71458	1	13354	1	0.61565	4	0.022607	0.066788	0.900277	1401	3	1.0181
OPN1SW	7	4	0.56377	0.68672	1	12304	1	0.17707	4	0.72903	0.76631	1	14877	1	0.44021	4	0.16471	0.32541	1	5632	3	0.96406	4	0.022644	0.066871	0.900291	1402	3	0.92744
ST20-MTHFS	15	4	0.011173	0.037211	0.947418	784	2	-2.0726	4	0.10309	0.22368	1	3865	2	1.2762	4	0.34743	0.50369	1	9256	2	0.71672	4	0.022698	0.066987	0.901252	1403	2	-0.099716
DDAH2	6	4	0.057545	0.14177	1	2532	2	0.71333	4	0.24382	0.4092	1	7211	2	0.85619	4	0.8547	0.85501	1	17009	1	-0.02349	4	0.022754	0.067111	0.901693	1404	3	1.0307
STARD9	15	4	0.21666	0.38314	1	6604	1	-0.33109	4	0.67624	0.73814	1	14071	1	0.49678	4	0.1334	0.2746	1	4738	2	0.52224	4	0.022788	0.067173	0.901693	1405	3	0.92365
CSRP3	11	4	0.95311	0.9532	1	18960	0	-0.17543	4	0.829	0.83334	1	16583	1	0.45319	4	0.01772	0.057098	1	1051	4	0.94332	4	0.022809	0.067225	0.901693	1406	3	0.73753
ZNF575	19	4	0.22454	0.39038	1	6747	2	0.65604	4	0.013331	0.04379	1	827	2	0.79793	4	0.070795	0.16597	1	3018	2	0.97123	4	0.022817	0.067244	0.901693	1407	3	0.90491
RUNDC3B	7	4	0.59094	0.69786	1	12665	1	0.508	4	0.080247	0.1836	1	3213	1	0.034809	4	0.15596	0.31135	1	5405	3	0.9076	4	0.022943	0.067481	0.903068	1408	3	0.90166
FIZ1	19	4	0.091575	0.20336	1	3604	3	1.1382	4	0.49717	0.64533	1	11674	1	0.40477	4	0.080882	0.18418	1	3310	2	0.88614	4	0.022974	0.067543	0.903297	1409	3	1.145
APH1B	15	4	0.24901	0.41302	1	7216	2	0.73919	4	0.75862	0.78379	1	15362	1	0.23635	4	0.5061	0.65358	1	11759	1	-0.25961	4	0.023025	0.067652	0.903467	1410	3	0.71211
DHX32	10	4	0.16522	0.32624	1	5529	3	1.0247	4	0.090368	0.20138	1	3525	2	0.82548	4	0.86011	0.86017	1	17126	1	-0.1472	4	0.02305	0.067701	0.903467	1411	3	0.91965
GRHL1	2	4	0.68667	0.74241	1	13993	1	0.18025	4	0.17528	0.34211	1	5818	3	0.87993	4	0.23287	0.39642	1	6999	1	-0.06359	4	0.023053	0.067705	0.903467	1412	3	0.82321
CMC4	X	4	0.035478	0.099663	1	1774	2	0.15821	4	0.13004	0.26925	1	4617	3	1.329	4	0.038249	0.10457	1	1910	1	-3.3005	4	0.023079	0.067764	0.903467	1413	1	-0.74681
LGALS4	19	4	0.079365	0.18182	1	3220	3	1.4822	4	0.055948	0.13902	1	2444	2	0.63309	4	0.029718	0.087723	1	1579	1	0.35497	4	0.023123	0.067859	0.903918	1414	3	1.1839
XKR8	1	4	0.50339	0.65112	1	11508	1	-0.14267	4	0.85438	0.85503	1	17052	1	0.39152	4	0.030097	0.088471	1	1596	3	1.1962	4	0.023146	0.067919	0.904119	1415	3	0.89029
C11orf16	11	4	0.45664	0.60703	1	10754	2	0.41938	4	0.44119	0.5928	1	10758	1	0.49084	4	0.47421	0.62342	1	11240	2	0.61786	4	0.023215	0.06807	0.904895	1417	3	0.85067
UBA2	19	4	0.034874	0.098456	1	1753	3	1.5047	4	0.016051	0.052121	1	963	3	1.4271	4	0.046238	0.12002	1	2188	3	1.5192	4	0.023236	0.068115	0.904895	1418	3	0.51082
OR5AU1	14	4	0.11616	0.24598	1	4254	3	1.1948	4	0.034797	0.098606	1	1711	2	1.1229	4	0.63177	0.71362	1	13328	1	0.31039	4	0.023259	0.068157	0.904895	1419	3	1.0515
SPAM1	7	4	0.002454	0.0087518	0.671073	261	3	1.8831	4	0.90592	0.90576	1	18054	0	-2.0635	4	0.015208	0.049531	1	940	4	0.95794	4	0.023341	0.068346	0.905569	1420	2	0.25541
ALOX5	10	4	0.073201	0.1707	1	3033	2	1.1131	4	0.11951	0.2517	1	4322	3	1.1393	4	0.37659	0.5309	1	9690	2	0.70031	4	0.023346	0.068356	0.905569	1421	3	1.341
OR6S1	14	4	0.096368	0.21181	1	3727	3	1.3949	4	0.087281	0.196	1	3429	2	-0.66564	4	0.028975	0.08627	1	1553	2	0.76729	4	0.023359	0.068388	0.905569	1422	2	0.74645
TRIM33	1	4	0.57285	0.69042	1	12426	1	-0.27452	4	0.0051018	0.017737	0.944028	372	4	2.0349	4	0.25573	0.41779	1	7426	2	0.6885	4	0.02336	0.068388	0.905569	1423	3	1.2641
CPS1	2	4	0.48659	0.63535	1	11230	2	0.56273	4	0.036077	0.10112	1	1760	2	1.4699	4	0.0067312	0.0231	0.97617	467	3	1.5556	4	0.023396	0.068468	0.905713	1424	3	0.99403
DDX39B	6	4	0.10851	0.23297	1	4067	2	-2.487	4	0.26379	0.4277	1	7582	2	0.62156	4	0.00077164	0.0027918	0.51561	108	4	2.4048	4	0.023405	0.068489	0.905713	1425	2	0.018719
CTNNBIP1	1	4	0.85703	0.85737	1	16962	0	-0.23888	4	0.74127	0.77337	1	15065	1	0.36165	4	0.063923	0.15329	1	2795	2	0.016678	4	0.023432	0.068548	0.905898	1426	2	0.44583
MFSD7	2	4	0.61116	0.70655	1	12941	1	0.17757	4	0.318	0.47798	1	8710	2	0.9131	4	0.38145	0.53547	1	9774	2	0.6245	4	0.023476	0.068634	0.906435	1427	3	0.9599
ESD	13	4	0.40209	0.55576	1	9895	2	0.66535	4	0.015757	0.051223	1	948	3	1.7231	4	0.55425	0.68032	1	12404	1	0.073893	4	0.023565	0.068832	0.908452	1428	3	0.87627
ZNF347	19	4	0.89374	0.89344	1	17728	0	-0.66565	4	0.0064284	0.022116	0.964983	457	4	1.6522	4	0.03543	0.09904	1	1807	3	1.3609	4	0.023664	0.069054	0.90917	1429	3	1.1635
C5	X	4	0.88312	0.88283	1	17518	0	-0.3708	4	0.00038572	0.0014026	0.410604	67	4	2.0889	4	0.73441	0.76709	1	14837	1	-0.48564	4	0.023682	0.069097	0.90917	1430	3	0.94231
ABCC6	16	4	0.11416	0.24257	1	4202	2	0.87754	4	0.8216	0.82745	1	16440	0	-2.302	4	0.00059154	0.0021666	0.455394	95	3	2.3849	4	0.023707	0.069148	0.90917	1431	2	0.49645
OR10AD1	12	4	0.56943	0.68898	1	12380	1	0.49764	4	0.084297	0.19069	1	3329	3	1.218	4	0.62196	0.70913	1	13199	1	-0.35343	4	0.023711	0.069157	0.90917	1432	3	1.0038
GPR3	1	4	0.18073	0.34992	1	5905	2	0.39657	4	0.82096	0.82695	1	16428	1	-0.076263	4	0.40315	0.55607	1	10096	2	0.59159	4	0.023729	0.069197	0.90917	1433	3	0.86593
SYT2	1	4	0.1164	0.2464	1	4260	2	-1.1949	4	0.60863	0.70675	1	13167	1	-0.77118	4	0.070625	0.16569	1	3010	3	1.1489	4	0.023753	0.069243	0.90917	1434	2	-0.95206
LAIR2	19	4	0.0012232	0.004428	0.553195	161	3	2.119	4	0.74848	0.77771	1	15188	1	-1.834	4	0.0026674	0.0094346	0.809638	231	4	1.6802	4	0.02376	0.069255	0.90917	1435	2	0.72525
ZSWIM7	17	4	0.33458	0.49275	1	8818	2	0.85183	4	0.025905	0.080757	1	1417	4	0.96092	4	0.53949	0.67455	1	12223	1	0.11382	4	0.023772	0.069281	0.90917	1436	3	0.84724
ZFP1	16	4	0.09817	0.215	1	3781	2	0.68228	4	0.54588	0.68124	1	12395	1	0.46801	4	0.84789	0.84878	1	16870	1	0.073242	4	0.02388	0.069502	0.911314	1438	3	0.87396
ZDHHC20	13	4	0.42395	0.57632	1	10250	2	0.82232	4	0.060466	0.14744	1	2603	3	1.063	4	0.14226	0.28924	1	4984	2	0.55037	4	0.023956	0.069657	0.912758	1440	3	1.1651
FUNDC1	X	4	0.27333	0.43571	1	7666	1	0.13456	4	0.020142	0.064235	1	1155	4	1.3629	4	0.76201	0.78402	1	15291	1	0.17122	4	0.023998	0.069742	0.912826	1441	3	0.95537
BACH2	6	4	0.064647	0.15509	1	2763	2	-1.7773	4	0.33473	0.49354	1	9054	1	0.25117	4	0.0072959	0.024941	0.977997	506	3	1.1932	4	0.024022	0.069792	0.912826	1442	2	-0.29715
TMEM143	19	4	0.025495	0.079624	1	1413	3	1.4845	4	0.015459	0.050321	1	933	2	0.93904	4	0.39757	0.55072	1	10012	1	-3.6056	4	0.024026	0.069798	0.912826	1443	2	-0.018912
CIAO1	2	4	0.56124	0.68569	1	12276	1	0.20249	4	0.31621	0.47631	1	8663	2	0.69379	4	0.042284	0.11244	1	2063	3	1.1779	4	0.02406	0.069869	0.912947	1444	3	0.95648
ZNF860	3	4	0.11622	0.24608	1	4257	1	-1.0178	4	0.11141	0.23807	1	4103	2	0.64827	4	0.14063	0.28664	1	4936	2	0.99115	4	0.024127	0.070013	0.912947	1445	2	0.29673
IFT20	17	4	0.15291	0.30652	1	5204	3	0.8693	4	0.067082	0.15979	1	2825	3	1.3141	4	0.55228	0.67952	1	12379	1	-0.0058109	4	0.024141	0.070035	0.912947	1446	3	1.0688
ZNF614	19	4	0.0049936	0.017373	0.818766	424	2	-0.86087	4	0.097544	0.21408	1	3717	1	-1.1538	4	0.24517	0.40788	1	7227	2	-1.774	4	0.024144	0.070038	0.912947	1447	1	-1.9781
ARMCX4	X	4	0.32818	0.48689	1	8701	2	-2.3101	4	0.001761	0.0063054	0.672277	184	3	1.979	4	0.10315	0.22338	1	3904	3	1.3601	4	0.024159	0.070063	0.912947	1448	2	0.48836
CEP104	1	4	0.10808	0.23222	1	4055	2	0.81992	4	0.80919	0.81796	1	16232	1	0.038147	4	0.26877	0.42993	1	7688	2	0.5827	4	0.024196	0.070137	0.912947	1449	2	0.62151
PROP1	5	4	0.43482	0.58652	1	10422	1	-0.47584	4	0.42799	0.58046	1	10548	2	0.40735	4	0.14658	0.29627	1	5101	2	0.80683	4	0.024205	0.070158	0.912947	1450	3	0.86197
OR56B1	11	4	0.0072678	0.024847	0.867933	570	3	1.5454	4	0.85531	0.85587	1	17072	1	0.17258	4	0.17134	0.33592	1	5788	2	0.75135	4	0.024241	0.070232	0.912947	1451	3	0.98984
SLC22A16	6	4	0.10351	0.22425	1	3932	2	0.81175	4	0.79024	0.80439	1	15881	0	-0.069162	4	0.3587	0.51421	1	9434	2	0.74942	4	0.024255	0.070262	0.912947	1453	3	0.86341
SDC3	1	4	0.85025	0.85115	1	16828	0	0.060476	4	0.80753	0.81675	1	16192	1	0.34612	4	0.45811	0.60805	1	10977	2	0.60855	4	0.024303	0.070366	0.913626	1454	3	0.80548
VRK2	2	4	0.0030147	0.010656	0.709708	302	3	1.775	4	0.046248	0.12079	1	2119	1	-1.5055	4	0.013339	0.043817	1	848	3	1.6628	4	0.024336	0.070438	0.913626	1455	3	0.3594
RAB24	5	4	0.22208	0.38812	1	6697	2	0.84235	4	0.63543	0.71872	1	13503	1	0.51405	4	0.051965	0.1308	1	2410	3	0.99152	4	0.024341	0.07045	0.913626	1456	3	1.08
C11orf68	11	4	0.31609	0.47548	1	8467	2	0.47162	4	0.75812	0.78348	1	15354	1	0.15969	4	0.13039	0.26955	1	4651	3	0.96589	4	0.024379	0.070524	0.913988	1457	3	0.91392
ZNF467	7	4	0.72747	0.76458	1	14593	1	-0.072917	4	0.13556	0.27846	1	4754	3	0.90243	4	0.19493	0.36118	1	6288	2	0.71254	4	0.024409	0.070587	0.914004	1459	3	0.87404
PRR20C	13	4	0.19652	0.36456	1	6216	2	0.85664	4	0.34655	0.50449	1	9314	1	-0.46223	4	0.17618	0.34349	1	5915	2	0.41774	4	0.024446	0.07066	0.914004	1460	3	0.85823
DCDC5	16	4	0.93051	0.93042	1	18497	0	0.070968	4	0.52737	0.67382	1	12184	2	0.57319	4	0.098548	0.2154	1	3779	3	1.0225	4	0.024499	0.070757	0.914004	1461	3	0.94567
VAX1	10	4	0.13039	0.26972	1	4629	3	1.142	4	0.26838	0.4319	1	7678	2	1.0812	4	0.97226	0.97227	1	19419	0	-0.23647	4	0.024504	0.070769	0.914004	1462	3	0.90009
CLEC18B	16	4	0.5364	0.67616	1	11989	1	0.26571	4	0.2054	0.37384	1	6487	2	0.84735	4	0.36495	0.52002	1	9518	2	0.51668	4	0.024533	0.070837	0.914004	1463	3	0.92646
SLITRK1	13	4	0.024711	0.07742	1	1378	3	1.4625	4	0.86217	0.86225	1	17202	1	0.46047	4	0.88645	0.88609	1	17660	0	0.23778	4	0.024537	0.070845	0.914004	1464	3	1.0222
KIFC1	6	4	0.029146	0.087163	1	1535	2	0.54348	4	0.022196	0.070191	1	1253	2	1.0057	4	0.87418	0.87384	1	17410	0	0.4582	4	0.024557	0.070888	0.914004	1465	3	0.98519
RTTN	18	4	0.064614	0.15503	1	2761	2	1.1605	4	0.29676	0.45813	1	8263	1	-0.11542	4	0.075946	0.17534	1	3169	2	1.0381	4	0.024598	0.070983	0.914089	1466	3	0.42418
EWSR1	22	4	0.0098957	0.033255	0.917399	725	4	1.4212	4	0.52628	0.6728	1	12171	2	0.66918	4	0.38675	0.54045	1	9857	1	-0.066469	4	0.024614	0.071017	0.914089	1468	3	1.2431
GIGYF1	7	4	0.0061916	0.021351	0.844298	506	2	-1.9898	4	0.64359	0.72256	1	13619	0	-3.3602	4	0.23794	0.4012	1	7086	1	-0.090477	4	0.024628	0.07105	0.914089	1469	2	-1.8977
GPX7	1	4	0.16233	0.32172	1	5449	3	0.90246	4	0.22758	0.39421	1	6894	1	0.64716	4	0.13114	0.27084	1	4672	3	0.75983	4	0.024662	0.071122	0.914089	1470	3	1.0148
CCNC	6	4	0.079288	0.18167	1	3218	3	1.3502	4	0.016505	0.053493	1	985	3	1.7259	4	0.0035264	0.012394	0.840067	294	2	1.5851	4	0.024702	0.071204	0.914131	1471	2	0.95798
TP53I13	17	4	0.84945	0.85044	1	16807	1	0.11275	4	0.15085	0.3033	1	5203	2	0.78202	4	0.81894	0.82436	1	16330	1	0.21852	4	0.02472	0.071238	0.914131	1472	3	0.69044
SAMD5	6	4	0.61861	0.70989	1	13045	1	0.26362	4	0.0075329	0.0257	0.990336	517	3	1.5416	4	0.029492	0.087267	1	1573	3	1.4009	4	0.024736	0.071264	0.914131	1473	2	0.197
SCP2D1	20	4	0.19898	0.36677	1	6263	2	1.0838	4	0.90342	0.9032	1	18007	0	-0.044664	4	0.017873	0.057562	1	1058	4	1.1893	4	0.024793	0.071385	0.914552	1474	3	1.1809
CEBPG	2	4	0.016104	0.052274	1	990	3	1.7503	4	0.0060194	0.020792	0.962383	428	2	0.065114	4	0.0038446	0.013492	0.84983	311	3	2.0443	4	0.024964	0.071722	0.917633	1476	3	1.1219
RAD18	3	4	0.85264	0.85331	1	16881	1	0.075476	4	0.11397	0.24236	1	4171	3	1.1396	4	0.27596	0.43674	1	7827	2	0.20164	4	0.025011	0.071825	0.917633	1477	3	0.98059
PRR18	6	4	0.091594	0.20339	1	3606	3	1.0456	4	0.15038	0.30256	1	5189	2	0.95814	4	0.55259	0.67965	1	12384	1	-0.035954	4	0.025027	0.071854	0.917633	1478	2	0.70495
TALDO1	11	4	0.06178	0.14969	1	2664	1	-2.5819	4	0.064103	0.15428	1	2731	2	-0.76526	4	0.01566	0.050932	1	964	4	1.1873	4	0.025083	0.071968	0.918508	1480	2	-0.99812
UMODL1	21	4	0.054648	0.13636	1	2434	2	0.72926	4	0.021999	0.069649	1	1242	3	1.4676	4	0.3359	0.49288	1	8993	1	0.33971	4	0.025121	0.07205	0.918731	1481	2	-0.31417
RRP8	11	4	0.63121	0.71556	1	13218	1	0.4888	4	0.11565	0.24523	1	4217	2	0.54856	4	0.72005	0.75876	1	14598	1	0.16588	4	0.025133	0.072077	0.918731	1482	3	0.93941
SLC10A1	14	4	0.021659	0.068651	1	1236	2	0.91636	4	0.27205	0.43539	1	7747	1	-0.61016	4	0.66366	0.72894	1	13757	1	0.122	4	0.025158	0.072138	0.91892	1483	2	0.60699
GPX5	6	4	0.12967	0.26855	1	4614	3	1.1319	4	0.90272	0.90251	1	17995	0	0.45547	4	0.48419	0.63286	1	11394	2	0.46636	4	0.025225	0.072269	0.920006	1484	3	0.83086
AAMP	2	4	0.027441	0.083722	1	1480	3	1.4156	4	0.04251	0.11367	1	1994	2	0.65728	4	0.20806	0.37334	1	6553	2	0.62269	4	0.025281	0.072383	0.920877	1485	2	-0.31573
WTIP	19	4	0.057743	0.14217	1	2539	1	-3.1658	4	0.085003	0.19193	1	3351	2	-1.4006	4	0.00040846	0.0014765	0.390135	74	3	2.1371	4	0.025364	0.072558	0.922523	1486	2	-0.86796
TMEM35	X	4	0.13663	0.28019	1	4795	3	0.8877	4	0.058913	0.14456	1	2544	3	1.0674	4	0.39238	0.54574	1	9941	2	0.42502	4	0.025411	0.072657	0.922553	1487	3	0.84882
ZNHIT1	7	4	0.12252	0.25661	1	4422	2	0.92227	4	0.015771	0.051266	1	949	2	-2.1955	4	0.29995	0.45915	1	8299	1	-1.5837	4	0.025482	0.072792	0.922553	1489	2	-0.91048
SYCP1	1	4	0.2792	0.44115	1	7766	1	0.356	4	0.45325	0.6041	1	10954	1	0.2136	4	0.38041	0.53452	1	9755	2	0.69642	4	0.02551	0.072858	0.922553	1491	3	0.75274
DEFA6	8	4	0.013121	0.043135	0.994405	864	4	1.6069	4	0.13557	0.27849	1	4757	3	1.0045	4	0.25071	0.41302	1	7336	2	0.026125	4	0.025524	0.072885	0.922553	1492	3	0.86657
ADGRF5	6	4	0.044648	0.11747	1	2081	2	0.60191	4	0.18222	0.35245	1	6014	2	0.72164	4	0.31334	0.47176	1	8553	1	0.14902	4	0.025539	0.07291	0.922553	1494	3	1.0549
ANKLE1	19	4	0.49584	0.64399	1	11384	1	-1.0876	4	0.019752	0.063068	1	1133	3	1.711	4	0.036006	0.10017	1	1831	2	1.1078	4	0.02554	0.072911	0.922553	1495	2	-0.54712
C1QTNF9B-AS1	17	4	0.77763	0.79526	1	15467	1	0.071016	4	0.21767	0.38514	1	6709	1	0.61723	4	0.07266	0.16935	1	3073	2	0.86934	4	0.025549	0.072929	0.922553	1496	3	1.0052
RMI2	16	4	0.962	0.96206	1	19150	0	-0.98478	4	0.012012	0.039757	1	762	4	1.3858	4	0.076799	0.17684	1	3193	2	0.8957	4	0.025584	0.073002	0.922553	1497	3	0.67902
TECPR2	14	4	0.34981	0.50687	1	9109	2	0.61236	4	0.092622	0.20541	1	3594	3	1.1884	4	0.95364	0.95371	1	19047	0	0.095532	4	0.025633	0.073099	0.922553	1498	3	0.89177
BLVRB	19	4	0.037316	0.10324	1	1825	2	0.18444	4	0.011002	0.036668	1	697	2	1.3679	4	0.088346	0.19743	1	3488	2	0.059015	4	0.025697	0.073228	0.922553	1499	1	-0.29618
IL10	1	4	0.055804	0.13849	1	2473	2	-1.9354	4	0.020074	0.064026	1	1151	3	1.7375	4	0.3397	0.49644	1	9091	2	-1.8835	4	0.025698	0.073231	0.922553	1500	2	-1.0577
AXDND1	1	4	0.46314	0.61321	1	10849	1	0.22002	4	0.25836	0.42269	1	7458	1	-0.30966	4	0.066137	0.15744	1	2864	3	1.0149	4	0.025736	0.073303	0.922553	1501	2	0.51604
BIRC8	19	4	0.045022	0.11819	1	2089	2	0.82661	4	0.20961	0.37769	1	6558	2	-0.39435	4	0.023113	0.072815	1	1313	3	1.1629	4	0.025749	0.07333	0.922553	1502	2	-0.36489
ZNF416	19	4	0.82507	0.82987	1	16337	1	0.48249	4	0.74538	0.77582	1	15136	1	0.27008	4	0.0059454	0.02056	0.957373	425	4	1.5225	4	0.025752	0.073335	0.922553	1503	3	1.0869
ZNF518B	4	4	0.10775	0.23169	1	4045	3	1.0451	4	0.0066373	0.022804	0.965845	471	2	1.4265	4	0.21437	0.37929	1	6663	2	0.29039	4	0.025765	0.073364	0.922553	1504	3	1.0358
TM6SF1	15	4	0.10129	0.22047	1	3869	2	0.71734	4	0.66859	0.73439	1	13964	1	-0.2443	4	0.26461	0.42609	1	7613	1	0.026579	4	0.025772	0.073377	0.922553	1505	3	0.64932
FBXO21	12	4	0.14536	0.29438	1	5013	2	0.39249	4	0.14713	0.2973	1	5090	3	1.2209	4	0.94361	0.94363	1	18831	0	-0.11063	4	0.025776	0.073386	0.922553	1506	3	0.85378
OSGEPL1	2	4	0.12529	0.26126	1	4494	1	-1.6116	4	0.55298	0.68395	1	12484	1	-4.4492	4	0.01921	0.061488	1	1122	1	-2.161	4	0.025836	0.073516	0.923609	1507	1	-2.421
YEATS4	12	4	0.45778	0.60811	1	10770	2	0.73243	4	0.26804	0.43157	1	7666	2	0.5788	4	0.25966	0.42147	1	7503	2	0.92065	4	0.02587	0.073588	0.923941	1508	3	1.0725
SHISA8	22	4	0.34495	0.50239	1	9003	1	-0.11511	4	0.52057	0.66735	1	12060	2	0.7865	4	0.15532	0.31034	1	5386	2	0.77655	4	0.025895	0.073641	0.924032	1509	3	0.85802
NUDT17	1	4	0.45698	0.60735	1	10760	2	-0.017916	4	0.18986	0.35947	1	6160	2	0.44887	4	0.73143	0.76537	1	14781	1	0.59477	4	0.025937	0.07372	0.924443	1510	2	0.45902
SSC5D	19	4	0.083779	0.18962	1	3351	2	0.97522	4	0.068993	0.1633	1	2882	2	-1.6626	4	0.011284	0.037554	1	733	3	1.5528	4	0.026004	0.07387	0.924676	1511	2	-0.046877
CCL4L2	17	4	0.26419	0.42718	1	7488	1	-1.0262	4	0.0081414	0.027666	0.997259	553	3	2.2329	4	0.021581	0.068436	1	1248	1	-1.3253	4	0.02601	0.073885	0.924676	1512	2	0.31347
NUP153	6	4	0.096278	0.21166	1	3725	2	-1.6872	4	0.046677	0.12161	1	2137	2	1.0872	4	0.065692	0.15663	1	2850	2	0.8862	4	0.026033	0.073932	0.924676	1513	2	-0.13014
CCNE1	19	4	0.044258	0.11671	1	2068	2	0.87445	4	0.05924	0.14519	1	2558	3	1.3995	4	0.32436	0.48212	1	8768	2	-0.0023945	4	0.026061	0.073997	0.924676	1514	2	0.36093
CDKN3	14	4	0.13564	0.27852	1	4766	3	1.1479	4	0.67647	0.73827	1	14073	1	-1.8993	4	0.073278	0.17049	1	3093	3	1.3992	4	0.026071	0.074015	0.924676	1515	2	-0.093108
AURKC	19	4	0.30008	0.46054	1	8168	2	0.60573	4	0.020127	0.064193	1	1154	3	1.5426	4	0.026962	0.082169	1	1484	2	0.81152	4	0.026186	0.074253	0.92676	1517	2	-0.27646
C6orf62	6	4	0.042106	0.11258	1	2002	1	-2.4566	4	0.30755	0.46821	1	8472	1	-0.68507	4	0.0012102	0.0043807	0.616181	143	4	2.3303	4	0.02622	0.074314	0.92676	1518	1	-1.7888
PRR7	5	4	0.28404	0.4456	1	7855	2	-2.447	4	0.76727	0.78915	1	15487	1	-1.8899	4	0.036713	0.10154	1	1855	2	0.89034	4	0.026234	0.074344	0.92676	1519	2	-0.73281
RPH3AL	17	4	0.22342	0.38938	1	6725	1	0.38019	4	0.16265	0.32227	1	5524	3	1.0104	4	0.33847	0.49528	1	9052	2	0.72052	4	0.026254	0.07438	0.92676	1520	3	0.95091
C19orf47	19	4	0.0021372	0.0076295	0.636765	241	2	1.3471	4	0.00079543	0.0028779	0.531065	109	3	1.7907	4	0.050096	0.12725	1	2330	3	0.91495	4	0.026272	0.074412	0.92676	1521	3	0.8092
RPS4Y2	Y	4	0.27243	0.43486	1	7647	2	0.91178	4	0.20435	0.37289	1	6470	2	0.81408	4	0.25363	0.41579	1	7387	2	0.4005	4	0.02631	0.074504	0.927151	1523	3	0.99376
ANAPC2	9	4	0.20494	0.37232	1	6381	1	0.14035	4	0.32421	0.48377	1	8853	2	0.11081	4	0.11731	0.24772	1	4266	2	0.762	4	0.026324	0.074535	0.927151	1524	2	0.12511
SLC17A4	6	4	0.50508	0.6527	1	11535	2	0.56582	4	0.063999	0.15408	1	2727	2	0.59369	4	0.34991	0.50598	1	9299	1	-0.36916	4	0.02636	0.074599	0.927367	1525	3	0.70391
RPGRIP1L	16	4	0.059473	0.14537	1	2590	1	-5.5248	4	0.02789	0.084988	1	1485	2	-1.6704	4	0.23292	0.39647	1	7000	2	-0.75836	4	0.026386	0.074658	0.927528	1526	1	-3.1519
RAB15	14	4	0.8836	0.8833	1	17525	0	-1.6931	4	0.011305	0.037618	1	718	4	1.9118	4	0.00075589	0.0027376	0.51561	105	4	2.3127	4	0.026417	0.074734	0.927897	1527	3	1.0638
HEXIM2	17	4	0.95631	0.95637	1	19036	0	0.038857	4	0.23652	0.40252	1	7069	2	1.0568	4	0.26619	0.42756	1	7642	2	0.73105	4	0.02648	0.074854	0.928177	1528	3	0.96783
OR4C11	11	4	0.25842	0.42183	1	7379	2	0.55333	4	0.14638	0.29612	1	5070	3	0.93351	4	0.94977	0.94978	1	18967	0	-0.39836	4	0.026496	0.074879	0.928177	1529	3	0.79655
OR9K2	12	4	0.32868	0.48734	1	8713	1	-0.22238	4	0.28336	0.4458	1	7974	1	-0.30025	4	0.12662	0.26328	1	4546	2	-0.33331	4	0.026504	0.074895	0.928177	1530	2	-0.73306
TPRA1	3	4	0.3383	0.49616	1	8891	2	0.78761	4	0.7603	0.78483	1	15386	1	0.69933	4	0.010379	0.034739	1	685	2	0.57375	4	0.026551	0.075001	0.928673	1531	3	1.1114
KCNE3	11	4	0.081547	0.18573	1	3292	3	1.1698	4	0.60212	0.704	1	13091	1	-0.84956	4	0.020583	0.065536	1	1194	2	0.69852	4	0.026561	0.075027	0.928673	1532	2	0.66196
C15orf32	15	4	0.10322	0.22376	1	3923	3	1.2744	4	0.025061	0.078401	1	1375	2	-2.4127	4	0.92215	0.92203	1	18408	0	-0.74999	4	0.026619	0.07514	0.929497	1533	2	-1.4185
CYP4F11	19	4	0.21978	0.38605	1	6655	2	0.18318	4	0.33661	0.49524	1	9113	1	0.18197	4	0.41662	0.56879	1	10318	1	0.36414	4	0.026668	0.075229	0.930033	1534	2	0.53372
CATSPERG	19	4	0.22066	0.38684	1	6674	1	0.19899	4	0.010379	0.034741	1	669	4	1.6903	4	0.03491	0.097993	1	1787	3	1.2767	4	0.026716	0.075345	0.930885	1536	3	1.4074
EFCAB2	1	4	0.065461	0.15658	1	2787	3	1.35	4	0.06424	0.15454	1	2738	2	-0.2006	4	0.043718	0.11521	1	2107	3	1.0865	4	0.026774	0.07547	0.931443	1537	3	1.1225
CXorf66	X	4	0.42846	0.58059	1	10314	1	-2.0171	4	0.11772	0.24874	1	4269	2	-1.5953	4	0.19637	0.36252	1	6321	2	0.62571	4	0.026788	0.075496	0.931443	1538	2	-1.4293
RPUSD3	3	4	0.19044	0.35886	1	6094	2	0.95866	4	0.12155	0.25511	1	4374	2	0.77393	4	0.84227	0.84379	1	16773	0	-1.2513	4	0.026803	0.075529	0.931443	1539	2	0.52662
RCBTB1	13	4	0.11594	0.24562	1	4247	3	1.0461	4	0.27712	0.44009	1	7850	2	0.69939	4	0.26079	0.42251	1	7530	1	-3.1523	4	0.026842	0.075611	0.931885	1540	2	-0.66089
FBXL21	5	4	0.01019	0.034157	0.922194	739	1	-3.2219	4	0.55217	0.68364	1	12470	1	-0.3643	4	0.093045	0.20569	1	3622	2	0.97911	4	0.026897	0.075732	0.932299	1541	1	-0.90629
TRIM49D2	11	4	0.61945	0.71027	1	13055	1	0.40502	4	0.10728	0.23099	1	3992	2	0.73242	4	0.13131	0.27114	1	4678	3	0.86971	4	0.0269	0.075742	0.932299	1542	3	0.99897
OPRD1	1	4	0.92469	0.9246	1	18366	0	0.20295	4	0.0088782	0.030083	1	595	3	1.5429	4	0.018919	0.060594	1	1103	4	1.2302	4	0.026926	0.075794	0.932299	1543	3	1.1549
KIAA1671	22	4	0.097098	0.21313	1	3743	2	0.76169	4	0.01642	0.053232	1	980	2	0.19392	4	0.112	0.23873	1	4132	1	-0.14026	4	0.026951	0.075843	0.932299	1544	2	0.27503
LPIN1	2	4	0.28965	0.45079	1	7987	2	0.24524	4	0.11321	0.24108	1	4142	2	1.2947	4	0.1393	0.28444	1	4892	2	0.6629	4	0.026969	0.075876	0.932299	1545	3	0.90482
CTCFL	20	4	0.79028	0.80391	1	15688	1	0.23993	4	0.35334	0.51071	1	9453	2	0.94473	4	0.75625	0.78042	1	15177	1	0.143	4	0.027053	0.076069	0.933455	1546	3	0.90056
EMC3	3	4	0.010221	0.034252	0.923506	740	3	1.7018	4	0.0031511	0.011113	0.827888	265	2	-1.8252	4	0.053279	0.13331	1	2458	3	1.0435	4	0.027056	0.076074	0.933455	1547	1	-1.6021
TMEM123	11	4	0.17675	0.34436	1	5802	3	1.0604	4	0.41138	0.56489	1	10285	1	-0.82536	4	0.011356	0.037784	1	738	3	1.2092	4	0.027074	0.076109	0.933455	1548	3	0.84251
ELAC2	17	4	0.060776	0.14776	1	2633	2	0.78001	4	0.61091	0.70774	1	13190	1	0.40138	4	0.15631	0.31193	1	5417	3	0.86414	4	0.02714	0.076251	0.934053	1549	3	0.86771
MAGEA1	X	4	0.11512	0.24421	1	4227	3	1.3418	4	0.74184	0.77371	1	15078	1	0.079963	4	0.047259	0.12194	1	2222	3	0.98385	4	0.027145	0.076266	0.934053	1550	3	1.2445
RUVBL2	19	4	0.51709	0.66407	1	11724	1	-0.28787	4	0.012818	0.042202	1	805	2	-2.2417	4	0.0016085	0.00576	0.639131	179	3	2.1465	4	0.02716	0.076298	0.934053	1551	2	-0.71463
SIGLEC6	19	4	0.17814	0.34658	1	5845	3	1.0102	4	0.31674	0.47679	1	8679	1	-1.6339	4	0.012149	0.040152	1	789	3	1.8099	4	0.027222	0.076445	0.935285	1552	2	0.8727
WDR11	10	4	0.12183	0.25547	1	4404	2	1.2647	4	0.28166	0.44425	1	7940	2	0.97265	4	0.020161	0.064284	1	1171	3	1.3623	4	0.02729	0.076585	0.936279	1553	3	1.2952
SNX13	7	4	0.59367	0.69904	1	12701	1	0.36592	4	0.4628	0.61308	1	11120	2	0.69599	4	0.90702	0.90688	1	18085	0	-0.16656	4	0.02733	0.07666	0.936279	1554	3	0.79672
SMARCE1	17	4	0.020217	0.064442	1	1165	4	1.0835	4	0.1464	0.29615	1	5072	3	1.1678	4	0.82572	0.82982	1	16453	1	-0.90971	4	0.027359	0.07673	0.936279	1555	3	0.74679
ECM2	9	4	0.093248	0.20633	1	3647	3	1.1985	4	0.21474	0.38248	1	6657	2	1.0272	4	0.24699	0.40955	1	7260	1	0.252	4	0.027378	0.076774	0.936279	1556	3	0.77481
ATP4A	7	4	0.88912	0.88877	1	17630	0	0.076309	4	0.041452	0.11161	1	1957	3	1.4084	4	0.087873	0.19655	1	3476	2	0.44985	4	0.027398	0.076806	0.936279	1557	3	0.97674
MECR	1	4	0.084792	0.19136	1	3382	3	1.282	4	0.085766	0.19328	1	3375	3	1.3167	4	0.9653	0.96536	1	19288	0	0.058547	4	0.027412	0.076835	0.936279	1558	3	0.9936
INPP5K	17	4	0.022421	0.070817	1	1274	3	1.5472	4	0.85897	0.85929	1	17128	1	-0.36768	4	0.3522	0.50805	1	9337	1	-0.93181	4	0.027422	0.076852	0.936279	1559	2	0.27598
EFCAB7	1	4	0.31044	0.47023	1	8361	2	0.6418	4	0.016171	0.052488	1	968	4	1.0953	4	0.072107	0.16834	1	3056	2	0.9883	4	0.027469	0.076947	0.936665	1560	3	1.14
DHX36	3	4	0.40582	0.55923	1	9963	2	0.59683	4	0.3366	0.49523	1	9112	2	0.63159	4	0.28854	0.44836	1	8076	2	0.62291	4	0.0275	0.077013	0.936665	1561	3	0.95938
COL22A1	8	4	0.44011	0.5915	1	10500	1	0.25194	4	0.36588	0.52234	1	9612	1	-0.6203	4	0.41738	0.56952	1	10331	1	-0.099647	4	0.027528	0.077074	0.936665	1562	3	0.43133
FBF1	17	4	0.0007422	0.0026904	0.473875	113	2	0.85195	4	0.31237	0.47275	1	8570	1	0.41313	4	0.20471	0.37026	1	6479	1	0.074426	4	0.027555	0.077143	0.936665	1563	3	0.84478
EID1	15	4	0.0034646	0.012173	0.740794	329	4	1.4912	4	0.28472	0.44702	1	7996	2	-0.70803	4	0.057497	0.14124	1	2600	2	-1.9137	4	0.027624	0.077289	0.937229	1564	2	-1.0064
ZNF805	19	4	0.11142	0.23797	1	4130	2	-0.20373	4	0.14127	0.28782	1	4932	2	0.93298	4	0.12054	0.25312	1	4364	3	0.85599	4	0.02763	0.077308	0.937229	1565	2	-0.51518
SLC43A2	17	4	0.052849	0.1329	1	2379	2	-2.7758	4	0.712	0.75676	1	14589	1	-0.79004	4	0.1635	0.32351	1	5596	1	-2.8534	4	0.027673	0.077386	0.937229	1567	2	-1.8602
PRR22	19	4	0.56678	0.68793	1	12349	1	-0.60877	4	0.42302	0.57578	1	10462	2	0.60085	4	0.50042	0.64818	1	11661	1	0.41	4	0.027712	0.077478	0.937229	1568	2	-0.25737
AHDC1	1	4	0.026784	0.082364	1	1455	3	1.4798	4	0.41034	0.56391	1	10272	1	0.64793	4	0.054353	0.13538	1	2504	2	-2.0404	4	0.027722	0.077494	0.937229	1569	2	-0.0089514
LMAN2	5	4	0.10792	0.23195	1	4049	2	-2.2174	4	0.0018566	0.0066401	0.677193	194	3	2.1942	4	0.077973	0.17895	1	3224	2	-0.43709	4	0.027735	0.077524	0.937229	1570	1	-2.1505
HS3ST6	16	4	0.14391	0.29204	1	4966	3	0.83475	4	0.898	0.89781	1	17901	0	0.44996	4	0.1257	0.26173	1	4521	2	0.74311	4	0.027742	0.077536	0.937229	1571	3	0.85473
IZUMO1R	11	4	0.21881	0.38515	1	6637	2	0.60299	4	0.82647	0.83129	1	16539	1	-0.82463	4	0.078747	0.18036	1	3252	2	0.92606	4	0.027774	0.077607	0.937358	1572	3	0.81339
DYSF	2	4	0.34269	0.50029	1	8964	2	0.53679	4	0.39336	0.54787	1	10018	1	0.64791	4	0.16687	0.32883	1	5677	2	0.96857	4	0.027789	0.077639	0.937358	1573	3	0.8027
CCDC28A	6	4	0.0091321	0.030869	0.913082	676	2	1.1608	4	0.077674	0.17897	1	3139	2	1.1234	4	0.84222	0.84375	1	16772	0	-0.74163	4	0.027839	0.07775	0.938132	1575	2	-0.94776
FAM162A	3	4	0.28306	0.44469	1	7835	2	0.6116	4	0.51016	0.65749	1	11902	1	-1.8916	4	0.38539	0.53918	1	9835	2	0.49655	4	0.027929	0.077943	0.938662	1577	2	-0.29103
CCDC157	22	4	0.14332	0.29108	1	4950	2	0.95574	4	0.16777	0.33032	1	5656	1	-2.4983	4	0.13744	0.28138	1	4853	1	0.53553	4	0.027944	0.077971	0.938662	1578	2	-0.13844
RNF113A	X	4	0.2495	0.41346	1	7224	2	0.036441	4	0.11343	0.24142	1	4149	3	1.1436	4	0.072581	0.1692	1	3070	3	1.0899	4	0.027971	0.078031	0.938662	1579	3	1.2551
TMED1	19	4	0.1185	0.24995	1	4313	3	0.89249	4	0.7772	0.79555	1	15658	1	0.20603	4	0.073033	0.17002	1	3087	3	0.96283	4	0.027982	0.078056	0.938662	1580	3	0.96831
HNRNPH3	10	4	0.84508	0.84658	1	16715	0	-0.0086571	4	0.15391	0.30816	1	5283	3	0.93711	4	0.39225	0.54561	1	9940	2	0.53966	4	0.027992	0.078074	0.938662	1581	3	0.97031
RASSF4	10	4	0.11707	0.24754	1	4275	2	0.99582	4	0.082909	0.18827	1	3290	2	1.2115	4	0.4714	0.62075	1	11199	2	0.50825	4	0.028044	0.078189	0.939479	1582	3	1.029
KIR3DL3	19	4	0.058277	0.14314	1	2555	3	1.5354	4	0.010221	0.034255	1	662	3	1.7563	4	0.12666	0.26336	1	4547	1	-0.82044	4	0.028149	0.078387	0.940816	1583	3	1.3784
CDK11B	1	4	0.15511	0.31007	1	5266	3	1.2575	4	0.081633	0.18607	1	3257	2	-2.3068	4	0.14652	0.29618	1	5098	2	-0.65466	4	0.028153	0.078394	0.940816	1584	2	-0.69696
ZNF397	18	4	0.0089372	0.030259	0.907662	664	1	-3.1348	4	0.54675	0.68156	1	12407	1	-0.60258	4	0.0040023	0.014027	0.84983	328	2	-1.3507	4	0.028232	0.078532	0.94192	1585	1	-2.6665
CRHR2	7	4	0.30196	0.4623	1	8209	1	-0.049028	4	0.079386	0.18206	1	3189	2	-2.2694	4	0.6856	0.74004	1	14062	1	-2.385	4	0.028296	0.078666	0.942962	1586	2	-1.6508
PROM2	2	4	0.11723	0.2478	1	4280	1	-0.23799	4	0.22962	0.39607	1	6943	1	-0.52813	4	0.11677	0.24681	1	4249	2	0.92807	4	0.028317	0.078713	0.942962	1587	2	0.75926
CFAP57	1	4	0.11603	0.24575	1	4249	1	-0.22217	4	0.30107	0.46222	1	8356	2	0.7898	4	0.79738	0.80805	1	15933	0	-0.19019	4	0.028346	0.078774	0.943125	1588	3	0.45582
TFAP2B	6	4	0.16212	0.3214	1	5446	2	0.76331	4	0.5038	0.65156	1	11797	1	0.7242	4	0.01098	0.036603	1	719	4	1.0248	4	0.028385	0.078856	0.943528	1589	3	1.1135
HPCAL4	1	4	0.14344	0.29125	1	4955	3	1.0009	4	0.5116	0.65886	1	11926	2	0.72468	4	0.15314	0.30682	1	5318	2	0.38133	4	0.028406	0.078901	0.943528	1590	3	0.91738
PMPCA	9	4	0.76372	0.78628	1	15210	1	0.58708	4	0.52417	0.6708	1	12126	2	0.84941	4	0.33914	0.49589	1	9076	2	0.78692	4	0.028527	0.079145	0.944423	1591	3	1.033
TIAL1	10	4	0.14478	0.29347	1	4998	1	-0.11761	4	0.22701	0.39372	1	6884	2	0.60068	4	0.030291	0.088859	1	1611	3	1.4096	4	0.028535	0.07916	0.944423	1592	3	1.0201
TOP3B	22	4	0.43998	0.59137	1	10498	1	0.52189	4	0.015195	0.049483	1	914	4	1.3706	4	0.31851	0.47657	1	8649	1	0.022774	4	0.028585	0.079264	0.944423	1593	3	1.1113
MMP2	16	4	0.62126	0.71108	1	13092	1	-1.6356	4	0.057113	0.14119	1	2480	3	1.7398	4	0.051329	0.12959	1	2382	2	0.70023	4	0.028605	0.079303	0.944423	1594	2	0.20669
ZNF584	19	4	0.017826	0.057429	1	1070	3	1.4956	4	0.086098	0.1939	1	3393	2	-1.7611	4	0.031865	0.091957	1	1667	3	1.5898	4	0.028622	0.079341	0.944423	1595	2	0.36357
KCNQ4	1	4	0.62749	0.71391	1	13172	1	0.48879	4	0.11507	0.24424	1	4198	3	1.022	4	0.28536	0.44543	1	8016	1	0.53281	4	0.028625	0.079346	0.944423	1596	2	0.44609
PLN	6	4	0.9505	0.95052	1	18900	0	0.22804	4	0.25712	0.42157	1	7440	2	0.74196	4	0.4605	0.61031	1	11023	2	0.45714	4	0.028643	0.079389	0.944423	1598	3	0.76948
DND1	5	4	0.058367	0.1433	1	2559	3	1.3777	4	0.44514	0.59645	1	10824	1	-0.4119	4	0.23493	0.39841	1	7042	2	-0.23022	4	0.028655	0.079416	0.944423	1599	2	-0.53373
ZNF627	19	4	0.42878	0.5809	1	10319	1	0.59179	4	0.90226	0.90204	1	17987	0	-0.35581	4	0.39698	0.55016	1	10005	2	0.33631	4	0.028706	0.079536	0.944423	1600	3	0.67531
LACTB2	8	4	0.023064	0.072671	1	1311	4	1.5246	4	0.0025552	0.0090787	0.77315	231	2	-1.5026	4	0.12197	0.25553	1	4412	3	1.0421	4	0.028765	0.07966	0.944423	1601	2	0.025531
C9orf41	9	4	0.14764	0.29809	1	5062	1	-2.8087	4	0.022059	0.069816	1	1244	1	-1.036	4	0.080239	0.18305	1	3291	1	-2.8564	4	0.028779	0.079687	0.944423	1602	1	-3.2605
SLC25A6	X	4	0.77991	0.79681	1	15511	1	0.31826	4	0.065973	0.15776	1	2791	3	1.3797	4	0.47396	0.6232	1	11235	1	-0.13684	4	0.028796	0.079724	0.944423	1604	3	0.84438
GRM2	3	4	0.81846	0.82465	1	16215	1	0.48101	4	0.18402	0.35412	1	6050	2	1.1578	4	0.80448	0.81328	1	16045	0	0.30584	4	0.028802	0.079733	0.944423	1605	3	0.98249
RAD23A	19	4	0.14014	0.28595	1	4898	2	1.0361	4	0.28387	0.44628	1	7987	2	0.89316	4	0.17356	0.33938	1	5846	3	0.81307	4	0.028823	0.079778	0.944423	1606	3	0.78424
CEACAM5	19	4	0.12055	0.25333	1	4366	3	0.99753	4	0.030921	0.090985	1	1581	3	1.2064	4	0.15945	0.31698	1	5504	1	-1.6775	4	0.028908	0.07996	0.944423	1607	3	0.79452
IFNGR1	6	4	0.33155	0.48999	1	8763	1	-2.3585	4	0.0033078	0.011652	0.855334	269	4	2.2077	4	0.22505	0.38914	1	6865	2	0.0065309	4	0.028936	0.080022	0.944423	1608	2	0.054347
ATP5D	5	4	0.22265	0.38866	1	6709	2	0.54877	4	0.46258	0.61288	1	11118	1	-0.58254	4	0.058918	0.1439	1	2644	3	1.0648	4	0.028955	0.080056	0.944423	1609	2	0.18293
HADHA	2	4	0.1493	0.30077	1	5111	3	0.94567	4	0.083655	0.18959	1	3316	2	1.0314	4	0.24221	0.40514	1	7171	2	0.40069	4	0.028961	0.080069	0.944423	1610	3	0.98587
CYB5A	18	4	0.094	0.20765	1	3666	2	0.75838	4	0.099797	0.21801	1	3772	3	1.1877	4	0.78126	0.79668	1	15621	1	-0.28136	4	0.028995	0.080136	0.944423	1611	2	-0.60145
PDGFRL	8	4	0.0060939	0.021055	0.842893	500	3	1.5569	4	0.054099	0.13561	1	2380	3	1.1384	4	0.66913	0.73165	1	13835	0	-3.7216	4	0.029005	0.080157	0.944423	1612	2	-1.7537
SOX21	13	4	0.028866	0.086604	1	1523	3	1.5106	4	0.52082	0.6676	1	12063	2	0.60279	4	0.098468	0.21527	1	3778	2	0.39722	4	0.029015	0.080174	0.944423	1613	3	0.93907
SSX2IP	1	4	0.040711	0.10988	1	1960	2	1.0949	4	0.072346	0.16937	1	2976	1	-2.9977	4	0.0036372	0.012773	0.84983	299	3	1.6805	4	0.02904	0.080213	0.944423	1614	1	-1.0352
PAK2	3	4	0.77513	0.79361	1	15418	1	-1.0034	4	0.13256	0.27345	1	4675	2	0.85093	4	0.67471	0.73445	1	13914	1	0.28705	4	0.029054	0.080246	0.944423	1615	3	0.71636
PPP6R1	19	4	0.0077808	0.026515	0.879649	601	3	2.1375	4	0.30765	0.4683	1	8477	2	0.50546	4	0.037132	0.10234	1	1873	2	-1.4267	4	0.029092	0.080336	0.944423	1616	1	-0.62592
DPF2	11	4	0.08526	0.19219	1	3397	3	1.1933	4	0.87201	0.8717	1	17393	1	0.17984	4	0.023217	0.07313	1	1323	3	1.2547	4	0.029096	0.080343	0.944423	1617	3	0.78572
SIRT6	19	4	0.75986	0.78391	1	15143	1	0.31641	4	0.35901	0.51602	1	9532	2	0.86945	4	0.95452	0.95458	1	19073	0	0.081992	4	0.029105	0.08036	0.944423	1618	3	0.78075
CLCN1	7	4	0.012752	0.042	0.987921	847	4	1.4248	4	0.22285	0.38987	1	6819	2	0.73454	4	0.45827	0.6082	1	10980	1	-1.1453	4	0.029106	0.08036	0.944423	1619	2	0.7063
ADAM21	14	4	0.12935	0.26802	1	4609	3	0.98818	4	0.051983	0.13154	1	2310	3	0.98156	4	0.16425	0.32467	1	5620	3	0.95711	4	0.029136	0.080425	0.944423	1620	3	1.0487
KCNH3	12	4	0.46592	0.61587	1	10884	1	-0.66236	4	0.143	0.29063	1	4986	2	1.2144	4	0.065079	0.15548	1	2827	2	0.39839	4	0.029166	0.080494	0.944423	1621	2	0.78863
TSSC1	2	4	0.035146	0.098972	1	1763	2	0.71399	4	0.075662	0.17537	1	3069	2	0.40337	4	0.16889	0.33204	1	5726	1	-1.443	4	0.029196	0.080557	0.944423	1622	2	-1.2625
NUCB2	11	4	0.082803	0.1879	1	3326	2	-0.27229	4	0.27517	0.43829	1	7807	2	0.94799	4	0.139	0.28395	1	4884	3	0.9641	4	0.029249	0.08066	0.944423	1623	2	0.54954
FAM19A3	1	4	0.065223	0.15616	1	2777	2	0.24442	4	0.85196	0.85285	1	17004	0	0.31332	4	0.10535	0.22727	1	3958	1	-2.4961	4	0.029265	0.080689	0.944423	1624	2	-0.11224
ZSCAN32	16	4	0.091542	0.2033	1	3599	2	0.48509	4	0.79798	0.80985	1	16023	0	-2.7165	4	0.14766	0.29802	1	5133	2	0.77501	4	0.029287	0.080729	0.944423	1625	2	-1.5107
HDHD2	18	4	0.02085	0.06629	1	1197	3	1.4888	4	0.14783	0.29844	1	5121	2	0.85338	4	0.066102	0.15737	1	2862	1	-0.038353	4	0.029353	0.080862	0.944423	1626	2	-0.71434
DPEP2	16	4	0.29605	0.45667	1	8091	2	0.17754	4	0.36074	0.51757	1	9556	2	0.17211	4	0.17206	0.33702	1	5809	3	0.72799	4	0.029357	0.080869	0.944423	1627	3	0.70794
TRIP12	2	4	0.10495	0.22679	1	3971	2	0.68989	4	0.89764	0.89744	1	17891	0	0.47557	4	0.071375	0.16702	1	3037	3	1.0497	4	0.029389	0.080931	0.944423	1628	3	0.7321
KANK3	19	4	0.01123	0.037382	0.948179	786	2	0.88311	4	0.26914	0.43259	1	7693	2	0.62138	4	0.82983	0.83322	1	16545	1	0.10557	4	0.029427	0.081006	0.944423	1629	3	0.98531
CACNG7	19	4	0.0050473	0.017547	0.818766	428	3	1.8887	4	0.12813	0.26605	1	4560	1	0.49146	4	0.097178	0.213	1	3736	2	0.875	4	0.029449	0.081049	0.944423	1630	3	1.2593
PNPO	17	4	0.3381	0.49596	1	8886	2	0.81557	4	0.16653	0.32838	1	5625	2	1.1397	4	0.6026	0.70051	1	12930	1	0.30731	4	0.029459	0.081067	0.944423	1631	3	0.87229
EMC4	15	4	0.038002	0.10458	1	1852	3	1.1897	4	0.83407	0.83749	1	16682	0	0.5338	4	0.51437	0.6614	1	11888	1	-2.4704	4	0.029478	0.081104	0.944423	1632	2	0.043591
GBX1	7	4	0.021992	0.069622	1	1250	1	0.33171	4	0.40828	0.56195	1	10239	1	0.40119	4	0.32452	0.48228	1	8772	2	0.71709	4	0.029513	0.081163	0.944423	1633	3	1.0295
GOLGA8K	15	4	0.25633	0.41991	1	7345	1	0.10372	4	0.35154	0.50902	1	9425	1	0.22306	4	0.0063443	0.021838	0.971903	445	4	1.2399	4	0.029529	0.081201	0.944423	1634	3	1.0134
LSM12	17	4	0.086488	0.19439	1	3439	2	1.0936	4	0.1682	0.33101	1	5671	2	-0.18191	4	0.28104	0.44149	1	7937	2	0.77343	4	0.029545	0.081235	0.944423	1635	3	0.757
SPRY1	4	4	0.087676	0.19652	1	3478	2	0.31102	4	0.67395	0.73702	1	14040	1	0.54972	4	0.77328	0.79131	1	15484	1	-0.90785	4	0.029567	0.081277	0.944423	1636	2	0.31358
MAGIX	X	4	0.22211	0.38816	1	6698	2	0.59354	4	0.19465	0.36397	1	6270	2	-1.1987	4	0.15556	0.3107	1	5394	2	-2.5266	4	0.029621	0.081383	0.944602	1637	2	-0.74385
MPV17L	16	4	0.82797	0.83222	1	16388	1	0.44181	4	0.089377	0.19967	1	3490	2	1.0361	4	0.69573	0.74544	1	14216	1	0.34088	4	0.029642	0.081428	0.944602	1638	3	0.93875
ARHGAP26	5	4	0.17523	0.34202	1	5762	1	0.19206	4	0.085543	0.19287	1	3362	2	-1.7561	4	0.87326	0.87295	1	17379	0	-0.38157	4	0.029682	0.081513	0.944602	1639	2	-0.27447
KCTD15	19	4	0.40005	0.55384	1	9873	1	-0.14199	4	0.096009	0.21137	1	3679	2	0.90495	4	0.0039365	0.0138	0.84983	318	3	1.6343	4	0.029692	0.081532	0.944602	1640	2	0.70693
ASCL4	12	4	0.0082469	0.028035	0.904272	620	4	1.566	4	0.17342	0.33918	1	5778	1	0.11284	4	0.055816	0.13807	1	2555	2	0.47856	4	0.029702	0.081553	0.944602	1641	3	1.138
SPINT2	19	4	0.0010441	0.0037812	0.531849	143	4	2.0218	4	0.021123	0.067078	1	1196	1	-1.6436	4	0.010752	0.03593	1	709	3	1.9053	4	0.029718	0.081593	0.944602	1642	3	0.95715
RNF152	18	4	0.81783	0.82415	1	16203	1	0.56966	4	0.06321	0.15256	1	2701	2	0.82633	4	0.81217	0.81911	1	16202	1	-0.26152	4	0.029733	0.081621	0.944602	1644	3	0.75698
ALPP	2	4	0.010477	0.035048	0.935689	746	3	1.4662	4	0.27244	0.43573	1	7755	2	1	4	0.26776	0.42897	1	7671	2	0.64097	4	0.02981	0.081776	0.945852	1645	3	0.99979
GJA4	1	4	0.19242	0.36072	1	6141	2	0.65333	4	0.65471	0.72774	1	13779	1	0.36623	4	0.34723	0.50353	1	9249	2	0.40365	4	0.029859	0.081882	0.946532	1647	3	1.0175
CFAP99	4	4	0.44906	0.59986	1	10631	2	0.79702	4	0.3994	0.55364	1	10110	2	0.84261	4	0.25164	0.4139	1	7351	1	0.32877	4	0.029907	0.081987	0.946705	1648	3	0.92661
IRAK2	3	4	0.39412	0.54814	1	9780	2	0.81433	4	0.29465	0.45615	1	8210	2	0.34909	4	0.13005	0.26902	1	4639	2	0.58615	4	0.030028	0.082224	0.946705	1649	2	0.72014
CCT7	2	4	0.37008	0.52568	1	9424	2	0.64018	4	0.40624	0.56004	1	10213	2	0.60175	4	0.021621	0.068535	1	1249	3	1.327	4	0.030038	0.082246	0.946705	1650	2	0.50921
H3F3B	17	4	0.037354	0.10332	1	1827	3	1.3573	4	0.82418	0.82949	1	16491	1	0.69902	4	0.33362	0.49081	1	8932	2	0.747	4	0.030076	0.082317	0.946705	1651	3	1.2592
RASAL3	19	4	0.42167	0.57417	1	10215	1	-0.74807	4	0.10333	0.22407	1	3876	1	-2.8228	4	0.017966	0.05784	1	1067	4	1.012	4	0.030083	0.082331	0.946705	1652	1	-0.55845
TMEM223	11	4	0.54935	0.68107	1	12136	1	0.50986	4	0.37433	0.53016	1	9723	2	0.41022	4	0.35259	0.50843	1	9341	2	0.60802	4	0.03012	0.082418	0.946705	1654	3	1.0003
TMEM135	11	4	0.17453	0.34095	1	5745	2	0.60727	4	0.77096	0.7915	1	15543	1	0.44785	4	0.02674	0.081711	1	1469	2	-1.9759	4	0.030138	0.082461	0.946705	1655	2	-0.55524
SPATA31A6	9	4	0.018368	0.059009	1	1093	2	1.094	4	0.19556	0.36479	1	6286	1	-2.7326	4	0.052406	0.13161	1	2430	2	1.1825	4	0.03014	0.082465	0.946705	1656	2	-0.11593
MANBA	4	4	0.015638	0.050867	1	969	3	1.2505	4	0.41468	0.56795	1	10335	1	-0.99709	4	0.83877	0.84069	1	16705	0	-0.7222	4	0.030145	0.082474	0.946705	1657	2	0.25306
ACTL8	1	4	0.90969	0.90953	1	18062	0	0.16627	4	0.076965	0.1777	1	3115	3	1.1682	4	0.024207	0.075991	1	1368	2	0.80081	4	0.03015	0.082485	0.946705	1658	3	0.99023
LRRC17	7	4	0.20434	0.37177	1	6368	2	0.88818	4	0.46844	0.61844	1	11198	2	0.38175	4	0.15757	0.31399	1	5450	3	0.77585	4	0.030163	0.082508	0.946705	1659	3	0.98356
TCEAL6	X	4	0.031116	0.091051	1	1614	3	1.3562	4	0.34571	0.5037	1	9300	2	0.42498	4	0.47998	0.62891	1	11331	1	-0.57059	4	0.030184	0.082547	0.946705	1660	3	0.77863
UNC13B	9	4	0.26677	0.42957	1	7534	1	0.32723	4	0.2798	0.44257	1	7897	1	0.067362	4	0.0039478	0.013839	0.84983	322	2	0.86529	4	0.030187	0.082555	0.946705	1661	1	-0.892
GRM8	7	4	0.047309	0.1225	1	2178	3	1.1841	4	0.74874	0.77786	1	15195	1	-0.63139	4	0.31258	0.47103	1	8533	1	0.44438	4	0.030278	0.082733	0.947316	1662	3	0.89644
SOX15	17	4	0.01406	0.046017	1	913	3	1.7617	4	0.30419	0.46511	1	8410	1	-1.4257	4	0.64326	0.7191	1	13486	1	-0.14505	4	0.030302	0.082787	0.947316	1663	2	-0.31623
NPPA	1	4	0.45461	0.60513	1	10725	2	0.28124	4	0.14703	0.29715	1	5085	3	1.0616	4	0.42296	0.57483	1	10421	2	0.49579	4	0.030305	0.082797	0.947316	1664	3	0.93136
TMEM27	X	4	0.2958	0.45643	1	8085	2	0.3867	4	0.18072	0.35056	1	5972	3	0.94006	4	0.099913	0.21778	1	3809	3	1.0101	4	0.030345	0.082886	0.947796	1665	3	0.87197
TMUB2	17	4	0.36987	0.5255	1	9419	2	0.81085	4	0.50878	0.65622	1	11871	2	0.64073	4	0.42251	0.57439	1	10414	2	0.36601	4	0.030365	0.082935	0.947814	1666	3	0.97945
PPP2R5A	1	4	0.28569	0.4471	1	7893	2	0.3059	4	0.19703	0.36614	1	6324	2	0.67301	4	0.18204	0.34912	1	6037	1	-0.012992	4	0.0305	0.083193	0.949643	1667	2	-0.92453
CENPW	6	4	0.14977	0.30153	1	5126	2	0.68848	4	0.2228	0.38983	1	6818	2	-1.2641	4	0.036437	0.10102	1	1848	3	0.79468	4	0.030526	0.083245	0.949643	1668	2	0.44462
ECI1	16	4	0.39042	0.54466	1	9725	1	-2.4831	4	0.0048904	0.017044	0.936658	361	2	-1.6811	4	0.64301	0.719	1	13482	1	-0.31296	4	0.030571	0.083325	0.949643	1669	2	-2.0412
POLR2I	19	4	0.0015985	0.0057265	0.572517	201	2	0.57457	4	0.039616	0.10804	1	1890	1	-4.7273	4	0.038064	0.10421	1	1902	2	0.91365	4	0.030604	0.083391	0.949643	1670	1	-2.1255
CATSPER3	5	4	0.12259	0.25674	1	4424	3	1.1019	4	0.38664	0.54159	1	9911	2	0.77295	4	0.28218	0.44252	1	7962	2	0.15342	4	0.030643	0.083475	0.949643	1672	2	0.38744
B3GNT7	2	4	0.39701	0.5509	1	9835	1	0.061808	4	0.61786	0.71082	1	13275	1	0.47882	4	0.15214	0.30522	1	5277	2	0.48292	4	0.030656	0.083502	0.949643	1673	3	0.62333
TAOK2	16	4	0.26913	0.43171	1	7582	2	0.56587	4	0.082848	0.18816	1	3288	3	1.4222	4	0.46345	0.61318	1	11075	1	0.3017	4	0.030668	0.083527	0.949643	1674	3	1.1407
TGIF2-C20orf24	20	4	0.4136	0.56654	1	10076	2	0.73407	4	0.49336	0.64176	1	11610	2	0.31367	4	0.45488	0.60502	1	10925	2	0.36721	4	0.030674	0.083542	0.949643	1675	3	0.8972
PRPF8	17	4	0.023058	0.072647	1	1310	1	-2.6493	4	0.015725	0.051133	1	946	2	1.5576	4	0.0067138	0.02304	0.97617	466	3	1.7588	4	0.030708	0.083621	0.949643	1676	1	-2.0081
COL18A1	21	4	0.38619	0.54071	1	9655	2	0.87352	4	0.59773	0.70215	1	13028	1	-0.025763	4	0.07507	0.17372	1	3141	1	0.037959	4	0.030718	0.083635	0.949643	1677	3	0.78791
CALR	19	4	0.4527	0.60332	1	10694	2	0.75537	4	0.69859	0.74963	1	14396	1	0.48638	4	0.58609	0.69337	1	12744	1	-0.20316	4	0.030751	0.083698	0.949643	1678	3	0.87995
TMEM119	12	4	0.92795	0.92787	1	18440	0	0.3744	4	0.00085905	0.0031014	0.54639	114	2	-1.3159	4	0.24375	0.40656	1	7200	1	-1.8463	4	0.030756	0.083709	0.949643	1679	2	-0.69085
VASP	19	4	0.020594	0.065574	1	1179	2	-1.0125	4	0.019379	0.061992	1	1108	4	1.5263	4	0.83291	0.83582	1	16603	1	-0.31997	4	0.030812	0.083823	0.950409	1680	2	-0.047739
MCFD2	2	4	0.93301	0.93296	1	18543	0	-0.54052	4	0.44742	0.59858	1	10863	2	0.70614	4	0.42727	0.5789	1	10489	1	0.27292	4	0.030961	0.084156	0.95251	1682	3	0.7175
SPIC	12	4	0.49372	0.64197	1	11349	1	0.36982	4	0.9385	0.93851	1	18704	0	-0.24454	4	0.031318	0.090907	1	1645	3	1.0532	4	0.030978	0.084187	0.95251	1683	3	0.96478
PRELP	1	4	0.03826	0.10511	1	1859	2	0.87743	4	0.66636	0.73329	1	13934	1	0.61184	4	0.17972	0.347	1	5977	2	0.89967	4	0.031014	0.084257	0.95251	1684	2	0.71084
TPRX1	19	4	0.15987	0.31774	1	5394	3	0.83098	4	0.054514	0.13637	1	2396	1	-0.98262	4	0.84315	0.84457	1	16787	1	0.40916	4	0.031021	0.084268	0.95251	1685	2	0.1461
TJP1	15	4	0.015347	0.049973	1	959	4	1.3442	4	0.11972	0.25205	1	4327	2	1.1345	4	0.47437	0.62357	1	11243	1	-0.65601	4	0.031045	0.084317	0.95251	1686	3	1.3301
LDLRAP1	1	4	0.17846	0.34707	1	5854	2	0.30647	4	0.10302	0.22356	1	3863	2	-1.3531	4	0.013674	0.044837	1	865	2	-2.0365	4	0.031121	0.084472	0.953459	1687	2	-1.2563
TEX36	10	4	0.10606	0.22875	1	4001	2	0.98428	4	0.76658	0.78871	1	15476	1	-0.55233	4	0.91869	0.91858	1	18341	0	-0.66633	4	0.031176	0.084588	0.953745	1688	3	0.38987
MNS1	15	4	0.085867	0.19326	1	3416	2	1.231	4	0.052926	0.13332	1	2344	1	0.42877	4	0.48686	0.63537	1	11434	1	-0.79191	4	0.031177	0.084592	0.953745	1689	2	-0.49738
MPDU1	17	4	0.47979	0.62898	1	11119	1	0.44436	4	0.036442	0.10185	1	1772	1	-0.30496	4	0.097236	0.21311	1	3738	2	0.64115	4	0.031217	0.084659	0.953807	1690	3	0.94419
FBXW10	17	4	0.48177	0.63079	1	11152	2	0.53448	4	0.12457	0.26016	1	4446	3	0.93947	4	0.41319	0.56555	1	10272	2	0.18455	4	0.031232	0.084692	0.953807	1691	3	0.8838
BEST1	11	4	0.39653	0.55043	1	9831	2	0.79691	4	0.30069	0.46187	1	8343	2	0.87764	4	0.572	0.68749	1	12587	1	-0.12864	4	0.031379	0.084987	0.955677	1692	3	1.0276
ASGR2	17	4	0.10318	0.22368	1	3922	2	0.90783	4	0.011341	0.037732	1	720	2	1.7179	4	0.019336	0.061861	1	1128	4	1.4928	4	0.031388	0.085006	0.955677	1693	3	1.0918
GAS7	17	4	0.8176	0.82395	1	16199	0	-0.3089	4	0.8368	0.83969	1	16734	1	-0.0039556	4	0.047713	0.12277	1	2236	3	1.1175	4	0.031407	0.085049	0.955677	1694	3	0.62652
ILDR2	1	4	0.090268	0.20102	1	3558	2	0.92314	4	0.11059	0.23666	1	4083	2	0.82693	4	0.43497	0.58616	1	10612	1	-0.51676	4	0.03149	0.085218	0.955677	1695	2	0.14018
ADRB2	5	4	0.015171	0.049408	1	953	3	1.7402	4	0.023905	0.075157	1	1326	2	1.4138	4	0.24484	0.40757	1	7219	1	-1.2077	4	0.031523	0.085294	0.955677	1696	2	0.48642
PRNP	20	4	0.019747	0.063054	1	1140	3	1.2077	4	0.14376	0.29184	1	5011	2	1.009	4	0.59917	0.69901	1	12886	1	0.28777	4	0.03153	0.085305	0.955677	1697	3	0.99708
MACROD2	20	4	0.7804	0.79714	1	15518	1	0.4912	4	0.34698	0.5049	1	9318	1	0.22576	4	0.49239	0.64061	1	11531	1	0.36312	4	0.031553	0.085349	0.955677	1698	3	0.78444
SQSTM1	5	4	0.34465	0.5021	1	8998	2	0.57433	4	0.21162	0.37958	1	6595	2	0.5918	4	0.3641	0.51923	1	9505	2	0.30137	4	0.031565	0.085371	0.955677	1699	3	0.92104
FOXQ1	6	4	0.42113	0.57366	1	10205	2	0.59499	4	0.024797	0.077667	1	1364	4	1.0527	4	0.1955	0.36172	1	6302	2	0.7811	4	0.03157	0.085381	0.955677	1700	3	0.94696
ZNF793	19	4	0.094226	0.20807	1	3673	2	0.92061	4	0.011986	0.03968	1	760	4	1.2889	4	0.047885	0.12309	1	2242	2	1.0682	4	0.031627	0.085482	0.956277	1701	2	0.88098
ARRB1	11	4	0.34787	0.50512	1	9065	1	0.38784	4	0.002512	0.008934	0.771236	229	3	1.323	4	0.091344	0.20264	1	3568	2	0.66972	4	0.031648	0.08553	0.956277	1702	3	1.1474
RAD51B	14	4	0.09658	0.21216	1	3732	2	0.90637	4	0.43562	0.58754	1	10670	2	0.53781	4	0.27226	0.43327	1	7753	2	0.66807	4	0.031701	0.085633	0.956319	1703	3	0.95025
ABCF2	7	4	0.28748	0.44873	1	7937	2	0.8026	4	0.30511	0.46598	1	8435	2	0.92007	4	0.30523	0.46411	1	8397	1	0.053046	4	0.031704	0.085639	0.956319	1704	3	0.98458
GRIN2D	19	4	0.099169	0.21678	1	3812	1	-1.9506	4	0.0026222	0.0092953	0.77315	236	3	2.2985	4	0.0074635	0.025478	0.977997	518	2	1.1717	4	0.031732	0.085694	0.956319	1705	2	0.65387
RP9	7	4	0.045852	0.11977	1	2119	3	1.3672	4	0.19292	0.36235	1	6231	2	0.61818	4	0.15225	0.3054	1	5284	1	-0.23717	4	0.031753	0.085739	0.956319	1706	2	0.32615
PTCHD2	9	4	0.17771	0.3459	1	5832	2	0.51467	4	0.22096	0.38815	1	6777	1	-1.458	4	0.16075	0.31906	1	5544	2	0.9929	4	0.031805	0.08584	0.956319	1707	2	-0.84492
GPR19	12	4	0.043791	0.11582	1	2057	3	1.6033	4	0.67839	0.73922	1	14103	1	0.57096	4	0.018442	0.059218	1	1086	3	1.124	4	0.031816	0.085863	0.956319	1708	2	0.68346
S1PR2	19	4	0.40881	0.56205	1	10004	2	0.46046	4	0.00050119	0.0018235	0.47634	77	1	-0.41628	4	0.30784	0.4665	1	8445	1	-0.35066	4	0.031851	0.085936	0.956319	1710	3	0.80465
LITAF	16	4	0.15794	0.31465	1	5342	1	-0.42402	4	0.054476	0.13629	1	2394	3	1.5204	4	0.27717	0.43789	1	7853	2	0.39205	4	0.031857	0.085943	0.956319	1711	3	0.94848
FKBP2	11	4	0.3398	0.49756	1	8920	2	-0.53645	4	0.01252	0.041289	1	789	3	1.7721	4	0.28971	0.44951	1	8093	2	0.6709	4	0.031868	0.085961	0.956319	1712	2	0.44099
F5	1	4	0.24479	0.40915	1	7141	1	-2.4661	4	0.014654	0.04785	1	889	3	1.6977	4	0.10978	0.2349	1	4076	1	0.28956	4	0.031958	0.086155	0.957947	1713	2	0.14371
POTEF	2	4	0.023466	0.073869	1	1335	1	-3.876	4	0.17204	0.33702	1	5750	2	-0.57896	4	0.38196	0.53595	1	9781	2	0.40439	4	0.03201	0.086266	0.957966	1714	1	-1.6232
CCDC114	19	4	0.03349	0.095762	1	1702	3	1.5829	4	0.0062602	0.021557	0.962383	445	3	2.0573	4	0.069842	0.16428	1	2983	2	-2.5797	4	0.032036	0.086314	0.957966	1715	2	0.052958
ANO3	11	4	0.17548	0.3424	1	5771	2	0.66212	4	0.017426	0.056223	1	1026	4	1.794	4	0.77779	0.7943	1	15557	1	0.29945	4	0.032049	0.086344	0.957966	1716	3	0.96345
KRTAP10-5	21	4	0.86607	0.86588	1	17141	0	-0.034164	4	0.28157	0.44417	1	7936	2	0.35359	4	0.02651	0.081238	1	1458	3	1.4848	4	0.03206	0.08637	0.957966	1717	3	0.72741
SPDYE6	7	4	0.17317	0.33878	1	5710	2	-0.022083	4	0.05265	0.13279	1	2338	3	1.5419	4	0.10927	0.23402	1	4057	3	1.0043	4	0.032077	0.08641	0.957966	1718	3	0.9642
CENPJ	13	4	0.057369	0.14143	1	2526	3	1.337	4	0.69688	0.74874	1	14363	1	0.102	4	0.0788	0.18045	1	3254	3	1.0252	4	0.032094	0.086443	0.957966	1719	3	0.9763
MROH5	8	4	0.95477	0.95482	1	18997	0	-0.28705	4	0.19159	0.36109	1	6197	2	0.81631	4	0.10459	0.22589	1	3937	3	0.92267	4	0.032253	0.086771	0.960557	1720	3	0.67953
43525		4	0.15007	0.30203	1	5134	2	-0.026649	4	0.90036	0.90015	1	17953	0	-0.43977	4	0.22156	0.38592	1	6802	2	0.39668	4	0.03229	0.086839	0.960557	1721	3	0.39891
OR2B2	6	4	0.79233	0.80531	1	15722	1	0.3841	4	0.49325	0.64166	1	11609	1	0.39188	4	0.18918	0.35573	1	6193	1	0.21605	4	0.032299	0.086862	0.960557	1722	2	0.372
OGT	X	4	0.25858	0.42198	1	7382	2	0.9597	4	0.50781	0.65529	1	11854	2	0.1814	4	0.13064	0.26995	1	4659	2	1.0288	4	0.032322	0.086914	0.960557	1723	3	0.96061
PAPL	19	4	0.0057163	0.019801	0.829423	473	2	1.432	4	0.79012	0.8043	1	15879	1	0.17671	4	0.15483	0.30954	1	5377	2	0.80379	4	0.032322	0.086915	0.960557	1724	3	0.92542
ANKRD20A4	9	4	0.8974	0.8972	1	17808	0	-0.12315	4	0.2225	0.38956	1	6811	2	0.88029	4	0.15938	0.31686	1	5501	2	0.6447	4	0.032401	0.087066	0.960714	1725	3	0.76898
EXO1	1	4	0.92534	0.92524	1	18380	0	-0.15492	4	0.28133	0.44395	1	7929	2	0.15819	4	0.29882	0.45805	1	8274	1	0.43873	4	0.032416	0.087102	0.960714	1726	3	0.70532
CNN1	19	4	0.07661	0.17684	1	3131	1	-0.86316	4	0.16428	0.3248	1	5562	3	1.026	4	0.00061269	0.0022326	0.462948	97	4	2.3759	4	0.032426	0.08712	0.960714	1727	3	0.99577
SMPDL3B	1	4	0.18258	0.3516	1	5937	1	0.21935	4	0.35188	0.50932	1	9429	2	0.832	4	0.15555	0.31069	1	5393	2	0.72651	4	0.032453	0.087181	0.960799	1729	3	0.75171
POU2F2	19	4	0.03164	0.092068	1	1636	2	1.1214	4	0.0059863	0.020691	0.962383	425	2	-0.93332	4	0.012136	0.040117	1	787	2	0.39288	4	0.032479	0.08724	0.960799	1730	1	-0.83361
MCCC2	5	4	0.70229	0.75066	1	14211	1	0.36866	4	0.60634	0.70579	1	13137	1	0.40755	4	0.29574	0.45508	1	8209	1	0.016421	4	0.032499	0.087284	0.960799	1731	3	0.72954
FAM32A	19	4	0.048381	0.12445	1	2212	2	-0.010302	4	0.023586	0.074226	1	1313	2	0.10522	4	0.11835	0.24949	1	4293	2	0.43184	4	0.032531	0.087336	0.960799	1732	1	-1.2765
WAPAL	10	4	0.41696	0.56971	1	10129	1	-3.8159	4	0.021525	0.068262	1	1221	2	-1.4379	4	0.00059371	0.0021735	0.455394	96	2	1.2339	4	0.032542	0.087367	0.960799	1733	1	-1.462
LRP6	12	4	0.039368	0.10727	1	1901	2	0.97141	4	0.095751	0.21091	1	3675	3	1.1626	4	0.021641	0.068592	1	1250	2	1.0312	4	0.032583	0.087448	0.961162	1734	3	0.95476
MYCBP	1	4	0.1488	0.29997	1	5094	2	-0.83613	4	0.33848	0.49697	1	9152	2	0.34186	4	0.14824	0.29896	1	5159	2	-1.7413	4	0.032615	0.087514	0.961305	1735	2	-0.38084
CYSTM1	5	4	0.74618	0.77558	1	14908	1	0.45038	4	0.0065719	0.022586	0.965845	466	1	-0.34112	4	0.13229	0.27276	1	4703	2	0.59582	4	0.032635	0.087558	0.961305	1736	2	0.38863
NTRK1	1	4	0.95848	0.95859	1	19081	0	-0.65871	4	0.039469	0.10777	1	1880	2	1.2595	4	0.33957	0.49631	1	9085	2	0.64066	4	0.032679	0.087642	0.961305	1737	3	0.76211
CYP2S1	19	4	0.088944	0.19875	1	3522	2	0.98811	4	0.057745	0.14242	1	2506	2	0.83409	4	0.10967	0.23472	1	4073	3	1.2362	4	0.032687	0.087659	0.961305	1738	2	0.039773
SAMHD1	20	4	0.04696	0.12188	1	2162	2	1.0639	4	0.34926	0.50696	1	9381	2	-1.3017	4	0.050778	0.12856	1	2360	1	-0.59687	4	0.032706	0.0877	0.961305	1739	3	0.68821
ZNF35	3	4	0.062281	0.15062	1	2683	2	0.56542	4	0.16984	0.33362	1	5711	3	1.1782	4	0.23576	0.39918	1	7059	2	0.81188	4	0.032732	0.087755	0.961391	1740	3	1.1382
SNX30	9	4	0.74578	0.77533	1	14899	1	0.05876	4	0.10123	0.22053	1	3804	3	1.1404	4	0.60236	0.70041	1	12925	1	0.20457	4	0.032774	0.087833	0.961395	1741	3	0.94906
NFE2L2	2	4	0.085115	0.19194	1	3390	2	1.0996	4	0.03542	0.09984	1	1734	2	1.1148	4	0.0016937	0.0060637	0.648752	187	1	-1.6799	4	0.032843	0.087974	0.961395	1742	2	-0.53468
PI4K2A	10	4	0.6855	0.7418	1	13973	1	-0.23522	4	0.046905	0.12204	1	2147	3	1.0803	4	0.55666	0.68126	1	12427	1	-0.84539	4	0.032886	0.088071	0.961395	1743	3	0.32963
MARS2	2	4	0.12002	0.25245	1	4352	3	1.2684	4	0.48077	0.63002	1	11397	1	0.049822	4	0.26608	0.42747	1	7639	2	0.57846	4	0.032891	0.088082	0.961395	1744	3	1.1079
HRC	19	4	0.33331	0.49161	1	8802	1	-0.46796	4	0.09461	0.20889	1	3644	2	1.0433	4	0.053623	0.13399	1	2479	2	0.13165	4	0.032895	0.08809	0.961395	1745	1	-0.78289
ABRA	8	4	0.17433	0.34061	1	5740	3	1.0078	4	0.11913	0.2511	1	4313	2	0.58147	4	0.096215	0.21127	1	3704	3	0.92175	4	0.032917	0.088131	0.961395	1746	3	1.108
FFAR3	19	4	0.66861	0.73332	1	13735	1	-1.6164	4	0.035557	0.10011	1	1739	2	-1.728	4	0.0018548	0.0066318	0.698383	190	2	-0.75786	4	0.032967	0.088238	0.961395	1747	2	-1.4219
TAS2R42	12	4	0.090463	0.20138	1	3561	1	-3.4897	4	0.49504	0.64332	1	11638	1	0.71328	4	0.081916	0.18602	1	3329	2	0.77332	4	0.032998	0.088299	0.961395	1748	2	-0.75463
RNF222	17	4	0.28463	0.44613	1	7874	2	0.69854	4	0.070494	0.16603	1	2926	2	-0.025931	4	0.035274	0.098705	1	1801	2	1.1053	4	0.033029	0.088362	0.961395	1749	3	1.1135
TAC3	12	4	0.15538	0.3105	1	5274	2	1.0881	4	0.72882	0.76618	1	14874	1	0.81929	4	0.038497	0.10504	1	1918	2	-2.6787	4	0.033093	0.088484	0.961395	1750	2	-0.51419
AKR7A3	1	4	0.80668	0.81568	1	16012	1	0.49226	4	0.090437	0.20151	1	3529	3	1.1661	4	0.70221	0.74892	1	14311	1	-0.054142	4	0.033102	0.088504	0.961395	1751	3	0.81817
PRRT1	6	4	0.32524	0.48409	1	8644	2	0.6296	4	0.37868	0.53416	1	9791	1	0.48912	4	0.34692	0.50323	1	9241	2	0.4655	4	0.033142	0.088598	0.961395	1752	3	0.85923
MYC	8	4	0.084159	0.19028	1	3363	2	1.1415	4	0.014697	0.047978	1	891	2	1.0762	4	0.2553	0.41738	1	7422	2	0.40361	4	0.033155	0.088618	0.961395	1753	1	-0.65244
IMP3	15	4	0.021395	0.067859	1	1228	3	1.7109	4	0.051767	0.13113	1	2300	3	1.6085	4	0.55453	0.68043	1	12407	1	0.51231	4	0.033157	0.088621	0.961395	1754	2	0.65049
YTHDF2	1	4	0.74468	0.77468	1	14883	1	0.027882	4	0.33819	0.49669	1	9145	2	0.85087	4	0.053175	0.13312	1	2455	3	1.246	4	0.033218	0.088748	0.961395	1755	3	0.97313
AHCTF1	1	4	0.051696	0.13073	1	2349	3	1.4527	4	0.92392	0.92385	1	18419	0	-0.35974	4	0.020968	0.066628	1	1211	2	0.83651	4	0.033259	0.08882	0.961395	1756	3	0.58955
EXOSC10	1	4	0.33556	0.49363	1	8836	2	0.44352	4	0.10855	0.23317	1	4026	3	1.298	4	0.077818	0.17867	1	3219	1	0.64371	4	0.03327	0.088852	0.961395	1757	3	1.2146
UBE2T	1	4	0.13258	0.27339	1	4682	2	0.85777	4	0.85303	0.85378	1	17027	1	0.42227	4	0.06269	0.15098	1	2755	2	1.0049	4	0.033305	0.08893	0.961395	1758	3	0.6873
ATG10	5	4	0.29602	0.45664	1	8089	1	0.043808	4	0.38801	0.54287	1	9931	1	0.45114	4	0.03403	0.09629	1	1754	2	0.55787	4	0.033316	0.088954	0.961395	1759	3	0.85082
RNF19A	8	4	0.18101	0.35015	1	5911	1	-4.8859	4	0.0012834	0.0046431	0.614415	151	3	2.3897	4	0.15245	0.30572	1	5293	1	-4.737	4	0.033325	0.088972	0.961395	1760	1	-3.1958
DUOX1	15	4	0.14929	0.30075	1	5110	2	0.80912	4	0.48043	0.62971	1	11389	1	-0.3514	4	0.17604	0.34327	1	5911	3	0.74317	4	0.033328	0.088976	0.961395	1761	3	0.74297
MASP2	1	4	0.18801	0.35658	1	6044	2	0.41698	4	0.27193	0.43527	1	7744	1	0.17537	4	0.035196	0.098554	1	1799	2	1.3034	4	0.03334	0.089001	0.961395	1762	3	0.96063
MSI2	17	4	0.5165	0.66351	1	11714	2	0.54287	4	0.078278	0.18004	1	3158	3	1.4187	4	0.76128	0.78356	1	15279	1	0.22328	4	0.03336	0.089043	0.961395	1763	2	0.77787
PFKFB3	10	4	0.0089546	0.030318	0.907662	666	2	-2.1202	4	0.13047	0.26993	1	4629	1	-5.8951	4	0.49105	0.63933	1	11505	1	0.4291	4	0.033363	0.089052	0.961395	1764	1	-4.2963
XBP1	22	4	0.50165	0.64944	1	11490	2	0.51331	4	0.34955	0.50724	1	9389	2	0.69088	4	0.10063	0.21907	1	3830	3	1.1616	4	0.033398	0.089119	0.961395	1765	3	0.90723
HIST1H2AC	6	4	0.81408	0.82125	1	16135	1	0.69971	4	0.22054	0.38777	1	6768	2	0.59978	4	0.0013611	0.0049143	0.623233	158	3	1.1563	4	0.033413	0.089151	0.961395	1766	3	1.0715
TPRKB	2	4	0.052629	0.13249	1	2374	1	-3.2745	4	0.11681	0.24721	1	4247	3	1.1853	4	0.3871	0.54079	1	9864	2	0.67465	4	0.033415	0.089158	0.961395	1767	2	-0.92102
NDUFB1	14	4	0.055143	0.13727	1	2446	2	0.54313	4	0.0088502	0.030001	1	593	2	1.1581	4	0.46689	0.61648	1	11117	2	0.47395	4	0.033438	0.089214	0.961395	1768	3	1.0551
MIER3	5	4	0.13258	0.27339	1	4681	1	0.05691	4	0.12503	0.26091	1	4460	1	0.10602	4	0.34426	0.50072	1	9184	1	-3.9627	4	0.033442	0.089223	0.961395	1769	1	-1.613
SLC4A2	7	4	0.58441	0.69512	1	12584	1	-0.0046376	4	0.088848	0.19877	1	3477	3	1.2429	4	0.032131	0.092498	1	1676	1	-0.23593	4	0.033467	0.089275	0.961395	1770	3	0.62922
ZNF766	19	4	0.0030472	0.010768	0.712855	303	2	1.1046	4	0.13509	0.27767	1	4743	2	-0.6972	4	0.018718	0.06	1	1093	1	0.51199	4	0.033473	0.089285	0.961395	1771	3	1.2553
KCNAB3	17	4	0.32774	0.48646	1	8690	2	-1.2828	4	0.019894	0.063494	1	1143	2	0.83016	4	0.079716	0.1821	1	3276	3	1.0341	4	0.033509	0.089353	0.961447	1774	2	0.5691
SLC52A2	8	4	0.94505	0.94504	1	18789	0	-0.77319	4	0.056005	0.13912	1	2446	3	1.2935	4	0.068106	0.1611	1	2928	3	1.2062	4	0.033526	0.089386	0.961447	1775	3	0.77549
ADAL	15	4	0.12874	0.26697	1	4596	3	1.163	4	0.28174	0.44432	1	7943	1	-1.0559	4	0.079984	0.18257	1	3285	2	0.61112	4	0.033571	0.089479	0.961939	1776	3	0.39011
VPS13A	9	4	0.043733	0.11572	1	2055	3	1.5504	4	0.27567	0.43874	1	7819	1	-5.2244	4	0.062021	0.14971	1	2729	2	0.6241	4	0.033623	0.089579	0.962498	1777	1	-2.6358
SLC25A27	6	4	0.14147	0.28808	1	4920	3	0.96152	4	0.15578	0.31119	1	5337	2	0.74251	4	0.4858	0.63441	1	11421	2	0.54796	4	0.033648	0.089634	0.962571	1778	3	0.86972
C19orf84	19	4	0.0024201	0.0086312	0.671073	258	2	1.4781	4	0.20681	0.37515	1	6509	1	-0.51197	4	0.10903	0.23359	1	4049	3	1.0684	4	0.033727	0.089785	0.963138	1779	3	0.70206
DCP1A	3	4	0.042281	0.11293	1	2010	2	-0.19897	4	0.28059	0.44329	1	7910	2	0.56328	4	0.84293	0.84437	1	16784	0	-3.2475	4	0.033739	0.089814	0.963138	1780	2	-1.0069
PARP4	13	4	0.07238	0.1692	1	3000	2	0.8456	4	0.58402	0.69635	1	12862	1	-0.83511	4	0.81445	0.82083	1	16249	0	0.047396	4	0.033748	0.08983	0.963138	1781	3	0.34993
FAT4	4	4	0.34727	0.50456	1	9053	2	0.14567	4	0.28919	0.45115	1	8090	2	-0.16852	4	0.05295	0.13266	1	2448	3	0.89848	4	0.03392	0.090176	0.965304	1782	3	0.77837
OR10K1	1	4	0.063601	0.1531	1	2727	3	1.454	4	0.022594	0.071338	1	1270	3	1.7142	4	0.35917	0.51466	1	9441	2	0.23907	4	0.033939	0.090226	0.965312	1783	3	1.2205
TMEM61	1	4	0.58293	0.69451	1	12566	1	-0.54857	4	0.010967	0.036565	1	696	3	1.5325	4	0.039499	0.10702	1	1960	3	1.0991	4	0.03397	0.090295	0.965312	1784	3	0.85869
GPN2	1	4	0.011861	0.039299	0.960366	816	2	-1.7639	4	0.26095	0.42508	1	7515	2	0.086673	4	0.00023867	0.00087053	0.330375	53	4	2.501	4	0.033987	0.090321	0.965312	1785	2	-0.10307
UBE2Q1	1	4	0.39521	0.5492	1	9803	1	-2.3153	4	0.098484	0.21573	1	3734	2	-3.1445	4	0.78032	0.79604	1	15602	1	0.3075	4	0.034047	0.090447	0.966141	1786	2	-1.7362
IL37	2	4	0.29232	0.45324	1	8019	2	0.91378	4	0.33811	0.49662	1	9144	2	0.3094	4	0.034768	0.097721	1	1782	2	-2.7575	4	0.034068	0.090502	0.966216	1787	2	-0.76911
LHX2	9	4	0.18973	0.35819	1	6079	2	0.39871	4	0.13511	0.27769	1	4744	1	-1.423	4	0.069587	0.16383	1	2969	3	1.1259	4	0.034133	0.09064	0.967015	1789	2	0.46557
UNC5A	5	4	0.50348	0.6512	1	11510	2	0.73403	4	0.37472	0.53053	1	9729	2	0.96061	4	0.06983	0.16425	1	2982	2	1.1152	4	0.034209	0.090785	0.967015	1790	3	0.92246
EPN2	17	4	0.14608	0.29554	1	5026	1	0.18047	4	0.32718	0.48661	1	8915	2	0.53913	4	0.0023668	0.0084407	0.782612	215	3	1.8816	4	0.034295	0.090969	0.967015	1791	3	0.93573
ADK	10	4	0.37434	0.52966	1	9477	1	0.30818	4	0.914	0.9139	1	18223	0	0.2252	4	0.8954	0.89517	1	17843	0	0.34287	4	0.034306	0.090992	0.967015	1792	3	0.72468
TM6SF2	19	4	0.15095	0.30341	1	5158	3	0.86491	4	0.35805	0.51508	1	9517	1	0.074967	4	0.66956	0.73189	1	13842	1	0.34484	4	0.034382	0.091142	0.967015	1793	3	0.83163
KRTAP9-8	17	4	0.17874	0.34751	1	5860	3	0.81554	4	0.50215	0.65001	1	11768	2	0.30269	4	0.98945	0.98952	1	19762	0	-0.3124	4	0.034389	0.091156	0.967015	1794	3	0.65668
FAM198B	4	4	0.52212	0.6688	1	11810	2	0.6641	4	0.88671	0.88634	1	17679	0	-0.21495	4	0.43994	0.59086	1	10688	2	0.54867	4	0.034395	0.091165	0.967015	1795	3	0.60103
NDRG2	14	4	0.12052	0.25328	1	4364	2	-2.0959	4	0.50936	0.65676	1	11881	1	-3.0377	4	0.36383	0.51898	1	9504	1	-2.4574	4	0.034419	0.091224	0.967015	1796	2	-2.0383
PRELID1	5	4	0.085583	0.19276	1	3407	3	1.0727	4	0.13978	0.28542	1	4890	1	0.022132	4	0.16209	0.3213	1	5571	3	0.74893	4	0.034454	0.091296	0.967015	1797	3	1.1849
SCAND1	20	4	0.15921	0.31668	1	5377	3	1.1894	4	0.010714	0.035814	1	686	3	1.9217	4	0.37576	0.53014	1	9677	2	0.73186	4	0.03449	0.091369	0.967015	1798	3	1.2502
MIA	19	4	0.043457	0.1152	1	2047	2	1.3935	4	0.088173	0.19759	1	3459	2	0.057528	4	0.82205	0.82684	1	16382	1	0.63198	4	0.034512	0.091413	0.967015	1799	3	0.93901
SYT16	14	4	0.91406	0.91396	1	18165	0	0.30608	4	0.1222	0.2562	1	4391	2	0.83142	4	0.80942	0.81699	1	16147	1	0.4337	4	0.034596	0.091562	0.967015	1800	3	0.85416
RAB38	11	4	0.78331	0.79908	1	15562	1	0.5161	4	0.10125	0.22056	1	3806	3	1.2603	4	0.0072655	0.02484	0.977766	505	3	1.4271	4	0.03462	0.091608	0.967015	1801	2	0.28542
PCDHA11	5	4	0.11983	0.25212	1	4349	3	0.91924	4	0.18561	0.35556	1	6075	2	0.40902	4	0.47218	0.62151	1	11209	2	0.40473	4	0.034632	0.091626	0.967015	1802	3	0.95279
WDR87	19	4	0.066296	0.15812	1	2819	2	1.0044	4	0.096645	0.21246	1	3695	3	1.2548	4	0.0072251	0.024716	0.97617	501	2	0.58351	4	0.034662	0.091692	0.967015	1804	2	0.35711
IARS2	1	4	0.057526	0.14172	1	2531	3	1.2838	4	0.58738	0.69776	1	12898	1	-0.37774	4	0.83392	0.83666	1	16625	1	0.061708	4	0.034709	0.091781	0.967015	1805	3	0.82328
TMEM252	9	4	0.029555	0.087944	1	1555	2	-2.6079	4	0.90082	0.90061	1	17966	0	-1.6296	4	0.0066597	0.022872	0.97617	459	1	0.0075588	4	0.034714	0.091794	0.967015	1806	1	-2.525
JADE3	X	4	0.7341	0.76835	1	14704	1	0.1763	4	0.89911	0.8989	1	17923	0	0.41905	4	0.15217	0.30527	1	5278	3	0.83459	4	0.034715	0.091796	0.967015	1807	3	0.71986
TP53TG3D	16	4	0.017305	0.055866	1	1051	2	0.85166	4	0.19308	0.36249	1	6234	2	0.38171	4	0.23968	0.40284	1	7120	1	-0.11975	4	0.034766	0.09189	0.967015	1808	2	-0.46297
MTERF3	8	4	0.17563	0.34264	1	5773	3	0.85432	4	0.23312	0.39934	1	7001	2	0.75532	4	0.34564	0.50202	1	9215	2	0.5717	4	0.034858	0.092069	0.967015	1809	3	1.0446
FAM126B	2	4	0.89908	0.89886	1	17834	0	0.20956	4	0.021118	0.067063	1	1195	2	1.0717	4	0.046643	0.1208	1	2200	2	0.29513	4	0.03487	0.092096	0.967015	1810	2	-0.98889
TRMT1	19	4	0.13919	0.2844	1	4876	2	0.47947	4	0.33491	0.49368	1	9060	2	0.91415	4	0.37566	0.53006	1	9675	1	-0.58097	4	0.034922	0.092188	0.967015	1811	2	-0.13096
TCTN2	12	4	0.70895	0.75423	1	14299	1	-0.33036	4	0.079009	0.18135	1	3184	3	1.2125	4	0.88379	0.88348	1	17604	0	0.10901	4	0.03496	0.092261	0.967015	1812	3	0.78362
GRIK1	21	4	0.013764	0.045115	1	897	2	1.0242	4	0.018574	0.059588	1	1079	2	-1.0653	4	0.13594	0.27889	1	4811	3	1.0554	4	0.034974	0.09229	0.967015	1813	2	0.49575
SRSF11	1	4	0.041459	0.11133	1	1983	3	1.2946	4	0.13796	0.28248	1	4827	2	0.33333	4	0.55079	0.67895	1	12363	1	-0.21004	4	0.034984	0.09231	0.967015	1815	3	1.0316
PHRF1	11	4	0.15134	0.30406	1	5164	3	0.83097	4	0.31878	0.47869	1	8728	2	0.75721	4	0.18103	0.34819	1	6010	2	0.43599	4	0.03499	0.092321	0.967015	1816	3	0.8887
NOL7	6	4	0.31122	0.47096	1	8376	1	0.35521	4	0.48708	0.63589	1	11504	1	0.82776	4	0.010377	0.034732	1	684	1	-2.2643	4	0.035044	0.092433	0.967015	1817	2	-0.84851
NSUN5	7	4	0.27159	0.43408	1	7635	2	0.24119	4	0.16442	0.32501	1	5566	3	0.9445	4	0.51202	0.65915	1	11857	2	0.71614	4	0.035056	0.092453	0.967015	1818	3	1.0946
RAB23	6	4	0.13699	0.28078	1	4804	2	1.1533	4	0.024454	0.076679	1	1348	2	1.2508	4	0.0042642	0.014909	0.861844	341	4	2.1546	4	0.035078	0.092507	0.967015	1819	2	0.049823
UBL4A	X	4	0.42504	0.57735	1	10269	2	0.47066	4	0.042112	0.11288	1	1981	3	1.4789	4	0.14703	0.297	1	5116	2	-2.2014	4	0.0351	0.092537	0.967015	1821	2	0.29683
PPAPDC1B	10	4	0.17395	0.34003	1	5729	2	0.93076	4	0.45001	0.60104	1	10899	2	0.20379	4	0.46007	0.60993	1	11013	1	0.23205	4	0.035133	0.092611	0.967015	1822	3	0.85526
TEX10	9	4	0.051664	0.13067	1	2345	3	1.5844	4	0.13479	0.27715	1	4735	2	0.54612	4	0.067245	0.15951	1	2903	3	1.1481	4	0.035163	0.092672	0.967015	1823	3	1.4439
GATSL3	19	4	0.042025	0.11244	1	1997	2	0.97324	4	0.060056	0.1467	1	2588	3	1.1529	4	0.78776	0.80119	1	15747	0	-1.0317	4	0.035193	0.092742	0.967015	1824	3	0.72738
ZDHHC2	8	4	0.42946	0.5815	1	10334	2	0.65096	4	0.22507	0.39192	1	6856	2	0.62081	4	0.51958	0.66636	1	11982	2	0.39553	4	0.035199	0.092753	0.967015	1825	3	0.92455
SLC13A2	17	4	0.12121	0.25445	1	4382	2	0.77683	4	0.15087	0.30334	1	5204	1	-0.69725	4	0.072753	0.16951	1	3075	2	0.2289	4	0.035223	0.092809	0.967015	1826	3	0.91602
SLC25A11	17	4	0.15596	0.31142	1	5291	2	0.69021	4	0.17088	0.33526	1	5729	3	1.1004	4	0.074177	0.17208	1	3119	3	1.342	4	0.035295	0.092954	0.967015	1827	3	1.0407
IFT74	9	4	0.32615	0.48495	1	8667	2	0.72653	4	0.0098335	0.033067	1	636	4	1.5133	4	0.023121	0.072838	1	1316	2	-0.4333	4	0.035296	0.092957	0.967015	1828	2	0.036339
ABCB11	2	4	0.10103	0.22003	1	3864	2	0.53158	4	0.208	0.37621	1	6530	2	0.85326	4	0.074946	0.17348	1	3138	2	0.54463	4	0.035318	0.093005	0.967015	1829	2	0.72399
GCAT	22	4	0.77211	0.79165	1	15363	1	0.4879	4	0.78246	0.79906	1	15742	1	0.049142	4	0.074401	0.17247	1	3123	3	1.014	4	0.03535	0.093071	0.967015	1830	3	0.89451
COL17A1	10	4	0.070891	0.16652	1	2952	1	-4.9354	4	0.1819	0.35217	1	6006	2	-1.0533	4	0.04807	0.12343	1	2249	1	-2.189	4	0.035552	0.093511	0.967015	1831	1	-3.34
ATP4B	1	4	0.108	0.23209	1	4051	2	-0.23903	4	0.12426	0.25966	1	4442	2	0.10623	4	0.27628	0.43704	1	7835	1	0.21303	4	0.035597	0.093595	0.967015	1832	1	0.13514
OR1K1	9	4	0.44396	0.59506	1	10560	2	0.75259	4	0.14466	0.29334	1	5026	2	0.90719	4	0.80639	0.81471	1	16077	1	-0.46193	4	0.035615	0.093637	0.967015	1833	3	0.84483
ZNF573	19	4	0.052786	0.13278	1	2378	3	1.1033	4	0.18123	0.35137	1	5987	1	-0.2436	4	0.036775	0.10167	1	1859	3	1.4376	4	0.035637	0.093687	0.967015	1834	2	0.19281
C1orf94	1	4	0.90245	0.90225	1	17916	0	0.23653	4	0.59412	0.70058	1	12981	1	0.31884	4	0.13437	0.27622	1	4761	2	0.42123	4	0.035645	0.093703	0.967015	1835	3	0.74304
NEIL2	8	4	0.28604	0.44743	1	7903	2	0.71441	4	0.024189	0.075943	1	1334	3	1.3682	4	0.021286	0.067553	1	1229	4	1.4883	4	0.035649	0.093707	0.967015	1836	2	0.74082
MUCL1	12	4	0.89584	0.89561	1	17772	0	-0.46301	4	0.067787	0.16111	1	2854	3	1.2766	4	0.085816	0.19287	1	3430	3	1.0092	4	0.035657	0.09372	0.967015	1837	3	0.93714
FASN	17	4	0.58708	0.69626	1	12621	1	0.54577	4	0.17731	0.3453	1	5874	2	0.36275	4	0.052202	0.13124	1	2423	2	0.82402	4	0.035659	0.093722	0.967015	1838	2	-0.62391
EIF2AK3	2	4	0.085884	0.19329	1	3417	3	1.0058	4	0.12629	0.263	1	4501	2	1.0278	4	0.14277	0.29008	1	4996	3	0.87255	4	0.035692	0.093806	0.967015	1839	2	0.50957
GSTT2B	22	4	0.43413	0.58589	1	10412	2	0.38501	4	0.33201	0.49106	1	9004	2	0.60202	4	0.16916	0.33247	1	5734	3	0.74055	4	0.035718	0.093863	0.967015	1840	3	0.90023
FAH	15	4	0.10648	0.22944	1	4012	2	0.7246	4	0.086746	0.19505	1	3411	3	1.099	4	0.6352	0.71525	1	13371	1	0.7074	4	0.03576	0.093934	0.967015	1842	3	1.2274
AMPH	7	4	0.87037	0.87005	1	17239	1	-0.22604	4	0.37693	0.53255	1	9772	2	0.69786	4	0.014718	0.048034	1	916	3	1.4505	4	0.035797	0.094006	0.967015	1843	3	1.063
CYP8B1	3	4	0.026882	0.082571	1	1458	1	-2.6433	4	0.034391	0.097841	1	1697	2	1.3031	4	0.30895	0.46755	1	8461	2	0.78268	4	0.035804	0.09402	0.967015	1844	2	-0.20769
PCDHGA1	5	4	0.41032	0.5635	1	10029	2	0.25031	4	0.27091	0.43429	1	7723	2	0.77028	4	0.21643	0.38118	1	6703	2	-0.016407	4	0.035813	0.094038	0.967015	1845	3	0.96924
PSME3	17	4	0.049361	0.1263	1	2259	3	1.5334	4	0.050056	0.12791	1	2251	2	-0.53829	4	0.014411	0.047101	1	902	4	1.5078	4	0.035863	0.094137	0.967015	1846	3	1.3486
NSFL1C	20	4	0.14062	0.28675	1	4906	2	0.57075	4	0.0085019	0.028849	1	571	3	1.7481	4	0.75728	0.78107	1	15197	1	0.43181	4	0.035888	0.094192	0.967015	1847	3	1.0914
CYS1	2	4	0.18241	0.35145	1	5932	1	-0.11993	4	0.056761	0.14057	1	2466	2	1.2949	4	0.38946	0.54301	1	9891	1	0.59022	4	0.035894	0.094202	0.967015	1848	3	0.75679
CDH11	16	4	0.43877	0.59024	1	10478	1	-0.042348	4	0.24583	0.41104	1	7243	2	0.97179	4	0.47369	0.62294	1	11232	1	-0.28909	4	0.035908	0.094234	0.967015	1849	2	0.24425
GPKOW	X	4	0.011419	0.037965	0.953069	794	3	1.8159	4	0.0051623	0.017929	0.944028	377	3	1.8952	4	0.034011	0.096251	1	1752	3	1.2649	4	0.03596	0.094345	0.967015	1850	2	0.17947
ARMC8	3	4	0.1531	0.30684	1	5207	3	1.0617	4	0.5474	0.68181	1	12416	1	0.41824	4	0.302	0.46107	1	8338	2	0.45691	4	0.035967	0.094359	0.967015	1851	3	1.0583
ESR2	14	4	0.68626	0.74219	1	13984	1	0.23705	4	0.094077	0.20796	1	3626	3	1.2846	4	0.42366	0.5755	1	10431	2	0.46825	4	0.036058	0.094538	0.967015	1852	3	0.85775
DSCAML1	11	4	0.14845	0.29939	1	5089	2	0.67352	4	0.28694	0.44904	1	8037	2	0.40935	4	0.75795	0.78147	1	15207	1	-0.36593	4	0.03607	0.094558	0.967015	1853	3	0.84718
CRTC1	19	4	0.038453	0.10547	1	1872	3	0.98272	4	0.67622	0.73813	1	14070	1	-0.48761	4	0.15075	0.30299	1	5227	2	0.18916	4	0.036111	0.094639	0.967015	1854	3	0.62455
FAM114A1	4	4	0.35634	0.5129	1	9224	2	0.75611	4	0.45864	0.60913	1	11055	2	0.77209	4	0.12537	0.2612	1	4511	2	0.67111	4	0.036119	0.094653	0.967015	1856	3	0.66083
SUSD6	14	4	0.17395	0.34001	1	5728	1	0.042762	4	0.064748	0.1555	1	2761	3	1.5358	4	0.50522	0.65274	1	11740	1	-0.15112	4	0.036137	0.094689	0.967015	1857	3	1.1342
CGREF1	2	4	0.44584	0.59681	1	10583	1	0.54533	4	0.0035631	0.012505	0.876717	281	3	1.8636	4	0.60586	0.70191	1	12970	1	-0.074753	4	0.036166	0.09475	0.967015	1858	2	-0.43742
SRBD1	2	4	0.17091	0.3353	1	5652	3	1.1155	4	0.19449	0.3638	1	6266	1	-0.30219	4	0.08367	0.1891	1	3371	3	1.1676	4	0.036167	0.094752	0.967015	1859	3	0.80058
MLXIPL	7	4	0.40848	0.56175	1	10000	1	0.22627	4	0.057886	0.14269	1	2511	2	1.078	4	0.077662	0.17839	1	3213	2	0.25771	4	0.036168	0.094752	0.967015	1860	3	0.69068
GLRB	4	4	0.33488	0.49301	1	8824	1	0.079942	4	0.61863	0.71117	1	13285	1	0.020009	4	0.0043217	0.015089	0.861844	346	4	1.4314	4	0.036308	0.095054	0.967015	1861	3	0.86605
TFRC	3	4	0.61942	0.71025	1	13054	1	0.81309	4	0.92462	0.92452	1	18436	0	-0.42785	4	0.11712	0.24743	1	4258	2	1.0552	4	0.036321	0.095078	0.967015	1862	3	0.78193
PTCHD3	10	4	0.40865	0.5619	1	10003	1	-2.9826	4	0.28781	0.44984	1	8061	2	-0.3547	4	0.13953	0.28481	1	4902	2	0.6583	4	0.036321	0.095082	0.967015	1863	2	-0.58364
ZNF687	1	4	0.26997	0.43252	1	7598	2	0.82745	4	0.78482	0.80063	1	15782	1	0.12738	4	0.67479	0.73448	1	13915	1	0.32892	4	0.036339	0.095109	0.967015	1864	3	0.87666
SUPT4H1	17	4	0.0095463	0.032174	0.916741	696	1	-3.5077	4	0.0088772	0.030079	1	594	2	1.5471	4	0.003772	0.013226	0.84983	308	3	1.7807	4	0.036375	0.095178	0.967015	1865	1	-0.80876
MIER2	19	4	0.27931	0.44125	1	7767	2	0.84225	4	0.094319	0.20838	1	3634	2	0.73975	4	0.88171	0.8814	1	17560	0	-0.19281	4	0.036377	0.095182	0.967015	1866	3	0.9502
PPDPF	20	4	0.59278	0.69866	1	12687	1	0.32404	4	0.35684	0.51393	1	9499	2	0.37597	4	0.45362	0.60381	1	10907	1	-0.13222	4	0.036388	0.095199	0.967015	1867	3	0.6778
MOB1B	4	4	0.017848	0.05749	1	1071	3	1.6618	4	0.20974	0.3778	1	6559	2	1.005	4	0.41175	0.56419	1	10244	2	-0.04878	4	0.036406	0.095238	0.967015	1868	3	1.0115
CORO7	16	4	0.62004	0.71053	1	13069	1	-0.23987	4	0.12157	0.25515	1	4376	2	1.0079	4	0.066377	0.15788	1	2877	3	1.1119	4	0.036432	0.0953	0.967015	1869	2	0.20112
TIMM50	19	4	0.081468	0.18559	1	3289	1	-0.099417	4	0.3103	0.47082	1	8526	1	-2.999	4	0.004253	0.014872	0.861844	340	3	1.8322	4	0.03645	0.095337	0.967015	1870	2	-0.43822
CDR2	16	4	0.24374	0.40816	1	7118	1	-0.29632	4	0.43564	0.58756	1	10671	1	-1.4499	4	0.28918	0.44899	1	8088	1	-2.0311	4	0.036479	0.095392	0.967015	1871	2	-1.6733
C16orf92	16	4	0.019921	0.063563	1	1152	3	1.1686	4	0.015058	0.049057	1	907	3	1.3872	4	0.051556	0.13002	1	2392	2	1.3764	4	0.036488	0.095407	0.967015	1872	2	0.26429
HIST1H4A	6	4	0.9161	0.916	1	18218	0	0.23111	4	0.043387	0.11536	1	2022	3	1.3759	4	0.7382	0.76936	1	14910	1	-0.35203	4	0.036523	0.09547	0.967015	1873	3	0.76328
FAM73B	10	4	0.29326	0.4541	1	8035	2	0.74934	4	0.17762	0.34576	1	5883	2	0.92308	4	0.40062	0.55371	1	10056	1	-0.91917	4	0.036531	0.095487	0.967015	1874	3	0.43141
SDPR	7	4	0.47457	0.62405	1	11034	2	0.62674	4	0.90427	0.90406	1	18027	0	-0.15878	4	0.54214	0.67554	1	12259	1	0.19457	4	0.036578	0.095577	0.967015	1875	3	0.65088
KRT16	17	4	0.80954	0.81782	1	16066	1	-0.27428	4	0.17174	0.33657	1	5746	2	0.89172	4	0.69417	0.74459	1	14194	1	0.42177	4	0.036588	0.095604	0.967015	1876	2	0.67517
YIF1A	11	4	0.018263	0.058698	1	1088	2	-1.8451	4	0.17978	0.34911	1	5951	2	-0.033386	4	0.936	0.936	1	18682	0	-2.3467	4	0.0366	0.095633	0.967015	1877	2	-1.6614
NDST1	5	4	0.39171	0.54586	1	9742	1	-0.22856	4	0.05905	0.14482	1	2549	3	1.0682	4	0.20776	0.37307	1	6547	2	0.6431	4	0.036606	0.095644	0.967015	1878	3	0.64445
YTHDC2	5	4	0.090102	0.20075	1	3555	1	0.54842	4	0.11768	0.24866	1	4266	1	-1.2691	4	0.029432	0.087155	1	1569	3	1.6164	4	0.036634	0.095699	0.967015	1879	3	0.56856
TMEM98	17	4	0.036911	0.10244	1	1812	3	1.3722	4	0.33927	0.4977	1	9168	2	0.86093	4	0.29165	0.45129	1	8130	2	0.83174	4	0.036652	0.095734	0.967015	1880	3	1.1448
SERPINE3	13	4	0.32674	0.4855	1	8678	1	0.26578	4	0.029735	0.088623	1	1542	3	1.693	4	0.86706	0.86679	1	17245	1	-0.63365	4	0.036683	0.09579	0.967015	1881	3	0.69117
CYP4A11	1	4	0.072214	0.16892	1	2994	3	1.3101	4	0.45351	0.60435	1	10959	1	-0.11668	4	0.68812	0.74137	1	14104	1	0.12748	4	0.036695	0.095809	0.967015	1882	3	0.96846
PRR13	12	4	0.54911	0.68098	1	12133	1	-0.2009	4	0.3793	0.53473	1	9801	2	0.68831	4	0.025998	0.080222	1	1432	2	0.26412	4	0.03679	0.095997	0.967015	1883	3	0.62216
RAB26	16	4	0.84343	0.84518	1	16680	0	-0.41167	4	0.70921	0.75528	1	14549	1	0.52761	4	0.48288	0.63161	1	11372	2	0.44798	4	0.0368	0.096015	0.967015	1884	3	0.68136
C11orf63	11	4	0.55543	0.68344	1	12214	1	-0.037742	4	0.20826	0.37644	1	6534	2	1.0079	4	0.78551	0.7996	1	15706	0	0.1305	4	0.036861	0.096141	0.967015	1886	3	0.91644
AMY1B	1	4	0.094879	0.20919	1	3694	3	1.3049	4	0.12087	0.25401	1	4348	3	1.1848	4	0.32874	0.4863	1	8845	2	0.27298	4	0.036867	0.096149	0.967015	1887	3	0.93171
PELP1	17	4	0.74071	0.77228	1	14794	1	-0.81232	4	0.039163	0.10717	1	1863	1	-0.32186	4	0.18097	0.34814	1	6008	1	-1.7599	4	0.036894	0.096195	0.967015	1888	2	-1.555
ZNF780B	19	4	0.90857	0.90842	1	18041	0	0.056348	4	0.051829	0.13125	1	2305	2	0.38155	4	0.2297	0.39346	1	6948	2	0.73181	4	0.036934	0.096275	0.967015	1889	3	0.81681
GGCX	2	4	0.023303	0.073389	1	1325	2	-2.1699	4	0.2721	0.43544	1	7749	2	1.0766	4	0.069738	0.16408	1	2977	2	-1.3178	4	0.036978	0.096362	0.967015	1890	2	-0.88799
MEF2A	15	4	0.55909	0.68483	1	12251	1	-0.16544	4	0.089405	0.19972	1	3491	1	0.51548	4	0.81579	0.82187	1	16269	0	-0.18716	4	0.036987	0.096381	0.967015	1891	3	0.58351
RAB6A	11	4	0.23739	0.40233	1	6990	2	0.82498	4	0.21629	0.38388	1	6681	2	0.66508	4	0.60765	0.70267	1	12992	1	-1.118	4	0.037001	0.096412	0.967015	1892	2	0.4632
ZNF700	19	4	0.16248	0.32196	1	5454	2	1.0658	4	0.16714	0.32931	1	5641	3	0.92405	4	0.55639	0.68116	1	12426	1	0.6356	4	0.037041	0.096493	0.967015	1893	3	0.85116
PRRT2	16	4	0.0040105	0.014057	0.777107	358	4	1.8668	4	0.076427	0.17673	1	3097	2	0.96425	4	0.013021	0.042841	1	832	2	-2.477	4	0.037049	0.096508	0.967015	1894	1	-1.1326
DHCR7	11	4	0.13713	0.28101	1	4809	2	1.0865	4	0.053765	0.13498	1	2371	3	1.0816	4	0.055595	0.13767	1	2549	3	0.74997	4	0.037057	0.096519	0.967015	1895	2	-0.533
EAF2	3	4	0.35899	0.51543	1	9264	1	0.060769	4	0.073413	0.17129	1	3003	2	-1.7804	4	0.22338	0.38761	1	6830	1	-0.43062	4	0.037101	0.096615	0.967015	1896	2	-0.2881
C2orf57	2	4	0.31875	0.47796	1	8515	2	0.80725	4	0.011682	0.038741	1	739	2	1.2211	4	0.15409	0.30831	1	5346	2	0.6928	4	0.03718	0.096774	0.967015	1897	2	-0.48326
FOSL2	2	4	0.10777	0.23171	1	4046	3	1.358	4	0.72539	0.7642	1	14817	1	0.68633	4	0.88233	0.88204	1	17573	0	0.054989	4	0.037183	0.09678	0.967015	1898	3	0.99924
ZPR1	11	4	0.89443	0.89416	1	17747	0	0.28795	4	0.22111	0.38828	1	6779	2	0.82065	4	0.14292	0.29032	1	5007	3	0.93807	4	0.037245	0.096903	0.967015	1899	3	0.76154
SORCS1	10	4	0.0013872	0.004997	0.561376	177	2	0.71403	4	0.92348	0.9234	1	18411	0	-0.99749	4	0.28714	0.44707	1	8052	2	-0.57559	4	0.037257	0.096924	0.967015	1900	2	0.040809
TMEM192	4	4	0.0098572	0.033144	0.917399	721	2	0.91906	4	0.48895	0.63767	1	11548	2	0.86931	4	0.50146	0.64916	1	11678	2	0.64662	4	0.037281	0.096975	0.967015	1901	3	1.1406
SLC26A4	7	4	0.70131	0.75008	1	14200	1	0.038632	4	0.50958	0.65695	1	11890	1	0.20536	4	0.31179	0.4703	1	8519	1	-0.4052	4	0.037317	0.097066	0.967015	1902	3	0.43393
CCDC116	22	4	0.10973	0.23505	1	4091	1	0.0057602	4	0.23815	0.40401	1	7090	1	0.22508	4	0.15672	0.3126	1	5426	2	-0.72527	4	0.03736	0.097151	0.967015	1903	1	-1.2854
VSTM2B	19	4	0.0064722	0.022267	0.854745	522	2	0.90698	4	0.095938	0.21123	1	3678	2	-2.7668	4	0.010462	0.034998	1	691	4	1.1521	4	0.037412	0.09726	0.967015	1904	1	-1.3788
TMEM181	6	4	0.34189	0.49953	1	8954	2	0.27266	4	0.28927	0.45123	1	8093	2	0.54275	4	0.1027	0.22261	1	3894	3	0.94555	4	0.037457	0.097343	0.967015	1905	3	1.0523
LRP1B	2	4	0.13467	0.27685	1	4736	1	0.59543	4	0.17191	0.33683	1	5749	2	1.0885	4	0.89386	0.89357	1	17810	0	-0.08339	4	0.037463	0.09736	0.967015	1906	3	1.0033
SLC12A4	16	4	0.2854	0.44682	1	7887	1	0.5486	4	0.30562	0.46643	1	8443	2	0.50213	4	0.46918	0.61865	1	11160	1	-0.39357	4	0.037516	0.097459	0.967015	1907	2	-0.21223
PRDX2	19	4	0.0073071	0.02497	0.867933	576	2	1.3489	4	0.44848	0.59956	1	10876	2	0.45981	4	0.092387	0.20453	1	3598	3	1.3045	4	0.037539	0.09752	0.967015	1908	3	1.2114
NHLRC3	13	4	0.44764	0.59851	1	10605	2	0.82086	4	0.1264	0.26319	1	4504	2	1.0685	4	0.11368	0.24152	1	4178	3	1.0684	4	0.037601	0.097636	0.967015	1909	3	1.147
DDX59	1	4	0.051268	0.12993	1	2326	1	-2.3279	4	0.13287	0.27394	1	4682	2	0.93777	4	0.017542	0.056564	1	1047	3	1.2003	4	0.037619	0.097671	0.967015	1910	1	-2.2028
MIR1-1HG	20	4	0.20677	0.37401	1	6412	2	0.94311	4	0.41402	0.56731	1	10326	2	0.46192	4	0.49193	0.64016	1	11525	2	0.27579	4	0.037652	0.097746	0.967015	1911	3	0.72344
HMHB1	5	4	0.54784	0.68048	1	12121	1	-5.2237	4	0.27634	0.43936	1	7833	1	-1.7086	4	0.0078518	0.026751	0.990945	535	3	1.5465	4	0.037659	0.097756	0.967015	1912	1	-2.1982
BBS2	16	4	0.62653	0.71345	1	13159	1	-0.78858	4	0.0078381	0.026704	0.996519	536	1	-1.2147	4	0.02272	0.071692	1	1298	1	-3.1441	4	0.037671	0.09778	0.967015	1913	1	-1.9875
HIC1	17	4	0.049881	0.12731	1	2276	3	1.2008	4	0.31489	0.47507	1	8636	1	0.34223	4	0.34725	0.50355	1	9250	2	0.45389	4	0.037682	0.097799	0.967015	1914	3	0.93102
LRRC14B	5	4	0.52829	0.67311	1	11901	1	-0.47753	4	0.46734	0.61741	1	11187	2	0.57507	4	0.1211	0.25408	1	4380	2	0.43526	4	0.037701	0.09784	0.967015	1915	3	0.59854
FLNC	7	4	0.029097	0.08706	1	1532	2	1.3303	4	0.46398	0.61424	1	11139	2	0.57892	4	0.49396	0.64202	1	11558	2	0.093481	4	0.037707	0.097852	0.967015	1916	3	0.99373
CYBRD1	2	4	0.36188	0.51806	1	9310	2	0.7631	4	0.36153	0.51829	1	9564	2	0.63301	4	0.29982	0.45903	1	8296	2	0.72787	4	0.037708	0.097853	0.967015	1917	3	0.92356
IQUB	7	4	0.073098	0.17051	1	3030	3	1.3412	4	0.71693	0.75944	1	14667	1	-0.18374	4	0.012095	0.039999	1	782	2	0.52738	4	0.037775	0.097988	0.967015	1918	2	0.75501
THOC5	22	4	0.15221	0.30542	1	5183	2	-2.2707	4	0.26644	0.43016	1	7630	2	1.0092	4	0.024726	0.077465	1	1388	3	1.1196	4	0.037821	0.098094	0.967015	1919	2	-0.45342
LOC101928436	6	4	0.0018629	0.0066608	0.596403	224	1	-0.41323	4	0.12309	0.2577	1	4416	2	-1.6743	4	0.70833	0.75226	1	14406	1	-3.8286	4	0.037827	0.098102	0.967015	1920	1	-3.1785
STAT2	12	4	0.62286	0.71181	1	13115	1	0.24598	4	0.047107	0.12241	1	2153	3	1.2107	4	0.33596	0.49294	1	8995	2	0.70893	4	0.037845	0.098136	0.967015	1921	3	0.9086
FDFT1	8	4	0.70036	0.74962	1	14182	1	-0.49662	4	0.0085786	0.029109	1	575	4	1.5598	4	0.18599	0.35279	1	6125	2	0.39199	4	0.037851	0.09815	0.967015	1922	3	1.0413
ALAD	9	4	0.032246	0.093277	1	1664	2	0.74522	4	0.084365	0.19081	1	3330	2	1.079	4	0.38644	0.54018	1	9851	1	-0.11749	4	0.03793	0.098305	0.967015	1923	3	0.74321
RAB28	4	4	0.47825	0.62754	1	11093	2	0.6476	4	0.51365	0.66081	1	11954	1	0.66673	4	0.29484	0.45423	1	8192	1	0.23552	4	0.037964	0.098371	0.967015	1924	3	1.0858
NNAT	20	4	0.023823	0.074914	1	1348	2	-2.2646	4	0.087361	0.19614	1	3433	2	1.1384	4	0.14399	0.29204	1	5035	2	-0.18609	4	0.037982	0.098403	0.967015	1926	2	-0.88599
KNOP1	16	4	0.20212	0.36974	1	6324	2	0.60558	4	0.019938	0.063613	1	1146	4	1.8137	4	0.04743	0.12225	1	2229	1	0.66287	4	0.038034	0.098513	0.967015	1927	2	0.21264
BTLA	3	4	0.14875	0.2999	1	5092	2	0.87202	4	0.0077127	0.026286	0.9958	527	2	0.90286	4	0.33869	0.4955	1	9059	1	-0.061955	4	0.038036	0.098519	0.967015	1928	3	0.90052
TRIM62	1	4	0.93806	0.93809	1	18647	0	0.062582	4	0.019546	0.062498	1	1118	4	1.3568	4	0.84098	0.84263	1	16747	1	0.49977	4	0.038052	0.098561	0.967015	1929	3	0.86063
DENND3	8	4	0.00061315	0.002234	0.432073	104	1	-0.26737	4	0.94296	0.94297	1	18802	0	0.073268	4	0.76836	0.78807	1	15401	1	-1.6	4	0.038086	0.098633	0.967015	1930	1	-0.45
C15orf61	15	4	0.35542	0.51203	1	9208	1	0.20776	4	0.43967	0.59138	1	10735	1	-1.0956	4	0.52672	0.66972	1	12084	1	0.47319	4	0.038092	0.098643	0.967015	1931	2	0.20827
RGS19	20	4	0.023368	0.073581	1	1329	4	1.5025	4	0.087765	0.19685	1	3448	2	1.2091	4	0.148	0.29857	1	5148	2	-1.1138	4	0.038115	0.098694	0.967015	1932	2	0.86093
EIF4E1B	5	4	0.22905	0.39453	1	6834	2	0.87667	4	0.12518	0.26116	1	4462	2	1.0654	4	0.37779	0.53198	1	9710	2	0.57002	4	0.038149	0.098762	0.967015	1933	3	0.78123
POLR2J3	7	4	0.014014	0.045881	1	906	2	1.2492	4	0.26664	0.43034	1	7634	1	-2.5404	4	0.0088951	0.030134	1	591	3	1.3905	4	0.038189	0.098842	0.967015	1934	2	-0.2971
MIPOL1	14	4	0.65239	0.72548	1	13499	1	-0.02415	4	0.0011021	0.0039869	0.581986	136	3	2.4021	4	0.17084	0.33517	1	5772	1	-0.72063	4	0.038241	0.09894	0.967015	1935	2	-0.12434
FRYL	4	4	0.7183	0.75932	1	14443	1	-0.73102	4	0.014337	0.046874	1	874	4	1.2129	4	0.411	0.56351	1	10232	2	0.48279	4	0.03826	0.098982	0.967015	1936	3	0.60544
TM2D3	15	4	0.29717	0.45774	1	8112	1	0.29496	4	0.58407	0.69637	1	12864	1	-0.12157	4	0.15596	0.31135	1	5406	3	0.85803	4	0.038273	0.09901	0.967015	1937	3	0.79934
IGFBP5	2	4	0.4629	0.61297	1	10840	2	0.35448	4	0.060722	0.14791	1	2611	2	1.1857	4	0.73259	0.76604	1	14798	1	-0.67402	4	0.038336	0.099134	0.967015	1938	3	0.86294
NOXRED1	14	4	0.48285	0.6318	1	11173	2	0.81689	4	0.4739	0.62359	1	11285	1	-0.22418	4	0.11095	0.23694	1	4108	3	0.97373	4	0.038387	0.099231	0.967015	1939	3	0.90463
ZNF837	19	4	0.054714	0.13649	1	2435	3	1.3177	4	0.25841	0.42273	1	7460	2	0.80905	4	0.25889	0.42074	1	7483	2	0.974	4	0.038396	0.099245	0.967015	1940	2	0.48525
EFHD1	2	4	0.57085	0.68958	1	12402	1	0.56328	4	0.29659	0.45796	1	8258	2	0.98319	4	0.02494	0.078081	1	1397	3	1.2542	4	0.038398	0.099249	0.967015	1941	2	0.76095
VCPKMT	14	4	0.040074	0.10866	1	1939	3	1.4839	4	0.34551	0.50353	1	9297	1	-0.12235	4	0.060493	0.14683	1	2695	2	0.76729	4	0.03841	0.099272	0.967015	1942	3	1.2878
MTCH2	11	4	0.4646	0.61459	1	10864	2	0.61096	4	0.062168	0.15064	1	2668	2	0.74342	4	0.68584	0.74017	1	14066	1	0.43855	4	0.038433	0.099307	0.967015	1943	3	1.0032
WSCD1	17	4	0.013328	0.043779	0.996388	876	3	1.0634	4	0.54959	0.68264	1	12442	1	0.17427	4	0.19528	0.3615	1	6297	2	0.79913	4	0.038448	0.099351	0.967015	1944	2	0.55133
ZMYM1	1	4	0.055364	0.13768	1	2453	3	1.3335	4	0.09986	0.21813	1	3773	2	0.1842	4	0.050827	0.12865	1	2361	2	0.38961	4	0.0385	0.099449	0.967015	1945	2	-0.77465
AGMAT	1	4	0.95451	0.95457	1	18989	0	-0.55193	4	0.2423	0.4078	1	7178	2	0.027173	4	0.02779	0.083892	1	1511	3	1.1231	4	0.038518	0.099489	0.967015	1946	3	0.5792
PRSS2	7	4	0.077976	0.17931	1	3171	3	1.423	4	0.01001	0.033623	1	644	3	2.2498	4	0.46725	0.61682	1	11125	2	-0.42697	4	0.038558	0.099572	0.967015	1947	3	1.2091
APOBEC3B	22	4	0.80107	0.81164	1	15899	0	-0.050027	4	0.59561	0.70123	1	13004	1	0.093143	4	0.022702	0.071638	1	1295	3	1.327	4	0.03858	0.09962	0.967015	1948	2	0.010637
CILP	15	4	0.60119	0.70229	1	12810	1	0.22215	4	0.15258	0.30607	1	5247	3	1.2642	4	0.21427	0.37919	1	6661	2	-0.758	4	0.038603	0.09967	0.967015	1949	2	0.69815
SERPINB4	18	4	0.25956	0.4229	1	7399	2	-0.21662	4	0.037031	0.10297	1	1791	1	-4.056	4	0.22127	0.38565	1	6795	1	-3.3692	4	0.038604	0.09967	0.967015	1950	1	-2.6685
PSTK	10	4	0.34775	0.50501	1	9062	2	0.62359	4	0.49584	0.64408	1	11650	2	0.39044	4	0.92986	0.92977	1	18576	0	-0.025048	4	0.038615	0.099695	0.967015	1951	3	0.72285
STEAP1B	7	4	0.17042	0.33452	1	5638	1	-0.43231	4	0.15653	0.3124	1	5361	2	0.56527	4	0.31744	0.47558	1	8634	1	-0.47161	4	0.038655	0.099771	0.967015	1953	2	0.11146
NTN5	19	4	0.0016137	0.0057797	0.572672	203	3	1.8911	4	0.14368	0.29171	1	5007	3	1.2928	4	0.2939	0.45338	1	8170	2	0.70683	4	0.038717	0.099905	0.967015	1955	2	0.59113
LAMP2	X	4	0.016492	0.053454	1	1016	2	0.17537	4	0.12101	0.25423	1	4353	3	1.1662	4	0.060224	0.14633	1	2681	2	-0.164	4	0.038742	0.099966	0.967015	1956	3	0.87999
CLEC2B	12	4	0.40597	0.55938	1	9964	1	-1.1342	4	0.0097819	0.032908	1	632	4	1.4673	4	0.51269	0.6598	1	11863	1	-0.74879	4	0.038751	0.099981	0.967015	1957	2	0.22242
SLC25A13	7	4	0.23531	0.4004	1	6941	2	-1.1099	4	0.39801	0.55229	1	10088	2	-1.0731	4	0.089866	0.20003	1	3530	3	1.1717	4	0.038759	0.099998	0.967015	1958	2	-0.20778
TBL1XR1	3	4	0.053602	0.13439	1	2406	1	-3.8644	4	0.13216	0.27278	1	4669	1	-1.6638	4	0.44252	0.59331	1	10727	1	-3.4984	4	0.038789	0.10005	0.967015	1959	1	-3.9006
FAM122A	9	4	0.86463	0.86457	1	17116	1	-0.56282	4	0.18892	0.35859	1	6144	2	0.55797	4	0.011074	0.036906	1	725	4	1.5151	4	0.0388	0.10007	0.967015	1960	3	0.76516
FER1L6	8	4	0.87798	0.87764	1	17404	0	0.13355	4	0.1746	0.34106	1	5806	1	0.40692	4	0.28093	0.44138	1	7936	2	0.26313	4	0.038806	0.10008	0.967015	1961	3	0.65251
DAG1	3	4	0.27043	0.43295	1	7609	1	0.21914	4	0.51827	0.66518	1	12029	2	-0.58544	4	0.065232	0.15579	1	2832	2	1.0369	4	0.038811	0.10009	0.967015	1962	1	-0.4478
BCL2L15	1	4	0.19241	0.36071	1	6140	2	0.81427	4	0.12519	0.26118	1	4463	2	1.0637	4	0.80332	0.81244	1	16027	1	0.26219	4	0.038838	0.10015	0.967015	1963	3	1.1582
KNG1	3	4	0.009694	0.032633	0.917399	709	3	1.7052	4	0.0249	0.077963	1	1369	2	0.88211	4	0.4116	0.56406	1	10242	1	-0.95632	4	0.038844	0.10016	0.967015	1964	3	1.1866
MYH2	17	4	0.39286	0.54695	1	9763	2	-0.24406	4	0.26166	0.42574	1	7540	2	0.75687	4	0.21504	0.37991	1	6676	1	-0.7022	4	0.038863	0.10019	0.967015	1965	2	0.17582
ALX3	1	4	0.221	0.38714	1	6681	2	0.20148	4	0.9134	0.9133	1	18210	0	0.30596	4	0.054124	0.13496	1	2497	1	0.089252	4	0.038888	0.10024	0.967015	1966	2	-0.24225
OLIG3	6	4	0.48613	0.63492	1	11227	2	0.13101	4	0.51718	0.66418	1	12008	2	0.48227	4	0.016586	0.053711	1	1010	2	1.1183	4	0.0389	0.10027	0.967015	1967	3	0.99449
FA2H	16	4	0.029292	0.087446	1	1544	3	1.5419	4	0.52256	0.66924	1	12099	1	-0.19762	4	0.317	0.47516	1	8626	1	-1.5713	4	0.038923	0.10032	0.967015	1968	2	0.49062
BTG2	1	4	0.33609	0.49411	1	8843	2	0.20874	4	0.64769	0.72448	1	13675	1	0.6912	4	0.88334	0.88305	1	17593	0	0.29741	4	0.038945	0.10037	0.967015	1969	3	0.85756
LOC643355	10	4	0.37134	0.52683	1	9445	2	0.79725	4	0.31626	0.47634	1	8665	1	0.032586	4	0.055946	0.13833	1	2560	3	1.1077	4	0.038953	0.10039	0.967015	1970	3	0.93559
SLC22A1	6	4	0.88618	0.88583	1	17577	0	0.045287	4	0.17687	0.34458	1	5862	3	0.9322	4	0.36464	0.51973	1	9514	2	0.16077	4	0.039017	0.10053	0.967015	1971	3	0.84283
METTL7B	12	4	0.050259	0.12803	1	2289	3	1.5005	4	0.27287	0.43617	1	7764	2	-1.3609	4	0.050732	0.12845	1	2359	3	0.9683	4	0.039018	0.10054	0.967015	1972	2	0.5592
P2RX5	17	4	0.24408	0.40846	1	7124	1	0.73733	4	0.30863	0.4692	1	8497	1	-2.4952	4	0.066248	0.15764	1	2870	1	-0.99379	4	0.039023	0.10055	0.967015	1973	1	-1.5703
GLRX3	10	4	0.12199	0.25575	1	4408	1	0.17665	4	0.78206	0.79881	1	15735	1	-0.56411	4	0.28998	0.44975	1	8098	2	0.60773	4	0.039045	0.10059	0.967015	1974	3	0.57103
BTBD18	11	4	0.19959	0.36735	1	6272	2	0.9524	4	0.89741	0.89721	1	17885	0	0.46732	4	0.14875	0.29979	1	5177	2	0.8456	4	0.039049	0.1006	0.967015	1975	3	0.99062
PTGES	9	4	0.34543	0.50282	1	9012	2	0.82973	4	0.38543	0.54046	1	9894	2	0.88214	4	0.29757	0.45684	1	8250	2	0.73082	4	0.039055	0.10061	0.967015	1976	3	1.2827
ATE1	10	4	0.17185	0.33672	1	5677	3	0.99905	4	0.75713	0.7829	1	15329	1	0.16075	4	0.84954	0.85025	1	16902	1	-0.15218	4	0.039061	0.10062	0.967015	1977	3	0.70948
IPP	1	4	0.019545	0.062495	1	1133	1	-2.9482	4	0.23547	0.40155	1	7047	2	0.77824	4	0.28653	0.44652	1	8038	2	0.058575	4	0.039062	0.10063	0.967015	1978	1	-1.2989
MAPRE1	20	4	0.0010866	0.0039298	0.542063	144	4	1.8697	4	0.1866	0.35647	1	6099	1	-1.0537	4	0.12593	0.26213	1	4527	1	-1.999	4	0.03907	0.10064	0.967015	1979	2	-0.1274
LY86	6	4	0.057223	0.14115	1	2519	3	1.2176	4	0.94856	0.94858	1	18915	0	-0.35307	4	0.46911	0.61858	1	11158	2	0.36706	4	0.039081	0.10066	0.967015	1980	3	0.66659
FPR1	19	4	0.023617	0.074329	1	1341	2	1.2624	4	0.13914	0.28441	1	4872	3	1.3445	4	0.14631	0.29583	1	5088	2	0.59303	4	0.039151	0.10079	0.967015	1981	3	1.2308
STRADB	2	4	0.86478	0.8647	1	17122	1	0.49651	4	0.16127	0.32003	1	5483	2	0.93587	4	0.31271	0.47117	1	8538	2	0.72106	4	0.039151	0.10079	0.967015	1982	3	0.86727
NT5C1B-RDH14	2	4	0.19477	0.36293	1	6180	1	0.0025539	4	0.037438	0.10377	1	1804	3	1.2193	4	0.019583	0.062601	1	1138	3	1.1666	4	0.039163	0.10081	0.967015	1983	2	-0.75715
BLK	8	4	0.0014036	0.005059	0.561376	180	1	-3.3087	4	0.82128	0.82722	1	16432	0	0.44075	4	0.36382	0.51896	1	9502	1	0.19507	4	0.039218	0.10092	0.967015	1984	1	-1.1332
GSTO2	10	4	0.43324	0.58507	1	10399	2	0.6117	4	0.22678	0.39351	1	6879	2	0.5596	4	0.95989	0.95999	1	19180	0	-0.13593	4	0.039247	0.10097	0.967015	1985	3	0.7884
ARSK	5	4	0.89396	0.89368	1	17736	0	0.067316	4	0.50692	0.65446	1	11845	2	0.47289	4	0.45799	0.60794	1	10976	2	0.53673	4	0.039255	0.10098	0.967015	1986	2	0.50824
SLC18A2	10	4	0.3953	0.54929	1	9805	2	0.14565	4	0.021906	0.069376	1	1236	1	0.57636	4	0.030519	0.08931	1	1618	3	1.4565	4	0.039312	0.10111	0.967015	1987	2	0.72561
FITM2	20	4	0.64149	0.72039	1	13349	1	0.20098	4	0.81977	0.82601	1	16405	0	-0.79102	4	0.042883	0.11361	1	2079	2	1.0184	4	0.039313	0.10111	0.967015	1988	3	0.51084
UAP1	1	4	0.8434	0.84515	1	16678	1	0.18285	4	0.15974	0.31757	1	5437	3	1.1341	4	0.25734	0.4193	1	7456	2	0.10607	4	0.03935	0.10118	0.967015	1989	3	0.84686
C14orf142	14	4	0.61989	0.71047	1	13062	1	0.21313	4	0.68925	0.74474	1	14251	1	0.4718	4	0.050319	0.12768	1	2338	3	0.78697	4	0.039369	0.10121	0.967015	1990	3	0.71389
PRIMA1	14	4	0.42316	0.5756	1	10239	1	0.31035	4	0.65729	0.72896	1	13814	1	0.37391	4	0.13268	0.27338	1	4717	3	0.76453	4	0.039389	0.10124	0.967015	1991	3	0.83211
BRSK1	19	4	0.87337	0.87305	1	17315	0	0.18112	4	0.03167	0.092437	1	1607	2	0.5657	4	0.090924	0.20189	1	3555	3	1.0558	4	0.039395	0.10126	0.967015	1992	3	0.84585
RSPH9	6	4	0.091543	0.20331	1	3600	3	1.1428	4	0.018509	0.0594	1	1073	3	1.3388	4	0.75024	0.77671	1	15080	1	-0.79691	4	0.039404	0.10128	0.967015	1993	3	0.86579
GPR137B	1	4	0.05379	0.13477	1	2414	2	-2.4023	4	0.060621	0.14774	1	2607	1	-3.0798	4	0.020669	0.065771	1	1200	3	1.3253	4	0.039413	0.1013	0.967015	1994	1	-1.7728
STARD7	2	4	0.063164	0.15224	1	2720	2	0.56345	4	0.2996	0.46085	1	8328	2	0.55832	4	0.014917	0.048629	1	928	4	1.0685	4	0.039535	0.10154	0.968636	1995	3	0.95222
MIDN	19	4	0.58636	0.69596	1	12612	1	0.32509	4	0.1437	0.29174	1	5008	2	0.96369	4	0.26175	0.42341	1	7557	2	0.73852	4	0.039575	0.10163	0.968636	1996	3	0.85692
HENMT1	1	4	0.88899	0.88863	1	17624	0	0.20746	4	0.31645	0.47652	1	8673	2	0.83629	4	0.32039	0.47834	1	8690	2	0.46201	4	0.039576	0.10163	0.968636	1997	3	0.89483
GKN2	2	4	0.15997	0.3179	1	5398	2	0.44086	4	0.74677	0.77668	1	15160	1	-0.35491	4	0.022981	0.072429	1	1309	2	0.82081	4	0.039608	0.10169	0.968636	1998	3	0.76507
C1QTNF9B	10	4	0.078863	0.1809	1	3206	1	-2.6911	4	0.41616	0.56935	1	10353	1	0.19762	4	0.023984	0.075375	1	1358	4	1.4322	4	0.039639	0.10175	0.968636	1999	2	-0.26248
BEST3	12	4	0.15365	0.30772	1	5227	2	0.81195	4	0.17904	0.34801	1	5924	3	0.99642	4	0.29569	0.45503	1	8207	1	-0.12039	4	0.03964	0.10176	0.968636	2000	3	0.90207
TMBIM6	12	4	0.1712	0.33573	1	5663	1	-2.1382	4	0.011769	0.039002	1	747	3	1.5347	4	0.39752	0.55067	1	10011	1	-2.2698	4	0.039724	0.10193	0.968659	2001	2	-1.1981
BAIAP2L1	7	4	0.45104	0.60174	1	10664	2	0.13646	4	0.23265	0.39889	1	6987	2	0.95594	4	0.13238	0.2729	1	4708	3	0.7422	4	0.039738	0.10196	0.968659	2002	3	0.94695
CLSTN1	1	4	0.83819	0.84061	1	16589	0	0.55635	4	0.94468	0.94469	1	18832	0	-0.45362	4	0.63354	0.71447	1	13349	1	-0.14547	4	0.03974	0.10196	0.968659	2003	3	0.33197
POU4F3	5	4	0.52173	0.66842	1	11804	2	0.63238	4	0.224	0.39092	1	6836	1	0.6725	4	0.73372	0.76668	1	14820	1	-0.27341	4	0.039743	0.10196	0.968659	2004	3	0.66689
GBF1	10	4	0.0034285	0.012043	0.740144	326	3	1.848	4	0.48556	0.63452	1	11475	1	0.41651	4	0.27586	0.43665	1	7824	1	-1.7258	4	0.039761	0.102	0.968659	2005	2	0.37393
ZNF749	19	4	0.10015	0.21848	1	3838	2	0.55769	4	0.38432	0.53942	1	9878	1	-0.57904	4	0.037745	0.10357	1	1889	3	1.3169	4	0.039846	0.10217	0.969487	2006	3	0.50714
TEN1	17	4	0.41396	0.56687	1	10084	2	0.43865	4	0.078776	0.18096	1	3175	3	1.4692	4	0.12439	0.25959	1	4483	2	0.36176	4	0.039853	0.10218	0.969487	2007	3	0.90909
GRAPL	17	4	0.019155	0.061318	1	1117	2	0.40176	4	0.63897	0.72037	1	13555	1	-0.26942	4	0.022646	0.071481	1	1292	4	1.2038	4	0.039888	0.10226	0.969749	2008	3	0.80131
OR4S1	11	4	0.12312	0.25766	1	4436	3	1.1179	4	0.82154	0.8274	1	16436	1	-0.10362	4	0.47343	0.62269	1	11231	2	0.31199	4	0.039946	0.10237	0.970043	2009	3	0.6984
CYP27B1	12	4	0.44146	0.59276	1	10518	2	0.82359	4	0.51457	0.6617	1	11966	2	0.47732	4	0.022294	0.070488	1	1276	3	1.5686	4	0.039969	0.10242	0.970043	2010	3	1.1798
PTPRE	10	4	0.072656	0.1697	1	3012	2	0.19036	4	0.21106	0.37905	1	6586	2	0.37241	4	0.13791	0.2822	1	4863	3	0.91289	4	0.040001	0.10248	0.970043	2011	3	0.52769
TCEB3	1	4	0.20731	0.37448	1	6424	2	0.58732	4	0.39385	0.54834	1	10026	2	0.8179	4	0.052101	0.13105	1	2417	3	1.4261	4	0.040002	0.10248	0.970043	2012	3	0.88729
PSMB6	17	4	0.027784	0.084433	1	1496	3	1.3865	4	0.094955	0.2095	1	3654	2	-0.19975	4	0.39799	0.55114	1	10018	1	0.30085	4	0.040038	0.10256	0.970081	2013	2	-0.24876
TRERF1	6	4	0.70081	0.74985	1	14190	1	-0.021197	4	0.31877	0.47868	1	8727	2	0.77948	4	0.34315	0.49967	1	9161	2	0.52443	4	0.040048	0.10258	0.970081	2014	3	0.69885
CHM	X	4	0.52397	0.67059	1	11847	2	0.49849	4	0.2641	0.42799	1	7589	2	0.41763	4	0.90579	0.90561	1	18062	0	0.45992	4	0.040132	0.10276	0.971315	2016	3	0.77191
XYLB	3	4	0.89475	0.8945	1	17756	0	-0.29412	4	0.25266	0.41738	1	7358	2	0.58424	4	0.42569	0.57741	1	10463	1	-0.19548	4	0.040254	0.10301	0.971315	2017	3	0.36196
ACTL9	19	4	0.17193	0.33685	1	5679	1	-0.17207	4	0.27094	0.43431	1	7724	1	-3.0766	4	0.34225	0.49886	1	9145	1	-1.1804	4	0.040308	0.10312	0.971315	2018	2	-1.6645
TEX14	17	4	0.11151	0.23813	1	4133	2	0.83027	4	0.11803	0.24926	1	4277	3	1.0377	4	0.13485	0.27704	1	4779	2	-1.2105	4	0.040311	0.10312	0.971315	2019	1	-1.4497
UBE2R2	9	4	0.38875	0.5431	1	9696	1	-0.21927	4	0.04628	0.12084	1	2121	3	1.3578	4	0.4084	0.56102	1	10184	1	0.1437	4	0.040328	0.10315	0.971315	2020	3	0.88325
SPNS3	17	4	0.67481	0.73638	1	13828	1	-0.80581	4	0.023856	0.075017	1	1325	4	1.3759	4	0.0036371	0.012772	0.84983	298	3	1.8002	4	0.040373	0.10324	0.971315	2021	3	1.1403
GSTK1	7	4	0.088827	0.19854	1	3518	2	1.0353	4	0.94258	0.94258	1	18788	0	-0.063165	4	0.74299	0.77227	1	14976	1	0.3557	4	0.040406	0.1033	0.971315	2022	3	0.66712
RSPH14	22	4	0.015469	0.050355	1	962	1	-5.5211	4	0.24303	0.40848	1	7192	1	-4.6921	4	0.053673	0.1341	1	2481	3	0.88591	4	0.040425	0.10333	0.971315	2023	1	-4.183
C11orf31	11	4	0.10745	0.23115	1	4037	2	-1.003	4	0.31046	0.47098	1	8531	2	0.88659	4	0.069501	0.16366	1	2967	1	-0.2986	4	0.040439	0.10336	0.971315	2024	2	-0.063155
SHFM1	7	4	0.077323	0.17812	1	3153	2	0.4839	4	0.16133	0.32013	1	5486	3	0.97816	4	0.34674	0.50306	1	9235	1	-0.092644	4	0.040455	0.10339	0.971315	2025	2	0.7879
ASB7	15	4	0.048503	0.12467	1	2216	2	0.53165	4	0.13675	0.28047	1	4792	2	0.35244	4	0.48176	0.63054	1	11356	1	0.065163	4	0.040513	0.10351	0.971315	2026	3	0.7293
SYT12	11	4	0.10438	0.22576	1	3956	1	-1.0171	4	0.0017914	0.0064162	0.672277	188	4	2.2772	4	0.01083	0.036158	1	712	3	1.3828	4	0.040518	0.10352	0.971315	2027	2	-0.1997
ELP3	8	4	0.04892	0.12548	1	2242	2	-1.9788	4	0.008355	0.028377	1	564	1	0.77523	4	0.14	0.28559	1	4919	2	1.0889	4	0.040542	0.10356	0.971315	2028	2	-0.1805
SPRR2A	1	4	0.57462	0.69116	1	12452	1	0.19036	4	0.40488	0.55874	1	10181	1	-1.0678	4	0.17513	0.34185	1	5893	2	0.64485	4	0.04056	0.1036	0.971315	2029	2	0.058182
THAP3	1	4	0.5162	0.66324	1	11706	2	0.4418	4	0.037489	0.10387	1	1805	3	1.3658	4	0.48646	0.63503	1	11428	2	-0.24918	4	0.040563	0.1036	0.971315	2030	3	0.72777
LEUTX	19	4	0.043376	0.11505	1	2044	3	1.3384	4	0.096429	0.21207	1	3689	1	-0.51563	4	0.37298	0.52753	1	9638	1	0.056678	4	0.04057	0.10361	0.971315	2031	2	0.2136
TMEM67	8	4	0.15488	0.3097	1	5261	3	1.073	4	0.014149	0.04629	1	862	2	-0.39824	4	0.82206	0.82685	1	16383	0	0.050984	4	0.040595	0.10366	0.971315	2032	2	-0.59984
PEMT	17	4	0.0026483	0.0093765	0.684442	275	3	1.836	4	0.14332	0.29114	1	4995	3	1.1833	4	0.31505	0.47332	1	8594	1	0.28063	4	0.040622	0.10372	0.971315	2035	3	1.0274
ZNF775	7	4	0.12641	0.26312	1	4531	1	0.082085	4	0.0064109	0.022069	0.964983	456	3	1.9449	4	0.050575	0.12816	1	2351	3	0.95889	4	0.040668	0.10381	0.971315	2036	3	1.2607
CCDC124	19	4	0.41379	0.56671	1	10079	1	0.16001	4	0.011193	0.037265	1	710	3	1.7265	4	0.13879	0.28361	1	4880	2	0.82413	4	0.040673	0.10382	0.971315	2037	3	1.0298
MED6	14	4	0.022468	0.070955	1	1278	3	1.3418	4	0.27534	0.43843	1	7810	2	1.0961	4	0.013207	0.043408	1	842	2	1.0188	4	0.040723	0.10392	0.971315	2038	2	0.41003
ST6GALNAC1	17	4	0.15106	0.30361	1	5161	1	-5.7458	4	0.020318	0.064725	1	1163	2	1.2351	4	0.13504	0.27737	1	4784	1	-2.5357	4	0.040725	0.10393	0.971315	2039	1	-4.5491
SEPW1	2	4	0.0098226	0.033037	0.917399	718	3	1.6064	4	0.1716	0.33637	1	5743	3	1.3211	4	0.04091	0.10976	1	2021	2	-0.80197	4	0.040758	0.104	0.971315	2040	2	0.83747
CHD7	8	4	0.0014989	0.0053898	0.563923	192	2	-0.36688	4	0.31121	0.47168	1	8551	1	-1.4632	4	0.04496	0.11759	1	2144	2	1.2354	4	0.040777	0.10403	0.971315	2041	1	-1.5131
ABCB6	2	4	0.078911	0.18099	1	3207	2	1.159	4	0.69362	0.747	1	14318	1	-1.4517	4	0.015324	0.049905	1	948	3	1.635	4	0.040805	0.10408	0.971315	2042	3	0.83125
SCAF1	19	4	0.053775	0.13473	1	2412	1	-2.3859	4	0.027662	0.08451	1	1477	2	1.3412	4	0.0067318	0.023103	0.97617	468	3	1.8081	4	0.040828	0.10413	0.971315	2043	2	0.16872
NCK2	2	4	0.38872	0.54308	1	9695	1	0.3594	4	0.93602	0.93601	1	18656	0	-0.78221	4	0.036333	0.10082	1	1844	3	1.5323	4	0.040871	0.10422	0.971315	2044	3	0.87464
AHR	7	4	0.2869	0.4482	1	7918	1	-0.12677	4	0.88669	0.88633	1	17678	0	-0.313	4	0.79959	0.80974	1	15968	1	0.52677	4	0.040878	0.10423	0.971315	2045	3	0.58526
HNRNPA1	12	4	0.43506	0.58674	1	10425	1	-0.81834	4	0.059541	0.14574	1	2573	1	-2.7131	4	0.0001571	0.00058208	0.27876	42	3	2.231	4	0.040932	0.10434	0.971315	2046	1	-2.6685
CENPM	22	4	0.084218	0.19037	1	3365	2	-1.1246	4	0.2628	0.42678	1	7565	1	-2.0471	4	0.57257	0.68773	1	12598	1	-3.1344	4	0.041047	0.10457	0.971315	2047	2	-1.819
FAM35A	1	4	0.94268	0.9427	1	18737	0	0.15279	4	0.10175	0.2214	1	3822	2	1.0504	4	0.11887	0.25036	1	4309	3	0.91017	4	0.041049	0.10457	0.971315	2048	3	1.0168
USP2	11	4	0.26936	0.43194	1	7590	2	0.69413	4	0.39976	0.55399	1	10116	2	0.44179	4	0.30536	0.46422	1	8402	2	0.33839	4	0.04105	0.10457	0.971315	2049	3	0.83648
LEFTY1	1	4	0.16847	0.33143	1	5594	1	-2.1005	4	0.1818	0.35208	1	6004	2	-0.27459	4	0.10976	0.23486	1	4075	2	-1.8897	4	0.041085	0.10465	0.971315	2050	2	-1.161
FBXL6	8	4	0.91188	0.9118	1	18101	0	-0.047199	4	0.075473	0.175	1	3062	3	1.3921	4	0.34912	0.50525	1	9288	2	0.89332	4	0.041089	0.10466	0.971315	2051	3	0.934
PSMD2	3	4	0.025752	0.080281	1	1426	1	-2.9993	4	0.68489	0.74248	1	14186	1	-0.24807	4	0.01571	0.051093	1	967	1	-1.2747	4	0.041139	0.10476	0.971315	2052	1	-2.0518
ZNF343	20	4	0.27593	0.43814	1	7715	2	0.56668	4	0.29946	0.46072	1	8325	2	0.30017	4	0.71825	0.75773	1	14572	1	-0.46956	4	0.041177	0.10483	0.971315	2053	3	0.49286
TMEM243	7	4	0.23761	0.40253	1	6994	2	0.60707	4	0.016695	0.054037	1	992	3	1.778	4	0.83568	0.8381	1	16650	1	0.19579	4	0.041194	0.10488	0.971315	2054	3	0.92707
NATD1	17	4	0.0008833	0.0031895	0.509154	126	2	-1.3909	4	0.26423	0.42811	1	7591	1	-2.3144	4	0.036775	0.10167	1	1858	3	1.4106	4	0.041242	0.10496	0.971315	2055	2	-0.93972
GABBR1	6	4	0.1359	0.27894	1	4772	1	-0.59046	4	0.042377	0.1134	1	1988	1	-1.0385	4	0.51885	0.6657	1	11965	1	-3.286	4	0.041281	0.10503	0.971315	2056	1	-2.0429
TMEM99	17	4	0.022164	0.070102	1	1261	2	-1.1721	4	0.13716	0.28113	1	4804	2	-1.6992	4	0.18041	0.34764	1	5989	1	-2.6046	4	0.041339	0.10516	0.971315	2057	2	-1.4415
KCNV2	9	4	0.22645	0.39218	1	6778	1	-1.275	4	0.24002	0.40574	1	7132	2	0.25838	4	0.30778	0.46644	1	8442	1	-1.5634	4	0.041345	0.10517	0.971315	2058	2	-0.41046
TMEM242	6	4	0.13765	0.28185	1	4822	3	0.98198	4	0.10358	0.22451	1	3884	3	1.1634	4	0.86302	0.86294	1	17183	1	-0.50481	4	0.041378	0.10524	0.971315	2059	3	0.78327
[truncated: 18,116 more rows]
