# Supplementary material for: SAM homeostasis is regulated by CFIm-mediated splicing of MAT2A
Source: bioRxiv preprint, doi:10.1101/2020.11.12.380626, version 1 (2020-11-12)
Supplement: Table S2 [file 380626_file17.xlsx]

## Sheet: Description
Analysis of Poly(A)-Click-Seq of HCT116 and 116-dDI with either siNT or siCFIm25 treatment.
Comparisons of gene expression/poly(A) site usage between samples shown as title of excel pages.
Samples and columns of excel sheets described below.
Samples	Cell Line	Knockdown
HCT116-NT	HCT116	siNT
HCT116-CFIm25	HCT116	siCFIm25
116-dDI-NT	116-ΔDI	siNT
116-dDI-CFIm25	116-ΔDI	siCFIm25
Columns				Description
Gene Name				Gene being analyzed for that specific row
Mean Counts Cond1				Number of reads mapped for condition 1 (ex. HCT116-NT)
Mean Counts Cond2				Number of reads mapped for condition 2 (ex. HCT116-CFIm25)
Fold Change				Fold change. Shows up/down regulation of gene
pAdj				Independent p-value for gene expression
DE Result				Differential expression of the gene ("NC", no change. "Up"/"Down", up/down regulated)
Any Splicing APA?				Differential 3' exon usage
Any Tandem APA?				Differential APA within the same 3'UTR/exon/intron
#Exons with a PAC				Number of exons with a poly(A) cluster
Exon Names				Chromosome annotations of exons with poly(A) cluster
Exon fraction Cond1				If "#Exons with a PAC" > 1, then percent exon usage for condition 1.
Exon fraction Cond2				Same as above, but condition 2
Exon Fraction Change				Ratio of exon usage between samples (1 = no difference between samples)
Exon Results_x000D_ (NA = Not significant)				Differential exon expression (up/down regulated)
#PACs per Exon				Number of poly(A) clusters within the given exon
PDU per Exon Cond1				Percent distal usage for condition 1. 0 = 100% proximal poly(A) site usage. 1 = 100% distal poly(A) site. Poly(A) sites weighed based on distance apart if more than 2 poly(A) sites.
PDU per Exon Cond2				Same as above, but condition 2
delta-PDUI per Exon				Change in percent usage. (PDU per Exon Cond2) - (PDU per Exon Cond1).
DPAC Result				If Differential Poly(A) Cluster (DPAC) detects significant change in poly(A) site usage between treatment groups, listed as Lengthening, Shortening, or Both dependent on type of APA change.
Links to USCS Gene Browser (one link per cell):				Link to the exon data to be loaded into UCSC

## Sheet: HCT116-NT_vs_HCT116-CFIm25
Gene Name	Mean Counts Cond1	Mean Counts Cond2	Fold Change	pAdj	DE Result	Any Splicing APA?	Any Tandem APA?	#Exons with a PAC	Exon Names	Exon fraction Cond1	Exon fraction Cond2	Exon Fraction Change	Exon Results_x000D_ (NA = Not significant)	#PACs per Exon	PDU per Exon Cond1	PDU per Exon Cond2	delta-PDUI per Exon	DPAC Result	Links to USCS Gene Browser (one link per cell):
TPT1	1.5524	190.956	6.98973	NA	NC	No	No	1	TPT1_exon_chr13:45913737	1	1	0	NA	1	1	1	1	NA	TPT1_exon_chr13:45913737
SETSIP	0	17.8995	6.6284	0	UP	No	No	1	SETSIP_exon_chr1:92541029	1	1	0	NA	1	1	1	1	NA	SETSIP_exon_chr1:92541029
SHLD2P1	0.2548	25.6463	6.1946	0	UP	No	No	1	SHLD2P1_exon_chr10:46938167	1	1	0	NA	1	1	1	1	NA	SHLD2P1_exon_chr10:46938167
NEK10	0	13.0413	6.1817	0.0002	UP	No	No	1	NEK10_exon_chr3:27152811	1	1	0	NA	1	1	1	1	NA	NEK10_exon_chr3:27152811
IPP	0.3881	22.0867	5.9705	0.0002	UP	No	No	2	IPP_exon_chr1:46165862_x000D_ IPP_exon_chr1:46182689	0.0_x000D_ 1.0	0.7465_x000D_ 0.2535	0.7465_x000D_ -0.7465	Up_x000D_ NA	2_x000D_ 1	NA_x000D_ 1.0	NA_x000D_ 1.0	NA_x000D_ 1.0	NA_x000D_ NA	IPP_exon_chr1:46165862	IPP_exon_chr1:46182689
SYDE2	0	10.4782	5.8632	0.0012	UP	No	No	1	SYDE2_exon_chr1:85624932	1	1	0	NA	2	NA	NA	NA	NA	SYDE2_exon_chr1:85624932
LOC100134868	0	9.5942	5.7292	0.0029	UP	No	No	1	LOC100134868_exon_chr20:26001271	1	1	0	NA	1	1	1	1	NA	LOC100134868_exon_chr20:26001271
ZNF460	0	9.5624	5.7254	0.0109	UP	No	No	1	ZNF460_exon_chr19:57802066	1	1	0	NA	1	1	1	1	NA	ZNF460_exon_chr19:57802066
KANSL1	0	9.3488	5.6804	0.0032	UP	No	No	1	KANSL1_exon_chr17:44109069	1	1	0	NA	2	NA	NA	NA	NA	KANSL1_exon_chr17:44109069
C2orf78	0	8.2156	5.5096	0.051	UP	No	No	1	C2orf78_exon_chr2:74042197	1	1	0	NA	1	1	1	1	NA	C2orf78_exon_chr2:74042197
HELB	0.3881	15.5993	5.4628	0.0011	UP	No	No	1	HELB_exon_chr12:66731780	1	1	0	NA	1	1	1	1	NA	HELB_exon_chr12:66731780
CARF	0	7.6982	5.422	0.0145	UP	No	No	1	CARF_exon_chr2:203848228	1	1	0	NA	1	1	1	1	NA	CARF_exon_chr2:203848228
C6orf163	0	7.45	5.3623	0.0231	UP	No	No	1	C6orf163_exon_chr6:88074678	1	1	0	NA	1	1	1	1	NA	C6orf163_exon_chr6:88074678
SMIM6	0	6.687	5.2108	0.005	UP	No	No	1	SMIM6_exon_chr17:73643450	1	1	0	NA	1	1	1	1	NA	SMIM6_exon_chr17:73643450
CPEB2	0	6.3779	5.139	0.1789	NC	No	No	1	CPEB2_exon_chr4:15067776	1	1	0	NA	1	1	1	1	NA	CPEB2_exon_chr4:15067776
SHLD2P3	2.1837	78.2375	5.1256	0	UP	No	No	1	SHLD2P3_exon_chr10:47420256	1	1	0	NA	2	NA	NA	NA	NA	SHLD2P3_exon_chr10:47420256
KANSL1L	0.3881	11.4779	5.0382	0.006	UP	No	No	1	KANSL1L_exon_chr2:210887903	1	1	0	NA	3	NA	NA	NA	NA	KANSL1L_exon_chr2:210887903
LOC101927854	0	5.7072	4.9853	0.0969	UP	No	No	1	LOC101927854_exon_chr3:24231065	1	1	0	NA	1	1	1	1	NA	LOC101927854_exon_chr3:24231065
LINC00862	0	5.6321	4.9696	0.1266	NC	No	No	1	LINC00862_exon_chr1:200312538	1	1	0	NA	1	1	1	1	NA	LINC00862_exon_chr1:200312538
CACTIN-AS1	0	5.6467	4.959	0.0677	UP	No	No	1	CACTIN-AS1_exon_chr19:3612782	1	1	0	NA	1	1	1	1	NA	CACTIN-AS1_exon_chr19:3612782
PSMD6-AS2	0	5.5135	4.9462	0.2385	NC	No	No	1	PSMD6-AS2_exon_chr3:63997472	1	1	0	NA	1	1	1	1	NA	PSMD6-AS2_exon_chr3:63997472
SPDYA	0	5.4643	4.9326	0.115	NC	No	No	1	SPDYA_exon_chr2:29063037	1	1	0	NA	1	1	1	1	NA	SPDYA_exon_chr2:29063037
ZNF532	0	5.2911	4.8814	0.5252	NC	No	No	1	ZNF532_exon_chr18:56651203	1	1	0	NA	1	1	1	1	NA	ZNF532_exon_chr18:56651203
ATXN7L1	0.2548	10.2299	4.8589	0.0189	UP	No	No	1	ATXN7L1_exon_chr7:105248340	1	1	0	NA	1	1	1	1	NA	ATXN7L1_exon_chr7:105248340
SLC4A8	0	5.0602	4.8041	0.1965	NC	No	No	1	SLC4A8_exon_chr12:51868125	1	1	0	NA	1	1	1	1	NA	SLC4A8_exon_chr12:51868125
TTN-AS1	0.2548	9.6752	4.7786	0.069	UP	No	No	1	TTN-AS1_exon_chr2:179403424	1	1	0	NA	1	1	1	1	NA	TTN-AS1_exon_chr2:179403424
STPG4	0	4.9156	4.767	0.2439	NC	No	No	1	STPG4_exon_chr2:47314269	1	1	0	NA	1	1	1	1	NA	STPG4_exon_chr2:47314269
SEMA3D	0	4.9329	4.7647	0.0242	UP	No	No	1	SEMA3D_exon_chr7:84629181	1	1	0	NA	2	NA	NA	NA	NA	SEMA3D_exon_chr7:84629181
NPR2	0	4.7478	4.722	0.277	NC	No	No	1	NPR2_exon_chr9:35809376	1	1	0	NA	1	1	1	1	NA	NPR2_exon_chr9:35809376
NKAPP1	0	4.5396	4.6739	0.1073	NC	No	No	1	NKAPP1_exon_chrX:119372095	1	1	0	NA	1	1	1	1	NA	NKAPP1_exon_chrX:119372095
RUBCNL	0	4.589	4.6693	0.2663	NC	No	No	1	RUBCNL_exon_chr13:46917632	1	1	0	NA	2	NA	NA	NA	NA	RUBCNL_exon_chr13:46917632
PNPLA3	0	4.5745	4.6647	0.3142	NC	No	No	1	PNPLA3_exon_chr22:44342033	1	1	0	NA	1	1	1	1	NA	PNPLA3_exon_chr22:44342033
KCNK3	0	4.2682	4.5658	1	NC	No	No	1	KCNK3_exon_chr2:26950534	1	1	0	NA	1	1	1	1	NA	KCNK3_exon_chr2:26950534
C2orf66	0.3881	8.3429	4.5655	0.0287	UP	No	No	1	C2orf66_exon_chr2:197670132	1	1	0	NA	1	1	1	1	NA	C2orf66_exon_chr2:197670132
GAB2	0.2548	8.0684	4.5148	0.0276	UP	No	No	1	GAB2_exon_chr11:77930461	1	1	0	NA	2	NA	NA	NA	NA	GAB2_exon_chr11:77930461
SPATA12	0	4.1181	4.5053	0.9183	NC	No	No	1	SPATA12_exon_chr3:57107393	1	1	0	NA	1	1	1	1	NA	SPATA12_exon_chr3:57107393
LYRM4-AS1	0	3.9416	4.4496	0.2381	NC	No	No	1	LYRM4-AS1_exon_chr6:5042739	1	1	0	NA	1	1	1	1	NA	LYRM4-AS1_exon_chr6:5042739
PLIN5	0.3881	7.49	4.4264	0.4111	NC	No	No	1	PLIN5_exon_chr19:4524097	1	1	0	NA	1	1	1	1	NA	PLIN5_exon_chr19:4524097
RNASE4	0	3.797	4.4056	0.2295	NC	No	No	1	RNASE4_exon_chr14:21167513	1	1	0	NA	1	1	1	1	NA	RNASE4_exon_chr14:21167513
OSMR-AS1	0	3.7307	4.3672	0.5269	NC	No	No	1	OSMR-AS1_exon_chr5:38796571	1	1	0	NA	1	1	1	1	NA	OSMR-AS1_exon_chr5:38796571
ANP32C	0	3.6729	4.3459	0.287	NC	No	No	1	ANP32C_exon_chr4:165118863	1	1	0	NA	1	1	1	1	NA	ANP32C_exon_chr4:165118863
NR5A2	0	3.5888	4.3347	1	NC	No	No	1	NR5A2_exon_chr1:200143090	1	1	0	NA	2	NA	NA	NA	NA	NR5A2_exon_chr1:200143090
GSTA1	0	3.6324	4.3324	0.2769	NC	No	No	1	GSTA1_exon_chr6:52656778	1	1	0	NA	1	1	1	1	NA	GSTA1_exon_chr6:52656778
LNCAROD	0	3.592	4.3185	0.6191	NC	No	No	1	LNCAROD_exon_chr10:54211277	1	1	0	NA	1	1	1	1	NA	LNCAROD_exon_chr10:54211277
TSPAN8	0	3.5746	4.3124	1	NC	No	No	1	TSPAN8_exon_chr12:71519167	1	1	0	NA	1	1	1	1	NA	TSPAN8_exon_chr12:71519167
LINC01694	0	3.5601	4.3068	0.5548	NC	No	No	1	LINC01694_exon_chr21:47016304	1	1	0	NA	1	1	1	1	NA	LINC01694_exon_chr21:47016304
FBXL22	0	3.5893	4.3041	0.5311	NC	No	No	1	FBXL22_exon_chr15:63891352	1	1	0	NA	1	1	1	1	NA	FBXL22_exon_chr15:63891352
LINC01273	0	3.5457	4.3024	0.2786	NC	No	No	1	LINC01273_exon_chr20:48792817	1	1	0	NA	1	1	1	1	NA	LINC01273_exon_chr20:48792817
DNM1P35	0	3.4734	4.2822	0.1947	NC	No	No	1	DNM1P35_exon_chr15:76022775	1	1	0	NA	1	1	1	1	NA	DNM1P35_exon_chr15:76022775
MAML2	0	3.4852	4.2557	0.2101	NC	No	No	1	MAML2_exon_chr11:95713127	1	1	0	NA	2	NA	NA	NA	NA	MAML2_exon_chr11:95713127
ZC3HAV1L	0	3.3924	4.2453	1	NC	No	No	1	ZC3HAV1L_exon_chr7:138711306	1	1	0	NA	1	1	1	1	NA	ZC3HAV1L_exon_chr7:138711306
FAM135A-AS1	0	3.3551	4.2176	1	NC	No	No	1	FAM135A-AS1_exon_chr6:71122765	1	1	0	NA	1	1	1	1	NA	FAM135A-AS1_exon_chr6:71122765
H3-5	3.5905	64.2373	4.1739	0	UP	No	No	1	H3-5_exon_chr12:31945232	1	1	0	NA	1	1	1	1	NA	H3-5_exon_chr12:31945232
SLC1A4	0.6429	11.5562	4.1684	0.019	UP	No	No	1	SLC1A4_exon_chr2:65248045	1	1	0	NA	3	NA	NA	NA	NA	SLC1A4_exon_chr2:65248045
PRDM1	0	3.2191	4.162	0.8889	NC	No	No	1	PRDM1_exon_chr6:106554785	1	1	0	NA	1	1	1	1	NA	PRDM1_exon_chr6:106554785
FSIP1	0	3.2569	4.162	0.512	NC	No	No	1	FSIP1_exon_chr15:39893127	1	1	0	NA	1	1	1	1	NA	FSIP1_exon_chr15:39893127
LOC100507437	0	3.1933	4.1368	0.5571	NC	No	No	1	LOC100507437_exon_chr14:105884646	1	1	0	NA	1	1	1	1	NA	LOC100507437_exon_chr14:105884646
MRPL45P2	1.4191	22.7533	4.136	0.0001	UP	No	No	1	MRPL45P2_exon_chr17:45560456	1	1	0	NA	1	1	1	1	NA	MRPL45P2_exon_chr17:45560456
SYCP2	0	3.1268	4.1159	1	NC	No	No	1	SYCP2_exon_chr20:58452610	1	1	0	NA	1	1	1	1	NA	SYCP2_exon_chr20:58452610
AFF1	0.2548	5.9181	4.082	0.5153	NC	No	No	1	AFF1_exon_chr4:88056731	1	1	0	NA	2	NA	NA	NA	NA	AFF1_exon_chr4:88056731
MSS51	0	3.014	4.0652	0.3064	NC	No	No	1	MSS51_exon_chr10:75184530	1	1	0	NA	1	1	1	1	NA	MSS51_exon_chr10:75184530
ONECUT1	0	3.0692	4.0608	0.4781	NC	No	No	1	ONECUT1_exon_chr15:53050044	1	1	0	NA	1	1	1	1	NA	ONECUT1_exon_chr15:53050044
LINC01426	0.3517	5.6699	4.0012	0.6951	NC	No	No	1	LINC01426_exon_chr21:36154877	1	1	0	NA	1	1	1	1	NA	LINC01426_exon_chr21:36154877
AKR1B10	0	2.9159	3.9929	1	NC	No	No	1	AKR1B10_exon_chr7:134225798	1	1	0	NA	1	1	1	1	NA	AKR1B10_exon_chr7:134225798
SPX	0	2.7858	3.9476	0.7431	NC	No	No	1	SPX_exon_chr12:21684070	1	1	0	NA	1	1	1	1	NA	SPX_exon_chr12:21684070
ZC3H11B	0	2.78	3.9423	0.6161	NC	No	No	1	ZC3H11B_exon_chr1:219785905	1	1	0	NA	1	1	1	1	NA	ZC3H11B_exon_chr1:219785905
TTPA	0	2.719	3.9315	1	NC	No	No	1	TTPA_exon_chr8:63973984	1	1	0	NA	1	1	1	1	NA	TTPA_exon_chr8:63973984
TCF21	0	2.7282	3.9158	1	NC	No	No	1	TCF21_exon_chr6:134212850	1	1	0	NA	1	1	1	1	NA	TCF21_exon_chr6:134212850
LINC01186	0	2.7048	3.9097	0.7837	NC	No	No	1	LINC01186_exon_chrX:46185889	1	1	0	NA	1	1	1	1	NA	LINC01186_exon_chrX:46185889
C8orf88	0.2548	5.2826	3.9058	0.3669	NC	No	No	1	C8orf88_exon_chr8:91971258	1	1	0	NA	1	1	1	1	NA	C8orf88_exon_chr8:91971258
RAPSN	0.2548	5.2566	3.8988	0.312	NC	No	No	1	RAPSN_exon_chr11:47459598	1	1	0	NA	1	1	1	1	NA	RAPSN_exon_chr11:47459598
KCNE5	0	2.6817	3.8987	1	NC	No	No	1	KCNE5_exon_chrX:108868401	1	1	0	NA	1	1	1	1	NA	KCNE5_exon_chrX:108868401
DNAJB13	0	2.6877	3.8878	0.9014	NC	No	No	1	DNAJB13_exon_chr11:73681005	1	1	0	NA	1	1	1	1	NA	DNAJB13_exon_chr11:73681005
CAVIN4	0	2.6585	3.8858	1	NC	No	No	1	CAVIN4_exon_chr9:103348046	1	1	0	NA	1	1	1	1	NA	CAVIN4_exon_chr9:103348046
CCNB3	0.3881	5.1265	3.8694	0.9185	NC	No	No	1	CCNB3_exon_chrX:50094605	1	1	0	NA	1	1	1	1	NA	CCNB3_exon_chrX:50094605
FRZB	0.3881	5.1671	3.8657	0.355	NC	No	No	1	FRZB_exon_chr2:183699692	1	1	0	NA	1	1	1	1	NA	FRZB_exon_chr2:183699692
SCAMP1-AS1	0	2.6559	3.8541	0.4672	NC	No	No	1	SCAMP1-AS1_exon_chr5:77655809	1	1	0	NA	2	NA	NA	NA	NA	SCAMP1-AS1_exon_chr5:77655809
MSH4	0.6429	9.2616	3.8533	0.158	NC	No	No	1	MSH4_exon_chr1:76378380	1	1	0	NA	1	1	1	1	NA	MSH4_exon_chr1:76378380
CASC2	0	2.5862	3.8515	0.7923	NC	No	No	1	CASC2_exon_chr10:119857706	1	1	0	NA	1	1	1	1	NA	CASC2_exon_chr10:119857706
SLC25A21	0.2548	5.092	3.846	0.32	NC	No	No	1	SLC25A21_exon_chr14:37149924	1	1	0	NA	1	1	1	1	NA	SLC25A21_exon_chr14:37149924
CDKL5	0	2.5662	3.8245	1	NC	No	No	1	CDKL5_exon_chrX:18671551	1	1	0	NA	1	1	1	1	NA	CDKL5_exon_chrX:18671551
DES	0	2.5344	3.8061	0.8092	NC	No	No	1	DES_exon_chr2:220290670	1	1	0	NA	1	1	1	1	NA	DES_exon_chr2:220290670
GAS7	0.3881	4.8806	3.8041	0.5853	NC	No	No	1	GAS7_exon_chr17:9820658	1	1	0	NA	2	NA	NA	NA	NA	GAS7_exon_chr17:9820658
SLAMF7	0	2.4185	3.7753	0.6015	NC	No	No	1	SLAMF7_exon_chr1:160722895	1	1	0	NA	2	NA	NA	NA	NA	SLAMF7_exon_chr1:160722895
COL5A2	0.2548	4.7796	3.7701	0.2884	NC	No	No	1	COL5A2_exon_chr2:189898942	1	1	0	NA	1	1	1	1	NA	COL5A2_exon_chr2:189898942
AADACP1	0	2.413	3.744	0.6262	NC	No	No	1	AADACP1_exon_chr3:151501619	1	1	0	NA	2	NA	NA	NA	NA	AADACP1_exon_chr3:151501619
PTENP1	0.7398	8.889	3.7351	0.0411	UP	No	No	1	PTENP1_exon_chr9:33677418	1	1	0	NA	1	1	1	1	NA	PTENP1_exon_chr9:33677418
DUSP10	0	2.3811	3.7284	0.5903	NC	No	No	1	DUSP10_exon_chr1:221876019	1	1	0	NA	1	1	1	1	NA	DUSP10_exon_chr1:221876019
AKR1C1	0	2.3725	3.7222	0.8935	NC	No	No	1	AKR1C1_exon_chr10:5019891	1	1	0	NA	1	1	1	1	NA	AKR1C1_exon_chr10:5019891
CYP4F2	0	2.3871	3.7189	1	NC	No	No	1	CYP4F2_exon_chr19:15989746	1	1	0	NA	1	1	1	1	NA	CYP4F2_exon_chr19:15989746
KLHDC1	0	2.3467	3.6875	0.9028	NC	No	No	1	KLHDC1_exon_chr14:50218303	1	1	0	NA	1	1	1	1	NA	KLHDC1_exon_chr14:50218303
GPR135	0	2.3088	3.6842	1	NC	No	No	1	GPR135_exon_chr14:59932098	1	1	0	NA	1	1	1	1	NA	GPR135_exon_chr14:59932098
ANXA2R	0.3881	4.4791	3.676	0.4102	NC	No	No	1	ANXA2R_exon_chr5:43040447	1	1	0	NA	1	1	1	1	NA	ANXA2R_exon_chr5:43040447
TRPV2	0.2548	4.4646	3.6704	1	NC	No	No	1	TRPV2_exon_chr17:16340102	1	1	0	NA	1	1	1	1	NA	TRPV2_exon_chr17:16340102
ANKDD1B	0	2.2539	3.6529	1	NC	No	No	1	ANKDD1B_exon_chr5:74966803	1	1	0	NA	1	1	1	1	NA	ANKDD1B_exon_chr5:74966803
DEPDC4	0	2.2657	3.6478	1	NC	No	No	1	DEPDC4_exon_chr12:100646314	1	1	0	NA	1	1	1	1	NA	DEPDC4_exon_chr12:100646314
MOXD1	0	2.2657	3.6415	0.9242	NC	No	No	1	MOXD1_exon_chr6:132618456	1	1	0	NA	1	1	1	1	NA	MOXD1_exon_chr6:132618456
CHSY3	0	2.2657	3.6408	0.8802	NC	No	No	1	CHSY3_exon_chr5:129519921	1	1	0	NA	1	1	1	1	NA	CHSY3_exon_chr5:129519921
LINC01869	0	2.2425	3.6318	1	NC	No	No	1	LINC01869_exon_chr19:51321390	1	1	0	NA	1	1	1	1	NA	LINC01869_exon_chr19:51321390
TLR1	0.2548	4.3463	3.6231	0.4273	NC	No	No	1	TLR1_exon_chr4:38800519	1	1	0	NA	1	1	1	1	NA	TLR1_exon_chr4:38800519
TARID	0.3881	4.329	3.6222	0.7383	NC	No	No	1	TARID_exon_chr6:133823818	1	1	0	NA	1	1	1	1	NA	TARID_exon_chr6:133823818
IFIT3	0.3881	4.274	3.5989	0.115	NC	No	No	1	IFIT3_exon_chr10:91098417	1	1	0	NA	1	1	1	1	NA	IFIT3_exon_chr10:91098417
DPP4	4.5611	54.7528	3.5975	0	UP	No	Yes	1	DPP4_exon_chr2:162849894	1	1	0	NA	3	NA	NA	NA	Shortening	DPP4_exon_chr2:162849894
CEACAM1	0.7645	10.9756	3.5954	0.0313	UP	No	No	1	CEACAM1_exon_chr19:43013380	1	1	0	NA	1	1	1	1	NA	CEACAM1_exon_chr19:43013380
DCAF4L1	0.2548	4.2104	3.5849	0.4729	NC	No	No	1	DCAF4L1_exon_chr4:41983772	1	1	0	NA	1	1	1	1	NA	DCAF4L1_exon_chr4:41983772
SEPTIN4	0.3881	4.2017	3.5835	0.1048	NC	No	No	1	SEPTIN4_exon_chr17:56597846	1	1	0	NA	1	1	1	1	NA	SEPTIN4_exon_chr17:56597846
SPEF1	0.3881	4.2482	3.5821	0.6213	NC	No	No	1	SPEF1_exon_chr20:3758966	1	1	0	NA	1	1	1	1	NA	SPEF1_exon_chr20:3758966
FAT4	0	2.1442	3.5726	1	NC	No	No	1	FAT4_exon_chr4:126411055	1	1	0	NA	1	1	1	1	NA	FAT4_exon_chr4:126411055
FBXL13	0.2548	4.1236	3.5603	1	NC	No	No	1	FBXL13_exon_chr7:102453978	1	1	0	NA	1	1	1	1	NA	FBXL13_exon_chr7:102453978
IL20RB	1.3464	15.4318	3.5492	0.0245	UP	No	No	1	IL20RB_exon_chr3:136728954	1	1	0	NA	1	1	1	1	NA	IL20RB_exon_chr3:136728954
ERAP2	0	2.0893	3.5377	0.6958	NC	No	No	1	ERAP2_exon_chr5:96253165	1	1	0	NA	1	1	1	1	NA	ERAP2_exon_chr5:96253165
DUSP18	0	2.0719	3.5268	1	NC	No	No	1	DUSP18_exon_chr22:31060067	1	1	0	NA	1	1	1	1	NA	DUSP18_exon_chr22:31060067
TM4SF19-TCTEX1D2	0	2.0401	3.5127	0.6841	NC	No	No	1	TM4SF19-TCTEX1D2_exon_chr3:196050868	1	1	0	NA	1	1	1	1	NA	TM4SF19-TCTEX1D2_exon_chr3:196050868
CCDC61	0.5097	6.9412	3.506	0.6896	NC	No	No	1	CCDC61_exon_chr19:46521547	1	1	0	NA	1	1	1	1	NA	CCDC61_exon_chr19:46521547
LOC339862	0	2.0461	3.4992	1	NC	No	No	1	LOC339862_exon_chr3:18308509	1	1	0	NA	1	1	1	1	NA	LOC339862_exon_chr3:18308509
TCAF2	0	2.0461	3.4992	1	NC	No	No	1	TCAF2_exon_chr7:143340956	1	1	0	NA	1	1	1	1	NA	TCAF2_exon_chr7:143340956
H2BC4	0.3881	3.9735	3.4899	0.0861	UP	No	No	1	H2BC4_exon_chr6:26124154	1	1	0	NA	1	1	1	1	NA	H2BC4_exon_chr6:26124154
NCKAP1L	0.3881	3.933	3.4849	0.3738	NC	No	No	1	NCKAP1L_exon_chr12:54936358	1	1	0	NA	1	1	1	1	NA	NCKAP1L_exon_chr12:54936358
CD24	8.1387	88.3762	3.4782	0	UP	No	No	1	CD24_exon_chrY:21154962	1	1	0	NA	1	1	1	1	NA	CD24_exon_chrY:21154962
LOC105372397	0	2.0461	3.4715	0.7781	NC	No	No	1	LOC105372397_exon_chr19:39092052	1	1	0	NA	1	1	1	1	NA	LOC105372397_exon_chr19:39092052
ZNF852	0.9583	10.7211	3.4695	0.0359	UP	No	No	1	ZNF852_exon_chr3:44542126	1	1	0	NA	2	NA	NA	NA	NA	ZNF852_exon_chr3:44542126
GMDS-DT	0	2.0056	3.4682	1	NC	No	No	1	GMDS-DT_exon_chr6:2413013	1	1	0	NA	1	1	1	1	NA	GMDS-DT_exon_chr6:2413013
ISL1	0.3881	3.8575	3.4647	1	NC	No	No	1	ISL1_exon_chr5:50689327	1	1	0	NA	1	1	1	1	NA	ISL1_exon_chr5:50689327
GPR75	0	1.9765	3.461	1	NC	No	No	1	GPR75_exon_chr2:54082002	1	1	0	NA	1	1	1	1	NA	GPR75_exon_chr2:54082002
LINC01191	0	2.0056	3.458	0.9556	NC	No	No	1	LINC01191_exon_chr2:114764595	1	1	0	NA	1	1	1	1	NA	LINC01191_exon_chr2:114764595
LINC01410	0	1.9738	3.4386	1	NC	No	No	1	LINC01410_exon_chr9:66459807	1	1	0	NA	1	1	1	1	NA	LINC01410_exon_chr9:66459807
LINC00319	0	1.9738	3.4366	1	NC	No	No	1	LINC00319_exon_chr21:44873000	1	1	0	NA	1	1	1	1	NA	LINC00319_exon_chr21:44873000
LINC02878	0.2548	3.6611	3.4114	0.3755	NC	No	No	1	LINC02878_exon_chr8:144780108	1	1	0	NA	1	1	1	1	NA	LINC02878_exon_chr8:144780108
POMK	0	1.9015	3.3968	1	NC	No	No	1	POMK_exon_chr8:42977249	1	1	0	NA	1	1	1	1	NA	POMK_exon_chr8:42977249
NLRP1	0.5097	6.2565	3.3937	0.418	NC	No	No	1	NLRP1_exon_chr17:5418393	1	1	0	NA	2	NA	NA	NA	NA	NLRP1_exon_chr17:5418393
MFSD4B	0.7645	9.3946	3.3887	0.1431	NC	No	No	1	MFSD4B_exon_chr6:111587078	1	1	0	NA	3	NA	NA	NA	NA	MFSD4B_exon_chr6:111587078
KLHL32	0.2548	3.6816	3.3883	0.8527	NC	No	No	1	KLHL32_exon_chr6:97561658	1	1	0	NA	1	1	1	1	NA	KLHL32_exon_chr6:97561658
ERV3-1	1.4068	13.8915	3.376	0.0131	UP	No	No	1	ERV3-1_exon_chr7:64466700	1	1	0	NA	1	1	1	1	NA	ERV3-1_exon_chr7:64466700
ALDH3A1	0.3881	3.592	3.3583	0.459	NC	No	No	1	ALDH3A1_exon_chr17:19641548	1	1	0	NA	1	1	1	1	NA	ALDH3A1_exon_chr17:19641548
ZNF843	0	1.8437	3.3525	1	NC	No	No	1	ZNF843_exon_chr16:31448505	1	1	0	NA	1	1	1	1	NA	ZNF843_exon_chr16:31448505
SOX15	0	1.8206	3.3353	0.9882	NC	No	No	1	SOX15_exon_chr17:7491864	1	1	0	NA	1	1	1	1	NA	SOX15_exon_chr17:7491864
SPEF2	0.5097	6.0049	3.3183	0.3662	NC	No	No	1	SPEF2_exon_chr5:35670160	1	1	0	NA	1	1	1	1	NA	SPEF2_exon_chr5:35670160
RNU2-1	0	1.7569	3.3067	0.1595	NC	No	No	1	RNU2-1_exon_chr11:62609281	1	1	0	NA	1	1	1	1	NA	RNU2-1_exon_chr11:62609281
MMP25-AS1	0	1.7801	3.3061	1	NC	No	No	1	MMP25-AS1_exon_chr16:3103623	1	1	0	NA	1	1	1	1	NA	MMP25-AS1_exon_chr16:3103623
MIR12122	0	1.7714	3.2997	1	NC	No	No	1	MIR12122_exon_chr20:48480395	1	1	0	NA	1	1	1	1	NA	MIR12122_exon_chr20:48480395
PKD1L2	0	1.7396	3.2816	0.8819	NC	No	No	1	PKD1L2_exon_chr16:81204410	1	1	0	NA	1	1	1	1	NA	PKD1L2_exon_chr16:81204410
UBA6-AS1	1.0194	11.6485	3.2706	0.0192	UP	No	No	1	UBA6-AS1_exon_chr4:68586139	1	1	0	NA	1	1	1	1	NA	UBA6-AS1_exon_chr4:68586139
ZNF169	0.3881	3.3406	3.2493	0.846	NC	No	No	1	ZNF169_exon_chr9:97061729	1	1	0	NA	1	1	1	1	NA	ZNF169_exon_chr9:97061729
MMADHC-DT	0	1.7078	3.2485	1	NC	No	No	1	MMADHC-DT_exon_chr2:150704422	1	1	0	NA	1	1	1	1	NA	MMADHC-DT_exon_chr2:150704422
CCDC171	0.3881	3.3697	3.2449	0.8043	NC	No	No	1	CCDC171_exon_chr9:15971606	1	1	0	NA	1	1	1	1	NA	CCDC171_exon_chr9:15971606
ARL14	0.3881	3.3059	3.2375	0.9028	NC	No	No	1	ARL14_exon_chr3:160394947	1	1	0	NA	2	NA	NA	NA	NA	ARL14_exon_chr3:160394947
MAP3K14-AS1	0	1.7051	3.235	1	NC	No	No	1	MAP3K14-AS1_exon_chr17:43345375	1	1	0	NA	1	1	1	1	NA	MAP3K14-AS1_exon_chr17:43345375
LOC102723899	0	1.7051	3.235	1	NC	No	No	1	LOC102723899_exon_chr7:90142591	1	1	0	NA	1	1	1	1	NA	LOC102723899_exon_chr7:90142591
LOC101929099	0	1.7051	3.232	1	NC	No	No	1	LOC101929099_exon_chr1:117569408	1	1	0	NA	1	1	1	1	NA	LOC101929099_exon_chr1:117569408
ALDH1L2	0	1.6846	3.2293	1	NC	No	No	1	ALDH1L2_exon_chr12:105418257	1	1	0	NA	1	1	1	1	NA	ALDH1L2_exon_chr12:105418257
SERPING1	0.2548	3.2509	3.2203	1	NC	No	No	1	SERPING1_exon_chr11:57381800	1	1	0	NA	1	1	1	1	NA	SERPING1_exon_chr11:57381800
SCARNA1	0	1.6123	3.2185	1	NC	No	No	1	SCARNA1_exon_chr1:28160911	1	1	0	NA	1	1	1	1	NA	SCARNA1_exon_chr1:28160911
CASP10	0.2548	3.2191	3.2106	0.497	NC	No	No	2	CASP10_exon_chr2:202065165_x000D_ CASP10_exon_chr2:202082310	0.0_x000D_ 1.0	0.6599_x000D_ 0.3401	0.6599_x000D_ -0.6599	NA_x000D_ NA	1_x000D_ 1	1.0_x000D_ 1.0	1.0_x000D_ 1.0	1.0_x000D_ 1.0	NA_x000D_ NA	CASP10_exon_chr2:202065165	CASP10_exon_chr2:202082310
RBPMS-AS1	0.3881	3.2191	3.2047	0.7552	NC	No	No	1	RBPMS-AS1_exon_chr8:30240131	1	1	0	NA	1	1	1	1	NA	RBPMS-AS1_exon_chr8:30240131
SPP1	1.4075	14.0017	3.2045	0.0453	UP	No	No	1	SPP1_exon_chr4:88903643	1	1	0	NA	1	1	1	1	NA	SPP1_exon_chr4:88903643
TTC9	7.0725	66.8531	3.1927	0	UP	No	No	1	TTC9_exon_chr14:71137792	1	1	0	NA	1	1	1	1	NA	TTC9_exon_chr14:71137792
PIH1D2	0.7762	6.2533	3.1747	0.4427	NC	No	No	1	PIH1D2_exon_chr11:111938729	1	1	0	NA	1	1	1	1	NA	PIH1D2_exon_chr11:111938729
C2orf50	0.3881	3.2165	3.1742	1	NC	No	No	1	C2orf50_exon_chr2:11284045	1	1	0	NA	1	1	1	1	NA	C2orf50_exon_chr2:11284045
LINC00524	0	1.6123	3.1693	1	NC	No	No	1	LINC00524_exon_chr14:101872561	1	1	0	NA	1	1	1	1	NA	LINC00524_exon_chr14:101872561
ECM1	0.3881	3.176	3.1677	0.7864	NC	No	No	1	ECM1_exon_chr1:150485712	1	1	0	NA	1	1	1	1	NA	ECM1_exon_chr1:150485712
TRIM6-TRIM34	0.3517	3.115	3.1623	0.8494	NC	No	No	1	TRIM6-TRIM34_exon_chr11:5664373	1	1	0	NA	2	NA	NA	NA	NA	TRIM6-TRIM34_exon_chr11:5664373
HDAC9	0	1.6241	3.1598	1	NC	No	No	1	HDAC9_exon_chr7:18705835	1	1	0	NA	1	1	1	1	NA	HDAC9_exon_chr7:18705835
ARL14EPL	0	1.6241	3.1576	1	NC	No	No	1	ARL14EPL_exon_chr5:115394421	1	1	0	NA	1	1	1	1	NA	ARL14EPL_exon_chr5:115394421
LINC01473	0	1.5923	3.1317	1	NC	No	No	1	LINC01473_exon_chr2:186898529	1	1	0	NA	1	1	1	1	NA	LINC01473_exon_chr2:186898529
IL15	0.2548	3.0863	3.1315	1	NC	No	No	1	IL15_exon_chr4:142653890	1	1	0	NA	1	1	1	1	NA	IL15_exon_chr4:142653890
CYP4F35P	0	1.5836	3.1285	1	NC	No	No	1	CYP4F35P_exon_chr18:14341520	1	1	0	NA	1	1	1	1	NA	CYP4F35P_exon_chr18:14341520
FAM209B	0	1.5923	3.1281	1	NC	No	No	1	FAM209B_exon_chr20:55111227	1	1	0	NA	1	1	1	1	NA	FAM209B_exon_chr20:55111227
FLJ32255	0	1.5923	3.1246	0.8916	NC	No	No	1	FLJ32255_exon_chr5:42985764	1	1	0	NA	1	1	1	1	NA	FLJ32255_exon_chr5:42985764
SLC9B1	0.2548	3.0692	3.1134	1	NC	No	No	1	SLC9B1_exon_chr4:103822489	1	1	0	NA	1	1	1	1	NA	SLC9B1_exon_chr4:103822489
C10orf82	0	1.5605	3.1102	1	NC	No	No	1	C10orf82_exon_chr10:118423782	1	1	0	NA	1	1	1	1	NA	C10orf82_exon_chr10:118423782
AIFM3	0	1.5518	3.1	1	NC	No	No	1	AIFM3_exon_chr22:21335280	1	1	0	NA	1	1	1	1	NA	AIFM3_exon_chr22:21335280
C3orf67	0	1.52	3.0751	1	NC	No	No	1	C3orf67_exon_chr3:58739590	1	1	0	NA	1	1	1	1	NA	C3orf67_exon_chr3:58739590
RASSF6	2.2194	16.9138	3.0709	0.0027	UP	No	No	1	RASSF6_exon_chr4:74442027	1	1	0	NA	1	1	1	1	NA	RASSF6_exon_chr4:74442027
DNM3	0.2548	2.9359	3.0703	0.7837	NC	No	No	1	DNM3_exon_chr1:172387420	1	1	0	NA	1	1	1	1	NA	DNM3_exon_chr1:172387420
KIAA1257	0	1.5113	3.0679	1	NC	No	No	1	KIAA1257_exon_chr3:128690276	1	1	0	NA	1	1	1	1	NA	KIAA1257_exon_chr3:128690276
PRUNE2	0	1.5027	3.0615	1	NC	No	No	1	PRUNE2_exon_chr9:79229516	1	1	0	NA	1	1	1	1	NA	PRUNE2_exon_chr9:79229516
H2AC11	0	1.5027	3.0609	1	NC	No	No	1	H2AC11_exon_chr6:27100821	1	1	0	NA	1	1	1	1	NA	H2AC11_exon_chr6:27100821
TRPC3	0	1.5027	3.0609	1	NC	No	No	1	TRPC3_exon_chr4:122801033	1	1	0	NA	1	1	1	1	NA	TRPC3_exon_chr4:122801033
FMNL1	0.6429	5.3344	3.0607	0.4049	NC	No	No	1	FMNL1_exon_chr17:43324233	1	1	0	NA	1	1	1	1	NA	FMNL1_exon_chr17:43324233
HECTD2	1.0194	10.1836	3.0555	0.0324	UP	No	No	2	HECTD2_exon_chr10:93221851_x000D_ HECTD2_exon_chr10:93272020	0.75_x000D_ 0.25	0.0581_x000D_ 0.9419	-0.6919_x000D_ 0.6919	NA_x000D_ Up	1_x000D_ 3	1.0_x000D_ NA	1.0_x000D_ NA	1.0_x000D_ NA	NA_x000D_ NA	HECTD2_exon_chr10:93221851	HECTD2_exon_chr10:93272020
LIPT2	0	1.4882	3.0484	0.8977	NC	No	No	1	LIPT2_exon_chr11:74203409	1	1	0	NA	1	1	1	1	NA	LIPT2_exon_chr11:74203409
LOC105372582	0	1.4882	3.0474	1	NC	No	No	1	LOC105372582_exon_chr20:25733196	1	1	0	NA	1	1	1	1	NA	LOC105372582_exon_chr20:25733196
WARS2-AS1	0.3881	2.9246	3.0433	0.9008	NC	No	No	1	WARS2-AS1_exon_chr1:119724600	1	1	0	NA	1	1	1	1	NA	WARS2-AS1_exon_chr1:119724600
SRPX2	1.7956	15.6716	3.0424	0.0049	UP	No	No	1	SRPX2_exon_chrX:99925803	1	1	0	NA	2	NA	NA	NA	NA	SRPX2_exon_chrX:99925803
SEC31B	0.8978	7.6751	3.0417	0.3293	NC	No	No	1	SEC31B_exon_chr10:102247552	1	1	0	NA	1	1	1	1	NA	SEC31B_exon_chr10:102247552
TMPRSS5	0.3881	2.9072	3.0364	0.8487	NC	No	No	1	TMPRSS5_exon_chr11:113558996	1	1	0	NA	1	1	1	1	NA	TMPRSS5_exon_chr11:113558996
ZNF41	1.7839	17.1885	3.0226	0.0038	UP	No	No	1	ZNF41_exon_chrX:47308873	1	1	0	NA	3	NA	NA	NA	NA	ZNF41_exon_chrX:47308873
NPPC	0	1.4477	3.0212	1	NC	No	No	1	NPPC_exon_chr2:232787025	1	1	0	NA	1	1	1	1	NA	NPPC_exon_chr2:232787025
GABRG2	0.7645	7.1323	3.0133	0.3984	NC	No	No	1	GABRG2_exon_chr5:161580098	1	1	0	NA	2	NA	NA	NA	NA	GABRG2_exon_chr5:161580098
CYP26A1	0.3881	2.8668	3.0082	0.6388	NC	No	No	1	CYP26A1_exon_chr10:94836719	1	1	0	NA	1	1	1	1	NA	CYP26A1_exon_chr10:94836719
CCT6B	0	1.439	3.0032	1	NC	No	No	1	CCT6B_exon_chr17:33255136	1	1	0	NA	1	1	1	1	NA	CCT6B_exon_chr17:33255136
CLCN1	1.031	7.9093	3.0031	0.2184	NC	No	No	1	CLCN1_exon_chr7:143048686	1	1	0	NA	2	NA	NA	NA	NA	CLCN1_exon_chr7:143048686
ZNF687-AS1	0.6429	5.1351	3.0017	0.5528	NC	No	No	1	ZNF687-AS1_exon_chr1:151252734	1	1	0	NA	1	1	1	1	NA	ZNF687-AS1_exon_chr1:151252734
THTPA	0.6066	5.0165	2.9891	0.1389	NC	No	No	1	THTPA_exon_chr14:24027903	1	1	0	NA	1	1	1	1	NA	THTPA_exon_chr14:24027903
TBC1D26	4.2451	31.6165	2.986	0.0001	UP	No	No	1	TBC1D26_exon_chr17:15647556	1	1	0	NA	1	1	1	1	NA	TBC1D26_exon_chr17:15647556
SULT1C2	1.1526	9.727	2.9697	0.0625	UP	No	No	1	SULT1C2_exon_chr2:108924807	1	1	0	NA	1	1	1	1	NA	SULT1C2_exon_chr2:108924807
TNFAIP8L3	0	1.3754	2.9554	1	NC	No	No	1	TNFAIP8L3_exon_chr15:51350640	1	1	0	NA	1	1	1	1	NA	TNFAIP8L3_exon_chr15:51350640
GOLGA6L4	1.031	7.5623	2.9537	0.1205	NC	No	No	1	GOLGA6L4_exon_chr15:84911211	1	1	0	NA	1	1	1	1	NA	GOLGA6L4_exon_chr15:84911211
ZNF107	6.8431	56.601	2.9483	0	UP	No	Yes	1	ZNF107_exon_chr7:64166701	1	1	0	NA	4	NA	NA	NA	Shortening	ZNF107_exon_chr7:64166701
ZNF192P1	2.1103	15.5355	2.9457	0.0241	UP	No	No	1	ZNF192P1_exon_chr6:28137179	1	1	0	NA	1	1	1	1	NA	ZNF192P1_exon_chr6:28137179
ARMC12	0.6429	4.9069	2.9324	1	NC	No	No	1	ARMC12_exon_chr6:35716314	1	1	0	NA	1	1	1	1	NA	ARMC12_exon_chr6:35716314
LOC100996724	0.7645	6.7216	2.9306	0.3972	NC	No	No	1	LOC100996724_exon_chr1:144852499	1	1	0	NA	1	1	1	1	NA	LOC100996724_exon_chr1:144852499
TBC1D19	5.3373	39.6189	2.9284	0	UP	No	Yes	1	TBC1D19_exon_chr4:26756494	1	1	0	NA	2	NA	NA	NA	Shortening	TBC1D19_exon_chr4:26756494
LOC648987	2.9482	23.7253	2.9233	0.0006	UP	No	No	2	LOC648987_exon_chr5:43015252_x000D_ LOC648987_exon_chr5:43018913	1.0_x000D_ 0.0	0.9257_x000D_ 0.0743	-0.0743_x000D_ 0.0743	NA_x000D_ NA	1_x000D_ 1	1.0_x000D_ 1.0	1.0_x000D_ 1.0	1.0_x000D_ 1.0	NA_x000D_ NA	LOC648987_exon_chr5:43015252	LOC648987_exon_chr5:43018913
NIBAN1	2.4502	17.5498	2.9147	0.0089	UP	No	No	1	NIBAN1_exon_chr1:184765231	1	1	0	NA	3	NA	NA	NA	NA	NIBAN1_exon_chr1:184765231
SLC22A4	0	1.3641	2.9112	1	NC	No	No	1	SLC22A4_exon_chr5:131679452	1	1	0	NA	1	1	1	1	NA	SLC22A4_exon_chr5:131679452
ZHX1-C8orf76	0	1.3641	2.9112	1	NC	No	No	1	ZHX1-C8orf76_exon_chr8:124243997	1	1	0	NA	1	1	1	1	NA	ZHX1-C8orf76_exon_chr8:124243997
FOXA1	0	1.3436	2.9076	1	NC	No	No	1	FOXA1_exon_chr14:38061916	1	1	0	NA	1	1	1	1	NA	FOXA1_exon_chr14:38061916
C2CD6	0	1.3436	2.9076	1	NC	No	No	1	C2CD6_exon_chr2:202401043	1	1	0	NA	1	1	1	1	NA	C2CD6_exon_chr2:202401043
SNORD6	0	1.3436	2.9076	1	NC	No	No	1	SNORD6_exon_chr11:93464739	1	1	0	NA	1	1	1	1	NA	SNORD6_exon_chr11:93464739
PMFBP1	0	1.3436	2.9076	1	NC	No	No	1	PMFBP1_exon_chr16:72198385	1	1	0	NA	1	1	1	1	NA	PMFBP1_exon_chr16:72198385
MATN1-AS1	0	1.3641	2.9014	1	NC	No	No	1	MATN1-AS1_exon_chr1:31199089	1	1	0	NA	1	1	1	1	NA	MATN1-AS1_exon_chr1:31199089
LOC101929536	0.3517	2.5631	2.8816	1	NC	No	No	1	LOC101929536_exon_chr1:40254647	1	1	0	NA	1	1	1	1	NA	LOC101929536_exon_chr1:40254647
GRASP	0.3881	2.5544	2.8738	1	NC	No	No	1	GRASP_exon_chr12:52408477	1	1	0	NA	1	1	1	1	NA	GRASP_exon_chr12:52408477
MGAT4A	10.3464	74.2821	2.8691	0	UP	No	No	1	MGAT4A_exon_chr2:99242055	1	1	0	NA	1	1	1	1	NA	MGAT4A_exon_chr2:99242055
SNORA104	2.8383	19.3036	2.8567	0.0039	UP	No	No	1	SNORA104_exon_chr19:14733024	1	1	0	NA	1	1	1	1	NA	SNORA104_exon_chr19:14733024
STMND1	0.6429	4.6528	2.8356	0.6827	NC	No	No	1	STMND1_exon_chr6:17130824	1	1	0	NA	1	1	1	1	NA	STMND1_exon_chr6:17130824
KNDC1	0.8978	6.7826	2.8339	0.3665	NC	No	No	2	KNDC1_exon_chr10:134992338_x000D_ KNDC1_exon_chr10:135038162	0.5685_x000D_ 0.4315	0.7989_x000D_ 0.2011	0.2304_x000D_ -0.2304	NA_x000D_ NA	1_x000D_ 1	1.0_x000D_ 1.0	1.0_x000D_ 1.0	1.0_x000D_ 1.0	NA_x000D_ NA	KNDC1_exon_chr10:134992338	KNDC1_exon_chr10:135038162
ACVRL1	1.031	7.0945	2.8311	0.5026	NC	No	No	1	ACVRL1_exon_chr12:52314542	1	1	0	NA	2	NA	NA	NA	NA	ACVRL1_exon_chr12:52314542
DOCK3	0.6429	4.5514	2.8242	0.5549	NC	No	No	1	DOCK3_exon_chr3:51418480	1	1	0	NA	1	1	1	1	NA	DOCK3_exon_chr3:51418480
DMC1	0	1.2831	2.8225	1	NC	No	No	1	DMC1_exon_chr22:38965395	1	1	0	NA	1	1	1	1	NA	DMC1_exon_chr22:38965395
GSEC	0.3881	2.4939	2.8179	1	NC	No	No	1	GSEC_exon_chr11:126212217	1	1	0	NA	2	NA	NA	NA	NA	GSEC_exon_chr11:126212217
TLR6	2.6686	18.4169	2.8136	0.0051	UP	No	No	1	TLR6_exon_chr4:38831158	1	1	0	NA	5	NA	NA	NA	NA	TLR6_exon_chr4:38831158
COL16A1	0.2548	2.4621	2.8039	1	NC	No	No	1	COL16A1_exon_chr1:32118454	1	1	0	NA	2	NA	NA	NA	NA	COL16A1_exon_chr1:32118454
LOC101929054	0.3881	2.4448	2.7982	1	NC	No	No	1	LOC101929054_exon_chr3:52274190	1	1	0	NA	1	1	1	1	NA	LOC101929054_exon_chr3:52274190
RAI1	0	1.2513	2.7897	1	NC	No	No	1	RAI1_exon_chr17:17713283	1	1	0	NA	1	1	1	1	NA	RAI1_exon_chr17:17713283
CFI	0	1.2513	2.7862	1	NC	No	No	1	CFI_exon_chr4:110662266	1	1	0	NA	1	1	1	1	NA	CFI_exon_chr4:110662266
PDE4DIPP1	0.7645	6.0396	2.7862	0.4988	NC	No	No	1	PDE4DIPP1_exon_chr1:147566014	1	1	0	NA	1	1	1	1	NA	PDE4DIPP1_exon_chr1:147566014
GOLGA6L5P	1.031	6.7243	2.7835	0.127	NC	No	No	1	GOLGA6L5P_exon_chr15:85053287	1	1	0	NA	1	1	1	1	NA	GOLGA6L5P_exon_chr15:85053287
ARRDC4	0	1.2426	2.7832	1	NC	No	No	1	ARRDC4_exon_chr15:98514360	1	1	0	NA	1	1	1	1	NA	ARRDC4_exon_chr15:98514360
DNAJC12	3.5658	23.2137	2.7771	0.0044	UP	No	No	2	DNAJC12_exon_chr10:69556968_x000D_ DNAJC12_exon_chr10:69571421	0.6741_x000D_ 0.3259	0.1988_x000D_ 0.8012	-0.4753_x000D_ 0.4753	NA_x000D_ Up	1_x000D_ 3	1.0_x000D_ NA	1.0_x000D_ NA	1.0_x000D_ NA	NA_x000D_ NA	DNAJC12_exon_chr10:69556968	DNAJC12_exon_chr10:69571421
PWWP3B	2.2078	15.3214	2.7755	0.0049	UP	No	No	1	PWWP3B_exon_chrX:105449211	1	1	0	NA	1	1	1	1	NA	PWWP3B_exon_chrX:105449211
PACSIN1	0	1.2426	2.7723	0.9796	NC	No	No	1	PACSIN1_exon_chr6:34500197	1	1	0	NA	1	1	1	1	NA	PACSIN1_exon_chr6:34500197
LOC102723665	0.6429	4.3781	2.7585	0.5338	NC	No	No	1	LOC102723665_exon_chr10:98592215	1	1	0	NA	1	1	1	1	NA	LOC102723665_exon_chr10:98592215
PHF7	1.1643	6.9094	2.7573	0.1113	NC	No	No	1	PHF7_exon_chr3:52457106	1	1	0	NA	1	1	1	1	NA	PHF7_exon_chr3:52457106
LINC02626	1.4075	10.2586	2.7525	0.0926	UP	No	No	1	LINC02626_exon_chr10:116756233	1	1	0	NA	1	1	1	1	NA	LINC02626_exon_chr10:116756233
STARD4	24.9163	167.084	2.7503	0	UP	No	Yes	1	STARD4_exon_chr5:110836814	1	1	0	NA	7	0.8755	0.1226	-0.7528	Shortening	STARD4_exon_chr5:110836814
NPAS1	0	1.2108	2.7475	1	NC	No	No	1	NPAS1_exon_chr19:47548448	1	1	0	NA	1	1	1	1	NA	NPAS1_exon_chr19:47548448
C1orf54	4.221	27.0167	2.7418	0.003	UP	No	No	1	C1orf54_exon_chr1:150253245	1	1	0	NA	1	1	1	1	NA	C1orf54_exon_chr1:150253245
OBSCN-AS1	0	1.2021	2.7412	1	NC	No	No	1	OBSCN-AS1_exon_chr1:228391856	1	1	0	NA	1	1	1	1	NA	OBSCN-AS1_exon_chr1:228391856
CCDC134	10.9309	75.4717	2.7411	0	UP	No	No	1	CCDC134_exon_chr22:42221701	1	1	0	NA	1	1	1	1	NA	CCDC134_exon_chr22:42221701
GRAMD2B	13.6215	88.7754	2.7411	0	UP	No	Yes	1	GRAMD2B_exon_chr5:125828606	1	1	0	NA	3	NA	NA	NA	Shortening	GRAMD2B_exon_chr5:125828606
DICER1	46.2337	314.875	2.7407	0	UP	No	Yes	1	DICER1_exon_chr14:95557000	1	1	0	NA	2	0.3756	0.0299	-0.3457	Shortening	DICER1_exon_chr14:95557000
CBR3-AS1	0	1.2021	2.7396	1	NC	No	No	1	CBR3-AS1_exon_chr21:37514244	1	1	0	NA	1	1	1	1	NA	CBR3-AS1_exon_chr21:37514244
RGS17	1.4075	10.2239	2.7333	0.0548	UP	No	No	1	RGS17_exon_chr6:153332897	1	1	0	NA	3	NA	NA	NA	NA	RGS17_exon_chr6:153332897
ZNF596	4.6106	32.4376	2.7257	0.0002	UP	No	No	1	ZNF596_exon_chr8:195153	1	1	0	NA	2	NA	NA	NA	NA	ZNF596_exon_chr8:195153
PARP10	0	1.179	2.7152	1	NC	No	No	1	PARP10_exon_chr8:145051998	1	1	0	NA	1	1	1	1	NA	PARP10_exon_chr8:145051998
WBP11P1	0	1.179	2.7143	1	NC	No	No	1	WBP11P1_exon_chr18:30091625	1	1	0	NA	1	1	1	1	NA	WBP11P1_exon_chr18:30091625
LOC101928068	0	1.1703	2.7128	1	NC	No	No	1	LOC101928068_exon_chr1:245133281	1	1	0	NA	1	1	1	1	NA	LOC101928068_exon_chr1:245133281
ABAT	0	1.1703	2.7082	1	NC	No	No	1	ABAT_exon_chr16:8875165	1	1	0	NA	1	1	1	1	NA	ABAT_exon_chr16:8875165
IFIT2	1.7592	12.0503	2.6995	0.0609	UP	No	No	1	IFIT2_exon_chr10:91065718	1	1	0	NA	1	1	1	1	NA	IFIT2_exon_chr10:91065718
KIF21B	1.4191	8.7186	2.698	0.264	NC	No	No	1	KIF21B_exon_chr1:200943322	1	1	0	NA	1	1	1	1	NA	KIF21B_exon_chr1:200943322
FAM13A-AS1	0	1.1472	2.6747	1	NC	No	No	1	FAM13A-AS1_exon_chr4:89648985	1	1	0	NA	1	1	1	1	NA	FAM13A-AS1_exon_chr4:89648985
PSCA	0.6429	4.1267	2.6713	0.7439	NC	No	No	1	PSCA_exon_chr8:143763338	1	1	0	NA	1	1	1	1	NA	PSCA_exon_chr8:143763338
HTATSF1P2	0.3881	2.1816	2.6697	0.8867	NC	No	No	1	HTATSF1P2_exon_chr6:3024124	1	1	0	NA	1	1	1	1	NA	HTATSF1P2_exon_chr6:3024124
MINDY1	0.3881	2.2744	2.6663	0.8411	NC	No	No	1	MINDY1_exon_chr1:150969843	1	1	0	NA	1	1	1	1	NA	MINDY1_exon_chr1:150969843
SEC24B-AS1	0	1.1067	2.6423	1	NC	No	No	1	SEC24B-AS1_exon_chr4:110351936	1	1	0	NA	1	1	1	1	NA	SEC24B-AS1_exon_chr4:110351936
C17orf67	14.9073	90.4728	2.6418	0	UP	No	Yes	1	C17orf67_exon_chr17:54910703	1	1	0	NA	2	NA	NA	NA	Lengthening	C17orf67_exon_chr17:54910703
GPR162	1.5407	9.9294	2.6373	0.056	UP	No	No	1	GPR162_exon_chr12:6935817	1	1	0	NA	1	1	1	1	NA	GPR162_exon_chr12:6935817
PDIA3P1	0.3881	2.1847	2.6329	1	NC	No	No	1	PDIA3P1_exon_chr1:146649429	1	1	0	NA	1	1	1	1	NA	PDIA3P1_exon_chr1:146649429
SCHIP1	1.674	10.0593	2.6247	0.0628	UP	No	No	1	SCHIP1_exon_chr3:159614511	1	1	0	NA	2	NA	NA	NA	NA	SCHIP1_exon_chr3:159614511
ANK2	0.6429	3.9735	2.6223	0.2647	NC	No	No	1	ANK2_exon_chr4:114302612	1	1	0	NA	2	NA	NA	NA	NA	ANK2_exon_chr4:114302612
SHC2	0.2548	2.1616	2.6112	0.9344	NC	No	No	1	SHC2_exon_chr19:417322	1	1	0	NA	1	1	1	1	NA	SHC2_exon_chr19:417322
PRH1	1.4075	9.3165	2.6078	0.1009	NC	No	No	1	PRH1_exon_chr12:11033655	1	1	0	NA	1	1	1	1	NA	PRH1_exon_chr12:11033655
AKR1C3	1.7949	10.2504	2.5957	0.0388	UP	No	No	1	AKR1C3_exon_chr10:5149652	1	1	0	NA	1	1	1	1	NA	AKR1C3_exon_chr10:5149652
LRRC66	1.4796	8.2388	2.5861	0.3617	NC	No	No	1	LRRC66_exon_chr4:52862331	1	1	0	NA	1	1	1	1	NA	LRRC66_exon_chr4:52862331
LINC00482	3.348	19.6942	2.5842	0.0094	UP	No	No	2	LINC00482_exon_chr17:79279162_x000D_ LINC00482_exon_chr17:79281644	0.5763_x000D_ 0.4237	0.9654_x000D_ 0.0346	0.3891_x000D_ -0.3891	Up_x000D_ NA	1_x000D_ 3	1.0_x000D_ NA	1.0_x000D_ NA	1.0_x000D_ NA	NA_x000D_ NA	LINC00482_exon_chr17:79279162	LINC00482_exon_chr17:79281644
STAT3	29.8294	178.917	2.5727	0	UP	No	Yes	1	STAT3_exon_chr17:40467818	1	1	0	NA	3	0.4983	0.1005	-0.3978	Shortening	STAT3_exon_chr17:40467818
ZNF484	1.4075	9.2156	2.5726	0.0607	UP	No	No	1	ZNF484_exon_chr9:95610833	1	1	0	NA	1	1	1	1	NA	ZNF484_exon_chr9:95610833
SCAND2P	0.2548	2.0719	2.5693	1	NC	No	No	1	SCAND2P_exon_chr15:85182738	1	1	0	NA	1	1	1	1	NA	SCAND2P_exon_chr15:85182738
EFHC1	1.031	5.8576	2.561	0.4859	NC	No	No	1	EFHC1_exon_chr6:52357067	1	1	0	NA	1	1	1	1	NA	EFHC1_exon_chr6:52357067
SYN1	0.3881	2.0575	2.5582	1	NC	No	No	1	SYN1_exon_chrX:47432398	1	1	0	NA	1	1	1	1	NA	SYN1_exon_chrX:47432398
RRN3P1	0.7645	5.0137	2.5473	0.7938	NC	No	No	1	RRN3P1_exon_chr16:21808433	1	1	0	NA	1	1	1	1	NA	RRN3P1_exon_chr16:21808433
LINC00470	1.0915	6.0109	2.544	0.5707	NC	No	No	1	LINC00470_exon_chr18:1269853	1	1	0	NA	1	1	1	1	NA	LINC00470_exon_chr18:1269853
TSTD3	7.909	45.2794	2.5425	0	UP	No	Yes	1	TSTD3_exon_chr6:99979507	1	1	0	NA	4	NA	NA	NA	Both	TSTD3_exon_chr6:99979507
THORLNC	0.2548	2.0461	2.5375	1	NC	No	No	1	THORLNC_exon_chr2:118940898	1	1	0	NA	1	1	1	1	NA	THORLNC_exon_chr2:118940898
ZNF440	2.172	13.9229	2.5357	0.0337	UP	No	No	1	ZNF440_exon_chr19:11942182	1	1	0	NA	2	NA	NA	NA	NA	ZNF440_exon_chr19:11942182
LINC01123	19.3265	115.914	2.5313	0	UP	No	No	3	LINC01123_exon_chr2:110745137_x000D_ LINC01123_exon_chr2:110751977_x000D_ LINC01123_exon_chr2:111141521	0.3259_x000D_ 0.2422_x000D_ 0.4319	0.4048_x000D_ 0.1773_x000D_ 0.4179	0.0789_x000D_ -0.0649_x000D_ -0.014	NA_x000D_ NA_x000D_ NA	2_x000D_ 1_x000D_ 1	NA_x000D_ 1.0_x000D_ 1.0	NA_x000D_ 1.0_x000D_ 1.0	NA_x000D_ 1.0_x000D_ 1.0	NA_x000D_ NA_x000D_ NA	LINC01123_exon_chr2:110745137	LINC01123_exon_chr2:110751977	LINC01123_exon_chr2:111141521
TFDP1	236.155	1365.75	2.5275	0	UP	No	Yes	1	TFDP1_exon_chr13:114294434	1	1	0	NA	5	0.6793	0.0432	-0.6361	Shortening	TFDP1_exon_chr13:114294434
VWA5A	0.5097	3.3955	2.5128	0.8321	NC	No	No	1	VWA5A_exon_chr11:123994943	1	1	0	NA	2	NA	NA	NA	NA	VWA5A_exon_chr11:123994943
ZNF527	0.7762	4.0484	2.5094	0.9212	NC	No	No	1	ZNF527_exon_chr19:37879207	1	1	0	NA	1	1	1	1	NA	ZNF527_exon_chr19:37879207
TCN1	0.7034	3.878	2.5008	1	NC	No	No	1	TCN1_exon_chr11:59620509	1	1	0	NA	1	1	1	1	NA	TCN1_exon_chr11:59620509
RAB27B	0.3517	1.9533	2.5	1	NC	No	No	1	RAB27B_exon_chr18:52556454	1	1	0	NA	2	NA	NA	NA	NA	RAB27B_exon_chr18:52556454
KCNMB2-AS1	0	1.0231	2.4932	1	NC	No	No	1	KCNMB2-AS1_exon_chr3:178467024	1	1	0	NA	1	1	1	1	NA	KCNMB2-AS1_exon_chr3:178467024
P3H2	0	1.0231	2.4932	1	NC	No	No	1	P3H2_exon_chr3:189675793	1	1	0	NA	1	1	1	1	NA	P3H2_exon_chr3:189675793
ACTR3-AS1	0	1.0231	2.4932	1	NC	No	No	1	ACTR3-AS1_exon_chr2:114589005	1	1	0	NA	1	1	1	1	NA	ACTR3-AS1_exon_chr2:114589005
VMA21	166.428	934.552	2.493	0	UP	No	Yes	1	VMA21_exon_chrX:150573387	1	1	0	NA	5	0.3955	0.0202	-0.3753	Shortening	VMA21_exon_chrX:150573387
DNALI1	0	1.0231	2.4911	1	NC	No	No	1	DNALI1_exon_chr1:38030626	1	1	0	NA	1	1	1	1	NA	DNALI1_exon_chr1:38030626
ZNF573	0.7645	4.7451	2.4911	1	NC	No	No	1	ZNF573_exon_chr19:38231095	1	1	0	NA	1	1	1	1	NA	ZNF573_exon_chr19:38231095
STYK1	6.04	31.9148	2.4846	0.0001	UP	No	Yes	1	STYK1_exon_chr12:10772947	1	1	0	NA	4	NA	NA	NA	Both	STYK1_exon_chr12:10772947
LOC101928659	1.1643	5.875	2.4837	0.5489	NC	No	No	1	LOC101928659_exon_chr16:87351462	1	1	0	NA	1	1	1	1	NA	LOC101928659_exon_chr16:87351462
ESRRB	0	1.0231	2.476	1	NC	No	No	1	ESRRB_exon_chr14:76967037	1	1	0	NA	1	1	1	1	NA	ESRRB_exon_chr14:76967037
NHLRC3	3.5789	20.7741	2.4755	0.0044	UP	No	Yes	1	NHLRC3_exon_chr13:39621810	1	1	0	NA	4	NA	NA	NA	Both	NHLRC3_exon_chr13:39621810
CKLF-CMTM1	0	1.0231	2.4751	1	NC	No	No	1	CKLF-CMTM1_exon_chr16:66612733	1	1	0	NA	1	1	1	1	NA	CKLF-CMTM1_exon_chr16:66612733
SLC7A11	50.2904	278.944	2.475	0.0002	UP	No	Yes	1	SLC7A11_exon_chr4:139093171	1	1	0	NA	4	0.8123	0.1313	-0.681	Shortening	SLC7A11_exon_chr4:139093171
PCSK6-AS1	0.7398	3.5888	2.4716	0.2894	NC	No	No	1	PCSK6-AS1_exon_chr15:101877231	1	1	0	NA	1	1	1	1	NA	PCSK6-AS1_exon_chr15:101877231
ST6GALNAC2	0	0.9826	2.4387	1	NC	No	No	1	ST6GALNAC2_exon_chr17:74562353	1	1	0	NA	1	1	1	1	NA	ST6GALNAC2_exon_chr17:74562353
DIP2A-IT1	0	0.9826	2.4384	1	NC	No	No	1	DIP2A-IT1_exon_chr21:47889058	1	1	0	NA	1	1	1	1	NA	DIP2A-IT1_exon_chr21:47889058
ZFP37	0	0.9826	2.4277	1	NC	No	No	1	ZFP37_exon_chr9:115806548	1	1	0	NA	1	1	1	1	NA	ZFP37_exon_chr9:115806548
RET	0	0.9826	2.4264	1	NC	No	No	1	RET_exon_chr10:43622022	1	1	0	NA	1	1	1	1	NA	RET_exon_chr10:43622022
RFESD	0	0.9826	2.4251	1	NC	No	No	1	RFESD_exon_chr5:94991749	1	1	0	NA	2	NA	NA	NA	NA	RFESD_exon_chr5:94991749
STXBP5	9.9464	51.3975	2.424	0	UP	No	Yes	1	STXBP5_exon_chr6:147705849	1	1	0	NA	6	NA	NA	NA	Both	STXBP5_exon_chr6:147705849
ULK2	3.3363	18.4048	2.4183	0.0124	UP	No	No	1	ULK2_exon_chr17:19679720	1	1	0	NA	3	NA	NA	NA	NA	ULK2_exon_chr17:19679720
ZNF221	1.0551	5.4125	2.4164	0.728	NC	No	No	1	ZNF221_exon_chr19:44469955	1	1	0	NA	1	1	1	1	NA	ZNF221_exon_chr19:44469955
ZEB1	24.8327	134.248	2.4121	0	UP	No	Yes	1	ZEB1_exon_chr10:31815599	1	1	0	NA	3	0.2934	0.5249	0.2315	Both	ZEB1_exon_chr10:31815599
CXCL8	1.4796	7.3837	2.4099	0.1983	NC	No	No	1	CXCL8_exon_chr4:74607665	1	1	0	NA	1	1	1	1	NA	CXCL8_exon_chr4:74607665
LINC01138	1.6376	8.6203	2.4076	0.0812	UP	No	No	1	LINC01138_exon_chr1:143718868	1	1	0	NA	1	1	1	1	NA	LINC01138_exon_chr1:143718868
ALOXE3	0.7398	3.5888	2.4028	0.9869	NC	No	No	1	ALOXE3_exon_chr17:8000124	1	1	0	NA	1	1	1	1	NA	ALOXE3_exon_chr17:8000124
LONRF3	2.9112	15.3388	2.4016	0.0114	UP	No	No	1	LONRF3_exon_chrX:118151497	1	1	0	NA	1	1	1	1	NA	LONRF3_exon_chrX:118151497
AHDC1	1.5648	8.3571	2.392	0.0963	UP	No	No	1	AHDC1_exon_chr1:27861427	1	1	0	NA	1	1	1	1	NA	AHDC1_exon_chr1:27861427
CPXM1	0.3881	1.8437	2.3903	1	NC	No	No	1	CPXM1_exon_chr20:2775077	1	1	0	NA	1	1	1	1	NA	CPXM1_exon_chr20:2775077
ZNF487	1.5524	7.5456	2.387	0.6371	NC	No	No	1	ZNF487_exon_chr10:43976876	1	1	0	NA	1	1	1	1	NA	ZNF487_exon_chr10:43976876
TUBG2	1.2859	6.7303	2.3858	0.1784	NC	No	No	1	TUBG2_exon_chr17:40818620	1	1	0	NA	1	1	1	1	NA	TUBG2_exon_chr17:40818620
DENND4A	2.341	11.984	2.3851	0.0359	UP	No	No	1	DENND4A_exon_chr15:65954325	1	1	0	NA	4	NA	NA	NA	NA	DENND4A_exon_chr15:65954325
HFE	1.5407	8.2793	2.3807	0.1134	NC	No	No	1	HFE_exon_chr6:26094413	1	1	0	NA	2	NA	NA	NA	NA	HFE_exon_chr6:26094413
SNAI2	0	0.9421	2.3805	1	NC	No	No	1	SNAI2_exon_chr8:49831547	1	1	0	NA	1	1	1	1	NA	SNAI2_exon_chr8:49831547
ATL1	0	0.9508	2.3798	1	NC	No	No	1	ATL1_exon_chr14:51098946	1	1	0	NA	1	1	1	1	NA	ATL1_exon_chr14:51098946
BHMG1	0	0.9508	2.3792	1	NC	No	No	1	BHMG1_exon_chr19:46267228	1	1	0	NA	1	1	1	1	NA	BHMG1_exon_chr19:46267228
LOC100507564	1.031	5.1843	2.376	0.7762	NC	No	No	1	LOC100507564_exon_chr1:53708109	1	1	0	NA	1	1	1	1	NA	LOC100507564_exon_chr1:53708109
OTUD4	26.2527	139.246	2.3701	0	UP	No	Yes	1	OTUD4_exon_chr4:146059802	1	1	0	NA	3	0.802	0.0952	-0.7068	Both	OTUD4_exon_chr4:146059802
YWHAEP1	0.3881	1.8119	2.3684	1	NC	No	No	1	YWHAEP1_exon_chr7:63894070	1	1	0	NA	1	1	1	1	NA	YWHAEP1_exon_chr7:63894070
ARSK	2.0141	11.2935	2.3679	0.0588	UP	No	No	1	ARSK_exon_chr5:94938940	1	1	0	NA	2	NA	NA	NA	NA	ARSK_exon_chr5:94938940
SSBP2	1.7345	8.7622	2.3674	0.2705	NC	No	No	1	SSBP2_exon_chr5:80716352	1	1	0	NA	1	1	1	1	NA	SSBP2_exon_chr5:80716352
C10orf143	0	0.9421	2.3669	1	NC	No	No	1	C10orf143_exon_chr10:131862647	1	1	0	NA	1	1	1	1	NA	C10orf143_exon_chr10:131862647
INTS6-AS1	0.7034	3.4852	2.3655	0.8408	NC	No	No	1	INTS6-AS1_exon_chr13:52028138	1	1	0	NA	1	1	1	1	NA	INTS6-AS1_exon_chr13:52028138
MSMP	0.3517	1.8032	2.3636	1	NC	No	No	1	MSMP_exon_chr9:35753277	1	1	0	NA	1	1	1	1	NA	MSMP_exon_chr9:35753277
UBE2D3-AS1	0.3881	1.8032	2.3635	1	NC	No	No	1	UBE2D3-AS1_exon_chr4:103764480	1	1	0	NA	1	1	1	1	NA	UBE2D3-AS1_exon_chr4:103764480
UCP2	6.988	36.9863	2.3605	0.0003	UP	No	No	1	UCP2_exon_chr11:73686166	1	1	0	NA	1	1	1	1	NA	UCP2_exon_chr11:73686166
GPM6A	1.7345	8.3716	2.3601	0.0548	UP	No	No	1	GPM6A_exon_chr4:176556208	1	1	0	NA	2	NA	NA	NA	NA	GPM6A_exon_chr4:176556208
TNS3	3.2993	16.5062	2.3472	0.0096	UP	No	No	1	TNS3_exon_chr7:47317818	1	1	0	NA	3	NA	NA	NA	NA	TNS3_exon_chr7:47317818
KLF8	0.7762	3.6238	2.3448	0.9796	NC	No	No	1	KLF8_exon_chrX:56310745	1	1	0	NA	1	1	1	1	NA	KLF8_exon_chrX:56310745
MAMSTR	1.0194	5.9704	2.3437	0.5482	NC	No	No	1	MAMSTR_exon_chr19:49216807	1	1	0	NA	2	NA	NA	NA	NA	MAMSTR_exon_chr19:49216807
SOGA3	0.8978	4.7105	2.3413	0.865	NC	No	No	1	SOGA3_exon_chr6:127834194	1	1	0	NA	1	1	1	1	NA	SOGA3_exon_chr6:127834194
CCDC142	1.9529	9.773	2.3386	0.0796	UP	No	No	1	CCDC142_exon_chr2:74701929	1	1	0	NA	1	1	1	1	NA	CCDC142_exon_chr2:74701929
SH2D6	0	0.9016	2.3255	1	NC	No	No	1	SH2D6_exon_chr2:85663933	1	1	0	NA	1	1	1	1	NA	SH2D6_exon_chr2:85663933
XKRX	0	0.9016	2.3255	1	NC	No	No	1	XKRX_exon_chrX:100170072	1	1	0	NA	1	1	1	1	NA	XKRX_exon_chrX:100170072
LHB	0	0.9016	2.3254	1	NC	No	No	1	LHB_exon_chr19:49519567	1	1	0	NA	1	1	1	1	NA	LHB_exon_chr19:49519567
MGC16275	0	0.9016	2.325	1	NC	No	No	1	MGC16275_exon_chr17:72207821	1	1	0	NA	1	1	1	1	NA	MGC16275_exon_chr17:72207821
ABI3BP	0	0.9016	2.3248	1	NC	No	No	1	ABI3BP_exon_chr3:100469454	1	1	0	NA	1	1	1	1	NA	ABI3BP_exon_chr3:100469454
EPO	0	0.9016	2.3243	1	NC	No	No	1	EPO_exon_chr7:100320600	1	1	0	NA	1	1	1	1	NA	EPO_exon_chr7:100320600
GAS5-AS1	0	0.9016	2.3243	1	NC	No	No	1	GAS5-AS1_exon_chr1:173832385	1	1	0	NA	1	1	1	1	NA	GAS5-AS1_exon_chr1:173832385
KCNB1	0	0.9016	2.3243	1	NC	No	No	1	KCNB1_exon_chr20:47991529	1	1	0	NA	2	NA	NA	NA	NA	KCNB1_exon_chr20:47991529
SLC5A11	0.5097	2.8031	2.3181	1	NC	No	No	1	SLC5A11_exon_chr16:24922648	1	1	0	NA	1	1	1	1	NA	SLC5A11_exon_chr16:24922648
PRDM15	3.7601	18.2723	2.3168	0.0375	UP	No	No	1	PRDM15_exon_chr21:43221882	1	1	0	NA	3	NA	NA	NA	NA	PRDM15_exon_chr21:43221882
RADX	9.0619	45.9763	2.3147	0	UP	No	Yes	1	RADX_exon_chrX:105921357	1	1	0	NA	2	NA	NA	NA	Shortening	RADX_exon_chrX:105921357
SNHG26	1.1526	5.9931	2.3129	0.6018	NC	No	No	1	SNHG26_exon_chr7:22900504	1	1	0	NA	1	1	1	1	NA	SNHG26_exon_chr7:22900504
ST7	5.1435	25.6384	2.3116	0.0008	UP	No	No	2	ST7_exon_chr7:116862914_x000D_ ST7_exon_chr7:116869815	0.0_x000D_ 1.0	0.0452_x000D_ 0.9548	0.0452_x000D_ -0.0452	NA_x000D_ NA	2_x000D_ 1	NA_x000D_ 1.0	NA_x000D_ 1.0	NA_x000D_ 1.0	NA_x000D_ NA	ST7_exon_chr7:116862914	ST7_exon_chr7:116869815
CDKN2D	5.1435	25.4213	2.3078	0.0016	UP	No	No	1	CDKN2D_exon_chr19:10678093	1	1	0	NA	1	1	1	1	NA	CDKN2D_exon_chr19:10678093
GPR137C	1.4075	7.2217	2.3069	0.5277	NC	No	No	1	GPR137C_exon_chr14:53101655	1	1	0	NA	2	NA	NA	NA	NA	GPR137C_exon_chr14:53101655
SRGAP3	0.7762	3.4534	2.3068	0.8495	NC	No	No	1	SRGAP3_exon_chr3:9027616	1	1	0	NA	2	NA	NA	NA	NA	SRGAP3_exon_chr3:9027616
FSD1L	2.7422	14.8592	2.3008	0.0323	UP	No	No	2	FSD1L_exon_chr9:108234184_x000D_ FSD1L_exon_chr9:108308638	0.6283_x000D_ 0.3717	0.7067_x000D_ 0.2933	0.0784_x000D_ -0.0784	NA_x000D_ NA	3_x000D_ 1	NA_x000D_ 1.0	NA_x000D_ 1.0	NA_x000D_ 1.0	NA_x000D_ NA	FSD1L_exon_chr9:108234184	FSD1L_exon_chr9:108308638
CATSPER2	1.1526	6.0454	2.2988	1	NC	No	No	1	CATSPER2_exon_chr15:43922930	1	1	0	NA	1	1	1	1	NA	CATSPER2_exon_chr15:43922930
NEXN	3.8688	18.8331	2.2969	0.3475	NC	No	No	3	NEXN_exon_chr1:78383809_x000D_ NEXN_exon_chr1:78407707_x000D_ NEXN_exon_chr1:78408145	0.5455_x000D_ 0.4545_x000D_ 0.0	0.4804_x000D_ 0.4422_x000D_ 0.0774	-0.0651_x000D_ -0.0123_x000D_ 0.0774	NA_x000D_ NA_x000D_ NA	1_x000D_ 1_x000D_ 1	1.0_x000D_ 1.0_x000D_ 1.0	1.0_x000D_ 1.0_x000D_ 1.0	1.0_x000D_ 1.0_x000D_ 1.0	NA_x000D_ NA_x000D_ NA	NEXN_exon_chr1:78383809	NEXN_exon_chr1:78407707	NEXN_exon_chr1:78408145
TCN2	1.1526	6.0627	2.2944	0.2138	NC	No	No	1	TCN2_exon_chr22:31022446	1	1	0	NA	1	1	1	1	NA	TCN2_exon_chr22:31022446
FRMD4A	0	0.8785	2.2937	1	NC	No	No	1	FRMD4A_exon_chr10:13689035	1	1	0	NA	1	1	1	1	NA	FRMD4A_exon_chr10:13689035
AKAP7	1.2742	7.2649	2.2891	0.1465	NC	No	No	1	AKAP7_exon_chr6:131602669	1	1	0	NA	2	NA	NA	NA	NA	AKAP7_exon_chr6:131602669
CFHR1	0	0.8785	2.289	1	NC	No	No	1	CFHR1_exon_chr1:196800926	1	1	0	NA	1	1	1	1	NA	CFHR1_exon_chr1:196800926
LINC02608	1.9288	9.4787	2.2887	0.172	NC	No	No	1	LINC02608_exon_chr1:212398855	1	1	0	NA	1	1	1	1	NA	LINC02608_exon_chr1:212398855
LOC100506302	5.6162	26.9818	2.2871	0.0007	UP	No	Yes	1	LOC100506302_exon_chr7:155435664	1	1	0	NA	3	NA	NA	NA	Both	LOC100506302_exon_chr7:155435664
DKKL1	0	0.8698	2.2844	1	NC	No	No	1	DKKL1_exon_chr19:49877973	1	1	0	NA	1	1	1	1	NA	DKKL1_exon_chr19:49877973
LOC101928728	0.2548	1.676	2.282	1	NC	No	No	1	LOC101928728_exon_chr1:27020622	1	1	0	NA	1	1	1	1	NA	LOC101928728_exon_chr1:27020622
SMCO2	0	0.8698	2.2766	1	NC	No	No	1	SMCO2_exon_chr12:27654855	1	1	0	NA	1	1	1	1	NA	SMCO2_exon_chr12:27654855
SPACA6	1.8072	8.1662	2.2696	0.2051	NC	No	No	1	SPACA6_exon_chr19:52208342	1	1	0	NA	1	1	1	1	NA	SPACA6_exon_chr19:52208342
GIP	0.3881	1.7051	2.2681	1	NC	No	No	1	GIP_exon_chr17:47036078	1	1	0	NA	1	1	1	1	NA	GIP_exon_chr17:47036078
ARL17B	52.6424	250.587	2.2677	0	UP	No	Yes	2	ARL17B_exon_chr17:44417140_x000D_ ARL17B_exon_chr17:44634996	0.506_x000D_ 0.4793	0.4865_x000D_ 0.496	-0.0195_x000D_ 0.0167	NA_x000D_ NA	3_x000D_ 3	0.4947_x000D_ 0.4901	0.0854_x000D_ 0.084	-0.4094_x000D_ -0.4061	Shortening_x000D_ Shortening	ARL17B_exon_chr17:44417140	ARL17B_exon_chr17:44634996
STX17-AS1	0.2548	1.6441	2.2634	1	NC	No	No	1	STX17-AS1_exon_chr9:102648977	1	1	0	NA	1	1	1	1	NA	STX17-AS1_exon_chr9:102648977
GPR87	7.5341	37.6392	2.2545	0	UP	No	No	1	GPR87_exon_chr3:151012999	1	1	0	NA	3	NA	NA	NA	NA	GPR87_exon_chr3:151012999
HDAC2-AS2	0.3881	1.7051	2.2434	1	NC	No	No	1	HDAC2-AS2_exon_chr6:114316763	1	1	0	NA	1	1	1	1	NA	HDAC2-AS2_exon_chr6:114316763
MIR600HG	2.5718	12.1601	2.243	0.1278	NC	No	No	1	MIR600HG_exon_chr9:125877756	1	1	0	NA	1	1	1	1	NA	MIR600HG_exon_chr9:125877756
GLYCTK	1.3827	6.3606	2.2423	0.6176	NC	No	No	1	GLYCTK_exon_chr3:52326275	1	1	0	NA	1	1	1	1	NA	GLYCTK_exon_chr3:52326275
HLA-DRA	1.5044	7.4008	2.2405	0.4756	NC	No	No	1	HLA-DRA_exon_chr6:32412428	1	1	0	NA	1	1	1	1	NA	HLA-DRA_exon_chr6:32412428
SUSD1	4.4155	21.1156	2.2359	0.0083	UP	No	Yes	1	SUSD1_exon_chr9:114803772	1	1	0	NA	2	NA	NA	NA	Shortening	SUSD1_exon_chr9:114803772
HUS1	23.4513	113.271	2.2313	0	UP	No	No	1	HUS1_exon_chr7:48005035	1	1	0	NA	3	NA	NA	NA	NA	HUS1_exon_chr7:48005035
ENO1-AS1	0.3517	1.6646	2.2245	1	NC	No	No	1	ENO1-AS1_exon_chr1:8939623	1	1	0	NA	1	1	1	1	NA	ENO1-AS1_exon_chr1:8939623
BST2	0.7645	4.1381	2.2243	1	NC	No	No	1	BST2_exon_chr19:17514135	1	1	0	NA	1	1	1	1	NA	BST2_exon_chr19:17514135
PRANCR	3.0931	13.839	2.2136	0.0948	UP	No	No	1	PRANCR_exon_chr12:70636673	1	1	0	NA	2	NA	NA	NA	NA	PRANCR_exon_chr12:70636673
ERVK13-1	3.4579	17.1193	2.2127	0.0327	UP	No	Yes	1	ERVK13-1_exon_chr16:2713408	1	1	0	NA	2	NA	NA	NA	Lengthening	ERVK13-1_exon_chr16:2713408
MAN1C1	0.7762	3.2365	2.206	1	NC	No	No	1	MAN1C1_exon_chr1:26110153	1	1	0	NA	1	1	1	1	NA	MAN1C1_exon_chr1:26110153
RNU4-2	0	0.8062	2.2042	1	NC	No	No	1	RNU4-2_exon_chr12:120729706	1	1	0	NA	1	1	1	1	NA	RNU4-2_exon_chr12:120729706
SMPD3	0.7645	3.7684	2.1966	1	NC	No	No	1	SMPD3_exon_chr16:68395210	1	1	0	NA	1	1	1	1	NA	SMPD3_exon_chr16:68395210
ADAL	0.7762	3.2365	2.1952	1	NC	No	No	1	ADAL_exon_chr15:43643948	1	1	0	NA	2	NA	NA	NA	NA	ADAL_exon_chr15:43643948
GTF2IP12	0.2548	1.6328	2.1943	1	NC	No	No	1	GTF2IP12_exon_chr4:120371280	1	1	0	NA	1	1	1	1	NA	GTF2IP12_exon_chr4:120371280
CDKN2B-AS1	0.8978	4.2913	2.1892	1	NC	No	No	1	CDKN2B-AS1_exon_chr9:22120502	1	1	0	NA	1	1	1	1	NA	CDKN2B-AS1_exon_chr9:22120502
WDR59	9.6441	43.977	2.1888	0.0004	UP	No	No	3	WDR59_exon_chr16:74908342_x000D_ WDR59_exon_chr16:74942875_x000D_ WDR59_exon_chr16:74946260	0.6402_x000D_ 0.1863_x000D_ 0.1735	0.1233_x000D_ 0.0788_x000D_ 0.7979	-0.5169_x000D_ -0.1075_x000D_ 0.6244	NA_x000D_ NA_x000D_ Up	1_x000D_ 1_x000D_ 1	1.0_x000D_ 1.0_x000D_ 1.0	1.0_x000D_ 1.0_x000D_ 1.0	1.0_x000D_ 1.0_x000D_ 1.0	NA_x000D_ NA_x000D_ NA	WDR59_exon_chr16:74908342	WDR59_exon_chr16:74942875	WDR59_exon_chr16:74946260
PDCD6IPP2	0	0.8062	2.188	1	NC	No	No	1	PDCD6IPP2_exon_chr15:29061898	1	1	0	NA	1	1	1	1	NA	PDCD6IPP2_exon_chr15:29061898
DDX3Y	11.9962	53.2957	2.1877	0.0005	UP	No	Yes	1	DDX3Y_exon_chrY:15029954	1	1	0	NA	3	NA	NA	NA	Both	DDX3Y_exon_chrY:15029954
FRG1DP	2.7167	11.3566	2.185	0.1875	NC	No	No	1	FRG1DP_exon_chrUn:gl000219	1	1	0	NA	1	1	1	1	NA	FRG1DP_exon_chrUn:gl000219
LOC101927727	0.2548	1.6328	2.1825	1	NC	No	No	1	LOC101927727_exon_chr17:813933	1	1	0	NA	1	1	1	1	NA	LOC101927727_exon_chr17:813933
SEC14L4	2.5601	12.4725	2.1819	0.0818	UP	No	No	1	SEC14L4_exon_chr22:30886233	1	1	0	NA	2	NA	NA	NA	NA	SEC14L4_exon_chr22:30886233
CCL26	0.8614	4.0689	2.1817	1	NC	No	No	1	CCL26_exon_chr7:75399107	1	1	0	NA	1	1	1	1	NA	CCL26_exon_chr7:75399107
PACERR	0	0.8062	2.1794	1	NC	No	No	1	PACERR_exon_chr1:186649785	1	1	0	NA	1	1	1	1	NA	PACERR_exon_chr1:186649785
FAM66C	0.7762	3.2683	2.179	1	NC	No	No	1	FAM66C_exon_chr12:8352303	1	1	0	NA	1	1	1	1	NA	FAM66C_exon_chr12:8352303
LINC00663	0	0.8062	2.1759	1	NC	No	No	1	LINC00663_exon_chr19:19869355	1	1	0	NA	1	1	1	1	NA	LINC00663_exon_chr19:19869355
TSGA10IP	0	0.8062	2.1759	1	NC	No	No	1	TSGA10IP_exon_chr11:65727287	1	1	0	NA	1	1	1	1	NA	TSGA10IP_exon_chr11:65727287
UBL3	14.9198	66.3579	2.1744	0	UP	No	Yes	1	UBL3_exon_chr13:30341444	1	1	0	NA	5	0.7145	0.1038	NA	Both	UBL3_exon_chr13:30341444
DENND3	25.7759	115.387	2.1736	0	UP	No	Yes	1	DENND3_exon_chr8:142202624	1	1	0	NA	3	0.3613	0.0159	-0.3454	Shortening	DENND3_exon_chr8:142202624
C6orf141	20.9607	93.6482	2.1722	0	UP	No	Yes	3	C6orf141_exon_chr6:49518380_x000D_ C6orf141_exon_chr6:49528246_x000D_ C6orf141_exon_chr6:49529416	0.3014_x000D_ 0.1297_x000D_ 0.5688	0.293_x000D_ 0.0583_x000D_ 0.6486	-0.0084_x000D_ -0.0714_x000D_ 0.0798	NA_x000D_ NA_x000D_ NA	1_x000D_ 2_x000D_ 1	1.0_x000D_ NA_x000D_ 1.0	1.0_x000D_ NA_x000D_ 1.0	1.0_x000D_ NA_x000D_ 1.0	NA_x000D_ Shortening_x000D_ NA	C6orf141_exon_chr6:49518380	C6orf141_exon_chr6:49528246	C6orf141_exon_chr6:49529416
GCNT3	2.2922	9.5048	2.1714	0.1422	NC	No	No	1	GCNT3_exon_chr15:59910377	1	1	0	NA	2	NA	NA	NA	NA	GCNT3_exon_chr15:59910377
GLB1L	1.8072	7.6346	2.169	0.2485	NC	No	No	1	GLB1L_exon_chr2:220102069	1	1	0	NA	1	1	1	1	NA	GLB1L_exon_chr2:220102069
KLK13	0.3881	1.5923	2.167	1	NC	No	No	1	KLK13_exon_chr19:51560032	1	1	0	NA	1	1	1	1	NA	KLK13_exon_chr19:51560032
LINC00324	1.1526	5.534	2.1658	0.5913	NC	No	No	1	LINC00324_exon_chr17:8124827	1	1	0	NA	1	1	1	1	NA	LINC00324_exon_chr17:8124827
TMEM88	0.7398	3.1846	2.1649	1	NC	No	No	1	TMEM88_exon_chr17:7758762	1	1	0	NA	1	1	1	1	NA	TMEM88_exon_chr17:7758762
FAM184A	0.7398	3.0514	2.1628	1	NC	No	No	1	FAM184A_exon_chr6:119281349	1	1	0	NA	1	1	1	1	NA	FAM184A_exon_chr6:119281349
H3C4	0.7762	3.1442	2.1608	1	NC	No	No	1	H3C4_exon_chr6:26197514	1	1	0	NA	2	NA	NA	NA	NA	H3C4_exon_chr6:26197514
CACNA1G	2.3053	10.7932	2.1595	0.4391	NC	No	No	1	CACNA1G_exon_chr17:48703377	1	1	0	NA	2	NA	NA	NA	NA	CACNA1G_exon_chr17:48703377
FAM95B1	8.3337	37.4932	2.1588	0.0043	UP	No	No	2	FAM95B1_exon_chr9:42473935_x000D_ FAM95B1_exon_chr9:43027965	0.4921_x000D_ 0.5079	0.5_x000D_ 0.5	0.0079_x000D_ -0.0079	NA_x000D_ NA	1_x000D_ 1	1.0_x000D_ 1.0	1.0_x000D_ 1.0	1.0_x000D_ 1.0	NA_x000D_ NA	FAM95B1_exon_chr9:42473935	FAM95B1_exon_chr9:43027965
TRPM2-AS	0.3881	1.5923	2.1552	1	NC	No	No	1	TRPM2-AS_exon_chr21:45834827	1	1	0	NA	1	1	1	1	NA	TRPM2-AS_exon_chr21:45834827
CLASP1	10.9042	47.2594	2.1538	0	UP	No	Yes	1	CLASP1_exon_chr2:122098523	1	1	0	NA	7	NA	NA	NA	Both	CLASP1_exon_chr2:122098523
LINC00460	0.8978	4.1872	2.1514	0.6373	NC	No	No	1	LINC00460_exon_chr13:107029547	1	1	0	NA	2	NA	NA	NA	NA	LINC00460_exon_chr13:107029547
SAPCD1-AS1	1.6623	8.0107	2.1492	0.2419	NC	No	No	1	SAPCD1-AS1_exon_chr6:31732497	1	1	0	NA	1	1	1	1	NA	SAPCD1-AS1_exon_chr6:31732497
ANKRD20A4-ANKRD20A20P	4.1002	18.4056	2.139	0.0313	UP	No	No	1	ANKRD20A4-ANKRD20A20P_exon_chr9:69481374	1	1	0	NA	1	1	1	1	NA	ANKRD20A4-ANKRD20A20P_exon_chr9:69481374
PTPRK	31.5396	138.988	2.1368	0	UP	Yes	Yes	2	PTPRK_exon_chr6:128291425_x000D_ PTPRK_exon_chr6:128330413	0.765_x000D_ 0.235	0.8933_x000D_ 0.1067	0.1283_x000D_ -0.1283	Up_x000D_ NA	2_x000D_ 1	0.826_x000D_ 1.0	0.1451_x000D_ 1.0	-0.6809_x000D_ 1.0	Shortening_x000D_ NA	PTPRK_exon_chr6:128291425	PTPRK_exon_chr6:128330413
EPDR1	18.2335	81.6262	2.1365	0	UP	No	Yes	1	EPDR1_exon_chr7:37989801	1	1	0	NA	3	0.6274	0.2696	-0.3578	Both	EPDR1_exon_chr7:37989801
SLC6A16	0.3517	1.5432	2.1352	1	NC	No	No	1	SLC6A16_exon_chr19:49793649	1	1	0	NA	1	1	1	1	NA	SLC6A16_exon_chr19:49793649
LINC01011	0.9583	4.2335	2.1341	1	NC	No	No	1	LINC01011_exon_chr6:2990102	1	1	0	NA	1	1	1	1	NA	LINC01011_exon_chr6:2990102
SYNJ1	3.4937	15.492	2.134	0.0185	UP	No	Yes	1	SYNJ1_exon_chr21:34004111	1	1	0	NA	2	NA	NA	NA	Shortening	SYNJ1_exon_chr21:34004111
MSRB3	22.6972	101.031	2.1312	0	UP	No	Yes	1	MSRB3_exon_chr12:65856934	1	1	0	NA	2	0.3224	0.032	-0.2905	Shortening	MSRB3_exon_chr12:65856934
SKA2	334.659	1464.39	2.1301	0	UP	No	Yes	1	SKA2_exon_chr17:57189706	1	1	0	NA	13	0.3125	0.2129	-0.0996	Shortening	SKA2_exon_chr17:57189706
AFG1L	1.7839	8.9003	2.1279	0.1513	NC	No	No	1	AFG1L_exon_chr6:108843499	1	1	0	NA	1	1	1	1	NA	AFG1L_exon_chr6:108843499
KATNAL1	18.3181	81.3583	2.1273	0	UP	No	Yes	1	KATNAL1_exon_chr13:30782875	1	1	0	NA	6	0.7233	0.0858	-0.6374	Shortening	KATNAL1_exon_chr13:30782875
ZNF669	8.7452	37.585	2.1235	0.0013	UP	No	No	1	ZNF669_exon_chr1:247264621	1	1	0	NA	3	NA	NA	NA	NA	ZNF669_exon_chr1:247264621
NRG2	1.8072	7.3863	2.1228	0.1978	NC	No	No	1	NRG2_exon_chr5:139228282	1	1	0	NA	1	1	1	1	NA	NRG2_exon_chr5:139228282
FRRS1	7.6309	34.0008	2.1228	0.0019	UP	No	Yes	1	FRRS1_exon_chr1:100174676	1	1	0	NA	3	NA	NA	NA	Both	FRRS1_exon_chr1:100174676
MTURN	7.9346	36.016	2.1052	0.0007	UP	No	Yes	1	MTURN_exon_chr7:30197053	1	1	0	NA	2	NA	NA	NA	Shortening	MTURN_exon_chr7:30197053
MMP9	0.3517	1.5027	2.1013	1	NC	No	No	1	MMP9_exon_chr20:44644888	1	1	0	NA	1	1	1	1	NA	MMP9_exon_chr20:44644888
HOXD3	0.3881	1.5027	2.0999	1	NC	No	No	1	HOXD3_exon_chr2:177036244	1	1	0	NA	1	1	1	1	NA	HOXD3_exon_chr2:177036244
TMEM37	1.9405	7.5627	2.0995	0.2005	NC	No	No	1	TMEM37_exon_chr2:120194464	1	1	0	NA	2	NA	NA	NA	NA	TMEM37_exon_chr2:120194464
LOC101929372	0.3881	1.5027	2.0992	1	NC	No	No	1	LOC101929372_exon_chr22:18071958	1	1	0	NA	1	1	1	1	NA	LOC101929372_exon_chr22:18071958
CSF2RA	5.943	24.0665	2.0992	0.0246	UP	No	No	2	CSF2RA_exon_chrX:1428294_x000D_ CSF2RA_exon_chrY:1378294	0.3041_x000D_ 0.6959	0.4381_x000D_ 0.5619	0.1339_x000D_ -0.1339	Up_x000D_ NA	1_x000D_ 1	1.0_x000D_ 1.0	1.0_x000D_ 1.0	1.0_x000D_ 1.0	NA_x000D_ NA	CSF2RA_exon_chrX:1428294	CSF2RA_exon_chrY:1378294
PRNCR1	1.1643	4.615	2.0985	0.9947	NC	No	No	1	PRNCR1_exon_chr8:128092118	1	1	0	NA	1	1	1	1	NA	PRNCR1_exon_chr8:128092118
HERC6	1.1526	5.2621	2.0969	0.2768	NC	No	No	2	HERC6_exon_chr4:89334228_x000D_ HERC6_exon_chr4:89363385	0.0_x000D_ 1.0	0.2577_x000D_ 0.7423	0.2577_x000D_ -0.2577	NA_x000D_ NA	1_x000D_ 1	1.0_x000D_ 1.0	1.0_x000D_ 1.0	1.0_x000D_ 1.0	NA_x000D_ NA	HERC6_exon_chr4:89334228	HERC6_exon_chr4:89363385
GATA2	10.2873	44.5536	2.0958	0.0001	UP	No	No	1	GATA2_exon_chr3:128200161	1	1	0	NA	3	NA	NA	NA	NA	GATA2_exon_chr3:128200161
ULK4P1	11.425	48.4182	2.0948	0.0941	UP	No	No	3	ULK4P1_exon_chr15:30423330_x000D_ ULK4P1_exon_chr15:30892304_x000D_ ULK4P1_exon_chr15:32699418	0.3333_x000D_ 0.3333_x000D_ 0.3333	0.3333_x000D_ 0.3333_x000D_ 0.3333	0.0_x000D_ 0.0_x000D_ 0.0	NA_x000D_ NA_x000D_ NA	1_x000D_ 1_x000D_ 1	1.0_x000D_ 1.0_x000D_ 1.0	1.0_x000D_ 1.0_x000D_ 1.0	1.0_x000D_ 1.0_x000D_ 1.0	NA_x000D_ NA_x000D_ NA	ULK4P1_exon_chr15:30423330	ULK4P1_exon_chr15:30892304	ULK4P1_exon_chr15:32699418
BRI3BP	304.5	1304.33	2.0937	0	UP	No	Yes	1	BRI3BP_exon_chr12:125509536	1	1	0	NA	5	0.4111	0.0357	-0.3753	Both	BRI3BP_exon_chr12:125509536
MIR193BHG	0.8978	3.9243	2.0882	1	NC	No	No	1	MIR193BHG_exon_chr16:14419869	1	1	0	NA	1	1	1	1	NA	MIR193BHG_exon_chr16:14419869
RAET1E	0.7645	3.6961	2.0843	0.9098	NC	No	No	1	RAET1E_exon_chr6:150205640	1	1	0	NA	2	NA	NA	NA	NA	RAET1E_exon_chr6:150205640
ETV6	3.3363	14.6832	2.0833	0.065	UP	No	No	1	ETV6_exon_chr12:12043874	1	1	0	NA	3	NA	NA	NA	NA	ETV6_exon_chr12:12043874
SHLD1	7.2663	31.1143	2.0787	0.0007	UP	No	No	2	SHLD1_exon_chr20:5753777_x000D_ SHLD1_exon_chr20:5843669	0.8632_x000D_ 0.1368	0.8797_x000D_ 0.1203	0.0165_x000D_ -0.0165	NA_x000D_ NA	1_x000D_ 1	1.0_x000D_ 1.0	1.0_x000D_ 1.0	1.0_x000D_ 1.0	NA_x000D_ NA	SHLD1_exon_chr20:5753777	SHLD1_exon_chr20:5843669
RPEL1	0.7762	3.0082	2.078	1	NC	No	No	1	RPEL1_exon_chr10:105005643	1	1	0	NA	1	1	1	1	NA	RPEL1_exon_chr10:105005643
ZNF155	0.5097	2.4448	2.0773	1	NC	No	No	1	ZNF155_exon_chr19:44500244	1	1	0	NA	1	1	1	1	NA	ZNF155_exon_chr19:44500244
ROPN1B	0.6429	2.6903	2.0719	1	NC	No	No	1	ROPN1B_exon_chr3:125702096	1	1	0	NA	1	1	1	1	NA	ROPN1B_exon_chr3:125702096
SGPP2	0.3881	1.4709	2.071	1	NC	No	No	1	SGPP2_exon_chr2:223423065	1	1	0	NA	1	1	1	1	NA	SGPP2_exon_chr2:223423065
SLC25A21-AS1	2.4502	9.8803	2.0697	0.2039	NC	No	No	1	SLC25A21-AS1_exon_chr14:37641230	1	1	0	NA	1	1	1	1	NA	SLC25A21-AS1_exon_chr14:37641230
PDE7A	6.7826	30.3137	2.068	0.0037	UP	No	Yes	1	PDE7A_exon_chr8:66631730	1	1	0	NA	3	NA	NA	NA	Shortening	PDE7A_exon_chr8:66631730
ODF3B	1.3827	5.4498	2.0648	0.6028	NC	No	No	1	ODF3B_exon_chr22:50968989	1	1	0	NA	1	1	1	1	NA	ODF3B_exon_chr22:50968989
MARVELD2	8.5666	36.538	2.0621	0.1948	NC	No	Yes	1	MARVELD2_exon_chr5:68737358	1	1	0	NA	5	NA	NA	NA	Both	MARVELD2_exon_chr5:68737358
TAF13	9.498	39.2342	2.0618	0.0001	UP	Yes	No	2	TAF13_exon_chr1:109607315_x000D_ TAF13_exon_chr1:109617687	0.1594_x000D_ 0.8406	0.8084_x000D_ 0.1916	0.649_x000D_ -0.649	Up_x000D_ NA	1_x000D_ 1	1.0_x000D_ 1.0	1.0_x000D_ 1.0	1.0_x000D_ 1.0	NA_x000D_ NA	TAF13_exon_chr1:109607315	TAF13_exon_chr1:109617687
ZSWIM8-AS1	1.2495	5.2621	2.0615	0.7526	NC	No	No	1	ZSWIM8-AS1_exon_chr10:75557347	1	1	0	NA	1	1	1	1	NA	ZSWIM8-AS1_exon_chr10:75557347
AADAC	3.3247	14.7777	2.0594	0.0972	UP	No	No	1	AADAC_exon_chr3:151545363	1	1	0	NA	2	NA	NA	NA	NA	AADAC_exon_chr3:151545363
SNX4	40.5053	169.791	2.0584	0	UP	No	Yes	2	SNX4_exon_chr3:125166670_x000D_ SNX4_exon_chr3:125172799	0.7875_x000D_ 0.2125	0.7761_x000D_ 0.2239	-0.0114_x000D_ 0.0114	NA_x000D_ NA	1_x000D_ 3	1.0_x000D_ 0.708	1.0_x000D_ 0.0501	1.0_x000D_ -0.6579	NA_x000D_ Shortening	SNX4_exon_chr3:125166670	SNX4_exon_chr3:125172799
ZNF430	6.9255	27.9055	2.0557	0.0207	UP	No	Yes	1	ZNF430_exon_chr19:21239436	1	1	0	NA	2	NA	NA	NA	Shortening	ZNF430_exon_chr19:21239436
DPYD	0.3881	1.439	2.0506	1	NC	No	No	1	DPYD_exon_chr1:97544702	1	1	0	NA	1	1	1	1	NA	DPYD_exon_chr1:97544702
DCAF6	63.5872	262.3	2.0472	0	UP	No	Yes	1	DCAF6_exon_chr1:168044608	1	1	0	NA	3	0.8678	0.2639	-0.6039	Shortening	DCAF6_exon_chr1:168044608
CENPI	10.99	45.0796	2.0444	0.0001	UP	No	Yes	3	CENPI_exon_chrX:100357262_x000D_ CENPI_exon_chrX:100402931_x000D_ CENPI_exon_chrX:100417821	0.2475_x000D_ 0.1457_x000D_ 0.6068	0.201_x000D_ 0.1397_x000D_ 0.6592	-0.0464_x000D_ -0.006_x000D_ 0.0524	NA_x000D_ NA_x000D_ NA	1_x000D_ 1_x000D_ 2	1.0_x000D_ 1.0_x000D_ NA	1.0_x000D_ 1.0_x000D_ NA	1.0_x000D_ 1.0_x000D_ NA	NA_x000D_ NA_x000D_ Shortening	CENPI_exon_chrX:100357262	CENPI_exon_chrX:100402931	CENPI_exon_chrX:100417821
MED12L	1.031	4.1149	2.0433	1	NC	No	No	1	MED12L_exon_chr3:151150539	1	1	0	NA	2	NA	NA	NA	NA	MED12L_exon_chr3:151150539
CELSR3	0.7645	3.7366	2.0432	0.4404	NC	No	No	1	CELSR3_exon_chr3:48675665	1	1	0	NA	1	1	1	1	NA	CELSR3_exon_chr3:48675665
KIAA1328	0.6429	2.6094	2.0398	1	NC	No	No	2	KIAA1328_exon_chr18:34465519_x000D_ KIAA1328_exon_chr18:34801979	0.0_x000D_ 1.0	0.7898_x000D_ 0.2102	0.7898_x000D_ -0.7898	NA_x000D_ NA	1_x000D_ 1	1.0_x000D_ 1.0	1.0_x000D_ 1.0	1.0_x000D_ 1.0	NA_x000D_ NA	KIAA1328_exon_chr18:34465519	KIAA1328_exon_chr18:34801979
COG3	11.1734	47.0453	2.0349	0.0003	UP	No	Yes	1	COG3_exon_chr13:46108836	1	1	0	NA	4	NA	NA	NA	Both	COG3_exon_chr13:46108836
TSGA10	3.7973	16.4599	2.0346	0.027	UP	No	No	2	TSGA10_exon_chr2:99614684_x000D_ TSGA10_exon_chr2:99764811	0.0_x000D_ 1.0	0.1284_x000D_ 0.8716	0.1284_x000D_ -0.1284	NA_x000D_ NA	1_x000D_ 1	1.0_x000D_ 1.0	1.0_x000D_ 1.0	1.0_x000D_ 1.0	NA_x000D_ NA	TSGA10_exon_chr2:99614684	TSGA10_exon_chr2:99764811
TBC1D9	68.4644	280.068	2.0314	0	UP	No	Yes	1	TBC1D9_exon_chr4:141544071	1	1	0	NA	2	0.6041	0.0438	-0.5603	Shortening	TBC1D9_exon_chr4:141544071
LOC102725021	0.8978	3.7566	2.0277	0.9724	NC	No	No	2	LOC102725021_exon_chr15:30902255_x000D_ LOC102725021_exon_chr15:30917981	1.0_x000D_ 0.0	1.0_x000D_ 0.0	0.0_x000D_ 0.0	NA_x000D_ NA	1_x000D_ 1	1.0_x000D_ 1.0	1.0_x000D_ 1.0	1.0_x000D_ 1.0	NA_x000D_ NA	LOC102725021_exon_chr15:30902255	LOC102725021_exon_chr15:30917981
ANKRD6	0.7762	2.8781	2.0257	1	NC	No	No	1	ANKRD6_exon_chr6:90340151	1	1	0	NA	1	1	1	1	NA	ANKRD6_exon_chr6:90340151
COL4A5	6.999	27.898	2.0217	0.0005	UP	No	Yes	1	COL4A5_exon_chrX:107939526	1	1	0	NA	5	NA	NA	NA	Both	COL4A5_exon_chrX:107939526
LPP	35.3613	144.771	2.0214	0	UP	No	Yes	1	LPP_exon_chr3:188592138	1	1	0	NA	2	0.9251	0.0997	-0.8254	Shortening	LPP_exon_chr3:188592138
KIAA1217	8.7464	35.3595	2.0192	0.0032	UP	No	Yes	2	KIAA1217_exon_chr10:24831811_x000D_ KIAA1217_exon_chr10:24833909	0.0735_x000D_ 0.9265	0.1268_x000D_ 0.8732	0.0532_x000D_ -0.0532	NA_x000D_ NA	5_x000D_ 1	NA_x000D_ 1.0	NA_x000D_ 1.0	NA_x000D_ 1.0	Both_x000D_ NA	KIAA1217_exon_chr10:24831811	KIAA1217_exon_chr10:24833909
SELL	1.7586	6.9443	2.0179	0.8286	NC	No	No	1	SELL_exon_chr1:169660943	1	1	0	NA	3	NA	NA	NA	NA	SELL_exon_chr1:169660943
FAM160B1	66.6218	272.037	2.0179	0	UP	No	No	1	FAM160B1_exon_chr10:116621193	1	1	0	NA	1	1	1	1	NA	FAM160B1_exon_chr10:116621193
SH3RF2	13.3446	54.7291	2.0132	0	UP	No	Yes	1	SH3RF2_exon_chr5:145441988	1	1	0	NA	2	NA	NA	NA	Shortening	SH3RF2_exon_chr5:145441988
SPRY3	0.6066	2.5749	2.0125	1	NC	No	No	1	SPRY3_exon_chrY:59106433	1	1	0	NA	1	1	1	1	NA	SPRY3_exon_chrY:59106433
PCAT19	0.2548	1.3754	2.0112	1	NC	No	No	1	PCAT19_exon_chr19:42006559	1	1	0	NA	1	1	1	1	NA	PCAT19_exon_chr19:42006559
TMEM106A	2.3046	9.23	2.0111	0.1668	NC	No	No	1	TMEM106A_exon_chr17:41369699	1	1	0	NA	1	1	1	1	NA	TMEM106A_exon_chr17:41369699
SNORD13	2.3651	9.3483	2.0094	0.2138	NC	No	No	1	SNORD13_exon_chr8:33370992	1	1	0	NA	2	NA	NA	NA	NA	SNORD13_exon_chr8:33370992
LIPG	1.6623	7.039	2.0089	0.7864	NC	No	No	1	LIPG_exon_chr18:47116870	1	1	0	NA	2	NA	NA	NA	NA	LIPG_exon_chr18:47116870
TMEM61	3.6028	14.4726	2.0072	0.1216	NC	No	No	1	TMEM61_exon_chr1:55457508	1	1	0	NA	1	1	1	1	NA	TMEM61_exon_chr1:55457508
RASA2	7.6309	31.4753	2.0038	0.0012	UP	No	Yes	2	RASA2_exon_chr3:141328718_x000D_ RASA2_exon_chr3:141331124	0.0_x000D_ 1.0	0.3412_x000D_ 0.6588	0.3412_x000D_ -0.3412	Up_x000D_ Down	4_x000D_ 1	NA_x000D_ 1.0	NA_x000D_ 1.0	NA_x000D_ 1.0	Both_x000D_ NA	RASA2_exon_chr3:141328718	RASA2_exon_chr3:141331124
C1orf116	2.4743	9.4291	2.0035	0.1912	NC	No	No	1	C1orf116_exon_chr1:207196825	1	1	0	NA	3	NA	NA	NA	NA	C1orf116_exon_chr1:207196825
TSC22D3	13.5369	53.0099	2.0007	0.0003	UP	No	No	1	TSC22D3_exon_chrX:106957979	1	1	0	NA	1	1	1	1	NA	TSC22D3_exon_chrX:106957979
FBLIM1	0.8978	3.7047	1.9977	1	NC	No	No	1	FBLIM1_exon_chr1:16111042	1	1	0	NA	1	1	1	1	NA	FBLIM1_exon_chr1:16111042
CRIM1	22.397	91.9302	1.9877	0	UP	No	Yes	1	CRIM1_exon_chr2:36775667	1	1	0	NA	6	NA	NA	NA	Both	CRIM1_exon_chr2:36775667
LOC646736	3.0931	11.8534	1.9823	0.2631	NC	No	No	1	LOC646736_exon_chr2:227044515	1	1	0	NA	1	1	1	1	NA	LOC646736_exon_chr2:227044515
HAGLR	0.5097	2.3811	1.9782	1	NC	No	No	1	HAGLR_exon_chr2:177041420	1	1	0	NA	2	NA	NA	NA	NA	HAGLR_exon_chr2:177041420
LINC00960	1.8313	6.9357	1.9782	0.888	NC	No	No	2	LINC00960_exon_chr3:75727983_x000D_ LINC00960_exon_chrUn:gl000222	0.4038_x000D_ 0.5962	0.5_x000D_ 0.5	0.0962_x000D_ -0.0962	NA_x000D_ NA	1_x000D_ 1	1.0_x000D_ 1.0	1.0_x000D_ 1.0	1.0_x000D_ 1.0	NA_x000D_ NA	LINC00960_exon_chr3:75727983	LINC00960_exon_chrUn:gl000222
DISP2	4.9128	19.1968	1.9781	0.0279	UP	No	Yes	1	DISP2_exon_chr15:40659258	1	1	0	NA	2	NA	NA	NA	Shortening	DISP2_exon_chr15:40659258
GABPB2	16.2799	64.7979	1.9683	0	UP	No	Yes	2	GABPB2_exon_chr1:151089867_x000D_ GABPB2_exon_chr1:151090432	0.1476_x000D_ 0.8524	0.0822_x000D_ 0.9178	-0.0655_x000D_ 0.0655	NA_x000D_ NA	1_x000D_ 3	1.0_x000D_ NA	1.0_x000D_ NA	1.0_x000D_ NA	NA_x000D_ Both	GABPB2_exon_chr1:151089867	GABPB2_exon_chr1:151090432
SAMD11	1.6623	7.0685	1.968	0.2623	NC	No	No	1	SAMD11_exon_chr1:879287	1	1	0	NA	1	1	1	1	NA	SAMD11_exon_chr1:879287
PIP5KL1	3.493	13.3136	1.9679	0.1514	NC	No	Yes	1	PIP5KL1_exon_chr9:130684393	1	1	0	NA	2	NA	NA	NA	Shortening	PIP5KL1_exon_chr9:130684393
CTF1	1.1643	4.0484	1.9648	1	NC	No	No	1	CTF1_exon_chr16:30913398	1	1	0	NA	1	1	1	1	NA	CTF1_exon_chr16:30913398
PROM2	2.5718	10.155	1.9646	0.1144	NC	No	No	1	PROM2_exon_chr2:95954971	1	1	0	NA	2	NA	NA	NA	NA	PROM2_exon_chr2:95954971
SLC40A1	0.7398	2.6499	1.958	1	NC	No	No	1	SLC40A1_exon_chr2:190426917	1	1	0	NA	1	1	1	1	NA	SLC40A1_exon_chr2:190426917
SMAP2	11.9612	46.8979	1.9535	0	UP	No	Yes	1	SMAP2_exon_chr1:40887647	1	1	0	NA	2	NA	NA	NA	Shortening	SMAP2_exon_chr1:40887647
CLEC4A	0.2548	1.3436	1.952	1	NC	No	No	1	CLEC4A_exon_chr12:8290735	1	1	0	NA	1	1	1	1	NA	CLEC4A_exon_chr12:8290735
GOLGA7B	1.7592	7.1436	1.9473	1	NC	No	No	1	GOLGA7B_exon_chr10:99625346	1	1	0	NA	2	NA	NA	NA	NA	GOLGA7B_exon_chr10:99625346
BCL2L11	35.0707	136.8	1.9464	0	UP	No	Yes	1	BCL2L11_exon_chr2:111921709	1	1	0	NA	6	0.9124	0.207	-0.7054	Both	BCL2L11_exon_chr2:111921709
CCDC30	5.4705	20.3958	1.943	0.0341	UP	No	No	1	CCDC30_exon_chr1:42938792	1	1	0	NA	1	1	1	1	NA	CCDC30_exon_chr1:42938792
TMEM171	2.5347	9.1982	1.9403	0.2153	NC	No	No	1	TMEM171_exon_chr5:72427364	1	1	0	NA	1	1	1	1	NA	TMEM171_exon_chr5:72427364
PPFIBP2	1.031	3.858	1.9336	1	NC	No	No	1	PPFIBP2_exon_chr11:7674254	1	1	0	NA	1	1	1	1	NA	PPFIBP2_exon_chr11:7674254
PDCL2	0.7645	3.176	1.9336	1	NC	No	No	1	PDCL2_exon_chr4:56422878	1	1	0	NA	1	1	1	1	NA	PDCL2_exon_chr4:56422878
LOC729080	14.2783	55.402	1.93	0	UP	No	No	1	LOC729080_exon_chr5:141276260	1	1	0	NA	1	1	1	1	NA	LOC729080_exon_chr5:141276260
NOCT	4.0034	15.6393	1.9298	0.0412	UP	No	No	1	NOCT_exon_chr4:139965792	1	1	0	NA	1	1	1	1	NA	NOCT_exon_chr4:139965792
LOC171391	2.2442	8.6263	1.9228	0.2668	NC	No	No	1	LOC171391_exon_chr11:783529	1	1	0	NA	1	1	1	1	NA	LOC171391_exon_chr11:783529
FRK	13.186	50.1703	1.9205	0.0002	UP	No	Yes	1	FRK_exon_chr6:116263788	1	1	0	NA	6	NA	NA	NA	Both	FRK_exon_chr6:116263788
ZC4H2	7.3877	27.8545	1.9163	0.0074	UP	No	Yes	1	ZC4H2_exon_chrX:64137776	1	1	0	NA	2	NA	NA	NA	Shortening	ZC4H2_exon_chrX:64137776
STIMATE-MUSTN1	10.7716	40.1209	1.9155	0.0001	UP	No	Yes	2	STIMATE-MUSTN1_exon_chr3:52867446_x000D_ STIMATE-MUSTN1_exon_chr3:52874626	0.3104_x000D_ 0.6896	0.0957_x000D_ 0.9043	-0.2148_x000D_ 0.2148	NA_x000D_ Up	2_x000D_ 1	NA_x000D_ 1.0	NA_x000D_ 1.0	NA_x000D_ 1.0	Shortening_x000D_ NA	STIMATE-MUSTN1_exon_chr3:52867446	STIMATE-MUSTN1_exon_chr3:52874626
RNF24	4.8887	18.1997	1.9073	0.0585	UP	No	No	1	RNF24_exon_chr20:3914848	1	1	0	NA	3	NA	NA	NA	NA	RNF24_exon_chr20:3914848
NRP1	1.1526	4.5427	1.9061	0.9992	NC	No	No	1	NRP1_exon_chr10:33486637	1	1	0	NA	1	1	1	1	NA	NRP1_exon_chr10:33486637
H3C12	0.3881	1.3641	1.9036	1	NC	No	No	1	H3C12_exon_chr6:27858604	1	1	0	NA	1	1	1	1	NA	H3C12_exon_chr6:27858604
OR51I1	4.3674	16.5845	1.9033	0.0736	UP	No	No	1	OR51I1_exon_chr11:5462783	1	1	0	NA	1	1	1	1	NA	OR51I1_exon_chr11:5462783
RBAK-RBAKDN	2.7175	10.5623	1.8983	0.171	NC	No	No	1	RBAK-RBAKDN_exon_chr7:5112552	1	1	0	NA	1	1	1	1	NA	RBAK-RBAKDN_exon_chr7:5112552
SCARNA14	2.9112	10.9207	1.8974	0.1681	NC	No	No	1	SCARNA14_exon_chr15:66639680	1	1	0	NA	1	1	1	1	NA	SCARNA14_exon_chr15:66639680
FAM229B	14.8339	53.8284	1.8963	0.0003	UP	No	No	1	FAM229B_exon_chr6:112421872	1	1	0	NA	1	1	1	1	NA	FAM229B_exon_chr6:112421872
SATB2-AS1	0	0.682	1.8941	1	NC	No	No	1	SATB2-AS1_exon_chr2:200334329	1	1	0	NA	1	1	1	1	NA	SATB2-AS1_exon_chr2:200334329
ARNTL	2.2936	9.5879	1.8924	0.1712	NC	No	No	1	ARNTL_exon_chr11:13408142	1	1	0	NA	2	NA	NA	NA	NA	ARNTL_exon_chr11:13408142
LINC01833	1.2495	4.6755	1.8921	0.7275	NC	No	No	1	LINC01833_exon_chr2:45158616	1	1	0	NA	1	1	1	1	NA	LINC01833_exon_chr2:45158616
GARS1-DT	3.9181	14.4721	1.8915	0.0568	UP	Yes	No	2	GARS1-DT_exon_chr7:30590397_x000D_ GARS1-DT_exon_chr7:30608605	0.1303_x000D_ 0.8697	0.0205_x000D_ 0.9795	-0.1098_x000D_ 0.1098	NA_x000D_ Up	1_x000D_ 1	1.0_x000D_ 1.0	1.0_x000D_ 1.0	1.0_x000D_ 1.0	NA_x000D_ NA	GARS1-DT_exon_chr7:30590397	GARS1-DT_exon_chr7:30608605
NOSTRIN	0.6429	2.358	1.8881	1	NC	No	No	1	NOSTRIN_exon_chr2:169721343	1	1	0	NA	1	1	1	1	NA	NOSTRIN_exon_chr2:169721343
MAN1A1	113.242	415.157	1.8856	0	UP	No	Yes	1	MAN1A1_exon_chr6:119501110	1	1	0	NA	5	0.9395	0.128	-0.8116	Shortening	MAN1A1_exon_chr6:119501110
LOC102723385	1.1526	4.4936	1.8845	0.9551	NC	No	No	1	LOC102723385_exon_chr16:19074217	1	1	0	NA	1	1	1	1	NA	LOC102723385_exon_chr16:19074217
MRAP2	1.2859	4.7073	1.884	0.8896	NC	No	No	1	MRAP2_exon_chr6:84798809	1	1	0	NA	1	1	1	1	NA	MRAP2_exon_chr6:84798809
PPM1N	3.1783	11.8163	1.8836	0.0615	UP	No	No	1	PPM1N_exon_chr19:46005274	1	1	0	NA	3	NA	NA	NA	NA	PPM1N_exon_chr19:46005274
SERPINB9	22.5628	82.6069	1.8824	0	UP	No	Yes	1	SERPINB9_exon_chr6:2890804	1	1	0	NA	6	NA	NA	NA	Both	SERPINB9_exon_chr6:2890804
LOC101928764	0	0.682	1.8801	1	NC	No	No	1	LOC101928764_exon_chr13:21861661	1	1	0	NA	1	1	1	1	NA	LOC101928764_exon_chr13:21861661
COX10-AS1	0.7762	2.5631	1.8756	1	NC	No	No	1	COX10-AS1_exon_chr17:13933888	1	1	0	NA	2	NA	NA	NA	NA	COX10-AS1_exon_chr17:13933888
C6orf120	17.7959	65.2302	1.8674	0	UP	No	Yes	1	C6orf120_exon_chr6:170102207	1	1	0	NA	7	0.8468	0.1204	-0.7264	Both	C6orf120_exon_chr6:170102207
MYPN	0	0.682	1.867	1	NC	No	No	1	MYPN_exon_chr10:69970042	1	1	0	NA	1	1	1	1	NA	MYPN_exon_chr10:69970042
NDFIP1	157.104	574.819	1.8668	0	UP	No	Yes	1	NDFIP1_exon_chr5:141531295	1	1	0	NA	5	0.6091	0.0498	-0.5593	Shortening	NDFIP1_exon_chr5:141531295
LOC441155	1.31	4.716	1.8637	1	NC	No	No	1	LOC441155_exon_chr6:66011913	1	1	0	NA	1	1	1	1	NA	LOC441155_exon_chr6:66011913
NFE4	0	0.682	1.8633	1	NC	No	No	1	NFE4_exon_chr7:102618827	1	1	0	NA	1	1	1	1	NA	NFE4_exon_chr7:102618827
TNFRSF13C	0.6429	2.3175	1.8622	1	NC	No	No	1	TNFRSF13C_exon_chr22:42321558	1	1	0	NA	1	1	1	1	NA	TNFRSF13C_exon_chr22:42321558
KIAA0319	3.0692	11.5887	1.8621	0.2384	NC	No	No	2	KIAA0319_exon_chr6:24547571_x000D_ KIAA0319_exon_chr6:24554859	0.5414_x000D_ 0.4586	0.754_x000D_ 0.246	0.2126_x000D_ -0.2126	NA_x000D_ NA	1_x000D_ 1	1.0_x000D_ 1.0	1.0_x000D_ 1.0	1.0_x000D_ 1.0	NA_x000D_ NA	KIAA0319_exon_chr6:24547571	KIAA0319_exon_chr6:24554859
SYCP2L	3.8811	13.5296	1.8558	0.1814	NC	No	No	2	SYCP2L_exon_chr6:10894099_x000D_ SYCP2L_exon_chr6:10974184	0.635_x000D_ 0.365	0.4091_x000D_ 0.5909	-0.2259_x000D_ 0.2259	NA_x000D_ NA	1_x000D_ 1	1.0_x000D_ 1.0	1.0_x000D_ 1.0	1.0_x000D_ 1.0	NA_x000D_ NA	SYCP2L_exon_chr6:10894099	SYCP2L_exon_chr6:10974184
RGMB	16.3748	58.0895	1.8551	0	UP	No	Yes	1	RGMB_exon_chr5:98128788	1	1	0	NA	3	NA	NA	NA	Shortening	RGMB_exon_chr5:98128788
LINC02008	18.5221	66.141	1.8537	0	UP	No	No	1	LINC02008_exon_chr3:82465270	1	1	0	NA	1	1	1	1	NA	LINC02008_exon_chr3:82465270
NR6A1	15.6493	57.2988	1.8528	0.0001	UP	No	Yes	1	NR6A1_exon_chr9:127285072	1	1	0	NA	4	NA	NA	NA	Both	NR6A1_exon_chr9:127285072
LINC00863	1.2742	5.2334	1.8481	1	NC	No	No	1	LINC00863_exon_chr10:89102167	1	1	0	NA	1	1	1	1	NA	LINC00863_exon_chr10:89102167
RNF44	72.3924	259.248	1.8444	0	UP	No	Yes	1	RNF44_exon_chr5:175956091	1	1	0	NA	4	0.5112	0.0787	-0.4325	Shortening	RNF44_exon_chr5:175956091
RNASEL	1.4068	4.8924	1.8442	1	NC	No	No	1	RNASEL_exon_chr1:182544713	1	1	0	NA	1	1	1	1	NA	RNASEL_exon_chr1:182544713
FAM47E	0.7762	2.5226	1.8403	1	NC	No	No	1	FAM47E_exon_chr4:77204533	1	1	0	NA	1	1	1	1	NA	FAM47E_exon_chr4:77204533
LOC729970	1.031	3.5052	1.8387	1	NC	No	No	1	LOC729970_exon_chr1:95428480	1	1	0	NA	1	1	1	1	NA	LOC729970_exon_chr1:95428480
LZTS1	3.0815	11.1687	1.8385	0.1472	NC	No	No	1	LZTS1_exon_chr8:20107874	1	1	0	NA	1	1	1	1	NA	LZTS1_exon_chr8:20107874
SHD	2.5106	8.5453	1.8362	0.2452	NC	No	No	1	SHD_exon_chr19:4290443	1	1	0	NA	1	1	1	1	NA	SHD_exon_chr19:4290443
MAP2	3.1049	10.7963	1.8339	0.2373	NC	No	No	1	MAP2_exon_chr2:210594905	1	1	0	NA	2	NA	NA	NA	NA	MAP2_exon_chr2:210594905
LINC02361	3.2031	11.9177	1.8327	0.2736	NC	No	No	1	LINC02361_exon_chr12:132672246	1	1	0	NA	1	1	1	1	NA	LINC02361_exon_chr12:132672246
NPHP3-ACAD11	2.5354	9.1377	1.8323	0.3341	NC	No	No	1	NPHP3-ACAD11_exon_chr3:132400934	1	1	0	NA	2	NA	NA	NA	NA	NPHP3-ACAD11_exon_chr3:132400934
SGSM1	0.7762	2.4853	1.83	1	NC	No	No	1	SGSM1_exon_chr22:25320152	1	1	0	NA	1	1	1	1	NA	SGSM1_exon_chr22:25320152
HOXA1	1.2859	4.5687	1.8299	1	NC	No	No	1	HOXA1_exon_chr7:27134414	1	1	0	NA	1	1	1	1	NA	HOXA1_exon_chr7:27134414
SLC44A5	1.4075	5.4677	1.8271	0.4319	NC	No	No	1	SLC44A5_exon_chr1:75669518	1	1	0	NA	2	NA	NA	NA	NA	SLC44A5_exon_chr1:75669518
LINC01909	0.7645	2.9735	1.8249	1	NC	No	No	1	LINC01909_exon_chr18:68019214	1	1	0	NA	1	1	1	1	NA	LINC01909_exon_chr18:68019214
DNAL1	10.1286	35.4104	1.8224	0.0026	UP	No	No	1	DNAL1_exon_chr14:74162604	1	1	0	NA	4	NA	NA	NA	NA	DNAL1_exon_chr14:74162604
DRD4	1.674	5.8723	1.8183	0.3858	NC	No	No	1	DRD4_exon_chr11:640400	1	1	0	NA	1	1	1	1	NA	DRD4_exon_chr11:640400
PCDHGA1	3.493	11.8686	1.8145	0.1257	NC	No	No	1	PCDHGA1_exon_chr5:140890513	1	1	0	NA	1	1	1	1	NA	PCDHGA1_exon_chr5:140890513
SLC6A20	0	0.6416	1.8144	1	NC	No	No	1	SLC6A20_exon_chr3:45800619	1	1	0	NA	1	1	1	1	NA	SLC6A20_exon_chr3:45800619
RGMB-AS1	1.031	3.5138	1.8141	1	NC	No	No	1	RGMB-AS1_exon_chr5:98106888	1	1	0	NA	1	1	1	1	NA	RGMB-AS1_exon_chr5:98106888
LSM11	8.9271	30.7708	1.814	0.0232	UP	No	Yes	1	LSM11_exon_chr5:157181861	1	1	0	NA	2	NA	NA	NA	Shortening	LSM11_exon_chr5:157181861
PRSS23	11.4763	41.0288	1.8129	0.0006	UP	No	No	1	PRSS23_exon_chr11:86518672	1	1	0	NA	1	1	1	1	NA	PRSS23_exon_chr11:86518672
TRHDE-AS1	3.2883	12.3187	1.8093	0.214	NC	No	No	1	TRHDE-AS1_exon_chr12:72649554	1	1	0	NA	2	NA	NA	NA	NA	TRHDE-AS1_exon_chr12:72649554
LINC01351	0	0.6416	1.804	1	NC	No	No	1	LINC01351_exon_chr1:190449474	1	1	0	NA	1	1	1	1	NA	LINC01351_exon_chr1:190449474
POU2F1	15.538	53.0069	1.8009	0.0002	UP	No	Yes	1	POU2F1_exon_chr1:167384736	1	1	0	NA	3	NA	NA	NA	Shortening	POU2F1_exon_chr1:167384736
LY6K	0.5097	1.9652	1.7976	1	NC	No	No	1	LY6K_exon_chr8:143784261	1	1	0	NA	1	1	1	1	NA	LY6K_exon_chr8:143784261
CEBPA-DT	0.7398	2.3985	1.7953	1	NC	No	No	1	CEBPA-DT_exon_chr19:33793726	1	1	0	NA	1	1	1	1	NA	CEBPA-DT_exon_chr19:33793726
SMURF1	36.9048	131.323	1.795	0	UP	No	Yes	1	SMURF1_exon_chr7:98628306	1	1	0	NA	2	0.7554	0.0962	-0.6591	Shortening	SMURF1_exon_chr7:98628306
DPF3	1.9893	6.8547	1.7943	1	NC	No	No	1	DPF3_exon_chr14:73190436	1	1	0	NA	1	1	1	1	NA	DPF3_exon_chr14:73190436
DSTNP2	5.2652	18.4943	1.7936	0.0599	UP	No	No	1	DSTNP2_exon_chr12:6993144	1	1	0	NA	1	1	1	1	NA	DSTNP2_exon_chr12:6993144
VPS26B	21.9941	76.3204	1.7896	0.0002	UP	No	Yes	1	VPS26B_exon_chr11:134115337	1	1	0	NA	3	NA	NA	NA	Shortening	VPS26B_exon_chr11:134115337
ZNF70	0.9583	3.3406	1.789	1	NC	No	No	1	ZNF70_exon_chr22:24087406	1	1	0	NA	2	NA	NA	NA	NA	ZNF70_exon_chr22:24087406
SLCO1B3	6.0785	22.0115	1.7863	0.0462	UP	No	Yes	2	SLCO1B3_exon_chr12:21032369_x000D_ SLCO1B3_exon_chr12:21068937	0.0_x000D_ 1.0	0.2182_x000D_ 0.7818	0.2182_x000D_ -0.2182	NA_x000D_ NA	2_x000D_ 1	NA_x000D_ 1.0	NA_x000D_ 1.0	NA_x000D_ 1.0	Shortening_x000D_ NA	SLCO1B3_exon_chr12:21032369	SLCO1B3_exon_chr12:21068937
UBL7-AS1	9.6071	32.7849	1.7851	0.0082	UP	No	No	1	UBL7-AS1_exon_chr15:74773391	1	1	0	NA	1	1	1	1	NA	UBL7-AS1_exon_chr15:74773391
RGL1	0.2548	1.2108	1.784	1	NC	No	No	1	RGL1_exon_chr1:183895238	1	1	0	NA	3	NA	NA	NA	NA	RGL1_exon_chr1:183895238
PIGA	9.123	32.2349	1.7834	0.0036	UP	No	Yes	1	PIGA_exon_chrX:15339894	1	1	0	NA	2	NA	NA	NA	Shortening	PIGA_exon_chrX:15339894
MPP5	27.3909	94.8663	1.7818	0	UP	No	Yes	1	MPP5_exon_chr14:67799496	1	1	0	NA	3	0.5927	0.2083	-0.3844	Both	MPP5_exon_chr14:67799496
OTUB2	4.2692	14.1111	1.7812	0.1289	NC	No	No	1	OTUB2_exon_chr14:94512061	1	1	0	NA	2	NA	NA	NA	NA	OTUB2_exon_chr14:94512061
RMRP	0.2548	1.2021	1.7785	1	NC	No	No	1	RMRP_exon_chr9:35658015	1	1	0	NA	1	1	1	1	NA	RMRP_exon_chr9:35658015
LINC00853	0.2548	1.2021	1.7784	1	NC	No	No	1	LINC00853_exon_chr1:47645539	1	1	0	NA	1	1	1	1	NA	LINC00853_exon_chr1:47645539
SDHAF4	33.938	115.342	1.7765	0.0117	UP	No	Yes	1	SDHAF4_exon_chr6:71298317	1	1	0	NA	2	0.3102	0.1843	-0.1259	Shortening	SDHAF4_exon_chr6:71298317
LINC00337	2.172	8.207	1.7724	0.2558	NC	No	No	1	LINC00337_exon_chr1:6298280	1	1	0	NA	1	1	1	1	NA	LINC00337_exon_chr1:6298280
FOXN3	12.931	43.7752	1.7708	0.0057	UP	No	Yes	1	FOXN3_exon_chr14:89629313	1	1	0	NA	2	NA	NA	NA	Shortening	FOXN3_exon_chr14:89629313
PRKAA2	5.823	20.205	1.7694	0.0859	UP	No	Yes	1	PRKAA2_exon_chr1:57173147	1	1	0	NA	3	NA	NA	NA	Shortening	PRKAA2_exon_chr1:57173147
ATXN1	15.3436	51.3436	1.768	0.001	UP	No	Yes	2	ATXN1_exon_chr6:16307090_x000D_ ATXN1_exon_chr6:16740149	0.8824_x000D_ 0.1176	0.8403_x000D_ 0.1597	-0.0421_x000D_ 0.0421	NA_x000D_ NA	3_x000D_ 7	NA_x000D_ NA	NA_x000D_ NA	NA_x000D_ NA	NA_x000D_ Both	ATXN1_exon_chr6:16307090	ATXN1_exon_chr6:16740149
ULK4	1.2859	4.3868	1.7665	1	NC	No	No	1	ULK4_exon_chr3:41288483	1	1	0	NA	2	NA	NA	NA	NA	ULK4_exon_chr3:41288483
DDX11L16	2.8383	9.1664	1.7621	0.2184	NC	No	No	1	DDX11L16_exon_chrX:155256502	1	1	0	NA	1	1	1	1	NA	DDX11L16_exon_chrX:155256502
LINC00265	1.4075	5.0397	1.7617	1	NC	No	No	1	LINC00265_exon_chr7:39831342	1	1	0	NA	1	1	1	1	NA	LINC00265_exon_chr7:39831342
MYO1E	12.9318	44.0973	1.7617	0.0002	UP	No	Yes	2	MYO1E_exon_chr15:59429655_x000D_ MYO1E_exon_chr15:59553708	0.7815_x000D_ 0.2185	0.8124_x000D_ 0.1876	0.0309_x000D_ -0.0309	NA_x000D_ NA	1_x000D_ 2	1.0_x000D_ NA	1.0_x000D_ NA	1.0_x000D_ NA	NA_x000D_ Lengthening	MYO1E_exon_chr15:59429655	MYO1E_exon_chr15:59553708
ACER2	0.3881	1.179	1.7609	1	NC	No	No	1	ACER2_exon_chr9:19450447	1	1	0	NA	1	1	1	1	NA	ACER2_exon_chr9:19450447
ANKEF1	18.2088	62.2389	1.7602	0	UP	No	Yes	1	ANKEF1_exon_chr20:10036149	1	1	0	NA	3	0.5161	0.3551	-0.1609	Both	ANKEF1_exon_chr20:10036149
SLC41A2	2.0621	6.8636	1.7588	0.4337	NC	No	No	1	SLC41A2_exon_chr12:105199115	1	1	0	NA	3	NA	NA	NA	NA	SLC41A2_exon_chr12:105199115
TSPAN9	16.5115	57.9712	1.7576	0	UP	No	Yes	1	TSPAN9_exon_chr12:3392210	1	1	0	NA	3	0.4193	0.0931	NA	Shortening	TSPAN9_exon_chr12:3392210
HSPB8	0	0.6097	1.7561	1	NC	No	No	1	HSPB8_exon_chr12:119631503	1	1	0	NA	1	1	1	1	NA	HSPB8_exon_chr12:119631503
TMC7	2.0134	6.6811	1.7546	0.3654	NC	No	No	1	TMC7_exon_chr16:19073099	1	1	0	NA	2	NA	NA	NA	NA	TMC7_exon_chr16:19073099
WDYHV1	27.2809	91.6896	1.7518	0	UP	No	Yes	1	WDYHV1_exon_chr8:124453545	1	1	0	NA	3	0.7118	0.0658	-0.646	Shortening	WDYHV1_exon_chr8:124453545
SLIT2	0.3881	1.1703	1.7496	1	NC	No	No	1	SLIT2_exon_chr4:20620390	1	1	0	NA	1	1	1	1	NA	SLIT2_exon_chr4:20620390
ABL2	22.4561	77.6623	1.7495	0	UP	No	Yes	1	ABL2_exon_chr1:179078576	1	1	0	NA	4	0.1693	0.0278	-0.1415	Shortening	ABL2_exon_chr1:179078576
ZNF81	0.3881	1.1703	1.7488	1	NC	No	No	1	ZNF81_exon_chrX:47774322	1	1	0	NA	1	1	1	1	NA	ZNF81_exon_chrX:47774322
CHMP4C	13.4527	45.1172	1.7476	0.0003	UP	No	Yes	1	CHMP4C_exon_chr8:82670714	1	1	0	NA	2	0.9065	0.3788	NA	Shortening	CHMP4C_exon_chr8:82670714
ACTR3C	0.3517	1.1703	1.7448	1	NC	No	No	1	ACTR3C_exon_chr7:149946143	1	1	0	NA	1	1	1	1	NA	ACTR3C_exon_chr7:149946143
ZNF441	0	0.6011	1.7415	1	NC	No	No	1	ZNF441_exon_chr19:11890833	1	1	0	NA	1	1	1	1	NA	ZNF441_exon_chr19:11890833
ZSCAN16-AS1	18.5208	60.9112	1.7411	0.0014	UP	No	No	1	ZSCAN16-AS1_exon_chr6:28090989	1	1	0	NA	2	NA	NA	NA	NA	ZSCAN16-AS1_exon_chr6:28090989
COL4A6	0	0.6011	1.7404	1	NC	No	No	1	COL4A6_exon_chrX:107400490	1	1	0	NA	1	1	1	1	NA	COL4A6_exon_chrX:107400490
EGF	0	0.6011	1.7401	1	NC	No	No	1	EGF_exon_chr4:110932357	1	1	0	NA	1	1	1	1	NA	EGF_exon_chr4:110932357
PPP1R13B	3.7128	13.0329	1.7398	0.1829	NC	No	Yes	1	PPP1R13B_exon_chr14:104201532	1	1	0	NA	2	NA	NA	NA	Shortening	PPP1R13B_exon_chr14:104201532
ZNF267	54.6581	181.758	1.7396	0	UP	No	Yes	1	ZNF267_exon_chr16:31925796	1	1	0	NA	3	0.5911	0.1669	-0.4242	Shortening	ZNF267_exon_chr16:31925796
CCDC126	4.6332	14.7787	1.7395	0.0662	UP	No	Yes	1	CCDC126_exon_chr7:23682549	1	1	0	NA	3	NA	NA	NA	Shortening	CCDC126_exon_chr7:23682549
THAP2	3.1654	10.3745	1.7393	0.3612	NC	No	No	1	THAP2_exon_chr12:72070468	1	1	0	NA	2	NA	NA	NA	NA	THAP2_exon_chr12:72070468
CCDC159	0.3881	1.1472	1.7373	1	NC	No	No	1	CCDC159_exon_chr19:11465548	1	1	0	NA	1	1	1	1	NA	CCDC159_exon_chr19:11465548
LRRC75B	1.6623	5.9499	1.7362	1	NC	No	No	1	LRRC75B_exon_chr22:24982379	1	1	0	NA	1	1	1	1	NA	LRRC75B_exon_chr22:24982379
ATP6V0E2-AS1	0.2548	1.1472	1.7341	1	NC	No	No	1	ATP6V0E2-AS1_exon_chr7:149566947	1	1	0	NA	1	1	1	1	NA	ATP6V0E2-AS1_exon_chr7:149566947
RARA-AS1	4.9003	15.8654	1.7286	0.2101	NC	No	No	1	RARA-AS1_exon_chr17:38497952	1	1	0	NA	2	NA	NA	NA	NA	RARA-AS1_exon_chr17:38497952
KIF24	7.2669	24.8437	1.7281	0.0365	UP	No	Yes	2	KIF24_exon_chr9:34254518_x000D_ KIF24_exon_chr9:34311369	1.0_x000D_ 0.0	0.9863_x000D_ 0.0137	-0.0137_x000D_ 0.0137	NA_x000D_ NA	1_x000D_ 2	1.0_x000D_ NA	1.0_x000D_ NA	1.0_x000D_ NA	NA_x000D_ Shortening	KIF24_exon_chr9:34254518	KIF24_exon_chr9:34311369
LL22NC01-81G9.3	0.2548	1.1472	1.7279	1	NC	No	No	1	LL22NC01-81G9.3_exon_chr22:37364026	1	1	0	NA	1	1	1	1	NA	LL22NC01-81G9.3_exon_chr22:37364026
TRIM45	2.1837	7.2707	1.7185	0.3535	NC	No	No	1	TRIM45_exon_chr1:117655075	1	1	0	NA	2	NA	NA	NA	NA	TRIM45_exon_chr1:117655075
BORCS5	7.1329	23.2447	1.7181	0.0503	UP	No	No	1	BORCS5_exon_chr12:12618479	1	1	0	NA	1	1	1	1	NA	BORCS5_exon_chr12:12618479
GOLT1B	39.8892	133.608	1.7181	0	UP	No	Yes	1	GOLT1B_exon_chr12:21668602	1	1	0	NA	5	0.3002	0.0178	-0.2824	Shortening	GOLT1B_exon_chr12:21668602
CPM	2.778	9.3688	1.7156	0.3037	NC	No	No	1	CPM_exon_chr12:69250459	1	1	0	NA	4	NA	NA	NA	NA	CPM_exon_chr12:69250459
VAMP4	9.8744	32.3531	1.7141	0.0135	UP	No	Yes	2	VAMP4_exon_chr1:171673674_x000D_ VAMP4_exon_chr1:171679954	0.8565_x000D_ 0.1435	0.9358_x000D_ 0.0642	0.0793_x000D_ -0.0793	NA_x000D_ NA	4_x000D_ 1	NA_x000D_ 1.0	NA_x000D_ 1.0	NA_x000D_ 1.0	Shortening_x000D_ NA	VAMP4_exon_chr1:171673674	VAMP4_exon_chr1:171679954
LRP4	2.0257	6.4934	1.7126	0.2789	NC	No	No	1	LRP4_exon_chr11:46880866	1	1	0	NA	2	NA	NA	NA	NA	LRP4_exon_chr11:46880866
OBSCN	1.5524	4.7133	1.7104	1	NC	No	No	2	OBSCN_exon_chr1:228547297_x000D_ OBSCN_exon_chr1:228566318	0.25_x000D_ 0.75	0.8702_x000D_ 0.1298	0.6202_x000D_ -0.6202	NA_x000D_ NA	1_x000D_ 1	1.0_x000D_ 1.0	1.0_x000D_ 1.0	1.0_x000D_ 1.0	NA_x000D_ NA	OBSCN_exon_chr1:228547297	OBSCN_exon_chr1:228566318
RPS6KA3	44.5458	147.412	1.7102	0	UP	No	Yes	1	RPS6KA3_exon_chrX:20173638	1	1	0	NA	5	0.442	0.0558	-0.3862	Shortening	RPS6KA3_exon_chrX:20173638
GPR107	112.46	367.572	1.7081	0	UP	No	Yes	1	GPR107_exon_chr9:132897303	1	1	0	NA	5	0.7184	0.1556	-0.5627	Shortening	GPR107_exon_chr9:132897303
ADM2	5.2639	16.5872	1.7054	0.1562	NC	No	No	1	ADM2_exon_chr22:50920995	1	1	0	NA	2	NA	NA	NA	NA	ADM2_exon_chr22:50920995
RGS2-AS1	9.753	32.0648	1.7011	0.0171	UP	No	No	1	RGS2-AS1_exon_chr1:192905033	1	1	0	NA	1	1	1	1	NA	RGS2-AS1_exon_chr1:192905033
GCNA	1.2742	4.4762	1.699	1	NC	No	No	1	GCNA_exon_chrX:70832711	1	1	0	NA	1	1	1	1	NA	GCNA_exon_chrX:70832711
RAB3GAP2	18.8766	62.5783	1.6979	0.0007	UP	No	Yes	1	RAB3GAP2_exon_chr1:220324748	1	1	0	NA	3	0.3509	0.1021	-0.2487	Both	RAB3GAP2_exon_chr1:220324748
LOC101927354	0.6429	2.0719	1.6958	1	NC	No	No	1	LOC101927354_exon_chr7:7317215	1	1	0	NA	1	1	1	1	NA	LOC101927354_exon_chr7:7317215
ATP10D	2.0498	6.4182	1.6863	0.3206	NC	No	No	1	ATP10D_exon_chr4:47593058	1	1	0	NA	1	1	1	1	NA	ATP10D_exon_chr4:47593058
FN3K	0	0.5693	1.6856	1	NC	No	No	1	FN3K_exon_chr17:80708292	1	1	0	NA	1	1	1	1	NA	FN3K_exon_chr17:80708292
VGLL4	32.8391	106.063	1.6852	0.0001	UP	No	Yes	1	VGLL4_exon_chr3:11600301	1	1	0	NA	5	NA	NA	NA	Both	VGLL4_exon_chr3:11600301
FAM214A	2.4138	7.5309	1.6838	0.3098	NC	No	No	1	FAM214A_exon_chr15:52874504	1	1	0	NA	2	NA	NA	NA	NA	FAM214A_exon_chr15:52874504
MESP2	1.7592	5.8516	1.6811	0.8134	NC	No	No	1	MESP2_exon_chr15:90321295	1	1	0	NA	1	1	1	1	NA	MESP2_exon_chr15:90321295
ESR2	1.0551	3.3088	1.6799	1	NC	No	No	1	ESR2_exon_chr14:64803438	1	1	0	NA	1	1	1	1	NA	ESR2_exon_chr14:64803438
CTAGE10P	1.3464	4.1872	1.6787	0.8948	NC	No	No	1	CTAGE10P_exon_chr13:50464544	1	1	0	NA	1	1	1	1	NA	CTAGE10P_exon_chr13:50464544
GCHFR	2.4269	7.9587	1.6771	0.8602	NC	No	No	1	GCHFR_exon_chr15:41059423	1	1	0	NA	1	1	1	1	NA	GCHFR_exon_chr15:41059423
PUS3	4.9739	16.1914	1.6768	0.1151	NC	No	No	1	PUS3_exon_chr11:125764181	1	1	0	NA	1	1	1	1	NA	PUS3_exon_chr11:125764181
SLC29A3	3.0815	10.1345	1.6762	0.1562	NC	No	No	1	SLC29A3_exon_chr10:73121710	1	1	0	NA	1	1	1	1	NA	SLC29A3_exon_chr10:73121710
LOC101927151	9.2313	29.1435	1.6724	0.0229	UP	No	No	1	LOC101927151_exon_chr19:28296512	1	1	0	NA	1	1	1	1	NA	LOC101927151_exon_chr19:28296512
SKIL	26.2617	83.5667	1.6715	0.0004	UP	No	Yes	1	SKIL_exon_chr3:170110046	1	1	0	NA	3	0.3396	0.0951	-0.2444	Shortening	SKIL_exon_chr3:170110046
ZNF395	26.2641	84.688	1.6693	0	UP	No	Yes	1	ZNF395_exon_chr8:28206347	1	1	0	NA	5	0.9976	0.448	-0.5496	Both	ZNF395_exon_chr8:28206347
ZDHHC11B	0.7762	2.2452	1.6691	1	NC	No	No	1	ZDHHC11B_exon_chr5:712397	1	1	0	NA	1	1	1	1	NA	ZDHHC11B_exon_chr5:712397
PANK2	85.7987	272.367	1.6686	0	UP	Yes	Yes	2	PANK2_exon_chr20:3888572_x000D_ PANK2_exon_chr20:3903890	0.1825_x000D_ 0.8175	0.311_x000D_ 0.689	0.1285_x000D_ -0.1285	Up_x000D_ Down	7_x000D_ 1	0.2232_x000D_ 1.0	0.0447_x000D_ 1.0	-0.1785_x000D_ 1.0	Shortening_x000D_ NA	PANK2_exon_chr20:3888572	PANK2_exon_chr20:3903890
DDX11L2	2.8383	8.5971	1.6652	0.3288	NC	No	No	1	DDX11L2_exon_chr2:114358421	1	1	0	NA	1	1	1	1	NA	DDX11L2_exon_chr2:114358421
JRK	7.4488	23.733	1.6626	0.0702	UP	No	Yes	1	JRK_exon_chr8:143746087	1	1	0	NA	3	NA	NA	NA	Both	JRK_exon_chr8:143746087
HIPK3	38.4662	122.174	1.6573	0	UP	No	Yes	1	HIPK3_exon_chr11:33374637	1	1	0	NA	6	0.87	0.1235	-0.7466	Shortening	HIPK3_exon_chr11:33374637
LINC01910	7.556	22.9336	1.653	0.1093	NC	No	Yes	1	LINC01910_exon_chr18:68049665	1	1	0	NA	2	NA	NA	NA	Lengthening	LINC01910_exon_chr18:68049665
RASSF8-AS1	1.1526	3.8493	1.6522	1	NC	No	No	1	RASSF8-AS1_exon_chr12:26108174	1	1	0	NA	1	1	1	1	NA	RASSF8-AS1_exon_chr12:26108174
RASA4	3.6022	10.7905	1.6521	0.2593	NC	No	No	1	RASA4_exon_chr7:102223339	1	1	0	NA	1	1	1	1	NA	RASA4_exon_chr7:102223339
ZNF780A	41.1094	128.826	1.6502	0	UP	No	No	2	ZNF780A_exon_chr19:40578556_x000D_ ZNF780A_exon_chr19:40582116	0.1457_x000D_ 0.8543	0.0203_x000D_ 0.9797	-0.1254_x000D_ 0.1254	NA_x000D_ Up	1_x000D_ 2	1.0_x000D_ NA	1.0_x000D_ NA	1.0_x000D_ NA	NA_x000D_ NA	ZNF780A_exon_chr19:40578556	ZNF780A_exon_chr19:40582116
ATF3	13.9733	43.2077	1.6467	0.0038	UP	No	Yes	1	ATF3_exon_chr1:212792387	1	1	0	NA	2	NA	NA	NA	Shortening	ATF3_exon_chr1:212792387
IQGAP2	3.4084	10.5133	1.6461	0.3295	NC	No	No	1	IQGAP2_exon_chr5:75960850	1	1	0	NA	1	1	1	1	NA	IQGAP2_exon_chr5:75960850
OSCAR	0.2548	1.0749	1.6418	1	NC	No	No	1	OSCAR_exon_chr19:54599418	1	1	0	NA	1	1	1	1	NA	OSCAR_exon_chr19:54599418
PNPLA8	17.5293	54.9029	1.6415	0.0009	UP	No	Yes	1	PNPLA8_exon_chr7:108113119	1	1	0	NA	6	NA	NA	NA	Both	PNPLA8_exon_chr7:108113119
LGALS8	22.9409	72.671	1.6375	0.0001	UP	No	Yes	1	LGALS8_exon_chr1:236711311	1	1	0	NA	4	0.4642	0.0991	-0.3651	Shortening	LGALS8_exon_chr1:236711311
LINC00672	2.984	9.1722	1.6365	0.2893	NC	No	No	1	LINC00672_exon_chr17:37082669	1	1	0	NA	1	1	1	1	NA	LINC00672_exon_chr17:37082669
WSB1	4.5	13.4633	1.6363	0.1604	NC	No	Yes	1	WSB1_exon_chr17:25639235	1	1	0	NA	4	NA	NA	NA	Both	WSB1_exon_chr17:25639235
GPR63	11.4502	35.1517	1.6354	0.0337	UP	No	Yes	1	GPR63_exon_chr6:97247757	1	1	0	NA	6	NA	NA	NA	Both	GPR63_exon_chr6:97247757
CYBRD1	18.6442	57.2279	1.6354	0.0001	UP	No	Yes	1	CYBRD1_exon_chr2:172411033	1	1	0	NA	6	0.5638	0.2389	-0.3249	Both	CYBRD1_exon_chr2:172411033
IKZF4	0.7645	2.7713	1.634	1	NC	No	No	1	IKZF4_exon_chr12:56428354	1	1	0	NA	1	1	1	1	NA	IKZF4_exon_chr12:56428354
GJB4	2.9476	9.1869	1.6338	0.2758	NC	No	No	1	GJB4_exon_chr1:35226533	1	1	0	NA	1	1	1	1	NA	GJB4_exon_chr1:35226533
FAM124A	1.9288	5.9528	1.6321	0.5239	NC	No	No	2	FAM124A_exon_chr13:51825603_x000D_ FAM124A_exon_chr13:51854585	0.7352_x000D_ 0.2648	0.1365_x000D_ 0.8635	-0.5987_x000D_ 0.5987	NA_x000D_ NA	1_x000D_ 1	1.0_x000D_ 1.0	1.0_x000D_ 1.0	1.0_x000D_ 1.0	NA_x000D_ NA	FAM124A_exon_chr13:51825603	FAM124A_exon_chr13:51854585
PCAT6	0.7762	2.1442	1.6309	1	NC	No	No	1	PCAT6_exon_chr1:202780702	1	1	0	NA	1	1	1	1	NA	PCAT6_exon_chr1:202780702
NBPF3	5.7865	17.8035	1.6307	0.067	UP	No	No	1	NBPF3_exon_chr1:21809635	1	1	0	NA	1	1	1	1	NA	NBPF3_exon_chr1:21809635
PRKY	0.2548	1.0749	1.626	1	NC	No	No	1	PRKY_exon_chrY:7243752	1	1	0	NA	1	1	1	1	NA	PRKY_exon_chrY:7243752
KRBOX4	10.1409	31.0853	1.6251	0.0098	UP	No	Yes	1	KRBOX4_exon_chrX:46332184	1	1	0	NA	5	NA	NA	NA	Shortening	KRBOX4_exon_chrX:46332184
RBAK	33.5511	102.625	1.6244	0	UP	No	Yes	1	RBAK_exon_chr7:5103325	1	1	0	NA	4	0.9373	0.1999	-0.7374	Shortening	RBAK_exon_chr7:5103325
GZMM	0	0.5374	1.6236	1	NC	No	No	1	GZMM_exon_chr19:549629	1	1	0	NA	1	1	1	1	NA	GZMM_exon_chr19:549629
CDKN2B	5.7372	17.3705	1.6202	0.1574	NC	No	Yes	1	CDKN2B_exon_chr9:22006246	1	1	0	NA	3	NA	NA	NA	Shortening	CDKN2B_exon_chr9:22006246
DENND2A	4.3551	13.611	1.6196	0.2396	NC	No	No	1	DENND2A_exon_chr7:140218538	1	1	0	NA	1	1	1	1	NA	DENND2A_exon_chr7:140218538
ARHGAP27P2	0.5097	1.8206	1.6181	1	NC	No	No	1	ARHGAP27P2_exon_chr17:66194800	1	1	0	NA	1	1	1	1	NA	ARHGAP27P2_exon_chr17:66194800
SORT1	45.1236	137.326	1.6152	0	UP	No	Yes	1	SORT1_exon_chr1:109856679	1	1	0	NA	5	0.6388	0.164	-0.4748	Both	SORT1_exon_chr1:109856679
HIPK4	0.5097	1.6646	1.6123	1	NC	No	No	1	HIPK4_exon_chr19:40885676	1	1	0	NA	1	1	1	1	NA	HIPK4_exon_chr19:40885676
P2RY6	0	0.5374	1.6089	1	NC	No	No	1	P2RY6_exon_chr11:73007529	1	1	0	NA	1	1	1	1	NA	P2RY6_exon_chr11:73007529
HLA-F	0.7398	2.1211	1.6079	1	NC	No	No	1	HLA-F_exon_chr6:29694659	1	1	0	NA	1	1	1	1	NA	HLA-F_exon_chr6:29694659
LOC100288798	6.8911	21.7223	1.6078	0.0388	UP	No	No	1	LOC100288798_exon_chr12:47046172	1	1	0	NA	1	1	1	1	NA	LOC100288798_exon_chr12:47046172
OIP5-AS1	107.967	331.652	1.6072	0	UP	No	Yes	1	OIP5-AS1_exon_chr15:41590238	1	1	0	NA	8	0.5272	0.1276	-0.3996	Both	OIP5-AS1_exon_chr15:41590238
GTF2IRD2	2.7902	8.6345	1.6057	0.2202	NC	No	No	1	GTF2IRD2_exon_chr7:74248066	1	1	0	NA	1	1	1	1	NA	GTF2IRD2_exon_chr7:74248066
TCP11L1	8.8908	26.1406	1.6053	0.0109	UP	No	Yes	1	TCP11L1_exon_chr11:33094019	1	1	0	NA	3	NA	NA	NA	Shortening	TCP11L1_exon_chr11:33094019
LOC102724378	1.1279	3.1123	1.5993	0.4852	NC	No	No	1	LOC102724378_exon_chr22:38140844	1	1	0	NA	1	1	1	1	NA	LOC102724378_exon_chr22:38140844
INSIG1	85.2833	260.126	1.5981	0	UP	No	Yes	1	INSIG1_exon_chr7:155099950	1	1	0	NA	4	0.7851	0.1127	-0.6723	Shortening	INSIG1_exon_chr7:155099950
LOC105370943	0	0.5374	1.597	1	NC	No	No	1	LOC105370943_exon_chr15:41201026	1	1	0	NA	1	1	1	1	NA	LOC105370943_exon_chr15:41201026
EGR3	0	0.5374	1.597	1	NC	No	No	1	EGR3_exon_chr8:22548995	1	1	0	NA	1	1	1	1	NA	EGR3_exon_chr8:22548995
TM9SF1	7.2064	22.5373	1.596	0.0422	UP	No	No	1	TM9SF1_exon_chr14:24662475	1	1	0	NA	2	NA	NA	NA	NA	TM9SF1_exon_chr14:24662475
LOC100129534	1.4191	4.0658	1.5948	1	NC	No	No	1	LOC100129534_exon_chr1:2284100	1	1	0	NA	1	1	1	1	NA	LOC100129534_exon_chr1:2284100
BMP2K	3.64	11.796	1.5943	0.1847	NC	Yes	No	2	BMP2K_exon_chr4:79799887_x000D_ BMP2K_exon_chr4:79831763	1.0_x000D_ 0.0	0.3933_x000D_ 0.6067	-0.6067_x000D_ 0.6067	NA_x000D_ Up	1_x000D_ 1	1.0_x000D_ 1.0	1.0_x000D_ 1.0	1.0_x000D_ 1.0	NA_x000D_ NA	BMP2K_exon_chr4:79799887	BMP2K_exon_chr4:79831763
PPM1D	43.2431	128.925	1.5939	0	UP	No	Yes	1	PPM1D_exon_chr17:58740355	1	1	0	NA	4	0.4697	0.0997	-0.37	Shortening	PPM1D_exon_chr17:58740355
ZNF449	4.3557	13.7091	1.593	0.2128	NC	No	No	1	ZNF449_exon_chrX:134494117	1	1	0	NA	3	NA	NA	NA	NA	ZNF449_exon_chrX:134494117
LINC01547	0.5097	1.8206	1.5893	1	NC	No	No	2	LINC01547_exon_chr21:46354283_x000D_ LINC01547_exon_chr21:46355011	0.0_x000D_ 1.0	0.3259_x000D_ 0.6741	0.3259_x000D_ -0.3259	NA_x000D_ NA	1_x000D_ 1	1.0_x000D_ 1.0	1.0_x000D_ 1.0	1.0_x000D_ 1.0	NA_x000D_ NA	LINC01547_exon_chr21:46354283	LINC01547_exon_chr21:46355011
UFM1	53.6777	161.142	1.5853	0	UP	No	Yes	1	UFM1_exon_chr13:38934177	1	1	0	NA	7	0.5089	0.0566	-0.4523	Shortening	UFM1_exon_chr13:38934177
KLF7	4.1119	11.9927	1.585	0.1925	NC	No	Yes	1	KLF7_exon_chr2:207945988	1	1	0	NA	2	NA	NA	NA	Shortening	KLF7_exon_chr2:207945988
ABCB1	6.3924	18.7835	1.5842	0.1004	NC	No	No	2	ABCB1_exon_chr7:87133765_x000D_ ABCB1_exon_chr7:87229506	0.2011_x000D_ 0.7989	0.4973_x000D_ 0.5027	0.2962_x000D_ -0.2962	NA_x000D_ NA	2_x000D_ 1	NA_x000D_ 1.0	NA_x000D_ 1.0	NA_x000D_ 1.0	NA_x000D_ NA	ABCB1_exon_chr7:87133765	ABCB1_exon_chr7:87229506
TCTA	15.3092	45.8889	1.584	0.0024	UP	No	No	1	TCTA_exon_chr3:49452252	1	1	0	NA	1	1	1	1	NA	TCTA_exon_chr3:49452252
LINC02323	4.5006	13.4722	1.5813	0.2474	NC	No	No	1	LINC02323_exon_chr14:103021046	1	1	0	NA	1	1	1	1	NA	LINC02323_exon_chr14:103021046
IL32	2.2442	6.7216	1.5791	1	NC	No	No	1	IL32_exon_chr16:3118990	1	1	0	NA	1	1	1	1	NA	IL32_exon_chr16:3118990
LOC101927668	3.1667	9.9463	1.5781	0.2122	NC	No	No	1	LOC101927668_exon_chr7:20180781	1	1	0	NA	4	NA	NA	NA	NA	LOC101927668_exon_chr7:20180781
SETD6	15.7694	46.2841	1.5767	0.002	UP	No	Yes	1	SETD6_exon_chr16:58552627	1	1	0	NA	2	NA	NA	NA	Shortening	SETD6_exon_chr16:58552627
ERICH2	6.4893	19.0413	1.5755	0.1028	NC	Yes	No	2	ERICH2_exon_chr2:171634153_x000D_ ERICH2_exon_chr2:171655279	0.3908_x000D_ 0.6092	0.0444_x000D_ 0.9556	-0.3465_x000D_ 0.3465	NA_x000D_ Up	1_x000D_ 1	1.0_x000D_ 1.0	1.0_x000D_ 1.0	1.0_x000D_ 1.0	NA_x000D_ NA	ERICH2_exon_chr2:171634153	ERICH2_exon_chr2:171655279
JAZF1	13.2452	38.5783	1.5733	0.008	UP	No	Yes	1	JAZF1_exon_chr7:27872595	1	1	0	NA	3	NA	NA	NA	Shortening	JAZF1_exon_chr7:27872595
TBX19	1.1526	3.6006	1.573	1	NC	No	No	1	TBX19_exon_chr1:168281945	1	1	0	NA	1	1	1	1	NA	TBX19_exon_chr1:168281945
NATD1	1.3827	3.9298	1.5707	1	NC	No	No	1	NATD1_exon_chr17:21146742	1	1	0	NA	1	1	1	1	NA	NATD1_exon_chr17:21146742
ZNF585B	1.6623	5.3171	1.5699	0.9386	NC	No	No	1	ZNF585B_exon_chr19:37678146	1	1	0	NA	2	NA	NA	NA	NA	ZNF585B_exon_chr19:37678146
TEX19	4.1119	11.7695	1.5696	0.2905	NC	No	No	1	TEX19_exon_chr17:80319755	1	1	0	NA	1	1	1	1	NA	TEX19_exon_chr17:80319755
EPB41L4B	12.0951	36.4542	1.5692	0.0051	UP	No	Yes	1	EPB41L4B_exon_chr9:112004089	1	1	0	NA	4	NA	NA	NA	Both	EPB41L4B_exon_chr9:112004089
LRP2BP	1.7956	5.5021	1.5688	1	NC	No	No	2	LRP2BP_exon_chr4:186288399_x000D_ LRP2BP_exon_chr4:186294233	1.0_x000D_ 0.0	0.5456_x000D_ 0.4544	-0.4544_x000D_ 0.4544	NA_x000D_ NA	1_x000D_ 3	1.0_x000D_ NA	1.0_x000D_ NA	1.0_x000D_ NA	NA_x000D_ NA	LRP2BP_exon_chr4:186288399	LRP2BP_exon_chr4:186294233
MMP7	0.8978	2.7048	1.568	1	NC	No	No	1	MMP7_exon_chr11:102394132	1	1	0	NA	1	1	1	1	NA	MMP7_exon_chr11:102394132
PDE3B	11.6597	34.8964	1.5647	0.311	NC	No	Yes	2	PDE3B_exon_chr11:14889051_x000D_ PDE3B_exon_chr11:14891006	0.6483_x000D_ 0.3517	0.5801_x000D_ 0.4199	-0.0682_x000D_ 0.0682	NA_x000D_ NA	4_x000D_ 1	NA_x000D_ 1.0	NA_x000D_ 1.0	NA_x000D_ 1.0	Both_x000D_ NA	PDE3B_exon_chr11:14889051	PDE3B_exon_chr11:14891006
ZNF695	1.1526	3.6093	1.5625	1	NC	No	No	1	ZNF695_exon_chr1:247151557	1	1	0	NA	2	NA	NA	NA	NA	ZNF695_exon_chr1:247151557
EML6	6.8175	20.0321	1.5582	0.1709	NC	No	No	2	EML6_exon_chr2:55176018_x000D_ EML6_exon_chr2:55197206	0.7184_x000D_ 0.2816	0.6289_x000D_ 0.3711	-0.0895_x000D_ 0.0895	NA_x000D_ NA	1_x000D_ 1	1.0_x000D_ 1.0	1.0_x000D_ 1.0	1.0_x000D_ 1.0	NA_x000D_ NA	EML6_exon_chr2:55176018	EML6_exon_chr2:55197206
CILK1	69.1891	202.146	1.5566	0	UP	Yes	Yes	2	CILK1_exon_chr6:52870101_x000D_ CILK1_exon_chr6:52906206	0.3989_x000D_ 0.6011	0.6004_x000D_ 0.3996	0.2016_x000D_ -0.2016	Up_x000D_ NA	1_x000D_ 3	1.0_x000D_ 0.8998	1.0_x000D_ 0.0372	1.0_x000D_ -0.8626	NA_x000D_ Shortening	CILK1_exon_chr6:52870101	CILK1_exon_chr6:52906206
KCTD1	15.6981	46.8825	1.5564	0.0008	UP	No	Yes	1	KCTD1_exon_chr18:24035865	1	1	0	NA	4	0.3596	0.1667	-0.1929	Both	KCTD1_exon_chr18:24035865
IFI35	22.0535	65.124	1.5562	0.0002	UP	No	No	1	IFI35_exon_chr17:41166124	1	1	0	NA	1	1	1	1	NA	IFI35_exon_chr17:41166124
IFIT1	14.5302	41.8214	1.5558	0.056	UP	No	Yes	1	IFIT1_exon_chr10:91162037	1	1	0	NA	2	NA	NA	NA	Shortening	IFIT1_exon_chr10:91162037
KIAA0513	14.3018	42.4222	1.5557	0.0123	UP	Yes	No	2	KIAA0513_exon_chr16:85112530_x000D_ KIAA0513_exon_chr16:85121881	0.353_x000D_ 0.647	0.7239_x000D_ 0.2761	0.3709_x000D_ -0.3709	Up_x000D_ NA	1_x000D_ 2	1.0_x000D_ NA	1.0_x000D_ NA	1.0_x000D_ NA	NA_x000D_ NA	KIAA0513_exon_chr16:85112530	KIAA0513_exon_chr16:85121881
RCBTB2	0.6429	1.9333	1.5548	1	NC	No	No	1	RCBTB2_exon_chr13:49064387	1	1	0	NA	1	1	1	1	NA	RCBTB2_exon_chr13:49064387
MCF2L-AS1	0.7645	2.4503	1.5538	1	NC	No	No	1	MCF2L-AS1_exon_chr13:113622952	1	1	0	NA	1	1	1	1	NA	MCF2L-AS1_exon_chr13:113622952
MIR10399	18.3281	52.7906	1.5523	0.0047	UP	No	Yes	1	MIR10399_exon_chr7:138732599	1	1	0	NA	6	0.9804	0.7716	NA	Both	MIR10399_exon_chr7:138732599
BIRC3	4.2212	12.4407	1.5503	0.1503	NC	No	Yes	1	BIRC3_exon_chr11:102207639	1	1	0	NA	2	NA	NA	NA	Shortening	BIRC3_exon_chr11:102207639
CD22	2.4743	6.9007	1.5497	0.4194	NC	No	No	1	CD22_exon_chr19:35837468	1	1	0	NA	1	1	1	1	NA	CD22_exon_chr19:35837468
PDK4	3.3721	9.7243	1.5492	0.2573	NC	No	No	1	PDK4_exon_chr7:95215093	1	1	0	NA	1	1	1	1	NA	PDK4_exon_chr7:95215093
EIF5A2	41.0455	117.988	1.5489	0	UP	No	Yes	1	EIF5A2_exon_chr3:170611208	1	1	0	NA	8	0.3335	0.0829	-0.2506	Shortening	EIF5A2_exon_chr3:170611208
ETV1	25.2667	73.0338	1.545	0.0005	UP	No	Yes	1	ETV1_exon_chr7:13935712	1	1	0	NA	6	0.7282	0.0652	-0.663	Shortening	ETV1_exon_chr7:13935712
PTPN4	24.3216	70.5999	1.5423	0.0001	UP	No	Yes	1	PTPN4_exon_chr2:120734559	1	1	0	NA	3	0.2164	0.1246	-0.0918	Shortening	PTPN4_exon_chr2:120734559
KLK1	1.9405	5.3144	1.5415	1	NC	No	No	1	KLK1_exon_chr19:51322605	1	1	0	NA	1	1	1	1	NA	KLK1_exon_chr19:51322605
LOC646214	13.502	39.7372	1.5386	0.0021	UP	No	Yes	1	LOC646214_exon_chr15:21940739	1	1	0	NA	4	NA	NA	NA	Both	LOC646214_exon_chr15:21940739
ATL3	96.9171	283.894	1.5385	0	UP	No	Yes	1	ATL3_exon_chr11:63396877	1	1	0	NA	3	0.4879	0.068	-0.4198	Shortening	ATL3_exon_chr11:63396877
PNMA2	1.1643	3.1673	1.5377	1	NC	No	No	1	PNMA2_exon_chr8:26366759	1	1	0	NA	2	NA	NA	NA	NA	PNMA2_exon_chr8:26366759
TYMSOS	4.0755	11.6432	1.5371	0.1846	NC	No	No	1	TYMSOS_exon_chr18:649964	1	1	0	NA	2	NA	NA	NA	NA	TYMSOS_exon_chr18:649964
MSANTD2	5.63	17.3531	1.5321	0.1358	NC	No	No	1	MSANTD2_exon_chr11:124637924	1	1	0	NA	2	NA	NA	NA	NA	MSANTD2_exon_chr11:124637924
DNHD1	0.3881	1.0231	1.5315	1	NC	No	No	1	DNHD1_exon_chr11:6592865	1	1	0	NA	1	1	1	1	NA	DNHD1_exon_chr11:6592865
IGF2BP1	0.3881	1.0231	1.5314	1	NC	No	No	1	IGF2BP1_exon_chr17:47126713	1	1	0	NA	1	1	1	1	NA	IGF2BP1_exon_chr17:47126713
C11orf71	1.9041	4.8633	1.53	0.4701	NC	No	No	1	C11orf71_exon_chr11:114271233	1	1	0	NA	2	NA	NA	NA	NA	C11orf71_exon_chr11:114271233
C22orf39	81.0894	233.289	1.5289	0	UP	Yes	Yes	2	C22orf39_exon_chr22:19429217_x000D_ C22orf39_exon_chr22:19431913	0.8629_x000D_ 0.1371	0.9674_x000D_ 0.0326	0.1045_x000D_ -0.1045	Up_x000D_ NA	3_x000D_ 2	NA_x000D_ 0.4649	NA_x000D_ 0.1281	NA_x000D_ -0.3368	NA_x000D_ Shortening	C22orf39_exon_chr22:19429217	C22orf39_exon_chr22:19431913
MALINC1	1.31	3.7944	1.5269	1	NC	No	No	1	MALINC1_exon_chr5:139483751	1	1	0	NA	1	1	1	1	NA	MALINC1_exon_chr5:139483751
MIR570	0.8978	2.6412	1.5257	1	NC	No	No	1	MIR570_exon_chr3:195426271	1	1	0	NA	1	1	1	1	NA	MIR570_exon_chr3:195426271
SUN3	12.8584	37.201	1.523	0.0316	UP	No	No	1	SUN3_exon_chr7:48027046	1	1	0	NA	1	1	1	1	NA	SUN3_exon_chr7:48027046
ZSWIM6	20.4275	58.2232	1.5129	0.0011	UP	No	Yes	1	ZSWIM6_exon_chr5:60839281	1	1	0	NA	3	0.9291	0.2053	-0.7238	Shortening	ZSWIM6_exon_chr5:60839281
LOC220729	1.9172	5.8345	1.511	1	NC	No	No	1	LOC220729_exon_chr3:197341493	1	1	0	NA	1	1	1	1	NA	LOC220729_exon_chr3:197341493
ABLIM2	2.4502	6.8462	1.5107	0.6128	NC	No	No	2	ABLIM2_exon_chr4:7968830_x000D_ ABLIM2_exon_chr4:8009927	0.4209_x000D_ 0.5791	0.174_x000D_ 0.826	-0.2469_x000D_ 0.2469	NA_x000D_ NA	2_x000D_ 1	NA_x000D_ 1.0	NA_x000D_ 1.0	NA_x000D_ 1.0	NA_x000D_ NA	ABLIM2_exon_chr4:7968830	ABLIM2_exon_chr4:8009927
FRS2	6.0045	17.1707	1.5061	0.1019	NC	No	Yes	1	FRS2_exon_chr12:69967784	1	1	0	NA	5	NA	NA	NA	Shortening	FRS2_exon_chr12:69967784
ARHGEF28	0.7034	1.9652	1.5054	1	NC	No	No	1	ARHGEF28_exon_chr5:73236668	1	1	0	NA	1	1	1	1	NA	ARHGEF28_exon_chr5:73236668
FMNL3	3.7733	11.2962	1.5046	0.2188	NC	No	No	1	FMNL3_exon_chr12:50039686	1	1	0	NA	3	NA	NA	NA	NA	FMNL3_exon_chr12:50039686
STXBP2	1.2495	3.5688	1.5015	1	NC	No	No	1	STXBP2_exon_chr19:7712610	1	1	0	NA	1	1	1	1	NA	STXBP2_exon_chr19:7712610
AASS	9.6189	26.9531	1.4999	0.0458	UP	No	Yes	1	AASS_exon_chr7:121716661	1	1	0	NA	2	NA	NA	NA	Shortening	AASS_exon_chr7:121716661
OXCT2	5.156	14.7399	1.4996	0.2138	NC	No	No	1	OXCT2_exon_chr1:40237020	1	1	0	NA	1	1	1	1	NA	OXCT2_exon_chr1:40237020
AGO4	9.1841	27.0198	1.4989	0.0496	UP	No	Yes	1	AGO4_exon_chr1:36319097	1	1	0	NA	5	NA	NA	NA	Both	AGO4_exon_chr1:36319097
PNKP	18.5831	51.874	1.4977	0.0044	UP	No	No	1	PNKP_exon_chr19:50364622	1	1	0	NA	1	1	1	1	NA	PNKP_exon_chr19:50364622
CCN3	1.6617	4.6815	1.4976	1	NC	No	No	1	CCN3_exon_chr8:120435075	1	1	0	NA	2	NA	NA	NA	NA	CCN3_exon_chr8:120435075
SLC30A1	16.1101	45.6025	1.4971	0.0013	UP	No	Yes	1	SLC30A1_exon_chr1:211749631	1	1	0	NA	5	NA	NA	NA	Both	SLC30A1_exon_chr1:211749631
UBR7	86.8987	243.901	1.4966	0	UP	No	Yes	1	UBR7_exon_chr14:93693288	1	1	0	NA	3	0.8626	0.1102	-0.7524	Both	UBR7_exon_chr14:93693288
OGT	88.1664	249.363	1.4957	0	UP	No	Yes	1	OGT_exon_chrX:70793469	1	1	0	NA	7	0.6346	0.15	-0.4846	Shortening	OGT_exon_chrX:70793469
PSMB9	2.4743	6.6088	1.4956	0.3431	NC	No	No	1	PSMB9_exon_chr6:32827181	1	1	0	NA	1	1	1	1	NA	PSMB9_exon_chr6:32827181
HMGA2	188.173	533.71	1.4948	0	UP	Yes	Yes	4	HMGA2_exon_chr12:66236370_x000D_ HMGA2_exon_chr12:66308499_x000D_ HMGA2_exon_chr12:66346135_x000D_ HMGA2_exon_chr12:66357024	0.0216_x000D_ 0.0766_x000D_ 0.0385_x000D_ 0.8633	0.0777_x000D_ 0.1468_x000D_ 0.1817_x000D_ 0.5937	0.0561_x000D_ 0.0702_x000D_ 0.1433_x000D_ -0.2696	NA_x000D_ NA_x000D_ Up_x000D_ Down	1_x000D_ 2_x000D_ 1_x000D_ 8	1.0_x000D_ NA_x000D_ 1.0_x000D_ 0.7504	1.0_x000D_ NA_x000D_ 1.0_x000D_ 0.3866	1.0_x000D_ NA_x000D_ 1.0_x000D_ -0.3638	NA_x000D_ Shortening_x000D_ NA_x000D_ Shortening	HMGA2_exon_chr12:66236370	HMGA2_exon_chr12:66308499	HMGA2_exon_chr12:66346135	HMGA2_exon_chr12:66357024
RDH16	1.9405	5.2334	1.4922	1	NC	No	No	1	RDH16_exon_chr12:57346030	1	1	0	NA	1	1	1	1	NA	RDH16_exon_chr12:57346030
TMCC1-AS1	0.3881	1.0231	1.4909	1	NC	No	No	1	TMCC1-AS1_exon_chr3:129624469	1	1	0	NA	1	1	1	1	NA	TMCC1-AS1_exon_chr3:129624469
AKR1E2	1.031	2.8263	1.4901	1	NC	No	No	1	AKR1E2_exon_chr10:4889679	1	1	0	NA	1	1	1	1	NA	AKR1E2_exon_chr10:4889679
FRG1JP	54.1464	149.725	1.49	0	UP	Yes	Yes	2	FRG1JP_exon_chr9:68427894_x000D_ FRG1JP_exon_chr9:68430261	0.4174_x000D_ 0.5826	0.3026_x000D_ 0.6974	-0.1148_x000D_ 0.1148	NA_x000D_ Up	2_x000D_ 1	0.8213_x000D_ 1.0	0.936_x000D_ 1.0	0.1148_x000D_ 1.0	Lengthening_x000D_ NA	FRG1JP_exon_chr9:68427894	FRG1JP_exon_chr9:68430261
SCD5	71.8337	200.626	1.4899	0	UP	No	Yes	1	SCD5_exon_chr4:83552670	1	1	0	NA	4	0.7228	0.3169	-0.4059	Both	SCD5_exon_chr4:83552670
CHD6	27.9108	77.5447	1.4888	0.0001	UP	Yes	Yes	2	CHD6_exon_chr20:40034129_x000D_ CHD6_exon_chr20:40162209	0.713_x000D_ 0.287	0.9036_x000D_ 0.0964	0.1906_x000D_ -0.1906	Up_x000D_ NA	5_x000D_ 1	0.7119_x000D_ 1.0	0.1054_x000D_ 1.0	-0.6065_x000D_ 1.0	Both_x000D_ NA	CHD6_exon_chr20:40034129	CHD6_exon_chr20:40162209
C6orf89	159.116	447.027	1.4881	0	UP	No	Yes	1	C6orf89_exon_chr6:36891122	1	1	0	NA	4	0.6535	0.0446	-0.6089	Shortening	C6orf89_exon_chr6:36891122
ZNF91	4.524	12.2033	1.4879	0.2071	NC	No	Yes	1	ZNF91_exon_chr19:23545527	1	1	0	NA	2	NA	NA	NA	Lengthening	ZNF91_exon_chr19:23545527
ENTPD5	9.7543	28.5164	1.4866	0.0313	UP	No	No	2	ENTPD5_exon_chr14:74428253_x000D_ ENTPD5_exon_chr14:74433717	0.0261_x000D_ 0.9739	0.1254_x000D_ 0.8746	0.0992_x000D_ -0.0992	NA_x000D_ NA	6_x000D_ 1	NA_x000D_ 1.0	NA_x000D_ 1.0	NA_x000D_ 1.0	NA_x000D_ NA	ENTPD5_exon_chr14:74428253	ENTPD5_exon_chr14:74433717
RBM18	62.9083	175.947	1.4855	0	UP	No	Yes	1	RBM18_exon_chr9:125004322	1	1	0	NA	5	0.3357	0.0509	-0.2848	Shortening	RBM18_exon_chr9:125004322
SEC24A	27.9389	79	1.4824	0.003	UP	No	Yes	1	SEC24A_exon_chr5:134060669	1	1	0	NA	3	0.648	0.0967	-0.5513	Both	SEC24A_exon_chr5:134060669
EID2B	2.547	6.6751	1.4815	0.5237	NC	No	No	1	EID2B_exon_chr19:40023492	1	1	0	NA	1	1	1	1	NA	EID2B_exon_chr19:40023492
ZNF721	37.9181	105.564	1.4812	0.0001	UP	No	Yes	1	ZNF721_exon_chr4:438221	1	1	0	NA	3	0.4103	0.1175	-0.2928	Shortening	ZNF721_exon_chr4:438221
FLJ42627	1.3827	3.7626	1.4808	1	NC	No	No	1	FLJ42627_exon_chr16:2688982	1	1	0	NA	1	1	1	1	NA	FLJ42627_exon_chr16:2688982
TPBG	9.8264	28.0682	1.4801	0.0227	UP	No	Yes	1	TPBG_exon_chr6:83074339	1	1	0	NA	4	NA	NA	NA	Both	TPBG_exon_chr6:83074339
ACLY	498.307	1391.41	1.4795	0	UP	No	Yes	1	ACLY_exon_chr17:40024157	1	1	0	NA	3	0.9065	0.1581	-0.7484	Shortening	ACLY_exon_chr17:40024157
C6orf223	12.2889	34.4664	1.4777	0.058	UP	No	Yes	1	C6orf223_exon_chr6:43970417	1	1	0	NA	3	NA	NA	NA	Shortening	C6orf223_exon_chr6:43970417
SUPT7L	60.3608	167.864	1.475	0	UP	No	Yes	1	SUPT7L_exon_chr2:27876614	1	1	0	NA	5	0.616	0.3421	-0.2739	Shortening	SUPT7L_exon_chr2:27876614
PPP1R15A	22.4922	63.0629	1.4741	0.0123	UP	No	No	1	PPP1R15A_exon_chr19:49378870	1	1	0	NA	1	1	1	1	NA	PPP1R15A_exon_chr19:49378870
LOC100289561	5.4102	15.1571	1.4725	0.1967	NC	No	Yes	1	LOC100289561_exon_chr7:102020931	1	1	0	NA	2	NA	NA	NA	Lengthening	LOC100289561_exon_chr7:102020931
KTN1-AS1	4.5735	12.9834	1.4718	0.151	NC	No	Yes	1	KTN1-AS1_exon_chr14:56044097	1	1	0	NA	3	NA	NA	NA	Lengthening	KTN1-AS1_exon_chr14:56044097
OSBPL10	14.158	40.4332	1.4704	0.0027	UP	No	Yes	2	OSBPL10_exon_chr3:31703608_x000D_ OSBPL10_exon_chr3:31744000	0.7464_x000D_ 0.2536	0.7235_x000D_ 0.2765	-0.023_x000D_ 0.023	NA_x000D_ NA	1_x000D_ 2	1.0_x000D_ NA	1.0_x000D_ NA	1.0_x000D_ NA	NA_x000D_ Shortening	OSBPL10_exon_chr3:31703608	OSBPL10_exon_chr3:31744000
SCAI	12.7355	34.1827	1.4692	0.013	UP	No	Yes	1	SCAI_exon_chr9:127715232	1	1	0	NA	5	NA	NA	NA	Shortening	SCAI_exon_chr9:127715232
STK17B	13.7686	38.3756	1.4673	0.023	UP	No	Yes	1	STK17B_exon_chr2:197002453	1	1	0	NA	4	0.7071	0.2434	NA	Both	STK17B_exon_chr2:197002453
LAMC1	72.1764	199.503	1.4645	0	UP	No	Yes	2	LAMC1_exon_chr1:183103794_x000D_ LAMC1_exon_chr1:183111668	0.1378_x000D_ 0.8622	0.1561_x000D_ 0.8409	0.0183_x000D_ -0.0213	NA_x000D_ NA	1_x000D_ 5	1.0_x000D_ 0.5507	1.0_x000D_ 0.0785	1.0_x000D_ -0.4723	NA_x000D_ Shortening	LAMC1_exon_chr1:183103794	LAMC1_exon_chr1:183111668
LOH12CR2	0.5097	1.5518	1.463	1	NC	No	No	1	LOH12CR2_exon_chr12:12509739	1	1	0	NA	1	1	1	1	NA	LOH12CR2_exon_chr12:12509739
MBNL3	5.6274	15.1886	1.4611	0.4	NC	No	Yes	1	MBNL3_exon_chrX:131513705	1	1	0	NA	3	NA	NA	NA	Shortening	MBNL3_exon_chrX:131513705
LOC108783654	13.0628	35.3993	1.4599	0.3067	NC	No	No	1	LOC108783654_exon_chr17:40706820	1	1	0	NA	2	NA	NA	NA	NA	LOC108783654_exon_chr17:40706820
SUGT1P4-STRA6LP	0.3881	0.9826	1.4576	1	NC	No	No	1	SUGT1P4-STRA6LP_exon_chr9:100057901	1	1	0	NA	1	1	1	1	NA	SUGT1P4-STRA6LP_exon_chr9:100057901
TMEM9B	23.6431	65.4177	1.4573	0.0001	UP	No	Yes	1	TMEM9B_exon_chr11:8970022	1	1	0	NA	5	0.5897	0.1597	-0.4299	Shortening	TMEM9B_exon_chr11:8970022
RGS2	38.7415	105.55	1.4571	0.0023	UP	No	No	1	RGS2_exon_chr1:192780531	1	1	0	NA	2	0.8521	0.8005	-0.0516	NA	RGS2_exon_chr1:192780531
SHANK2	1.4191	3.7539	1.4559	1	NC	No	No	1	SHANK2_exon_chr11:70319544	1	1	0	NA	2	NA	NA	NA	NA	SHANK2_exon_chr11:70319544
PRPF40B	9.5947	25.5999	1.4544	0.1181	NC	No	No	1	PRPF40B_exon_chr12:50037882	1	1	0	NA	1	1	1	1	NA	PRPF40B_exon_chr12:50037882
PPP2R1B	81.8135	227.188	1.4524	0	UP	Yes	Yes	2	PPP2R1B_exon_chr11:111597781_x000D_ PPP2R1B_exon_chr11:111612336	0.1415_x000D_ 0.8585	0.6656_x000D_ 0.3344	0.5241_x000D_ -0.5241	Up_x000D_ NA	1_x000D_ 5	1.0_x000D_ 0.6942	1.0_x000D_ 0.2312	1.0_x000D_ -0.463	NA_x000D_ Shortening	PPP2R1B_exon_chr11:111597781	PPP2R1B_exon_chr11:111612336
TMEM63A	10.3615	29.7531	1.4513	0.035	UP	No	Yes	1	TMEM63A_exon_chr1:226034633	1	1	0	NA	2	NA	NA	NA	Shortening	TMEM63A_exon_chr1:226034633
DAGLA	2.4502	6.3919	1.45	0.9912	NC	No	No	1	DAGLA_exon_chr11:61511003	1	1	0	NA	1	1	1	1	NA	DAGLA_exon_chr11:61511003
KRT222	11.2695	30.6371	1.4465	0.0417	UP	No	Yes	2	KRT222_exon_chr17:38812882_x000D_ KRT222_exon_chr17:38818296	0.9234_x000D_ 0.0766	0.7991_x000D_ 0.2009	-0.1243_x000D_ 0.1243	NA_x000D_ NA	2_x000D_ 1	NA_x000D_ 1.0	NA_x000D_ 1.0	NA_x000D_ 1.0	Shortening_x000D_ NA	KRT222_exon_chr17:38812882	KRT222_exon_chr17:38818296
BRAF	18.9232	51.0763	1.444	0.0008	UP	No	Yes	2	BRAF_exon_chr7:140426316_x000D_ BRAF_exon_chr7:140434570	0.893_x000D_ 0.107	0.2972_x000D_ 0.7028	-0.5958_x000D_ 0.5958	NA_x000D_ Up	4_x000D_ 2	0.9602_x000D_ NA	0.5802_x000D_ NA	-0.3799_x000D_ NA	Shortening_x000D_ NA	BRAF_exon_chr7:140426316	BRAF_exon_chr7:140434570
KRAS	41.5116	113.028	1.4407	0	UP	No	Yes	1	KRAS_exon_chr12:25362845	1	1	0	NA	6	0.8891	0.1299	-0.7592	Both	KRAS_exon_chr12:25362845
CBX5	125.547	340.062	1.4405	0	UP	No	Yes	2	CBX5_exon_chr12:54635689_x000D_ CBX5_exon_chr12:54646011	0.3908_x000D_ 0.6092	0.4617_x000D_ 0.5383	0.071_x000D_ -0.071	NA_x000D_ NA	7_x000D_ 2	0.405_x000D_ 0.51	0.135_x000D_ 0.5451	-0.27_x000D_ 0.0351	Both_x000D_ NA	CBX5_exon_chr12:54635689	CBX5_exon_chr12:54646011
SAMD4B	2.5718	6.9585	1.4377	0.445	NC	No	No	1	SAMD4B_exon_chr19:39874138	1	1	0	NA	1	1	1	1	NA	SAMD4B_exon_chr19:39874138
MEAK7	40.2139	108.894	1.4371	0.0003	UP	No	Yes	1	MEAK7_exon_chr16:84513632	1	1	0	NA	2	0.7041	0.1476	-0.5565	Shortening	MEAK7_exon_chr16:84513632
FBXO25	33.544	91.8108	1.4369	0.0014	UP	No	No	1	FBXO25_exon_chr8:418714	1	1	0	NA	1	1	1	1	NA	FBXO25_exon_chr8:418714
ZNF222	2.6323	7.0771	1.4368	0.3704	NC	No	No	1	ZNF222_exon_chr19:44535969	1	1	0	NA	1	1	1	1	NA	ZNF222_exon_chr19:44535969
MAP3K20	93.9052	255.697	1.4349	0	UP	Yes	Yes	3	MAP3K20_exon_chr2:174085877_x000D_ MAP3K20_exon_chr2:174104131_x000D_ MAP3K20_exon_chr2:174130777	0.5578_x000D_ 0.118_x000D_ 0.3243	0.7597_x000D_ 0.1016_x000D_ 0.1388	0.2019_x000D_ -0.0164_x000D_ -0.1855	Up_x000D_ NA_x000D_ NA	3_x000D_ 1_x000D_ 2	0.4676_x000D_ 1.0_x000D_ 0.4521	0.4726_x000D_ 1.0_x000D_ 0.0419	0.005_x000D_ 1.0_x000D_ -0.4102	NA_x000D_ NA_x000D_ Shortening	MAP3K20_exon_chr2:174085877	MAP3K20_exon_chr2:174104131	MAP3K20_exon_chr2:174130777
ARIH2OS	1.674	4.4155	1.4338	1	NC	No	No	1	ARIH2OS_exon_chr3:48956818	1	1	0	NA	1	1	1	1	NA	ARIH2OS_exon_chr3:48956818
ANXA9	0.5097	1.5836	1.4338	1	NC	No	No	1	ANXA9_exon_chr1:150967735	1	1	0	NA	1	1	1	1	NA	ANXA9_exon_chr1:150967735
ABCG1	0.3881	0.9826	1.4335	1	NC	No	No	1	ABCG1_exon_chr21:43716273	1	1	0	NA	1	1	1	1	NA	ABCG1_exon_chr21:43716273
MCIDAS	0.2548	0.9508	1.4321	1	NC	No	No	1	MCIDAS_exon_chr5:54516634	1	1	0	NA	1	1	1	1	NA	MCIDAS_exon_chr5:54516634
STYX	77.4183	209.868	1.432	0	UP	No	Yes	1	STYX_exon_chr14:53237750	1	1	0	NA	7	0.7222	0.082	-0.6403	Shortening	STYX_exon_chr14:53237750
ZNF761	3.4332	9.4033	1.4307	0.2803	NC	No	No	2	ZNF761_exon_chr19:53953132_x000D_ ZNF761_exon_chr19:53957903	0.1769_x000D_ 0.8231	0.5638_x000D_ 0.4362	0.3869_x000D_ -0.3869	NA_x000D_ NA	1_x000D_ 1	1.0_x000D_ 1.0	1.0_x000D_ 1.0	1.0_x000D_ 1.0	NA_x000D_ NA	ZNF761_exon_chr19:53953132	ZNF761_exon_chr19:53957903
GATD3A	7.508	19.7921	1.4295	0.1319	NC	No	No	2	GATD3A_exon_chr21:45560131_x000D_ GATD3A_exon_chr21:45560823	0.2919_x000D_ 0.7081	0.4943_x000D_ 0.5057	0.2024_x000D_ -0.2024	NA_x000D_ NA	1_x000D_ 1	1.0_x000D_ 1.0	1.0_x000D_ 1.0	1.0_x000D_ 1.0	NA_x000D_ NA	GATD3A_exon_chr21:45560131	GATD3A_exon_chr21:45560823
F2R	18.3027	47.9073	1.4275	0.0115	UP	No	Yes	1	F2R_exon_chr5:76028138	1	1	0	NA	5	NA	NA	NA	Both	F2R_exon_chr5:76028138
PUM2	114.851	307.854	1.4263	0	UP	No	Yes	1	PUM2_exon_chr2:20451477	1	1	0	NA	10	0.7152	0.1456	-0.5696	Both	PUM2_exon_chr2:20451477
SLC12A6	20.6835	55.7669	1.4261	0.0067	UP	No	Yes	1	SLC12A6_exon_chr15:34526173	1	1	0	NA	2	NA	NA	NA	Shortening	SLC12A6_exon_chr15:34526173
CEP43	80.2279	215.464	1.4259	0	UP	No	No	1	CEP43_exon_chr6:167453391	1	1	0	NA	4	0.8789	0.8346	-0.0443	NA	CEP43_exon_chr6:167453391
MED29	120.041	322.22	1.4253	0	UP	No	Yes	1	MED29_exon_chr19:39888096	1	1	0	NA	4	0.2473	0.0608	-0.1865	Shortening	MED29_exon_chr19:39888096
ATP6V1D	56.9049	152.931	1.4243	0	UP	No	Yes	1	ATP6V1D_exon_chr14:67805479	1	1	0	NA	5	0.665	0.3481	-0.3169	Both	ATP6V1D_exon_chr14:67805479
CDC14A	2.3658	6.6898	1.4217	0.3388	NC	No	No	1	CDC14A_exon_chr1:100983806	1	1	0	NA	3	NA	NA	NA	NA	CDC14A_exon_chr1:100983806
SPATA6	2.8624	7.2849	1.421	1	NC	No	No	1	SPATA6_exon_chr1:48764565	1	1	0	NA	2	NA	NA	NA	NA	SPATA6_exon_chr1:48764565
HIGD1A	227.011	608.472	1.4206	0	UP	No	Yes	1	HIGD1A_exon_chr3:42826812	1	1	0	NA	4	0.6193	0.1422	-0.4771	Shortening	HIGD1A_exon_chr3:42826812
FAM167B	1.0915	2.8668	1.4204	1	NC	No	No	1	FAM167B_exon_chr1:32713971	1	1	0	NA	1	1	1	1	NA	FAM167B_exon_chr1:32713971
SLC9A2	0.3881	0.9508	1.4199	1	NC	No	No	1	SLC9A2_exon_chr2:103324577	1	1	0	NA	1	1	1	1	NA	SLC9A2_exon_chr2:103324577
APOOL	33.0055	86.8979	1.4184	0	UP	No	Yes	1	APOOL_exon_chrX:84342595	1	1	0	NA	2	0.8332	0.1112	-0.7219	Shortening	APOOL_exon_chrX:84342595
POLN	0.7645	2.2657	1.4181	1	NC	No	No	1	POLN_exon_chr4:2074026	1	1	0	NA	1	1	1	1	NA	POLN_exon_chr4:2074026
SLC2A11	6.2832	16.3845	1.4156	0.1028	NC	No	No	2	SLC2A11_exon_chr22:24224945_x000D_ SLC2A11_exon_chr22:24226809	0.1428_x000D_ 0.8572	0.849_x000D_ 0.151	0.7062_x000D_ -0.7062	Up_x000D_ NA	1_x000D_ 1	1.0_x000D_ 1.0	1.0_x000D_ 1.0	1.0_x000D_ 1.0	NA_x000D_ NA	SLC2A11_exon_chr22:24224945	SLC2A11_exon_chr22:24226809
C14orf28	3.3598	8.8485	1.4155	0.405	NC	No	No	1	C14orf28_exon_chr14:45374569	1	1	0	NA	2	NA	NA	NA	NA	C14orf28_exon_chr14:45374569
PSD3	24.8685	67.2062	1.4141	0.0019	UP	No	Yes	1	PSD3_exon_chr8:18393468	1	1	0	NA	4	0.7001	0.3179	-0.3822	Shortening	PSD3_exon_chr8:18393468
ZNF780B	6.9139	18.1851	1.4129	0.1059	NC	No	No	1	ZNF780B_exon_chr19:40542533	1	1	0	NA	2	NA	NA	NA	NA	ZNF780B_exon_chr19:40542533
PBX1	5.1668	13.224	1.4116	0.3485	NC	No	Yes	2	PBX1_exon_chr1:164815820_x000D_ PBX1_exon_chr1:164853778	1.0_x000D_ 0.0	0.8647_x000D_ 0.1353	-0.1353_x000D_ 0.1353	NA_x000D_ NA	2_x000D_ 1	NA_x000D_ 1.0	NA_x000D_ 1.0	NA_x000D_ 1.0	Shortening_x000D_ NA	PBX1_exon_chr1:164815820	PBX1_exon_chr1:164853778
C2orf27B	1.5524	3.878	1.4111	1	NC	No	No	1	C2orf27B_exon_chr2:132553319	1	1	0	NA	1	1	1	1	NA	C2orf27B_exon_chr2:132553319
LINC01970	0.3517	0.9508	1.41	1	NC	No	No	1	LINC01970_exon_chr17:80249439	1	1	0	NA	2	NA	NA	NA	NA	LINC01970_exon_chr17:80249439
ABCA11P	2.0504	5.5335	1.4099	1	NC	No	No	1	ABCA11P_exon_chr4:420762	1	1	0	NA	1	1	1	1	NA	ABCA11P_exon_chr4:420762
CHRFAM7A	9.0872	25.0079	1.4082	0.085	UP	No	No	1	CHRFAM7A_exon_chr15:30655014	1	1	0	NA	2	NA	NA	NA	NA	CHRFAM7A_exon_chr15:30655014
NAP1L5	2.0388	5.8603	1.4078	1	NC	No	No	1	NAP1L5_exon_chr4:89618980	1	1	0	NA	1	1	1	1	NA	NAP1L5_exon_chr4:89618980
LOC150051	4.6943	12.2354	1.4064	0.3188	NC	No	No	1	LOC150051_exon_chr21:32932329	1	1	0	NA	1	1	1	1	NA	LOC150051_exon_chr21:32932329
PLD1	6.2344	16.0093	1.4061	0.1679	NC	No	Yes	1	PLD1_exon_chr3:171321092	1	1	0	NA	3	NA	NA	NA	Shortening	PLD1_exon_chr3:171321092
KRT32	3.3363	9.0656	1.4059	1	NC	No	No	1	KRT32_exon_chr17:39616491	1	1	0	NA	2	NA	NA	NA	NA	KRT32_exon_chr17:39616491
EXOG	4.8771	13.215	1.4054	0.2913	NC	No	No	1	EXOG_exon_chr3:38565391	1	1	0	NA	3	NA	NA	NA	NA	EXOG_exon_chr3:38565391
POLK	31.0639	81.4341	1.4032	0.0008	UP	No	Yes	2	POLK_exon_chr5:74842834_x000D_ POLK_exon_chr5:74893758	0.1028_x000D_ 0.8723	0.0374_x000D_ 0.9483	-0.0654_x000D_ 0.076	NA_x000D_ NA	1_x000D_ 5	1.0_x000D_ 0.5057	1.0_x000D_ 0.0987	1.0_x000D_ NA	NA_x000D_ Both	POLK_exon_chr5:74842834	POLK_exon_chr5:74893758
BCLAF3	3.8577	10.1488	1.4027	0.386	NC	No	No	1	BCLAF3_exon_chrX:19935452	1	1	0	NA	3	NA	NA	NA	NA	BCLAF3_exon_chrX:19935452
NUDT16P1	15.0427	40.0898	1.3998	0.023	UP	No	No	1	NUDT16P1_exon_chr3:131082199	1	1	0	NA	2	NA	NA	NA	NA	NUDT16P1_exon_chr3:131082199
SENP3-EIF4A1	7.3754	19.5349	1.399	0.0985	UP	No	Yes	1	SENP3-EIF4A1_exon_chr17:7474690	1	1	0	NA	2	NA	NA	NA	Shortening	SENP3-EIF4A1_exon_chr17:7474690
FAM136A	140.784	373.729	1.398	0	UP	No	Yes	1	FAM136A_exon_chr2:70524609	1	1	0	NA	4	0.4765	0.1248	-0.3517	Shortening	FAM136A_exon_chr2:70524609
BRCA2	3.2031	8.7762	1.3978	0.4865	NC	No	No	2	BRCA2_exon_chr13:32937315_x000D_ BRCA2_exon_chr13:32972298	0.6814_x000D_ 0.3186	0.5497_x000D_ 0.4503	-0.1317_x000D_ 0.1317	NA_x000D_ NA	1_x000D_ 2	1.0_x000D_ NA	1.0_x000D_ NA	1.0_x000D_ NA	NA_x000D_ NA	BRCA2_exon_chr13:32937315	BRCA2_exon_chr13:32972298
NLRX1	2.3169	6.1092	1.3967	0.5355	NC	No	No	1	NLRX1_exon_chr11:119053826	1	1	0	NA	1	1	1	1	NA	NLRX1_exon_chr11:119053826
TMEM40	32.9817	86.648	1.3952	0.0004	UP	No	No	1	TMEM40_exon_chr3:12776292	1	1	0	NA	1	1	1	1	NA	TMEM40_exon_chr3:12776292
RPH3AL	9.0137	24.1473	1.3943	0.0775	UP	No	No	1	RPH3AL_exon_chr17:63714	1	1	0	NA	1	1	1	1	NA	RPH3AL_exon_chr17:63714
PTPRJ	36.6945	96.8318	1.3938	0.0001	UP	No	Yes	2	PTPRJ_exon_chr11:48153062_x000D_ PTPRJ_exon_chr11:48188755	0.1153_x000D_ 0.8847	0.1556_x000D_ 0.8444	0.0403_x000D_ -0.0403	NA_x000D_ NA	1_x000D_ 7	1.0_x000D_ 0.8216	1.0_x000D_ 0.4851	1.0_x000D_ -0.3364	NA_x000D_ Both	PTPRJ_exon_chr11:48153062	PTPRJ_exon_chr11:48188755
RALGAPA2	2.9235	7.6637	1.3925	0.3823	NC	No	No	1	RALGAPA2_exon_chr20:20373897	1	1	0	NA	3	NA	NA	NA	NA	RALGAPA2_exon_chr20:20373897
CHRNA7	9.0872	24.7074	1.3918	0.0985	UP	No	No	1	CHRNA7_exon_chr15:32460140	1	1	0	NA	2	NA	NA	NA	NA	CHRNA7_exon_chr15:32460140
MICU2	142.756	373.362	1.3905	0	UP	No	Yes	1	MICU2_exon_chr13:22067492	1	1	0	NA	3	0.9358	0.2258	-0.71	Shortening	MICU2_exon_chr13:22067492
ALPK1	4.6338	12.01	1.389	0.266	NC	No	Yes	1	ALPK1_exon_chr4:113362358	1	1	0	NA	2	NA	NA	NA	Shortening	ALPK1_exon_chr4:113362358
TRMT2B	12.4826	32.8772	1.3879	0.0124	UP	No	No	1	TRMT2B_exon_chrX:100265696	1	1	0	NA	1	1	1	1	NA	TRMT2B_exon_chrX:100265696
REEP3	63.1354	163.767	1.3857	0	UP	No	Yes	1	REEP3_exon_chr10:65380572	1	1	0	NA	7	0.5384	0.0692	-0.4693	Shortening	REEP3_exon_chr10:65380572
ATP8B1	13.7562	35.7221	1.3854	0.0284	UP	No	Yes	1	ATP8B1_exon_chr18:55315944	1	1	0	NA	2	0.6041	0.0813	-0.5227	Shortening	ATP8B1_exon_chr18:55315944
LTBP1	8.199	20.3666	1.3849	0.0951	UP	No	Yes	1	LTBP1_exon_chr2:33623430	1	1	0	NA	2	NA	NA	NA	Shortening	LTBP1_exon_chr2:33623430
LINC02562	0.5097	1.4709	1.3834	1	NC	No	No	1	LINC02562_exon_chr4:76007567	1	1	0	NA	1	1	1	1	NA	LINC02562_exon_chr4:76007567
LINC00312	5.3737	13.8392	1.3833	0.3333	NC	No	No	1	LINC00312_exon_chr3:8609125	1	1	0	NA	2	NA	NA	NA	NA	LINC00312_exon_chr3:8609125
KBTBD3	4.5	11.4234	1.3829	0.3431	NC	No	No	2	KBTBD3_exon_chr11:105925182_x000D_ KBTBD3_exon_chr11:105929836	1.0_x000D_ 0.0	1.0_x000D_ 0.0	0.0_x000D_ 0.0	NA_x000D_ NA	1_x000D_ 1	1.0_x000D_ 1.0	1.0_x000D_ 1.0	1.0_x000D_ 1.0	NA_x000D_ NA	KBTBD3_exon_chr11:105925182	KBTBD3_exon_chr11:105929836
ZNF485	1.674	4.274	1.3825	1	NC	No	No	1	ZNF485_exon_chr10:44111738	1	1	0	NA	1	1	1	1	NA	ZNF485_exon_chr10:44111738
LNPEP	49.0424	127.324	1.3819	0	UP	No	Yes	1	LNPEP_exon_chr5:96364105	1	1	0	NA	3	0.8502	0.1337	-0.7165	Shortening	LNPEP_exon_chr5:96364105
LTK	1.9172	5.3662	1.3797	1	NC	No	No	1	LTK_exon_chr15:41796442	1	1	0	NA	1	1	1	1	NA	LTK_exon_chr15:41796442
MCFD2	250.686	652.65	1.3792	0	UP	No	Yes	1	MCFD2_exon_chr2:47132733	1	1	0	NA	6	0.4116	0.0942	-0.3174	Shortening	MCFD2_exon_chr2:47132733
TTLL7	21.7491	56.0265	1.3779	0.0051	UP	No	Yes	2	TTLL7_exon_chr1:84335765_x000D_ TTLL7_exon_chr1:84417659	0.9559_x000D_ 0.0441	0.9366_x000D_ 0.0634	-0.0193_x000D_ 0.0193	NA_x000D_ NA	1_x000D_ 5	1.0_x000D_ 0.6829	1.0_x000D_ 0.0918	1.0_x000D_ -0.5911	NA_x000D_ Both	TTLL7_exon_chr1:84335765	TTLL7_exon_chr1:84417659
BTBD9	5.9686	15.6711	1.3778	0.1384	NC	No	Yes	1	BTBD9_exon_chr6:38142958	1	1	0	NA	4	NA	NA	NA	Shortening	BTBD9_exon_chr6:38142958
ADGRG6	80.562	211.53	1.3777	0	UP	No	Yes	2	ADGRG6_exon_chr6:142723756_x000D_ ADGRG6_exon_chr6:142764473	0.1703_x000D_ 0.7852	0.1553_x000D_ 0.7996	-0.015_x000D_ 0.0144	NA_x000D_ NA	2_x000D_ 1	0.9358_x000D_ 1.0	0.2306_x000D_ 1.0	-0.7052_x000D_ 1.0	Shortening_x000D_ NA	ADGRG6_exon_chr6:142723756	ADGRG6_exon_chr6:142764473
KLF12	1.1643	2.699	1.375	1	NC	No	No	1	KLF12_exon_chr13:74269808	1	1	0	NA	2	NA	NA	NA	NA	KLF12_exon_chr13:74269808
LNX1	1.4432	3.6703	1.3742	1	NC	No	No	1	LNX1_exon_chr4:54327209	1	1	0	NA	1	1	1	1	NA	LNX1_exon_chr4:54327209
B4GALT5	238.427	618.669	1.3695	0	UP	No	Yes	1	B4GALT5_exon_chr20:48252996	1	1	0	NA	3	0.9742	0.4447	-0.5295	Both	B4GALT5_exon_chr20:48252996
LINC00239	3.4201	8.4239	1.3686	0.6132	NC	No	No	1	LINC00239_exon_chr14:102198572	1	1	0	NA	1	1	1	1	NA	LINC00239_exon_chr14:102198572
SLC10A7	4.9733	12.7499	1.3665	0.3109	NC	No	Yes	2	SLC10A7_exon_chr4:147177672_x000D_ SLC10A7_exon_chr4:147436303	1.0_x000D_ 0.0	0.9199_x000D_ 0.0	-0.0801_x000D_ 0.0	NA_x000D_ NA	1_x000D_ 3	1.0_x000D_ NA	1.0_x000D_ NA	1.0_x000D_ NA	NA_x000D_ Shortening	SLC10A7_exon_chr4:147177672	SLC10A7_exon_chr4:147436303
TGFBI	0.7645	2.0461	1.3648	1	NC	No	No	1	TGFBI_exon_chr5:135398874	1	1	0	NA	1	1	1	1	NA	TGFBI_exon_chr5:135398874
PRSS35	0.3881	0.9016	1.3635	1	NC	No	No	1	PRSS35_exon_chr6:84233140	1	1	0	NA	1	1	1	1	NA	PRSS35_exon_chr6:84233140
CAGE1	0.2548	0.9016	1.363	1	NC	No	No	1	CAGE1_exon_chr6:7327132	1	1	0	NA	1	1	1	1	NA	CAGE1_exon_chr6:7327132
LETM2	11.3204	30.4493	1.3624	0.0802	UP	No	Yes	1	LETM2_exon_chr8:38265729	1	1	0	NA	3	NA	NA	NA	Shortening	LETM2_exon_chr8:38265729
HDAC4	23.4829	59.8799	1.3619	0.0128	UP	No	Yes	1	HDAC4_exon_chr2:239974832	1	1	0	NA	4	0.5553	0.0736	-0.4817	Shortening	HDAC4_exon_chr2:239974832
RNASEH2C	35.6779	93.1427	1.3601	0	UP	No	No	1	RNASEH2C_exon_chr11:65487280	1	1	0	NA	3	0.179	0.1713	-0.0076	NA	RNASEH2C_exon_chr11:65487280
HMGB3	885.936	2270.63	1.3582	0	UP	No	Yes	1	HMGB3_exon_chrX:150156249	1	1	0	NA	5	0.2367	0.0721	-0.1646	Both	HMGB3_exon_chrX:150156249
BHLHE41	1.031	2.6067	1.358	1	NC	No	No	1	BHLHE41_exon_chr12:26276101	1	1	0	NA	1	1	1	1	NA	BHLHE41_exon_chr12:26276101
LOC642361	2.0504	5.5744	1.3575	0.54	NC	No	No	1	LOC642361_exon_chr10:81585657	1	1	0	NA	2	NA	NA	NA	NA	LOC642361_exon_chr10:81585657
RICTOR	24.6013	63.5309	1.3575	0.0003	UP	No	Yes	1	RICTOR_exon_chr5:38942480	1	1	0	NA	5	0.9383	0.1622	-0.7761	Shortening	RICTOR_exon_chr5:38942480
GJA3	7.0607	18.4456	1.3572	0.1744	NC	No	Yes	1	GJA3_exon_chr13:20717444	1	1	0	NA	2	NA	NA	NA	Shortening	GJA3_exon_chr13:20717444
UGT8	28.6993	72.1247	1.356	0.0002	UP	No	Yes	1	UGT8_exon_chr4:115597080	1	1	0	NA	4	0.835	0.1648	-0.6703	Shortening	UGT8_exon_chr4:115597080
APOLD1	1.2859	3.2596	1.3539	1	NC	No	No	1	APOLD1_exon_chr12:12939842	1	1	0	NA	2	NA	NA	NA	NA	APOLD1_exon_chr12:12939842
SPRTN	24.4532	62.0895	1.3531	0.0069	UP	No	Yes	1	SPRTN_exon_chr1:231487049	1	1	0	NA	5	0.5127	0.1871	NA	Both	SPRTN_exon_chr1:231487049
C15orf40	30.9572	78.8815	1.3523	0.0003	UP	No	Yes	1	C15orf40_exon_chr15:83674444	1	1	0	NA	5	0.4815	0.0594	-0.4222	Shortening	C15orf40_exon_chr15:83674444
ROCK1P1	2.8383	6.9352	1.3497	1	NC	No	No	1	ROCK1P1_exon_chr18:120700	1	1	0	NA	1	1	1	1	NA	ROCK1P1_exon_chr18:120700
ST13P4	3.324	8.6003	1.3488	0.6914	NC	No	No	1	ST13P4_exon_chr13:50746153	1	1	0	NA	1	1	1	1	NA	ST13P4_exon_chr13:50746153
CDK5R1	5.3868	14.1543	1.3482	0.2562	NC	No	Yes	1	CDK5R1_exon_chr17:30814493	1	1	0	NA	3	NA	NA	NA	Both	CDK5R1_exon_chr17:30814493
ST3GAL5	6.9996	18.0064	1.3477	0.1354	NC	No	No	1	ST3GAL5_exon_chr2:86067515	1	1	0	NA	2	NA	NA	NA	NA	ST3GAL5_exon_chr2:86067515
PANK1	2.0621	5.0542	1.3475	1	NC	No	No	1	PANK1_exon_chr10:91344222	1	1	0	NA	1	1	1	1	NA	PANK1_exon_chr10:91344222
ZGRF1	7.2545	18.4506	1.3467	0.1053	NC	No	No	1	ZGRF1_exon_chr4:113460845	1	1	0	NA	3	NA	NA	NA	NA	ZGRF1_exon_chr4:113460845
APH1B	9.9457	24.3319	1.343	0.1113	NC	No	No	1	APH1B_exon_chr15:63597812	1	1	0	NA	2	NA	NA	NA	NA	APH1B_exon_chr15:63597812
FBLN5	2.1837	5.6063	1.3427	1	NC	No	No	1	FBLN5_exon_chr14:92336729	1	1	0	NA	1	1	1	1	NA	FBLN5_exon_chr14:92336729
IRF1-AS1	1.2859	3.3292	1.3415	1	NC	No	No	1	IRF1-AS1_exon_chr5:131811358	1	1	0	NA	1	1	1	1	NA	IRF1-AS1_exon_chr5:131811358
H2BC12	14.4114	36.6453	1.341	0.0164	UP	No	No	2	H2BC12_exon_chr6:27106460_x000D_ H2BC12_exon_chr6:27114637	0.8216_x000D_ 0.1784	0.8634_x000D_ 0.1366	0.0418_x000D_ -0.0418	NA_x000D_ NA	3_x000D_ 1	NA_x000D_ 1.0	NA_x000D_ 1.0	NA_x000D_ 1.0	NA_x000D_ NA	H2BC12_exon_chr6:27106460	H2BC12_exon_chr6:27114637
IRF9	6.6356	16.9282	1.3404	0.2178	NC	No	No	1	IRF9_exon_chr14:24635330	1	1	0	NA	1	1	1	1	NA	IRF9_exon_chr14:24635330
IRX3	0.3881	0.8785	1.3384	1	NC	No	No	1	IRX3_exon_chr16:54317652	1	1	0	NA	1	1	1	1	NA	IRX3_exon_chr16:54317652
FAM166C	4.6099	11.9264	1.3358	0.3488	NC	No	No	1	FAM166C_exon_chr2:26802161	1	1	0	NA	1	1	1	1	NA	FAM166C_exon_chr2:26802161
TMEM245	60.8574	152.856	1.3355	0	UP	No	Yes	1	TMEM245_exon_chr9:111782785	1	1	0	NA	4	0.8089	0.1656	-0.6433	Both	TMEM245_exon_chr9:111782785
RBSN	34.6966	88.6552	1.3339	0.0013	UP	No	Yes	2	RBSN_exon_chr3:15116437_x000D_ RBSN_exon_chr3:15137795	0.8262_x000D_ 0.1738	0.7827_x000D_ 0.2173	-0.0436_x000D_ 0.0436	NA_x000D_ NA	2_x000D_ 2	0.798_x000D_ NA	0.1762_x000D_ NA	-0.6219_x000D_ NA	Shortening_x000D_ NA	RBSN_exon_chr3:15116437	RBSN_exon_chr3:15137795
MRVI1-AS1	0.3881	0.8698	1.3338	1	NC	No	No	1	MRVI1-AS1_exon_chr11:10621237	1	1	0	NA	1	1	1	1	NA	MRVI1-AS1_exon_chr11:10621237
AFAP1	15.6244	39.0809	1.3336	0.0201	UP	No	Yes	1	AFAP1_exon_chr4:7765518	1	1	0	NA	9	NA	NA	NA	Both	AFAP1_exon_chr4:7765518
ZNF675	4.7307	11.6312	1.3304	0.3568	NC	No	No	1	ZNF675_exon_chr19:23837508	1	1	0	NA	2	NA	NA	NA	NA	ZNF675_exon_chr19:23837508
PRG2	0.2548	0.8785	1.3299	1	NC	No	No	1	PRG2_exon_chr11:57155006	1	1	0	NA	1	1	1	1	NA	PRG2_exon_chr11:57155006
CACFD1	5.2281	13.0964	1.3297	0.3895	NC	No	No	1	CACFD1_exon_chr9:136333684	1	1	0	NA	1	1	1	1	NA	CACFD1_exon_chr9:136333684
PRPH	5.0701	12.6056	1.3294	0.2947	NC	No	No	1	PRPH_exon_chr12:49692070	1	1	0	NA	1	1	1	1	NA	PRPH_exon_chr12:49692070
SCAT1	6.6356	16.8966	1.3294	0.1572	NC	No	No	1	SCAT1_exon_chr17:76615126	1	1	0	NA	1	1	1	1	NA	SCAT1_exon_chr17:76615126
BET1	29.2811	72.4643	1.3288	0.0006	UP	No	Yes	1	BET1_exon_chr7:93623697	1	1	0	NA	2	0.7213	0.0732	-0.6481	Shortening	BET1_exon_chr7:93623697
PTEN	127.773	321.095	1.3276	0	UP	No	Yes	1	PTEN_exon_chr10:89725043	1	1	0	NA	9	0.4219	0.0536	-0.3683	Shortening	PTEN_exon_chr10:89725043
LTBP2	0.2548	0.8785	1.3275	1	NC	No	No	1	LTBP2_exon_chr14:74967732	1	1	0	NA	1	1	1	1	NA	LTBP2_exon_chr14:74967732
ZNF816-ZNF321P	1.5407	4.0199	1.3261	1	NC	No	No	1	ZNF816-ZNF321P_exon_chr19:53432667	1	1	0	NA	2	NA	NA	NA	NA	ZNF816-ZNF321P_exon_chr19:53432667
CAB39	92.2663	232.469	1.3252	0	UP	No	Yes	1	CAB39_exon_chr2:231683230	1	1	0	NA	4	0.9428	0.23	-0.7128	Shortening	CAB39_exon_chr2:231683230
HOOK1	109.796	276.482	1.3248	0	UP	Yes	Yes	4	HOOK1_exon_chr1:60313986_x000D_ HOOK1_exon_chr1:60324099_x000D_ HOOK1_exon_chr1:60331543_x000D_ HOOK1_exon_chr1:60338466	0.3583_x000D_ 0.1205_x000D_ 0.1039_x000D_ 0.3361	0.1818_x000D_ 0.0468_x000D_ 0.0356_x000D_ 0.7086	-0.1765_x000D_ -0.0737_x000D_ -0.0684_x000D_ 0.3725	NA_x000D_ NA_x000D_ NA_x000D_ Up	1_x000D_ 1_x000D_ 1_x000D_ 6	1.0_x000D_ 1.0_x000D_ 1.0_x000D_ 0.7507	1.0_x000D_ 1.0_x000D_ 1.0_x000D_ 0.1088	1.0_x000D_ 1.0_x000D_ 1.0_x000D_ -0.6419	NA_x000D_ NA_x000D_ NA_x000D_ Shortening	HOOK1_exon_chr1:60313986	HOOK1_exon_chr1:60324099	HOOK1_exon_chr1:60331543	HOOK1_exon_chr1:60338466
GDF11	40.069	100.803	1.3246	0.0002	UP	No	No	1	GDF11_exon_chr12:56143285	1	1	0	NA	7	0.2375	0.2507	0.0133	NA	GDF11_exon_chr12:56143285
OXCT2P1	5.4109	13.7373	1.3241	0.3222	NC	No	No	1	OXCT2P1_exon_chr1:39980537	1	1	0	NA	1	1	1	1	NA	OXCT2P1_exon_chr1:39980537
NPEPPSP1	11.1844	28.0971	1.324	0.0508	UP	No	No	1	NPEPPSP1_exon_chr17:36351996	1	1	0	NA	1	1	1	1	NA	NPEPPSP1_exon_chr17:36351996
SMAD3	37.255	94.1097	1.3225	0.0002	UP	No	Yes	1	SMAD3_exon_chr15:67482750	1	1	0	NA	3	0.438	0.1229	-0.3152	Shortening	SMAD3_exon_chr15:67482750
FAM72B	71.57	178.578	1.3205	0.0001	UP	No	Yes	1	FAM72B_exon_chr1:120854491	1	1	0	NA	2	0.7724	0.1178	-0.6546	Shortening	FAM72B_exon_chr1:120854491
USP43	2.2922	5.3602	1.3193	1	NC	No	No	1	USP43_exon_chr17:9631270	1	1	0	NA	1	1	1	1	NA	USP43_exon_chr17:9631270
GPR3	2.5485	7.074	1.3191	0.535	NC	No	No	1	GPR3_exon_chr1:27720297	1	1	0	NA	1	1	1	1	NA	GPR3_exon_chr1:27720297
CFAP65	1.4075	3.7857	1.3189	1	NC	No	No	1	CFAP65_exon_chr2:219867743	1	1	0	NA	1	1	1	1	NA	CFAP65_exon_chr2:219867743
DYNLT3	47.3318	117.365	1.3189	0.0001	UP	No	Yes	1	DYNLT3_exon_chrX:37699904	1	1	0	NA	3	0.7532	0.1712	-0.582	Shortening	DYNLT3_exon_chrX:37699904
GRAMD4	9.9472	24.7245	1.3183	0.0785	UP	No	Yes	1	GRAMD4_exon_chr22:47073043	1	1	0	NA	2	NA	NA	NA	Shortening	GRAMD4_exon_chr22:47073043
GRAMD2A	2.7902	6.9988	1.3179	0.4559	NC	No	No	1	GRAMD2A_exon_chr15:72454353	1	1	0	NA	1	1	1	1	NA	GRAMD2A_exon_chr15:72454353
ZNF714	7.2663	18.2024	1.3136	0.0777	UP	No	Yes	1	ZNF714_exon_chr19:21299612	1	1	0	NA	4	NA	NA	NA	Shortening	ZNF714_exon_chr19:21299612
JMJD1C-AS1	3.2388	8.0915	1.3123	0.3443	NC	No	No	1	JMJD1C-AS1_exon_chr10:65224988	1	1	0	NA	2	NA	NA	NA	NA	JMJD1C-AS1_exon_chr10:65224988
ICAM1	4.4395	10.8223	1.3091	0.5372	NC	No	No	1	ICAM1_exon_chr19:10395790	1	1	0	NA	2	NA	NA	NA	NA	ICAM1_exon_chr19:10395790
ZBTB21	19.6395	48.3822	1.3082	0.0126	UP	No	Yes	1	ZBTB21_exon_chr21:43414217	1	1	0	NA	3	0.8091	0.2181	-0.591	Shortening	ZBTB21_exon_chr21:43414217
ZNF174	4.0755	9.7412	1.3074	0.3355	NC	No	No	2	ZNF174_exon_chr16:3454425_x000D_ ZNF174_exon_chr16:3458320	0.095_x000D_ 0.905	0.4235_x000D_ 0.5765	0.3285_x000D_ -0.3285	NA_x000D_ NA	1_x000D_ 1	1.0_x000D_ 1.0	1.0_x000D_ 1.0	1.0_x000D_ 1.0	NA_x000D_ NA	ZNF174_exon_chr16:3454425	ZNF174_exon_chr16:3458320
CGB8	0.8978	2.2452	1.3063	1	NC	No	No	1	CGB8_exon_chr19:49551226	1	1	0	NA	1	1	1	1	NA	CGB8_exon_chr19:49551226
RNF141	237.437	587.891	1.3063	0	UP	No	Yes	1	RNF141_exon_chr11:10536613	1	1	0	NA	10	0.5857	0.0573	-0.5284	Shortening	RNF141_exon_chr11:10536613
SVIL-AS1	11.4509	27.9494	1.306	0.032	UP	No	No	3	SVIL-AS1_exon_chr10:29709393_x000D_ SVIL-AS1_exon_chr10:29756168_x000D_ SVIL-AS1_exon_chr10:29771761	0.6918_x000D_ 0.0784_x000D_ 0.2298	0.8617_x000D_ 0.1171_x000D_ 0.0212	0.1699_x000D_ 0.0387_x000D_ -0.2086	Up_x000D_ NA_x000D_ NA	1_x000D_ 2_x000D_ 1	1.0_x000D_ NA_x000D_ 1.0	1.0_x000D_ NA_x000D_ 1.0	1.0_x000D_ NA_x000D_ 1.0	NA_x000D_ NA_x000D_ NA	SVIL-AS1_exon_chr10:29709393	SVIL-AS1_exon_chr10:29756168	SVIL-AS1_exon_chr10:29771761
ANKRD18B	2.4021	6.0772	1.3057	0.7302	NC	No	No	1	ANKRD18B_exon_chr9:33567100	1	1	0	NA	1	1	1	1	NA	ANKRD18B_exon_chr9:33567100
MAP3K13	20.5616	51.3457	1.3055	0.0051	UP	No	Yes	2	MAP3K13_exon_chr3:185009400_x000D_ MAP3K13_exon_chr3:185200142	0.7351_x000D_ 0.2649	0.769_x000D_ 0.231	0.0339_x000D_ -0.0339	NA_x000D_ NA	4_x000D_ 2	0.9194_x000D_ NA	0.2614_x000D_ NA	-0.6579_x000D_ NA	Shortening_x000D_ Shortening	MAP3K13_exon_chr3:185009400	MAP3K13_exon_chr3:185200142
ZMYM3	37.3381	92.5412	1.3055	0	UP	Yes	Yes	2	ZMYM3_exon_chrX:70460958_x000D_ ZMYM3_exon_chrX:70469529	0.2583_x000D_ 0.7417	0.3899_x000D_ 0.6101	0.1315_x000D_ -0.1315	Up_x000D_ Down	1_x000D_ 2	1.0_x000D_ 0.8341	1.0_x000D_ 0.2441	1.0_x000D_ -0.59	NA_x000D_ Shortening	ZMYM3_exon_chrX:70460958	ZMYM3_exon_chrX:70469529
TMEM200A	11.6089	28.4868	1.3026	0.0568	UP	No	Yes	1	TMEM200A_exon_chr6:130761551	1	1	0	NA	6	0.8884	0.5774	NA	Both	TMEM200A_exon_chr6:130761551
CD46	88.5863	217.499	1.3003	0	UP	No	Yes	1	CD46_exon_chr1:207966863	1	1	0	NA	6	0.9383	0.4482	-0.49	Both	CD46_exon_chr1:207966863
SH3BGRL2	10.443	24.6264	1.2999	0.1314	NC	No	Yes	1	SH3BGRL2_exon_chr6:80409214	1	1	0	NA	5	NA	NA	NA	Both	SH3BGRL2_exon_chr6:80409214
LYRM7	18.2451	45.1605	1.2988	0.0033	UP	No	Yes	1	LYRM7_exon_chr5:130535223	1	1	0	NA	7	0.7904	0.2601	-0.5303	Both	LYRM7_exon_chr5:130535223
SLC25A51	12.1551	30.3975	1.2981	0.0449	UP	Yes	Yes	2	SLC25A51_exon_chr9:37880745_x000D_ SLC25A51_exon_chr9:37888589	0.6027_x000D_ 0.3973	0.1938_x000D_ 0.8062	-0.4089_x000D_ 0.4089	NA_x000D_ Up	2_x000D_ 3	NA_x000D_ NA	NA_x000D_ NA	NA_x000D_ NA	Shortening_x000D_ NA	SLC25A51_exon_chr9:37880745	SLC25A51_exon_chr9:37888589
SNX21	8.14	20.2572	1.2979	0.1698	NC	No	No	1	SNX21_exon_chr20:44469277	1	1	0	NA	3	NA	NA	NA	NA	SNX21_exon_chr20:44469277
BORA	24.3592	60.2692	1.2976	0.0044	UP	No	No	1	BORA_exon_chr13:73329288	1	1	0	NA	1	1	1	1	NA	BORA_exon_chr13:73329288
FGD6	18.5488	46.4621	1.2975	0.0143	UP	No	Yes	2	FGD6_exon_chr12:95475332_x000D_ FGD6_exon_chr12:95486621	0.8069_x000D_ 0.1931	0.9854_x000D_ 0.0146	0.1784_x000D_ -0.1784	Up_x000D_ NA	2_x000D_ 1	NA_x000D_ 1.0	NA_x000D_ 1.0	NA_x000D_ 1.0	Shortening_x000D_ NA	FGD6_exon_chr12:95475332	FGD6_exon_chr12:95486621
DHDH	4.2939	10.4406	1.2972	0.4072	NC	No	No	1	DHDH_exon_chr19:49448080	1	1	0	NA	1	1	1	1	NA	DHDH_exon_chr19:49448080
LOC101927278	1.2131	3.1123	1.2963	1	NC	No	No	1	LOC101927278_exon_chr10:100213259	1	1	0	NA	1	1	1	1	NA	LOC101927278_exon_chr10:100213259
TMEM92	15.393	37.3011	1.2955	0.0604	UP	No	No	1	TMEM92_exon_chr17:48356555	1	1	0	NA	1	1	1	1	NA	TMEM92_exon_chr17:48356555
TMX4	27.1354	66.7541	1.295	0.0007	UP	No	Yes	1	TMX4_exon_chr20:7963268	1	1	0	NA	5	0.2588	0.1647	-0.0941	Both	TMX4_exon_chr20:7963268
CDC42EP5	0.7762	1.8119	1.2933	1	NC	No	No	1	CDC42EP5_exon_chr19:54976731	1	1	0	NA	1	1	1	1	NA	CDC42EP5_exon_chr19:54976731
WFDC21P	8.5666	21.127	1.2914	0.9236	NC	No	No	1	WFDC21P_exon_chr17:58161127	1	1	0	NA	1	1	1	1	NA	WFDC21P_exon_chr17:58161127
DCP2	22.9993	56.1658	1.2886	0.0014	UP	No	Yes	1	DCP2_exon_chr5:112349017	1	1	0	NA	9	0.8206	0.4199	-0.4007	Both	DCP2_exon_chr5:112349017
PIGL	5.3002	12.3884	1.2881	0.2397	NC	No	No	1	PIGL_exon_chr17:16229113	1	1	0	NA	1	1	1	1	NA	PIGL_exon_chr17:16229113
COMMD1	15.2846	37.6307	1.2873	0.019	UP	No	No	1	COMMD1_exon_chr2:62362965	1	1	0	NA	1	1	1	1	NA	COMMD1_exon_chr2:62362965
BMP6	2.4262	6.0745	1.2866	1	NC	No	No	1	BMP6_exon_chr6:7880426	1	1	0	NA	2	NA	NA	NA	NA	BMP6_exon_chr6:7880426
LOC102724156	1.9405	4.3868	1.2842	1	NC	No	No	1	LOC102724156_exon_chr9:90681696	1	1	0	NA	1	1	1	1	NA	LOC102724156_exon_chr9:90681696
SNX13	34.0509	82.9106	1.282	0.0011	UP	No	Yes	1	SNX13_exon_chr7:17833916	1	1	0	NA	4	0.4756	0.1744	-0.3011	Both	SNX13_exon_chr7:17833916
MANEA	7.8115	18.6567	1.2819	0.1354	NC	No	Yes	1	MANEA_exon_chr6:96053623	1	1	0	NA	5	NA	NA	NA	Both	MANEA_exon_chr6:96053623
ZNF227	50.5564	121.848	1.2816	0.0003	UP	No	Yes	1	ZNF227_exon_chr19:44738854	1	1	0	NA	2	0.6708	0.3043	-0.3665	Shortening	ZNF227_exon_chr19:44738854
HEATR5B	3.6516	9.1577	1.2778	0.3047	NC	No	No	1	HEATR5B_exon_chr2:37208937	1	1	0	NA	1	1	1	1	NA	HEATR5B_exon_chr2:37208937
CYP4F11	5.7255	13.9894	1.2769	0.3475	NC	No	No	1	CYP4F11_exon_chr19:16024719	1	1	0	NA	5	NA	NA	NA	NA	CYP4F11_exon_chr19:16024719
ABHD4	7.3253	17.0497	1.2754	0.3359	NC	No	No	1	ABHD4_exon_chr14:23079764	1	1	0	NA	1	1	1	1	NA	ABHD4_exon_chr14:23079764
GALK2	10.1904	25.1814	1.2749	0.0649	UP	No	No	1	GALK2_exon_chr15:49620148	1	1	0	NA	1	1	1	1	NA	GALK2_exon_chr15:49620148
FAAH2	3.1536	7.4442	1.2744	0.5515	NC	No	No	1	FAAH2_exon_chrX:57515189	1	1	0	NA	1	1	1	1	NA	FAAH2_exon_chrX:57515189
CHCHD7	96.6432	233.677	1.2741	0	UP	No	Yes	1	CHCHD7_exon_chr8:57129889	1	1	0	NA	2	0.2047	0.0254	-0.1793	Shortening	CHCHD7_exon_chr8:57129889
GS1-124K5.11	19.0097	46.334	1.2729	0.0279	UP	No	Yes	1	GS1-124K5.11_exon_chr7:66019824	1	1	0	NA	2	0.5536	0.2819	-0.2718	Shortening	GS1-124K5.11_exon_chr7:66019824
MIA	0.2548	0.838	1.2695	1	NC	No	No	1	MIA_exon_chr19:41283301	1	1	0	NA	1	1	1	1	NA	MIA_exon_chr19:41283301
SKA1	27.8532	68.1633	1.2685	0.0008	UP	No	Yes	1	SKA1_exon_chr18:47918468	1	1	0	NA	3	0.8079	0.4729	-0.3349	Shortening	SKA1_exon_chr18:47918468
PARVB	5.6526	13.4086	1.2663	0.2755	NC	No	No	1	PARVB_exon_chr22:44564481	1	1	0	NA	1	1	1	1	NA	PARVB_exon_chr22:44564481
ZNF697	8.9032	21.3297	1.265	0.1706	NC	No	Yes	1	ZNF697_exon_chr1:120166739	1	1	0	NA	3	NA	NA	NA	Shortening	ZNF697_exon_chr1:120166739
SAMD14	0.6429	1.5518	1.264	1	NC	No	No	1	SAMD14_exon_chr17:48190412	1	1	0	NA	2	NA	NA	NA	NA	SAMD14_exon_chr17:48190412
XPR1	43.0258	102.589	1.2633	0	UP	No	Yes	1	XPR1_exon_chr1:180853141	1	1	0	NA	7	0.7848	0.2976	-0.4872	Both	XPR1_exon_chr1:180853141
JDP2	29.913	71.549	1.2616	0.0372	UP	No	No	1	JDP2_exon_chr14:75935992	1	1	0	NA	5	0.5068	0.6182	0.1114	NA	JDP2_exon_chr14:75935992
ADRB1	2.1953	4.8806	1.2596	0.6885	NC	No	No	1	ADRB1_exon_chr10:115803624	1	1	0	NA	2	NA	NA	NA	NA	ADRB1_exon_chr10:115803624
BRIP1	21.4949	51.0878	1.2571	0.0124	UP	No	Yes	1	BRIP1_exon_chr17:59761501	1	1	0	NA	2	0.8238	0.3046	-0.5192	Shortening	BRIP1_exon_chr17:59761501
PRKD3	45.8527	109.872	1.257	0.0002	UP	No	Yes	1	PRKD3_exon_chr2:37480493	1	1	0	NA	3	0.5144	0.0361	-0.4782	Shortening	PRKD3_exon_chr2:37480493
MXD1	13.8401	32.8336	1.2569	0.0382	UP	No	Yes	2	MXD1_exon_chr2:70143252_x000D_ MXD1_exon_chr2:70165228	0.2199_x000D_ 0.7801	0.3563_x000D_ 0.6437	0.1364_x000D_ -0.1364	NA_x000D_ NA	3_x000D_ 1	NA_x000D_ 1.0	NA_x000D_ 1.0	NA_x000D_ 1.0	Shortening_x000D_ NA	MXD1_exon_chr2:70143252	MXD1_exon_chr2:70165228
AS3MT	1.4075	3.5833	1.2563	1	NC	No	No	1	AS3MT_exon_chr10:104660349	1	1	0	NA	1	1	1	1	NA	AS3MT_exon_chr10:104660349
CSPG4	16.534	39.3528	1.2558	0.0328	UP	No	Yes	1	CSPG4_exon_chr15:75969725	1	1	0	NA	2	NA	NA	NA	Shortening	CSPG4_exon_chr15:75969725
UFSP1	0.7645	2.0893	1.2554	1	NC	No	No	1	UFSP1_exon_chr7:100487336	1	1	0	NA	1	1	1	1	NA	UFSP1_exon_chr7:100487336
SS18	144.778	345.166	1.2548	0	UP	No	Yes	1	SS18_exon_chr18:23598344	1	1	0	NA	10	0.7701	0.1666	-0.6035	Shortening	SS18_exon_chr18:23598344
NIPAL3	43.5238	104.294	1.2547	0.0004	UP	Yes	No	2	NIPAL3_exon_chr1:24792493_x000D_ NIPAL3_exon_chr1:24795475	0.7529_x000D_ 0.2471	0.8853_x000D_ 0.1005	0.1324_x000D_ -0.1466	Up_x000D_ NA	1_x000D_ 4	1.0_x000D_ NA	1.0_x000D_ NA	1.0_x000D_ NA	NA_x000D_ NA	NIPAL3_exon_chr1:24792493	NIPAL3_exon_chr1:24795475
SMIM22	3.2147	7.6695	1.2545	1	NC	No	No	1	SMIM22_exon_chr16:4846190	1	1	0	NA	1	1	1	1	NA	SMIM22_exon_chr16:4846190
B3GNTL1	30.6763	72.4791	1.2526	0.002	UP	No	Yes	1	B3GNTL1_exon_chr17:80901925	1	1	0	NA	2	0.2898	0.1275	-0.1623	Shortening	B3GNTL1_exon_chr17:80901925
CLMN	12.3369	29.146	1.2501	0.0612	UP	No	Yes	2	CLMN_exon_chr14:95658069_x000D_ CLMN_exon_chr14:95663031	0.7709_x000D_ 0.2291	0.7921_x000D_ 0.2079	0.0212_x000D_ -0.0212	NA_x000D_ NA	3_x000D_ 1	NA_x000D_ 1.0	NA_x000D_ 1.0	NA_x000D_ 1.0	Shortening_x000D_ NA	CLMN_exon_chr14:95658069	CLMN_exon_chr14:95663031
FGF2	5.7385	14.0383	1.2492	0.1863	NC	No	Yes	1	FGF2_exon_chr4:123813365	1	1	0	NA	4	NA	NA	NA	Shortening	FGF2_exon_chr4:123813365
LINS1	18.2335	43.9217	1.2472	0.0368	UP	No	No	2	LINS1_exon_chr15:101110322_x000D_ LINS1_exon_chr15:101113505	0.4522_x000D_ 0.5478	0.3353_x000D_ 0.6647	-0.1169_x000D_ 0.1169	NA_x000D_ NA	2_x000D_ 2	NA_x000D_ NA	NA_x000D_ NA	NA_x000D_ NA	NA_x000D_ NA	LINS1_exon_chr15:101110322	LINS1_exon_chr15:101113505
CD55	50.3291	119.557	1.2448	0.0001	UP	No	Yes	1	CD55_exon_chr1:207532890	1	1	0	NA	2	0.9374	0.1347	-0.8027	Shortening	CD55_exon_chr1:207532890
SKIDA1	0.3881	0.8062	1.2443	1	NC	No	No	1	SKIDA1_exon_chr10:21808587	1	1	0	NA	1	1	1	1	NA	SKIDA1_exon_chr10:21808587
RHOU	5.8099	13.5387	1.2441	0.3623	NC	No	Yes	1	RHOU_exon_chr1:228879031	1	1	0	NA	2	NA	NA	NA	Shortening	RHOU_exon_chr1:228879031
PLS1	38.0905	91.1641	1.2436	0.0007	UP	No	Yes	2	PLS1_exon_chr3:142389834_x000D_ PLS1_exon_chr3:142430713	0.1947_x000D_ 0.8053	0.1137_x000D_ 0.8863	-0.081_x000D_ 0.081	NA_x000D_ NA	1_x000D_ 5	1.0_x000D_ 0.8836	1.0_x000D_ 0.1896	1.0_x000D_ -0.694	NA_x000D_ Both	PLS1_exon_chr3:142389834	PLS1_exon_chr3:142430713
TSPAN31	44.9297	105.627	1.2436	0.0005	UP	No	No	1	TSPAN31_exon_chr12:58140998	1	1	0	NA	1	1	1	1	NA	TSPAN31_exon_chr12:58140998
ORMDL2	97.7735	231.71	1.2417	0	UP	No	No	1	ORMDL2_exon_chr12:56214043	1	1	0	NA	1	1	1	1	NA	ORMDL2_exon_chr12:56214043
LOC100132287	21.8845	52.2732	1.2415	0.0201	UP	No	No	2	LOC100132287_exon_chr1:324438_x000D_ LOC100132287_exon_chr5:180751053	0.4391_x000D_ 0.5609	0.4718_x000D_ 0.5282	0.0327_x000D_ -0.0327	NA_x000D_ NA	1_x000D_ 1	1.0_x000D_ 1.0	1.0_x000D_ 1.0	1.0_x000D_ 1.0	NA_x000D_ NA	LOC100132287_exon_chr1:324438	LOC100132287_exon_chr5:180751053
GFOD1	13.5859	31.9865	1.241	0.0506	UP	No	Yes	1	GFOD1_exon_chr6:13365894	1	1	0	NA	2	0.5342	0.0957	-0.4386	Shortening	GFOD1_exon_chr6:13365894
DCAF5	70.8151	166.155	1.241	0	UP	No	No	1	DCAF5_exon_chr14:69522328	1	1	0	NA	4	0.1219	0.0287	-0.0932	NA	DCAF5_exon_chr14:69522328
KCNC4	2.9476	6.9007	1.2393	0.5874	NC	No	No	1	KCNC4_exon_chr1:110774842	1	1	0	NA	1	1	1	1	NA	KCNC4_exon_chr1:110774842
OCEL1	7.8968	18.5324	1.2376	0.1762	NC	No	No	1	OCEL1_exon_chr19:17339611	1	1	0	NA	1	1	1	1	NA	OCEL1_exon_chr19:17339611
ZNF354B	0.7645	1.9247	1.2372	1	NC	No	No	1	ZNF354B_exon_chr5:178309709	1	1	0	NA	1	1	1	1	NA	ZNF354B_exon_chr5:178309709
BOC	0.7762	1.7714	1.237	1	NC	No	No	1	BOC_exon_chr3:113005521	1	1	0	NA	1	1	1	1	NA	BOC_exon_chr3:113005521
ZNF804A	1.0194	2.4908	1.2335	1	NC	No	No	1	ZNF804A_exon_chr2:185800509	1	1	0	NA	1	1	1	1	NA	ZNF804A_exon_chr2:185800509
LOC100996720	3.8213	8.9987	1.2334	0.3881	NC	No	No	1	LOC100996720_exon_chr1:144339861	1	1	0	NA	1	1	1	1	NA	LOC100996720_exon_chr1:144339861
NUPR1	6.3917	14.799	1.2324	0.632	NC	No	No	1	NUPR1_exon_chr16:28548990	1	1	0	NA	1	1	1	1	NA	NUPR1_exon_chr16:28548990
ERV3-1-ZNF117	3.7128	9.1551	1.2294	0.5903	NC	No	No	1	ERV3-1-ZNF117_exon_chr7:64439914	1	1	0	NA	4	NA	NA	NA	NA	ERV3-1-ZNF117_exon_chr7:64439914
CD163L1	58.3486	137.082	1.2293	0	UP	No	No	1	CD163L1_exon_chr12:7507726	1	1	0	NA	1	1	1	1	NA	CD163L1_exon_chr12:7507726
PNPLA5	4.5619	11.2034	1.229	0.436	NC	No	No	1	PNPLA5_exon_chr22:44276765	1	1	0	NA	2	NA	NA	NA	NA	PNPLA5_exon_chr22:44276765
BATF2	2.9476	6.8544	1.2288	1	NC	No	No	1	BATF2_exon_chr11:64757284	1	1	0	NA	1	1	1	1	NA	BATF2_exon_chr11:64757284
ANKRD28	31.0076	74.2383	1.2275	0.0007	UP	No	Yes	1	ANKRD28_exon_chr3:15712063	1	1	0	NA	6	0.6158	0.2626	-0.3532	Both	ANKRD28_exon_chr3:15712063
CASP4	29.4782	69.4297	1.2248	0.001	UP	No	No	2	CASP4_exon_chr11:104813700_x000D_ CASP4_exon_chr11:104825728	0.6321_x000D_ 0.3679	0.6123_x000D_ 0.3877	-0.0198_x000D_ 0.0198	NA_x000D_ NA	1_x000D_ 1	1.0_x000D_ 1.0	1.0_x000D_ 1.0	1.0_x000D_ 1.0	NA_x000D_ NA	CASP4_exon_chr11:104813700	CASP4_exon_chr11:104825728
EN2	0.7034	1.6328	1.2235	1	NC	No	No	1	EN2_exon_chr7:155255065	1	1	0	NA	1	1	1	1	NA	EN2_exon_chr7:155255065
ECD	182.482	427.951	1.2232	0	UP	No	No	2	ECD_exon_chr10:74894571_x000D_ ECD_exon_chr10:74927853	0.8837_x000D_ 0.1163	0.9308_x000D_ 0.0692	0.0471_x000D_ -0.0471	NA_x000D_ NA	1_x000D_ 1	1.0_x000D_ 1.0	1.0_x000D_ 1.0	1.0_x000D_ 1.0	NA_x000D_ NA	ECD_exon_chr10:74894571	ECD_exon_chr10:74927853
NME5	2.3169	5.2852	1.2231	0.5852	NC	No	No	1	NME5_exon_chr5:137451453	1	1	0	NA	2	NA	NA	NA	NA	NME5_exon_chr5:137451453
FGFBP1	17.3845	41.2167	1.2182	0.0561	UP	No	No	1	FGFBP1_exon_chr4:15938275	1	1	0	NA	1	1	1	1	NA	FGFBP1_exon_chr4:15938275
MORN1	0.3517	0.8062	1.2181	1	NC	No	No	1	MORN1_exon_chr1:2253018	1	1	0	NA	1	1	1	1	NA	MORN1_exon_chr1:2253018
KIAA0586	23.8853	55.4924	1.2162	0.0065	UP	Yes	No	2	KIAA0586_exon_chr14:58926560_x000D_ KIAA0586_exon_chr14:59014498	0.3391_x000D_ 0.6609	0.218_x000D_ 0.782	-0.1211_x000D_ 0.1211	NA_x000D_ Up	4_x000D_ 1	0.1661_x000D_ 1.0	0.1526_x000D_ 1.0	NA_x000D_ 1.0	NA_x000D_ NA	KIAA0586_exon_chr14:58926560	KIAA0586_exon_chr14:59014498
LINC02036	1.031	2.3871	1.2148	1	NC	No	No	1	LINC02036_exon_chr3:193921468	1	1	0	NA	1	1	1	1	NA	LINC02036_exon_chr3:193921468
FCSK	4.3187	10.2413	1.2148	0.3254	NC	No	No	1	FCSK_exon_chr16:70513481	1	1	0	NA	1	1	1	1	NA	FCSK_exon_chr16:70513481
SAXO2	0.3881	0.8062	1.2142	1	NC	No	No	1	SAXO2_exon_chr15:82557013	1	1	0	NA	1	1	1	1	NA	SAXO2_exon_chr15:82557013
FAM214B	18.9505	44.3527	1.2142	0.2849	NC	No	No	1	FAM214B_exon_chr9:35105371	1	1	0	NA	1	1	1	1	NA	FAM214B_exon_chr9:35105371
TFPI	68.1209	157.007	1.2142	0.0003	UP	No	Yes	1	TFPI_exon_chr2:188331769	1	1	0	NA	3	0.7825	0.1094	-0.6731	Shortening	TFPI_exon_chr2:188331769
RELL2	1.5291	3.8925	1.2141	1	NC	No	No	1	RELL2_exon_chr5:141020237	1	1	0	NA	1	1	1	1	NA	RELL2_exon_chr5:141020237
LRATD2	33.2013	76.8066	1.2139	0.0011	UP	No	Yes	1	LRATD2_exon_chr8:127569730	1	1	0	NA	3	0.8052	0.363	-0.4422	Both	LRATD2_exon_chr8:127569730
CEMIP2	34.2334	79.8457	1.2138	0.0024	UP	No	Yes	1	CEMIP2_exon_chr9:74300309	1	1	0	NA	4	0.4295	0.297	-0.1325	Shortening	CEMIP2_exon_chr9:74300309
MAP1LC3B	237.858	552.324	1.2129	0	UP	No	Yes	1	MAP1LC3B_exon_chr16:87436528	1	1	0	NA	3	0.4029	0.0554	-0.3475	Shortening	MAP1LC3B_exon_chr16:87436528
IFI6	25.813	59.7032	1.2116	0.0257	UP	No	No	1	IFI6_exon_chr1:27992986	1	1	0	NA	1	1	1	1	NA	IFI6_exon_chr1:27992986
FLJ46875	5.4109	12.9634	1.211	0.2904	NC	No	No	1	FLJ46875_exon_chr2:157198632	1	1	0	NA	1	1	1	1	NA	FLJ46875_exon_chr2:157198632
TRMO	9.2197	21.5206	1.2099	0.175	NC	No	No	1	TRMO_exon_chr9:100667274	1	1	0	NA	2	NA	NA	NA	NA	TRMO_exon_chr9:100667274
BTN3A1	2.6563	6.0627	1.2085	0.5798	NC	No	No	1	BTN3A1_exon_chr6:26412639	1	1	0	NA	2	NA	NA	NA	NA	BTN3A1_exon_chr6:26412639
FOXN3-AS1	4.1482	9.3543	1.2082	0.3809	NC	No	No	1	FOXN3-AS1_exon_chr14:89885503	1	1	0	NA	1	1	1	1	NA	FOXN3-AS1_exon_chr14:89885503
LOC105377102	2.8755	6.8744	1.2078	1	NC	No	No	1	LOC105377102_exon_chr3:57311820	1	1	0	NA	1	1	1	1	NA	LOC105377102_exon_chr3:57311820
B3GLCT	7.096	16.2399	1.2067	0.2067	NC	No	Yes	1	B3GLCT_exon_chr13:31903637	1	1	0	NA	4	NA	NA	NA	Shortening	B3GLCT_exon_chr13:31903637
GPAT3	43.1641	100.672	1.2054	0.0067	UP	No	No	1	GPAT3_exon_chr4:84525820	1	1	0	NA	1	1	1	1	NA	GPAT3_exon_chr4:84525820
STAM2	25.7538	59.4241	1.2052	0.0059	UP	No	Yes	1	STAM2_exon_chr2:152977316	1	1	0	NA	5	0.4445	0.0696	NA	Both	STAM2_exon_chr2:152977316
H3P6	293.326	673.301	1.2003	0	UP	No	Yes	1	H3P6_exon_chr2:175584527	1	1	0	NA	3	0.5645	0.3753	-0.1892	Shortening	H3P6_exon_chr2:175584527
GOLM1	222.193	510.647	1.1989	0	UP	No	Yes	1	GOLM1_exon_chr9:88642808	1	1	0	NA	3	0.6717	0.1739	-0.4977	Shortening	GOLM1_exon_chr9:88642808
RGS4	1.4191	3.1355	1.1986	1	NC	No	No	1	RGS4_exon_chr1:163044110	1	1	0	NA	2	NA	NA	NA	NA	RGS4_exon_chr1:163044110
ATP1B1	64.7769	148.232	1.197	0	UP	No	Yes	1	ATP1B1_exon_chr1:169100529	1	1	0	NA	5	0.8052	0.7124	-0.0928	Both	ATP1B1_exon_chr1:169100529
HBEGF	8.1757	18.7027	1.1968	0.247	NC	No	Yes	1	HBEGF_exon_chr5:139713865	1	1	0	NA	2	NA	NA	NA	Shortening	HBEGF_exon_chr5:139713865
H4C3	1.7586	3.8693	1.1965	1	NC	No	No	1	H4C3_exon_chr6:26104160	1	1	0	NA	1	1	1	1	NA	H4C3_exon_chr6:26104160
PRR4	3.7128	8.9582	1.1961	0.4967	NC	No	No	1	PRR4_exon_chr12:10998549	1	1	0	NA	1	1	1	1	NA	PRR4_exon_chr12:10998549
DERL1	164.602	377.797	1.1943	0	UP	No	Yes	1	DERL1_exon_chr8:124027825	1	1	0	NA	6	0.343	0.0946	-0.2484	Shortening	DERL1_exon_chr8:124027825
IQCD	8.4187	19.2982	1.1941	0.2637	NC	No	No	2	IQCD_exon_chr12:113633694_x000D_ IQCD_exon_chr12:113646064	0.8619_x000D_ 0.1381	0.9846_x000D_ 0.0154	0.1227_x000D_ -0.1227	NA_x000D_ NA	1_x000D_ 1	1.0_x000D_ 1.0	1.0_x000D_ 1.0	1.0_x000D_ 1.0	NA_x000D_ NA	IQCD_exon_chr12:113633694	IQCD_exon_chr12:113646064
RNFT1-DT	1.5407	3.5775	1.194	1	NC	No	No	1	RNFT1-DT_exon_chr17:58050195	1	1	0	NA	1	1	1	1	NA	RNFT1-DT_exon_chr17:58050195
WDR41	59.0985	134.641	1.1939	0.0001	UP	No	Yes	1	WDR41_exon_chr5:76729112	1	1	0	NA	7	0.4287	0.19	-0.2387	Shortening	WDR41_exon_chr5:76729112
HHLA3	8.8798	20.5204	1.1928	0.1266	NC	No	No	1	HHLA3_exon_chr1:70833299	1	1	0	NA	1	1	1	1	NA	HHLA3_exon_chr1:70833299
CIRBP-AS1	2.1109	4.9792	1.1921	0.6761	NC	No	No	1	CIRBP-AS1_exon_chr19:1268389	1	1	0	NA	1	1	1	1	NA	CIRBP-AS1_exon_chr19:1268389
MIR4657	35.7016	81.8517	1.192	0.0012	UP	No	Yes	1	MIR4657_exon_chr7:44925129	1	1	0	NA	4	0.7891	0.2787	-0.5104	Shortening	MIR4657_exon_chr7:44925129
TMEM44-AS1	2.6927	6.1497	1.1918	0.6865	NC	No	No	1	TMEM44-AS1_exon_chr3:194310583	1	1	0	NA	1	1	1	1	NA	TMEM44-AS1_exon_chr3:194310583
ACSL4	83.7486	191.557	1.191	0	UP	No	Yes	1	ACSL4_exon_chrX:108887415	1	1	0	NA	6	0.9312	0.3052	-0.626	Both	ACSL4_exon_chrX:108887415
HACD2	61.4758	139.974	1.1907	0	UP	No	Yes	1	HACD2_exon_chr3:123213817	1	1	0	NA	7	0.9721	0.3303	-0.6418	Shortening	HACD2_exon_chr3:123213817
TTC39C	18.4154	42.5294	1.1898	0.0662	UP	Yes	Yes	2	TTC39C_exon_chr18:21599823_x000D_ TTC39C_exon_chr18:21712448	0.5798_x000D_ 0.4202	0.3555_x000D_ 0.6445	-0.2243_x000D_ 0.2243	NA_x000D_ Up	1_x000D_ 5	1.0_x000D_ NA	1.0_x000D_ NA	1.0_x000D_ NA	NA_x000D_ Shortening	TTC39C_exon_chr18:21599823	TTC39C_exon_chr18:21712448
YTHDF3-AS1	0.7645	1.9652	1.1889	1	NC	No	No	1	YTHDF3-AS1_exon_chr8:64081001	1	1	0	NA	1	1	1	1	NA	YTHDF3-AS1_exon_chr8:64081001
SETDB2	5.3373	11.8854	1.1882	0.2997	NC	No	No	1	SETDB2_exon_chr13:50065867	1	1	0	NA	2	NA	NA	NA	NA	SETDB2_exon_chr13:50065867
CUL4B	91.5025	209.161	1.1881	0.0001	UP	No	Yes	1	CUL4B_exon_chrX:119660711	1	1	0	NA	7	0.6105	0.1202	-0.4903	Shortening	CUL4B_exon_chrX:119660711
THSD1	1.674	3.7684	1.1859	1	NC	No	No	1	THSD1_exon_chr13:52952924	1	1	0	NA	1	1	1	1	NA	THSD1_exon_chr13:52952924
LINC01006	0.6429	1.439	1.1848	1	NC	No	No	1	LINC01006_exon_chr7:156433229	1	1	0	NA	1	1	1	1	NA	LINC01006_exon_chr7:156433229
KLF4	34.2196	77.778	1.1848	0.0054	UP	No	Yes	1	KLF4_exon_chr9:110248207	1	1	0	NA	3	0.9635	0.6883	-0.2752	Both	KLF4_exon_chr9:110248207
CLIC4	169.629	385.045	1.1833	0	UP	No	Yes	1	CLIC4_exon_chr1:25167263	1	1	0	NA	10	0.8154	0.3378	-0.4776	Shortening	CLIC4_exon_chr1:25167263
TMEM234	8.7465	20.0634	1.1828	0.1749	NC	No	No	1	TMEM234_exon_chr1:32682548	1	1	0	NA	1	1	1	1	NA	TMEM234_exon_chr1:32682548
LOC105377590	2.9715	6.3951	1.1817	0.7029	NC	No	No	1	LOC105377590_exon_chr4:186393268	1	1	0	NA	1	1	1	1	NA	LOC105377590_exon_chr4:186393268
DLGAP1-AS1	26.0909	58.3713	1.1807	0.0185	UP	No	Yes	1	DLGAP1-AS1_exon_chr18:3596576	1	1	0	NA	2	0.7706	0.5184	-0.2521	Shortening	DLGAP1-AS1_exon_chr18:3596576
CREB1	25.4119	57.0727	1.1804	0.0062	UP	No	Yes	1	CREB1_exon_chr2:208461637	1	1	0	NA	5	0.4781	0.1176	-0.3605	Both	CREB1_exon_chr2:208461637
FGGY	2.3053	5.5021	1.1798	0.699	NC	No	No	1	FGGY_exon_chr1:60228174	1	1	0	NA	1	1	1	1	NA	FGGY_exon_chr1:60228174
ZNF100	17.1777	39.3843	1.1795	0.0204	UP	No	Yes	1	ZNF100_exon_chr19:21910791	1	1	0	NA	7	0.4324	0.1985	-0.2338	Both	ZNF100_exon_chr19:21910791
ZNF586	3.2993	7.5369	1.1791	0.5645	NC	No	No	1	ZNF586_exon_chr19:58290118	1	1	0	NA	2	NA	NA	NA	NA	ZNF586_exon_chr19:58290118
PTPRM	6.005	13.7265	1.1785	0.2419	NC	No	No	1	PTPRM_exon_chr18:8406106	1	1	0	NA	2	NA	NA	NA	NA	PTPRM_exon_chr18:8406106
ACBD4	3.7842	8.3689	1.1765	0.4511	NC	No	No	1	ACBD4_exon_chr17:43219949	1	1	0	NA	1	1	1	1	NA	ACBD4_exon_chr17:43219949
EPHX4	3.8818	8.7559	1.1764	0.5281	NC	No	No	1	EPHX4_exon_chr1:92528611	1	1	0	NA	2	NA	NA	NA	NA	EPHX4_exon_chr1:92528611
GBP2	1.0551	2.2452	1.1761	1	NC	No	No	1	GBP2_exon_chr1:89573974	1	1	0	NA	1	1	1	1	NA	GBP2_exon_chr1:89573974
RNF152	1.1643	2.5836	1.1753	1	NC	No	No	1	RNF152_exon_chr18:59483831	1	1	0	NA	1	1	1	1	NA	RNF152_exon_chr18:59483831
ALOX12P2	1.7839	4.4878	1.173	1	NC	No	No	1	ALOX12P2_exon_chr17:6803186	1	1	0	NA	1	1	1	1	NA	ALOX12P2_exon_chr17:6803186
GORAB	6.1253	13.556	1.172	0.3414	NC	No	Yes	1	GORAB_exon_chr1:170521155	1	1	0	NA	2	NA	NA	NA	Shortening	GORAB_exon_chr1:170521155
AKAP11	55.4103	123.201	1.1719	0.0001	UP	No	Yes	1	AKAP11_exon_chr13:42893223	1	1	0	NA	4	0.7883	0.1151	-0.6731	Shortening	AKAP11_exon_chr13:42893223
CERS1	1.5044	3.4938	1.1711	1	NC	No	No	1	CERS1_exon_chr19:18989848	1	1	0	NA	1	1	1	1	NA	CERS1_exon_chr19:18989848
PYROXD2	1.5524	3.2914	1.1705	1	NC	No	No	1	PYROXD2_exon_chr10:100143625	1	1	0	NA	1	1	1	1	NA	PYROXD2_exon_chr10:100143625
SAMD5	4.961	11.007	1.1698	0.3534	NC	No	No	1	SAMD5_exon_chr6:147885529	1	1	0	NA	4	NA	NA	NA	NA	SAMD5_exon_chr6:147885529
ZNF446	2.1953	4.7191	1.1683	1	NC	No	No	1	ZNF446_exon_chr19:58991542	1	1	0	NA	1	1	1	1	NA	ZNF446_exon_chr19:58991542
KYAT1	2.705	6.0109	1.1682	1	NC	No	No	1	KYAT1_exon_chr9:131595922	1	1	0	NA	2	NA	NA	NA	NA	KYAT1_exon_chr9:131595922
PRRT3	3.348	7.4355	1.1671	1	NC	No	No	1	PRRT3_exon_chr3:9989685	1	1	0	NA	1	1	1	1	NA	PRRT3_exon_chr3:9989685
ISCA1	53.9466	122.384	1.1667	0.0002	UP	No	Yes	1	ISCA1_exon_chr9:88881106	1	1	0	NA	3	0.4117	0.1243	-0.2874	Both	ISCA1_exon_chr9:88881106
ULBP1	13.0633	29.1349	1.1664	0.2121	NC	No	No	1	ULBP1_exon_chr6:150292504	1	1	0	NA	2	NA	NA	NA	NA	ULBP1_exon_chr6:150292504
H3-3B	3281.37	7364.97	1.1661	0	UP	No	Yes	1	H3-3B_exon_chr17:73774804	1	1	0	NA	10	0.5161	0.1541	-0.3619	Shortening	H3-3B_exon_chr17:73774804
TTC28-AS1	34.2812	77.3369	1.1644	0.0009	UP	Yes	Yes	2	TTC28-AS1_exon_chr22:28318005_x000D_ TTC28-AS1_exon_chr22:28320334	0.1949_x000D_ 0.7564	0.3625_x000D_ 0.6039	0.1677_x000D_ -0.1524	Up_x000D_ Down	3_x000D_ 2	0.6459_x000D_ NA	0.5117_x000D_ NA	-0.1342_x000D_ NA	Shortening_x000D_ NA	TTC28-AS1_exon_chr22:28318005	TTC28-AS1_exon_chr22:28320334
ZNF37BP	5.1793	11.186	1.1601	0.4047	NC	No	Yes	1	ZNF37BP_exon_chr10:43016575	1	1	0	NA	4	NA	NA	NA	Shortening	ZNF37BP_exon_chr10:43016575
COL9A2	2.2194	4.7451	1.16	1	NC	No	No	1	COL9A2_exon_chr1:40767053	1	1	0	NA	1	1	1	1	NA	COL9A2_exon_chr1:40767053
SNHG21	8.0423	17.8158	1.1598	0.3504	NC	No	Yes	1	SNHG21_exon_chr15:83425655	1	1	0	NA	2	NA	NA	NA	Shortening	SNHG21_exon_chr15:83425655
GREB1	1.3827	2.9909	1.1595	1	NC	No	No	1	GREB1_exon_chr2:11780416	1	1	0	NA	1	1	1	1	NA	GREB1_exon_chr2:11780416
IRS1	74.5407	166.757	1.1591	0.0012	UP	No	Yes	1	IRS1_exon_chr2:227600966	1	1	0	NA	8	0.2957	0.0998	-0.1959	Both	IRS1_exon_chr2:227600966
RUNX1	36.0396	80.278	1.1587	0.0083	UP	No	Yes	1	RUNX1_exon_chr21:36164907	1	1	0	NA	4	0.4734	0.0844	-0.3889	Shortening	RUNX1_exon_chr21:36164907
IFNAR1	58.4357	131.138	1.1583	0.0025	UP	No	Yes	2	IFNAR1_exon_chr21:34721694_x000D_ IFNAR1_exon_chr21:34727621	0.0925_x000D_ 0.9075	0.0648_x000D_ 0.9352	-0.0277_x000D_ 0.0277	NA_x000D_ NA	1_x000D_ 7	1.0_x000D_ 0.2135	1.0_x000D_ 0.0986	1.0_x000D_ -0.1149	NA_x000D_ Shortening	IFNAR1_exon_chr21:34721694	IFNAR1_exon_chr21:34727621
FOXL1	2.0504	4.7365	1.1562	1	NC	No	No	1	FOXL1_exon_chr16:86612154	1	1	0	NA	2	NA	NA	NA	NA	FOXL1_exon_chr16:86612154
CLN8	21.7396	49.4675	1.1556	0.0266	UP	No	Yes	1	CLN8_exon_chr8:1728415	1	1	0	NA	6	0.6042	0.098	-0.5062	Both	CLN8_exon_chr8:1728415
PLEKHA2	18.0009	39.9082	1.1549	0.4652	NC	No	No	1	PLEKHA2_exon_chr8:38827186	1	1	0	NA	1	1	1	1	NA	PLEKHA2_exon_chr8:38827186
H2BC20P	1.5044	3.3837	1.1536	1	NC	No	No	1	H2BC20P_exon_chr1:149822340	1	1	0	NA	1	1	1	1	NA	H2BC20P_exon_chr1:149822340
ZNF597	3.2031	7.4063	1.1518	0.5894	NC	No	No	1	ZNF597_exon_chr16:3487538	1	1	0	NA	3	NA	NA	NA	NA	ZNF597_exon_chr16:3487538
FKBP7	1.4191	2.9909	1.1517	1	NC	No	No	1	FKBP7_exon_chr2:179330658	1	1	0	NA	1	1	1	1	NA	FKBP7_exon_chr2:179330658
AGTPBP1	19.5661	43.2192	1.1514	0.0123	UP	No	Yes	1	AGTPBP1_exon_chr9:88162201	1	1	0	NA	2	0.7707	0.1205	-0.6502	Shortening	AGTPBP1_exon_chr9:88162201
ANKRD34A	1.3464	2.9272	1.1509	1	NC	No	No	1	ANKRD34A_exon_chr1:145473208	1	1	0	NA	1	1	1	1	NA	ANKRD34A_exon_chr1:145473208
ZNF204P	18.3173	40.8976	1.1495	0.1717	NC	No	Yes	1	ZNF204P_exon_chr6:27328000	1	1	0	NA	3	0.5221	0.4673	-0.0548	Both	ZNF204P_exon_chr6:27328000
SYBU	22.5273	49.9691	1.1482	0.0245	UP	No	Yes	1	SYBU_exon_chr8:110588242	1	1	0	NA	3	0.6274	0.4076	-0.2199	Shortening	SYBU_exon_chr8:110588242
FAM227A	9.9472	22.0604	1.1478	0.1522	NC	No	No	1	FAM227A_exon_chr22:38982204	1	1	0	NA	1	1	1	1	NA	FAM227A_exon_chr22:38982204
MAGIX	0.8978	2.0488	1.1462	1	NC	No	No	1	MAGIX_exon_chrX:49022412	1	1	0	NA	2	NA	NA	NA	NA	MAGIX_exon_chrX:49022412
ATG12	195.158	432.421	1.1451	0	UP	No	Yes	2	ATG12_exon_chr5:115167560_x000D_ ATG12_exon_chr5:115177262	0.9082_x000D_ 0.0918	0.8764_x000D_ 0.1236	-0.0318_x000D_ 0.0318	NA_x000D_ NA	1_x000D_ 13	1.0_x000D_ 0.3487	1.0_x000D_ 0.1002	1.0_x000D_ -0.2485	NA_x000D_ Shortening	ATG12_exon_chr5:115167560	ATG12_exon_chr5:115177262
MDGA1	1.674	3.6498	1.145	1	NC	No	No	1	MDGA1_exon_chr6:37605235	1	1	0	NA	1	1	1	1	NA	MDGA1_exon_chr6:37605235
KLHL2	39.2579	87.6187	1.1447	0.0063	UP	No	Yes	1	KLHL2_exon_chr4:166243183	1	1	0	NA	5	0.8697	0.157	-0.7127	Shortening	KLHL2_exon_chr4:166243183
RRAS2	46.9719	104.574	1.1442	0.0008	UP	No	Yes	1	RRAS2_exon_chr11:14300970	1	1	0	NA	6	0.4832	0.2144	-0.2688	Both	RRAS2_exon_chr11:14300970
PRKAB2	17.2244	37.839	1.144	0.0581	UP	No	Yes	1	PRKAB2_exon_chr1:146631221	1	1	0	NA	4	0.9358	0.2766	-0.6592	Both	PRKAB2_exon_chr1:146631221
MIR612	186.468	411.742	1.1439	0.0866	UP	No	Yes	1	MIR612_exon_chr11:65190268	1	1	0	NA	11	0.2832	0.7673	0.4842	Lengthening	MIR612_exon_chr11:65190268
FAM98C	38.0391	83.0178	1.1428	0.0047	UP	No	No	1	FAM98C_exon_chr19:38899390	1	1	0	NA	1	1	1	1	NA	FAM98C_exon_chr19:38899390
PRRT4	2.5354	5.6872	1.1416	1	NC	No	No	1	PRRT4_exon_chr7:127992732	1	1	0	NA	1	1	1	1	NA	PRRT4_exon_chr7:127992732
MFGE8	224.198	492.352	1.1404	0	UP	No	No	1	MFGE8_exon_chr15:89442763	1	1	0	NA	1	1	1	1	NA	MFGE8_exon_chr15:89442763
ZNF551	2.5238	5.9673	1.1403	0.6093	NC	No	No	1	ZNF551_exon_chr19:58197848	1	1	0	NA	1	1	1	1	NA	ZNF551_exon_chr19:58197848
APOL2	25.803	57.8329	1.14	0.0218	UP	No	No	1	APOL2_exon_chr22:36624326	1	1	0	NA	4	0.2316	0.1703	NA	NA	APOL2_exon_chr22:36624326
WFDC3	3.9299	8.6666	1.1391	0.5859	NC	No	No	1	WFDC3_exon_chr20:44403083	1	1	0	NA	1	1	1	1	NA	WFDC3_exon_chr20:44403083
MIR7844	4.6455	9.6284	1.1391	0.3906	NC	No	No	1	MIR7844_exon_chr12:94965513	1	1	0	NA	4	NA	NA	NA	NA	MIR7844_exon_chr12:94965513
LOC100289230	0.7398	1.5432	1.1384	1	NC	No	No	1	LOC100289230_exon_chr5:98264837	1	1	0	NA	1	1	1	1	NA	LOC100289230_exon_chr5:98264837
NR1D1	30.3247	66.6131	1.1383	0.03	UP	No	Yes	1	NR1D1_exon_chr17:38249535	1	1	0	NA	3	0.6043	0.2246	-0.3797	Shortening	NR1D1_exon_chr17:38249535
LGALSL	45.8758	100.483	1.1378	0.0002	UP	No	Yes	1	LGALSL_exon_chr2:64685418	1	1	0	NA	3	0.5878	0.0653	-0.5225	Shortening	LGALSL_exon_chr2:64685418
ACY1	9.3646	20.3674	1.137	0.2736	NC	No	No	1	ACY1_exon_chr3:52022926	1	1	0	NA	1	1	1	1	NA	ACY1_exon_chr3:52022926
USP32	87.9932	193.489	1.1365	0	UP	No	Yes	1	USP32_exon_chr17:58256789	1	1	0	NA	4	0.3412	0.0276	-0.3136	Shortening	USP32_exon_chr17:58256789
FAM200A	6.6363	15.0327	1.136	0.2844	NC	No	Yes	1	FAM200A_exon_chr7:99146129	1	1	0	NA	2	NA	NA	NA	Shortening	FAM200A_exon_chr7:99146129
BTBD10	17.0678	37.6019	1.1354	0.023	UP	No	No	1	BTBD10_exon_chr11:13410688	1	1	0	NA	1	1	1	1	NA	BTBD10_exon_chr11:13410688
MPHOSPH9	16.2186	35.4864	1.1349	0.0657	UP	No	Yes	2	MPHOSPH9_exon_chr12:123641455_x000D_ MPHOSPH9_exon_chr12:123679148	0.8143_x000D_ 0.1857	0.8978_x000D_ 0.0193	0.0835_x000D_ -0.1665	NA_x000D_ NA	3_x000D_ 1	NA_x000D_ 1.0	NA_x000D_ 1.0	NA_x000D_ 1.0	Shortening_x000D_ NA	MPHOSPH9_exon_chr12:123641455	MPHOSPH9_exon_chr12:123679148
SMAD7	1.4075	3.1933	1.1344	1	NC	No	No	1	SMAD7_exon_chr18:46448280	1	1	0	NA	1	1	1	1	NA	SMAD7_exon_chr18:46448280
B3GNT7	5.5915	12.0536	1.1338	0.4575	NC	No	Yes	1	B3GNT7_exon_chr2:232262441	1	1	0	NA	2	NA	NA	NA	Shortening	B3GNT7_exon_chr2:232262441
TBC1D20	40.5876	88.0506	1.1336	0.0007	UP	No	Yes	1	TBC1D20_exon_chr20:419485	1	1	0	NA	4	0.7693	0.2688	-0.5005	Shortening	TBC1D20_exon_chr20:419485
IRF7	16.292	35.8799	1.1331	0.108	NC	No	No	1	IRF7_exon_chr11:612800	1	1	0	NA	1	1	1	1	NA	IRF7_exon_chr11:612800
IL6R	19.9673	43.8426	1.1324	0.0703	UP	No	Yes	1	IL6R_exon_chr1:154437609	1	1	0	NA	3	0.9856	0.8581	-0.1275	Shortening	IL6R_exon_chr1:154437609
ACBD5	33.9699	74.792	1.1294	0.1821	NC	No	Yes	3	ACBD5_exon_chr10:27486371_x000D_ ACBD5_exon_chr10:27493478_x000D_ ACBD5_exon_chr10:27520749	0.7091_x000D_ 0.0904_x000D_ 0.2005	0.8581_x000D_ 0.0651_x000D_ 0.0767	0.1491_x000D_ -0.0253_x000D_ -0.1238	Up_x000D_ NA_x000D_ NA	1_x000D_ 4_x000D_ 1	1.0_x000D_ NA_x000D_ 1.0	1.0_x000D_ NA_x000D_ 1.0	1.0_x000D_ NA_x000D_ 1.0	NA_x000D_ Both_x000D_ NA	ACBD5_exon_chr10:27486371	ACBD5_exon_chr10:27493478	ACBD5_exon_chr10:27520749
RAD51L3-RFFL	39.2173	84.9695	1.1291	0.0008	UP	No	Yes	1	RAD51L3-RFFL_exon_chr17:33339168	1	1	0	NA	7	1	0.8748	-0.1252	Shortening	RAD51L3-RFFL_exon_chr17:33339168
LRP10	114.326	249.131	1.1288	0	UP	No	Yes	1	LRP10_exon_chr14:23346148	1	1	0	NA	4	0.2554	0.0829	-0.1725	Both	LRP10_exon_chr14:23346148
CD68	5.7742	12.6253	1.1284	0.3288	NC	No	Yes	1	CD68_exon_chr17:7484695	1	1	0	NA	2	NA	NA	NA	Shortening	CD68_exon_chr17:7484695
TXNRD3	8.4056	17.7372	1.1282	0.2599	NC	No	No	1	TXNRD3_exon_chr3:126326816	1	1	0	NA	1	1	1	1	NA	TXNRD3_exon_chr3:126326816
LOC100507412	15.1258	32.5244	1.1281	0.0743	UP	No	No	1	LOC100507412_exon_chrUn:gl000220	1	1	0	NA	2	0.0713	0.0832	0.0119	NA	LOC100507412_exon_chrUn:gl000220
CFAP53	13.1855	28.805	1.1272	0.0926	UP	Yes	No	3	CFAP53_exon_chr18:47753979_x000D_ CFAP53_exon_chr18:47769486_x000D_ CFAP53_exon_chr18:47777346	0.0_x000D_ 0.1361_x000D_ 0.8639	0.0507_x000D_ 0.572_x000D_ 0.3773	0.0507_x000D_ 0.436_x000D_ -0.4867	NA_x000D_ Up_x000D_ NA	1_x000D_ 1_x000D_ 1	1.0_x000D_ 1.0_x000D_ 1.0	1.0_x000D_ 1.0_x000D_ 1.0	1.0_x000D_ 1.0_x000D_ 1.0	NA_x000D_ NA_x000D_ NA	CFAP53_exon_chr18:47753979	CFAP53_exon_chr18:47769486	CFAP53_exon_chr18:47777346
ANAPC13	46.6423	102.196	1.127	0.0002	UP	No	Yes	2	ANAPC13_exon_chr3:134197557_x000D_ ANAPC13_exon_chr3:134201773	0.9209_x000D_ 0.0791	0.9383_x000D_ 0.0617	0.0174_x000D_ -0.0174	NA_x000D_ NA	1_x000D_ 3	1.0_x000D_ 0.9179	1.0_x000D_ 0.3189	1.0_x000D_ -0.599	NA_x000D_ Shortening	ANAPC13_exon_chr3:134197557	ANAPC13_exon_chr3:134201773
NOTCH2NLC	43.8654	96.9721	1.1269	0.0004	UP	No	No	1	NOTCH2NLC_exon_chr1:120539369	1	1	0	NA	1	1	1	1	NA	NOTCH2NLC_exon_chr1:120539369
TFPT	6.5256	13.7378	1.1265	0.3089	NC	No	No	1	TFPT_exon_chr19:54610476	1	1	0	NA	1	1	1	1	NA	TFPT_exon_chr19:54610476
SMCHD1	70.7882	156.259	1.1254	0.0002	UP	No	Yes	2	SMCHD1_exon_chr18:2718155_x000D_ SMCHD1_exon_chr18:2802525	0.2108_x000D_ 0.7892	0.1585_x000D_ 0.8415	-0.0523_x000D_ 0.0523	NA_x000D_ NA	4_x000D_ 1	0.533_x000D_ 1.0	0.1214_x000D_ 1.0	-0.4117_x000D_ 1.0	Shortening_x000D_ NA	SMCHD1_exon_chr18:2718155	SMCHD1_exon_chr18:2802525
LOC647070	1.0194	2.3811	1.1253	1	NC	No	No	1	LOC647070_exon_chr1:182807069	1	1	0	NA	1	1	1	1	NA	LOC647070_exon_chr1:182807069
SLC46A1	35.7874	79.2311	1.1238	0.0089	UP	No	Yes	1	SLC46A1_exon_chr17:26726729	1	1	0	NA	5	0.3191	0.1922	-0.1269	Both	SLC46A1_exon_chr17:26726729
RNASEH1-AS1	14.3277	31.5557	1.1235	0.2448	NC	No	No	1	RNASEH1-AS1_exon_chr2:3608906	1	1	0	NA	1	1	1	1	NA	RNASEH1-AS1_exon_chr2:3608906
GAN	66.904	147.243	1.1232	0.0002	UP	No	Yes	1	GAN_exon_chr16:81411019	1	1	0	NA	6	0.9044	0.1644	-0.74	Shortening	GAN_exon_chr16:81411019
EEF2K	33.6383	73.4665	1.1231	0.0036	UP	No	Yes	1	EEF2K_exon_chr16:22295207	1	1	0	NA	5	0.7058	0.2714	-0.4344	Both	EEF2K_exon_chr16:22295207
ELFN1	5.3855	11.5389	1.1219	0.4121	NC	No	No	1	ELFN1_exon_chr7:1783939	1	1	0	NA	1	1	1	1	NA	ELFN1_exon_chr7:1783939
ABCA10	5.7736	12.2583	1.1211	0.3693	NC	No	No	2	ABCA10_exon_chr17:67160295_x000D_ ABCA10_exon_chr17:67243785	0.5763_x000D_ 0.4237	0.0723_x000D_ 0.9277	-0.504_x000D_ 0.504	NA_x000D_ Up	2_x000D_ 1	NA_x000D_ 1.0	NA_x000D_ 1.0	NA_x000D_ 1.0	NA_x000D_ NA	ABCA10_exon_chr17:67160295	ABCA10_exon_chr17:67243785
RAB3B	54.7769	117.764	1.1196	0.0012	UP	No	Yes	1	RAB3B_exon_chr1:52385786	1	1	0	NA	6	0.5183	0.1547	-0.3636	Both	RAB3B_exon_chr1:52385786
LINC01843	3.8206	8.1723	1.1191	1	NC	No	No	1	LINC01843_exon_chr5:133844096	1	1	0	NA	1	1	1	1	NA	LINC01843_exon_chr5:133844096
UBE4A	56.4443	122.726	1.1182	0.001	UP	No	Yes	1	UBE4A_exon_chr11:118267028	1	1	0	NA	7	0.989	0.3091	-0.6799	Shortening	UBE4A_exon_chr11:118267028
CPSF6	213.239	462.031	1.1164	0	UP	No	Yes	1	CPSF6_exon_chr12:69663291	1	1	0	NA	6	0.1668	0.0333	-0.1335	Shortening	CPSF6_exon_chr12:69663291
ZNF19	2.8748	6.3288	1.1161	0.7439	NC	No	No	1	ZNF19_exon_chr16:71510175	1	1	0	NA	2	NA	NA	NA	NA	ZNF19_exon_chr16:71510175
VPS13A	47.2014	102.507	1.1154	0.0016	UP	Yes	Yes	2	VPS13A_exon_chr9:79999500_x000D_ VPS13A_exon_chr9:80030871	0.4208_x000D_ 0.5163	0.0971_x000D_ 0.8963	-0.3237_x000D_ 0.38	NA_x000D_ Up	1_x000D_ 3	1.0_x000D_ 0.3286	1.0_x000D_ 0.0323	1.0_x000D_ -0.2963	NA_x000D_ Shortening	VPS13A_exon_chr9:79999500	VPS13A_exon_chr9:80030871
TMEM160	25.6569	55.9778	1.1152	0.0128	UP	No	No	1	TMEM160_exon_chr19:47549510	1	1	0	NA	1	1	1	1	NA	TMEM160_exon_chr19:47549510
PPP4R3B	132.959	287.385	1.1135	0	UP	No	Yes	2	PPP4R3B_exon_chr2:55777142_x000D_ PPP4R3B_exon_chr2:55791633	0.2871_x000D_ 0.711	0.4216_x000D_ 0.5672	0.1345_x000D_ -0.1438	Up_x000D_ Down	6_x000D_ 2	0.6373_x000D_ 0.9404	0.2627_x000D_ 0.9588	-0.3746_x000D_ 0.0184	Both_x000D_ NA	PPP4R3B_exon_chr2:55777142	PPP4R3B_exon_chr2:55791633
FAM72C	87.1699	188.536	1.1131	0.0006	UP	No	Yes	1	FAM72C_exon_chr1:143897641	1	1	0	NA	4	0.7379	0.1215	-0.6164	Shortening	FAM72C_exon_chr1:143897641
ARID1B	19.4686	41.392	1.1114	0.0378	UP	No	Yes	1	ARID1B_exon_chr6:157527300	1	1	0	NA	2	0.8465	0.0693	-0.7772	Shortening	ARID1B_exon_chr6:157527300
TBC1D25	11.5258	25.7128	1.111	0.1333	NC	No	No	1	TBC1D25_exon_chrX:48418001	1	1	0	NA	1	1	1	1	NA	TBC1D25_exon_chrX:48418001
TNPO1	478.083	1030.98	1.111	0	UP	No	Yes	1	TNPO1_exon_chr5:72204535	1	1	0	NA	6	0.2284	0.0607	-0.1677	Shortening	TNPO1_exon_chr5:72204535
SPOPL	53.0216	114.323	1.1104	0	UP	No	Yes	1	SPOPL_exon_chr2:139326505	1	1	0	NA	7	0.7574	0.1793	-0.5781	Shortening	SPOPL_exon_chr2:139326505
VEGFA	74.2634	160.578	1.1103	0	UP	No	Yes	1	VEGFA_exon_chr6:43752277	1	1	0	NA	3	0.6548	0.2099	-0.445	Shortening	VEGFA_exon_chr6:43752277
SMPDL3A	2.9118	6.5365	1.1096	0.564	NC	No	No	1	SMPDL3A_exon_chr6:123130235	1	1	0	NA	1	1	1	1	NA	SMPDL3A_exon_chr6:123130235
SUN2	49.9195	108.453	1.1085	0.0012	UP	No	No	1	SUN2_exon_chr22:39132385	1	1	0	NA	1	1	1	1	NA	SUN2_exon_chr22:39132385
SIPA1L2	15.6116	33.4778	1.1083	0.027	UP	No	Yes	1	SIPA1L2_exon_chr1:232535019	1	1	0	NA	4	0.9748	0.407	NA	Shortening	SIPA1L2_exon_chr1:232535019
MFSD9	34.1727	74.2612	1.1078	0.0012	UP	No	Yes	1	MFSD9_exon_chr2:103335666	1	1	0	NA	4	0.4952	0.1512	-0.344	Shortening	MFSD9_exon_chr2:103335666
LINC01807	4.4272	9.2963	1.1077	0.4653	NC	No	No	1	LINC01807_exon_chr2:229348214	1	1	0	NA	2	NA	NA	NA	NA	LINC01807_exon_chr2:229348214
SETMAR	8.1763	17.824	1.1074	0.1683	NC	No	Yes	1	SETMAR_exon_chr3:4357895	1	1	0	NA	2	NA	NA	NA	Shortening	SETMAR_exon_chr3:4357895
TMEM81	3.5912	7.9351	1.107	0.4803	NC	No	No	1	TMEM81_exon_chr1:205053588	1	1	0	NA	1	1	1	1	NA	TMEM81_exon_chr1:205053588
SELENOP	14.5793	30.9349	1.1068	0.1163	NC	Yes	No	2	SELENOP_exon_chr5:42801433_x000D_ SELENOP_exon_chr5:42807210	0.8413_x000D_ 0.1587	0.4938_x000D_ 0.5062	-0.3475_x000D_ 0.3475	NA_x000D_ Up	1_x000D_ 3	1.0_x000D_ NA	1.0_x000D_ NA	1.0_x000D_ NA	NA_x000D_ NA	SELENOP_exon_chr5:42801433	SELENOP_exon_chr5:42807210
WNT3	4.5131	9.8798	1.1053	0.5696	NC	No	Yes	1	WNT3_exon_chr17:44841987	1	1	0	NA	4	NA	NA	NA	Shortening	WNT3_exon_chr17:44841987
RRAGC	19.3488	41.3863	1.1051	0.0941	UP	No	Yes	1	RRAGC_exon_chr1:39305376	1	1	0	NA	2	NA	NA	NA	Shortening	RRAGC_exon_chr1:39305376
KIAA1614-AS1	2.6934	5.9008	1.1044	1	NC	No	No	1	KIAA1614-AS1_exon_chr1:180920054	1	1	0	NA	1	1	1	1	NA	KIAA1614-AS1_exon_chr1:180920054
TLCD5	56.2839	120.263	1.1038	0.0005	UP	No	Yes	1	TLCD5_exon_chr11:120200685	1	1	0	NA	2	0.4335	0.1031	-0.3304	Shortening	TLCD5_exon_chr11:120200685
STPG1	7.3149	15.8475	1.1037	0.2317	NC	No	No	2	STPG1_exon_chr1:24685109_x000D_ STPG1_exon_chr1:24696329	0.8941_x000D_ 0.1059	0.9225_x000D_ 0.0775	0.0284_x000D_ -0.0284	NA_x000D_ NA	1_x000D_ 1	1.0_x000D_ 1.0	1.0_x000D_ 1.0	1.0_x000D_ 1.0	NA_x000D_ NA	STPG1_exon_chr1:24685109	STPG1_exon_chr1:24696329
UNC13B	21.3156	46.8461	1.1035	0.026	UP	No	No	1	UNC13B_exon_chr9:35403744	1	1	0	NA	1	1	1	1	NA	UNC13B_exon_chr9:35403744
NAGA	26.5893	56.9744	1.1035	0.0075	UP	No	Yes	1	NAGA_exon_chr22:42456417	1	1	0	NA	2	0.6887	0.469	-0.2196	Shortening	NAGA_exon_chr22:42456417
CPNE9	2.1109	4.6119	1.1031	1	NC	No	No	2	CPNE9_exon_chr3:9769030_x000D_ CPNE9_exon_chr3:9771190	0.3335_x000D_ 0.6665	0.8773_x000D_ 0.1227	0.5438_x000D_ -0.5438	NA_x000D_ NA	1_x000D_ 1	1.0_x000D_ 1.0	1.0_x000D_ 1.0	1.0_x000D_ 1.0	NA_x000D_ NA	CPNE9_exon_chr3:9769030	CPNE9_exon_chr3:9771190
PIK3C2A	30.3875	64.9147	1.1023	0.023	UP	No	Yes	3	PIK3C2A_exon_chr11:17111467_x000D_ PIK3C2A_exon_chr11:17167489_x000D_ PIK3C2A_exon_chr11:17191353	0.5651_x000D_ 0.1356_x000D_ 0.2993	0.7293_x000D_ 0.0396_x000D_ 0.2311	0.1643_x000D_ -0.0961_x000D_ -0.0682	Up_x000D_ NA_x000D_ NA	1_x000D_ 5_x000D_ 1	1.0_x000D_ NA_x000D_ 1.0	1.0_x000D_ NA_x000D_ 1.0	1.0_x000D_ NA_x000D_ 1.0	NA_x000D_ Both_x000D_ NA	PIK3C2A_exon_chr11:17111467	PIK3C2A_exon_chr11:17167489	PIK3C2A_exon_chr11:17191353
WDR37	5.4466	11.7876	1.102	0.4053	NC	No	Yes	1	WDR37_exon_chr10:1175152	1	1	0	NA	3	NA	NA	NA	Shortening	WDR37_exon_chr10:1175152
DPP8	31.3941	67.1481	1.1018	0.0031	UP	No	Yes	2	DPP8_exon_chr15:65739344_x000D_ DPP8_exon_chr15:65793117	0.9386_x000D_ 0.0614	0.9408_x000D_ 0.0592	0.0022_x000D_ -0.0022	NA_x000D_ NA	1_x000D_ 6	1.0_x000D_ 0.738	1.0_x000D_ 0.2361	1.0_x000D_ -0.5019	NA_x000D_ Shortening	DPP8_exon_chr15:65739344	DPP8_exon_chr15:65793117
SAR1A	300.137	645.844	1.1018	0	UP	No	Yes	1	SAR1A_exon_chr10:71912348	1	1	0	NA	5	0.671	0.1398	-0.5312	Shortening	SAR1A_exon_chr10:71912348
FBXL5	23.0234	49.1023	1.1011	0.0347	UP	No	No	1	FBXL5_exon_chr4:15607422	1	1	0	NA	2	0.1092	0.1133	0.004	NA	FBXL5_exon_chr4:15607422
CCDC125	30.995	66.9405	1.1005	0.0036	UP	No	Yes	1	CCDC125_exon_chr5:68578861	1	1	0	NA	4	0.9447	0.2781	-0.6666	Shortening	CCDC125_exon_chr5:68578861
LOC100652758	1.0551	2.1847	1.0997	1	NC	No	No	1	LOC100652758_exon_chr5:151150333	1	1	0	NA	1	1	1	1	NA	LOC100652758_exon_chr5:151150333
SRD5A3	43.2526	91.5741	1.0997	0.0104	UP	No	Yes	1	SRD5A3_exon_chr4:56235998	1	1	0	NA	3	0.2203	0.0149	-0.2055	Shortening	SRD5A3_exon_chr4:56235998
ZNF268	12.2779	27.0801	1.0992	0.1343	NC	No	Yes	1	ZNF268_exon_chr12:133778729	1	1	0	NA	6	NA	NA	NA	Both	ZNF268_exon_chr12:133778729
SIL1	50.924	109.628	1.0992	0.0014	UP	No	No	1	SIL1_exon_chr5:138283162	1	1	0	NA	1	1	1	1	NA	SIL1_exon_chr5:138283162
LOC728743	1.4796	3.0719	1.0991	1	NC	No	No	1	LOC728743_exon_chr7:150107247	1	1	0	NA	2	NA	NA	NA	NA	LOC728743_exon_chr7:150107247
SGCB	46.5117	100.673	1.0984	0.003	UP	No	Yes	1	SGCB_exon_chr4:52890326	1	1	0	NA	6	0.5598	0.1146	-0.4452	Shortening	SGCB_exon_chr4:52890326
ZNF462	25.291	54.1206	1.0982	0.0228	UP	No	Yes	1	ZNF462_exon_chr9:109773103	1	1	0	NA	4	0.5394	0.0974	-0.4421	Shortening	ZNF462_exon_chr9:109773103
CCZ1P-OR7E38P	11.1013	24.5688	1.0971	0.2188	NC	No	No	1	CCZ1P-OR7E38P_exon_chr7:97596289	1	1	0	NA	1	1	1	1	NA	CCZ1P-OR7E38P_exon_chr7:97596289
EXT2	51.7982	111.171	1.0956	0.002	UP	No	No	1	EXT2_exon_chr11:44265698	1	1	0	NA	5	0.1354	0.0981	-0.0374	NA	EXT2_exon_chr11:44265698
HSPBAP1	11.5985	25.3694	1.0954	0.2596	NC	No	Yes	1	HSPBAP1_exon_chr3:122459722	1	1	0	NA	2	NA	NA	NA	Shortening	HSPBAP1_exon_chr3:122459722
LIG3	26.4456	56.865	1.0949	0.0525	UP	No	No	2	LIG3_exon_chr17:33330013_x000D_ LIG3_exon_chr17:33331291	0.1258_x000D_ 0.8742	0.2507_x000D_ 0.7493	0.1249_x000D_ -0.1249	NA_x000D_ NA	1_x000D_ 2	1.0_x000D_ 0.5385	1.0_x000D_ 0.3156	1.0_x000D_ -0.223	NA_x000D_ NA	LIG3_exon_chr17:33330013	LIG3_exon_chr17:33331291
ZNF189	16.8508	36.6565	1.0944	0.061	UP	No	No	1	ZNF189_exon_chr9:104170210	1	1	0	NA	1	1	1	1	NA	ZNF189_exon_chr9:104170210
DBIL5P	1.1279	2.2857	1.0939	1	NC	No	No	1	DBIL5P_exon_chr17:655572	1	1	0	NA	1	1	1	1	NA	DBIL5P_exon_chr17:655572
RABL3	26.2003	55.1971	1.0939	0.0365	UP	No	Yes	1	RABL3_exon_chr3:120408735	1	1	0	NA	6	0.6565	0.2107	-0.4458	Both	RABL3_exon_chr3:120408735
KDM6A	8.7108	19.1999	1.0936	0.2547	NC	No	Yes	1	KDM6A_exon_chrX:44970626	1	1	0	NA	4	NA	NA	NA	Both	KDM6A_exon_chrX:44970626
PPT2	2.4269	5.7304	1.0928	0.6246	NC	No	No	1	PPT2_exon_chr6:32130583	1	1	0	NA	1	1	1	1	NA	PPT2_exon_chr6:32130583
SCARB2	79.1614	167.973	1.0919	0.0013	UP	No	Yes	1	SCARB2_exon_chr4:77082904	1	1	0	NA	3	0.5638	0.088	-0.4758	Shortening	SCARB2_exon_chr4:77082904
CROCC	10.7103	22.2978	1.0916	0.1712	NC	No	No	1	CROCC_exon_chr1:17298854	1	1	0	NA	1	1	1	1	NA	CROCC_exon_chr1:17298854
INVS	9.9108	21.3123	1.0914	0.1576	NC	No	No	1	INVS_exon_chr9:103062849	1	1	0	NA	3	NA	NA	NA	NA	INVS_exon_chr9:103062849
HTR7	20.9621	45.0368	1.0912	0.1321	NC	No	Yes	1	HTR7_exon_chr10:92502285	1	1	0	NA	3	1	0.6691	-0.3309	Shortening	HTR7_exon_chr10:92502285
UGGT1	103.767	222.217	1.0906	0	UP	No	Yes	1	UGGT1_exon_chr2:128947290	1	1	0	NA	8	0.663	0.1085	-0.5545	Shortening	UGGT1_exon_chr2:128947290
ZNF530	2.3169	4.8837	1.0902	1	NC	No	No	2	ZNF530_exon_chr19:58117053_x000D_ ZNF530_exon_chr19:58123870	0.0_x000D_ 1.0	0.0609_x000D_ 0.9391	0.0609_x000D_ -0.0609	NA_x000D_ NA	1_x000D_ 2	1.0_x000D_ NA	1.0_x000D_ NA	1.0_x000D_ NA	NA_x000D_ NA	ZNF530_exon_chr19:58117053	ZNF530_exon_chr19:58123870
CASC9	10.0191	20.725	1.09	0.2751	NC	No	No	1	CASC9_exon_chr8:76136593	1	1	0	NA	2	NA	NA	NA	NA	CASC9_exon_chr8:76136593
ASCC1	53.9071	114.319	1.0883	0.0008	UP	No	Yes	1	ASCC1_exon_chr10:73857208	1	1	0	NA	5	0.518	0.2284	-0.2896	Shortening	ASCC1_exon_chr10:73857208
NALT1	1.8072	3.6929	1.088	1	NC	No	No	1	NALT1_exon_chr9:139443997	1	1	0	NA	1	1	1	1	NA	NALT1_exon_chr9:139443997
LAMC2	17.322	36.6132	1.0878	0.0434	UP	Yes	No	2	LAMC2_exon_chr1:183206486_x000D_ LAMC2_exon_chr1:183212281	0.5508_x000D_ 0.4492	0.319_x000D_ 0.681	-0.2319_x000D_ 0.2319	NA_x000D_ Up	1_x000D_ 3	1.0_x000D_ NA	1.0_x000D_ NA	1.0_x000D_ NA	NA_x000D_ NA	LAMC2_exon_chr1:183206486	LAMC2_exon_chr1:183212281
ANKH	54.3822	115.677	1.0874	0.0012	UP	No	Yes	1	ANKH_exon_chr5:14711419	1	1	0	NA	3	0.4248	0.1185	-0.3063	Shortening	ANKH_exon_chr5:14711419
TROAP	118.146	250.397	1.0868	0.0007	UP	Yes	No	2	TROAP_exon_chr12:49717937_x000D_ TROAP_exon_chr12:49725355	0.8168_x000D_ 0.1832	0.9225_x000D_ 0.0775	0.1057_x000D_ -0.1057	Up_x000D_ NA	1_x000D_ 1	1.0_x000D_ 1.0	1.0_x000D_ 1.0	1.0_x000D_ 1.0	NA_x000D_ NA	TROAP_exon_chr12:49717937	TROAP_exon_chr12:49725355
VEZT	38.4933	82.7802	1.0865	0.0098	UP	No	Yes	1	VEZT_exon_chr12:95692869	1	1	0	NA	3	0.8585	0.4243	-0.4342	Shortening	VEZT_exon_chr12:95692869
TMEM158	18.5742	40.0365	1.086	0.1217	NC	No	Yes	1	TMEM158_exon_chr3:45267779	1	1	0	NA	2	NA	NA	NA	Shortening	TMEM158_exon_chr3:45267779
HIVEP3	15.5894	33.4226	1.0856	0.2199	NC	No	No	2	HIVEP3_exon_chr1:41976937_x000D_ HIVEP3_exon_chr1:42314116	0.8684_x000D_ 0.1316	0.6144_x000D_ 0.3856	-0.2541_x000D_ 0.2541	NA_x000D_ NA	2_x000D_ 2	NA_x000D_ NA	NA_x000D_ NA	NA_x000D_ NA	NA_x000D_ NA	HIVEP3_exon_chr1:41976937	HIVEP3_exon_chr1:42314116
HSF2BP	0.7645	1.676	1.0851	1	NC	No	No	1	HSF2BP_exon_chr21:44949842	1	1	0	NA	1	1	1	1	NA	HSF2BP_exon_chr21:44949842
RBPMS	39.1084	82.5005	1.0845	0.0135	UP	No	Yes	2	RBPMS_exon_chr8:30404808_x000D_ RBPMS_exon_chr8:30428153	0.7593_x000D_ 0.2407	0.7024_x000D_ 0.2976	-0.0568_x000D_ 0.0568	NA_x000D_ NA	1_x000D_ 4	1.0_x000D_ NA	1.0_x000D_ NA	1.0_x000D_ NA	NA_x000D_ Shortening	RBPMS_exon_chr8:30404808	RBPMS_exon_chr8:30428153
SLC9A8	11.5964	24.1958	1.0835	0.1632	NC	No	No	1	SLC9A8_exon_chr20:48504365	1	1	0	NA	3	NA	NA	NA	NA	SLC9A8_exon_chr20:48504365
PGAP3	7.1707	15.8794	1.0826	0.4077	NC	No	No	1	PGAP3_exon_chr17:37829119	1	1	0	NA	1	1	1	1	NA	PGAP3_exon_chr17:37829119
SUMO1P3	77.062	161.658	1.0786	0.0001	UP	No	No	1	SUMO1P3_exon_chr1:160287054	1	1	0	NA	1	1	1	1	NA	SUMO1P3_exon_chr1:160287054
ITGA2	52.8619	110.944	1.0784	0.0008	UP	No	Yes	1	ITGA2_exon_chr5:52386348	1	1	0	NA	6	0.9197	0.8292	-0.0905	Shortening	ITGA2_exon_chr5:52386348
EIF4E3	21.1055	43.6518	1.0779	0.0349	UP	No	Yes	1	EIF4E3_exon_chr3:71733879	1	1	0	NA	4	0.8621	0.4494	-0.4127	Shortening	EIF4E3_exon_chr3:71733879
ACOT8	10.2379	21.589	1.0773	0.1841	NC	No	No	1	ACOT8_exon_chr20:44470595	1	1	0	NA	1	1	1	1	NA	ACOT8_exon_chr20:44470595
AQR	40.216	85.3749	1.0755	0.0368	UP	No	Yes	1	AQR_exon_chr15:35149307	1	1	0	NA	5	0.1995	0.0743	-0.1251	Both	AQR_exon_chr15:35149307
NT5C2	131.078	278.693	1.0755	0	UP	No	Yes	1	NT5C2_exon_chr10:104849665	1	1	0	NA	9	0.8752	0.5353	-0.3399	Both	NT5C2_exon_chr10:104849665
CAPG	22.6222	47.0741	1.0753	0.0323	UP	No	No	1	CAPG_exon_chr2:85622081	1	1	0	NA	1	1	1	1	NA	CAPG_exon_chr2:85622081
OSMR	43.6715	92.9752	1.0753	0.0008	UP	No	Yes	2	OSMR_exon_chr5:38886140_x000D_ OSMR_exon_chr5:38932973	0.0439_x000D_ 0.9122	0.0673_x000D_ 0.9046	0.0234_x000D_ -0.0076	NA_x000D_ NA	1_x000D_ 5	1.0_x000D_ 0.9411	1.0_x000D_ 0.6263	1.0_x000D_ -0.3148	NA_x000D_ Shortening	OSMR_exon_chr5:38886140	OSMR_exon_chr5:38932973
DIRAS3	1.9288	4.0862	1.0745	1	NC	No	No	1	DIRAS3_exon_chr1:68513045	1	1	0	NA	1	1	1	1	NA	DIRAS3_exon_chr1:68513045
SOAT1	43.7705	93.2508	1.0741	0.0032	UP	No	Yes	1	SOAT1_exon_chr1:179322719	1	1	0	NA	9	0.3066	0.1229	-0.1838	Shortening	SOAT1_exon_chr1:179322719
CGREF1	4.1599	8.3921	1.074	0.7298	NC	No	No	1	CGREF1_exon_chr2:27324756	1	1	0	NA	1	1	1	1	NA	CGREF1_exon_chr2:27324756
NBPF1	96.7176	203.732	1.0725	0.0812	UP	No	No	2	NBPF1_exon_chr1:16890681_x000D_ NBPF1_exon_chr1:16891413	0.1137_x000D_ 0.8863	0.0828_x000D_ 0.9172	-0.0309_x000D_ 0.0309	NA_x000D_ NA	1_x000D_ 1	1.0_x000D_ 1.0	1.0_x000D_ 1.0	1.0_x000D_ 1.0	NA_x000D_ NA	NBPF1_exon_chr1:16890681	NBPF1_exon_chr1:16891413
CD9	397.905	836.843	1.0721	0	UP	No	Yes	1	CD9_exon_chr12:6346928	1	1	0	NA	3	0.8673	0.4298	-0.4375	Shortening	CD9_exon_chr12:6346928
CA5BP1	8.6366	17.7717	1.0718	0.2562	NC	No	No	2	CA5BP1_exon_chrX:15715362_x000D_ CA5BP1_exon_chrX:15720904	0.1641_x000D_ 0.8359	0.0998_x000D_ 0.9002	-0.0643_x000D_ 0.0643	NA_x000D_ NA	1_x000D_ 1	1.0_x000D_ 1.0	1.0_x000D_ 1.0	1.0_x000D_ 1.0	NA_x000D_ NA	CA5BP1_exon_chrX:15715362	CA5BP1_exon_chrX:15720904
LLGL2	214.81	452.34	1.0716	0	UP	Yes	No	2	LLGL2_exon_chr17:73560433_x000D_ LLGL2_exon_chr17:73570951	0.5459_x000D_ 0.4541	0.8741_x000D_ 0.1259	0.3282_x000D_ -0.3282	Up_x000D_ NA	1_x000D_ 1	1.0_x000D_ 1.0	1.0_x000D_ 1.0	1.0_x000D_ 1.0	NA_x000D_ NA	LLGL2_exon_chr17:73560433	LLGL2_exon_chr17:73570951
LOC652276	63.3104	133.419	1.0681	0.0088	UP	No	Yes	2	LOC652276_exon_chr16:2647651_x000D_ LOC652276_exon_chr16:2678825	0.8339_x000D_ 0.1661	0.9069_x000D_ 0.0931	0.073_x000D_ -0.073	NA_x000D_ NA	2_x000D_ 6	NA_x000D_ 0.9439	NA_x000D_ 0.2519	NA_x000D_ -0.692	NA_x000D_ Shortening	LOC652276_exon_chr16:2647651	LOC652276_exon_chr16:2678825
OR51B2	2.5354	5.3084	1.0678	1	NC	No	No	1	OR51B2_exon_chr11:5345582	1	1	0	NA	2	NA	NA	NA	NA	OR51B2_exon_chr11:5345582
NFATC2IP	52.952	111.281	1.0675	0.0043	UP	No	Yes	1	NFATC2IP_exon_chr16:28975025	1	1	0	NA	3	0.5284	0.0445	-0.4839	Shortening	NFATC2IP_exon_chr16:28975025
ZNF234	0.8978	1.881	1.0671	1	NC	No	No	1	ZNF234_exon_chr19:44660404	1	1	0	NA	1	1	1	1	NA	ZNF234_exon_chr19:44660404
EIF2B3	25.4167	54.3909	1.0667	0.056	UP	Yes	No	2	EIF2B3_exon_chr1:45316675_x000D_ EIF2B3_exon_chr1:45340498	0.6206_x000D_ 0.3794	0.1849_x000D_ 0.8151	-0.4357_x000D_ 0.4357	NA_x000D_ Up	1_x000D_ 2	1.0_x000D_ NA	1.0_x000D_ NA	1.0_x000D_ NA	NA_x000D_ NA	EIF2B3_exon_chr1:45316675	EIF2B3_exon_chr1:45340498
VPS9D1	2.547	5.0079	1.0664	0.7528	NC	No	No	1	VPS9D1_exon_chr16:89774362	1	1	0	NA	1	1	1	1	NA	VPS9D1_exon_chr16:89774362
DNAJB9	13.4176	28.7415	1.0662	0.1163	NC	No	Yes	1	DNAJB9_exon_chr7:108213342	1	1	0	NA	4	NA	NA	NA	Shortening	DNAJB9_exon_chr7:108213342
RFPL2	1.0915	2.1934	1.0648	1	NC	No	No	1	RFPL2_exon_chr22:32587339	1	1	0	NA	1	1	1	1	NA	RFPL2_exon_chr22:32587339
GPR37	3.7244	7.8833	1.0647	0.6922	NC	No	Yes	1	GPR37_exon_chr7:124387397	1	1	0	NA	3	NA	NA	NA	Shortening	GPR37_exon_chr7:124387397
JHY	5.8106	12.2761	1.0646	0.4171	NC	No	No	1	JHY_exon_chr11:122829955	1	1	0	NA	1	1	1	1	NA	JHY_exon_chr11:122829955
TPCN2	17.3215	36.1366	1.0646	0.1406	NC	No	Yes	1	TPCN2_exon_chr11:68855342	1	1	0	NA	3	0.3978	0.1156	NA	Shortening	TPCN2_exon_chr11:68855342
FECH	33.2122	68.7388	1.0644	0.0165	UP	No	Yes	1	FECH_exon_chr18:55218078	1	1	0	NA	9	0.5488	0.0888	-0.46	Shortening	FECH_exon_chr18:55218078
SSR1	234.926	491.544	1.0617	0	UP	No	Yes	1	SSR1_exon_chr6:7290164	1	1	0	NA	10	0.7754	0.1653	-0.6102	Both	SSR1_exon_chr6:7290164
FLT3LG	6.1638	13.6833	1.0616	0.3886	NC	No	No	1	FLT3LG_exon_chr19:49989220	1	1	0	NA	1	1	1	1	NA	FLT3LG_exon_chr19:49989220
SHLD2	53.0713	110.926	1.0601	0.0003	UP	No	Yes	1	SHLD2_exon_chr10:88948778	1	1	0	NA	3	0.9129	0.2725	-0.6404	Both	SHLD2_exon_chr10:88948778
DDAH1	16.6674	34.6072	1.0589	0.0875	UP	No	Yes	1	DDAH1_exon_chr1:85787251	1	1	0	NA	2	1	0.761	-0.239	Shortening	DDAH1_exon_chr1:85787251
FBXO8	10.3848	22.052	1.0584	0.2719	NC	No	Yes	1	FBXO8_exon_chr4:175158750	1	1	0	NA	2	NA	NA	NA	Lengthening	FBXO8_exon_chr4:175158750
GAL3ST4	2.2805	4.69	1.0572	1	NC	No	No	1	GAL3ST4_exon_chr7:99758582	1	1	0	NA	1	1	1	1	NA	GAL3ST4_exon_chr7:99758582
FLJ20021	13.4889	27.6983	1.0563	0.0886	UP	No	No	1	FLJ20021_exon_chr4:102269480	1	1	0	NA	1	1	1	1	NA	FLJ20021_exon_chr4:102269480
USP46-DT	0.7762	1.4795	1.056	1	NC	No	No	1	USP46-DT_exon_chr4:53527058	1	1	0	NA	1	1	1	1	NA	USP46-DT_exon_chr4:53527058
GTF2IRD2B	7.1214	15.2901	1.0554	0.5261	NC	No	No	1	GTF2IRD2B_exon_chr7:74528190	1	1	0	NA	1	1	1	1	NA	GTF2IRD2B_exon_chr7:74528190
SMAD6	18.2427	37.8334	1.0549	0.2107	NC	No	Yes	1	SMAD6_exon_chr15:67073334	1	1	0	NA	3	NA	NA	NA	Shortening	SMAD6_exon_chr15:67073334
CHAC1	26.8788	55.6088	1.0548	0.4748	NC	No	No	1	CHAC1_exon_chr15:41247570	1	1	0	NA	1	1	1	1	NA	CHAC1_exon_chr15:41247570
NPEPPS	278.969	578.842	1.0542	0	UP	No	Yes	1	NPEPPS_exon_chr17:45699133	1	1	0	NA	4	0.4189	0.0566	-0.3623	Shortening	NPEPPS_exon_chr17:45699133
ATXN1-AS1	4.4024	8.788	1.0526	0.6383	NC	No	Yes	1	ATXN1-AS1_exon_chr6:16762582	1	1	0	NA	3	NA	NA	NA	Shortening	ATXN1-AS1_exon_chr6:16762582
COMMD3	44.3126	91.6177	1.052	0.0051	UP	No	No	1	COMMD3_exon_chr10:22608867	1	1	0	NA	1	1	1	1	NA	COMMD3_exon_chr10:22608867
MIPOL1	4.1497	9.2327	1.0513	0.5175	NC	No	Yes	1	MIPOL1_exon_chr14:38016109	1	1	0	NA	3	NA	NA	NA	Shortening	MIPOL1_exon_chr14:38016109
TRIQK	12.458	25.8922	1.0511	0.1279	NC	No	Yes	1	TRIQK_exon_chr8:93898963	1	1	0	NA	4	NA	NA	NA	Shortening	TRIQK_exon_chr8:93898963
PRDM10	6.0772	12.7181	1.0506	0.4397	NC	No	No	1	PRDM10_exon_chr11:129772411	1	1	0	NA	1	1	1	1	NA	PRDM10_exon_chr11:129772411
PRIMPOL	2.1357	4.6637	1.0503	1	NC	No	No	1	PRIMPOL_exon_chr4:185615675	1	1	0	NA	1	1	1	1	NA	PRIMPOL_exon_chr4:185615675
MIER1	120.219	247.259	1.0492	0	UP	No	Yes	4	MIER1_exon_chr1:67411832_x000D_ MIER1_exon_chr1:67423741_x000D_ MIER1_exon_chr1:67428770_x000D_ MIER1_exon_chr1:67450254	0.0833_x000D_ 0.3943_x000D_ 0.1967_x000D_ 0.3258	0.06_x000D_ 0.421_x000D_ 0.234_x000D_ 0.285	-0.0233_x000D_ 0.0267_x000D_ 0.0373_x000D_ -0.0408	NA_x000D_ NA_x000D_ NA_x000D_ NA	1_x000D_ 7_x000D_ 1_x000D_ 2	1.0_x000D_ 0.7825_x000D_ 1.0_x000D_ 0.7228	1.0_x000D_ 0.5273_x000D_ 1.0_x000D_ 0.7551	1.0_x000D_ -0.2553_x000D_ 1.0_x000D_ 0.0323	NA_x000D_ Both_x000D_ NA_x000D_ NA	MIER1_exon_chr1:67411832	MIER1_exon_chr1:67423741	MIER1_exon_chr1:67428770	MIER1_exon_chr1:67450254
FAM169A	50.2458	104.303	1.0478	0.0013	UP	No	Yes	1	FAM169A_exon_chr5:74077833	1	1	0	NA	5	0.937	0.1668	-0.7703	Shortening	FAM169A_exon_chr5:74077833
SEC22C	92.27	192.396	1.0477	0.0003	UP	No	Yes	1	SEC22C_exon_chr3:42594940	1	1	0	NA	4	0.4617	0.1377	-0.3241	Shortening	SEC22C_exon_chr3:42594940
EPB41L4A	2.5106	4.9647	1.0475	0.7343	NC	No	No	2	EPB41L4A_exon_chr5:111500815_x000D_ EPB41L4A_exon_chr5:111530342	0.0_x000D_ 1.0	0.1652_x000D_ 0.8348	0.1652_x000D_ -0.1652	NA_x000D_ NA	1_x000D_ 1	1.0_x000D_ 1.0	1.0_x000D_ 1.0	1.0_x000D_ 1.0	NA_x000D_ NA	EPB41L4A_exon_chr5:111500815	EPB41L4A_exon_chr5:111530342
TMEM185A	6.3078	12.8943	1.0474	0.4815	NC	No	No	2	TMEM185A_exon_chrX:148679915_x000D_ TMEM185A_exon_chrX:148685736	0.4288_x000D_ 0.5712	0.8438_x000D_ 0.1562	0.415_x000D_ -0.415	Up_x000D_ NA	2_x000D_ 1	NA_x000D_ 1.0	NA_x000D_ 1.0	NA_x000D_ 1.0	NA_x000D_ NA	TMEM185A_exon_chrX:148679915	TMEM185A_exon_chrX:148685736
TANGO2	7.6076	16.712	1.0472	0.3338	NC	No	No	1	TANGO2_exon_chr22:20052064	1	1	0	NA	1	1	1	1	NA	TANGO2_exon_chr22:20052064
CLDND1	431.732	891.297	1.0467	0	UP	No	Yes	1	CLDND1_exon_chr3:98235723	1	1	0	NA	6	0.9125	0.2467	-0.6658	Shortening	CLDND1_exon_chr3:98235723
LINC01976	3.1536	6.2736	1.0466	1	NC	No	No	1	LINC01976_exon_chr17:42015928	1	1	0	NA	1	1	1	1	NA	LINC01976_exon_chr17:42015928
MAP3K9	31.8704	67.1286	1.0462	0.0253	UP	No	Yes	1	MAP3K9_exon_chr14:71197581	1	1	0	NA	2	0.3386	0.0554	-0.2833	Shortening	MAP3K9_exon_chr14:71197581
COMMD3-BMI1	2.1837	4.5514	1.0454	1	NC	No	No	1	COMMD3-BMI1_exon_chr10:22616523	1	1	0	NA	1	1	1	1	NA	COMMD3-BMI1_exon_chr10:22616523
FRG1CP	29.4266	60.6505	1.0452	0.0943	UP	No	No	1	FRG1CP_exon_chrUn:gl000241	1	1	0	NA	1	1	1	1	NA	FRG1CP_exon_chrUn:gl000241
PANCR	1.8072	3.5688	1.0451	1	NC	No	No	1	PANCR_exon_chr4:111516964	1	1	0	NA	1	1	1	1	NA	PANCR_exon_chr4:111516964
DCBLD2	1037.12	2139.66	1.0449	0	UP	No	Yes	2	DCBLD2_exon_chr3:98518685_x000D_ DCBLD2_exon_chr3:98538261	0.7269_x000D_ 0.2491	0.7844_x000D_ 0.1959	0.0575_x000D_ -0.0532	NA_x000D_ NA	17_x000D_ 1	0.8982_x000D_ 1.0	0.438_x000D_ 1.0	-0.4602_x000D_ 1.0	Both_x000D_ NA	DCBLD2_exon_chr3:98518685	DCBLD2_exon_chr3:98538261
TUBGCP5	21.144	43.7996	1.0431	0.0265	UP	No	No	2	TUBGCP5_exon_chr15:22866895_x000D_ TUBGCP5_exon_chr15:22873201	0.0666_x000D_ 0.767	0.6055_x000D_ 0.327	0.5389_x000D_ -0.44	Up_x000D_ NA	1_x000D_ 1	1.0_x000D_ 1.0	1.0_x000D_ 1.0	1.0_x000D_ 1.0	NA_x000D_ NA	TUBGCP5_exon_chr15:22866895	TUBGCP5_exon_chr15:22873201
GGT1	11.6336	24.3755	1.0425	0.1298	NC	No	No	1	GGT1_exon_chr22:25024659	1	1	0	NA	1	1	1	1	NA	GGT1_exon_chr22:25024659
INTS7	65.1028	132.995	1.0413	0.0002	UP	No	Yes	1	INTS7_exon_chr1:212115453	1	1	0	NA	3	0.7143	0.367	-0.3472	Shortening	INTS7_exon_chr1:212115453
MYO7A	2.2194	4.4099	1.0407	1	NC	No	No	1	MYO7A_exon_chr11:76925651	1	1	0	NA	1	1	1	1	NA	MYO7A_exon_chr11:76925651
CEP350	100.504	208.159	1.0405	0	UP	No	Yes	6	CEP350_exon_chr1:179981063_x000D_ CEP350_exon_chr1:180022884_x000D_ CEP350_exon_chr1:180044156_x000D_ CEP350_exon_chr1:180061748_x000D_ CEP350_exon_chr1:180067997_x000D_ CEP350_exon_chr1:180080131	0.2064_x000D_ 0.0765_x000D_ 0.181_x000D_ 0.0588_x000D_ 0.1187_x000D_ 0.29	0.129_x000D_ 0.0733_x000D_ 0.1715_x000D_ 0.0581_x000D_ 0.1468_x000D_ 0.3629	-0.0774_x000D_ -0.0032_x000D_ -0.0095_x000D_ -0.0007_x000D_ 0.0281_x000D_ 0.0729	NA_x000D_ NA_x000D_ NA_x000D_ NA_x000D_ NA_x000D_ NA	1_x000D_ 1_x000D_ 1_x000D_ 2_x000D_ 1_x000D_ 2	1.0_x000D_ 1.0_x000D_ 1.0_x000D_ 0.5433_x000D_ 1.0_x000D_ 0.8871	1.0_x000D_ 1.0_x000D_ 1.0_x000D_ 0.5294_x000D_ 1.0_x000D_ 0.1283	1.0_x000D_ 1.0_x000D_ 1.0_x000D_ -0.0138_x000D_ 1.0_x000D_ -0.7588	NA_x000D_ NA_x000D_ NA_x000D_ NA_x000D_ NA_x000D_ Shortening	CEP350_exon_chr1:179981063	CEP350_exon_chr1:180022884	CEP350_exon_chr1:180044156	CEP350_exon_chr1:180061748	CEP350_exon_chr1:180067997	CEP350_exon_chr1:180080131
NUAK2	5.6532	11.7153	1.0385	0.6315	NC	No	No	1	NUAK2_exon_chr1:205273641	1	1	0	NA	2	NA	NA	NA	NA	NUAK2_exon_chr1:205273641
TCTN1	21.7862	44.6935	1.0384	0.0441	UP	No	No	2	TCTN1_exon_chr12:111066571_x000D_ TCTN1_exon_chr12:111086847	0.2982_x000D_ 0.7018	0.3694_x000D_ 0.6306	0.0712_x000D_ -0.0712	NA_x000D_ NA	1_x000D_ 1	1.0_x000D_ 1.0	1.0_x000D_ 1.0	1.0_x000D_ 1.0	NA_x000D_ NA	TCTN1_exon_chr12:111066571	TCTN1_exon_chr12:111086847
SNX33	4.524	8.8859	1.0381	0.4279	NC	No	Yes	1	SNX33_exon_chr15:75949302	1	1	0	NA	2	NA	NA	NA	Shortening	SNX33_exon_chr15:75949302
STAT4	2.2558	4.3463	1.0363	1	NC	No	No	1	STAT4_exon_chr2:191894592	1	1	0	NA	1	1	1	1	NA	STAT4_exon_chr2:191894592
ADPRH	11.4281	23.8091	1.0362	0.2758	NC	No	No	1	ADPRH_exon_chr3:119306310	1	1	0	NA	1	1	1	1	NA	ADPRH_exon_chr3:119306310
SYTL2	4.0632	8.3171	1.0361	1	NC	No	No	1	SYTL2_exon_chr11:85406383	1	1	0	NA	2	NA	NA	NA	NA	SYTL2_exon_chr11:85406383
ICOSLG	1.9893	3.8893	1.0355	0.7804	NC	No	No	1	ICOSLG_exon_chr21:45648927	1	1	0	NA	2	NA	NA	NA	NA	ICOSLG_exon_chr21:45648927
FAM120C	8.4428	17.223	1.0354	0.2337	NC	No	Yes	2	FAM120C_exon_chrX:54099720_x000D_ FAM120C_exon_chrX:54200579	0.243_x000D_ 0.757	0.1059_x000D_ 0.8941	-0.1372_x000D_ 0.1372	NA_x000D_ NA	3_x000D_ 1	NA_x000D_ 1.0	NA_x000D_ 1.0	NA_x000D_ 1.0	Shortening_x000D_ NA	FAM120C_exon_chrX:54099720	FAM120C_exon_chrX:54200579
LAMB3	143.462	295.557	1.0352	0	UP	No	No	1	LAMB3_exon_chr1:209788752	1	1	0	NA	1	1	1	1	NA	LAMB3_exon_chr1:209788752
HES2	18.2917	36.92	1.0351	0.0965	UP	No	Yes	1	HES2_exon_chr1:6479213	1	1	0	NA	3	0.5462	0.3096	-0.2366	Shortening	HES2_exon_chr1:6479213
DHFR	190.123	390.381	1.0345	0	UP	No	Yes	1	DHFR_exon_chr5:79924984	1	1	0	NA	7	0.5366	0.1807	-0.3558	Both	DHFR_exon_chr5:79924984
PJVK	2.1109	4.3894	1.0344	1	NC	No	No	1	PJVK_exon_chr2:179325708	1	1	0	NA	1	1	1	1	NA	PJVK_exon_chr2:179325708
LOC112268124	3.2519	7.1409	1.0339	0.7859	NC	No	No	1	LOC112268124_exon_chr14:35343396	1	1	0	NA	1	1	1	1	NA	LOC112268124_exon_chr14:35343396
MYO5A	86.5106	175.835	1.0334	0.0002	UP	No	Yes	4	MYO5A_exon_chr15:52606045_x000D_ MYO5A_exon_chr15:52638658_x000D_ MYO5A_exon_chr15:52643678_x000D_ MYO5A_exon_chr15:52659321	0.1554_x000D_ 0.1347_x000D_ 0.5132_x000D_ 0.1967	0.2423_x000D_ 0.1443_x000D_ 0.4695_x000D_ 0.1439	0.087_x000D_ 0.0096_x000D_ -0.0437_x000D_ -0.0528	NA_x000D_ NA_x000D_ NA_x000D_ NA	1_x000D_ 1_x000D_ 5_x000D_ 1	1.0_x000D_ 1.0_x000D_ NA_x000D_ 1.0	1.0_x000D_ 1.0_x000D_ NA_x000D_ 1.0	1.0_x000D_ 1.0_x000D_ NA_x000D_ 1.0	NA_x000D_ NA_x000D_ Both_x000D_ NA	MYO5A_exon_chr15:52606045	MYO5A_exon_chr15:52638658	MYO5A_exon_chr15:52643678	MYO5A_exon_chr15:52659321
AGO1	114.356	234.835	1.0333	0	UP	No	Yes	1	AGO1_exon_chr1:36385099	1	1	0	NA	6	0.292	0.1323	-0.1597	Shortening	AGO1_exon_chr1:36385099
TRPV1	3.1056	6.3919	1.0329	0.5442	NC	No	No	1	TRPV1_exon_chr17:3470281	1	1	0	NA	1	1	1	1	NA	TRPV1_exon_chr17:3470281
SLC35D1	20.6214	42.2976	1.0329	0.0786	UP	No	Yes	1	SLC35D1_exon_chr1:67470131	1	1	0	NA	5	0.8734	0.269	-0.6043	Both	SLC35D1_exon_chr1:67470131
KIAA1324L	42.6985	86.8581	1.0327	0.0045	UP	No	Yes	1	KIAA1324L_exon_chr7:86509846	1	1	0	NA	4	0.8549	0.7348	-0.1201	Shortening	KIAA1324L_exon_chr7:86509846
PHOSPHO1	2.2325	4.8664	1.0326	1	NC	No	No	1	PHOSPHO1_exon_chr17:47302493	1	1	0	NA	2	NA	NA	NA	NA	PHOSPHO1_exon_chr17:47302493
DSC2	136.63	278.17	1.0323	0.0004	UP	No	Yes	2	DSC2_exon_chr18:28648178_x000D_ DSC2_exon_chr18:28672263	0.8525_x000D_ 0.1475	0.8412_x000D_ 0.1588	-0.0113_x000D_ 0.0113	NA_x000D_ NA	1_x000D_ 13	1.0_x000D_ 0.9062	1.0_x000D_ 0.2754	1.0_x000D_ -0.6308	NA_x000D_ Both	DSC2_exon_chr18:28648178	DSC2_exon_chr18:28672263
LOC100506076	10.1534	20.9048	1.0322	0.38	NC	No	No	2	LOC100506076_exon_chr2:97957293_x000D_ LOC100506076_exon_chr2:98082014	0.552_x000D_ 0.448	0.5701_x000D_ 0.4299	0.0181_x000D_ -0.0181	NA_x000D_ NA	2_x000D_ 2	NA_x000D_ NA	NA_x000D_ NA	NA_x000D_ NA	NA_x000D_ NA	LOC100506076_exon_chr2:97957293	LOC100506076_exon_chr2:98082014
STAT2	14.5189	29.6058	1.0317	0.2657	NC	No	No	1	STAT2_exon_chr12:56737315	1	1	0	NA	1	1	1	1	NA	STAT2_exon_chr12:56737315
ATP6V0A1	14.8593	30.0478	1.0299	0.1047	NC	No	No	1	ATP6V0A1_exon_chr17:40673044	1	1	0	NA	1	1	1	1	NA	ATP6V0A1_exon_chr17:40673044
RORA-AS1	1.0194	2.1702	1.0282	1	NC	No	No	1	RORA-AS1_exon_chr15:60821740	1	1	0	NA	1	1	1	1	NA	RORA-AS1_exon_chr15:60821740
MAML3	0.8978	1.9738	1.0279	0.8061	NC	No	No	1	MAML3_exon_chr4:140641477	1	1	0	NA	1	1	1	1	NA	MAML3_exon_chr4:140641477
FAM3C	1046.85	2133.52	1.0278	0	UP	No	Yes	1	FAM3C_exon_chr7:120990604	1	1	0	NA	7	0.5758	0.0928	-0.483	Shortening	FAM3C_exon_chr7:120990604
LIX1L	26.5998	53.2938	1.0267	0.0781	UP	No	Yes	1	LIX1L_exon_chr1:145498535	1	1	0	NA	4	0.7498	0.4487	-0.3011	Shortening	LIX1L_exon_chr1:145498535
CADPS2	11.0022	22.1821	1.0249	0.3146	NC	No	No	1	CADPS2_exon_chr7:121960392	1	1	0	NA	2	NA	NA	NA	NA	CADPS2_exon_chr7:121960392
LONRF1	12.508	25.9011	1.0235	0.2265	NC	No	Yes	1	LONRF1_exon_chr8:12580763	1	1	0	NA	5	NA	NA	NA	Shortening	LONRF1_exon_chr8:12580763
C5orf66	1.4191	2.78	1.0232	1	NC	No	No	1	C5orf66_exon_chr5:134678844	1	1	0	NA	1	1	1	1	NA	C5orf66_exon_chr5:134678844
PKNOX1	19.0674	38.1077	1.0232	0.0652	UP	No	No	1	PKNOX1_exon_chr21:44449999	1	1	0	NA	4	0.1836	0.117	-0.0665	NA	PKNOX1_exon_chr21:44449999
ATP8B5P	7.7511	15.4197	1.0231	0.3621	NC	No	No	1	ATP8B5P_exon_chr9:35449465	1	1	0	NA	2	NA	NA	NA	NA	ATP8B5P_exon_chr9:35449465
ASXL1	53.1913	107.659	1.0224	0.0008	UP	Yes	Yes	2	ASXL1_exon_chr20:30959966_x000D_ ASXL1_exon_chr20:31022234	0.2489_x000D_ 0.7511	0.4673_x000D_ 0.5193	0.2184_x000D_ -0.2318	Up_x000D_ NA	1_x000D_ 4	1.0_x000D_ 0.6389	1.0_x000D_ 0.1235	1.0_x000D_ -0.5154	NA_x000D_ Shortening	ASXL1_exon_chr20:30959966	ASXL1_exon_chr20:31022234
RNF215	3.2868	6.3893	1.0221	0.6526	NC	No	No	1	RNF215_exon_chr22:30775611	1	1	0	NA	1	1	1	1	NA	RNF215_exon_chr22:30775611
MKLN1	43.1739	88.2688	1.0207	0.0051	UP	No	Yes	1	MKLN1_exon_chr7:131172365	1	1	0	NA	7	0.7001	0.1077	-0.5924	Shortening	MKLN1_exon_chr7:131172365
ALG9	19.9316	41.0469	1.0206	0.0828	UP	No	No	1	ALG9_exon_chr11:111657244	1	1	0	NA	2	0.0621	0.0444	-0.0177	NA	ALG9_exon_chr11:111657244
CYRIB	138.941	281.345	1.0203	0	UP	No	No	1	CYRIB_exon_chr8:130854451	1	1	0	NA	1	1	1	1	NA	CYRIB_exon_chr8:130854451
ZNF658B	2.4385	5.0862	1.0197	1	NC	No	No	1	ZNF658B_exon_chr9:41592470	1	1	0	NA	1	1	1	1	NA	ZNF658B_exon_chr9:41592470
NUTM2E	1.9172	4.1181	1.019	1	NC	No	No	1	NUTM2E_exon_chr10:81609576	1	1	0	NA	1	1	1	1	NA	NUTM2E_exon_chr10:81609576
RFTN1	4.3544	8.7996	1.0187	0.742	NC	No	No	1	RFTN1_exon_chr3:16358739	1	1	0	NA	1	1	1	1	NA	RFTN1_exon_chr3:16358739
ZNF337-AS1	3.9676	8.2961	1.0187	0.631	NC	No	No	1	ZNF337-AS1_exon_chr20:25657571	1	1	0	NA	1	1	1	1	NA	ZNF337-AS1_exon_chr20:25657571
SLC25A20	25.633	52.6198	1.0185	0.0257	UP	No	No	1	SLC25A20_exon_chr3:48895205	1	1	0	NA	1	1	1	1	NA	SLC25A20_exon_chr3:48895205
SLC7A1	103.917	211.861	1.0185	0.0019	UP	No	Yes	1	SLC7A1_exon_chr13:30088720	1	1	0	NA	7	0.8026	0.4691	-0.3334	Shortening	SLC7A1_exon_chr13:30088720
ADIRF	389.08	787.528	1.0181	0	UP	No	No	1	ADIRF_exon_chr10:88730092	1	1	0	NA	1	1	1	1	NA	ADIRF_exon_chr10:88730092
SEMA3G	4.4046	9.3047	1.017	0.7285	NC	No	No	1	SEMA3G_exon_chr3:52470089	1	1	0	NA	1	1	1	1	NA	SEMA3G_exon_chr3:52470089
DUSP19	1.4075	2.9417	1.0168	1	NC	No	No	1	DUSP19_exon_chr2:183960158	1	1	0	NA	2	NA	NA	NA	NA	DUSP19_exon_chr2:183960158
JUND	135.537	274.159	1.0159	0	UP	No	Yes	1	JUND_exon_chr19:18392432	1	1	0	NA	3	0.8692	0.7094	-0.1598	Both	JUND_exon_chr19:18392432
PRELID2	39.2279	79.1377	1.0146	0.0248	UP	No	Yes	1	PRELID2_exon_chr5:145140088	1	1	0	NA	3	0.2918	0.0415	-0.2503	Shortening	PRELID2_exon_chr5:145140088
SH3TC2	3.6626	7.1436	1.0129	0.6539	NC	No	No	1	SH3TC2_exon_chr5:148384465	1	1	0	NA	1	1	1	1	NA	SH3TC2_exon_chr5:148384465
LINC01023	4.3667	8.6316	1.0129	0.5699	NC	No	No	1	LINC01023_exon_chr5:108063962	1	1	0	NA	1	1	1	1	NA	LINC01023_exon_chr5:108063962
TRMT10B	3.846	8.0279	1.0123	0.5997	NC	No	Yes	1	TRMT10B_exon_chr9:37777597	1	1	0	NA	2	NA	NA	NA	Shortening	TRMT10B_exon_chr9:37777597
IER3IP1	294.89	594.429	1.0117	0	UP	No	Yes	1	IER3IP1_exon_chr18:44682603	1	1	0	NA	2	0.7059	0.1252	-0.5807	Shortening	IER3IP1_exon_chr18:44682603
GSTCD	30.0623	61.421	1.01	0.0388	UP	No	Yes	1	GSTCD_exon_chr4:106766597	1	1	0	NA	3	0.901	0.612	-0.289	Shortening	GSTCD_exon_chr4:106766597
CCNG2	26.0903	52.1722	1.0099	0.3178	NC	No	Yes	1	CCNG2_exon_chr4:78086953	1	1	0	NA	4	0.2339	0.1566	-0.0773	Both	CCNG2_exon_chr4:78086953
ANXA10	5.7262	11.7295	1.0095	1	NC	No	No	1	ANXA10_exon_chr4:169108516	1	1	0	NA	1	1	1	1	NA	ANXA10_exon_chr4:169108516
LCMT1-AS1	0.7398	1.3754	1.0088	1	NC	No	No	1	LCMT1-AS1_exon_chr16:25112006	1	1	0	NA	1	1	1	1	NA	LCMT1-AS1_exon_chr16:25112006
NUP58	121.982	244.224	1.0088	0	UP	No	Yes	1	NUP58_exon_chr13:25914102	1	1	0	NA	6	0.8214	0.3529	-0.4685	Shortening	NUP58_exon_chr13:25914102
C21orf58	10.8194	21.2487	1.008	0.3047	NC	No	No	1	C21orf58_exon_chr21:47722068	1	1	0	NA	2	NA	NA	NA	NA	C21orf58_exon_chr21:47722068
C14orf132	10.4444	20.9482	1.0074	0.3024	NC	No	No	1	C14orf132_exon_chr14:96552847	1	1	0	NA	3	NA	NA	NA	NA	C14orf132_exon_chr14:96552847
OXR1	51.5147	102.848	1.0066	0.0081	UP	No	Yes	2	OXR1_exon_chr8:107718609_x000D_ OXR1_exon_chr8:107763033	0.2233_x000D_ 0.7767	0.1929_x000D_ 0.8071	-0.0304_x000D_ 0.0304	NA_x000D_ NA	5_x000D_ 1	0.8544_x000D_ 1.0	0.1569_x000D_ 1.0	-0.6974_x000D_ 1.0	Shortening_x000D_ NA	OXR1_exon_chr8:107718609	OXR1_exon_chr8:107763033
PLEKHB2	98.9022	199.315	1.0056	0	UP	No	Yes	1	PLEKHB2_exon_chr2:131904209	1	1	0	NA	5	0.9307	0.2771	-0.6536	Both	PLEKHB2_exon_chr2:131904209
SIM2	9.2679	18.6215	1.0054	0.435	NC	No	Yes	1	SIM2_exon_chr21:38119965	1	1	0	NA	3	NA	NA	NA	Shortening	SIM2_exon_chr21:38119965
LRIG3	4.4773	9.3655	1.0053	0.6796	NC	No	No	1	LRIG3_exon_chr12:59266598	1	1	0	NA	2	NA	NA	NA	NA	LRIG3_exon_chr12:59266598
DPH6	13.43	27.9154	1.0053	0.1571	NC	No	No	1	DPH6_exon_chr15:35664565	1	1	0	NA	1	1	1	1	NA	DPH6_exon_chr15:35664565
MAGI3	16.0244	32.2991	1.0053	0.1017	NC	No	Yes	2	MAGI3_exon_chr1:114186364_x000D_ MAGI3_exon_chr1:114224833	0.0917_x000D_ 0.9083	0.1246_x000D_ 0.8754	0.0329_x000D_ -0.0329	NA_x000D_ NA	4_x000D_ 1	0.3995_x000D_ 1.0	0.1763_x000D_ 1.0	-0.2232_x000D_ 1.0	Shortening_x000D_ NA	MAGI3_exon_chr1:114186364	MAGI3_exon_chr1:114224833
MLEC	568.55	1142.86	1.0051	0	UP	No	Yes	1	MLEC_exon_chr12:121134118	1	1	0	NA	3	0.4482	0.1576	-0.2906	Shortening	MLEC_exon_chr12:121134118
GBE1	43.1852	86.6682	1.0042	0.0065	UP	No	Yes	1	GBE1_exon_chr3:81539614	1	1	0	NA	4	0.5029	0.2569	-0.246	Shortening	GBE1_exon_chr3:81539614
CD47	103.251	205.577	1.0036	0	UP	No	No	1	CD47_exon_chr3:107766139	1	1	0	NA	1	1	1	1	NA	CD47_exon_chr3:107766139
FAM72A	93.6002	187.842	1.0026	0.0019	UP	No	Yes	1	FAM72A_exon_chr1:206153956	1	1	0	NA	4	0.7771	0.1172	-0.66	Shortening	FAM72A_exon_chr1:206153956
SMAD2	68.8514	137.885	1.0026	0.0015	UP	No	Yes	1	SMAD2_exon_chr18:45368321	1	1	0	NA	10	0.1619	0.0388	-0.1231	Both	SMAD2_exon_chr18:45368321
DDX58	36.3874	71.93	1.0022	0.0395	UP	Yes	No	2	DDX58_exon_chr9:32457416_x000D_ DDX58_exon_chr9:32466439	0.6253_x000D_ 0.3747	0.8273_x000D_ 0.1727	0.202_x000D_ -0.202	Up_x000D_ NA	2_x000D_ 1	NA_x000D_ 1.0	NA_x000D_ 1.0	NA_x000D_ 1.0	NA_x000D_ NA	DDX58_exon_chr9:32457416	DDX58_exon_chr9:32466439
CCDC50	288.855	578.215	1.0011	0	UP	No	No	1	CCDC50_exon_chr3:191109529	1	1	0	NA	1	1	1	1	NA	CCDC50_exon_chr3:191109529
ZNF490	3.3247	7.0653	0.9997	0.571	NC	No	No	1	ZNF490_exon_chr19:12692538	1	1	0	NA	3	NA	NA	NA	NA	ZNF490_exon_chr19:12692538
CCDC32	11.3786	22.7776	0.9991	0.2988	NC	No	No	2	CCDC32_exon_chr15:40824749_x000D_ CCDC32_exon_chr15:40846326	0.0681_x000D_ 0.9319	0.26_x000D_ 0.74	0.1919_x000D_ -0.1919	NA_x000D_ NA	2_x000D_ 2	NA_x000D_ NA	NA_x000D_ NA	NA_x000D_ NA	NA_x000D_ NA	CCDC32_exon_chr15:40824749	CCDC32_exon_chr15:40846326
MBD4	29.0296	58.3382	0.999	0.026	UP	No	No	2	MBD4_exon_chr3:129150421_x000D_ MBD4_exon_chr3:129156151	0.7817_x000D_ 0.2183	0.7247_x000D_ 0.2753	-0.057_x000D_ 0.057	NA_x000D_ NA	2_x000D_ 2	0.4879_x000D_ NA	0.5113_x000D_ NA	0.0233_x000D_ NA	NA_x000D_ NA	MBD4_exon_chr3:129150421	MBD4_exon_chr3:129156151
UHRF1BP1L	39.9213	79.5149	0.9977	0.0067	UP	Yes	Yes	3	UHRF1BP1L_exon_chr12:100431533_x000D_ UHRF1BP1L_exon_chr12:100451524_x000D_ UHRF1BP1L_exon_chr12:100463947	0.423_x000D_ 0.3583_x000D_ 0.209	0.7034_x000D_ 0.2272_x000D_ 0.0473	0.2804_x000D_ -0.1311_x000D_ -0.1618	Up_x000D_ NA_x000D_ NA	1_x000D_ 3_x000D_ 1	1.0_x000D_ 0.8825_x000D_ 1.0	1.0_x000D_ 0.1235_x000D_ 1.0	1.0_x000D_ NA_x000D_ 1.0	NA_x000D_ Shortening_x000D_ NA	UHRF1BP1L_exon_chr12:100431533	UHRF1BP1L_exon_chr12:100451524	UHRF1BP1L_exon_chr12:100463947
WWC3	7.6791	15.6943	0.9973	0.2764	NC	No	No	2	WWC3_exon_chrX:10047764_x000D_ WWC3_exon_chrX:10109474	0.0_x000D_ 1.0	0.1831_x000D_ 0.8169	0.1831_x000D_ -0.1831	NA_x000D_ NA	2_x000D_ 1	NA_x000D_ 1.0	NA_x000D_ 1.0	NA_x000D_ 1.0	NA_x000D_ NA	WWC3_exon_chrX:10047764	WWC3_exon_chrX:10109474
ATG2A	11.317	22.4075	0.9969	0.2593	NC	No	No	1	ATG2A_exon_chr11:64662681	1	1	0	NA	1	1	1	1	NA	ATG2A_exon_chr11:64662681
ZNF782	6.635	13.134	0.9968	0.4144	NC	No	No	1	ZNF782_exon_chr9:99582060	1	1	0	NA	4	NA	NA	NA	NA	ZNF782_exon_chr9:99582060
DGLUCY	46.4134	93.0152	0.9963	0.0065	UP	No	No	2	DGLUCY_exon_chr14:91633812_x000D_ DGLUCY_exon_chr14:91691027	0.0823_x000D_ 0.9177	0.1678_x000D_ 0.8322	0.0855_x000D_ -0.0855	NA_x000D_ NA	1_x000D_ 1	1.0_x000D_ 1.0	1.0_x000D_ 1.0	1.0_x000D_ 1.0	NA_x000D_ NA	DGLUCY_exon_chr14:91633812	DGLUCY_exon_chr14:91691027
GPATCH11	110.383	221.078	0.9944	0.0049	UP	Yes	Yes	3	GPATCH11_exon_chr2:37319058_x000D_ GPATCH11_exon_chr2:37321224_x000D_ GPATCH11_exon_chr2:37323350	0.7648_x000D_ 0.0807_x000D_ 0.1545	0.6327_x000D_ 0.0791_x000D_ 0.2882	-0.1321_x000D_ -0.0016_x000D_ 0.1337	NA_x000D_ NA_x000D_ Up	3_x000D_ 1_x000D_ 1	0.6541_x000D_ 1.0_x000D_ 1.0	0.1156_x000D_ 1.0_x000D_ 1.0	-0.5384_x000D_ 1.0_x000D_ 1.0	Both_x000D_ NA_x000D_ NA	GPATCH11_exon_chr2:37319058	GPATCH11_exon_chr2:37321224	GPATCH11_exon_chr2:37323350
MAFG-DT	20.391	40.4978	0.9941	0.1717	NC	No	No	1	MAFG-DT_exon_chr17:79887351	1	1	0	NA	1	1	1	1	NA	MAFG-DT_exon_chr17:79887351
TMEM238	18.3181	36.983	0.9938	0.0715	UP	No	No	1	TMEM238_exon_chr19:55890735	1	1	0	NA	1	1	1	1	NA	TMEM238_exon_chr19:55890735
NGEF	10.8333	22.1305	0.9934	0.2399	NC	No	No	1	NGEF_exon_chr2:233744389	1	1	0	NA	1	1	1	1	NA	NGEF_exon_chr2:233744389
CLCN4	1.5407	3.1355	0.9931	1	NC	No	No	1	CLCN4_exon_chrX:10201533	1	1	0	NA	2	NA	NA	NA	NA	CLCN4_exon_chrX:10201533
CEP76	26.3825	52.2619	0.991	0.0652	UP	No	Yes	2	CEP76_exon_chr18:12662168_x000D_ CEP76_exon_chr18:12673502	0.0294_x000D_ 0.9706	0.6698_x000D_ 0.3302	0.6404_x000D_ -0.6404	Up_x000D_ NA	2_x000D_ 2	0.6152_x000D_ NA	0.2402_x000D_ NA	-0.375_x000D_ NA	Shortening_x000D_ NA	CEP76_exon_chr18:12662168	CEP76_exon_chr18:12673502
PMAIP1	503.65	1000.96	0.9895	0	UP	No	Yes	1	PMAIP1_exon_chr18:57569878	1	1	0	NA	9	0.6677	0.3512	-0.3165	Both	PMAIP1_exon_chr18:57569878
INPP5J	4.5006	8.8859	0.9894	0.6367	NC	No	No	1	INPP5J_exon_chr22:31529898	1	1	0	NA	1	1	1	1	NA	INPP5J_exon_chr22:31529898
SENP2	55.9459	110.955	0.9887	0.0002	UP	No	Yes	2	SENP2_exon_chr3:185332351_x000D_ SENP2_exon_chr3:185347569	0.149_x000D_ 0.851	0.0681_x000D_ 0.9319	-0.0809_x000D_ 0.0809	NA_x000D_ NA	1_x000D_ 3	1.0_x000D_ 0.3277	1.0_x000D_ 0.0841	1.0_x000D_ -0.2437	NA_x000D_ Shortening	SENP2_exon_chr3:185332351	SENP2_exon_chr3:185347569
ASAH2	5.689	11.007	0.9881	0.4127	NC	No	Yes	1	ASAH2_exon_chr10:51947264	1	1	0	NA	2	NA	NA	NA	Shortening	ASAH2_exon_chr10:51947264
ARNTL2	33.2503	66.4389	0.9874	0.0232	UP	No	Yes	1	ARNTL2_exon_chr12:27573328	1	1	0	NA	5	0.5499	0.2317	-0.3182	Shortening	ARNTL2_exon_chr12:27573328
CTC1	45.4769	90.4968	0.9862	0.0135	UP	No	Yes	1	CTC1_exon_chr17:8131637	1	1	0	NA	5	0.2176	0.09	-0.1277	Shortening	CTC1_exon_chr17:8131637
ENC1	59.0145	116.752	0.9861	0.0535	UP	No	Yes	1	ENC1_exon_chr5:73925817	1	1	0	NA	4	0.6191	0.3566	-0.2624	Both	ENC1_exon_chr5:73925817
LYPD5	1.4075	2.8868	0.9847	1	NC	No	No	1	LYPD5_exon_chr19:44301981	1	1	0	NA	2	NA	NA	NA	NA	LYPD5_exon_chr19:44301981
PMS2CL	19.7734	39.0342	0.9846	0.099	UP	No	No	1	PMS2CL_exon_chr7:6790879	1	1	0	NA	1	1	1	1	NA	PMS2CL_exon_chr7:6790879
LOC401357	6.7572	13.6195	0.9819	0.3829	NC	No	No	1	LOC401357_exon_chr7:56880429	1	1	0	NA	1	1	1	1	NA	LOC401357_exon_chr7:56880429
ETFDH	14.7777	30.1987	0.9819	0.2644	NC	No	No	1	ETFDH_exon_chr4:159629515	1	1	0	NA	1	1	1	1	NA	ETFDH_exon_chr4:159629515
PEX3	22.8819	46.093	0.9813	0.1013	NC	No	Yes	1	PEX3_exon_chr6:143810279	1	1	0	NA	3	NA	NA	NA	Shortening	PEX3_exon_chr6:143810279
OPN3	6.3308	12.4173	0.9811	0.9585	NC	No	Yes	1	OPN3_exon_chr1:241757993	1	1	0	NA	2	NA	NA	NA	Shortening	OPN3_exon_chr1:241757993
TRIM36	7.8005	15.4106	0.9807	0.4719	NC	No	Yes	1	TRIM36_exon_chr5:114462554	1	1	0	NA	3	NA	NA	NA	Shortening	TRIM36_exon_chr5:114462554
MLF1	36.3269	70.5829	0.9793	0.0329	UP	No	Yes	1	MLF1_exon_chr3:158322885	1	1	0	NA	3	0.4274	0.1518	-0.2756	Shortening	MLF1_exon_chr3:158322885
H4C12	0.5097	1.1385	0.9792	1	NC	No	No	1	H4C12_exon_chr6:27799338	1	1	0	NA	2	NA	NA	NA	NA	H4C12_exon_chr6:27799338
RFX1	11.9735	23.8438	0.9788	0.2898	NC	No	No	1	RFX1_exon_chr19:14073676	1	1	0	NA	2	NA	NA	NA	NA	RFX1_exon_chr19:14073676
LINC01145	3.4689	6.5684	0.9749	0.6097	NC	No	No	1	LINC01145_exon_chr1:149672300	1	1	0	NA	2	NA	NA	NA	NA	LINC01145_exon_chr1:149672300
BLACAT1	1.4191	2.6412	0.9737	1	NC	No	No	1	BLACAT1_exon_chr1:205406459	1	1	0	NA	2	NA	NA	NA	NA	BLACAT1_exon_chr1:205406459
ARV1	5.0818	9.8258	0.9731	0.7013	NC	No	Yes	1	ARV1_exon_chr1:231135883	1	1	0	NA	2	NA	NA	NA	Shortening	ARV1_exon_chr1:231135883
PLEKHO2	4.5742	9.5074	0.973	0.5905	NC	No	No	1	PLEKHO2_exon_chr15:65157097	1	1	0	NA	1	1	1	1	NA	PLEKHO2_exon_chr15:65157097
SFXN3	23.509	45.9756	0.9728	0.0389	UP	No	No	1	SFXN3_exon_chr10:102799245	1	1	0	NA	1	1	1	1	NA	SFXN3_exon_chr10:102799245
HIPK2	48.061	94.182	0.9722	0.001	UP	No	Yes	1	HIPK2_exon_chr7:139258143	1	1	0	NA	3	0.9722	0.8163	-0.1559	Both	HIPK2_exon_chr7:139258143
SPC24	95.2348	186.387	0.9713	0.0006	UP	No	Yes	1	SPC24_exon_chr19:11257965	1	1	0	NA	2	0.3777	0.2137	-0.164	Shortening	SPC24_exon_chr19:11257965
MAPK1	157.45	307.977	0.9699	0	UP	Yes	Yes	2	MAPK1_exon_chr22:22118529_x000D_ MAPK1_exon_chr22:22123609	0.9133_x000D_ 0.0867	0.2967_x000D_ 0.7033	-0.6166_x000D_ 0.6166	Down_x000D_ Up	1_x000D_ 5	1.0_x000D_ 0.6472	1.0_x000D_ 0.2331	1.0_x000D_ -0.4142	NA_x000D_ Shortening	MAPK1_exon_chr22:22118529	MAPK1_exon_chr22:22123609
SNAPC3	47.6988	94.0937	0.9698	0.0051	UP	No	No	1	SNAPC3_exon_chr9:15459716	1	1	0	NA	11	0.4878	0.3402	-0.1476	NA	SNAPC3_exon_chr9:15459716
METTL4	14.059	27.1835	0.9686	0.1854	NC	No	Yes	2	METTL4_exon_chr18:2539144_x000D_ METTL4_exon_chr18:2567653	0.8203_x000D_ 0.1797	0.8032_x000D_ 0.1968	-0.0171_x000D_ 0.0171	NA_x000D_ NA	4_x000D_ 1	NA_x000D_ 1.0	NA_x000D_ 1.0	NA_x000D_ 1.0	Both_x000D_ NA	METTL4_exon_chr18:2539144	METTL4_exon_chr18:2567653
TEAD2	8.6243	16.8275	0.9677	0.5869	NC	No	No	1	TEAD2_exon_chr19:49844694	1	1	0	NA	2	NA	NA	NA	NA	TEAD2_exon_chr19:49844694
ELAC1	10.0083	19.595	0.9667	0.3649	NC	No	No	1	ELAC1_exon_chr18:48512988	1	1	0	NA	1	1	1	1	NA	ELAC1_exon_chr18:48512988
NADK	81.1056	158.859	0.9666	0.0012	UP	No	Yes	1	NADK_exon_chr1:1684499	1	1	0	NA	3	0.6939	0.353	-0.3409	Shortening	NADK_exon_chr1:1684499
LTB4R2	0.5097	1.1067	0.966	1	NC	No	No	1	LTB4R2_exon_chr14:24779804	1	1	0	NA	1	1	1	1	NA	LTB4R2_exon_chr14:24779804
ITGB1BP2	3.9429	7.8515	0.9654	0.6339	NC	No	No	1	ITGB1BP2_exon_chrX:70524814	1	1	0	NA	1	1	1	1	NA	ITGB1BP2_exon_chrX:70524814
VPS36	94.1568	182.787	0.9639	0	UP	No	Yes	2	VPS36_exon_chr13:52990058_x000D_ VPS36_exon_chr13:53009017	0.8541_x000D_ 0.1459	0.907_x000D_ 0.093	0.053_x000D_ -0.053	NA_x000D_ NA	12_x000D_ 1	0.642_x000D_ 1.0	0.1813_x000D_ 1.0	-0.4606_x000D_ 1.0	Both_x000D_ NA	VPS36_exon_chr13:52990058	VPS36_exon_chr13:53009017
NEMP2	5.4582	10.3162	0.9609	0.5053	NC	No	No	1	NEMP2_exon_chr2:191374038	1	1	0	NA	2	NA	NA	NA	NA	NEMP2_exon_chr2:191374038
TULP4	22.6366	44.2416	0.9608	0.0715	UP	No	Yes	1	TULP4_exon_chr6:158927609	1	1	0	NA	3	0.9244	0.3069	-0.6175	Shortening	TULP4_exon_chr6:158927609
MOK	1.6376	3.0919	0.9605	1	NC	No	No	2	MOK_exon_chr14:102691131_x000D_ MOK_exon_chr14:102695703	0.2366_x000D_ 0.7634	0.8908_x000D_ 0.1092	0.6542_x000D_ -0.6542	NA_x000D_ NA	1_x000D_ 1	1.0_x000D_ 1.0	1.0_x000D_ 1.0	1.0_x000D_ 1.0	NA_x000D_ NA	MOK_exon_chr14:102691131	MOK_exon_chr14:102695703
CYB5R1	14.338	27.8662	0.9605	0.1782	NC	No	No	1	CYB5R1_exon_chr1:202931827	1	1	0	NA	2	1	0.9656	-0.0344	NA	CYB5R1_exon_chr1:202931827
TRIML2	15.8404	30.0418	0.9598	0.1584	NC	No	No	1	TRIML2_exon_chr4:189013095	1	1	0	NA	1	1	1	1	NA	TRIML2_exon_chr4:189013095
AMOTL2	25.6222	50.8536	0.9588	0.0587	UP	No	Yes	1	AMOTL2_exon_chr3:134076605	1	1	0	NA	3	0.4633	0.2265	-0.2369	Shortening	AMOTL2_exon_chr3:134076605
TIGD3	3.166	6.2565	0.9585	1	NC	No	No	1	TIGD3_exon_chr11:65123263	1	1	0	NA	1	1	1	1	NA	TIGD3_exon_chr11:65123263
SPATC1L	1.516	2.7713	0.9565	1	NC	No	No	1	SPATC1L_exon_chr21:47581619	1	1	0	NA	1	1	1	1	NA	SPATC1L_exon_chr21:47581619
KIF2C	131.218	255.137	0.956	0	UP	No	Yes	1	KIF2C_exon_chr1:45232768	1	1	0	NA	2	0.8277	0.4676	-0.3601	Shortening	KIF2C_exon_chr1:45232768
PIGN	9.366	18.422	0.9537	0.4924	NC	No	Yes	1	PIGN_exon_chr18:59713212	1	1	0	NA	2	NA	NA	NA	Shortening	PIGN_exon_chr18:59713212
DCUN1D4	101.751	197.322	0.9529	0	UP	No	Yes	1	DCUN1D4_exon_chr4:52779694	1	1	0	NA	5	0.2306	0.0479	-0.1827	Shortening	DCUN1D4_exon_chr4:52779694
TNFRSF10A	68.1262	132.277	0.9526	0.008	UP	No	Yes	1	TNFRSF10A_exon_chr8:23049526	1	1	0	NA	4	0.7952	0.6271	-0.1681	Shortening	TNFRSF10A_exon_chr8:23049526
HACL1	23.2926	45.8199	0.9524	0.0733	UP	No	No	1	HACL1_exon_chr3:15602404	1	1	0	NA	2	0.9339	0.8942	-0.0397	NA	HACL1_exon_chr3:15602404
GABARAPL1	64.8579	124.648	0.9524	0.0145	UP	No	Yes	1	GABARAPL1_exon_chr12:10374385	1	1	0	NA	2	0.5213	0.3556	-0.1658	Shortening	GABARAPL1_exon_chr12:10374385
GOLPH3L	33.2764	65.4067	0.9522	0.0174	UP	No	Yes	2	GOLPH3L_exon_chr1:150621224_x000D_ GOLPH3L_exon_chr1:150667326	0.9064_x000D_ 0.0936	0.8708_x000D_ 0.1292	-0.0355_x000D_ 0.0355	NA_x000D_ NA	1_x000D_ 5	1.0_x000D_ 0.7537	1.0_x000D_ 0.5493	1.0_x000D_ -0.2045	NA_x000D_ Shortening	GOLPH3L_exon_chr1:150621224	GOLPH3L_exon_chr1:150667326
KCNH3	1.4796	2.6585	0.9519	1	NC	No	No	1	KCNH3_exon_chr12:49951136	1	1	0	NA	1	1	1	1	NA	KCNH3_exon_chr12:49951136
ALG14	15.3077	28.9206	0.9518	0.1709	NC	No	Yes	1	ALG14_exon_chr1:95448862	1	1	0	NA	4	NA	NA	NA	Shortening	ALG14_exon_chr1:95448862
CDKAL1	30.6556	59.943	0.9514	0.059	UP	No	No	1	CDKAL1_exon_chr6:21231078	1	1	0	NA	1	1	1	1	NA	CDKAL1_exon_chr6:21231078
RBM24	7.4352	14.041	0.9511	0.54	NC	No	Yes	1	RBM24_exon_chr6:17291986	1	1	0	NA	3	NA	NA	NA	Shortening	RBM24_exon_chr6:17291986
EIF2AK3	8.4792	16.2577	0.9505	0.3037	NC	No	No	1	EIF2AK3_exon_chr2:88857454	1	1	0	NA	1	1	1	1	NA	EIF2AK3_exon_chr2:88857454
TUFT1	14.2062	28.0569	0.9498	0.2593	NC	No	No	1	TUFT1_exon_chr1:151554119	1	1	0	NA	1	1	1	1	NA	TUFT1_exon_chr1:151554119
PLEKHG5	9.8015	18.8239	0.9493	0.3474	NC	No	No	1	PLEKHG5_exon_chr1:6527632	1	1	0	NA	1	1	1	1	NA	PLEKHG5_exon_chr1:6527632
RTL5	4.0878	7.7418	0.9488	0.697	NC	No	No	1	RTL5_exon_chrX:71347560	1	1	0	NA	1	1	1	1	NA	RTL5_exon_chrX:71347560
KCTD7	2.8507	5.5831	0.9481	0.6814	NC	No	No	1	KCTD7_exon_chr7:66103842	1	1	0	NA	2	NA	NA	NA	NA	KCTD7_exon_chr7:66103842
ZNF75D	6.3078	11.9751	0.948	0.5798	NC	No	No	1	ZNF75D_exon_chrX:134421778	1	1	0	NA	1	1	1	1	NA	ZNF75D_exon_chrX:134421778
FAM91A1	163.242	315.905	0.9478	0	UP	Yes	Yes	2	FAM91A1_exon_chr8:124822521_x000D_ FAM91A1_exon_chr8:124824758	0.0376_x000D_ 0.9624	0.6894_x000D_ 0.3106	0.6518_x000D_ -0.6518	Up_x000D_ Down	4_x000D_ 1	0.8493_x000D_ 1.0	0.5205_x000D_ 1.0	-0.3288_x000D_ 1.0	Shortening_x000D_ NA	FAM91A1_exon_chr8:124822521	FAM91A1_exon_chr8:124824758
TMEM254	8.4917	16.5149	0.9462	0.2654	NC	No	No	1	TMEM254_exon_chr10:81850552	1	1	0	NA	2	NA	NA	NA	NA	TMEM254_exon_chr10:81850552
FGF7P6	5.7865	11.1197	0.9461	0.7029	NC	No	No	1	FGF7P6_exon_chr9:46745367	1	1	0	NA	1	1	1	1	NA	FGF7P6_exon_chr9:46745367
PADI3	1.8677	3.4678	0.9459	1	NC	No	No	1	PADI3_exon_chr1:17609340	1	1	0	NA	1	1	1	1	NA	PADI3_exon_chr1:17609340
ZNF747	7.2299	14.1371	0.9456	0.5311	NC	No	No	1	ZNF747_exon_chr16:30544472	1	1	0	NA	3	NA	NA	NA	NA	ZNF747_exon_chr16:30544472
FOXO3B	5.97	12.4002	0.9452	0.5673	NC	No	No	1	FOXO3B_exon_chr17:18576368	1	1	0	NA	4	NA	NA	NA	NA	FOXO3B_exon_chr17:18576368
SNAR-D	1.5291	3.2365	0.9448	1	NC	No	No	1	SNAR-D_exon_chr19:50643577	1	1	0	NA	1	1	1	1	NA	SNAR-D_exon_chr19:50643577
CLN3	18.1229	34.8014	0.9443	0.0662	UP	No	No	1	CLN3_exon_chr16:28488956	1	1	0	NA	1	1	1	1	NA	CLN3_exon_chr16:28488956
DDIT4L	12.1406	22.835	0.9442	0.4033	NC	No	Yes	1	DDIT4L_exon_chr4:101109324	1	1	0	NA	2	NA	NA	NA	Shortening	DDIT4L_exon_chr4:101109324
SNORA19	4.7556	9.432	0.9437	0.5365	NC	No	No	1	SNORA19_exon_chr10:120819650	1	1	0	NA	1	1	1	1	NA	SNORA19_exon_chr10:120819650
APBB2	73.7053	141.81	0.9436	0.0004	UP	No	Yes	1	APBB2_exon_chr4:40818276	1	1	0	NA	9	0.5023	0.0983	-0.404	Both	APBB2_exon_chr4:40818276
MARCHF6	89.6462	172.931	0.9422	0.0001	UP	No	Yes	1	MARCHF6_exon_chr5:10433705	1	1	0	NA	10	0.6641	0.1361	-0.5279	Both	MARCHF6_exon_chr5:10433705
DDIT3	83.917	160.761	0.9419	0.0042	UP	No	No	1	DDIT3_exon_chr12:57910963	1	1	0	NA	2	0.8532	0.8517	-0.0015	NA	DDIT3_exon_chr12:57910963
SF3A2	1.4796	2.699	0.9412	1	NC	No	No	1	SF3A2_exon_chr19:2247765	1	1	0	NA	1	1	1	1	NA	SF3A2_exon_chr19:2247765
C1orf112	25.8651	50.3158	0.9411	0.1007	NC	No	Yes	1	C1orf112_exon_chr1:169820957	1	1	0	NA	2	NA	NA	NA	Shortening	C1orf112_exon_chr1:169820957
GSK3B	122.226	234.303	0.9389	0	UP	No	Yes	1	GSK3B_exon_chr3:119545702	1	1	0	NA	5	0.2755	0.0262	-0.2493	Shortening	GSK3B_exon_chr3:119545702
FAM117A	19.7107	37.1887	0.9386	0.2311	NC	No	No	1	FAM117A_exon_chr17:47788917	1	1	0	NA	1	1	1	1	NA	FAM117A_exon_chr17:47788917
DOCK9	57.5588	109.902	0.9375	0.0087	UP	No	Yes	1	DOCK9_exon_chr13:99447002	1	1	0	NA	3	0.9285	0.3478	-0.5807	Shortening	DOCK9_exon_chr13:99447002
CATIP-AS1	3.6263	6.7593	0.9371	0.8771	NC	No	No	1	CATIP-AS1_exon_chr2:219231521	1	1	0	NA	1	1	1	1	NA	CATIP-AS1_exon_chr2:219231521
GPN3	122.054	233.544	0.937	0.0006	UP	No	Yes	2	GPN3_exon_chr12:110890901_x000D_ GPN3_exon_chr12:110893735	0.7625_x000D_ 0.2375	0.8087_x000D_ 0.1913	0.0462_x000D_ -0.0462	NA_x000D_ NA	1_x000D_ 4	1.0_x000D_ 0.7211	1.0_x000D_ 0.1583	1.0_x000D_ -0.5628	NA_x000D_ Shortening	GPN3_exon_chr12:110890901	GPN3_exon_chr12:110893735
DEPDC1	81.5678	156.582	0.9352	0.0007	UP	No	Yes	2	DEPDC1_exon_chr1:68942752_x000D_ DEPDC1_exon_chr1:68954717	0.8701_x000D_ 0.1015	0.9054_x000D_ 0.0797	0.0353_x000D_ -0.0219	NA_x000D_ NA	1_x000D_ 9	1.0_x000D_ 0.5621	1.0_x000D_ 0.2211	1.0_x000D_ -0.341	NA_x000D_ Both	DEPDC1_exon_chr1:68942752	DEPDC1_exon_chr1:68954717
KIAA1191	50.9819	97.2763	0.935	0.0329	UP	No	Yes	1	KIAA1191_exon_chr5:175774811	1	1	0	NA	4	0.9817	0.627	-0.3548	Shortening	KIAA1191_exon_chr5:175774811
DGKG	21.036	40.8701	0.9347	0.0872	UP	No	No	1	DGKG_exon_chr3:185867977	1	1	0	NA	3	NA	NA	NA	NA	DGKG_exon_chr3:185867977
ZNF738	12.8823	24.242	0.9344	0.1712	NC	No	No	2	ZNF738_exon_chr19:21558963_x000D_ ZNF738_exon_chr19:21565667	0.8626_x000D_ 0.1374	0.1311_x000D_ 0.8689	-0.7315_x000D_ 0.7315	NA_x000D_ Up	4_x000D_ 4	NA_x000D_ NA	NA_x000D_ NA	NA_x000D_ NA	NA_x000D_ NA	ZNF738_exon_chr19:21558963	ZNF738_exon_chr19:21565667
ABCC5	16.5579	31.3541	0.9338	0.2393	NC	No	No	2	ABCC5_exon_chr3:183639189_x000D_ ABCC5_exon_chr3:183702682	0.9144_x000D_ 0.0856	0.8083_x000D_ 0.1917	-0.1061_x000D_ 0.1061	NA_x000D_ NA	2_x000D_ 1	NA_x000D_ 1.0	NA_x000D_ 1.0	NA_x000D_ 1.0	NA_x000D_ NA	ABCC5_exon_chr3:183639189	ABCC5_exon_chr3:183702682
AAMDC	7.0127	13.946	0.9337	0.3978	NC	No	No	1	AAMDC_exon_chr11:77583220	1	1	0	NA	1	1	1	1	NA	AAMDC_exon_chr11:77583220
TIMM10	39.6077	76.0258	0.9328	0.0143	UP	No	Yes	1	TIMM10_exon_chr11:57296391	1	1	0	NA	2	0.3193	0.2198	-0.0995	Shortening	TIMM10_exon_chr11:57296391
LOC441204	0.2548	0.682	0.9321	1	NC	No	No	1	LOC441204_exon_chr7:26438865	1	1	0	NA	1	1	1	1	NA	LOC441204_exon_chr7:26438865
C8orf44-SGK3	0.7645	1.5432	0.9314	1	NC	No	No	1	C8orf44-SGK3_exon_chr8:67591955	1	1	0	NA	2	NA	NA	NA	NA	C8orf44-SGK3_exon_chr8:67591955
LOC100506083	5.9438	11.2094	0.9314	0.5432	NC	No	No	1	LOC100506083_exon_chr16:70367863	1	1	0	NA	1	1	1	1	NA	LOC100506083_exon_chr16:70367863
ZFAND3	60.1296	114.756	0.9312	0.0033	UP	No	Yes	1	ZFAND3_exon_chr6:38120010	1	1	0	NA	4	0.5608	0.2085	-0.3523	Shortening	ZFAND3_exon_chr6:38120010
CENPK	35.4327	67.7249	0.9308	0.0228	UP	No	No	4	CENPK_exon_chr5:64812428_x000D_ CENPK_exon_chr5:64814460_x000D_ CENPK_exon_chr5:64824405_x000D_ CENPK_exon_chr5:64825026	0.1689_x000D_ 0.5957_x000D_ 0.1006_x000D_ 0.0988	0.8063_x000D_ 0.0478_x000D_ 0.0761_x000D_ 0.0438	0.6374_x000D_ -0.5479_x000D_ -0.0245_x000D_ -0.0551	NA_x000D_ Down_x000D_ NA_x000D_ NA	1_x000D_ 1_x000D_ 1_x000D_ 1	1.0_x000D_ 1.0_x000D_ 1.0_x000D_ 1.0	1.0_x000D_ 1.0_x000D_ 1.0_x000D_ 1.0	1.0_x000D_ 1.0_x000D_ 1.0_x000D_ 1.0	NA_x000D_ NA_x000D_ NA_x000D_ NA	CENPK_exon_chr5:64812428	CENPK_exon_chr5:64814460	CENPK_exon_chr5:64824405	CENPK_exon_chr5:64825026
FITM2	22.5853	42.9572	0.9303	0.1953	NC	No	Yes	1	FITM2_exon_chr20:42935880	1	1	0	NA	3	0.7256	0.1488	-0.5768	Shortening	FITM2_exon_chr20:42935880
TRIM44	156.443	297.868	0.9299	0.0075	UP	No	Yes	2	TRIM44_exon_chr11:35684322_x000D_ TRIM44_exon_chr11:35827907	0.5457_x000D_ 0.4543	0.5455_x000D_ 0.4545	-0.0002_x000D_ 0.0002	NA_x000D_ NA	2_x000D_ 5	0.0508_x000D_ 0.443	0.0496_x000D_ 0.1067	-0.0012_x000D_ -0.3363	NA_x000D_ Both	TRIM44_exon_chr11:35684322	TRIM44_exon_chr11:35827907
TNKS2-AS1	1.0194	2.0979	0.9296	1	NC	No	No	1	TNKS2-AS1_exon_chr10:93542917	1	1	0	NA	1	1	1	1	NA	TNKS2-AS1_exon_chr10:93542917
GNPTAB	36.8426	70.8541	0.9294	0.0274	UP	No	Yes	1	GNPTAB_exon_chr12:102141019	1	1	0	NA	2	1	0.887	-0.113	Shortening	GNPTAB_exon_chr12:102141019
C19orf12	26.5429	50.8309	0.9292	0.0599	UP	No	Yes	1	C19orf12_exon_chr19:30193884	1	1	0	NA	2	NA	NA	NA	Shortening	C19orf12_exon_chr19:30193884
PTPN14	32.4727	61.2993	0.9292	0.0288	UP	No	Yes	1	PTPN14_exon_chr1:214531393	1	1	0	NA	4	0.9143	0.2519	-0.6624	Shortening	PTPN14_exon_chr1:214531393
TMEM248	656.299	1248.64	0.9285	0	UP	No	No	1	TMEM248_exon_chr7:66420488	1	1	0	NA	1	1	1	1	NA	TMEM248_exon_chr7:66420488
PCBD2	22.6933	42.6989	0.9283	0.1709	NC	No	Yes	1	PCBD2_exon_chr5:134296275	1	1	0	NA	5	NA	NA	NA	Both	PCBD2_exon_chr5:134296275
PRPS1	69.0741	132.772	0.9277	0.0019	UP	No	Yes	1	PRPS1_exon_chrX:106893169	1	1	0	NA	2	0.7881	0.426	-0.3622	Shortening	PRPS1_exon_chrX:106893169
JUN	17.9311	34.6132	0.9276	0.1619	NC	No	Yes	1	JUN_exon_chr1:59249719	1	1	0	NA	5	NA	NA	NA	Both	JUN_exon_chr1:59249719
POPDC3	31.5059	60.6104	0.9276	0.083	UP	No	No	1	POPDC3_exon_chr6:105606626	1	1	0	NA	2	NA	NA	NA	NA	POPDC3_exon_chr6:105606626
ZNF426	1.8808	3.8607	0.9274	1	NC	No	No	1	ZNF426_exon_chr19:9640312	1	1	0	NA	1	1	1	1	NA	ZNF426_exon_chr19:9640312
MFNG	1.6623	3.3406	0.9272	1	NC	No	No	1	MFNG_exon_chr22:37866067	1	1	0	NA	1	1	1	1	NA	MFNG_exon_chr22:37866067
TEX14	0.7645	1.5518	0.9269	1	NC	No	No	1	TEX14_exon_chr17:56634408	1	1	0	NA	1	1	1	1	NA	TEX14_exon_chr17:56634408
LOC100419583	26.7822	50.4152	0.9268	0.0736	UP	No	No	1	LOC100419583_exon_chr15:45023560	1	1	0	NA	3	0.7293	0.6212	-0.1081	NA	LOC100419583_exon_chr15:45023560
METTL21A	19.8954	38.6158	0.926	0.0814	UP	No	Yes	2	METTL21A_exon_chr2:208446884_x000D_ METTL21A_exon_chr2:208478167	0.2373_x000D_ 0.7627	0.2955_x000D_ 0.7045	0.0582_x000D_ -0.0582	NA_x000D_ NA	4_x000D_ 4	NA_x000D_ NA	NA_x000D_ NA	NA_x000D_ NA	Shortening_x000D_ NA	METTL21A_exon_chr2:208446884	METTL21A_exon_chr2:208478167
LOC257396	5.1917	9.9034	0.9259	0.6052	NC	No	No	1	LOC257396_exon_chr5:52408069	1	1	0	NA	2	NA	NA	NA	NA	LOC257396_exon_chr5:52408069
FAM126A	30.4235	57.7136	0.9257	0.0777	UP	No	Yes	1	FAM126A_exon_chr7:22985782	1	1	0	NA	5	0.6123	0.1865	-0.4259	Shortening	FAM126A_exon_chr7:22985782
DSTYK	18.4018	34.9865	0.9256	0.1327	NC	No	Yes	1	DSTYK_exon_chr1:205116873	1	1	0	NA	3	0.781	0.4652	-0.3158	Shortening	DSTYK_exon_chr1:205116873
RGS5	6.187	12.0592	0.9254	0.4352	NC	No	No	1	RGS5_exon_chr1:163117293	1	1	0	NA	2	NA	NA	NA	NA	RGS5_exon_chr1:163117293
PTPN9	13.3558	25.4297	0.9252	0.2034	NC	No	Yes	1	PTPN9_exon_chr15:75761324	1	1	0	NA	3	1	0.5886	NA	Shortening	PTPN9_exon_chr15:75761324
LIPH	31.0755	58.2377	0.9242	0.0545	UP	No	Yes	1	LIPH_exon_chr3:185226665	1	1	0	NA	3	0.8894	0.6648	-0.2247	Shortening	LIPH_exon_chr3:185226665
CAMSAP1	55.7671	105.948	0.9234	0.0232	UP	No	Yes	2	CAMSAP1_exon_chr9:138703457_x000D_ CAMSAP1_exon_chr9:138758382	0.8278_x000D_ 0.1722	0.8325_x000D_ 0.1675	0.0047_x000D_ -0.0047	NA_x000D_ NA	3_x000D_ 1	0.3612_x000D_ 1.0	0.0891_x000D_ 1.0	-0.2721_x000D_ 1.0	Shortening_x000D_ NA	CAMSAP1_exon_chr9:138703457	CAMSAP1_exon_chr9:138758382
NSD3	80.4957	151.242	0.9223	0.0004	UP	Yes	Yes	4	NSD3_exon_chr8:38133400_x000D_ NSD3_exon_chr8:38134018_x000D_ NSD3_exon_chr8:38147023_x000D_ NSD3_exon_chr8:38175556	0.2604_x000D_ 0.0895_x000D_ 0.2373_x000D_ 0.3144	0.1311_x000D_ 0.0768_x000D_ 0.1185_x000D_ 0.6509	-0.1294_x000D_ -0.0128_x000D_ -0.1188_x000D_ 0.3365	NA_x000D_ NA_x000D_ NA_x000D_ Up	1_x000D_ 1_x000D_ 3_x000D_ 3	1.0_x000D_ 1.0_x000D_ 0.5592_x000D_ 0.9567	1.0_x000D_ 1.0_x000D_ 0.1181_x000D_ 0.2275	1.0_x000D_ 1.0_x000D_ -0.4411_x000D_ -0.7292	NA_x000D_ NA_x000D_ Both_x000D_ Shortening	NSD3_exon_chr8:38133400	NSD3_exon_chr8:38134018	NSD3_exon_chr8:38147023	NSD3_exon_chr8:38175556
ERN1	7.9566	14.6162	0.9222	0.4803	NC	No	No	1	ERN1_exon_chr17:62121560	1	1	0	NA	3	NA	NA	NA	NA	ERN1_exon_chr17:62121560
LONP2	57.7794	110.364	0.9222	0.0062	UP	No	Yes	1	LONP2_exon_chr16:48385491	1	1	0	NA	6	0.4536	0.1643	-0.2892	Shortening	LONP2_exon_chr16:48385491
LUCAT1	1.7956	3.4474	0.9213	1	NC	No	No	2	LUCAT1_exon_chr5:90598978_x000D_ LUCAT1_exon_chr5:90606849	0.0_x000D_ 1.0	0.0_x000D_ 1.0	0.0_x000D_ 0.0	NA_x000D_ NA	1_x000D_ 1	1.0_x000D_ 1.0	1.0_x000D_ 1.0	1.0_x000D_ 1.0	NA_x000D_ NA	LUCAT1_exon_chr5:90598978	LUCAT1_exon_chr5:90606849
SLC5A5	2.2558	4.1759	0.9212	1	NC	No	No	1	SLC5A5_exon_chr19:18004521	1	1	0	NA	1	1	1	1	NA	SLC5A5_exon_chr19:18004521
ARF4-AS1	0.6429	1.2195	0.9212	1	NC	No	No	1	ARF4-AS1_exon_chr3:57586469	1	1	0	NA	1	1	1	1	NA	ARF4-AS1_exon_chr3:57586469
DCK	68.0322	130.411	0.9212	0.0044	UP	No	Yes	1	DCK_exon_chr4:71895068	1	1	0	NA	9	0.9555	0.7105	-0.245	Both	DCK_exon_chr4:71895068
WAC-AS1	138.397	261.947	0.9197	0	UP	No	No	1	WAC-AS1_exon_chr10:28813540	1	1	0	NA	2	0.8455	0.9208	0.0753	NA	WAC-AS1_exon_chr10:28813540
HIF1A-AS2	0.6066	1.1703	0.9173	1	NC	No	No	1	HIF1A-AS2_exon_chr14:62215807	1	1	0	NA	1	1	1	1	NA	HIF1A-AS2_exon_chr14:62215807
ANTXR2	10.8224	20.9562	0.9169	0.3613	NC	No	No	2	ANTXR2_exon_chr4:80828621_x000D_ ANTXR2_exon_chr4:80898855	1.0_x000D_ 0.0	0.7747_x000D_ 0.2253	-0.2253_x000D_ 0.2253	NA_x000D_ NA	1_x000D_ 3	1.0_x000D_ NA	1.0_x000D_ NA	1.0_x000D_ NA	NA_x000D_ NA	ANTXR2_exon_chr4:80828621	ANTXR2_exon_chr4:80898855
GALNT5	24.9704	47.5727	0.9163	0.5153	NC	No	Yes	1	GALNT5_exon_chr2:158167719	1	1	0	NA	6	NA	NA	NA	Both	GALNT5_exon_chr2:158167719
FTH1P3	6.3321	12.0474	0.9163	0.4859	NC	No	No	1	FTH1P3_exon_chr2:27616443	1	1	0	NA	1	1	1	1	NA	FTH1P3_exon_chr2:27616443
RAB27A	21.9676	41.1066	0.9157	0.1028	NC	No	Yes	1	RAB27A_exon_chr15:55497903	1	1	0	NA	3	0.3872	0.0806	-0.3066	Shortening	RAB27A_exon_chr15:55497903
CCNE2	20.3459	38.9869	0.9154	0.1809	NC	No	No	1	CCNE2_exon_chr8:95893973	1	1	0	NA	3	1	0.8886	NA	NA	CCNE2_exon_chr8:95893973
SNAR-C2	123.925	234.512	0.9148	0.1604	NC	No	No	1	SNAR-C2_exon_chr19:48458938	1	1	0	NA	1	1	1	1	NA	SNAR-C2_exon_chr19:48458938
MMAA	1.9529	3.7512	0.9147	1	NC	No	No	1	MMAA_exon_chr4:146576298	1	1	0	NA	1	1	1	1	NA	MMAA_exon_chr4:146576298
SLC22A23	6.7566	12.767	0.9128	0.4721	NC	No	No	2	SLC22A23_exon_chr6:3273646_x000D_ SLC22A23_exon_chr6:3324236	1.0_x000D_ 0.0	0.7871_x000D_ 0.2129	-0.2129_x000D_ 0.2129	NA_x000D_ NA	1_x000D_ 3	1.0_x000D_ NA	1.0_x000D_ NA	1.0_x000D_ NA	NA_x000D_ NA	SLC22A23_exon_chr6:3273646	SLC22A23_exon_chr6:3324236
ZNF433-AS1	7.096	13.3999	0.9124	0.6329	NC	No	No	1	ZNF433-AS1_exon_chr19:12114206	1	1	0	NA	2	NA	NA	NA	NA	ZNF433-AS1_exon_chr19:12114206
TBC1D7-LOC100130357	14.6043	26.8427	0.9117	0.2381	NC	No	No	1	TBC1D7-LOC100130357_exon_chr6:13305419	1	1	0	NA	1	1	1	1	NA	TBC1D7-LOC100130357_exon_chr6:13305419
METTL27	14.5425	26.6499	0.9109	0.2968	NC	No	No	1	METTL27_exon_chr7:73249332	1	1	0	NA	1	1	1	1	NA	METTL27_exon_chr7:73249332
KRTAP2-3	3.5184	6.7125	0.91	0.7282	NC	No	No	1	KRTAP2-3_exon_chr17:39216366	1	1	0	NA	1	1	1	1	NA	KRTAP2-3_exon_chr17:39216366
PMS2P5	0.8978	1.7078	0.9097	1	NC	No	No	1	PMS2P5_exon_chr7:74335466	1	1	0	NA	1	1	1	1	NA	PMS2P5_exon_chr7:74335466
PERP	410.517	771.236	0.9093	0	UP	No	Yes	1	PERP_exon_chr6:138413405	1	1	0	NA	5	0.9733	0.394	-0.5794	Shortening	PERP_exon_chr6:138413405
TMEM67	22.8921	43.5253	0.909	0.081	UP	No	Yes	1	TMEM67_exon_chr8:94828599	1	1	0	NA	5	0.2786	0.4158	0.1372	Both	TMEM67_exon_chr8:94828599
TARS1	239.086	449.765	0.909	0.0016	UP	No	Yes	1	TARS1_exon_chr5:33467664	1	1	0	NA	4	0.2707	0.369	0.0983	Both	TARS1_exon_chr5:33467664
NANP	18.8283	35.4851	0.9088	0.2889	NC	No	Yes	1	NANP_exon_chr20:25597217	1	1	0	NA	4	NA	NA	NA	Shortening	NANP_exon_chr20:25597217
SMDT1	115.284	215.489	0.9088	0.0001	UP	No	No	1	SMDT1_exon_chr22:42479122	1	1	0	NA	1	1	1	1	NA	SMDT1_exon_chr22:42479122
DLGAP4	125.215	233.718	0.9083	0.0026	UP	No	No	1	DLGAP4_exon_chr20:35155215	1	1	0	NA	3	0.0952	0.0531	-0.0421	NA	DLGAP4_exon_chr20:35155215
STIM2	84.4038	158.81	0.9076	0.0003	UP	No	No	2	STIM2_exon_chr4:27003838_x000D_ STIM2_exon_chr4:27024140	0.0684_x000D_ 0.9316	0.0736_x000D_ 0.9264	0.0052_x000D_ -0.0052	NA_x000D_ NA	3_x000D_ 1	0.1102_x000D_ 1.0	0.0579_x000D_ 1.0	-0.0523_x000D_ 1.0	NA_x000D_ NA	STIM2_exon_chr4:27003838	STIM2_exon_chr4:27024140
IDS	64.4971	121.368	0.9072	0.006	UP	Yes	Yes	2	IDS_exon_chrX:148564749_x000D_ IDS_exon_chrX:148568844	0.7586_x000D_ 0.2414	0.6087_x000D_ 0.3913	-0.1498_x000D_ 0.1498	NA_x000D_ Up	2_x000D_ 5	0.9733_x000D_ 0.7639	0.7929_x000D_ 0.14	-0.1804_x000D_ -0.6238	Shortening_x000D_ Shortening	IDS_exon_chrX:148564749	IDS_exon_chrX:148568844
RAP1B	180.035	338.204	0.9071	0	UP	No	Yes	1	RAP1B_exon_chr12:69053059	1	1	0	NA	5	0.7927	0.2254	-0.5673	Shortening	RAP1B_exon_chr12:69053059
TSEN2	18.8622	35.3449	0.9064	0.139	NC	No	No	2	TSEN2_exon_chr3:12574160_x000D_ TSEN2_exon_chr3:12580659	0.7094_x000D_ 0.2906	0.9594_x000D_ 0.0406	0.25_x000D_ -0.25	Up_x000D_ NA	1_x000D_ 1	1.0_x000D_ 1.0	1.0_x000D_ 1.0	1.0_x000D_ 1.0	NA_x000D_ NA	TSEN2_exon_chr3:12574160	TSEN2_exon_chr3:12580659
OXCT1	77.4436	145.442	0.9064	0.002	UP	No	Yes	2	OXCT1_exon_chr5:41731872_x000D_ OXCT1_exon_chr5:41807540	0.7903_x000D_ 0.2097	0.8769_x000D_ 0.1231	0.0867_x000D_ -0.0867	NA_x000D_ NA	1_x000D_ 3	1.0_x000D_ 0.6967	1.0_x000D_ 0.1751	1.0_x000D_ -0.5216	NA_x000D_ Shortening	OXCT1_exon_chr5:41731872	OXCT1_exon_chr5:41807540
NDC1	103.666	196.372	0.9057	0.0047	UP	No	Yes	1	NDC1_exon_chr1:54233706	1	1	0	NA	4	0.5445	0.0789	-0.4655	Shortening	NDC1_exon_chr1:54233706
BEND6	12.008	22.0431	0.9056	0.351	NC	No	Yes	2	BEND6_exon_chr6:56872978_x000D_ BEND6_exon_chr6:56890879	0.4077_x000D_ 0.5923	0.5736_x000D_ 0.4264	0.166_x000D_ -0.166	NA_x000D_ NA	2_x000D_ 1	NA_x000D_ 1.0	NA_x000D_ 1.0	NA_x000D_ 1.0	Shortening_x000D_ NA	BEND6_exon_chr6:56872978	BEND6_exon_chr6:56890879
RPS6KB1	107.625	201.894	0.9056	0.0046	UP	No	Yes	1	RPS6KB1_exon_chr17:58023911	1	1	0	NA	5	0.4708	0.1961	-0.2747	Both	RPS6KB1_exon_chr17:58023911
RAB17	13.2596	25.4533	0.9054	0.1908	NC	No	No	1	RAB17_exon_chr2:238483771	1	1	0	NA	1	1	1	1	NA	RAB17_exon_chr2:238483771
SLC23A2	12.361	23.1704	0.9052	0.3141	NC	No	Yes	1	SLC23A2_exon_chr20:4837850	1	1	0	NA	3	NA	NA	NA	Shortening	SLC23A2_exon_chr20:4837850
TMEM25	21.9579	41.5223	0.9052	0.1013	NC	Yes	Yes	2	TMEM25_exon_chr11:118405221_x000D_ TMEM25_exon_chr11:118416833	0.6308_x000D_ 0.3692	0.479_x000D_ 0.521	-0.1518_x000D_ 0.1518	NA_x000D_ Up	2_x000D_ 2	NA_x000D_ NA	NA_x000D_ NA	NA_x000D_ NA	Lengthening_x000D_ NA	TMEM25_exon_chr11:118405221	TMEM25_exon_chr11:118416833
CAMK2N1	93.6428	174.565	0.9045	0.0025	UP	No	Yes	1	CAMK2N1_exon_chr1:20810212	1	1	0	NA	3	0.2631	0.1155	-0.1476	Shortening	CAMK2N1_exon_chr1:20810212
ADGRV1	2.172	4.361	0.9036	1	NC	No	No	1	ADGRV1_exon_chr5:90459598	1	1	0	NA	1	1	1	1	NA	ADGRV1_exon_chr5:90459598
EPS8	63.8802	120.165	0.9034	0.0051	UP	No	Yes	1	EPS8_exon_chr12:15774364	1	1	0	NA	6	0.5452	0.4832	-0.062	Both	EPS8_exon_chr12:15774364
ZNF559	12.1076	23.231	0.9029	0.2827	NC	No	No	1	ZNF559_exon_chr19:9452292	1	1	0	NA	1	1	1	1	NA	ZNF559_exon_chr19:9452292
TES	546.288	1020.66	0.9029	0.0001	UP	Yes	Yes	2	TES_exon_chr7:115874587_x000D_ TES_exon_chr7:115897347	0.3634_x000D_ 0.6366	0.241_x000D_ 0.759	-0.1224_x000D_ 0.1224	NA_x000D_ Up	2_x000D_ 1	0.656_x000D_ 1.0	0.279_x000D_ 1.0	-0.377_x000D_ 1.0	Shortening_x000D_ NA	TES_exon_chr7:115874587	TES_exon_chr7:115897347
CATSPER1	4.7548	8.7996	0.9017	0.636	NC	No	No	1	CATSPER1_exon_chr11:65784387	1	1	0	NA	1	1	1	1	NA	CATSPER1_exon_chr11:65784387
ARHGEF34P	11.3547	21.2162	0.9014	0.3937	NC	No	No	2	ARHGEF34P_exon_chr7:143971214_x000D_ ARHGEF34P_exon_chr7:143983096	0.1923_x000D_ 0.8077	0.3298_x000D_ 0.6702	0.1375_x000D_ -0.1375	NA_x000D_ NA	1_x000D_ 1	1.0_x000D_ 1.0	1.0_x000D_ 1.0	1.0_x000D_ 1.0	NA_x000D_ NA	ARHGEF34P_exon_chr7:143971214	ARHGEF34P_exon_chr7:143983096
SLC35E3	6.0772	11.4726	0.9012	0.6246	NC	No	No	1	SLC35E3_exon_chr12:69158483	1	1	0	NA	4	NA	NA	NA	NA	SLC35E3_exon_chr12:69158483
C11orf80	4.9128	9.0768	0.8991	0.4992	NC	No	No	1	C11orf80_exon_chr11:66610639	1	1	0	NA	1	1	1	1	NA	C11orf80_exon_chr11:66610639
GMIP	4.6463	8.8572	0.899	0.627	NC	No	No	1	GMIP_exon_chr19:19741145	1	1	0	NA	1	1	1	1	NA	GMIP_exon_chr19:19741145
GRM4	1.7345	3.1933	0.8983	1	NC	No	No	1	GRM4_exon_chr6:33990647	1	1	0	NA	1	1	1	1	NA	GRM4_exon_chr6:33990647
PDHX	44.4433	82.6595	0.8982	0.0546	UP	No	Yes	1	PDHX_exon_chr11:35016460	1	1	0	NA	3	0.825	0.3026	-0.5224	Shortening	PDHX_exon_chr11:35016460
SULT4A1	1.9172	3.7334	0.8981	1	NC	No	No	1	SULT4A1_exon_chr22:44221993	1	1	0	NA	2	NA	NA	NA	NA	SULT4A1_exon_chr22:44221993
PGM3	80.9996	152.263	0.8973	0.0025	UP	No	Yes	1	PGM3_exon_chr6:83879042	1	1	0	NA	9	0.2129	0.1257	-0.0872	Both	PGM3_exon_chr6:83879042
PAPOLG	33.7443	62.3266	0.8968	0.0722	UP	No	Yes	1	PAPOLG_exon_chr2:61024196	1	1	0	NA	6	0.9188	0.3365	-0.5823	Shortening	PAPOLG_exon_chr2:61024196
P4HA3	1.4191	2.5749	0.8955	1	NC	No	No	1	P4HA3_exon_chr11:73978363	1	1	0	NA	1	1	1	1	NA	P4HA3_exon_chr11:73978363
SEC24D	18.7404	34.31	0.8951	0.1276	NC	No	No	1	SEC24D_exon_chr4:119644810	1	1	0	NA	1	1	1	1	NA	SEC24D_exon_chr4:119644810
AIFM2	173.512	322.621	0.8945	0.0004	UP	No	Yes	1	AIFM2_exon_chr10:71874085	1	1	0	NA	2	0.2469	0.1041	-0.1428	Shortening	AIFM2_exon_chr10:71874085
ZNF503-AS1	2.1109	4.0458	0.8933	1	NC	No	No	1	ZNF503-AS1_exon_chr10:77120378	1	1	0	NA	2	NA	NA	NA	NA	ZNF503-AS1_exon_chr10:77120378
MICA	25.4768	47.4464	0.8933	0.5134	NC	No	No	1	MICA_exon_chr6:31382788	1	1	0	NA	2	NA	NA	NA	NA	MICA_exon_chr6:31382788
ZNF226	22.7795	41.8817	0.8931	0.126	NC	No	Yes	1	ZNF226_exon_chr19:44679136	1	1	0	NA	4	0.5204	0.6518	0.1314	Lengthening	ZNF226_exon_chr19:44679136
TMOD4	2.4379	4.4764	0.8929	1	NC	No	No	1	TMOD4_exon_chr1:151142579	1	1	0	NA	1	1	1	1	NA	TMOD4_exon_chr1:151142579
SNAR-C3	195.279	363.421	0.8929	0.3062	NC	No	No	1	SNAR-C3_exon_chr19:48453552	1	1	0	NA	1	1	1	1	NA	SNAR-C3_exon_chr19:48453552
FTL	2295.85	4262.26	0.8927	0	UP	No	No	1	FTL_exon_chr19:49469839	1	1	0	NA	1	1	1	1	NA	FTL_exon_chr19:49469839
NDST1	23.766	44.7819	0.8922	0.0959	UP	No	Yes	1	NDST1_exon_chr5:149932774	1	1	0	NA	2	0.8904	0.5031	-0.3873	Shortening	NDST1_exon_chr5:149932774
FAM83B	17.1784	32.4029	0.892	0.2178	NC	No	Yes	1	FAM83B_exon_chr6:54804503	1	1	0	NA	2	NA	NA	NA	Shortening	FAM83B_exon_chr6:54804503
MIR1915HG	25.2299	46.5895	0.8912	0.1303	NC	No	Yes	1	MIR1915HG_exon_chr10:21784874	1	1	0	NA	3	0.912	0.6838	-0.2282	Shortening	MIR1915HG_exon_chr10:21784874
RRAGD	34.6949	65.1647	0.8904	0.0359	UP	No	Yes	1	RRAGD_exon_chr6:90077926	1	1	0	NA	3	0.4137	0.0677	-0.346	Shortening	RRAGD_exon_chr6:90077926
ZC3H10	28.7269	54.0362	0.8893	0.0959	UP	No	No	1	ZC3H10_exon_chr12:56514294	1	1	0	NA	4	0.1197	0.0246	-0.0951	NA	ZC3H10_exon_chr12:56514294
MNT	35.8342	66.2933	0.889	0.0277	UP	No	Yes	1	MNT_exon_chr17:2290943	1	1	0	NA	4	0.8349	0.4823	-0.3526	Both	MNT_exon_chr17:2290943
WHAMMP1	3.9793	7.5104	0.8889	0.604	NC	No	No	1	WHAMMP1_exon_chr15:32819179	1	1	0	NA	1	1	1	1	NA	WHAMMP1_exon_chr15:32819179
GRK3	28.8464	53.7473	0.8889	0.0466	UP	No	Yes	1	GRK3_exon_chr22:26118255	1	1	0	NA	6	0.5565	0.0514	-0.5051	Shortening	GRK3_exon_chr22:26118255
ILDR1	0.6429	1.1703	0.8886	1	NC	No	No	1	ILDR1_exon_chr3:121707255	1	1	0	NA	1	1	1	1	NA	ILDR1_exon_chr3:121707255
CPD	79.3325	146.813	0.8886	0.0044	UP	No	Yes	1	CPD_exon_chr17:28791605	1	1	0	NA	6	0.8294	0.2335	-0.596	Shortening	CPD_exon_chr17:28791605
GPC2	2.4385	4.6382	0.8881	0.7679	NC	No	No	1	GPC2_exon_chr7:99768106	1	1	0	NA	1	1	1	1	NA	GPC2_exon_chr7:99768106
MEIG1	5.8711	10.7787	0.8881	0.6087	NC	No	No	1	MEIG1_exon_chr10:15014511	1	1	0	NA	1	1	1	1	NA	MEIG1_exon_chr10:15014511
USP24	33.9805	63.808	0.8878	0.0377	UP	No	Yes	1	USP24_exon_chr1:55534780	1	1	0	NA	6	0.6398	0.171	-0.4688	Shortening	USP24_exon_chr1:55534780
PGM2L1	44.7689	81.5977	0.8874	0.0715	UP	No	No	1	PGM2L1_exon_chr11:74047799	1	1	0	NA	7	0.9815	0.9294	-0.052	NA	PGM2L1_exon_chr11:74047799
PPM1M	3.482	6.8576	0.8869	0.6292	NC	No	No	1	PPM1M_exon_chr3:52283685	1	1	0	NA	1	1	1	1	NA	PPM1M_exon_chr3:52283685
TTC7A	45.9637	85.505	0.8863	0.0056	UP	No	Yes	1	TTC7A_exon_chr2:47300840	1	1	0	NA	5	0.4521	0.2138	-0.2383	Shortening	TTC7A_exon_chr2:47300840
MACF1	166.395	308.149	0.8861	0.0001	UP	No	Yes	3	MACF1_exon_chr1:39845915_x000D_ MACF1_exon_chr1:39895498_x000D_ MACF1_exon_chr1:39951209	0.1078_x000D_ 0.1621_x000D_ 0.6005	0.0529_x000D_ 0.1961_x000D_ 0.6876	-0.0549_x000D_ 0.0341_x000D_ 0.0872	NA_x000D_ NA_x000D_ NA	1_x000D_ 5_x000D_ 1	1.0_x000D_ 0.5599_x000D_ 1.0	1.0_x000D_ 0.2196_x000D_ 1.0	1.0_x000D_ -0.3403_x000D_ 1.0	NA_x000D_ Both_x000D_ NA	MACF1_exon_chr1:39845915	MACF1_exon_chr1:39895498	MACF1_exon_chr1:39951209
PECR	18.1821	32.9893	0.8859	0.1403	NC	No	Yes	1	PECR_exon_chr2:216904083	1	1	0	NA	3	0.5329	0.3214	-0.2115	Shortening	PECR_exon_chr2:216904083
FDX1	131.024	242.999	0.8859	0	UP	No	Yes	1	FDX1_exon_chr11:110333077	1	1	0	NA	7	0.3872	0.1333	-0.2539	Shortening	FDX1_exon_chr11:110333077
DYSF	0.7645	1.4795	0.8856	1	NC	No	No	1	DYSF_exon_chr2:71913583	1	1	0	NA	1	1	1	1	NA	DYSF_exon_chr2:71913583
CCDC157	3.7361	6.8171	0.8855	0.8886	NC	No	No	2	CCDC157_exon_chr22:30761932_x000D_ CCDC157_exon_chr22:30772421	0.0684_x000D_ 0.9316	0.5986_x000D_ 0.4014	0.5302_x000D_ -0.5302	NA_x000D_ NA	1_x000D_ 1	1.0_x000D_ 1.0	1.0_x000D_ 1.0	1.0_x000D_ 1.0	NA_x000D_ NA	CCDC157_exon_chr22:30761932	CCDC157_exon_chr22:30772421
MEGF6	13.1001	23.5856	0.8855	0.2739	NC	No	No	1	MEGF6_exon_chr1:3407153	1	1	0	NA	4	NA	NA	NA	NA	MEGF6_exon_chr1:3407153
BRWD3	63.1304	117.625	0.8853	0.0063	UP	No	Yes	1	BRWD3_exon_chrX:79932862	1	1	0	NA	7	0.0799	0.4134	0.3336	Lengthening	BRWD3_exon_chrX:79932862
DEPDC1B	76.3938	140.73	0.8852	0.0081	UP	No	Yes	2	DEPDC1B_exon_chr5:59893741_x000D_ DEPDC1B_exon_chr5:59895087	0.953_x000D_ 0.047	0.953_x000D_ 0.047	0.0_x000D_ -0.0	NA_x000D_ NA	1_x000D_ 5	1.0_x000D_ 0.9425	1.0_x000D_ 0.3593	1.0_x000D_ -0.5832	NA_x000D_ Both	DEPDC1B_exon_chr5:59893741	DEPDC1B_exon_chr5:59895087
RGCC	1.2859	2.3493	0.8849	1	NC	No	No	1	RGCC_exon_chr13:42044613	1	1	0	NA	1	1	1	1	NA	RGCC_exon_chr13:42044613
PRKAR2A-AS1	1.2859	2.358	0.8845	1	NC	No	No	1	PRKAR2A-AS1_exon_chr3:48886419	1	1	0	NA	1	1	1	1	NA	PRKAR2A-AS1_exon_chr3:48886419
TOMM40L	32.2329	60.0317	0.8837	0.1089	NC	No	No	1	TOMM40L_exon_chr1:161198745	1	1	0	NA	2	0.0839	0.0722	-0.0117	NA	TOMM40L_exon_chr1:161198745
ATG2B	6.1149	11.6745	0.8828	0.5419	NC	No	Yes	1	ATG2B_exon_chr14:96752322	1	1	0	NA	3	NA	NA	NA	Shortening	ATG2B_exon_chr14:96752322
UVSSA	4.0268	7.3196	0.8827	0.7257	NC	No	Yes	1	UVSSA_exon_chr4:1379655	1	1	0	NA	2	NA	NA	NA	Shortening	UVSSA_exon_chr4:1379655
ZNF385C	2.4015	4.355	0.8825	1	NC	No	No	1	ZNF385C_exon_chr17:40179151	1	1	0	NA	1	1	1	1	NA	ZNF385C_exon_chr17:40179151
ATG16L2	14.7639	27.8494	0.8824	0.2836	NC	No	No	1	ATG16L2_exon_chr11:72540347	1	1	0	NA	2	0.7532	0.7594	0.0061	NA	ATG16L2_exon_chr11:72540347
GDF5	1.9405	3.4678	0.8823	1	NC	No	No	1	GDF5_exon_chr20:34022581	1	1	0	NA	1	1	1	1	NA	GDF5_exon_chr20:34022581
HMGCR	141.161	262.784	0.8821	0.0002	UP	No	Yes	1	HMGCR_exon_chr5:74656112	1	1	0	NA	8	0.7575	0.2363	-0.5212	Shortening	HMGCR_exon_chr5:74656112
RABIF	17.9782	33.5062	0.8811	0.127	NC	No	Yes	1	RABIF_exon_chr1:202850351	1	1	0	NA	4	NA	NA	NA	Shortening	RABIF_exon_chr1:202850351
TBXAS1	1.6617	2.9877	0.8794	1	NC	No	No	1	TBXAS1_exon_chr7:139497008	1	1	0	NA	1	1	1	1	NA	TBXAS1_exon_chr7:139497008
GRID1	3.3247	6.4847	0.8792	0.8357	NC	No	No	1	GRID1_exon_chr10:87362458	1	1	0	NA	2	NA	NA	NA	NA	GRID1_exon_chr10:87362458
LINC01000	5.5084	10.5678	0.8792	0.5614	NC	No	No	1	LINC01000_exon_chr7:128291242	1	1	0	NA	1	1	1	1	NA	LINC01000_exon_chr7:128291242
APOBEC3C	41.801	76.8884	0.8786	0.0166	UP	No	Yes	1	APOBEC3C_exon_chr22:39414273	1	1	0	NA	2	0.7656	0.577	-0.1887	Shortening	APOBEC3C_exon_chr22:39414273
CENPB	36.8538	68.3197	0.878	0.0211	UP	No	Yes	1	CENPB_exon_chr20:3767387	1	1	0	NA	2	0.944	0.8487	-0.0954	Shortening	CENPB_exon_chr20:3767387
STAC3	9.8249	17.6621	0.8775	0.3992	NC	No	No	1	STAC3_exon_chr12:57637693	1	1	0	NA	1	1	1	1	NA	STAC3_exon_chr12:57637693
CLCC1	18.7653	34.4286	0.877	0.0889	UP	No	Yes	1	CLCC1_exon_chr1:109475123	1	1	0	NA	3	0.3276	0.1841	-0.1435	Shortening	CLCC1_exon_chr1:109475123
GPR180	36.7784	67.4295	0.877	0.0672	UP	No	Yes	1	GPR180_exon_chr13:95279266	1	1	0	NA	7	0.6691	0.1409	-0.5283	Shortening	GPR180_exon_chr13:95279266
STC2	157.988	291.443	0.8769	0.0143	UP	No	Yes	1	STC2_exon_chr5:172745252	1	1	0	NA	5	0.2379	0.0774	-0.1605	Shortening	STC2_exon_chr5:172745252
LINC00839	7.8246	14.4167	0.8768	0.4865	NC	No	No	1	LINC00839_exon_chr10:42989462	1	1	0	NA	3	NA	NA	NA	NA	LINC00839_exon_chr10:42989462
INCENP	94.6783	174.049	0.8766	0.0013	UP	Yes	No	2	INCENP_exon_chr11:61914129_x000D_ INCENP_exon_chr11:61919233	0.4355_x000D_ 0.5645	0.2364_x000D_ 0.7636	-0.1991_x000D_ 0.1991	NA_x000D_ Up	1_x000D_ 1	1.0_x000D_ 1.0	1.0_x000D_ 1.0	1.0_x000D_ 1.0	NA_x000D_ NA	INCENP_exon_chr11:61914129	INCENP_exon_chr11:61919233
MFSD11	6.8664	12.7844	0.8752	0.4504	NC	No	No	1	MFSD11_exon_chr17:74774269	1	1	0	NA	4	NA	NA	NA	NA	MFSD11_exon_chr17:74774269
SCNN1D	4.3062	7.7618	0.8742	0.7323	NC	No	No	1	SCNN1D_exon_chr1:1226633	1	1	0	NA	1	1	1	1	NA	SCNN1D_exon_chr1:1226633
ELMOD3	11.8028	21.815	0.8738	0.3705	NC	No	No	1	ELMOD3_exon_chr2:85617882	1	1	0	NA	1	1	1	1	NA	ELMOD3_exon_chr2:85617882
COL12A1	89.5871	164.566	0.8737	0.0077	UP	No	Yes	1	COL12A1_exon_chr6:75796273	1	1	0	NA	2	0.6906	0.1351	-0.5555	Shortening	COL12A1_exon_chr6:75796273
TIGD6	4.9733	9.0914	0.8723	0.6842	NC	No	Yes	1	TIGD6_exon_chr5:149375992	1	1	0	NA	3	NA	NA	NA	Shortening	TIGD6_exon_chr5:149375992
EOGT	35.4699	65.3522	0.8721	0.0754	UP	No	Yes	1	EOGT_exon_chr3:69026915	1	1	0	NA	2	0.9724	0.1787	-0.7938	Shortening	EOGT_exon_chr3:69026915
PDZD11	35.2649	65.2285	0.8712	0.0448	UP	No	No	1	PDZD11_exon_chrX:69506966	1	1	0	NA	1	1	1	1	NA	PDZD11_exon_chrX:69506966
TENT5C	3.3721	6.0772	0.871	0.8675	NC	No	Yes	1	TENT5C_exon_chr1:118165463	1	1	0	NA	2	NA	NA	NA	Shortening	TENT5C_exon_chr1:118165463
TOM1L2	42.6411	78.8122	0.8708	0.0201	UP	No	Yes	1	TOM1L2_exon_chr17:17751097	1	1	0	NA	2	0.5607	0.2358	-0.325	Shortening	TOM1L2_exon_chr17:17751097
AP3M1	73.8217	134.132	0.8707	0.0064	UP	No	Yes	1	AP3M1_exon_chr10:75883668	1	1	0	NA	6	0.4497	0.1292	-0.3205	Shortening	AP3M1_exon_chr10:75883668
CEP41	11.269	20.7546	0.8702	0.342	NC	No	Yes	1	CEP41_exon_chr7:130038880	1	1	0	NA	3	NA	NA	NA	Shortening	CEP41_exon_chr7:130038880
TNKS	41.9349	76.6365	0.8696	0.015	UP	No	Yes	1	TNKS_exon_chr8:9634159	1	1	0	NA	11	0.74	0.3808	-0.3593	Shortening	TNKS_exon_chr8:9634159
ZMAT5	13.4643	24.4967	0.8681	0.2513	NC	No	No	1	ZMAT5_exon_chr22:30127343	1	1	0	NA	1	1	1	1	NA	ZMAT5_exon_chr22:30127343
STXBP4	16.6185	30.2705	0.8677	0.1708	NC	No	Yes	2	STXBP4_exon_chr17:53063502_x000D_ STXBP4_exon_chr17:53237157	0.0461_x000D_ 0.9539	0.0985_x000D_ 0.9015	0.0524_x000D_ -0.0524	NA_x000D_ NA	1_x000D_ 7	1.0_x000D_ 0.4441	1.0_x000D_ 0.0738	1.0_x000D_ -0.3702	NA_x000D_ Both	STXBP4_exon_chr17:53063502	STXBP4_exon_chr17:53237157
PLAUR	122.163	222.482	0.8672	0.0006	UP	No	Yes	2	PLAUR_exon_chr19:44150700_x000D_ PLAUR_exon_chr19:44153295	0.2546_x000D_ 0.7454	0.3126_x000D_ 0.6874	0.058_x000D_ -0.058	NA_x000D_ NA	1_x000D_ 2	1.0_x000D_ 0.3758	1.0_x000D_ 0.2213	1.0_x000D_ -0.1545	NA_x000D_ Shortening	PLAUR_exon_chr19:44150700	PLAUR_exon_chr19:44153295
VTRNA1-2	0.8978	1.7051	0.8664	1	NC	No	No	1	VTRNA1-2_exon_chr5:140098510	1	1	0	NA	1	1	1	1	NA	VTRNA1-2_exon_chr5:140098510
CENPW	166.312	304.57	0.8664	0.0003	UP	No	No	1	CENPW_exon_chr6:126669611	1	1	0	NA	1	1	1	1	NA	CENPW_exon_chr6:126669611
CCT6P1	8.3117	15.8502	0.8662	0.511	NC	No	No	1	CCT6P1_exon_chr7:65228267	1	1	0	NA	1	1	1	1	NA	CCT6P1_exon_chr7:65228267
CAP2	12.3364	22.3058	0.8662	0.2331	NC	No	No	1	CAP2_exon_chr6:17556589	1	1	0	NA	1	1	1	1	NA	CAP2_exon_chr6:17556589
IL12A	4.2225	7.9843	0.8658	0.8247	NC	No	No	1	IL12A_exon_chr3:159713190	1	1	0	NA	1	1	1	1	NA	IL12A_exon_chr3:159713190
FAM168B	86.4806	157.658	0.8648	0.0036	UP	No	Yes	1	FAM168B_exon_chr2:131810025	1	1	0	NA	5	0.8868	0.3909	-0.4959	Both	FAM168B_exon_chr2:131810025
MIR21	563.097	1024.17	0.8644	0	UP	No	No	1	MIR21_exon_chr17:57917128	1	1	0	NA	10	0.5206	0.5698	0.0493	NA	MIR21_exon_chr17:57917128
DENND4C	13.4299	24.8575	0.8642	0.3031	NC	No	Yes	1	DENND4C_exon_chr9:19372034	1	1	0	NA	4	NA	NA	NA	Both	DENND4C_exon_chr9:19372034
SLC39A8	64.0486	117.108	0.8642	0.0054	UP	No	Yes	1	SLC39A8_exon_chr4:103184350	1	1	0	NA	2	0.8975	0.3891	-0.5084	Shortening	SLC39A8_exon_chr4:103184350
EFEMP2	0.9583	1.7396	0.864	1	NC	No	No	1	EFEMP2_exon_chr11:65634550	1	1	0	NA	1	1	1	1	NA	EFEMP2_exon_chr11:65634550
SCMH1	22.1172	40.5144	0.8635	0.5018	NC	No	No	1	SCMH1_exon_chr1:41493991	1	1	0	NA	1	1	1	1	NA	SCMH1_exon_chr1:41493991
SNAR-C4	200.944	366.235	0.863	0.3321	NC	No	No	1	SNAR-C4_exon_chr19:48442797	1	1	0	NA	1	1	1	1	NA	SNAR-C4_exon_chr19:48442797
REM2	2.6803	4.6786	0.8628	1	NC	No	No	1	REM2_exon_chr14:23355822	1	1	0	NA	1	1	1	1	NA	REM2_exon_chr14:23355822
ZNF133	3.9422	7.0885	0.8622	0.7153	NC	No	No	1	ZNF133_exon_chr20:18295712	1	1	0	NA	1	1	1	1	NA	ZNF133_exon_chr20:18295712
PGPEP1	82.6754	149.414	0.8609	0.0224	UP	No	No	1	PGPEP1_exon_chr19:18474200	1	1	0	NA	1	1	1	1	NA	PGPEP1_exon_chr19:18474200
EZH1	33.0812	60.4882	0.86	0.0324	UP	No	No	3	EZH1_exon_chr17:40854610_x000D_ EZH1_exon_chr17:40870085_x000D_ EZH1_exon_chr17:40872467	0.9226_x000D_ 0.0194_x000D_ 0.058	0.7419_x000D_ 0.1085_x000D_ 0.1496	-0.1807_x000D_ 0.0891_x000D_ 0.0916	NA_x000D_ NA_x000D_ NA	2_x000D_ 1_x000D_ 1	0.6679_x000D_ 1.0_x000D_ 1.0	0.6672_x000D_ 1.0_x000D_ 1.0	-0.0008_x000D_ 1.0_x000D_ 1.0	NA_x000D_ NA_x000D_ NA	EZH1_exon_chr17:40854610	EZH1_exon_chr17:40870085	EZH1_exon_chr17:40872467
TMTC3	106.189	192.972	0.8595	0.0008	UP	No	Yes	1	TMTC3_exon_chr12:88588614	1	1	0	NA	9	0.4549	0.1209	-0.334	Both	TMTC3_exon_chr12:88588614
YKT6	127.051	232.804	0.8594	0.0006	UP	No	Yes	1	YKT6_exon_chr7:44251845	1	1	0	NA	4	0.7068	0.5018	-0.2049	Shortening	YKT6_exon_chr7:44251845
LOC100630923	52.841	96.0623	0.8576	0.0325	UP	No	Yes	1	LOC100630923_exon_chr7:102065460	1	1	0	NA	2	0.2751	0.0556	-0.2195	Shortening	LOC100630923_exon_chr7:102065460
GPR158	1.8072	3.1933	0.8575	1	NC	No	No	1	GPR158_exon_chr10:25886700	1	1	0	NA	1	1	1	1	NA	GPR158_exon_chr10:25886700
SHOX2	40.5234	72.3683	0.857	0.0781	UP	No	Yes	1	SHOX2_exon_chr3:157816109	1	1	0	NA	7	0.2731	0.1698	-0.1033	Both	SHOX2_exon_chr3:157816109
IRAK1BP1	22.2095	40.1396	0.8566	0.2064	NC	No	Yes	1	IRAK1BP1_exon_chr6:79607780	1	1	0	NA	5	0.6661	0.1787	-0.4874	Shortening	IRAK1BP1_exon_chr6:79607780
CFAP70	1.5407	2.9477	0.8562	0.8132	NC	No	No	1	CFAP70_exon_chr10:75013813	1	1	0	NA	1	1	1	1	NA	CFAP70_exon_chr10:75013813
ARHGAP26	23.6552	43.0177	0.8559	0.2061	NC	No	Yes	1	ARHGAP26_exon_chr5:142601922	1	1	0	NA	4	0.4918	0.184	-0.3078	Both	ARHGAP26_exon_chr5:142601922
PAPLN	5.5084	10.3423	0.8551	0.5677	NC	No	No	1	PAPLN_exon_chr14:73739202	1	1	0	NA	1	1	1	1	NA	PAPLN_exon_chr14:73739202
GADD45A	924.341	1670.69	0.8551	0.0003	UP	No	No	1	GADD45A_exon_chr1:68153343	1	1	0	NA	5	0.0645	0.1004	0.036	NA	GADD45A_exon_chr1:68153343
DLGAP1-AS2	10.0929	18.4803	0.8541	0.3802	NC	No	No	1	DLGAP1-AS2_exon_chr18:3609730	1	1	0	NA	1	1	1	1	NA	DLGAP1-AS2_exon_chr18:3609730
MGST2	25.8256	46.3174	0.853	0.2034	NC	No	No	1	MGST2_exon_chr4:140625169	1	1	0	NA	1	1	1	1	NA	MGST2_exon_chr4:140625169
MFAP3	21.9346	40.6646	0.8523	0.1006	NC	No	Yes	1	MFAP3_exon_chr5:153432479	1	1	0	NA	5	0.7658	0.6347	-0.1311	Both	MFAP3_exon_chr5:153432479
PCDH7	111.941	201.592	0.8514	0.0305	UP	No	Yes	1	PCDH7_exon_chr4:31144094	1	1	0	NA	10	0.5818	0.1785	-0.4032	Shortening	PCDH7_exon_chr4:31144094
BTD	14.762	26.5513	0.851	0.2439	NC	No	No	2	BTD_exon_chr3:15683414_x000D_ BTD_exon_chr3:15685822	0.3254_x000D_ 0.6746	0.1362_x000D_ 0.8638	-0.1892_x000D_ 0.1892	NA_x000D_ NA	1_x000D_ 2	1.0_x000D_ NA	1.0_x000D_ NA	1.0_x000D_ NA	NA_x000D_ NA	BTD_exon_chr3:15683414	BTD_exon_chr3:15685822
SNORD12B	0	0.3005	0.8495	1	NC	No	No	1	SNORD12B_exon_chr20:47896849	1	1	0	NA	1	1	1	1	NA	SNORD12B_exon_chr20:47896849
RNU5B-1	0	0.2687	0.8495	1	NC	No	No	1	RNU5B-1_exon_chr15:65597014	1	1	0	NA	1	1	1	1	NA	RNU5B-1_exon_chr15:65597014
FAM50B	0	0.341	0.8494	1	NC	No	No	1	FAM50B_exon_chr6:3850022	1	1	0	NA	1	1	1	1	NA	FAM50B_exon_chr6:3850022
PDE11A	0	0.341	0.8494	1	NC	No	No	1	PDE11A_exon_chr2:178494290	1	1	0	NA	1	1	1	1	NA	PDE11A_exon_chr2:178494290
CARD9	0	0.2687	0.8494	1	NC	No	No	1	CARD9_exon_chr9:139258853	1	1	0	NA	1	1	1	1	NA	CARD9_exon_chr9:139258853
GEMIN8P4	0	0.341	0.8494	1	NC	No	No	1	GEMIN8P4_exon_chr1:90460525	1	1	0	NA	1	1	1	1	NA	GEMIN8P4_exon_chr1:90460525
SLC25A31	0	0.341	0.8494	1	NC	No	No	1	SLC25A31_exon_chr4:128694540	1	1	0	NA	1	1	1	1	NA	SLC25A31_exon_chr4:128694540
CDRT3	0	0.3005	0.8494	1	NC	No	No	1	CDRT3_exon_chr17:15374150	1	1	0	NA	1	1	1	1	NA	CDRT3_exon_chr17:15374150
ABCC6	0	0.2687	0.8494	1	NC	No	No	1	ABCC6_exon_chr16:16244098	1	1	0	NA	1	1	1	1	NA	ABCC6_exon_chr16:16244098
LINC01589	0	0.2687	0.8494	1	NC	No	No	1	LINC01589_exon_chr22:46000638	1	1	0	NA	1	1	1	1	NA	LINC01589_exon_chr22:46000638
ZNRF2P1	0	0.3005	0.8494	1	NC	No	No	1	ZNRF2P1_exon_chr7:32767561	1	1	0	NA	1	1	1	1	NA	ZNRF2P1_exon_chr7:32767561
TCEANC	0	0.3005	0.8494	1	NC	No	No	1	TCEANC_exon_chrX:13680619	1	1	0	NA	1	1	1	1	NA	TCEANC_exon_chrX:13680619
CLCNKB	0	0.2687	0.8494	1	NC	No	No	1	CLCNKB_exon_chr1:16383363	1	1	0	NA	1	1	1	1	NA	CLCNKB_exon_chr1:16383363
RNF32	0	0.3005	0.8494	1	NC	No	No	1	RNF32_exon_chr7:156451556	1	1	0	NA	1	1	1	1	NA	RNF32_exon_chr7:156451556
LGI4	0	0.341	0.8494	1	NC	No	No	1	LGI4_exon_chr19:35616411	1	1	0	NA	1	1	1	1	NA	LGI4_exon_chr19:35616411
LINC01635	0	0.2687	0.8494	1	NC	No	No	1	LINC01635_exon_chr1:22350938	1	1	0	NA	1	1	1	1	NA	LINC01635_exon_chr1:22350938
GNG2	0	0.2687	0.8494	1	NC	No	No	1	GNG2_exon_chr14:52433276	1	1	0	NA	1	1	1	1	NA	GNG2_exon_chr14:52433276
TRHDE	0	0.2687	0.8494	1	NC	No	No	1	TRHDE_exon_chr12:73056831	1	1	0	NA	1	1	1	1	NA	TRHDE_exon_chr12:73056831
LOC400710	0	0.2687	0.8494	1	NC	No	No	1	LOC400710_exon_chr19:50569331	1	1	0	NA	1	1	1	1	NA	LOC400710_exon_chr19:50569331
FAM66D	0	0.341	0.8494	1	NC	No	No	1	FAM66D_exon_chr8:12008505	1	1	0	NA	1	1	1	1	NA	FAM66D_exon_chr8:12008505
FAM71F2	0	0.2687	0.8494	1	NC	No	No	1	FAM71F2_exon_chr7:128323017	1	1	0	NA	1	1	1	1	NA	FAM71F2_exon_chr7:128323017
PPP1R3F	0	0.2687	0.8494	1	NC	No	No	1	PPP1R3F_exon_chrX:49142295	1	1	0	NA	1	1	1	1	NA	PPP1R3F_exon_chrX:49142295
SAMD15	0	0.3005	0.8494	1	NC	No	No	1	SAMD15_exon_chr14:77857350	1	1	0	NA	1	1	1	1	NA	SAMD15_exon_chr14:77857350
BTG3-AS1	0	0.341	0.8494	1	NC	No	No	1	BTG3-AS1_exon_chr21:18984003	1	1	0	NA	1	1	1	1	NA	BTG3-AS1_exon_chr21:18984003
CXCL1	0	0.341	0.8494	1	NC	No	No	1	CXCL1_exon_chr4:74736237	1	1	0	NA	1	1	1	1	NA	CXCL1_exon_chr4:74736237
SNORA105C	34.7671	63.2711	0.849	0.0416	UP	No	Yes	1	SNORA105C_exon_chr12:56906648	1	1	0	NA	3	0.2822	0.158	-0.1241	Shortening	SNORA105C_exon_chr12:56906648
PCNX2	10.2756	18.9362	0.8488	0.3109	NC	No	No	2	PCNX2_exon_chr1:233120223_x000D_ PCNX2_exon_chr1:233430249	1.0_x000D_ 0.0	0.9354_x000D_ 0.0646	-0.0646_x000D_ 0.0646	NA_x000D_ NA	1_x000D_ 1	1.0_x000D_ 1.0	1.0_x000D_ 1.0	1.0_x000D_ 1.0	NA_x000D_ NA	PCNX2_exon_chr1:233120223	PCNX2_exon_chr1:233430249
SNAR-B2	1974.21	3556.4	0.8488	0.2537	NC	No	No	2	SNAR-B2_exon_chr19:50637121_x000D_ SNAR-B2_exon_chr19:50642494	0.5818_x000D_ 0.4182	0.583_x000D_ 0.417	0.0012_x000D_ -0.0012	NA_x000D_ NA	1_x000D_ 1	1.0_x000D_ 1.0	1.0_x000D_ 1.0	1.0_x000D_ 1.0	NA_x000D_ NA	SNAR-B2_exon_chr19:50637121	SNAR-B2_exon_chr19:50642494
MPP1	14.592	25.9736	0.8485	0.3658	NC	No	No	1	MPP1_exon_chrX:154007628	1	1	0	NA	1	1	1	1	NA	MPP1_exon_chrX:154007628
L1CAM	10.5544	19.2428	0.8485	0.3653	NC	No	No	1	L1CAM_exon_chrX:153128349	1	1	0	NA	2	NA	NA	NA	NA	L1CAM_exon_chrX:153128349
BMS1P20	49.4355	90.0567	0.8484	0.0589	UP	No	No	1	BMS1P20_exon_chr22:22658307	1	1	0	NA	1	1	1	1	NA	BMS1P20_exon_chr22:22658307
SLC22A17	6.6845	12.4262	0.8482	0.5153	NC	No	No	1	SLC22A17_exon_chr14:23816145	1	1	0	NA	1	1	1	1	NA	SLC22A17_exon_chr14:23816145
DIP2C	26.7473	48.0478	0.8467	0.0541	UP	No	Yes	1	DIP2C_exon_chr10:323517	1	1	0	NA	4	0.8105	0.1261	-0.6844	Shortening	DIP2C_exon_chr10:323517
SEL1L	58.6241	104.413	0.8463	0.0061	UP	No	Yes	1	SEL1L_exon_chr14:81943525	1	1	0	NA	8	0.9155	0.3081	-0.6075	Both	SEL1L_exon_chr14:81943525
SYCE1L	12.0081	21.361	0.8462	0.3711	NC	No	No	1	SYCE1L_exon_chr16:77246753	1	1	0	NA	1	1	1	1	NA	SYCE1L_exon_chr16:77246753
STK40	23.6896	42.2082	0.8462	0.1503	NC	No	Yes	1	STK40_exon_chr1:36807574	1	1	0	NA	4	0.5195	0.3305	-0.189	Both	STK40_exon_chr1:36807574
TWSG1	82.6349	148.954	0.8456	0.0035	UP	No	Yes	1	TWSG1_exon_chr18:9399343	1	1	0	NA	3	0.8981	0.2866	-0.6115	Shortening	TWSG1_exon_chr18:9399343
SPAG4	1.3464	2.358	0.8454	1	NC	No	No	1	SPAG4_exon_chr20:34208797	1	1	0	NA	1	1	1	1	NA	SPAG4_exon_chr20:34208797
NCOA2	15.6375	28.4068	0.8454	0.3457	NC	No	Yes	3	NCOA2_exon_chr8:71025878_x000D_ NCOA2_exon_chr8:71069475_x000D_ NCOA2_exon_chr8:71078989	0.5636_x000D_ 0.3705_x000D_ 0.0659	0.6547_x000D_ 0.3139_x000D_ 0.0314	0.0911_x000D_ -0.0566_x000D_ -0.0345	NA_x000D_ NA_x000D_ NA	1_x000D_ 4_x000D_ 1	1.0_x000D_ NA_x000D_ 1.0	1.0_x000D_ NA_x000D_ 1.0	1.0_x000D_ NA_x000D_ 1.0	NA_x000D_ Both_x000D_ NA	NCOA2_exon_chr8:71025878	NCOA2_exon_chr8:71069475	NCOA2_exon_chr8:71078989
FHIT	2.1953	3.7944	0.8452	1	NC	No	No	2	FHIT_exon_chr3:59738047_x000D_ FHIT_exon_chr3:60685856	0.5302_x000D_ 0.4698	0.5515_x000D_ 0.4485	0.0214_x000D_ -0.0214	NA_x000D_ NA	1_x000D_ 1	1.0_x000D_ 1.0	1.0_x000D_ 1.0	1.0_x000D_ 1.0	NA_x000D_ NA	FHIT_exon_chr3:59738047	FHIT_exon_chr3:60685856
PRRC2B	126.38	228.323	0.8452	0.0004	UP	No	Yes	1	PRRC2B_exon_chr9:134371126	1	1	0	NA	5	0.6351	0.4457	-0.1894	Shortening	PRRC2B_exon_chr9:134371126
LRP12	5.8717	10.6428	0.8444	0.572	NC	No	No	1	LRP12_exon_chr8:105503767	1	1	0	NA	3	NA	NA	NA	NA	LRP12_exon_chr8:105503767
PRR34-AS1	47.1627	84.7765	0.8442	0.0108	UP	No	No	1	PRR34-AS1_exon_chr22:46452941	1	1	0	NA	1	1	1	1	NA	PRR34-AS1_exon_chr22:46452941
GLUD1	146.768	263.988	0.8442	0	UP	No	Yes	1	GLUD1_exon_chr10:88811627	1	1	0	NA	5	0.7835	0.5176	-0.2659	Shortening	GLUD1_exon_chr10:88811627
ZBTB10	22.355	39.5289	0.8439	0.0841	UP	No	Yes	1	ZBTB10_exon_chr8:81431457	1	1	0	NA	8	0.4362	0.2211	-0.2151	Both	ZBTB10_exon_chr8:81431457
PBX3	6.1988	11.3685	0.8438	0.6454	NC	No	Yes	1	PBX3_exon_chr9:128728109	1	1	0	NA	2	NA	NA	NA	Shortening	PBX3_exon_chr9:128728109
NAPG	102.742	183.733	0.8436	0.0022	UP	No	Yes	1	NAPG_exon_chr18:10550073	1	1	0	NA	5	0.8392	0.0683	-0.7708	Shortening	NAPG_exon_chr18:10550073
SGSH	17.1185	31.0757	0.8434	0.3492	NC	No	No	1	SGSH_exon_chr17:78184986	1	1	0	NA	1	1	1	1	NA	SGSH_exon_chr17:78184986
ADAM22	28.3993	51.8133	0.8433	0.0551	UP	No	Yes	2	ADAM22_exon_chr7:87811272_x000D_ ADAM22_exon_chr7:87825785	0.0_x000D_ 1.0	0.1877_x000D_ 0.8123	0.1877_x000D_ -0.1877	Up_x000D_ NA	5_x000D_ 1	0.3578_x000D_ 1.0	0.0853_x000D_ 1.0	-0.2725_x000D_ 1.0	Both_x000D_ NA	ADAM22_exon_chr7:87811272	ADAM22_exon_chr7:87825785
CRACD	14.5338	26.7072	0.8432	0.2736	NC	No	No	1	CRACD_exon_chr4:57193809	1	1	0	NA	3	0.767	0.6563	-0.1107	NA	CRACD_exon_chr4:57193809
PPP6R2	58.1561	104.608	0.8431	0.0151	UP	No	Yes	1	PPP6R2_exon_chr22:50882627	1	1	0	NA	2	0.2263	0.0774	-0.1488	Shortening	PPP6R2_exon_chr22:50882627
STAMBPL1	17.7726	32.3562	0.843	0.1908	NC	No	No	1	STAMBPL1_exon_chr10:90682924	1	1	0	NA	1	1	1	1	NA	STAMBPL1_exon_chr10:90682924
P2RX5	7.4365	13.5327	0.8429	0.4598	NC	No	No	1	P2RX5_exon_chr17:3577171	1	1	0	NA	1	1	1	1	NA	P2RX5_exon_chr17:3577171
USP25	16.2776	28.5743	0.8428	0.2696	NC	No	Yes	1	USP25_exon_chr21:17250621	1	1	0	NA	3	NA	NA	NA	Both	USP25_exon_chr21:17250621
RABGEF1	56.7097	101.538	0.8427	0.0071	UP	No	Yes	2	RABGEF1_exon_chr7:66150346_x000D_ RABGEF1_exon_chr7:66272824	0.1397_x000D_ 0.8603	0.0405_x000D_ 0.9595	-0.0992_x000D_ 0.0992	NA_x000D_ NA	4_x000D_ 1	0.7362_x000D_ 1.0	0.0512_x000D_ 1.0	-0.685_x000D_ 1.0	Shortening_x000D_ NA	RABGEF1_exon_chr7:66150346	RABGEF1_exon_chr7:66272824
IRF1	52.3918	93.4657	0.8425	0.1019	NC	No	No	2	IRF1_exon_chr5:131819767_x000D_ IRF1_exon_chr5:131822822	0.511_x000D_ 0.489	0.6057_x000D_ 0.3943	0.0946_x000D_ -0.0946	NA_x000D_ NA	3_x000D_ 1	0.1114_x000D_ 1.0	0.1179_x000D_ 1.0	0.0064_x000D_ 1.0	NA_x000D_ NA	IRF1_exon_chr5:131819767	IRF1_exon_chr5:131822822
LRCH3	25.135	45.4129	0.8421	0.0628	UP	No	No	1	LRCH3_exon_chr3:197607382	1	1	0	NA	3	0.1722	0.1229	-0.0493	NA	LRCH3_exon_chr3:197607382
RNF139	23.1581	41.7737	0.8414	0.09	UP	No	Yes	1	RNF139_exon_chr8:125498071	1	1	0	NA	5	0.8102	0.798	-0.0122	Both	RNF139_exon_chr8:125498071
TTC39B	8.9642	15.7432	0.8413	0.3986	NC	No	Yes	2	TTC39B_exon_chr9:15172107_x000D_ TTC39B_exon_chr9:15211395	0.6689_x000D_ 0.3311	0.6529_x000D_ 0.3471	-0.016_x000D_ 0.016	NA_x000D_ NA	1_x000D_ 4	1.0_x000D_ NA	1.0_x000D_ NA	1.0_x000D_ NA	NA_x000D_ Shortening	TTC39B_exon_chr9:15172107	TTC39B_exon_chr9:15211395
SCFD1	62.5766	113.305	0.841	0.0677	UP	No	No	2	SCFD1_exon_chr14:31144189_x000D_ SCFD1_exon_chr14:31204791	0.135_x000D_ 0.865	0.0981_x000D_ 0.9019	-0.0369_x000D_ 0.0369	NA_x000D_ NA	1_x000D_ 1	1.0_x000D_ 1.0	1.0_x000D_ 1.0	1.0_x000D_ 1.0	NA_x000D_ NA	SCFD1_exon_chr14:31144189	SCFD1_exon_chr14:31204791
DICER1-AS1	5.1435	9.23	0.8409	0.6958	NC	No	No	1	DICER1-AS1_exon_chr14:95645840	1	1	0	NA	1	1	1	1	NA	DICER1-AS1_exon_chr14:95645840
BTBD7	50.9712	90.4717	0.8408	0.006	UP	Yes	Yes	3	BTBD7_exon_chr14:93709434_x000D_ BTBD7_exon_chr14:93755053_x000D_ BTBD7_exon_chr14:93761283	0.6013_x000D_ 0.1903_x000D_ 0.2085	0.3524_x000D_ 0.4586_x000D_ 0.189	-0.2489_x000D_ 0.2683_x000D_ -0.0195	NA_x000D_ Up_x000D_ NA	2_x000D_ 1_x000D_ 5	NA_x000D_ 1.0_x000D_ 0.69	NA_x000D_ 1.0_x000D_ 0.3779	NA_x000D_ 1.0_x000D_ -0.3121	Lengthening_x000D_ NA_x000D_ Both	BTBD7_exon_chr14:93709434	BTBD7_exon_chr14:93755053	BTBD7_exon_chr14:93761283
KCTD21	5.5674	9.7475	0.8404	0.588	NC	No	No	1	KCTD21_exon_chr11:77885629	1	1	0	NA	2	NA	NA	NA	NA	KCTD21_exon_chr11:77885629
AJUBA	23.5481	43.0114	0.8404	0.175	NC	No	No	2	AJUBA_exon_chr14:23442777_x000D_ AJUBA_exon_chr14:23448245	0.9671_x000D_ 0.0329	0.9081_x000D_ 0.0919	-0.059_x000D_ 0.059	NA_x000D_ NA	1_x000D_ 3	1.0_x000D_ NA	1.0_x000D_ NA	1.0_x000D_ NA	NA_x000D_ NA	AJUBA_exon_chr14:23442777	AJUBA_exon_chr14:23448245
KRT80	4.0034	7.2909	0.8399	0.7024	NC	No	No	1	KRT80_exon_chr12:52565341	1	1	0	NA	2	NA	NA	NA	NA	KRT80_exon_chr12:52565341
PLEKHM1	4.3557	8.1638	0.8394	0.6655	NC	No	No	1	PLEKHM1_exon_chr17:43515335	1	1	0	NA	1	1	1	1	NA	PLEKHM1_exon_chr17:43515335
MRPL50	59.7167	105.47	0.8394	0.0214	UP	No	Yes	1	MRPL50_exon_chr9:104153132	1	1	0	NA	4	0.9872	0.8444	-0.1429	Shortening	MRPL50_exon_chr9:104153132
HOXC9	36.9481	65.933	0.8393	0.0595	UP	No	No	1	HOXC9_exon_chr12:54396213	1	1	0	NA	2	0.0918	0.0561	-0.0357	NA	HOXC9_exon_chr12:54396213
TMEM19	44.019	78.0674	0.8391	0.0326	UP	No	Yes	1	TMEM19_exon_chr12:72094611	1	1	0	NA	7	0.8565	0.9705	0.114	Lengthening	TMEM19_exon_chr12:72094611
ETS1	13.4421	24.456	0.8388	0.3141	NC	No	Yes	1	ETS1_exon_chr11:128332471	1	1	0	NA	3	NA	NA	NA	Shortening	ETS1_exon_chr11:128332471
LOC105377621	28.891	50.9678	0.8388	0.174	NC	No	No	1	LOC105377621_exon_chr4:103340145	1	1	0	NA	2	0.226	0.1579	-0.068	NA	LOC105377621_exon_chr4:103340145
IGF2BP3	132.757	237.375	0.8388	0.0001	UP	No	Yes	2	IGF2BP3_exon_chr7:23352079_x000D_ IGF2BP3_exon_chr7:23385681	0.8761_x000D_ 0.1239	0.8782_x000D_ 0.1218	0.0021_x000D_ -0.0021	NA_x000D_ NA	1_x000D_ 8	1.0_x000D_ 0.9147	1.0_x000D_ 0.6553	1.0_x000D_ -0.2594	NA_x000D_ Both	IGF2BP3_exon_chr7:23352079	IGF2BP3_exon_chr7:23385681
GNPNAT1	56.3481	101.296	0.8385	0.0173	UP	No	Yes	1	GNPNAT1_exon_chr14:53245176	1	1	0	NA	4	0.4941	0.1139	-0.3802	Both	GNPNAT1_exon_chr14:53245176
ZNF564	11.7779	20.8875	0.8384	0.6113	NC	No	No	1	ZNF564_exon_chr19:12638730	1	1	0	NA	3	NA	NA	NA	NA	ZNF564_exon_chr19:12638730
BST1	1.9172	3.5457	0.8371	1	NC	No	No	1	BST1_exon_chr4:15733362	1	1	0	NA	1	1	1	1	NA	BST1_exon_chr4:15733362
MYADM	56.1885	100.752	0.8371	0.0095	UP	No	Yes	1	MYADM_exon_chr19:54376781	1	1	0	NA	3	0.7046	0.419	-0.2856	Shortening	MYADM_exon_chr19:54376781
ZNF77	6.5271	11.8071	0.8366	0.7938	NC	No	No	1	ZNF77_exon_chr19:2934813	1	1	0	NA	1	1	1	1	NA	ZNF77_exon_chr19:2934813
ATXN3	48.8608	87.6305	0.8359	0.0496	UP	No	Yes	1	ATXN3_exon_chr14:92530758	1	1	0	NA	4	0.1478	0.0543	-0.0935	Shortening	ATXN3_exon_chr14:92530758
AP4E1	10.0811	17.9913	0.8352	0.4465	NC	No	No	1	AP4E1_exon_chr15:51294698	1	1	0	NA	2	NA	NA	NA	NA	AP4E1_exon_chr15:51294698
PHACTR2	170.007	303.641	0.8348	0.0001	UP	Yes	Yes	2	PHACTR2_exon_chr6:144098464_x000D_ PHACTR2_exon_chr6:144144810	0.6511_x000D_ 0.3157	0.5226_x000D_ 0.4364	-0.1285_x000D_ 0.1206	Down_x000D_ Up	1_x000D_ 8	1.0_x000D_ 0.2697	1.0_x000D_ 0.0429	1.0_x000D_ -0.2268	NA_x000D_ Both	PHACTR2_exon_chr6:144098464	PHACTR2_exon_chr6:144144810
LONRF2	1.3827	2.3725	0.8347	1	NC	No	No	1	LONRF2_exon_chr2:100900954	1	1	0	NA	2	NA	NA	NA	NA	LONRF2_exon_chr2:100900954
CLSTN1	166.224	296.661	0.8347	0.0005	UP	No	Yes	1	CLSTN1_exon_chr1:9790763	1	1	0	NA	2	0.6637	0.3407	-0.3229	Shortening	CLSTN1_exon_chr1:9790763
ZDHHC16	61.3976	110.236	0.8345	0.0609	UP	No	No	1	ZDHHC16_exon_chr10:99216533	1	1	0	NA	1	1	1	1	NA	ZDHHC16_exon_chr10:99216533
C6orf52	7.629	13.3828	0.8342	0.5419	NC	No	No	1	C6orf52_exon_chr6:10671831	1	1	0	NA	1	1	1	1	NA	C6orf52_exon_chr6:10671831
CCNJ	26.2504	46.5564	0.834	0.1279	NC	No	Yes	1	CCNJ_exon_chr10:97817586	1	1	0	NA	5	0.9475	0.7	-0.2474	Both	CCNJ_exon_chr10:97817586
PTPN21	5.1435	9.1837	0.8329	0.6	NC	No	Yes	1	PTPN21_exon_chr14:88934609	1	1	0	NA	2	NA	NA	NA	Shortening	PTPN21_exon_chr14:88934609
LAMP3	1.8313	3.1933	0.8325	1	NC	No	No	1	LAMP3_exon_chr3:182842002	1	1	0	NA	1	1	1	1	NA	LAMP3_exon_chr3:182842002
PMP22	39.0509	69.8942	0.8325	0.1024	NC	No	Yes	1	PMP22_exon_chr17:15134397	1	1	0	NA	2	0.9806	0.7938	-0.1868	Shortening	PMP22_exon_chr17:15134397
SLC46A3	4.4877	7.7936	0.8321	0.6829	NC	No	No	1	SLC46A3_exon_chr13:29275718	1	1	0	NA	2	NA	NA	NA	NA	SLC46A3_exon_chr13:29275718
ARSB	9.182	15.8671	0.8321	0.4785	NC	No	Yes	1	ARSB_exon_chr5:78076485	1	1	0	NA	2	NA	NA	NA	Shortening	ARSB_exon_chr5:78076485
ZNF589	5.1801	9.3423	0.832	0.7342	NC	No	No	1	ZNF589_exon_chr3:48309404	1	1	0	NA	1	1	1	1	NA	ZNF589_exon_chr3:48309404
MARCHF5	113.769	201.668	0.8317	0.0005	UP	No	Yes	1	MARCHF5_exon_chr10:94110847	1	1	0	NA	7	0.2254	0.0944	-0.1311	Both	MARCHF5_exon_chr10:94110847
PLEKHA8P1	1.0915	1.8437	0.8313	1	NC	No	No	1	PLEKHA8P1_exon_chr12:45568425	1	1	0	NA	1	1	1	1	NA	PLEKHA8P1_exon_chr12:45568425
MAD1L1	8.298	15.0527	0.8312	0.4101	NC	No	No	1	MAD1L1_exon_chr7:1855864	1	1	0	NA	1	1	1	1	NA	MAD1L1_exon_chr7:1855864
PRSS3	48.5574	86.0167	0.8306	0.0087	UP	No	No	1	PRSS3_exon_chr9:33799025	1	1	0	NA	1	1	1	1	NA	PRSS3_exon_chr9:33799025
SDCBP	123.374	217.78	0.83	0.0049	UP	No	Yes	1	SDCBP_exon_chr8:59494244	1	1	0	NA	2	0.9324	0.7702	-0.1621	Shortening	SDCBP_exon_chr8:59494244
GPR39	9.6065	16.6132	0.8294	0.3973	NC	No	No	1	GPR39_exon_chr2:133402673	1	1	0	NA	1	1	1	1	NA	GPR39_exon_chr2:133402673
ZNF431	15.4426	27.5101	0.829	0.2558	NC	No	Yes	1	ZNF431_exon_chr19:21365425	1	1	0	NA	2	0.456	0.0717	-0.3843	Shortening	ZNF431_exon_chr19:21365425
BBS4	27.6551	48.0191	0.8289	0.0796	UP	No	Yes	1	BBS4_exon_chr15:73029818	1	1	0	NA	2	0.7505	0.6484	-0.1021	Shortening	BBS4_exon_chr15:73029818
TRIB3	80.2221	142.986	0.8285	0.0434	UP	No	No	1	TRIB3_exon_chr20:376841	1	1	0	NA	1	1	1	1	NA	TRIB3_exon_chr20:376841
CPLANE2	2.3053	4.3376	0.8283	0.7634	NC	No	No	1	CPLANE2_exon_chr1:16558792	1	1	0	NA	1	1	1	1	NA	CPLANE2_exon_chr1:16558792
MAPK8IP1	11.828	21.3815	0.8276	0.2996	NC	No	No	1	MAPK8IP1_exon_chr11:45927199	1	1	0	NA	1	1	1	1	NA	MAPK8IP1_exon_chr11:45927199
HPSE	29.0152	51.0155	0.8276	0.1079	NC	No	Yes	1	HPSE_exon_chr4:84216656	1	1	0	NA	2	0.6121	0.1423	-0.4698	Shortening	HPSE_exon_chr4:84216656
TSPAN15	19.2495	33.3701	0.8272	0.1964	NC	No	No	1	TSPAN15_exon_chr10:71266584	1	1	0	NA	1	1	1	1	NA	TSPAN15_exon_chr10:71266584
PIP4K2A	57.2361	102.731	0.8271	0.023	UP	No	Yes	1	PIP4K2A_exon_chr10:22826210	1	1	0	NA	6	0.8165	0.3509	-0.4657	Shortening	PIP4K2A_exon_chr10:22826210
NSMCE3	37.4112	66.1983	0.8265	0.094	UP	No	Yes	1	NSMCE3_exon_chr15:29562026	1	1	0	NA	2	0.3315	0.1161	-0.2154	Shortening	NSMCE3_exon_chr15:29562026
LSMEM1	7.1825	13.2671	0.8263	0.5888	NC	No	No	1	LSMEM1_exon_chr7:112129864	1	1	0	NA	1	1	1	1	NA	LSMEM1_exon_chr7:112129864
NUTM2A-AS1	33.2503	59.1094	0.8253	0.0874	UP	No	No	1	NUTM2A-AS1_exon_chr10:88998629	1	1	0	NA	1	1	1	1	NA	NUTM2A-AS1_exon_chr10:88998629
SYK	7.2779	12.7928	0.8248	0.6953	NC	No	No	1	SYK_exon_chr9:93657809	1	1	0	NA	2	NA	NA	NA	NA	SYK_exon_chr9:93657809
USP47	79.9899	142.845	0.8246	0.0024	UP	Yes	Yes	3	USP47_exon_chr11:11954550_x000D_ USP47_exon_chr11:11955377_x000D_ USP47_exon_chr11:11977547	0.2462_x000D_ 0.1274_x000D_ 0.5967	0.1413_x000D_ 0.0673_x000D_ 0.7545	-0.1049_x000D_ -0.0601_x000D_ 0.1578	NA_x000D_ NA_x000D_ Up	1_x000D_ 6_x000D_ 1	1.0_x000D_ 0.5172_x000D_ 1.0	1.0_x000D_ 0.5035_x000D_ 1.0	1.0_x000D_ -0.0137_x000D_ 1.0	NA_x000D_ Both_x000D_ NA	USP47_exon_chr11:11954550	USP47_exon_chr11:11955377	USP47_exon_chr11:11977547
LOC100289361	3.2504	5.5108	0.8237	0.8473	NC	No	No	1	LOC100289361_exon_chr3:142720309	1	1	0	NA	2	NA	NA	NA	NA	LOC100289361_exon_chr3:142720309
ZFHX3	11.2337	20.0114	0.823	0.3903	NC	No	No	1	ZFHX3_exon_chr16:72822747	1	1	0	NA	5	NA	NA	NA	NA	ZFHX3_exon_chr16:72822747
ANKHD1-EIF4EBP3	25.3767	44.9191	0.8229	0.0875	UP	No	No	1	ANKHD1-EIF4EBP3_exon_chr5:139928818	1	1	0	NA	1	1	1	1	NA	ANKHD1-EIF4EBP3_exon_chr5:139928818
DIP2B	47.0799	83.8493	0.8225	0.0233	UP	No	Yes	1	DIP2B_exon_chr12:51138369	1	1	0	NA	4	0.9143	0.3803	-0.534	Shortening	DIP2B_exon_chr12:51138369
LOC100335030	11.7053	20.7139	0.8224	0.5516	NC	No	No	1	LOC100335030_exon_chr12:49782956	1	1	0	NA	1	1	1	1	NA	LOC100335030_exon_chr12:49782956
SYNPO	2.9476	5.2016	0.8216	1	NC	No	No	2	SYNPO_exon_chr5:150027505_x000D_ SYNPO_exon_chr5:150035965	0.5552_x000D_ 0.4448	0.69_x000D_ 0.31	0.1348_x000D_ -0.1348	NA_x000D_ NA	1_x000D_ 1	1.0_x000D_ 1.0	1.0_x000D_ 1.0	1.0_x000D_ 1.0	NA_x000D_ NA	SYNPO_exon_chr5:150027505	SYNPO_exon_chr5:150035965
KATNA1	29.1986	51.5561	0.82	0.081	UP	Yes	Yes	2	KATNA1_exon_chr6:149916370_x000D_ KATNA1_exon_chr6:149944419	0.6961_x000D_ 0.3039	0.8927_x000D_ 0.1073	0.1966_x000D_ -0.1966	Up_x000D_ NA	1_x000D_ 2	1.0_x000D_ NA	1.0_x000D_ NA	1.0_x000D_ NA	NA_x000D_ Shortening	KATNA1_exon_chr6:149916370	KATNA1_exon_chr6:149944419
AMER1	1.9529	3.462	0.8182	1	NC	No	No	1	AMER1_exon_chrX:63413264	1	1	0	NA	1	1	1	1	NA	AMER1_exon_chrX:63413264
CYP20A1	8.6607	15.2816	0.8178	0.566	NC	No	Yes	1	CYP20A1_exon_chr2:204161480	1	1	0	NA	3	NA	NA	NA	Shortening	CYP20A1_exon_chr2:204161480
WASF1	30.5055	53.2383	0.8178	0.1044	NC	No	No	1	WASF1_exon_chr6:110421882	1	1	0	NA	2	0.9449	0.6023	-0.3426	NA	WASF1_exon_chr6:110421882
RRP8	13.818	24.6406	0.8169	0.3247	NC	No	No	2	RRP8_exon_chr11:6621495_x000D_ RRP8_exon_chr11:6623445	0.7974_x000D_ 0.2026	0.9381_x000D_ 0.0619	0.1407_x000D_ -0.1407	NA_x000D_ NA	1_x000D_ 1	1.0_x000D_ 1.0	1.0_x000D_ 1.0	1.0_x000D_ 1.0	NA_x000D_ NA	RRP8_exon_chr11:6621495	RRP8_exon_chr11:6623445
FBXO4	13.5	23.3202	0.8168	0.3098	NC	No	No	2	FBXO4_exon_chr5:41934047_x000D_ FBXO4_exon_chr5:41941293	0.0261_x000D_ 0.9739	0.0351_x000D_ 0.9649	0.0091_x000D_ -0.0091	NA_x000D_ NA	1_x000D_ 1	1.0_x000D_ 1.0	1.0_x000D_ 1.0	1.0_x000D_ 1.0	NA_x000D_ NA	FBXO4_exon_chr5:41934047	FBXO4_exon_chr5:41941293
DCTD	94.1649	167.5	0.816	0.0077	UP	No	Yes	1	DCTD_exon_chr4:183812630	1	1	0	NA	5	0.8041	0.2957	-0.5084	Shortening	DCTD_exon_chr4:183812630
HOXD4	1.4075	2.5862	0.8159	1	NC	No	No	1	HOXD4_exon_chr2:177017335	1	1	0	NA	1	1	1	1	NA	HOXD4_exon_chr2:177017335
CBLC	24.5382	42.9944	0.8153	0.1677	NC	No	No	1	CBLC_exon_chr19:45303807	1	1	0	NA	1	1	1	1	NA	CBLC_exon_chr19:45303807
NDUFAF3	116.723	206.258	0.8148	0.0043	UP	No	No	1	NDUFAF3_exon_chr3:49060488	1	1	0	NA	1	1	1	1	NA	NDUFAF3_exon_chr3:49060488
SUCLG2-AS1	0.2548	0.6416	0.8147	1	NC	No	No	1	SUCLG2-AS1_exon_chr3:67797194	1	1	0	NA	1	1	1	1	NA	SUCLG2-AS1_exon_chr3:67797194
LINC00491	4.1846	7.1085	0.8147	0.8955	NC	No	No	1	LINC00491_exon_chr5:101945470	1	1	0	NA	1	1	1	1	NA	LINC00491_exon_chr5:101945470
GAD1	11.1952	19.0725	0.8139	0.3879	NC	No	No	2	GAD1_exon_chr2:171699078_x000D_ GAD1_exon_chr2:171716218	0.4272_x000D_ 0.5728	0.7652_x000D_ 0.2348	0.338_x000D_ -0.338	NA_x000D_ NA	1_x000D_ 1	1.0_x000D_ 1.0	1.0_x000D_ 1.0	1.0_x000D_ 1.0	NA_x000D_ NA	GAD1_exon_chr2:171699078	GAD1_exon_chr2:171716218
RBM43	7.2525	12.4002	0.8131	0.6176	NC	No	No	2	RBM43_exon_chr2:152108178_x000D_ RBM43_exon_chr2:152112257	0.4418_x000D_ 0.5582	0.5045_x000D_ 0.4955	0.0627_x000D_ -0.0627	NA_x000D_ NA	3_x000D_ 1	NA_x000D_ 1.0	NA_x000D_ 1.0	NA_x000D_ 1.0	NA_x000D_ NA	RBM43_exon_chr2:152108178	RBM43_exon_chr2:152112257
FBXO3	42.969	75.9489	0.8131	0.1027	NC	No	Yes	1	FBXO3_exon_chr11:33768866	1	1	0	NA	6	0.664	0.6367	-0.0272	Both	FBXO3_exon_chr11:33768866
MUC1	2.4262	4.4677	0.813	0.7694	NC	No	No	1	MUC1_exon_chr1:155158685	1	1	0	NA	1	1	1	1	NA	MUC1_exon_chr1:155158685
KLHL8	32.2665	56.5615	0.8128	0.1165	NC	No	Yes	1	KLHL8_exon_chr4:88084794	1	1	0	NA	7	0.7412	0.5365	-0.2046	Both	KLHL8_exon_chr4:88084794
CHTF18	31.0781	54.2573	0.8127	0.0949	UP	No	No	1	CHTF18_exon_chr16:847838	1	1	0	NA	1	1	1	1	NA	CHTF18_exon_chr16:847838
IRX5	2.2442	3.9503	0.8124	1	NC	No	No	1	IRX5_exon_chr16:54966988	1	1	0	NA	2	NA	NA	NA	NA	IRX5_exon_chr16:54966988
SYPL1	177.578	311.592	0.812	0.0001	UP	No	Yes	1	SYPL1_exon_chr7:105732385	1	1	0	NA	4	0.871	0.2577	-0.6133	Shortening	SYPL1_exon_chr7:105732385
FRG1BP	16.729	29.252	0.8108	0.3974	NC	No	No	3	FRG1BP_exon_chr20:29628226_x000D_ FRG1BP_exon_chr20:29631537_x000D_ FRG1BP_exon_chr20:29633897	0.6215_x000D_ 0.2132_x000D_ 0.1653	0.418_x000D_ 0.4838_x000D_ 0.0983	-0.2036_x000D_ 0.2706_x000D_ -0.067	NA_x000D_ NA_x000D_ NA	1_x000D_ 2_x000D_ 1	1.0_x000D_ NA_x000D_ 1.0	1.0_x000D_ NA_x000D_ 1.0	1.0_x000D_ NA_x000D_ 1.0	NA_x000D_ NA_x000D_ NA	FRG1BP_exon_chr20:29628226	FRG1BP_exon_chr20:29631537	FRG1BP_exon_chr20:29633897
LOC105369201	23.8235	41.4192	0.8103	0.1322	NC	No	No	1	LOC105369201_exon_chr15:101390415	1	1	0	NA	2	0.0485	0.0823	0.0337	NA	LOC105369201_exon_chr15:101390415
PANX1	32.7154	57.3871	0.8101	0.1036	NC	No	No	1	PANX1_exon_chr11:93913955	1	1	0	NA	2	0.7389	0.8055	0.0665	NA	PANX1_exon_chr11:93913955
ZNRF2	25.2648	43.4354	0.8096	0.2298	NC	No	Yes	1	ZNRF2_exon_chr7:30405650	1	1	0	NA	6	0.5026	0.3607	-0.1419	Shortening	ZNRF2_exon_chr7:30405650
ANXA6	48.6549	85.24	0.8094	0.0777	UP	No	No	1	ANXA6_exon_chr5:150481068	1	1	0	NA	1	1	1	1	NA	ANXA6_exon_chr5:150481068
MBOAT2	42.3828	73.8243	0.8089	0.0354	UP	No	Yes	1	MBOAT2_exon_chr2:8999034	1	1	0	NA	5	0.4338	0.1236	-0.3103	Shortening	MBOAT2_exon_chr2:8999034
MTMR10	7.2786	12.7725	0.808	0.5011	NC	No	Yes	1	MTMR10_exon_chr15:31234275	1	1	0	NA	2	NA	NA	NA	Shortening	MTMR10_exon_chr15:31234275
PLTP	4.3551	7.817	0.806	0.6693	NC	No	No	1	PLTP_exon_chr20:44527702	1	1	0	NA	1	1	1	1	NA	PLTP_exon_chr20:44527702
ARRDC3	36.0979	62.2165	0.8053	0.1	NC	No	Yes	1	ARRDC3_exon_chr5:90667273	1	1	0	NA	5	1	0.8568	-0.1432	Shortening	ARRDC3_exon_chr5:90667273
MED21	103.42	180.223	0.8051	0.0119	UP	No	Yes	1	MED21_exon_chr12:27181217	1	1	0	NA	8	0.657	0.2285	-0.4286	Both	MED21_exon_chr12:27181217
PHKB	31.0521	53.8278	0.8045	0.1681	NC	No	Yes	1	PHKB_exon_chr16:47733139	1	1	0	NA	6	0.6993	0.4064	-0.2929	Shortening	PHKB_exon_chr16:47733139
TMOD2	3.5541	6.2796	0.8038	0.7189	NC	No	Yes	1	TMOD2_exon_chr15:52100616	1	1	0	NA	3	NA	NA	NA	Both	TMOD2_exon_chr15:52100616
ALDH3B1	8.2127	14.4025	0.8038	0.5162	NC	No	No	1	ALDH3B1_exon_chr11:67795216	1	1	0	NA	1	1	1	1	NA	ALDH3B1_exon_chr11:67795216
PPHLN1	59.9836	103.503	0.8037	0.0185	UP	No	Yes	2	PPHLN1_exon_chr12:42835116_x000D_ PPHLN1_exon_chr12:42840393	0.5713_x000D_ 0.4287	0.5462_x000D_ 0.4538	-0.0251_x000D_ 0.0251	NA_x000D_ NA	2_x000D_ 3	0.9038_x000D_ 0.8619	0.8336_x000D_ 0.519	-0.0702_x000D_ -0.343	NA_x000D_ Both	PPHLN1_exon_chr12:42835116	PPHLN1_exon_chr12:42840393
PRSS12	12.337	21.6529	0.803	0.3524	NC	No	Yes	1	PRSS12_exon_chr4:119203398	1	1	0	NA	3	0.4533	0.1651	-0.2881	Shortening	PRSS12_exon_chr4:119203398
APTR	2.6206	4.7565	0.802	1	NC	No	No	1	APTR_exon_chr7:77313568	1	1	0	NA	1	1	1	1	NA	APTR_exon_chr7:77313568
MMP24OS	89.3062	156.255	0.8019	0.0019	UP	No	Yes	1	MMP24OS_exon_chr20:33865735	1	1	0	NA	4	0.5057	0.3558	-0.15	Shortening	MMP24OS_exon_chr20:33865735
KAT2B	3.9306	6.9352	0.8018	0.7387	NC	No	No	1	KAT2B_exon_chr3:20193823	1	1	0	NA	3	NA	NA	NA	NA	KAT2B_exon_chr3:20193823
DCUN1D1	62.3244	108.481	0.8017	0.0307	UP	No	Yes	1	DCUN1D1_exon_chr3:182662961	1	1	0	NA	11	0.7091	0.1589	-0.5502	Shortening	DCUN1D1_exon_chr3:182662961
UGCG	98.5421	173.299	0.8012	0.0124	UP	No	Yes	1	UGCG_exon_chr9:114695106	1	1	0	NA	4	0.9486	0.1649	-0.7837	Shortening	UGCG_exon_chr9:114695106
ABCC2	147.604	255.76	0.8009	0.011	UP	No	Yes	2	ABCC2_exon_chr10:101558963_x000D_ ABCC2_exon_chr10:101611258	0.1499_x000D_ 0.8501	0.1527_x000D_ 0.8473	0.0028_x000D_ -0.0028	NA_x000D_ NA	1_x000D_ 5	1.0_x000D_ 0.6241	1.0_x000D_ 0.077	1.0_x000D_ -0.5471	NA_x000D_ Shortening	ABCC2_exon_chr10:101558963	ABCC2_exon_chr10:101611258
SLC25A17	39.1487	69.1263	0.8006	0.1205	NC	No	Yes	1	SLC25A17_exon_chr22:41166985	1	1	0	NA	6	0.4943	0.1615	-0.3328	Shortening	SLC25A17_exon_chr22:41166985
PEX19	33.0915	57.8106	0.8003	0.0836	UP	No	Yes	1	PEX19_exon_chr1:160249424	1	1	0	NA	5	0.2503	0.1469	-0.1035	Shortening	PEX19_exon_chr1:160249424
GPRIN2	2.3286	3.797	0.8001	1	NC	No	No	1	GPRIN2_exon_chr10:46998874	1	1	0	NA	1	1	1	1	NA	GPRIN2_exon_chr10:46998874
THAP10	9.8015	16.9629	0.7998	0.4815	NC	No	No	1	THAP10_exon_chr15:71174989	1	1	0	NA	3	NA	NA	NA	NA	THAP10_exon_chr15:71174989
NEDD4	15.5772	27.7016	0.7998	0.3191	NC	No	Yes	1	NEDD4_exon_chr15:56122197	1	1	0	NA	3	NA	NA	NA	Shortening	NEDD4_exon_chr15:56122197
SNCG	26.9312	47.1546	0.7996	0.1304	NC	No	No	1	SNCG_exon_chr10:88722721	1	1	0	NA	1	1	1	1	NA	SNCG_exon_chr10:88722721
MICB	16.2317	28.5335	0.7992	0.3451	NC	No	No	1	MICB_exon_chr6:31477558	1	1	0	NA	1	1	1	1	NA	MICB_exon_chr6:31477558
CHMP2B	259.048	450.744	0.7992	0.0002	UP	No	Yes	3	CHMP2B_exon_chr3:87289848_x000D_ CHMP2B_exon_chr3:87294863_x000D_ CHMP2B_exon_chr3:87302861	0.4209_x000D_ 0.1221_x000D_ 0.4497	0.344_x000D_ 0.2525_x000D_ 0.391	-0.0769_x000D_ 0.1305_x000D_ -0.0588	NA_x000D_ NA_x000D_ NA	5_x000D_ 1_x000D_ 1	0.7437_x000D_ 1.0_x000D_ 1.0	0.2008_x000D_ 1.0_x000D_ 1.0	-0.5429_x000D_ 1.0_x000D_ 1.0	Shortening_x000D_ NA_x000D_ NA	CHMP2B_exon_chr3:87289848	CHMP2B_exon_chr3:87294863	CHMP2B_exon_chr3:87302861
LOC101929709	2.1837	3.8057	0.7991	1	NC	No	No	1	LOC101929709_exon_chr8:90729956	1	1	0	NA	1	1	1	1	NA	LOC101929709_exon_chr8:90729956
LINC02273	8.6841	14.7464	0.7988	0.6314	NC	No	No	1	LINC02273_exon_chr4:153024778	1	1	0	NA	1	1	1	1	NA	LINC02273_exon_chr4:153024778
RPIA	156.002	271.679	0.7984	0.0117	UP	No	Yes	1	RPIA_exon_chr2:89049497	1	1	0	NA	2	0.3143	0.0618	-0.2526	Shortening	RPIA_exon_chr2:89049497
SCLT1	64.6849	113.61	0.7982	0.0306	UP	No	No	5	SCLT1_exon_chr4:129805694_x000D_ SCLT1_exon_chr4:129869725_x000D_ SCLT1_exon_chr4:129880932_x000D_ SCLT1_exon_chr4:129891623_x000D_ SCLT1_exon_chr4:129961367	0.2132_x000D_ 0.2715_x000D_ 0.3368_x000D_ 0.1032_x000D_ 0.0613	0.1783_x000D_ 0.2975_x000D_ 0.2635_x000D_ 0.1869_x000D_ 0.0344	-0.0349_x000D_ 0.026_x000D_ -0.0733_x000D_ 0.0837_x000D_ -0.0269	NA_x000D_ NA_x000D_ NA_x000D_ NA_x000D_ NA	1_x000D_ 2_x000D_ 1_x000D_ 2_x000D_ 1	1.0_x000D_ NA_x000D_ 1.0_x000D_ 0.1843_x000D_ 1.0	1.0_x000D_ NA_x000D_ 1.0_x000D_ 0.1598_x000D_ 1.0	1.0_x000D_ NA_x000D_ 1.0_x000D_ -0.0245_x000D_ 1.0	NA_x000D_ NA_x000D_ NA_x000D_ NA_x000D_ NA	SCLT1_exon_chr4:129805694	SCLT1_exon_chr4:129869725	SCLT1_exon_chr4:129880932	SCLT1_exon_chr4:129891623	SCLT1_exon_chr4:129961367
PDGFRL	9.6307	16.5031	0.7981	0.4894	NC	No	No	1	PDGFRL_exon_chr8:17500121	1	1	0	NA	1	1	1	1	NA	PDGFRL_exon_chr8:17500121
LOC101927752	13.1619	22.9883	0.7976	0.2897	NC	No	No	1	LOC101927752_exon_chr8:1711094	1	1	0	NA	2	NA	NA	NA	NA	LOC101927752_exon_chr8:1711094
DENND1B	13.3907	22.5745	0.7975	0.327	NC	No	Yes	2	DENND1B_exon_chr1:197480102_x000D_ DENND1B_exon_chr1:197510145	0.5588_x000D_ 0.4412	0.7541_x000D_ 0.2459	0.1953_x000D_ -0.1953	NA_x000D_ NA	1_x000D_ 2	1.0_x000D_ NA	1.0_x000D_ NA	1.0_x000D_ NA	NA_x000D_ Shortening	DENND1B_exon_chr1:197480102	DENND1B_exon_chr1:197510145
WDR44	19.3706	33.1276	0.7972	0.2047	NC	No	Yes	1	WDR44_exon_chrX:117582855	1	1	0	NA	3	0.9601	0.6549	NA	Both	WDR44_exon_chrX:117582855
PLXNB1	20.0648	35.1075	0.797	0.2519	NC	No	No	1	PLXNB1_exon_chr3:48445997	1	1	0	NA	1	1	1	1	NA	PLXNB1_exon_chr3:48445997
BORCS7	40.1516	69.6722	0.7969	0.0446	UP	No	Yes	1	BORCS7_exon_chr10:104622629	1	1	0	NA	8	0.7455	0.291	-0.4545	Both	BORCS7_exon_chr10:104622629
HSDL2	53.9832	94.4001	0.7965	0.0223	UP	No	Yes	1	HSDL2_exon_chr9:115232711	1	1	0	NA	5	0.6379	0.1623	-0.4756	Shortening	HSDL2_exon_chr9:115232711
DUSP14	38.7716	67.7434	0.7952	0.082	UP	No	No	1	DUSP14_exon_chr17:35872282	1	1	0	NA	2	0.9102	0.8561	-0.0541	NA	DUSP14_exon_chr17:35872282
GATA6	7.6798	13.8737	0.7948	0.4424	NC	No	No	1	GATA6_exon_chr18:19780618	1	1	0	NA	4	NA	NA	NA	NA	GATA6_exon_chr18:19780618
ZNF138	33.7104	58.437	0.7944	0.099	UP	No	Yes	2	ZNF138_exon_chr7:64291828_x000D_ ZNF138_exon_chr7:64318584	0.9849_x000D_ 0.0151	0.9555_x000D_ 0.0445	-0.0293_x000D_ 0.0293	NA_x000D_ NA	3_x000D_ 1	0.5396_x000D_ 1.0	0.3285_x000D_ 1.0	-0.2111_x000D_ 1.0	Both_x000D_ NA	ZNF138_exon_chr7:64291828	ZNF138_exon_chr7:64318584
TTLL1	5.1917	8.9408	0.7939	0.6254	NC	No	No	1	TTLL1_exon_chr22:43435911	1	1	0	NA	1	1	1	1	NA	TTLL1_exon_chr22:43435911
PDX1	5.641	9.9844	0.7934	0.7007	NC	No	No	1	PDX1_exon_chr13:28498392	1	1	0	NA	1	1	1	1	NA	PDX1_exon_chr13:28498392
KAT6A	89.037	153.701	0.793	0.0065	UP	No	Yes	1	KAT6A_exon_chr8:41792385	1	1	0	NA	8	0.2871	0.306	0.019	Both	KAT6A_exon_chr8:41792385
DNASE1	9.1463	15.7434	0.7929	0.3586	NC	No	No	1	DNASE1_exon_chr16:3707906	1	1	0	NA	1	1	1	1	NA	DNASE1_exon_chr16:3707906
AKIRIN1	108.689	190.735	0.7927	0.0094	UP	No	Yes	1	AKIRIN1_exon_chr1:39469716	1	1	0	NA	5	0.8924	0.3053	-0.5871	Shortening	AKIRIN1_exon_chr1:39469716
SDC4	164.813	286.549	0.7926	0.0012	UP	No	Yes	1	SDC4_exon_chr20:43956055	1	1	0	NA	5	0.8551	0.6606	-0.1945	Both	SDC4_exon_chr20:43956055
LPXN	2.0257	3.4852	0.7924	1	NC	No	No	1	LPXN_exon_chr11:58295196	1	1	0	NA	1	1	1	1	NA	LPXN_exon_chr11:58295196
HKDC1	3.9422	6.8229	0.7924	0.8738	NC	No	No	1	HKDC1_exon_chr10:71026365	1	1	0	NA	1	1	1	1	NA	HKDC1_exon_chr10:71026365
INTU	11.7923	20.8987	0.7908	0.3881	NC	No	No	1	INTU_exon_chr4:128637479	1	1	0	NA	5	NA	NA	NA	NA	INTU_exon_chr4:128637479
QRICH1	84.2622	147.042	0.7908	0.0031	UP	No	Yes	1	QRICH1_exon_chr3:49068077	1	1	0	NA	6	0.8365	0.6957	-0.1408	Both	QRICH1_exon_chr3:49068077
BEGAIN	2.2805	3.9098	0.7907	0.7814	NC	No	No	1	BEGAIN_exon_chr14:101005652	1	1	0	NA	1	1	1	1	NA	BEGAIN_exon_chr14:101005652
SFMBT1	34.3677	60.0146	0.7907	0.1006	NC	No	No	1	SFMBT1_exon_chr3:52939292	1	1	0	NA	2	0.9741	0.8938	-0.0802	NA	SFMBT1_exon_chr3:52939292
TSPAN6	109.246	188.645	0.7904	0.0031	UP	No	Yes	1	TSPAN6_exon_chrX:99884983	1	1	0	NA	5	0.4481	0.0581	-0.3901	Shortening	TSPAN6_exon_chrX:99884983
LIMA1	362.7	628.986	0.7903	0.0004	UP	No	No	2	LIMA1_exon_chr12:50571852_x000D_ LIMA1_exon_chr12:50616441	0.731_x000D_ 0.269	0.7313_x000D_ 0.2687	0.0002_x000D_ -0.0002	NA_x000D_ NA	2_x000D_ 3	0.1586_x000D_ 0.7528	0.1378_x000D_ 0.7349	-0.0208_x000D_ -0.0178	NA_x000D_ NA	LIMA1_exon_chr12:50571852	LIMA1_exon_chr12:50616441
TRRAP	3.482	6.2678	0.7895	0.7271	NC	No	No	2	TRRAP_exon_chr7:98563318_x000D_ TRRAP_exon_chr7:98569421	0.2928_x000D_ 0.7072	0.1739_x000D_ 0.8261	-0.1189_x000D_ 0.1189	NA_x000D_ NA	1_x000D_ 1	1.0_x000D_ 1.0	1.0_x000D_ 1.0	1.0_x000D_ 1.0	NA_x000D_ NA	TRRAP_exon_chr7:98563318	TRRAP_exon_chr7:98569421
HPN	4.9616	8.675	0.7883	0.7966	NC	No	No	1	HPN_exon_chr19:35530700	1	1	0	NA	1	1	1	1	NA	HPN_exon_chr19:35530700
NR2F1-AS1	67.5902	116.079	0.7879	0.0119	UP	No	No	1	NR2F1-AS1_exon_chr5:92747215	1	1	0	NA	3	0.979	0.8929	-0.0861	NA	NR2F1-AS1_exon_chr5:92747215
CKAP2	306.773	529.776	0.7879	0.0077	UP	Yes	Yes	3	CKAP2_exon_chr13:53029494_x000D_ CKAP2_exon_chr13:53035030_x000D_ CKAP2_exon_chr13:53049029	0.1282_x000D_ 0.306_x000D_ 0.5497	0.1218_x000D_ 0.1224_x000D_ 0.7503	-0.0064_x000D_ -0.1836_x000D_ 0.2006	NA_x000D_ NA_x000D_ Up	1_x000D_ 4_x000D_ 1	1.0_x000D_ 0.5796_x000D_ 1.0	1.0_x000D_ 0.122_x000D_ 1.0	1.0_x000D_ -0.4576_x000D_ 1.0	NA_x000D_ Shortening_x000D_ NA	CKAP2_exon_chr13:53029494	CKAP2_exon_chr13:53035030	CKAP2_exon_chr13:53049029
ATAD3C	0.3881	0.6097	0.7871	1	NC	No	No	1	ATAD3C_exon_chr1:1403763	1	1	0	NA	1	1	1	1	NA	ATAD3C_exon_chr1:1403763
FGFR1OP2	53.3022	92.4319	0.7869	0.0274	UP	Yes	No	2	FGFR1OP2_exon_chr12:27113447_x000D_ FGFR1OP2_exon_chr12:27117528	0.189_x000D_ 0.811	0.7364_x000D_ 0.2636	0.5474_x000D_ -0.5474	Up_x000D_ NA	4_x000D_ 1	0.4981_x000D_ 1.0	0.521_x000D_ 1.0	0.0229_x000D_ 1.0	NA_x000D_ NA	FGFR1OP2_exon_chr12:27113447	FGFR1OP2_exon_chr12:27117528
OPTN	52.292	89.7309	0.7866	0.1114	NC	No	Yes	3	OPTN_exon_chr10:13152273_x000D_ OPTN_exon_chr10:13164384_x000D_ OPTN_exon_chr10:13178744	0.2052_x000D_ 0.4111_x000D_ 0.2367	0.2442_x000D_ 0.2993_x000D_ 0.395	0.039_x000D_ -0.1118_x000D_ 0.1583	NA_x000D_ NA_x000D_ Up	2_x000D_ 1_x000D_ 1	0.3307_x000D_ 1.0_x000D_ 1.0	0.0135_x000D_ 1.0_x000D_ 1.0	-0.3172_x000D_ 1.0_x000D_ 1.0	Shortening_x000D_ NA_x000D_ NA	OPTN_exon_chr10:13152273	OPTN_exon_chr10:13164384	OPTN_exon_chr10:13178744
NCK1-DT	2.8383	4.6755	0.7864	1	NC	No	No	1	NCK1-DT_exon_chr3:136561411	1	1	0	NA	2	NA	NA	NA	NA	NCK1-DT_exon_chr3:136561411
ISG20	7.8597	13.1917	0.7852	0.5018	NC	No	No	1	ISG20_exon_chr15:89198645	1	1	0	NA	1	1	1	1	NA	ISG20_exon_chr15:89198645
ZNF526	18.7694	33.2461	0.7849	0.3503	NC	No	No	1	ZNF526_exon_chr19:42728538	1	1	0	NA	1	1	1	1	NA	ZNF526_exon_chr19:42728538
ZBTB8A	17.1646	29.3537	0.7841	0.2754	NC	No	Yes	1	ZBTB8A_exon_chr1:33065687	1	1	0	NA	3	0.4526	0.1599	-0.2927	Both	ZBTB8A_exon_chr1:33065687
MDM1	4.6099	8.1347	0.7838	0.5706	NC	No	No	2	MDM1_exon_chr12:68689146_x000D_ MDM1_exon_chr12:68709045	0.25_x000D_ 0.75	0.637_x000D_ 0.363	0.3871_x000D_ -0.3871	NA_x000D_ NA	2_x000D_ 1	NA_x000D_ 1.0	NA_x000D_ 1.0	NA_x000D_ 1.0	NA_x000D_ NA	MDM1_exon_chr12:68689146	MDM1_exon_chr12:68709045
RC3H1	43.1218	73.1507	0.7833	0.0301	UP	No	Yes	1	RC3H1_exon_chr1:173908012	1	1	0	NA	4	0.9758	0.1283	-0.8475	Shortening	RC3H1_exon_chr1:173908012
GFER	106.067	182.569	0.7832	0.0089	UP	No	No	1	GFER_exon_chr16:2035866	1	1	0	NA	1	1	1	1	NA	GFER_exon_chr16:2035866
SNAR-A1	506.487	872.328	0.7828	0.2213	NC	No	No	2	SNAR-A1_exon_chr19:48421685_x000D_ SNAR-A1_exon_chr19:48437437	0.4945_x000D_ 0.5055	0.4986_x000D_ 0.5014	0.0041_x000D_ -0.0041	NA_x000D_ NA	1_x000D_ 1	1.0_x000D_ 1.0	1.0_x000D_ 1.0	1.0_x000D_ 1.0	NA_x000D_ NA	SNAR-A1_exon_chr19:48421685	SNAR-A1_exon_chr19:48437437
MCRIP1	104.502	179.285	0.7819	0.0035	UP	No	No	1	MCRIP1_exon_chr17:79781187	1	1	0	NA	1	1	1	1	NA	MCRIP1_exon_chr17:79781187
NIPAL2	13.8778	23.9964	0.7818	0.366	NC	No	Yes	1	NIPAL2_exon_chr8:99205318	1	1	0	NA	2	1	0.4724	-0.5276	Shortening	NIPAL2_exon_chr8:99205318
CUTA	73.6343	126.945	0.7818	0.0273	UP	No	No	1	CUTA_exon_chr6:33384553	1	1	0	NA	1	1	1	1	NA	CUTA_exon_chr6:33384553
EIF3CL	716.198	1233.12	0.7816	0.0004	UP	No	No	2	EIF3CL_exon_chr16:28391201_x000D_ EIF3CL_exon_chr16:28746751	0.5059_x000D_ 0.4941	0.5062_x000D_ 0.4938	0.0003_x000D_ -0.0003	NA_x000D_ NA	1_x000D_ 1	1.0_x000D_ 1.0	1.0_x000D_ 1.0	1.0_x000D_ 1.0	NA_x000D_ NA	EIF3CL_exon_chr16:28391201	EIF3CL_exon_chr16:28746751
SREBF1	126.389	218.042	0.7812	0.0013	UP	No	No	1	SREBF1_exon_chr17:17716165	1	1	0	NA	2	0.0799	0.1328	0.0529	NA	SREBF1_exon_chr17:17716165
ADAMTS2	8.2121	14.0415	0.7809	0.5516	NC	No	No	2	ADAMTS2_exon_chr5:178541325_x000D_ ADAMTS2_exon_chr5:178578201	0.6281_x000D_ 0.3719	0.5589_x000D_ 0.4411	-0.0692_x000D_ 0.0692	NA_x000D_ NA	1_x000D_ 1	1.0_x000D_ 1.0	1.0_x000D_ 1.0	1.0_x000D_ 1.0	NA_x000D_ NA	ADAMTS2_exon_chr5:178541325	ADAMTS2_exon_chr5:178578201
DMAC2L	4.9754	9.2037	0.78	0.6632	NC	No	Yes	1	DMAC2L_exon_chr14:50792326	1	1	0	NA	3	NA	NA	NA	Shortening	DMAC2L_exon_chr14:50792326
MIRLET7A1	0.2548	0.6011	0.7798	1	NC	No	No	1	MIRLET7A1_exon_chr9:96938238	1	1	0	NA	2	NA	NA	NA	NA	MIRLET7A1_exon_chr9:96938238
CCDC189	12.6276	21.5023	0.7797	0.3977	NC	No	No	1	CCDC189_exon_chr16:30768975	1	1	0	NA	1	1	1	1	NA	CCDC189_exon_chr16:30768975
SHISA8	9.4019	16.5322	0.7795	0.4504	NC	No	No	1	SHISA8_exon_chr22:42306151	1	1	0	NA	1	1	1	1	NA	SHISA8_exon_chr22:42306151
MBOAT1	34.0032	58.8029	0.7793	0.0808	UP	No	No	1	MBOAT1_exon_chr6:20102643	1	1	0	NA	1	1	1	1	NA	MBOAT1_exon_chr6:20102643
ZNF584	8.5145	14.2924	0.7786	0.6979	NC	No	No	1	ZNF584_exon_chr19:58928177	1	1	0	NA	1	1	1	1	NA	ZNF584_exon_chr19:58928177
FAHD2CP	4.1125	7.1581	0.7783	0.7955	NC	No	No	1	FAHD2CP_exon_chr2:96688421	1	1	0	NA	1	1	1	1	NA	FAHD2CP_exon_chr2:96688421
MIA2	61.2362	104.842	0.7783	0.0337	UP	No	Yes	3	MIA2_exon_chr14:39773494_x000D_ MIA2_exon_chr14:39777652_x000D_ MIA2_exon_chr14:39819301	0.1239_x000D_ 0.3181_x000D_ 0.5114	0.1355_x000D_ 0.3428_x000D_ 0.5217	0.0116_x000D_ 0.0247_x000D_ 0.0103	NA_x000D_ NA_x000D_ NA	1_x000D_ 1_x000D_ 3	1.0_x000D_ 1.0_x000D_ 0.7394	1.0_x000D_ 1.0_x000D_ 0.1646	1.0_x000D_ 1.0_x000D_ -0.5748	NA_x000D_ NA_x000D_ Shortening	MIA2_exon_chr14:39773494	MIA2_exon_chr14:39777652	MIA2_exon_chr14:39819301
MRPS14	96.5363	166.317	0.7779	0.0058	UP	No	No	1	MRPS14_exon_chr1:174983987	1	1	0	NA	5	0.8612	0.7916	-0.0696	NA	MRPS14_exon_chr1:174983987
ELMOD1	2.9366	5.3575	0.7778	0.9218	NC	No	No	1	ELMOD1_exon_chr11:107535750	1	1	0	NA	2	NA	NA	NA	NA	ELMOD1_exon_chr11:107535750
TPP1	15.6714	26.5973	0.7775	0.3371	NC	No	Yes	1	TPP1_exon_chr11:6635917	1	1	0	NA	3	NA	NA	NA	Both	TPP1_exon_chr11:6635917
TFDP2	132.362	226.424	0.7773	0.0139	UP	Yes	Yes	2	TFDP2_exon_chr3:141671538_x000D_ TFDP2_exon_chr3:141697524	0.6883_x000D_ 0.3117	0.8527_x000D_ 0.1473	0.1644_x000D_ -0.1644	Up_x000D_ NA	5_x000D_ 1	0.2446_x000D_ 1.0	0.0324_x000D_ 1.0	-0.2122_x000D_ 1.0	Shortening_x000D_ NA	TFDP2_exon_chr3:141671538	TFDP2_exon_chr3:141697524
HMOX1	146.936	252.621	0.7771	0.0395	UP	No	No	1	HMOX1_exon_chr22:35789460	1	1	0	NA	1	1	1	1	NA	HMOX1_exon_chr22:35789460
CEP70	53.3825	90.6737	0.7765	0.108	NC	Yes	No	4	CEP70_exon_chr3:138213918_x000D_ CEP70_exon_chr3:138219066_x000D_ CEP70_exon_chr3:138256189_x000D_ CEP70_exon_chr3:138289340	0.5416_x000D_ 0.0782_x000D_ 0.1841_x000D_ 0.1673	0.2538_x000D_ 0.3638_x000D_ 0.1799_x000D_ 0.1965	-0.2877_x000D_ 0.2856_x000D_ -0.0042_x000D_ 0.0292	NA_x000D_ Up_x000D_ NA_x000D_ NA	3_x000D_ 2_x000D_ 1_x000D_ 2	NA_x000D_ NA_x000D_ 1.0_x000D_ 0.9097	NA_x000D_ NA_x000D_ 1.0_x000D_ 0.6758	NA_x000D_ NA_x000D_ 1.0_x000D_ -0.2339	NA_x000D_ NA_x000D_ NA_x000D_ NA	CEP70_exon_chr3:138213918	CEP70_exon_chr3:138219066	CEP70_exon_chr3:138256189	CEP70_exon_chr3:138289340
NOTCH2NLA	254.965	436.709	0.7764	0.0032	UP	No	No	1	NOTCH2NLA_exon_chr1:145281954	1	1	0	NA	1	1	1	1	NA	NOTCH2NLA_exon_chr1:145281954
OXSM	20.5862	35.434	0.7762	0.1872	NC	No	No	1	OXSM_exon_chr3:25835582	1	1	0	NA	1	1	1	1	NA	OXSM_exon_chr3:25835582
RAB11FIP3	7.3631	12.6426	0.7757	0.7096	NC	No	No	1	RAB11FIP3_exon_chr16:570725	1	1	0	NA	3	NA	NA	NA	NA	RAB11FIP3_exon_chr16:570725
TMEM265	20.468	35.322	0.7747	0.6726	NC	No	No	1	TMEM265_exon_chr16:30755102	1	1	0	NA	1	1	1	1	NA	TMEM265_exon_chr16:30755102
PLPP3	4.0632	6.8284	0.7744	0.756	NC	No	No	1	PLPP3_exon_chr1:56962348	1	1	0	NA	1	1	1	1	NA	PLPP3_exon_chr1:56962348
STAU2	41.2632	69.4321	0.7743	0.1082	NC	Yes	Yes	2	STAU2_exon_chr8:74333700_x000D_ STAU2_exon_chr8:74464554	0.5327_x000D_ 0.4673	0.2749_x000D_ 0.7251	-0.2578_x000D_ 0.2578	NA_x000D_ Up	4_x000D_ 6	NA_x000D_ 0.7717	NA_x000D_ 0.0501	NA_x000D_ NA	Shortening_x000D_ Both	STAU2_exon_chr8:74333700	STAU2_exon_chr8:74464554
TM9SF2	99.4457	169.417	0.7741	0.0155	UP	No	Yes	1	TM9SF2_exon_chr13:100214944	1	1	0	NA	4	0.8212	0.2607	-0.5605	Shortening	TM9SF2_exon_chr13:100214944
HPS1	35.1187	60.071	0.7739	0.1026	NC	No	Yes	2	HPS1_exon_chr10:100177483_x000D_ HPS1_exon_chr10:100189399	0.4556_x000D_ 0.5444	0.2927_x000D_ 0.7073	-0.1629_x000D_ 0.1629	NA_x000D_ NA	2_x000D_ 5	NA_x000D_ NA	NA_x000D_ NA	NA_x000D_ NA	NA_x000D_ Shortening	HPS1_exon_chr10:100177483	HPS1_exon_chr10:100189399
RAB5B	101.365	171.933	0.7732	0.0374	UP	No	No	1	RAB5B_exon_chr12:56385880	1	1	0	NA	3	0.9643	0.9101	-0.0543	NA	RAB5B_exon_chr12:56385880
BLOC1S6	77.0544	132.439	0.7732	0.0257	UP	No	Yes	2	BLOC1S6_exon_chr15:45897625_x000D_ BLOC1S6_exon_chr15:45898592	0.1361_x000D_ 0.8639	0.1591_x000D_ 0.8409	0.0229_x000D_ -0.0229	NA_x000D_ NA	8_x000D_ 2	0.9196_x000D_ NA	0.2906_x000D_ NA	-0.629_x000D_ NA	Both_x000D_ NA	BLOC1S6_exon_chr15:45897625	BLOC1S6_exon_chr15:45898592
ITM2B	350.373	596.328	0.773	0.0003	UP	No	Yes	1	ITM2B_exon_chr13:48835274	1	1	0	NA	4	0.3426	0.0829	-0.2596	Shortening	ITM2B_exon_chr13:48835274
C2orf68	39.1773	66.3577	0.7729	0.1638	NC	No	Yes	1	C2orf68_exon_chr2:85836190	1	1	0	NA	4	0.2915	0.1675	-0.1239	Shortening	C2orf68_exon_chr2:85836190
HYAL1	4.4519	7.7478	0.7726	0.7707	NC	No	No	1	HYAL1_exon_chr3:50338231	1	1	0	NA	1	1	1	1	NA	HYAL1_exon_chr3:50338231
DNAJC22	38.683	65.5308	0.772	0.0461	UP	No	No	1	DNAJC22_exon_chr12:49745099	1	1	0	NA	5	0.2047	0.1343	-0.0704	NA	DNAJC22_exon_chr12:49745099
HYOU1	120.627	206.143	0.7711	0.0005	UP	No	No	2	HYOU1_exon_chr11:118916366_x000D_ HYOU1_exon_chr11:118919915	0.9064_x000D_ 0.0936	0.8854_x000D_ 0.1146	-0.021_x000D_ 0.021	NA_x000D_ NA	1_x000D_ 1	1.0_x000D_ 1.0	1.0_x000D_ 1.0	1.0_x000D_ 1.0	NA_x000D_ NA	HYOU1_exon_chr11:118916366	HYOU1_exon_chr11:118919915
DNAJC3	181.719	310.83	0.7711	0.0004	UP	No	Yes	2	DNAJC3_exon_chr13:96438192_x000D_ DNAJC3_exon_chr13:96443126	0.784_x000D_ 0.216	0.7174_x000D_ 0.2826	-0.0666_x000D_ 0.0666	NA_x000D_ NA	1_x000D_ 7	1.0_x000D_ 0.9064	1.0_x000D_ 0.1805	1.0_x000D_ -0.7259	NA_x000D_ Both	DNAJC3_exon_chr13:96438192	DNAJC3_exon_chr13:96443126
MRPS10	195.222	334.566	0.7705	0.0012	UP	No	Yes	1	MRPS10_exon_chr6:42176110	1	1	0	NA	8	0.3502	0.2348	-0.1154	Both	MRPS10_exon_chr6:42176110
ABI2	120.139	204.659	0.7704	0.0049	UP	No	Yes	1	ABI2_exon_chr2:204291899	1	1	0	NA	6	0.6785	0.1682	-0.5103	Shortening	ABI2_exon_chr2:204291899
AFDN	22.9608	38.4862	0.7702	0.21	NC	Yes	Yes	2	AFDN_exon_chr6:168276014_x000D_ AFDN_exon_chr6:168370461	0.5326_x000D_ 0.4674	0.2196_x000D_ 0.7804	-0.313_x000D_ 0.313	NA_x000D_ Up	1_x000D_ 6	1.0_x000D_ NA	1.0_x000D_ NA	1.0_x000D_ NA	NA_x000D_ Both	AFDN_exon_chr6:168276014	AFDN_exon_chr6:168370461
FERMT3	3.1914	5.7072	0.7698	1	NC	No	No	1	FERMT3_exon_chr11:63990784	1	1	0	NA	1	1	1	1	NA	FERMT3_exon_chr11:63990784
FXR1	399.617	679.94	0.7698	0.0027	UP	No	Yes	2	FXR1_exon_chr3:180666134_x000D_ FXR1_exon_chr3:180693909	0.169_x000D_ 0.831	0.1535_x000D_ 0.8465	-0.0155_x000D_ 0.0155	NA_x000D_ NA	1_x000D_ 7	1.0_x000D_ 0.3722	1.0_x000D_ 0.3105	1.0_x000D_ -0.0618	NA_x000D_ Both	FXR1_exon_chr3:180666134	FXR1_exon_chr3:180693909
ARHGAP17	43.9619	75.1217	0.7695	0.0479	UP	No	Yes	1	ARHGAP17_exon_chr16:24931581	1	1	0	NA	2	0.9949	0.8411	-0.1538	Shortening	ARHGAP17_exon_chr16:24931581
ITCH	56.896	98.1591	0.7694	0.0218	UP	No	Yes	1	ITCH_exon_chr20:33095499	1	1	0	NA	5	0.9427	0.2352	-0.7074	Both	ITCH_exon_chr20:33095499
CCNT2-AS1	5.7632	10.1027	0.7691	0.7554	NC	No	No	1	CCNT2-AS1_exon_chr2:135625309	1	1	0	NA	1	1	1	1	NA	CCNT2-AS1_exon_chr2:135625309
ZNF496	26.785	45.6281	0.769	0.14	NC	No	No	1	ZNF496_exon_chr1:247464578	1	1	0	NA	3	0.5182	0.4159	-0.1023	NA	ZNF496_exon_chr1:247464578
FANCI	535.339	911.714	0.769	0.0002	UP	No	No	1	FANCI_exon_chr15:89859627	1	1	0	NA	3	0.1144	0.0379	-0.0764	NA	FANCI_exon_chr15:89859627
UBE2CP5	9.6066	16.3187	0.7688	0.5316	NC	No	No	1	UBE2CP5_exon_chr19:58379127	1	1	0	NA	1	1	1	1	NA	UBE2CP5_exon_chr19:58379127
CASZ1	4.0391	6.8257	0.7687	0.8434	NC	No	No	2	CASZ1_exon_chr1:10700116_x000D_ CASZ1_exon_chr1:10708196	0.5555_x000D_ 0.4445	0.3469_x000D_ 0.6531	-0.2086_x000D_ 0.2086	NA_x000D_ NA	1_x000D_ 1	1.0_x000D_ 1.0	1.0_x000D_ 1.0	1.0_x000D_ 1.0	NA_x000D_ NA	CASZ1_exon_chr1:10700116	CASZ1_exon_chr1:10708196
CCDC117	77.7123	133.57	0.7685	0.0065	UP	No	Yes	3	CCDC117_exon_chr22:29176935_x000D_ CCDC117_exon_chr22:29179495_x000D_ CCDC117_exon_chr22:29182076	0.0408_x000D_ 0.0066_x000D_ 0.9527	0.0863_x000D_ 0.1184_x000D_ 0.7954	0.0455_x000D_ 0.1118_x000D_ -0.1573	NA_x000D_ Up_x000D_ NA	1_x000D_ 6_x000D_ 1	1.0_x000D_ 0.9792_x000D_ 1.0	1.0_x000D_ 0.5238_x000D_ 1.0	1.0_x000D_ -0.4554_x000D_ 1.0	NA_x000D_ Both_x000D_ NA	CCDC117_exon_chr22:29176935	CCDC117_exon_chr22:29179495	CCDC117_exon_chr22:29182076
COMMD10	37.6339	64.5002	0.7675	0.3905	NC	No	Yes	1	COMMD10_exon_chr5:115628147	1	1	0	NA	5	NA	NA	NA	Shortening	COMMD10_exon_chr5:115628147
ZFYVE19	33.359	56.6426	0.7675	0.2022	NC	No	No	1	ZFYVE19_exon_chr15:41106345	1	1	0	NA	1	1	1	1	NA	ZFYVE19_exon_chr15:41106345
GPRC5C	25.3649	43.0055	0.7672	0.175	NC	No	No	2	GPRC5C_exon_chr17:72442987_x000D_ GPRC5C_exon_chr17:72445473	0.8188_x000D_ 0.1812	0.8692_x000D_ 0.1308	0.0504_x000D_ -0.0504	NA_x000D_ NA	1_x000D_ 1	1.0_x000D_ 1.0	1.0_x000D_ 1.0	1.0_x000D_ 1.0	NA_x000D_ NA	GPRC5C_exon_chr17:72442987	GPRC5C_exon_chr17:72445473
POLR3B	12.8372	22.8234	0.7668	0.4864	NC	No	No	1	POLR3B_exon_chr12:106903197	1	1	0	NA	3	NA	NA	NA	NA	POLR3B_exon_chr12:106903197
TRAF5	11.1349	18.5752	0.7666	0.4385	NC	No	Yes	1	TRAF5_exon_chr1:211545469	1	1	0	NA	6	NA	NA	NA	Both	TRAF5_exon_chr1:211545469
BLOC1S3	15.6478	26.1491	0.7665	0.339	NC	No	No	1	BLOC1S3_exon_chr19:45682545	1	1	0	NA	1	1	1	1	NA	BLOC1S3_exon_chr19:45682545
ST3GAL2	27.669	47.0283	0.7665	0.1065	NC	No	Yes	1	ST3GAL2_exon_chr16:70415765	1	1	0	NA	3	0.8913	0.7867	-0.1047	Both	ST3GAL2_exon_chr16:70415765
SGMS2	21.8104	37.1739	0.7658	0.175	NC	No	Yes	1	SGMS2_exon_chr4:108831505	1	1	0	NA	3	0.8603	0.1752	-0.6851	Shortening	SGMS2_exon_chr4:108831505
LNP1	1.2495	2.2021	0.7651	1	NC	No	No	1	LNP1_exon_chr3:100174620	1	1	0	NA	1	1	1	1	NA	LNP1_exon_chr3:100174620
CCDC163	2.6811	4.6123	0.7642	1	NC	No	No	1	CCDC163_exon_chr1:45960838	1	1	0	NA	1	1	1	1	NA	CCDC163_exon_chr1:45960838
ALAD	32.3249	53.8242	0.7642	0.1201	NC	No	Yes	1	ALAD_exon_chr9:116150641	1	1	0	NA	3	0.8565	0.4065	-0.45	Both	ALAD_exon_chr9:116150641
TMEM117	11.6829	19.9128	0.7614	0.539	NC	No	No	1	TMEM117_exon_chr12:44781808	1	1	0	NA	1	1	1	1	NA	TMEM117_exon_chr12:44781808
BAAT	1.2742	2.2221	0.7607	1	NC	No	No	1	BAAT_exon_chr9:104125297	1	1	0	NA	1	1	1	1	NA	BAAT_exon_chr9:104125297
MTERF4	54.9151	93.1593	0.7606	0.0462	UP	Yes	Yes	3	MTERF4_exon_chr2:242015097_x000D_ MTERF4_exon_chr2:242028780_x000D_ MTERF4_exon_chr2:242035853	0.7421_x000D_ 0.1214_x000D_ 0.1365	0.55_x000D_ 0.3076_x000D_ 0.1424	-0.192_x000D_ 0.1861_x000D_ 0.0059	NA_x000D_ Up_x000D_ NA	4_x000D_ 2_x000D_ 1	NA_x000D_ NA_x000D_ 1.0	NA_x000D_ NA_x000D_ 1.0	NA_x000D_ NA_x000D_ 1.0	Shortening_x000D_ NA_x000D_ NA	MTERF4_exon_chr2:242015097	MTERF4_exon_chr2:242028780	MTERF4_exon_chr2:242035853
PRKCE	6.9873	12.071	0.7601	0.6736	NC	No	Yes	1	PRKCE_exon_chr2:46411873	1	1	0	NA	3	NA	NA	NA	Both	PRKCE_exon_chr2:46411873
LOC101929340	7.205	11.8481	0.7589	0.6208	NC	No	No	1	LOC101929340_exon_chr11:124634624	1	1	0	NA	1	1	1	1	NA	LOC101929340_exon_chr11:124634624
CLP1	16.4022	28.3396	0.7589	0.2654	NC	No	No	1	CLP1_exon_chr11:57428236	1	1	0	NA	1	1	1	1	NA	CLP1_exon_chr11:57428236
HYI	20.538	35.0479	0.7584	0.414	NC	No	No	1	HYI_exon_chr1:43916982	1	1	0	NA	1	1	1	1	NA	HYI_exon_chr1:43916982
CDCA2	56.5268	95.0587	0.7574	0.058	UP	No	No	2	CDCA2_exon_chr8:25360888_x000D_ CDCA2_exon_chr8:25364025	0.1557_x000D_ 0.8443	0.1891_x000D_ 0.8109	0.0333_x000D_ -0.0333	NA_x000D_ NA	1_x000D_ 2	1.0_x000D_ 0.8528	1.0_x000D_ 0.8325	1.0_x000D_ -0.0203	NA_x000D_ NA	CDCA2_exon_chr8:25360888	CDCA2_exon_chr8:25364025
ENTPD7	62.7037	106.432	0.7573	0.0889	UP	No	Yes	1	ENTPD7_exon_chr10:101464208	1	1	0	NA	4	0.1772	0.0927	-0.0845	Shortening	ENTPD7_exon_chr10:101464208
SRRM2-AS1	1.1526	2.017	0.7563	1	NC	No	No	1	SRRM2-AS1_exon_chr16:2787289	1	1	0	NA	1	1	1	1	NA	SRRM2-AS1_exon_chr16:2787289
TNFAIP2	36.6224	61.8195	0.756	0.1004	NC	No	No	1	TNFAIP2_exon_chr14:103601555	1	1	0	NA	1	1	1	1	NA	TNFAIP2_exon_chr14:103601555
AKAP3	2.2689	4.0544	0.7549	1	NC	No	No	1	AKAP3_exon_chr12:4725060	1	1	0	NA	1	1	1	1	NA	AKAP3_exon_chr12:4725060
OLMALINC	23.3977	39.0209	0.7548	0.2347	NC	No	No	1	OLMALINC_exon_chr10:102147793	1	1	0	NA	1	1	1	1	NA	OLMALINC_exon_chr10:102147793
CPEB4	17.1022	28.4328	0.7546	0.2736	NC	No	Yes	1	CPEB4_exon_chr5:173382912	1	1	0	NA	3	NA	NA	NA	Both	CPEB4_exon_chr5:173382912
ITPR2	19.0069	31.7419	0.7544	0.2854	NC	No	No	4	ITPR2_exon_chr12:26492416_x000D_ ITPR2_exon_chr12:26774229_x000D_ ITPR2_exon_chr12:26848583_x000D_ ITPR2_exon_chr12:26877675	0.4252_x000D_ 0.1288_x000D_ 0.1436_x000D_ 0.2075	0.3878_x000D_ 0.3111_x000D_ 0.1821_x000D_ 0.054	-0.0374_x000D_ 0.1823_x000D_ 0.0385_x000D_ -0.1535	NA_x000D_ NA_x000D_ NA_x000D_ NA	1_x000D_ 1_x000D_ 2_x000D_ 1	1.0_x000D_ 1.0_x000D_ NA_x000D_ 1.0	1.0_x000D_ 1.0_x000D_ NA_x000D_ 1.0	1.0_x000D_ 1.0_x000D_ NA_x000D_ 1.0	NA_x000D_ NA_x000D_ NA_x000D_ NA	ITPR2_exon_chr12:26492416	ITPR2_exon_chr12:26774229	ITPR2_exon_chr12:26848583	ITPR2_exon_chr12:26877675
FYTTD1	175.592	296.073	0.7538	0.0141	UP	No	Yes	2	FYTTD1_exon_chr3:197497002_x000D_ FYTTD1_exon_chr3:197508681	0.0675_x000D_ 0.8883	0.0724_x000D_ 0.9072	0.0049_x000D_ 0.0189	NA_x000D_ NA	7_x000D_ 1	0.8569_x000D_ 1.0	0.2983_x000D_ 1.0	-0.5587_x000D_ 1.0	Shortening_x000D_ NA	FYTTD1_exon_chr3:197497002	FYTTD1_exon_chr3:197508681
AAR2	29.9625	50.3333	0.7536	0.1588	NC	No	No	1	AAR2_exon_chr20:34843499	1	1	0	NA	1	1	1	1	NA	AAR2_exon_chr20:34843499
H2BC5	17.6468	29.2193	0.7533	0.4759	NC	No	No	2	H2BC5_exon_chr6:26158348_x000D_ H2BC5_exon_chr6:26171202	0.022_x000D_ 0.978	0.0298_x000D_ 0.9702	0.0078_x000D_ -0.0078	NA_x000D_ NA	1_x000D_ 1	1.0_x000D_ 1.0	1.0_x000D_ 1.0	1.0_x000D_ 1.0	NA_x000D_ NA	H2BC5_exon_chr6:26158348	H2BC5_exon_chr6:26171202
ZFYVE16	24.8314	41.7881	0.7515	0.1256	NC	No	Yes	2	ZFYVE16_exon_chr5:79770481_x000D_ ZFYVE16_exon_chr5:79773037	0.0103_x000D_ 0.9897	0.219_x000D_ 0.781	0.2087_x000D_ -0.2087	Up_x000D_ NA	4_x000D_ 1	0.733_x000D_ 1.0	0.371_x000D_ 1.0	-0.362_x000D_ 1.0	Shortening_x000D_ NA	ZFYVE16_exon_chr5:79770481	ZFYVE16_exon_chr5:79773037
SCARNA26B	4.0507	6.5252	0.7513	0.7282	NC	No	No	1	SCARNA26B_exon_chr1:155753623	1	1	0	NA	1	1	1	1	NA	SCARNA26B_exon_chr1:155753623
PSMA7	669.023	1125.61	0.7509	0.0002	UP	No	Yes	1	PSMA7_exon_chr20:60712005	1	1	0	NA	2	0.8709	0.7096	-0.1613	Shortening	PSMA7_exon_chr20:60712005
GTDC1	14.0351	23.7366	0.7499	0.3728	NC	No	Yes	2	GTDC1_exon_chr2:144704702_x000D_ GTDC1_exon_chr2:144765102	0.854_x000D_ 0.146	0.8441_x000D_ 0.1559	-0.0099_x000D_ 0.0099	NA_x000D_ NA	2_x000D_ 1	1.0_x000D_ 1.0	0.5608_x000D_ 1.0	NA_x000D_ 1.0	Shortening_x000D_ NA	GTDC1_exon_chr2:144704702	GTDC1_exon_chr2:144765102
SNORA105A	219.081	368.918	0.7499	0.0005	UP	No	No	1	SNORA105A_exon_chr5:21884562	1	1	0	NA	1	1	1	1	NA	SNORA105A_exon_chr5:21884562
DNMT3A	24.1636	40.4828	0.7498	0.1274	NC	No	No	1	DNMT3A_exon_chr2:25457289	1	1	0	NA	5	0.6734	0.6718	-0.0015	NA	DNMT3A_exon_chr2:25457289
MPRIP	96.071	163.224	0.7495	0.0201	UP	Yes	No	3	MPRIP_exon_chr17:17067422_x000D_ MPRIP_exon_chr17:17075031_x000D_ MPRIP_exon_chr17:17088136	0.1074_x000D_ 0.1766_x000D_ 0.716	0.0447_x000D_ 0.0798_x000D_ 0.8755	-0.0627_x000D_ -0.0968_x000D_ 0.1595	NA_x000D_ NA_x000D_ Up	1_x000D_ 7_x000D_ 1	1.0_x000D_ 0.4473_x000D_ 1.0	1.0_x000D_ 0.2512_x000D_ 1.0	1.0_x000D_ -0.1961_x000D_ 1.0	NA_x000D_ NA_x000D_ NA	MPRIP_exon_chr17:17067422	MPRIP_exon_chr17:17075031	MPRIP_exon_chr17:17088136
KANTR	16.5327	27.3401	0.7484	0.3273	NC	No	No	1	KANTR_exon_chrX:53171029	1	1	0	NA	2	0.8562	0.8527	-0.0035	NA	KANTR_exon_chrX:53171029
MEIS3	31.2487	52.9002	0.7475	0.1503	NC	No	No	1	MEIS3_exon_chr19:47906810	1	1	0	NA	1	1	1	1	NA	MEIS3_exon_chr19:47906810
NRBP2	82.2278	137.143	0.7475	0.0368	UP	No	Yes	1	NRBP2_exon_chr8:144917900	1	1	0	NA	3	0.2958	0.125	-0.1708	Shortening	NRBP2_exon_chr8:144917900
MST1R	89.4196	150.305	0.7468	0.0563	UP	No	No	1	MST1R_exon_chr3:49924995	1	1	0	NA	1	1	1	1	NA	MST1R_exon_chr3:49924995
ASNSD1	30.9601	52.6533	0.7458	0.1487	NC	No	No	1	ASNSD1_exon_chr2:190535166	1	1	0	NA	1	1	1	1	NA	ASNSD1_exon_chr2:190535166
SEC22A	38.3187	63.7164	0.7458	0.1306	NC	No	No	1	SEC22A_exon_chr3:122990368	1	1	0	NA	1	1	1	1	NA	SEC22A_exon_chr3:122990368
ZC3H7A	14.9693	25.1581	0.7457	0.2644	NC	No	No	1	ZC3H7A_exon_chr16:11845362	1	1	0	NA	2	1	0.9492	-0.0508	NA	ZC3H7A_exon_chr16:11845362
DYNC1LI1	219.107	368.11	0.745	0.0002	UP	No	No	2	DYNC1LI1_exon_chr3:32568400_x000D_ DYNC1LI1_exon_chr3:32587457	0.682_x000D_ 0.2738	0.73_x000D_ 0.2221	0.048_x000D_ -0.0517	NA_x000D_ NA	4_x000D_ 1	0.1358_x000D_ 1.0	0.0536_x000D_ 1.0	-0.0822_x000D_ 1.0	NA_x000D_ NA	DYNC1LI1_exon_chr3:32568400	DYNC1LI1_exon_chr3:32587457
HOXA4	7.6062	12.848	0.7449	0.5891	NC	No	Yes	1	HOXA4_exon_chr7:27169190	1	1	0	NA	2	NA	NA	NA	Shortening	HOXA4_exon_chr7:27169190
TRERF1	21.4099	35.7172	0.7445	0.1701	NC	No	Yes	1	TRERF1_exon_chr6:42196407	1	1	0	NA	3	0.4555	0.0591	-0.3965	Shortening	TRERF1_exon_chr6:42196407
POC1B	36.7783	61.0659	0.7445	0.074	UP	No	Yes	1	POC1B_exon_chr12:89815034	1	1	0	NA	2	1	0.4484	-0.5516	Shortening	POC1B_exon_chr12:89815034
BTN3A3	2.1226	3.4678	0.7438	1	NC	No	No	1	BTN3A3_exon_chr6:26451902	1	1	0	NA	1	1	1	1	NA	BTN3A3_exon_chr6:26451902
RBFOX2	550.305	920.289	0.7437	0.0001	UP	No	Yes	2	RBFOX2_exon_chr22:36140296_x000D_ RBFOX2_exon_chr22:36236511	0.7117_x000D_ 0.2883	0.7881_x000D_ 0.2119	0.0763_x000D_ -0.0763	NA_x000D_ NA	1_x000D_ 7	1.0_x000D_ 0.626	1.0_x000D_ 0.1126	1.0_x000D_ -0.5134	NA_x000D_ Shortening	RBFOX2_exon_chr22:36140296	RBFOX2_exon_chr22:36236511
WDR53	15.9995	26.4322	0.7433	0.4497	NC	No	No	2	WDR53_exon_chr3:196281678_x000D_ WDR53_exon_chr3:196288362	0.9521_x000D_ 0.0479	0.976_x000D_ 0.024	0.0238_x000D_ -0.0238	NA_x000D_ NA	1_x000D_ 1	1.0_x000D_ 1.0	1.0_x000D_ 1.0	1.0_x000D_ 1.0	NA_x000D_ NA	WDR53_exon_chr3:196281678	WDR53_exon_chr3:196288362
GLMP	28.5288	46.9326	0.7433	0.1584	NC	No	No	1	GLMP_exon_chr1:156263000	1	1	0	NA	1	1	1	1	NA	GLMP_exon_chr1:156263000
INO80C	26.4333	44.67	0.7427	0.1632	NC	No	No	1	INO80C_exon_chr18:33048706	1	1	0	NA	1	1	1	1	NA	INO80C_exon_chr18:33048706
EEA1	355.033	594.789	0.7426	0.016	UP	No	Yes	5	EEA1_exon_chr12:93173076_x000D_ EEA1_exon_chr12:93174187_x000D_ EEA1_exon_chr12:93196510_x000D_ EEA1_exon_chr12:93213287_x000D_ EEA1_exon_chr12:93251116	0.0612_x000D_ 0.1949_x000D_ 0.3468_x000D_ 0.1221_x000D_ 0.1267	0.1107_x000D_ 0.1684_x000D_ 0.2982_x000D_ 0.0903_x000D_ 0.1251	0.0495_x000D_ -0.0264_x000D_ -0.0486_x000D_ -0.0317_x000D_ -0.0015	NA_x000D_ NA_x000D_ NA_x000D_ NA_x000D_ NA	1_x000D_ 2_x000D_ 1_x000D_ 1_x000D_ 1	1.0_x000D_ 0.7827_x000D_ 1.0_x000D_ 1.0_x000D_ 1.0	1.0_x000D_ 0.6779_x000D_ 1.0_x000D_ 1.0_x000D_ 1.0	1.0_x000D_ -0.1048_x000D_ 1.0_x000D_ 1.0_x000D_ 1.0	NA_x000D_ Shortening_x000D_ NA_x000D_ NA_x000D_ NA	EEA1_exon_chr12:93173076	EEA1_exon_chr12:93174187	EEA1_exon_chr12:93196510	EEA1_exon_chr12:93213287	EEA1_exon_chr12:93251116
RPL23AP87	20.927	35.9515	0.7419	0.1638	NC	No	No	1	RPL23AP87_exon_chr17:81187692	1	1	0	NA	1	1	1	1	NA	RPL23AP87_exon_chr17:81187692
CHDH	12.0697	19.9825	0.7416	0.3883	NC	No	No	1	CHDH_exon_chr3:53852222	1	1	0	NA	4	NA	NA	NA	NA	CHDH_exon_chr3:53852222
MAPKAPK2	81.5588	137.437	0.7415	0.0236	UP	No	Yes	1	MAPKAPK2_exon_chr1:206905382	1	1	0	NA	2	0.9053	0.4929	-0.4123	Shortening	MAPKAPK2_exon_chr1:206905382
ZNF3	27.9024	47.0915	0.7411	0.2037	NC	No	No	1	ZNF3_exon_chr7:99669835	1	1	0	NA	1	1	1	1	NA	ZNF3_exon_chr7:99669835
CKAP4	44.5293	73.7494	0.7409	0.0571	UP	No	Yes	1	CKAP4_exon_chr12:106634127	1	1	0	NA	2	1	0.6086	-0.3914	Shortening	CKAP4_exon_chr12:106634127
SYNGR1	42.3712	70.7908	0.7403	0.089	UP	Yes	No	2	SYNGR1_exon_chr22:39773602_x000D_ SYNGR1_exon_chr22:39777700	0.6259_x000D_ 0.3741	0.8879_x000D_ 0.1121	0.262_x000D_ -0.262	Up_x000D_ NA	1_x000D_ 1	1.0_x000D_ 1.0	1.0_x000D_ 1.0	1.0_x000D_ 1.0	NA_x000D_ NA	SYNGR1_exon_chr22:39773602	SYNGR1_exon_chr22:39777700
LARP1B	57.8276	96.8344	0.7397	0.0247	UP	No	Yes	3	LARP1B_exon_chr4:129028293_x000D_ LARP1B_exon_chr4:129131010_x000D_ LARP1B_exon_chr4:129143503	0.5871_x000D_ 0.3365_x000D_ 0.0349	0.769_x000D_ 0.0697_x000D_ 0.0619	0.1818_x000D_ -0.2668_x000D_ 0.0271	Up_x000D_ NA_x000D_ NA	1_x000D_ 2_x000D_ 2	1.0_x000D_ NA_x000D_ 0.6861	1.0_x000D_ NA_x000D_ 0.3739	1.0_x000D_ NA_x000D_ -0.3122	NA_x000D_ Shortening_x000D_ Shortening	LARP1B_exon_chr4:129028293	LARP1B_exon_chr4:129131010	LARP1B_exon_chr4:129143503
GGCX	62.9224	105.639	0.7382	0.0476	UP	Yes	No	2	GGCX_exon_chr2:85777249_x000D_ GGCX_exon_chr2:85786198	0.6279_x000D_ 0.3721	0.7709_x000D_ 0.2291	0.143_x000D_ -0.143	Up_x000D_ NA	8_x000D_ 2	0.4064_x000D_ 0.8494	0.325_x000D_ 0.7938	-0.0814_x000D_ -0.0556	NA_x000D_ NA	GGCX_exon_chr2:85777249	GGCX_exon_chr2:85786198
DIS3L2	17.15	27.6725	0.7381	0.368	NC	No	No	2	DIS3L2_exon_chr2:232995328_x000D_ DIS3L2_exon_chr2:233200482	0.2753_x000D_ 0.7247	0.5792_x000D_ 0.4208	0.3039_x000D_ -0.3039	NA_x000D_ NA	2_x000D_ 1	NA_x000D_ 1.0	NA_x000D_ 1.0	NA_x000D_ 1.0	NA_x000D_ NA	DIS3L2_exon_chr2:232995328	DIS3L2_exon_chr2:233200482
PLA2G15	8.2376	14.1626	0.738	0.6101	NC	No	No	1	PLA2G15_exon_chr16:68293048	1	1	0	NA	1	1	1	1	NA	PLA2G15_exon_chr16:68293048
ZNF845	4.7555	8.0484	0.7376	0.7931	NC	No	No	1	ZNF845_exon_chr19:53854070	1	1	0	NA	1	1	1	1	NA	ZNF845_exon_chr19:53854070
RCAN3	44.106	73.3254	0.7372	0.0734	UP	No	Yes	2	RCAN3_exon_chr1:24840803_x000D_ RCAN3_exon_chr1:24861582	0.0597_x000D_ 0.9403	0.0855_x000D_ 0.9145	0.0258_x000D_ -0.0258	NA_x000D_ NA	1_x000D_ 6	1.0_x000D_ 0.7011	1.0_x000D_ 0.1866	1.0_x000D_ -0.5146	NA_x000D_ Both	RCAN3_exon_chr1:24840803	RCAN3_exon_chr1:24861582
HDAC10	8.4559	14.4835	0.7371	0.5007	NC	No	No	1	HDAC10_exon_chr22:50683959	1	1	0	NA	1	1	1	1	NA	HDAC10_exon_chr22:50683959
ZNF519	4.9362	8.0279	0.7369	0.8321	NC	No	Yes	1	ZNF519_exon_chr18:14106408	1	1	0	NA	4	NA	NA	NA	Both	ZNF519_exon_chr18:14106408
MVP	175.565	292.945	0.7368	0.0015	UP	No	No	2	MVP_exon_chr16:29830875_x000D_ MVP_exon_chr16:29859082	0.6815_x000D_ 0.3185	0.5902_x000D_ 0.4098	-0.0914_x000D_ 0.0914	NA_x000D_ NA	4_x000D_ 1	0.1391_x000D_ 1.0	0.0495_x000D_ 1.0	-0.0896_x000D_ 1.0	NA_x000D_ NA	MVP_exon_chr16:29830875	MVP_exon_chr16:29859082
TRAPPC11	16.8378	28.5829	0.7365	0.3032	NC	No	Yes	1	TRAPPC11_exon_chr4:184633752	1	1	0	NA	2	0.9269	0.3634	-0.5636	Shortening	TRAPPC11_exon_chr4:184633752
RBM26-AS1	7.993	12.9143	0.7364	0.5659	NC	No	No	1	RBM26-AS1_exon_chr13:79996861	1	1	0	NA	1	1	1	1	NA	RBM26-AS1_exon_chr13:79996861
C11orf52	4.7787	7.6869	0.7363	0.8075	NC	No	No	1	C11orf52_exon_chr11:111796683	1	1	0	NA	2	NA	NA	NA	NA	C11orf52_exon_chr11:111796683
PGRMC1	168.464	280.215	0.7362	0.0008	UP	No	Yes	1	PGRMC1_exon_chrX:118377113	1	1	0	NA	4	0.9329	0.2146	-0.7183	Both	PGRMC1_exon_chrX:118377113
DBT	27.887	46.4154	0.7349	0.2048	NC	No	Yes	1	DBT_exon_chr1:100661978	1	1	0	NA	8	0.3707	0.154	-0.2166	Both	DBT_exon_chr1:100661978
SNAR-A12	275.183	458.761	0.7342	0.1869	NC	No	No	2	SNAR-A12_exon_chr19:48410934_x000D_ SNAR-A12_exon_chr19:48448178	0.4663_x000D_ 0.5337	0.4934_x000D_ 0.5066	0.0271_x000D_ -0.0271	NA_x000D_ NA	1_x000D_ 1	1.0_x000D_ 1.0	1.0_x000D_ 1.0	1.0_x000D_ 1.0	NA_x000D_ NA	SNAR-A12_exon_chr19:48410934	SNAR-A12_exon_chr19:48448178
KIRREL1-IT1	4.3792	7.4586	0.734	0.8183	NC	No	No	1	KIRREL1-IT1_exon_chr1:157995339	1	1	0	NA	1	1	1	1	NA	KIRREL1-IT1_exon_chr1:157995339
PARGP1-AGAP4	8.4794	14.3135	0.7338	0.815	NC	No	No	1	PARGP1-AGAP4_exon_chr10:51226465	1	1	0	NA	1	1	1	1	NA	PARGP1-AGAP4_exon_chr10:51226465
AGAP9	2.9118	5.0543	0.7334	1	NC	No	No	1	AGAP9_exon_chr10:48235611	1	1	0	NA	1	1	1	1	NA	AGAP9_exon_chr10:48235611
LOC283335	11.5725	19.3125	0.7333	0.4867	NC	No	No	1	LOC283335_exon_chr12:53439437	1	1	0	NA	1	1	1	1	NA	LOC283335_exon_chr12:53439437
LRRC8A	58.0436	96.4123	0.7331	0.0943	UP	No	No	1	LRRC8A_exon_chr9:131678374	1	1	0	NA	1	1	1	1	NA	LRRC8A_exon_chr9:131678374
LOC100129484	1.4075	2.4853	0.7329	1	NC	No	No	1	LOC100129484_exon_chr7:5468558	1	1	0	NA	1	1	1	1	NA	LOC100129484_exon_chr7:5468558
LOXL4	0.8978	1.5518	0.7326	1	NC	No	No	1	LOXL4_exon_chr10:100008748	1	1	0	NA	2	NA	NA	NA	NA	LOXL4_exon_chr10:100008748
IL11RA	11.8624	19.318	0.7325	0.4137	NC	No	No	1	IL11RA_exon_chr9:34661478	1	1	0	NA	1	1	1	1	NA	IL11RA_exon_chr9:34661478
GXYLT2	3.3596	5.3289	0.7323	0.7974	NC	No	No	1	GXYLT2_exon_chr3:73024127	1	1	0	NA	2	NA	NA	NA	NA	GXYLT2_exon_chr3:73024127
SLC9A7	34.1006	57.1477	0.732	0.1006	NC	No	Yes	1	SLC9A7_exon_chrX:46466638	1	1	0	NA	7	0.7017	0.3696	-0.3321	Shortening	SLC9A7_exon_chrX:46466638
PBX4	14.6779	24.135	0.7316	0.3541	NC	No	No	1	PBX4_exon_chr19:19672926	1	1	0	NA	1	1	1	1	NA	PBX4_exon_chr19:19672926
SNAR-A3	2441.71	4054.37	0.7313	0.2669	NC	No	No	10	SNAR-A3_exon_chr19:48427035_x000D_ SNAR-A3_exon_chr19:50595866_x000D_ SNAR-A3_exon_chr19:50601203_x000D_ SNAR-A3_exon_chr19:50604268_x000D_ SNAR-A3_exon_chr19:50607332_x000D_ SNAR-A3_exon_chr19:50610391_x000D_ SNAR-A3_exon_chr19:50615745_x000D_ SNAR-A3_exon_chr19:50621097_x000D_ SNAR-A3_exon_chr19:50626451_x000D_ SNAR-A3_exon_chr19:50631779	0.0923_x000D_ 0.0981_x000D_ 0.1008_x000D_ 0.0976_x000D_ 0.1024_x000D_ 0.1005_x000D_ 0.1021_x000D_ 0.1026_x000D_ 0.1006_x000D_ 0.103	0.0993_x000D_ 0.0981_x000D_ 0.1026_x000D_ 0.0978_x000D_ 0.1008_x000D_ 0.0959_x000D_ 0.1009_x000D_ 0.1023_x000D_ 0.0984_x000D_ 0.1038	0.0069_x000D_ 0.0_x000D_ 0.0019_x000D_ 0.0002_x000D_ -0.0016_x000D_ -0.0046_x000D_ -0.0012_x000D_ -0.0003_x000D_ -0.0022_x000D_ 0.0008	NA_x000D_ NA_x000D_ NA_x000D_ NA_x000D_ NA_x000D_ NA_x000D_ NA_x000D_ NA_x000D_ NA_x000D_ NA	1_x000D_ 1_x000D_ 1_x000D_ 1_x000D_ 1_x000D_ 1_x000D_ 1_x000D_ 1_x000D_ 1_x000D_ 1	1.0_x000D_ 1.0_x000D_ 1.0_x000D_ 1.0_x000D_ 1.0_x000D_ 1.0_x000D_ 1.0_x000D_ 1.0_x000D_ 1.0_x000D_ 1.0	1.0_x000D_ 1.0_x000D_ 1.0_x000D_ 1.0_x000D_ 1.0_x000D_ 1.0_x000D_ 1.0_x000D_ 1.0_x000D_ 1.0_x000D_ 1.0	1.0_x000D_ 1.0_x000D_ 1.0_x000D_ 1.0_x000D_ 1.0_x000D_ 1.0_x000D_ 1.0_x000D_ 1.0_x000D_ 1.0_x000D_ 1.0	NA_x000D_ NA_x000D_ NA_x000D_ NA_x000D_ NA_x000D_ NA_x000D_ NA_x000D_ NA_x000D_ NA_x000D_ NA	SNAR-A3_exon_chr19:48427035	SNAR-A3_exon_chr19:50595866	SNAR-A3_exon_chr19:50601203	SNAR-A3_exon_chr19:50604268	SNAR-A3_exon_chr19:50607332	SNAR-A3_exon_chr19:50610391	SNAR-A3_exon_chr19:50615745	SNAR-A3_exon_chr19:50621097	SNAR-A3_exon_chr19:50626451
TMEM167A	290.38	482.523	0.7313	0.0002	UP	No	Yes	1	TMEM167A_exon_chr5:82352973	1	1	0	NA	13	0.2812	0.1161	-0.1651	Both	TMEM167A_exon_chr5:82352973
PDGFC	11.0636	18.7921	0.7312	0.3973	NC	No	No	1	PDGFC_exon_chr4:157684358	1	1	0	NA	4	NA	NA	NA	NA	PDGFC_exon_chr4:157684358
CUL5	75.9075	127.034	0.731	0.0798	UP	No	Yes	1	CUL5_exon_chr11:107974916	1	1	0	NA	5	0.7043	0.2398	-0.4645	Both	CUL5_exon_chr11:107974916
RFX3	6.1259	10.1053	0.7307	0.706	NC	No	No	1	RFX3_exon_chr9:3225280	1	1	0	NA	3	NA	NA	NA	NA	RFX3_exon_chr9:3225280
MAPRE2	59.0166	98.9319	0.7304	0.0267	UP	No	Yes	1	MAPRE2_exon_chr18:32720258	1	1	0	NA	3	0.3562	0.073	-0.2832	Shortening	MAPRE2_exon_chr18:32720258
DNAJC4	14.0836	23.2512	0.7302	0.3772	NC	No	No	1	DNAJC4_exon_chr11:64001365	1	1	0	NA	1	1	1	1	NA	DNAJC4_exon_chr11:64001365
AP5B1	34.901	58.4621	0.7302	0.0777	UP	No	No	1	AP5B1_exon_chr11:65547813	1	1	0	NA	1	1	1	1	NA	AP5B1_exon_chr11:65547813
CNTNAP3	7.363	11.9895	0.73	0.5971	NC	No	No	1	CNTNAP3_exon_chr9:39074008	1	1	0	NA	1	1	1	1	NA	CNTNAP3_exon_chr9:39074008
GNPTG	33.4804	55.6071	0.7298	0.139	NC	No	No	1	GNPTG_exon_chr16:1412997	1	1	0	NA	4	0.0662	0.1371	0.0709	NA	GNPTG_exon_chr16:1412997
PALLD	275.06	456.745	0.7294	0.0018	UP	No	Yes	1	PALLD_exon_chr4:169847363	1	1	0	NA	6	0.8195	0.36	-0.4595	Both	PALLD_exon_chr4:169847363
BSG	23.9825	40.026	0.7288	0.175	NC	No	Yes	1	BSG_exon_chr19:582749	1	1	0	NA	5	0.2122	0.1287	-0.0835	Both	BSG_exon_chr19:582749
PCAT7	0.2548	0.5693	0.7285	1	NC	No	No	1	PCAT7_exon_chr9:97329671	1	1	0	NA	1	1	1	1	NA	PCAT7_exon_chr9:97329671
ZNF875	6.8293	11.1889	0.7285	0.6986	NC	No	No	2	ZNF875_exon_chr19:37820073_x000D_ ZNF875_exon_chr19:37853007	0.1121_x000D_ 0.8879	0.0729_x000D_ 0.9271	-0.0392_x000D_ 0.0392	NA_x000D_ NA	1_x000D_ 1	1.0_x000D_ 1.0	1.0_x000D_ 1.0	1.0_x000D_ 1.0	NA_x000D_ NA	ZNF875_exon_chr19:37820073	ZNF875_exon_chr19:37853007
BCL2L13	62.0612	103.569	0.7285	0.0344	UP	No	Yes	3	BCL2L13_exon_chr22:18165979_x000D_ BCL2L13_exon_chr22:18185008_x000D_ BCL2L13_exon_chr22:18209442	0.0205_x000D_ 0.066_x000D_ 0.9134	0.0692_x000D_ 0.1167_x000D_ 0.8141	0.0486_x000D_ 0.0507_x000D_ -0.0993	NA_x000D_ NA_x000D_ NA	3_x000D_ 1_x000D_ 1	0.1981_x000D_ 1.0_x000D_ 1.0	0.2667_x000D_ 1.0_x000D_ 1.0	0.0685_x000D_ 1.0_x000D_ 1.0	Lengthening_x000D_ NA_x000D_ NA	BCL2L13_exon_chr22:18165979	BCL2L13_exon_chr22:18185008	BCL2L13_exon_chr22:18209442
TMSB15A	27.2342	45.5078	0.7275	0.1678	NC	No	No	1	TMSB15A_exon_chrX:101769052	1	1	0	NA	1	1	1	1	NA	TMSB15A_exon_chrX:101769052
ZNF14	9.535	15.7779	0.7274	0.557	NC	No	No	1	ZNF14_exon_chr19:19823898	1	1	0	NA	3	NA	NA	NA	NA	ZNF14_exon_chr19:19823898
PEX7	16.0875	27.291	0.727	0.3473	NC	No	Yes	1	PEX7_exon_chr6:137234595	1	1	0	NA	2	NA	NA	NA	Shortening	PEX7_exon_chr6:137234595
CDCA4	224.678	371.998	0.7269	0.2377	NC	No	Yes	1	CDCA4_exon_chr14:105478272	1	1	0	NA	5	0.6639	0.2939	-0.37	Both	CDCA4_exon_chr14:105478272
FAM167A	5.6898	9.6289	0.7268	0.9024	NC	No	No	1	FAM167A_exon_chr8:11282145	1	1	0	NA	1	1	1	1	NA	FAM167A_exon_chr8:11282145
NMB	14.8957	24.2331	0.7266	0.3581	NC	No	No	1	NMB_exon_chr15:85198640	1	1	0	NA	1	1	1	1	NA	NMB_exon_chr15:85198640
TRAPPC2	23.8479	39.6598	0.726	0.2912	NC	No	Yes	2	TRAPPC2_exon_chrX:13732624_x000D_ TRAPPC2_exon_chrX:13734206	0.8535_x000D_ 0.1465	0.9712_x000D_ 0.0288	0.1177_x000D_ -0.1177	NA_x000D_ NA	3_x000D_ 1	0.8894_x000D_ 1.0	0.3669_x000D_ 1.0	-0.5226_x000D_ 1.0	Shortening_x000D_ NA	TRAPPC2_exon_chrX:13732624	TRAPPC2_exon_chrX:13734206
ERFL	1.0194	1.8524	0.7249	1	NC	No	No	1	ERFL_exon_chr19:42412828	1	1	0	NA	1	1	1	1	NA	ERFL_exon_chr19:42412828
EED	31.8497	53.2524	0.7246	0.5229	NC	No	Yes	1	EED_exon_chr11:85989374	1	1	0	NA	2	NA	NA	NA	Shortening	EED_exon_chr11:85989374
NAA40	5.3256	8.8309	0.7244	0.6098	NC	No	No	1	NAA40_exon_chr11:63721809	1	1	0	NA	4	NA	NA	NA	NA	NAA40_exon_chr11:63721809
TTC21B	10.625	17.0495	0.7241	0.6026	NC	No	Yes	1	TTC21B_exon_chr2:166731342	1	1	0	NA	4	NA	NA	NA	Shortening	TTC21B_exon_chr2:166731342
LRRC49	11.2324	18.3441	0.724	0.4687	NC	No	Yes	1	LRRC49_exon_chr15:71341747	1	1	0	NA	2	NA	NA	NA	Shortening	LRRC49_exon_chr15:71341747
IFT122	25.828	43.3732	0.7231	0.2566	NC	No	No	1	IFT122_exon_chr3:129239018	1	1	0	NA	1	1	1	1	NA	IFT122_exon_chr3:129239018
ZNF45	9.7287	15.9165	0.723	0.5865	NC	No	No	1	ZNF45_exon_chr19:44419352	1	1	0	NA	1	1	1	1	NA	ZNF45_exon_chr19:44419352
KIF1B	180.013	298.375	0.7226	0.008	UP	No	Yes	4	KIF1B_exon_chr1:10332298_x000D_ KIF1B_exon_chr1:10356954_x000D_ KIF1B_exon_chr1:10357231_x000D_ KIF1B_exon_chr1:10436602	0.046_x000D_ 0.0613_x000D_ 0.6302_x000D_ 0.2273	0.0725_x000D_ 0.0895_x000D_ 0.6264_x000D_ 0.1865	0.0265_x000D_ 0.0282_x000D_ -0.0038_x000D_ -0.0408	NA_x000D_ NA_x000D_ NA_x000D_ NA	1_x000D_ 1_x000D_ 3_x000D_ 1	1.0_x000D_ 1.0_x000D_ 0.9909_x000D_ 1.0	1.0_x000D_ 1.0_x000D_ 0.582_x000D_ 1.0	1.0_x000D_ 1.0_x000D_ -0.4089_x000D_ 1.0	NA_x000D_ NA_x000D_ Both_x000D_ NA	KIF1B_exon_chr1:10332298	KIF1B_exon_chr1:10356954	KIF1B_exon_chr1:10357231	KIF1B_exon_chr1:10436602
PLPP5	37.324	61.0524	0.7222	0.1348	NC	No	No	2	PLPP5_exon_chr8:38122467_x000D_ PLPP5_exon_chr8:38124909	0.4185_x000D_ 0.5815	0.4044_x000D_ 0.5956	-0.0141_x000D_ 0.0141	NA_x000D_ NA	1_x000D_ 2	1.0_x000D_ NA	1.0_x000D_ NA	1.0_x000D_ NA	NA_x000D_ NA	PLPP5_exon_chr8:38122467	PLPP5_exon_chr8:38124909
TCHP	63.5767	104.968	0.7221	0.0797	UP	No	No	4	TCHP_exon_chr12:110342541_x000D_ TCHP_exon_chr12:110345330_x000D_ TCHP_exon_chr12:110352246_x000D_ TCHP_exon_chr12:110354395	0.1292_x000D_ 0.4029_x000D_ 0.2961_x000D_ 0.1718	0.1951_x000D_ 0.3719_x000D_ 0.3157_x000D_ 0.1173	0.0659_x000D_ -0.031_x000D_ 0.0195_x000D_ -0.0545	NA_x000D_ NA_x000D_ NA_x000D_ NA	1_x000D_ 1_x000D_ 2_x000D_ 3	1.0_x000D_ 1.0_x000D_ 0.3536_x000D_ NA	1.0_x000D_ 1.0_x000D_ 0.5275_x000D_ NA	1.0_x000D_ 1.0_x000D_ 0.1738_x000D_ NA	NA_x000D_ NA_x000D_ NA_x000D_ NA	TCHP_exon_chr12:110342541	TCHP_exon_chr12:110345330	TCHP_exon_chr12:110352246	TCHP_exon_chr12:110354395
F11R	154.046	254.332	0.7219	0.0024	UP	No	Yes	1	F11R_exon_chr1:160968696	1	1	0	NA	8	0.7116	0.6069	-0.1047	Both	F11R_exon_chr1:160968696
TRIM52	6.1375	9.828	0.7214	0.6263	NC	No	No	1	TRIM52_exon_chr5:180684495	1	1	0	NA	1	1	1	1	NA	TRIM52_exon_chr5:180684495
LYN	98.9379	163.453	0.7214	0.0126	UP	No	Yes	1	LYN_exon_chr8:56922466	1	1	0	NA	5	0.7203	0.1874	-0.5329	Both	LYN_exon_chr8:56922466
SIX5	15.8189	26.3262	0.7208	0.4127	NC	No	No	1	SIX5_exon_chr19:46269369	1	1	0	NA	1	1	1	1	NA	SIX5_exon_chr19:46269369
LSP1P5	26.8255	45.2446	0.7199	0.2675	NC	No	No	1	LSP1P5_exon_chr1:148951244	1	1	0	NA	1	1	1	1	NA	LSP1P5_exon_chr1:148951244
AMY2B	10.6754	17.7691	0.7197	0.4121	NC	No	No	1	AMY2B_exon_chr1:104097265	1	1	0	NA	1	1	1	1	NA	AMY2B_exon_chr1:104097265
[truncated: 11,234 more rows]

## Sheet: 116dDI-NT_vs_116dDI-CFIm25
Gene Name	Mean Counts Cond1	Mean Counts Cond2	Fold Change	pAdj	DE Result	Any Splicing APA?	Any Tandem APA?	#Exons with a PAC	Exon Names	Exon fraction Cond1	Exon fraction Cond2	Exon Fraction Change	Exon Results_x000D_ (NA = Not significant)	#PACs per Exon	PDU per Exon Cond1	PDU per Exon Cond2	delta-PDUI per Exon	DPAC Result	Links to USCS Gene Browser (one link per cell):
MDH2	581.083	343.656	-0.7611	0	DOWN	No	No	1	MDH2_exon_chr7:75695596	1	1	0	NA	3	0.1385	0.0553	-0.0833	NA	MDH2_exon_chr7:75695596
RPL22L1	2676.47	1573.23	-0.7671	0	DOWN	No	No	1	RPL22L1_exon_chr3:170584313	1	1	0	NA	2	0.9768	0.9575	-0.0194	NA	RPL22L1_exon_chr3:170584313
SNHG25	1302.35	728.574	-0.8399	0	DOWN	No	No	1	SNHG25_exon_chr17:62223437	1	1	0	NA	1	1	1	1	NA	SNHG25_exon_chr17:62223437
GOT2	208.924	113.214	-0.8857	0	DOWN	No	No	1	GOT2_exon_chr16:58742197	1	1	0	NA	1	1	1	1	NA	GOT2_exon_chr16:58742197
CHPF	912.842	490.605	-0.8953	0	DOWN	No	No	1	CHPF_exon_chr2:220405364	1	1	0	NA	1	1	1	1	NA	CHPF_exon_chr2:220405364
RPAIN	692.688	369.392	-0.9079	0	DOWN	No	No	1	RPAIN_exon_chr17:5335861	1	1	0	NA	3	0.6697	0.6151	-0.0546	NA	RPAIN_exon_chr17:5335861
ABRACL	328.497	162.555	-1.0139	0	DOWN	No	No	1	ABRACL_exon_chr6:139363855	1	1	0	NA	1	1	1	1	NA	ABRACL_exon_chr6:139363855
MRPL58	260.639	125.52	-1.0494	0	DOWN	No	No	2	MRPL58_exon_chr17:73016582_x000D_ MRPL58_exon_chr17:73017015	0.07_x000D_ 0.93	0.0504_x000D_ 0.9496	-0.0196_x000D_ 0.0196	NA_x000D_ NA	2_x000D_ 1	NA_x000D_ 1.0	NA_x000D_ 1.0	NA_x000D_ 1.0	NA_x000D_ NA	MRPL58_exon_chr17:73016582	MRPL58_exon_chr17:73017015
GNG10	288.046	134.718	-1.1014	0	DOWN	No	No	1	GNG10_exon_chr9:114431548	1	1	0	NA	3	0.4038	0.3867	-0.0172	NA	GNG10_exon_chr9:114431548
CTXN1	120.03	54.2586	-1.1438	0	DOWN	No	No	1	CTXN1_exon_chr19:7990443	1	1	0	NA	1	1	1	1	NA	CTXN1_exon_chr19:7990443
ZNF770	257.207	115.585	-1.1542	0	DOWN	No	No	1	ZNF770_exon_chr15:35275691	1	1	0	NA	7	0.8106	0.7603	-0.0502	NA	ZNF770_exon_chr15:35275691
MSX1	151.172	68.2245	-1.1572	0	DOWN	No	No	1	MSX1_exon_chr4:4864427	1	1	0	NA	1	1	1	1	NA	MSX1_exon_chr4:4864427
C11orf1	387.469	167.012	-1.2183	0	DOWN	No	No	1	C11orf1_exon_chr11:111754494	1	1	0	NA	1	1	1	1	NA	C11orf1_exon_chr11:111754494
RAC3	242.013	103.984	-1.2183	0	DOWN	No	No	1	RAC3_exon_chr17:79991574	1	1	0	NA	1	1	1	1	NA	RAC3_exon_chr17:79991574
FUBP1	756.043	321.452	-1.2352	0	DOWN	Yes	No	3	FUBP1_exon_chr1:78409954_x000D_ FUBP1_exon_chr1:78414459_x000D_ FUBP1_exon_chr1:78430041	0.0431_x000D_ 0.3247_x000D_ 0.6321	0.0687_x000D_ 0.2134_x000D_ 0.714	0.0255_x000D_ -0.1114_x000D_ 0.0819	NA_x000D_ Down_x000D_ NA	1_x000D_ 1_x000D_ 1	1.0_x000D_ 1.0_x000D_ 1.0	1.0_x000D_ 1.0_x000D_ 1.0	1.0_x000D_ 1.0_x000D_ 1.0	NA_x000D_ NA_x000D_ NA	FUBP1_exon_chr1:78409954	FUBP1_exon_chr1:78414459	FUBP1_exon_chr1:78430041
CRABP2	1167.66	494.415	-1.2414	0	DOWN	No	No	1	CRABP2_exon_chr1:156669868	1	1	0	NA	1	1	1	1	NA	CRABP2_exon_chr1:156669868
UCA1	388.397	162.794	-1.2595	0	DOWN	No	No	1	UCA1_exon_chr19:15945311	1	1	0	NA	9	0.1214	0.0935	-0.0279	NA	UCA1_exon_chr19:15945311
LSM8	136.844	56.5218	-1.2772	0	DOWN	No	No	1	LSM8_exon_chr7:117831965	1	1	0	NA	1	1	1	1	NA	LSM8_exon_chr7:117831965
RBPMS2	156.222	60.5288	-1.3714	0	DOWN	No	No	1	RBPMS2_exon_chr15:65033199	1	1	0	NA	1	1	1	1	NA	RBPMS2_exon_chr15:65033199
RAB25	228.08	78.0021	-1.5477	0	DOWN	No	No	1	RAB25_exon_chr1:156039950	1	1	0	NA	1	1	1	1	NA	RAB25_exon_chr1:156039950
HES1	80.4443	26.1412	-1.6297	0	DOWN	No	No	2	HES1_exon_chr3:193853936_x000D_ HES1_exon_chr3:193855471	0.0186_x000D_ 0.9814	0.0377_x000D_ 0.9623	0.019_x000D_ -0.019	NA_x000D_ NA	1_x000D_ 1	1.0_x000D_ 1.0	1.0_x000D_ 1.0	1.0_x000D_ 1.0	NA_x000D_ NA	HES1_exon_chr3:193853936	HES1_exon_chr3:193855471
YWHAB	776.779	241.841	-1.6891	0	DOWN	Yes	No	2	YWHAB_exon_chr20:43530171_x000D_ YWHAB_exon_chr20:43535022	0.1429_x000D_ 0.8571	0.3816_x000D_ 0.6184	0.2387_x000D_ -0.2387	NA_x000D_ Down	1_x000D_ 9	1.0_x000D_ 0.8253	1.0_x000D_ 0.8214	1.0_x000D_ -0.0039	NA_x000D_ NA	YWHAB_exon_chr20:43530171	YWHAB_exon_chr20:43535022
C5orf15	384.568	116.891	-1.7254	0	DOWN	No	No	1	C5orf15_exon_chr5:133292681	1	1	0	NA	1	1	1	1	NA	C5orf15_exon_chr5:133292681
CLDN12	60.9936	17.1897	-1.8358	0	DOWN	No	No	1	CLDN12_exon_chr7:90041957	1	1	0	NA	1	1	1	1	NA	CLDN12_exon_chr7:90041957
TAF9	182.896	49.2455	-1.9024	0	DOWN	No	No	1	TAF9_exon_chr5:68661581	1	1	0	NA	3	0.9693	0.9021	-0.0672	NA	TAF9_exon_chr5:68661581
LIMS3	82.4807	19.9811	-2.0706	0	DOWN	No	No	2	LIMS3_exon_chr2:110681924_x000D_ LIMS3_exon_chr2:111204737	0.4958_x000D_ 0.5042	0.4928_x000D_ 0.5072	-0.003_x000D_ 0.003	NA_x000D_ NA	1_x000D_ 1	1.0_x000D_ 1.0	1.0_x000D_ 1.0	1.0_x000D_ 1.0	NA_x000D_ NA	LIMS3_exon_chr2:110681924	LIMS3_exon_chr2:111204737
SRP9	959.782	205.811	-2.2226	0	DOWN	No	No	1	SRP9_exon_chr1:225976941	1	1	0	NA	1	1	1	1	NA	SRP9_exon_chr1:225976941
PFN2	352.039	74.9561	-2.2333	0	DOWN	No	No	1	PFN2_exon_chr3:149684373	1	1	0	NA	1	1	1	1	NA	PFN2_exon_chr3:149684373
LINC01963	49.0432	5.3749	-3.1663	0	DOWN	No	No	1	LINC01963_exon_chr2:217081611	1	1	0	NA	2	NA	NA	NA	NA	LINC01963_exon_chr2:217081611
UBE2K	766.612	464.621	-0.721	0	DOWN	No	Yes	1	UBE2K_exon_chr4:39779979	1	1	0	NA	8	0.8343	0.2276	-0.6067	Shortening	UBE2K_exon_chr4:39779979
SNHG16	965.975	564.738	-0.7754	0	DOWN	No	Yes	1	SNHG16_exon_chr17:74559200	1	1	0	NA	7	0.8604	0.65	-0.2104	Shortening	SNHG16_exon_chr17:74559200
CTNNB1	393.202	221.46	-0.8304	0	DOWN	No	Yes	1	CTNNB1_exon_chr3:41280624	1	1	0	NA	3	0.799	0.6337	-0.1652	Shortening	CTNNB1_exon_chr3:41280624
ETF1	1320.72	736.946	-0.8404	0	DOWN	No	Yes	1	ETF1_exon_chr5:137844076	1	1	0	NA	8	0.8334	0.3746	-0.4589	Both	ETF1_exon_chr5:137844076
PTBP3	714.131	376.925	-0.9206	0	DOWN	No	Yes	1	PTBP3_exon_chr9:114986263	1	1	0	NA	13	0.9628	0.7243	-0.2386	Shortening	PTBP3_exon_chr9:114986263
CPOX	778.96	407.939	-0.9359	0	DOWN	No	Yes	1	CPOX_exon_chr3:98299614	1	1	0	NA	5	0.97	0.7772	-0.1928	Shortening	CPOX_exon_chr3:98299614
YAP1	440.908	225.327	-0.9674	0	DOWN	No	Yes	1	YAP1_exon_chr11:102100432	1	1	0	NA	7	0.8989	0.5168	-0.3822	Both	YAP1_exon_chr11:102100432
STT3B	543.967	274.822	-0.9839	0	DOWN	No	Yes	1	STT3B_exon_chr3:31677475	1	1	0	NA	3	0.9317	0.5885	-0.3431	Shortening	STT3B_exon_chr3:31677475
UBE2H	387.524	193.803	-1.0006	0	DOWN	No	Yes	1	UBE2H_exon_chr7:129474901	1	1	0	NA	7	0.6064	0.3387	-0.2678	Both	UBE2H_exon_chr7:129474901
POLR3G	361.635	178.386	-1.0195	0	DOWN	No	Yes	3	POLR3G_exon_chr5:89797722_x000D_ POLR3G_exon_chr5:89802344_x000D_ POLR3G_exon_chr5:89807869	0.1222_x000D_ 0.7418_x000D_ 0.136	0.1522_x000D_ 0.778_x000D_ 0.0698	0.03_x000D_ 0.0361_x000D_ -0.0662	NA_x000D_ NA_x000D_ NA	4_x000D_ 1_x000D_ 1	NA_x000D_ 1.0_x000D_ 1.0	NA_x000D_ 1.0_x000D_ 1.0	NA_x000D_ 1.0_x000D_ 1.0	Shortening_x000D_ NA_x000D_ NA	POLR3G_exon_chr5:89797722	POLR3G_exon_chr5:89802344	POLR3G_exon_chr5:89807869
SMN1	2197.38	1066.51	-1.0429	0	DOWN	No	Yes	2	SMN1_exon_chr5:69372845_x000D_ SMN1_exon_chr5:70248265	0.5002_x000D_ 0.4924	0.4982_x000D_ 0.4928	-0.0021_x000D_ 0.0004	NA_x000D_ NA	2_x000D_ 2	0.9502_x000D_ 0.933	0.6814_x000D_ 0.6684	-0.2688_x000D_ -0.2645	Shortening_x000D_ Shortening	SMN1_exon_chr5:69372845	SMN1_exon_chr5:70248265
PTP4A1	753.309	353.144	-1.0935	0	DOWN	No	Yes	1	PTP4A1_exon_chr6:64289961	1	1	0	NA	12	0.3181	0.2359	-0.0822	Both	PTP4A1_exon_chr6:64289961
UBP1	231.869	105.456	-1.137	0	DOWN	No	Yes	2	UBP1_exon_chr3:33431860_x000D_ UBP1_exon_chr3:33450838	0.9344_x000D_ 0.0656	0.9477_x000D_ 0.0523	0.0133_x000D_ -0.0133	NA_x000D_ NA	3_x000D_ 1	0.8764_x000D_ 1.0	0.7754_x000D_ 1.0	-0.101_x000D_ 1.0	Shortening_x000D_ NA	UBP1_exon_chr3:33431860	UBP1_exon_chr3:33450838
TPD52	207.302	89.0582	-1.2225	0	DOWN	No	Yes	1	TPD52_exon_chr8:80950470	1	1	0	NA	9	0.9452	0.5622	-0.383	Both	TPD52_exon_chr8:80950470
GABARAPL2	192.544	82.6847	-1.2245	0	DOWN	No	Yes	1	GABARAPL2_exon_chr16:75611176	1	1	0	NA	4	0.8807	0.6566	-0.2241	Shortening	GABARAPL2_exon_chr16:75611176
EEF1E1	266.613	113.729	-1.2248	0	DOWN	No	Yes	1	EEF1E1_exon_chr6:8080263	1	1	0	NA	4	0.6321	0.4174	-0.2147	Both	EEF1E1_exon_chr6:8080263
UBFD1	226	94.1019	-1.2656	0	DOWN	No	Yes	1	UBFD1_exon_chr16:23581800	1	1	0	NA	2	0.9266	0.4175	-0.5091	Shortening	UBFD1_exon_chr16:23581800
SLC6A6	109.129	44.2027	-1.2946	0	DOWN	No	Yes	1	SLC6A6_exon_chr3:14526374	1	1	0	NA	2	0.9837	0.8392	-0.1445	Shortening	SLC6A6_exon_chr3:14526374
RPRD1A	231.592	93.551	-1.3177	0	DOWN	Yes	Yes	2	RPRD1A_exon_chr18:33573263_x000D_ RPRD1A_exon_chr18:33605641	0.9785_x000D_ 0.0215	0.8673_x000D_ 0.1327	-0.1112_x000D_ 0.1112	Down_x000D_ NA	1_x000D_ 5	1.0_x000D_ 0.8298	1.0_x000D_ 0.4772	1.0_x000D_ -0.3526	NA_x000D_ Shortening	RPRD1A_exon_chr18:33573263	RPRD1A_exon_chr18:33605641
ECT2	154.289	62.2647	-1.3189	0	DOWN	No	Yes	1	ECT2_exon_chr3:172537937	1	1	0	NA	2	0.8099	0.6566	-0.1533	Shortening	ECT2_exon_chr3:172537937
TLE3	139.719	55.2259	-1.3403	0	DOWN	No	Yes	1	TLE3_exon_chr15:70342543	1	1	0	NA	4	0.8424	0.5895	-0.2529	Shortening	TLE3_exon_chr15:70342543
MAGOHB	198.719	77.7522	-1.3541	0	DOWN	No	Yes	1	MAGOHB_exon_chr12:10758973	1	1	0	NA	4	0.9183	0.6032	-0.3152	Shortening	MAGOHB_exon_chr12:10758973
PRELID3B	325.442	123.84	-1.3897	0	DOWN	No	Yes	1	PRELID3B_exon_chr20:57610181	1	1	0	NA	7	0.8427	0.485	-0.3578	Shortening	PRELID3B_exon_chr20:57610181
NHLRC2	123.057	41.4733	-1.5663	0	DOWN	No	Yes	1	NHLRC2_exon_chr10:115668038	1	1	0	NA	10	0.8912	0.5957	-0.2955	Shortening	NHLRC2_exon_chr10:115668038
SLC2A1	332.466	104.961	-1.6691	0	DOWN	No	Yes	1	SLC2A1_exon_chr1:43392912	1	1	0	NA	6	0.7886	0.6539	-0.1347	Shortening	SLC2A1_exon_chr1:43392912
DHRS4-AS1	60.4384	18.8494	-1.6767	0	DOWN	No	Yes	1	DHRS4-AS1_exon_chr14:24410367	1	1	0	NA	2	0.9062	0.4805	-0.4257	Shortening	DHRS4-AS1_exon_chr14:24410367
ARHGEF19	143.502	43.8925	-1.7063	0	DOWN	No	Yes	1	ARHGEF19_exon_chr1:16525239	1	1	0	NA	2	0.5935	0.3648	-0.2288	Shortening	ARHGEF19_exon_chr1:16525239
HNRNPLL	74.6938	21.7337	-1.8058	0	DOWN	No	Yes	1	HNRNPLL_exon_chr2:38791379	1	1	0	NA	6	0.4799	0.343	-0.1369	Shortening	HNRNPLL_exon_chr2:38791379
NUDT21	719.641	154.132	-2.2199	0	DOWN	No	Yes	1	NUDT21_exon_chr16:56466645	1	1	0	NA	6	0.6969	0.6	-0.0968	Shortening	NUDT21_exon_chr16:56466645
SLC25A5	2135.17	1390.38	-0.6191	0.0001	DOWN	No	No	1	SLC25A5_exon_chrX:118604863	1	1	0	NA	1	1	1	1	NA	SLC25A5_exon_chrX:118604863
CYC1	925.613	566.737	-0.708	0.0001	DOWN	No	No	1	CYC1_exon_chr8:145152134	1	1	0	NA	1	1	1	1	NA	CYC1_exon_chr8:145152134
PYCR1	1025.38	596.384	-0.7816	0.0001	DOWN	No	No	1	PYCR1_exon_chr17:79891252	1	1	0	NA	1	1	1	1	NA	PYCR1_exon_chr17:79891252
CARM1	276.059	157.399	-0.8113	0.0001	DOWN	No	No	1	CARM1_exon_chr19:11032290	1	1	0	NA	2	0.8884	0.8546	-0.0338	NA	CARM1_exon_chr19:11032290
BZW2	216.451	119.019	-0.8617	0.0001	DOWN	No	No	1	BZW2_exon_chr7:16745684	1	1	0	NA	1	1	1	1	NA	BZW2_exon_chr7:16745684
PRDX3	1117.63	592.947	-0.9145	0.0001	DOWN	No	No	1	PRDX3_exon_chr10:120928045	1	1	0	NA	1	1	1	1	NA	PRDX3_exon_chr10:120928045
RABL6	788.821	405.973	-0.9578	0.0001	DOWN	No	No	2	RABL6_exon_chr9:139734605_x000D_ RABL6_exon_chr9:139734773	0.6459_x000D_ 0.3329	0.7167_x000D_ 0.2678	0.0709_x000D_ -0.0651	NA_x000D_ NA	1_x000D_ 3	1.0_x000D_ 0.5571	1.0_x000D_ 0.5647	1.0_x000D_ 0.0075	NA_x000D_ NA	RABL6_exon_chr9:139734605	RABL6_exon_chr9:139734773
TTLL12	227.631	115.001	-0.9836	0.0001	DOWN	No	No	1	TTLL12_exon_chr22:43564165	1	1	0	NA	3	0.9202	0.8943	-0.0259	NA	TTLL12_exon_chr22:43564165
YDJC	137.119	63.2974	-1.1126	0.0001	DOWN	No	No	1	YDJC_exon_chr22:21983076	1	1	0	NA	1	1	1	1	NA	YDJC_exon_chr22:21983076
SPR	141.072	64.1533	-1.1397	0.0001	DOWN	No	No	1	SPR_exon_chr2:73118475	1	1	0	NA	1	1	1	1	NA	SPR_exon_chr2:73118475
OXA1L	150.338	67.726	-1.1586	0.0001	DOWN	No	No	1	OXA1L_exon_chr14:23240642	1	1	0	NA	3	0.8031	0.8355	0.0324	NA	OXA1L_exon_chr14:23240642
LINC01405	90.3362	34.4108	-1.4005	0.0001	DOWN	No	No	1	LINC01405_exon_chr12:111374988	1	1	0	NA	1	1	1	1	NA	LINC01405_exon_chr12:111374988
UNC13A	112.568	41.1271	-1.4461	0.0001	DOWN	No	No	1	UNC13A_exon_chr19:17717163	1	1	0	NA	1	1	1	1	NA	UNC13A_exon_chr19:17717163
ST3GAL6	54.0396	12.7597	-2.0944	0.0001	DOWN	No	No	1	ST3GAL6_exon_chr3:98512518	1	1	0	NA	6	NA	NA	NA	NA	ST3GAL6_exon_chr3:98512518
TMED10	809.158	465.449	-0.7977	0.0001	DOWN	No	Yes	1	TMED10_exon_chr14:75601709	1	1	0	NA	3	0.8438	0.4035	-0.4404	Shortening	TMED10_exon_chr14:75601709
MAL2	507.325	289.775	-0.8094	0.0001	DOWN	No	Yes	1	MAL2_exon_chr8:120255656	1	1	0	NA	3	0.9188	0.4815	-0.4373	Both	MAL2_exon_chr8:120255656
FAM122B	177.305	86.4872	-1.0314	0.0001	DOWN	No	Yes	1	FAM122B_exon_chrX:133906313	1	1	0	NA	3	0.758	0.4944	-0.2635	Shortening	FAM122B_exon_chrX:133906313
PSMD11	307.397	143.634	-1.0949	0.0001	DOWN	No	Yes	1	PSMD11_exon_chr17:30807506	1	1	0	NA	4	0.2476	0.199	-0.0486	Both	PSMD11_exon_chr17:30807506
MTA2	89.8807	39.3312	-1.1967	0.0001	DOWN	No	Yes	1	MTA2_exon_chr11:62361512	1	1	0	NA	2	0.9239	0.7297	-0.1942	Shortening	MTA2_exon_chr11:62361512
SDC1	224.571	94.9834	-1.239	0.0001	DOWN	No	Yes	1	SDC1_exon_chr2:20402696	1	1	0	NA	3	0.6622	0.5666	-0.0956	Shortening	SDC1_exon_chr2:20402696
NR1D2	284.487	115.524	-1.3014	0.0001	DOWN	No	Yes	1	NR1D2_exon_chr3:24018713	1	1	0	NA	4	0.9866	0.6858	-0.3009	Shortening	NR1D2_exon_chr3:24018713
AEBP2	73.7846	24.8102	-1.5704	0.0001	DOWN	No	Yes	1	AEBP2_exon_chr12:19671020	1	1	0	NA	6	0.6332	0.4788	-0.1545	Both	AEBP2_exon_chr12:19671020
BID	191.172	101.618	-0.907	0.0002	DOWN	No	No	1	BID_exon_chr22:18218357	1	1	0	NA	3	0.2063	0.2208	0.0145	NA	BID_exon_chr22:18218357
DHRS4	310.535	150.839	-1.0472	0.0002	DOWN	No	No	1	DHRS4_exon_chr14:24437965	1	1	0	NA	1	1	1	1	NA	DHRS4_exon_chr14:24437965
FTSJ1	105.239	46.4106	-1.1766	0.0002	DOWN	No	No	1	FTSJ1_exon_chrX:48344123	1	1	0	NA	2	0.0603	0.0282	-0.0321	NA	FTSJ1_exon_chrX:48344123
TAF1	143.621	61.8203	-1.211	0.0002	DOWN	No	No	1	TAF1_exon_chrX:70683673	1	1	0	NA	3	0.8227	0.8331	0.0105	NA	TAF1_exon_chrX:70683673
EEF1AKMT4	47.6146	15.9788	-1.5706	0.0002	DOWN	No	No	1	EEF1AKMT4_exon_chr3:183976075	1	1	0	NA	1	1	1	1	NA	EEF1AKMT4_exon_chr3:183976075
LINC00294	39.1832	10.6127	-1.8903	0.0002	DOWN	No	No	1	LINC00294_exon_chr11:33097695	1	1	0	NA	1	1	1	1	NA	LINC00294_exon_chr11:33097695
MRM1	22.2959	1.5162	-3.8763	0.0002	DOWN	No	No	1	MRM1_exon_chr17:34964678	1	1	0	NA	1	1	1	1	NA	MRM1_exon_chr17:34964678
MBNL2	152.922	78.3036	-0.9739	0.0002	DOWN	No	Yes	1	MBNL2_exon_chr13:98043575	1	1	0	NA	4	0.9928	0.6418	-0.351	Shortening	MBNL2_exon_chr13:98043575
LAMTOR2	615.034	398.743	-0.6265	0.0003	DOWN	No	No	1	LAMTOR2_exon_chr1:156028105	1	1	0	NA	1	1	1	1	NA	LAMTOR2_exon_chr1:156028105
NDUFB10	711.649	441.281	-0.6915	0.0003	DOWN	No	No	1	NDUFB10_exon_chr16:2011797	1	1	0	NA	1	1	1	1	NA	NDUFB10_exon_chr16:2011797
CIRBP	458.576	263.769	-0.7971	0.0003	DOWN	No	No	1	CIRBP_exon_chr19:1271979	1	1	0	NA	3	0.1284	0.1348	0.0064	NA	CIRBP_exon_chr19:1271979
GCAT	199.906	112.031	-0.8398	0.0003	DOWN	No	No	1	GCAT_exon_chr22:38212573	1	1	0	NA	1	1	1	1	NA	GCAT_exon_chr22:38212573
DHRS4L2	315.99	162.253	-0.9666	0.0003	DOWN	No	No	1	DHRS4L2_exon_chr14:24475094	1	1	0	NA	1	1	1	1	NA	DHRS4L2_exon_chr14:24475094
SNHG9	180.811	79.7767	-1.1857	0.0003	DOWN	No	No	1	SNHG9_exon_chr16:2015184	1	1	0	NA	1	1	1	1	NA	SNHG9_exon_chr16:2015184
NUBPL	87.131	28.5238	-1.6199	0.0003	DOWN	No	No	1	NUBPL_exon_chr14:32328323	1	1	0	NA	1	1	1	1	NA	NUBPL_exon_chr14:32328323
SGPP1	48.5473	13.0618	-1.9061	0.0003	DOWN	No	No	1	SGPP1_exon_chr14:64153374	1	1	0	NA	1	1	1	1	NA	SGPP1_exon_chr14:64153374
TERT	29.133	5.5167	-2.399	0.0003	DOWN	No	No	1	TERT_exon_chr5:1253946	1	1	0	NA	1	1	1	1	NA	TERT_exon_chr5:1253946
ITGB8	21.0725	1.263	-4.0952	0.0003	DOWN	No	No	1	ITGB8_exon_chr7:20449497	1	1	0	NA	1	1	1	1	NA	ITGB8_exon_chr7:20449497
RAB10	341.896	188.1	-0.8622	0.0003	DOWN	No	Yes	1	RAB10_exon_chr2:26357806	1	1	0	NA	9	0.769	0.3767	-0.3923	Both	RAB10_exon_chr2:26357806
SETX	156.595	72.7965	-1.1149	0.0003	DOWN	Yes	Yes	3	SETX_exon_chr9:135140372_x000D_ SETX_exon_chr9:135171415_x000D_ SETX_exon_chr9:135205886	0.8458_x000D_ 0.0661_x000D_ 0.0881	0.6713_x000D_ 0.116_x000D_ 0.2127	-0.1745_x000D_ 0.0499_x000D_ 0.1246	Down_x000D_ NA_x000D_ NA	6_x000D_ 1_x000D_ 3	0.9516_x000D_ 1.0_x000D_ NA	0.5353_x000D_ 1.0_x000D_ NA	-0.4163_x000D_ 1.0_x000D_ NA	Shortening_x000D_ NA_x000D_ NA	SETX_exon_chr9:135140372	SETX_exon_chr9:135171415	SETX_exon_chr9:135205886
PMS2	80.1793	33.2848	-1.2763	0.0003	DOWN	No	Yes	2	PMS2_exon_chr7:6013173_x000D_ PMS2_exon_chr7:6027251	0.8342_x000D_ 0.1658	0.8633_x000D_ 0.1367	0.0292_x000D_ -0.0292	NA_x000D_ NA	3_x000D_ 2	0.8932_x000D_ NA	0.8184_x000D_ NA	-0.0748_x000D_ NA	Both_x000D_ Lengthening	PMS2_exon_chr7:6013173	PMS2_exon_chr7:6027251
PROSER2	38.9925	8.8456	-2.1171	0.0003	DOWN	No	Yes	1	PROSER2_exon_chr10:11911488	1	1	0	NA	2	NA	NA	NA	Shortening	PROSER2_exon_chr10:11911488
S100A4	1267.89	782.889	-0.6963	0.0004	DOWN	No	No	1	S100A4_exon_chr1:153516399	1	1	0	NA	1	1	1	1	NA	S100A4_exon_chr1:153516399
CBX6	314.969	176.878	-0.8306	0.0004	DOWN	No	No	1	CBX6_exon_chr22:39263206	1	1	0	NA	1	1	1	1	NA	CBX6_exon_chr22:39263206
ATP6V1F	339.596	181.882	-0.8979	0.0004	DOWN	No	No	1	ATP6V1F_exon_chr7:128505430	1	1	0	NA	1	1	1	1	NA	ATP6V1F_exon_chr7:128505430
RBM38	191.947	95.1581	-1.013	0.0004	DOWN	No	No	1	RBM38_exon_chr20:55982598	1	1	0	NA	1	1	1	1	NA	RBM38_exon_chr20:55982598
RWDD2B	121.753	56.5636	-1.119	0.0004	DOWN	No	No	2	RWDD2B_exon_chr21:30378972_x000D_ RWDD2B_exon_chr21:30380444	0.8706_x000D_ 0.1294	0.819_x000D_ 0.181	-0.0516_x000D_ 0.0516	NA_x000D_ NA	1_x000D_ 5	1.0_x000D_ 0.7356	1.0_x000D_ 0.8146	1.0_x000D_ 0.079	NA_x000D_ NA	RWDD2B_exon_chr21:30378972	RWDD2B_exon_chr21:30380444
KLK6	109.577	49.5913	-1.1423	0.0004	DOWN	No	No	1	KLK6_exon_chr19:51462572	1	1	0	NA	1	1	1	1	NA	KLK6_exon_chr19:51462572
ZFP62	72.6223	19.9169	-1.8816	0.0004	DOWN	No	No	1	ZFP62_exon_chr5:180278493	1	1	0	NA	3	0.419	0.4839	0.0649	NA	ZFP62_exon_chr5:180278493
MRPL3	1002.26	611.371	-0.7112	0.0004	DOWN	No	Yes	1	MRPL3_exon_chr3:131181719	1	1	0	NA	3	0.8386	0.6503	-0.1884	Shortening	MRPL3_exon_chr3:131181719
SMU1	218.216	118.805	-0.8749	0.0004	DOWN	No	Yes	2	SMU1_exon_chr9:33047389_x000D_ SMU1_exon_chr9:33068932	0.8824_x000D_ 0.1176	0.7936_x000D_ 0.2064	-0.0887_x000D_ 0.0887	NA_x000D_ NA	10_x000D_ 1	0.8124_x000D_ 1.0	0.5089_x000D_ 1.0	-0.3035_x000D_ 1.0	Both_x000D_ NA	SMU1_exon_chr9:33047389	SMU1_exon_chr9:33068932
TRIM59-IFT80	158.095	80.4216	-0.976	0.0004	DOWN	No	Yes	1	TRIM59-IFT80_exon_chr3:160156974	1	1	0	NA	5	0.8513	0.6349	-0.2165	Shortening	TRIM59-IFT80_exon_chr3:160156974
ODC1	830.793	445.029	-0.8994	0.0005	DOWN	No	No	1	ODC1_exon_chr2:10580994	1	1	0	NA	1	1	1	1	NA	ODC1_exon_chr2:10580994
WARS1	143.897	74.2765	-0.9567	0.0005	DOWN	No	No	1	WARS1_exon_chr14:100801373	1	1	0	NA	4	0.8781	0.8295	-0.0486	NA	WARS1_exon_chr14:100801373
SMG1P2	123.833	59.2385	-1.0663	0.0005	DOWN	No	No	1	SMG1P2_exon_chr16:29556771	1	1	0	NA	1	1	1	1	NA	SMG1P2_exon_chr16:29556771
RARG	55.9435	22.2272	-1.3347	0.0005	DOWN	No	No	1	RARG_exon_chr12:53605647	1	1	0	NA	1	1	1	1	NA	RARG_exon_chr12:53605647
ADAM19	55.8279	20.1212	-1.479	0.0005	DOWN	No	No	1	ADAM19_exon_chr5:156908010	1	1	0	NA	1	1	1	1	NA	ADAM19_exon_chr5:156908010
TMEM192	37.9062	10.1464	-1.935	0.0005	DOWN	No	Yes	1	TMEM192_exon_chr4:166000948	1	1	0	NA	7	NA	NA	NA	Both	TMEM192_exon_chr4:166000948
GAS5	581.926	363.416	-0.6815	0.0006	DOWN	No	No	1	GAS5_exon_chr1:173833583	1	1	0	NA	1	1	1	1	NA	GAS5_exon_chr1:173833583
TKFC	212.776	115.247	-0.8797	0.0006	DOWN	No	No	1	TKFC_exon_chr11:61113766	1	1	0	NA	1	1	1	1	NA	TKFC_exon_chr11:61113766
MPHOSPH6	154.31	73.3608	-1.08	0.0006	DOWN	No	No	1	MPHOSPH6_exon_chr16:82182468	1	1	0	NA	3	0.9402	0.8621	-0.0781	NA	MPHOSPH6_exon_chr16:82182468
SLC35A3	45.103	11.1593	-2.0164	0.0007	DOWN	No	No	1	SLC35A3_exon_chr1:100487941	1	1	0	NA	4	NA	NA	NA	NA	SLC35A3_exon_chr1:100487941
ZBTB44	132.505	66.9678	-0.9827	0.0007	DOWN	No	Yes	1	ZBTB44_exon_chr11:130104168	1	1	0	NA	7	0.9736	0.5162	-0.4574	Shortening	ZBTB44_exon_chr11:130104168
ILF3	1731.48	1146.87	-0.5946	0.0008	DOWN	No	No	4	ILF3_exon_chr19:10791694_x000D_ ILF3_exon_chr19:10791894_x000D_ ILF3_exon_chr19:10795091_x000D_ ILF3_exon_chr19:10799854	0.0665_x000D_ 0.2911_x000D_ 0.0704_x000D_ 0.552	0.0771_x000D_ 0.2749_x000D_ 0.1292_x000D_ 0.4951	0.0105_x000D_ -0.0162_x000D_ 0.0588_x000D_ -0.0569	NA_x000D_ NA_x000D_ NA_x000D_ NA	1_x000D_ 5_x000D_ 1_x000D_ 1	1.0_x000D_ 0.1543_x000D_ 1.0_x000D_ 1.0	1.0_x000D_ 0.2161_x000D_ 1.0_x000D_ 1.0	1.0_x000D_ 0.0618_x000D_ 1.0_x000D_ 1.0	NA_x000D_ NA_x000D_ NA_x000D_ NA	ILF3_exon_chr19:10791694	ILF3_exon_chr19:10791894	ILF3_exon_chr19:10795091	ILF3_exon_chr19:10799854
STMN3	627.122	398.289	-0.6538	0.0008	DOWN	No	No	1	STMN3_exon_chr20:62272750	1	1	0	NA	1	1	1	1	NA	STMN3_exon_chr20:62272750
CDCA7L	185.733	111.697	-0.7351	0.0008	DOWN	No	No	2	CDCA7L_exon_chr7:21941970_x000D_ CDCA7L_exon_chr7:21948125	0.7738_x000D_ 0.2262	0.7244_x000D_ 0.2756	-0.0494_x000D_ 0.0494	NA_x000D_ NA	1_x000D_ 3	1.0_x000D_ 0.8981	1.0_x000D_ 0.7988	1.0_x000D_ -0.0993	NA_x000D_ NA	CDCA7L_exon_chr7:21941970	CDCA7L_exon_chr7:21948125
SLC30A9	138.462	73.4808	-0.9213	0.0008	DOWN	No	No	1	SLC30A9_exon_chr4:42088098	1	1	0	NA	1	1	1	1	NA	SLC30A9_exon_chr4:42088098
BOLA2-SMG1P6	121.639	60.3156	-1.0164	0.0008	DOWN	No	No	1	BOLA2-SMG1P6_exon_chr16:29455009	1	1	0	NA	1	1	1	1	NA	BOLA2-SMG1P6_exon_chr16:29455009
LYSMD3	53.2344	14.2422	-1.8864	0.0008	DOWN	No	No	1	LYSMD3_exon_chr5:89815301	1	1	0	NA	2	NA	NA	NA	NA	LYSMD3_exon_chr5:89815301
HNRNPR	883.99	518.177	-0.7729	0.0009	DOWN	No	No	2	HNRNPR_exon_chr1:23637559_x000D_ HNRNPR_exon_chr1:23637815	0.5423_x000D_ 0.4159	0.5238_x000D_ 0.452	-0.0185_x000D_ 0.0361	NA_x000D_ NA	5_x000D_ 2	0.6274_x000D_ 0.3837	0.533_x000D_ 0.3875	-0.0944_x000D_ 0.0038	NA_x000D_ NA	HNRNPR_exon_chr1:23637559	HNRNPR_exon_chr1:23637815
DHX33	95.2976	43.4825	-1.1324	0.0009	DOWN	No	No	1	DHX33_exon_chr17:5347833	1	1	0	NA	1	1	1	1	NA	DHX33_exon_chr17:5347833
RABGGTB	261.734	153.223	-0.7701	0.0009	DOWN	No	Yes	1	RABGGTB_exon_chr1:76260194	1	1	0	NA	3	0.1741	0.0611	-0.113	Shortening	RABGGTB_exon_chr1:76260194
FOSL2	83.648	37.9401	-1.1512	0.0009	DOWN	No	Yes	1	FOSL2_exon_chr2:28634796	1	1	0	NA	6	0.8682	0.4042	-0.464	Shortening	FOSL2_exon_chr2:28634796
PJA2	84.6618	29.1711	-1.5319	0.0009	DOWN	No	Yes	1	PJA2_exon_chr5:108673057	1	1	0	NA	5	0.986	0.6488	-0.3372	Shortening	PJA2_exon_chr5:108673057
PPCS	343.077	204.735	-0.7422	0.001	DOWN	No	No	1	PPCS_exon_chr1:42925273	1	1	0	NA	1	1	1	1	NA	PPCS_exon_chr1:42925273
COQ9	190.02	108.719	-0.8116	0.001	DOWN	No	No	1	COQ9_exon_chr16:57494500	1	1	0	NA	1	1	1	1	NA	COQ9_exon_chr16:57494500
MOSPD1	206.446	106.822	-0.9433	0.0011	DOWN	No	Yes	1	MOSPD1_exon_chrX:134023222	1	1	0	NA	4	1	0.559	-0.441	Shortening	MOSPD1_exon_chrX:134023222
NUP133	147.441	72.0909	-1.0286	0.0011	DOWN	No	Yes	1	NUP133_exon_chr1:229577787	1	1	0	NA	6	0.8609	0.4798	-0.3811	Shortening	NUP133_exon_chr1:229577787
MRPS12	191.974	103.734	-0.8811	0.0012	DOWN	No	No	1	MRPS12_exon_chr19:39422972	1	1	0	NA	3	0.1039	0.0618	-0.042	NA	MRPS12_exon_chr19:39422972
KCNN4	332.893	200.819	-0.7273	0.0013	DOWN	No	No	1	KCNN4_exon_chr19:44271241	1	1	0	NA	1	1	1	1	NA	KCNN4_exon_chr19:44271241
KXD1	505.256	290.528	-0.7968	0.0013	DOWN	No	No	1	KXD1_exon_chr19:18679211	1	1	0	NA	1	1	1	1	NA	KXD1_exon_chr19:18679211
SRC	158.119	83.3049	-0.9295	0.0013	DOWN	No	No	1	SRC_exon_chr20:36031573	1	1	0	NA	1	1	1	1	NA	SRC_exon_chr20:36031573
RNF166	109.511	55.6997	-0.9854	0.0013	DOWN	No	No	1	RNF166_exon_chr16:88764041	1	1	0	NA	1	1	1	1	NA	RNF166_exon_chr16:88764041
NFAT5	189.523	104.453	-0.8674	0.0013	DOWN	No	Yes	2	NFAT5_exon_chr16:69725651_x000D_ NFAT5_exon_chr16:69730262	0.4366_x000D_ 0.5634	0.3961_x000D_ 0.6039	-0.0405_x000D_ 0.0405	NA_x000D_ NA	1_x000D_ 6	1.0_x000D_ 0.9723	1.0_x000D_ 0.8163	1.0_x000D_ -0.156	NA_x000D_ Shortening	NFAT5_exon_chr16:69725651	NFAT5_exon_chr16:69730262
URGCP-MRPS24	426.271	259.665	-0.7144	0.0014	DOWN	No	No	1	URGCP-MRPS24_exon_chr7:43906581	1	1	0	NA	1	1	1	1	NA	URGCP-MRPS24_exon_chr7:43906581
PHPT1	199.203	109.405	-0.8684	0.0014	DOWN	No	No	1	PHPT1_exon_chr9:139745206	1	1	0	NA	1	1	1	1	NA	PHPT1_exon_chr9:139745206
HBG2	22.6698	3.8146	-2.6132	0.0014	DOWN	No	No	1	HBG2_exon_chr11:5274635	1	1	0	NA	1	1	1	1	NA	HBG2_exon_chr11:5274635
EPCAM	826.144	543.102	-0.6057	0.0014	DOWN	No	Yes	1	EPCAM_exon_chr2:47613710	1	1	0	NA	4	0.3689	0.1936	-0.1753	Shortening	EPCAM_exon_chr2:47613710
TMEM38B	149.286	84.1655	-0.8185	0.0014	DOWN	No	Yes	1	TMEM38B_exon_chr9:108536145	1	1	0	NA	5	0.7324	0.3913	-0.3412	Both	TMEM38B_exon_chr9:108536145
MRPL33	397.077	254.828	-0.6351	0.0015	DOWN	No	No	1	MRPL33_exon_chr2:28002299	1	1	0	NA	4	0.7196	0.6931	-0.0265	NA	MRPL33_exon_chr2:28002299
MRPL12	1043.69	624.617	-0.74	0.0016	DOWN	No	No	1	MRPL12_exon_chr17:79674153	1	1	0	NA	1	1	1	1	NA	MRPL12_exon_chr17:79674153
TOMM34	158.727	91.3227	-0.7964	0.0016	DOWN	No	No	2	TOMM34_exon_chr20:43571854_x000D_ TOMM34_exon_chr20:43577518	0.9341_x000D_ 0.0659	0.8921_x000D_ 0.1079	-0.0419_x000D_ 0.0419	NA_x000D_ NA	1_x000D_ 2	1.0_x000D_ 0.1497	1.0_x000D_ 0.1154	1.0_x000D_ -0.0343	NA_x000D_ NA	TOMM34_exon_chr20:43571854	TOMM34_exon_chr20:43577518
AEN	367.723	203.888	-0.8452	0.0016	DOWN	No	No	1	AEN_exon_chr15:89173288	1	1	0	NA	1	1	1	1	NA	AEN_exon_chr15:89173288
GRHPR	492.034	273.404	-0.8466	0.0016	DOWN	No	No	1	GRHPR_exon_chr9:37436657	1	1	0	NA	1	1	1	1	NA	GRHPR_exon_chr9:37436657
ESRRA	226.441	123.284	-0.8768	0.0016	DOWN	No	No	1	ESRRA_exon_chr11:64083178	1	1	0	NA	1	1	1	1	NA	ESRRA_exon_chr11:64083178
D2HGDH	84.8957	26.3494	-1.6843	0.0016	DOWN	No	No	1	D2HGDH_exon_chr2:242707124	1	1	0	NA	1	1	1	1	NA	D2HGDH_exon_chr2:242707124
ALOX12B	22.186	4.0254	-2.4717	0.0016	DOWN	No	No	1	ALOX12B_exon_chr17:7976268	1	1	0	NA	1	1	1	1	NA	ALOX12B_exon_chr17:7976268
GNL3	663.2	424.575	-0.6424	0.0017	DOWN	No	No	4	GNL3_exon_chr3:52720784_x000D_ GNL3_exon_chr3:52724607_x000D_ GNL3_exon_chr3:52727647_x000D_ GNL3_exon_chr3:52728208	0.0921_x000D_ 0.0799_x000D_ 0.1991_x000D_ 0.6143	0.0732_x000D_ 0.0764_x000D_ 0.1865_x000D_ 0.65	-0.0189_x000D_ -0.0035_x000D_ -0.0126_x000D_ 0.0356	NA_x000D_ NA_x000D_ NA_x000D_ NA	1_x000D_ 1_x000D_ 3_x000D_ 1	1.0_x000D_ 1.0_x000D_ 0.5907_x000D_ 1.0	1.0_x000D_ 1.0_x000D_ 0.5268_x000D_ 1.0	1.0_x000D_ 1.0_x000D_ -0.0639_x000D_ 1.0	NA_x000D_ NA_x000D_ NA_x000D_ NA	GNL3_exon_chr3:52720784	GNL3_exon_chr3:52724607	GNL3_exon_chr3:52727647	GNL3_exon_chr3:52728208
RBP1	338.956	199.158	-0.768	0.0017	DOWN	No	No	1	RBP1_exon_chr3:139236522	1	1	0	NA	1	1	1	1	NA	RBP1_exon_chr3:139236522
MPV17L2	136.41	69.2163	-0.9725	0.0017	DOWN	No	No	1	MPV17L2_exon_chr19:18306808	1	1	0	NA	1	1	1	1	NA	MPV17L2_exon_chr19:18306808
CPNE7	139.627	37.5592	-1.8931	0.0017	DOWN	No	No	1	CPNE7_exon_chr16:89662891	1	1	0	NA	1	1	1	1	NA	CPNE7_exon_chr16:89662891
LIG1	306.766	172.238	-0.8349	0.0018	DOWN	No	No	2	LIG1_exon_chr19:48618989_x000D_ LIG1_exon_chr19:48653098	0.9011_x000D_ 0.0989	0.8874_x000D_ 0.1126	-0.0138_x000D_ 0.0138	NA_x000D_ NA	1_x000D_ 1	1.0_x000D_ 1.0	1.0_x000D_ 1.0	1.0_x000D_ 1.0	NA_x000D_ NA	LIG1_exon_chr19:48618989	LIG1_exon_chr19:48653098
MRTFB	73.911	32.6701	-1.1802	0.0018	DOWN	No	No	1	MRTFB_exon_chr16:14354765	1	1	0	NA	1	1	1	1	NA	MRTFB_exon_chr16:14354765
RBBP4	420.486	276.597	-0.605	0.0019	DOWN	No	No	1	RBBP4_exon_chr1:33145240	1	1	0	NA	5	0.1448	0.0855	-0.0594	NA	RBBP4_exon_chr1:33145240
HOXB9	115.465	63.941	-0.8542	0.0019	DOWN	No	No	1	HOXB9_exon_chr17:46700497	1	1	0	NA	1	1	1	1	NA	HOXB9_exon_chr17:46700497
GATD3B	264.815	131.322	-1.0142	0.0019	DOWN	No	No	1	GATD3B_exon_chr21:45564702	1	1	0	NA	1	1	1	1	NA	GATD3B_exon_chr21:45564702
CAD	133.496	64.0591	-1.0716	0.0019	DOWN	No	No	1	CAD_exon_chr2:27466283	1	1	0	NA	1	1	1	1	NA	CAD_exon_chr2:27466283
PRR12	129.237	58.1198	-1.1546	0.0019	DOWN	No	No	2	PRR12_exon_chr19:50093627_x000D_ PRR12_exon_chr19:50128717	0.0941_x000D_ 0.9059	0.138_x000D_ 0.862	0.0439_x000D_ -0.0439	NA_x000D_ NA	1_x000D_ 1	1.0_x000D_ 1.0	1.0_x000D_ 1.0	1.0_x000D_ 1.0	NA_x000D_ NA	PRR12_exon_chr19:50093627	PRR12_exon_chr19:50128717
EML1	15.612	1.4826	-3.3624	0.0019	DOWN	No	No	1	EML1_exon_chr14:100406323	1	1	0	NA	3	NA	NA	NA	NA	EML1_exon_chr14:100406323
CDCA7	70.2223	29.2063	-1.2413	0.002	DOWN	No	No	1	CDCA7_exon_chr2:174232361	1	1	0	NA	3	0.813	0.686	-0.127	NA	CDCA7_exon_chr2:174232361
STIMATE	51.7245	19.6595	-1.3907	0.002	DOWN	No	No	1	STIMATE_exon_chr3:52872001	1	1	0	NA	1	1	1	1	NA	STIMATE_exon_chr3:52872001
NTSR1	279.482	156.328	-0.8439	0.0021	DOWN	No	No	1	NTSR1_exon_chr20:61391369	1	1	0	NA	1	1	1	1	NA	NTSR1_exon_chr20:61391369
PHLDA3	122.174	66.8781	-0.8788	0.0021	DOWN	No	No	1	PHLDA3_exon_chr1:201435306	1	1	0	NA	1	1	1	1	NA	PHLDA3_exon_chr1:201435306
MRPS22	261.432	156.142	-0.7465	0.0022	DOWN	No	Yes	2	MRPS22_exon_chr3:139071488_x000D_ MRPS22_exon_chr3:139075760	0.0505_x000D_ 0.9495	0.0839_x000D_ 0.9161	0.0334_x000D_ -0.0334	NA_x000D_ NA	3_x000D_ 1	0.1661_x000D_ 1.0	0.0601_x000D_ 1.0	-0.106_x000D_ 1.0	Shortening_x000D_ NA	MRPS22_exon_chr3:139071488	MRPS22_exon_chr3:139075760
LTBP3	145.466	86.7252	-0.752	0.0023	DOWN	No	No	1	LTBP3_exon_chr11:65306702	1	1	0	NA	2	0.1552	0.1209	-0.0343	NA	LTBP3_exon_chr11:65306702
SMG1P5	122.294	60.98	-1.0076	0.0023	DOWN	No	No	1	SMG1P5_exon_chr16:30296778	1	1	0	NA	1	1	1	1	NA	SMG1P5_exon_chr16:30296778
S100A14	1315.87	777.658	-0.7598	0.0024	DOWN	No	No	1	S100A14_exon_chr1:153587498	1	1	0	NA	1	1	1	1	NA	S100A14_exon_chr1:153587498
DNAAF5	343.657	189.233	-0.8598	0.0024	DOWN	No	No	1	DNAAF5_exon_chr7:825153	1	1	0	NA	1	1	1	1	NA	DNAAF5_exon_chr7:825153
DUSP9	95.4827	50.9947	-0.918	0.0024	DOWN	No	No	1	DUSP9_exon_chrX:152915434	1	1	0	NA	1	1	1	1	NA	DUSP9_exon_chrX:152915434
SURF1	72.8742	32.0474	-1.1924	0.0024	DOWN	No	No	1	SURF1_exon_chr9:136218837	1	1	0	NA	1	1	1	1	NA	SURF1_exon_chr9:136218837
PYGL	437.383	269.023	-0.6997	0.0025	DOWN	No	No	1	PYGL_exon_chr14:51372274	1	1	0	NA	1	1	1	1	NA	PYGL_exon_chr14:51372274
MYC	1614.05	920.087	-0.81	0.0025	DOWN	No	No	1	MYC_exon_chr8:128752641	1	1	0	NA	1	1	1	1	NA	MYC_exon_chr8:128752641
HBE1	121.484	47.0855	-1.3746	0.0025	DOWN	No	No	1	HBE1_exon_chr11:5289827	1	1	0	NA	1	1	1	1	NA	HBE1_exon_chr11:5289827
MYEOV	81.5345	35.309	-1.2008	0.0026	DOWN	No	No	1	MYEOV_exon_chr11:69062699	1	1	0	NA	1	1	1	1	NA	MYEOV_exon_chr11:69062699
MEX3A	79.1067	34.8934	-1.2039	0.0026	DOWN	No	No	1	MEX3A_exon_chr1:156047473	1	1	0	NA	4	0.8369	0.8137	-0.0232	NA	MEX3A_exon_chr1:156047473
KBTBD6	46.7	18.0473	-1.3844	0.0026	DOWN	No	No	1	KBTBD6_exon_chr13:41706938	1	1	0	NA	1	1	1	1	NA	KBTBD6_exon_chr13:41706938
CCNG1	285.93	139.953	-1.0315	0.0026	DOWN	No	Yes	1	CCNG1_exon_chr5:162870679	1	1	0	NA	5	0.9524	0.7454	-0.2071	Shortening	CCNG1_exon_chr5:162870679
TEAD1	126.66	73.8267	-0.7737	0.0027	DOWN	No	Yes	2	TEAD1_exon_chr11:12951720_x000D_ TEAD1_exon_chr11:12958655	0.0_x000D_ 1.0	0.1074_x000D_ 0.8926	0.1074_x000D_ -0.1074	Up_x000D_ Down	9_x000D_ 1	0.9935_x000D_ 1.0	0.6085_x000D_ 1.0	-0.385_x000D_ 1.0	Shortening_x000D_ NA	TEAD1_exon_chr11:12951720	TEAD1_exon_chr11:12958655
MAGEB2	795.579	523.707	-0.6023	0.0028	DOWN	No	No	1	MAGEB2_exon_chrX:30236692	1	1	0	NA	1	1	1	1	NA	MAGEB2_exon_chrX:30236692
SNHG12	539.064	285.287	-0.915	0.0028	DOWN	No	No	1	SNHG12_exon_chr1:28905334	1	1	0	NA	1	1	1	1	NA	SNHG12_exon_chr1:28905334
NUBP2	243.64	153.742	-0.665	0.003	DOWN	No	No	1	NUBP2_exon_chr16:1838569	1	1	0	NA	1	1	1	1	NA	NUBP2_exon_chr16:1838569
VWA1	126.478	66.8106	-0.9206	0.003	DOWN	No	No	1	VWA1_exon_chr1:1374460	1	1	0	NA	1	1	1	1	NA	VWA1_exon_chr1:1374460
EVA1C	85.6323	38.2325	-1.1572	0.003	DOWN	No	No	1	EVA1C_exon_chr21:33887123	1	1	0	NA	1	1	1	1	NA	EVA1C_exon_chr21:33887123
NSFL1C	82.0504	39.8457	-1.0476	0.003	DOWN	No	Yes	1	NSFL1C_exon_chr20:1424556	1	1	0	NA	2	0.9323	0.765	-0.1673	Shortening	NSFL1C_exon_chr20:1424556
ANTXR1	43.4233	14.5884	-1.5752	0.0031	DOWN	No	No	2	ANTXR1_exon_chr2:69372457_x000D_ ANTXR1_exon_chr2:69472356	0.1729_x000D_ 0.8271	0.242_x000D_ 0.758	0.0691_x000D_ -0.0691	NA_x000D_ NA	3_x000D_ 1	NA_x000D_ 1.0	NA_x000D_ 1.0	NA_x000D_ 1.0	NA_x000D_ NA	ANTXR1_exon_chr2:69372457	ANTXR1_exon_chr2:69472356
PCLAF	316.355	207.306	-0.6116	0.0031	DOWN	No	Yes	1	PCLAF_exon_chr15:64658274	1	1	0	NA	8	0.3064	0.194	-0.1123	Shortening	PCLAF_exon_chr15:64658274
SCAMP1	109.738	55.4871	-0.9895	0.0031	DOWN	No	Yes	1	SCAMP1_exon_chr5:77771326	1	1	0	NA	8	0.744	0.5057	-0.2383	Shortening	SCAMP1_exon_chr5:77771326
CUEDC2	165.693	87.5172	-0.9279	0.0032	DOWN	No	No	1	CUEDC2_exon_chr10:104183329	1	1	0	NA	1	1	1	1	NA	CUEDC2_exon_chr10:104183329
TMEM263	163.418	77.185	-1.0911	0.0032	DOWN	No	Yes	1	TMEM263_exon_chr12:107364882	1	1	0	NA	5	0.9432	0.6763	-0.2669	Shortening	TMEM263_exon_chr12:107364882
CCNE1	119.123	54.0077	-1.136	0.0033	DOWN	No	No	1	CCNE1_exon_chr19:30314561	1	1	0	NA	1	1	1	1	NA	CCNE1_exon_chr19:30314561
THOP1	314.488	174.666	-0.848	0.0034	DOWN	No	No	1	THOP1_exon_chr19:2813112	1	1	0	NA	1	1	1	1	NA	THOP1_exon_chr19:2813112
SRM	328.765	173.46	-0.9207	0.0034	DOWN	No	No	1	SRM_exon_chr1:11114942	1	1	0	NA	1	1	1	1	NA	SRM_exon_chr1:11114942
GATB	113.129	59.5661	-0.9263	0.0034	DOWN	No	No	1	GATB_exon_chr4:152592454	1	1	0	NA	2	0.2644	0.2038	-0.0606	NA	GATB_exon_chr4:152592454
ESCO1	123.532	71.2562	-0.8045	0.0034	DOWN	No	Yes	2	ESCO1_exon_chr18:19110451_x000D_ ESCO1_exon_chr18:19155391	0.1838_x000D_ 0.8162	0.1373_x000D_ 0.8627	-0.0464_x000D_ 0.0464	NA_x000D_ NA	6_x000D_ 2	0.4922_x000D_ NA	0.4831_x000D_ NA	-0.0092_x000D_ NA	Both_x000D_ NA	ESCO1_exon_chr18:19110451	ESCO1_exon_chr18:19155391
UBQLN4	79.4581	35.3082	-1.1739	0.0035	DOWN	No	No	1	UBQLN4_exon_chr1:156006921	1	1	0	NA	1	1	1	1	NA	UBQLN4_exon_chr1:156006921
GALNT6	191.662	111.436	-0.7827	0.0036	DOWN	No	No	1	GALNT6_exon_chr12:51748276	1	1	0	NA	1	1	1	1	NA	GALNT6_exon_chr12:51748276
ASMTL	374.891	214.341	-0.8062	0.0036	DOWN	No	No	2	ASMTL_exon_chrX:1522382_x000D_ ASMTL_exon_chrY:1472382	0.4961_x000D_ 0.5039	0.4958_x000D_ 0.5042	-0.0002_x000D_ 0.0002	NA_x000D_ NA	1_x000D_ 1	1.0_x000D_ 1.0	1.0_x000D_ 1.0	1.0_x000D_ 1.0	NA_x000D_ NA	ASMTL_exon_chrX:1522382	ASMTL_exon_chrY:1472382
PITPNB	176.726	99.7321	-0.8186	0.0036	DOWN	No	Yes	1	PITPNB_exon_chr22:28249651	1	1	0	NA	3	0.979	0.8348	-0.1443	Both	PITPNB_exon_chr22:28249651
AASDHPPT	269.616	150.121	-0.8465	0.0036	DOWN	No	Yes	1	AASDHPPT_exon_chr11:105967469	1	1	0	NA	2	0.9382	0.3246	-0.6136	Shortening	AASDHPPT_exon_chr11:105967469
PACSIN3	206.697	120.289	-0.7859	0.0037	DOWN	No	No	1	PACSIN3_exon_chr11:47199597	1	1	0	NA	1	1	1	1	NA	PACSIN3_exon_chr11:47199597
PNN	3711.13	2462.85	-0.5916	0.0038	DOWN	No	No	2	PNN_exon_chr14:39648294_x000D_ PNN_exon_chr14:39649706	0.0753_x000D_ 0.9098	0.0749_x000D_ 0.901	-0.0004_x000D_ -0.0088	NA_x000D_ NA	1_x000D_ 17	1.0_x000D_ 0.2491	1.0_x000D_ 0.2448	1.0_x000D_ -0.0044	NA_x000D_ NA	PNN_exon_chr14:39648294	PNN_exon_chr14:39649706
TTC17	83.5614	39.6597	-1.0746	0.0039	DOWN	No	No	2	TTC17_exon_chr11:43411201_x000D_ TTC17_exon_chr11:43515322	0.1035_x000D_ 0.8816	0.1566_x000D_ 0.8145	0.0532_x000D_ -0.0671	NA_x000D_ NA	1_x000D_ 1	1.0_x000D_ 1.0	1.0_x000D_ 1.0	1.0_x000D_ 1.0	NA_x000D_ NA	TTC17_exon_chr11:43411201	TTC17_exon_chr11:43515322
FKBP4	435.589	284.291	-0.6127	0.004	DOWN	No	No	1	FKBP4_exon_chr12:2912316	1	1	0	NA	6	0.849	0.8172	-0.0317	NA	FKBP4_exon_chr12:2912316
ABHD3	93.1588	47.7825	-0.9571	0.004	DOWN	No	No	2	ABHD3_exon_chr18:19231724_x000D_ ABHD3_exon_chr18:19244191	0.9506_x000D_ 0.0494	0.8565_x000D_ 0.1435	-0.0941_x000D_ 0.0941	NA_x000D_ NA	1_x000D_ 1	1.0_x000D_ 1.0	1.0_x000D_ 1.0	1.0_x000D_ 1.0	NA_x000D_ NA	ABHD3_exon_chr18:19231724	ABHD3_exon_chr18:19244191
ARHGEF12	411.657	260.527	-0.6617	0.004	DOWN	Yes	Yes	3	ARHGEF12_exon_chr11:120300148_x000D_ ARHGEF12_exon_chr11:120319817_x000D_ ARHGEF12_exon_chr11:120355775	0.0526_x000D_ 0.2047_x000D_ 0.7427	0.1074_x000D_ 0.3199_x000D_ 0.5727	0.0548_x000D_ 0.1152_x000D_ -0.17	NA_x000D_ NA_x000D_ Down	1_x000D_ 1_x000D_ 7	1.0_x000D_ 1.0_x000D_ 0.9831	1.0_x000D_ 1.0_x000D_ 0.5004	1.0_x000D_ 1.0_x000D_ -0.4827	NA_x000D_ NA_x000D_ Shortening	ARHGEF12_exon_chr11:120300148	ARHGEF12_exon_chr11:120319817	ARHGEF12_exon_chr11:120355775
NME4	279.765	175.893	-0.67	0.004	DOWN	No	Yes	1	NME4_exon_chr16:450108	1	1	0	NA	3	0.558	0.4867	-0.0714	Shortening	NME4_exon_chr16:450108
PISD	138.571	73.067	-0.918	0.004	DOWN	No	Yes	1	PISD_exon_chr22:32015822	1	1	0	NA	2	0.989	0.7651	-0.2239	Shortening	PISD_exon_chr22:32015822
TSC22D1	858.684	481.668	-0.8344	0.0041	DOWN	No	No	1	TSC22D1_exon_chr13:45009019	1	1	0	NA	1	1	1	1	NA	TSC22D1_exon_chr13:45009019
GAMT	293.746	187.439	-0.6539	0.0041	DOWN	No	Yes	2	GAMT_exon_chr19:1397498_x000D_ GAMT_exon_chr19:1399025	0.7327_x000D_ 0.2673	0.6517_x000D_ 0.3483	-0.0811_x000D_ 0.0811	NA_x000D_ NA	3_x000D_ 1	0.209_x000D_ 1.0	0.1204_x000D_ 1.0	-0.0886_x000D_ 1.0	Both_x000D_ NA	GAMT_exon_chr19:1397498	GAMT_exon_chr19:1399025
FARSA	189.321	109.248	-0.7983	0.0042	DOWN	No	No	1	FARSA_exon_chr19:13033700	1	1	0	NA	1	1	1	1	NA	FARSA_exon_chr19:13033700
RIDA	218.378	125.844	-0.8014	0.0042	DOWN	No	No	1	RIDA_exon_chr8:99115132	1	1	0	NA	3	0.9225	0.8499	-0.0727	NA	RIDA_exon_chr8:99115132
SRXN1	288.038	172.794	-0.7353	0.0043	DOWN	No	No	1	SRXN1_exon_chr20:629561	1	1	0	NA	1	1	1	1	NA	SRXN1_exon_chr20:629561
RPS14	4205.34	2517.65	-0.7404	0.0043	DOWN	No	No	1	RPS14_exon_chr5:149823916	1	1	0	NA	1	1	1	1	NA	RPS14_exon_chr5:149823916
FBXO30	60.5345	23.2121	-1.3715	0.0043	DOWN	No	Yes	1	FBXO30_exon_chr6:146121445	1	1	0	NA	5	0.9527	0.5081	-0.4447	Both	FBXO30_exon_chr6:146121445
TWNK	234.58	138.926	-0.7502	0.0044	DOWN	No	No	1	TWNK_exon_chr10:102752946	1	1	0	NA	3	0.1926	0.1961	0.0035	NA	TWNK_exon_chr10:102752946
QRICH2	14.5779	1.6332	-3.2135	0.0044	DOWN	No	No	1	QRICH2_exon_chr17:74270324	1	1	0	NA	1	1	1	1	NA	QRICH2_exon_chr17:74270324
EPHX2	55.644	16.725	-1.75	0.0046	DOWN	No	No	1	EPHX2_exon_chr8:27401960	1	1	0	NA	1	1	1	1	NA	EPHX2_exon_chr8:27401960
PEBP1	1495.39	959.007	-0.6409	0.0047	DOWN	No	No	1	PEBP1_exon_chr12:118582390	1	1	0	NA	1	1	1	1	NA	PEBP1_exon_chr12:118582390
EXOSC5	210.372	125.713	-0.7408	0.0047	DOWN	No	No	1	EXOSC5_exon_chr19:41892630	1	1	0	NA	1	1	1	1	NA	EXOSC5_exon_chr19:41892630
GRPEL2	267.756	163.245	-0.7104	0.0048	DOWN	No	Yes	1	GRPEL2_exon_chr5:148730480	1	1	0	NA	3	0.9621	0.4217	-0.5403	Shortening	GRPEL2_exon_chr5:148730480
PNPO	214.819	125.031	-0.7911	0.0049	DOWN	No	No	1	PNPO_exon_chr17:46023979	1	1	0	NA	3	0.1414	0.1684	0.027	NA	PNPO_exon_chr17:46023979
DCST1-AS1	17.2884	1.4745	-3.5236	0.0049	DOWN	No	No	1	DCST1-AS1_exon_chr1:155018329	1	1	0	NA	1	1	1	1	NA	DCST1-AS1_exon_chr1:155018329
SNHG8	345.469	221.553	-0.6407	0.005	DOWN	No	No	1	SNHG8_exon_chr4:119200778	1	1	0	NA	1	1	1	1	NA	SNHG8_exon_chr4:119200778
TSFM	169.167	103.618	-0.7138	0.005	DOWN	No	No	1	TSFM_exon_chr12:58189959	1	1	0	NA	1	1	1	1	NA	TSFM_exon_chr12:58189959
RAB21	202.465	116.679	-0.7903	0.005	DOWN	No	Yes	1	RAB21_exon_chr12:72179310	1	1	0	NA	13	0.3387	0.084	-0.2547	Both	RAB21_exon_chr12:72179310
CLDN7	910.351	561.264	-0.697	0.0051	DOWN	No	No	1	CLDN7_exon_chr17:7163855	1	1	0	NA	2	0.277	0.3591	0.0822	NA	CLDN7_exon_chr17:7163855
NEURL4	217.966	119.878	-0.8643	0.0051	DOWN	No	No	1	NEURL4_exon_chr17:7219646	1	1	0	NA	1	1	1	1	NA	NEURL4_exon_chr17:7219646
HAGHL	144.027	64.1347	-1.1674	0.0051	DOWN	No	No	1	HAGHL_exon_chr16:779008	1	1	0	NA	1	1	1	1	NA	HAGHL_exon_chr16:779008
QKI	64.0642	27.8506	-1.2048	0.0051	DOWN	Yes	No	2	QKI_exon_chr6:163899811_x000D_ QKI_exon_chr6:163984451	0.1155_x000D_ 0.8845	0.2722_x000D_ 0.7278	0.1568_x000D_ -0.1568	NA_x000D_ Down	1_x000D_ 1	1.0_x000D_ 1.0	1.0_x000D_ 1.0	1.0_x000D_ 1.0	NA_x000D_ NA	QKI_exon_chr6:163899811	QKI_exon_chr6:163984451
PFKFB2	22.0376	4.1536	-2.3812	0.0051	DOWN	No	No	2	PFKFB2_exon_chr1:207245548_x000D_ PFKFB2_exon_chr1:207252298	0.9799_x000D_ 0.0201	0.7187_x000D_ 0.2813	-0.2612_x000D_ 0.2612	Down_x000D_ NA	2_x000D_ 1	NA_x000D_ 1.0	NA_x000D_ 1.0	NA_x000D_ 1.0	NA_x000D_ NA	PFKFB2_exon_chr1:207245548	PFKFB2_exon_chr1:207252298
SLC5A3	31.5562	7.8255	-1.9965	0.0051	DOWN	No	Yes	1	SLC5A3_exon_chr21:35467161	1	1	0	NA	4	NA	NA	NA	Shortening	SLC5A3_exon_chr21:35467161
MPI	77.0366	36.1585	-1.0954	0.0052	DOWN	No	No	1	MPI_exon_chr15:75189852	1	1	0	NA	1	1	1	1	NA	MPI_exon_chr15:75189852
DDX17	557.413	358.815	-0.6399	0.0053	DOWN	No	No	1	DDX17_exon_chr22:38882445	1	1	0	NA	1	1	1	1	NA	DDX17_exon_chr22:38882445
RAB40B	106.641	49.4567	-1.1108	0.0053	DOWN	No	No	1	RAB40B_exon_chr17:80616010	1	1	0	NA	4	0.1005	0.0671	-0.0334	NA	RAB40B_exon_chr17:80616010
PCGF2	166.579	104.343	-0.6845	0.0053	DOWN	No	Yes	1	PCGF2_exon_chr17:36891853	1	1	0	NA	3	0.3265	0.1542	-0.1724	Shortening	PCGF2_exon_chr17:36891853
ILKAP	232.453	148.458	-0.6509	0.0054	DOWN	No	No	1	ILKAP_exon_chr2:239079317	1	1	0	NA	1	1	1	1	NA	ILKAP_exon_chr2:239079317
ARIH2	147.139	89.6504	-0.7166	0.0054	DOWN	No	Yes	2	ARIH2_exon_chr3:48964894_x000D_ ARIH2_exon_chr3:49020631	0.174_x000D_ 0.826	0.2272_x000D_ 0.7728	0.0532_x000D_ -0.0532	NA_x000D_ NA	3_x000D_ 2	0.6817_x000D_ 0.425	0.2902_x000D_ 0.0861	-0.3915_x000D_ -0.339	Both_x000D_ Shortening	ARIH2_exon_chr3:48964894	ARIH2_exon_chr3:49020631
ISYNA1	126.057	75.9136	-0.7301	0.0055	DOWN	No	No	1	ISYNA1_exon_chr19:18545927	1	1	0	NA	4	0.8083	0.7786	-0.0298	NA	ISYNA1_exon_chr19:18545927
PRRX2	276.105	159.778	-0.7907	0.0055	DOWN	No	No	1	PRRX2_exon_chr9:132484495	1	1	0	NA	1	1	1	1	NA	PRRX2_exon_chr9:132484495
CBX7	55.821	23.7867	-1.2245	0.0056	DOWN	No	No	1	CBX7_exon_chr22:39530053	1	1	0	NA	1	1	1	1	NA	CBX7_exon_chr22:39530053
PATJ	60.6659	24.7651	-1.2779	0.0056	DOWN	No	No	1	PATJ_exon_chr1:62626579	1	1	0	NA	2	0.2888	0.1799	-0.1089	NA	PATJ_exon_chr1:62626579
MRPL10	204.868	133.729	-0.6128	0.0058	DOWN	No	No	1	MRPL10_exon_chr17:45901824	1	1	0	NA	1	1	1	1	NA	MRPL10_exon_chr17:45901824
TRIB1	565.038	365.919	-0.6278	0.0058	DOWN	No	No	1	TRIB1_exon_chr8:126448247	1	1	0	NA	1	1	1	1	NA	TRIB1_exon_chr8:126448247
OXLD1	121.997	60.0192	-1.033	0.0058	DOWN	No	No	1	OXLD1_exon_chr17:79633635	1	1	0	NA	1	1	1	1	NA	OXLD1_exon_chr17:79633635
MRPS18B	233.121	148.142	-0.6543	0.0059	DOWN	No	No	1	MRPS18B_exon_chr6:30593278	1	1	0	NA	1	1	1	1	NA	MRPS18B_exon_chr6:30593278
SNHG5	160.241	96.522	-0.7307	0.0059	DOWN	No	No	1	SNHG5_exon_chr6:86387377	1	1	0	NA	2	0.3006	0.2385	-0.0621	NA	SNHG5_exon_chr6:86387377
COQ8A	90.9585	45.4779	-1.001	0.0059	DOWN	No	No	1	COQ8A_exon_chr1:227174153	1	1	0	NA	1	1	1	1	NA	COQ8A_exon_chr1:227174153
GTF2H3	278.695	173.369	-0.6783	0.0059	DOWN	No	Yes	1	GTF2H3_exon_chr12:124144712	1	1	0	NA	6	0.9201	0.4886	-0.4314	Shortening	GTF2H3_exon_chr12:124144712
REXO4	136.577	72.6296	-0.909	0.006	DOWN	No	No	2	REXO4_exon_chr9:136272196_x000D_ REXO4_exon_chr9:136280131	0.9786_x000D_ 0.0214	0.8839_x000D_ 0.1161	-0.0947_x000D_ 0.0947	NA_x000D_ NA	1_x000D_ 1	1.0_x000D_ 1.0	1.0_x000D_ 1.0	1.0_x000D_ 1.0	NA_x000D_ NA	REXO4_exon_chr9:136272196	REXO4_exon_chr9:136280131
AP4M1	60.1568	26.7391	-1.1783	0.006	DOWN	No	No	1	AP4M1_exon_chr7:99704280	1	1	0	NA	1	1	1	1	NA	AP4M1_exon_chr7:99704280
PHF6	91.9659	47.165	-0.974	0.006	DOWN	No	Yes	1	PHF6_exon_chrX:133559230	1	1	0	NA	3	0.9267	0.6462	-0.2805	Shortening	PHF6_exon_chrX:133559230
CEP170B	91.2895	48.5518	-0.9062	0.0062	DOWN	No	No	1	CEP170B_exon_chr14:105361047	1	1	0	NA	1	1	1	1	NA	CEP170B_exon_chr14:105361047
SYT7	130.977	65.0519	-1.0196	0.0062	DOWN	No	No	1	SYT7_exon_chr11:61286203	1	1	0	NA	3	0.4924	0.5804	0.088	NA	SYT7_exon_chr11:61286203
NCK1	54.0199	22.8859	-1.2229	0.0062	DOWN	No	Yes	1	NCK1_exon_chr3:136667100	1	1	0	NA	5	0.8803	0.5411	-0.3393	Shortening	NCK1_exon_chr3:136667100
SNORA1	16.5082	0.5898	-4.7642	0.0063	DOWN	No	No	1	SNORA1_exon_chr11:93465665	1	1	0	NA	1	1	1	1	NA	SNORA1_exon_chr11:93465665
MRPL49	423.471	253.934	-0.7336	0.0064	DOWN	No	Yes	1	MRPL49_exon_chr11:64893197	1	1	0	NA	3	0.9607	0.8447	-0.116	Shortening	MRPL49_exon_chr11:64893197
UQCC2	106.477	60.8404	-0.816	0.0065	DOWN	No	No	1	UQCC2_exon_chr6:33665527	1	1	0	NA	2	0.0581	0.0725	0.0144	NA	UQCC2_exon_chr6:33665527
GDA	53.5322	21.0492	-1.3321	0.0066	DOWN	No	No	2	GDA_exon_chr9:74863187_x000D_ GDA_exon_chr9:74868153	0.9665_x000D_ 0.0335	0.7045_x000D_ 0.2955	-0.262_x000D_ 0.262	Down_x000D_ NA	2_x000D_ 1	NA_x000D_ 1.0	NA_x000D_ 1.0	NA_x000D_ 1.0	NA_x000D_ NA	GDA_exon_chr9:74863187	GDA_exon_chr9:74868153
CDS1	86.7433	41.5911	-1.0583	0.0066	DOWN	No	Yes	1	CDS1_exon_chr4:85569709	1	1	0	NA	6	0.7665	0.5914	-0.1751	Shortening	CDS1_exon_chr4:85569709
MTHFD1	270.689	171.47	-0.6586	0.0068	DOWN	No	No	2	MTHFD1_exon_chr14:64886531_x000D_ MTHFD1_exon_chr14:64926476	0.1782_x000D_ 0.8218	0.1309_x000D_ 0.8691	-0.0473_x000D_ 0.0473	NA_x000D_ NA	1_x000D_ 1	1.0_x000D_ 1.0	1.0_x000D_ 1.0	1.0_x000D_ 1.0	NA_x000D_ NA	MTHFD1_exon_chr14:64886531	MTHFD1_exon_chr14:64926476
ADCK1	20.3415	4.362	-2.2481	0.0068	DOWN	No	No	1	ADCK1_exon_chr14:78399562	1	1	0	NA	1	1	1	1	NA	ADCK1_exon_chr14:78399562
NUP188	380.136	242.187	-0.653	0.0069	DOWN	No	No	1	NUP188_exon_chr9:131768780	1	1	0	NA	1	1	1	1	NA	NUP188_exon_chr9:131768780
PVT1	91.0313	50.468	-0.8487	0.0069	DOWN	No	No	1	PVT1_exon_chr8:129113225	1	1	0	NA	1	1	1	1	NA	PVT1_exon_chr8:129113225
SDHD	314.694	208.491	-0.5915	0.0069	DOWN	No	Yes	1	SDHD_exon_chr11:111965528	1	1	0	NA	3	0.8676	0.7565	-0.1111	Both	SDHD_exon_chr11:111965528
RBIS	456.855	304.259	-0.586	0.007	DOWN	No	No	1	RBIS_exon_chr8:86126860	1	1	0	NA	1	1	1	1	NA	RBIS_exon_chr8:86126860
CCDC124	163.824	101.107	-0.6973	0.0072	DOWN	No	No	1	CCDC124_exon_chr19:18054316	1	1	0	NA	1	1	1	1	NA	CCDC124_exon_chr19:18054316
ZSWIM9	643.525	393.552	-0.7082	0.0073	DOWN	No	No	1	ZSWIM9_exon_chr19:48697909	1	1	0	NA	4	0.2024	0.196	-0.0064	NA	ZSWIM9_exon_chr19:48697909
C16orf91	72.8454	36.0622	-0.9958	0.0073	DOWN	No	No	1	C16orf91_exon_chr16:1470613	1	1	0	NA	1	1	1	1	NA	C16orf91_exon_chr16:1470613
RPUSD4	149.839	80.9425	-0.8965	0.0074	DOWN	No	No	1	RPUSD4_exon_chr11:126073552	1	1	0	NA	2	0.108	0.0856	-0.0224	NA	RPUSD4_exon_chr11:126073552
HSPBP1	314.433	185.351	-0.7614	0.0074	DOWN	No	Yes	1	HSPBP1_exon_chr19:55774050	1	1	0	NA	2	0.8563	0.7057	-0.1506	Shortening	HSPBP1_exon_chr19:55774050
TERF2	89.0755	43.9567	-1.0149	0.0075	DOWN	No	Yes	2	TERF2_exon_chr16:69390959_x000D_ TERF2_exon_chr16:69406258	0.9602_x000D_ 0.0398	0.9477_x000D_ 0.0523	-0.0125_x000D_ 0.0125	NA_x000D_ NA	1_x000D_ 5	1.0_x000D_ 0.8224	1.0_x000D_ 0.7427	1.0_x000D_ -0.0797	NA_x000D_ Shortening	TERF2_exon_chr16:69390959	TERF2_exon_chr16:69406258
ARHGAP27P1-BPTFP1-KPNA2P3	418.462	271.799	-0.62	0.0076	DOWN	No	No	1	ARHGAP27P1-BPTFP1-KPNA2P3_exon_chr17:62746126	1	1	0	NA	1	1	1	1	NA	ARHGAP27P1-BPTFP1-KPNA2P3_exon_chr17:62746126
MTRR	48.8731	19.6324	-1.3033	0.0076	DOWN	No	No	1	MTRR_exon_chr5:7900026	1	1	0	NA	1	1	1	1	NA	MTRR_exon_chr5:7900026
MACROD1	35.9403	12.6851	-1.5	0.0077	DOWN	No	No	1	MACROD1_exon_chr11:63766159	1	1	0	NA	1	1	1	1	NA	MACROD1_exon_chr11:63766159
QDPR	99.3822	54.5727	-0.8574	0.0077	DOWN	No	Yes	1	QDPR_exon_chr4:17488859	1	1	0	NA	4	0.7351	0.4932	-0.2419	Both	QDPR_exon_chr4:17488859
CKS2	337.552	222.727	-0.6036	0.0078	DOWN	No	No	1	CKS2_exon_chr9:91931287	1	1	0	NA	1	1	1	1	NA	CKS2_exon_chr9:91931287
CDH1	147.314	88.9868	-0.7344	0.0078	DOWN	No	No	1	CDH1_exon_chr16:68867192	1	1	0	NA	1	1	1	1	NA	CDH1_exon_chr16:68867192
TNPO2	114.4	64.0691	-0.8378	0.0079	DOWN	No	No	1	TNPO2_exon_chr19:12812057	1	1	0	NA	2	0.1393	0.1884	0.0491	NA	TNPO2_exon_chr19:12812057
POLDIP2	154.29	85.0138	-0.8657	0.008	DOWN	No	No	1	POLDIP2_exon_chr17:26675257	1	1	0	NA	6	0.5272	0.5112	-0.016	NA	POLDIP2_exon_chr17:26675257
EXOSC7	270.518	158.497	-0.7669	0.0082	DOWN	No	No	1	EXOSC7_exon_chr3:45052726	1	1	0	NA	1	1	1	1	NA	EXOSC7_exon_chr3:45052726
NSMF	166.717	92.359	-0.8535	0.0082	DOWN	No	Yes	1	NSMF_exon_chr9:140343943	1	1	0	NA	2	0.1639	0.3071	0.1433	Lengthening	NSMF_exon_chr9:140343943
SIVA1	493.356	325.089	-0.6023	0.0083	DOWN	No	No	1	SIVA1_exon_chr14:105225764	1	1	0	NA	1	1	1	1	NA	SIVA1_exon_chr14:105225764
STK36	20.3656	5.5753	-1.8838	0.0087	DOWN	No	Yes	1	STK36_exon_chr2:219566588	1	1	0	NA	2	NA	NA	NA	Lengthening	STK36_exon_chr2:219566588
DHRS4L1	48.2824	19.7222	-1.3118	0.0088	DOWN	No	No	1	DHRS4L1_exon_chr14:24520062	1	1	0	NA	1	1	1	1	NA	DHRS4L1_exon_chr14:24520062
PADI2	30.5836	9.6198	-1.6636	0.0089	DOWN	No	No	1	PADI2_exon_chr1:17395772	1	1	0	NA	1	1	1	1	NA	PADI2_exon_chr1:17395772
CNOT7	307.251	202.236	-0.6016	0.0089	DOWN	Yes	Yes	2	CNOT7_exon_chr8:17088357_x000D_ CNOT7_exon_chr8:17090046	0.978_x000D_ 0.022	0.8777_x000D_ 0.1223	-0.1004_x000D_ 0.1004	Down_x000D_ Up	4_x000D_ 3	0.7382_x000D_ NA	0.3299_x000D_ NA	-0.4083_x000D_ NA	Shortening_x000D_ Both	CNOT7_exon_chr8:17088357	CNOT7_exon_chr8:17090046
SPAST	35.3015	10.2666	-1.8008	0.0089	DOWN	No	Yes	1	SPAST_exon_chr2:32379442	1	1	0	NA	3	NA	NA	NA	Shortening	SPAST_exon_chr2:32379442
GLOD4	151.922	95.8665	-0.6599	0.0091	DOWN	No	Yes	2	GLOD4_exon_chr17:663478_x000D_ GLOD4_exon_chr17:674701	0.8935_x000D_ 0.1065	0.8879_x000D_ 0.1121	-0.0055_x000D_ 0.0055	NA_x000D_ NA	1_x000D_ 3	1.0_x000D_ 0.7117	1.0_x000D_ 0.595	1.0_x000D_ -0.1167	NA_x000D_ Shortening	GLOD4_exon_chr17:663478	GLOD4_exon_chr17:674701
RAB17	38.7466	14.1068	-1.4604	0.0092	DOWN	No	No	1	RAB17_exon_chr2:238483771	1	1	0	NA	1	1	1	1	NA	RAB17_exon_chr2:238483771
RFC3	120.096	59.2337	-1.0166	0.0092	DOWN	No	Yes	3	RFC3_exon_chr13:34395268_x000D_ RFC3_exon_chr13:34410240_x000D_ RFC3_exon_chr13:34540223	0.0355_x000D_ 0.918_x000D_ 0.0464	0.0371_x000D_ 0.7043_x000D_ 0.2586	0.0016_x000D_ -0.2137_x000D_ 0.2121	NA_x000D_ Down_x000D_ NA	2_x000D_ 2_x000D_ 1	0.9695_x000D_ NA_x000D_ 1.0	0.6951_x000D_ NA_x000D_ 1.0	-0.2744_x000D_ NA_x000D_ 1.0	Shortening_x000D_ NA_x000D_ NA	RFC3_exon_chr13:34395268	RFC3_exon_chr13:34410240	RFC3_exon_chr13:34540223
SLC11A2	80.768	39.2132	-1.0321	0.0092	DOWN	Yes	Yes	2	SLC11A2_exon_chr12:51375586_x000D_ SLC11A2_exon_chr12:51382218	0.0998_x000D_ 0.9002	0.374_x000D_ 0.626	0.2742_x000D_ -0.2742	NA_x000D_ Down	2_x000D_ 2	0.9427_x000D_ NA	0.4589_x000D_ NA	-0.4838_x000D_ NA	Shortening_x000D_ Lengthening	SLC11A2_exon_chr12:51375586	SLC11A2_exon_chr12:51382218
MEF2D	61.0568	27.7623	-1.1301	0.0093	DOWN	No	Yes	1	MEF2D_exon_chr1:156437448	1	1	0	NA	3	0.4728	0.4481	-0.0247	Both	MEF2D_exon_chr1:156437448
PTGES2	283.867	184.783	-0.6198	0.0095	DOWN	No	No	1	PTGES2_exon_chr9:130883552	1	1	0	NA	1	1	1	1	NA	PTGES2_exon_chr9:130883552
DMAC1	108.877	55.1994	-0.9788	0.0095	DOWN	No	No	1	DMAC1_exon_chr9:7798637	1	1	0	NA	1	1	1	1	NA	DMAC1_exon_chr9:7798637
PRPF6	344.381	227.639	-0.5982	0.0097	DOWN	No	No	3	PRPF6_exon_chr20:62616259_x000D_ PRPF6_exon_chr20:62624759_x000D_ PRPF6_exon_chr20:62664193	0.1337_x000D_ 0.2674_x000D_ 0.5988	0.1282_x000D_ 0.2989_x000D_ 0.5729	-0.0056_x000D_ 0.0315_x000D_ -0.0259	NA_x000D_ NA_x000D_ NA	1_x000D_ 1_x000D_ 1	1.0_x000D_ 1.0_x000D_ 1.0	1.0_x000D_ 1.0_x000D_ 1.0	1.0_x000D_ 1.0_x000D_ 1.0	NA_x000D_ NA_x000D_ NA	PRPF6_exon_chr20:62616259	PRPF6_exon_chr20:62624759	PRPF6_exon_chr20:62664193
MRM3	135.493	80.056	-0.7571	0.0097	DOWN	No	No	1	MRM3_exon_chr17:694773	1	1	0	NA	1	1	1	1	NA	MRM3_exon_chr17:694773
HOMEZ	172.83	106.053	-0.7014	0.0098	DOWN	No	No	1	HOMEZ_exon_chr14:23746396	1	1	0	NA	3	0.234	0.2043	-0.0297	NA	HOMEZ_exon_chr14:23746396
ZNF276	104.931	61.2097	-0.7739	0.0098	DOWN	No	No	1	ZNF276_exon_chr16:89804383	1	1	0	NA	3	0.797	0.7265	-0.0705	NA	ZNF276_exon_chr16:89804383
LRRC8B	39.4419	14.0988	-1.4829	0.0098	DOWN	No	Yes	1	LRRC8B_exon_chr1:90058329	1	1	0	NA	4	0.6704	0.3421	-0.3283	Both	LRRC8B_exon_chr1:90058329
MBP	158.722	81.2672	-0.9703	0.0099	DOWN	Yes	Yes	2	MBP_exon_chr18:74729224_x000D_ MBP_exon_chr18:74778341	0.8999_x000D_ 0.0973	0.7801_x000D_ 0.1326	-0.1198_x000D_ 0.0353	Down_x000D_ NA	4_x000D_ 1	0.6102_x000D_ 1.0	0.4382_x000D_ 1.0	-0.172_x000D_ 1.0	Shortening_x000D_ NA	MBP_exon_chr18:74729224	MBP_exon_chr18:74778341
C17orf75	40.6609	16.7819	-1.2964	0.0099	DOWN	No	Yes	1	C17orf75_exon_chr17:30658997	1	1	0	NA	3	0.4536	0.1848	-0.2688	Shortening	C17orf75_exon_chr17:30658997
ERGIC1	211.661	136.312	-0.6352	0.0101	DOWN	No	No	1	ERGIC1_exon_chr5:172377711	1	1	0	NA	1	1	1	1	NA	ERGIC1_exon_chr5:172377711
FOXRED1	73.4445	37.3055	-0.9965	0.0101	DOWN	No	No	1	FOXRED1_exon_chr11:126147329	1	1	0	NA	1	1	1	1	NA	FOXRED1_exon_chr11:126147329
PIK3CD	64.1689	30.0504	-1.1053	0.0102	DOWN	No	No	1	PIK3CD_exon_chr1:9786966	1	1	0	NA	1	1	1	1	NA	PIK3CD_exon_chr1:9786966
KDF1	40.5969	16.6312	-1.3102	0.0104	DOWN	No	No	1	KDF1_exon_chr1:27276642	1	1	0	NA	1	1	1	1	NA	KDF1_exon_chr1:27276642
SPIN4	18.4771	3.942	-2.2246	0.0104	DOWN	No	No	1	SPIN4_exon_chrX:62571211	1	1	0	NA	1	1	1	1	NA	SPIN4_exon_chrX:62571211
BFSP1	65.2648	23.0045	-1.5051	0.0105	DOWN	No	No	1	BFSP1_exon_chr20:17475674	1	1	0	NA	2	0.4281	0.3819	-0.0462	NA	BFSP1_exon_chr20:17475674
EIF4A3	409.218	263.786	-0.6316	0.0107	DOWN	No	No	1	EIF4A3_exon_chr17:78109305	1	1	0	NA	1	1	1	1	NA	EIF4A3_exon_chr17:78109305
LRRC47	153.423	95.3168	-0.6855	0.0107	DOWN	No	No	1	LRRC47_exon_chr1:3697900	1	1	0	NA	1	1	1	1	NA	LRRC47_exon_chr1:3697900
MYOF	312.917	192.724	-0.6976	0.0107	DOWN	No	No	1	MYOF_exon_chr10:95066758	1	1	0	NA	1	1	1	1	NA	MYOF_exon_chr10:95066758
SYTL3	74.9517	36.8752	-1.038	0.0107	DOWN	No	No	1	SYTL3_exon_chr6:159185526	1	1	0	NA	2	0.8188	0.8371	0.0182	NA	SYTL3_exon_chr6:159185526
ELMOD2	143.963	90.2762	-0.6764	0.0109	DOWN	No	Yes	1	ELMOD2_exon_chr4:141471383	1	1	0	NA	3	0.8673	0.341	-0.5263	Shortening	ELMOD2_exon_chr4:141471383
NCOR2	144.133	79.0638	-0.8726	0.0111	DOWN	No	No	2	NCOR2_exon_chr12:124810129_x000D_ NCOR2_exon_chr12:124887107	0.7608_x000D_ 0.2392	0.7436_x000D_ 0.2564	-0.0172_x000D_ 0.0172	NA_x000D_ NA	1_x000D_ 1	1.0_x000D_ 1.0	1.0_x000D_ 1.0	1.0_x000D_ 1.0	NA_x000D_ NA	NCOR2_exon_chr12:124810129	NCOR2_exon_chr12:124887107
TFRC	199.063	125.16	-0.6656	0.0111	DOWN	No	Yes	1	TFRC_exon_chr3:195779055	1	1	0	NA	5	0.9991	0.8271	-0.1721	Shortening	TFRC_exon_chr3:195779055
EBNA1BP2	1786.06	1141.58	-0.6449	0.0112	DOWN	No	No	2	EBNA1BP2_exon_chr1:43630164_x000D_ EBNA1BP2_exon_chr1:43630476	0.9202_x000D_ 0.0712	0.9161_x000D_ 0.0801	-0.004_x000D_ 0.0089	NA_x000D_ NA	4_x000D_ 1	0.4727_x000D_ 1.0	0.4555_x000D_ 1.0	-0.0172_x000D_ 1.0	NA_x000D_ NA	EBNA1BP2_exon_chr1:43630164	EBNA1BP2_exon_chr1:43630476
NAT8L	49.3621	16.0068	-1.608	0.0113	DOWN	No	Yes	1	NAT8L_exon_chr4:2065486	1	1	0	NA	3	NA	NA	NA	Shortening	NAT8L_exon_chr4:2065486
NTHL1	69.1931	35.6344	-0.9598	0.0115	DOWN	No	No	1	NTHL1_exon_chr16:2090048	1	1	0	NA	1	1	1	1	NA	NTHL1_exon_chr16:2090048
SSH1	267.088	150.925	-0.8263	0.0116	DOWN	No	No	1	SSH1_exon_chr12:109183020	1	1	0	NA	1	1	1	1	NA	SSH1_exon_chr12:109183020
RAB3GAP1	130.355	78.7524	-0.7331	0.0117	DOWN	No	Yes	1	RAB3GAP1_exon_chr2:135926114	1	1	0	NA	7	0.8616	0.4002	-0.4614	Shortening	RAB3GAP1_exon_chr2:135926114
RABL2B	93.4434	53.4308	-0.8105	0.0119	DOWN	No	No	1	RABL2B_exon_chr22:51207302	1	1	0	NA	1	1	1	1	NA	RABL2B_exon_chr22:51207302
GABPB1-IT1	21.2112	5.6105	-1.8995	0.0119	DOWN	No	No	1	GABPB1-IT1_exon_chr15:50647076	1	1	0	NA	1	1	1	1	NA	GABPB1-IT1_exon_chr15:50647076
PEX5	105.827	60.0223	-0.8146	0.012	DOWN	No	No	1	PEX5_exon_chr12:7362617	1	1	0	NA	1	1	1	1	NA	PEX5_exon_chr12:7362617
OSBPL5	27.747	8.3312	-1.7266	0.012	DOWN	No	Yes	1	OSBPL5_exon_chr11:3109573	1	1	0	NA	3	NA	NA	NA	Shortening	OSBPL5_exon_chr11:3109573
CIAO2A	177.326	108.201	-0.709	0.0125	DOWN	No	No	1	CIAO2A_exon_chr15:64367736	1	1	0	NA	1	1	1	1	NA	CIAO2A_exon_chr15:64367736
LOC100287015	11.2881	1.2213	-3.2102	0.0126	DOWN	No	No	1	LOC100287015_exon_chr8:6262641	1	1	0	NA	2	NA	NA	NA	NA	LOC100287015_exon_chr8:6262641
PCNP	254.297	165.106	-0.6261	0.0126	DOWN	No	Yes	1	PCNP_exon_chr3:101311470	1	1	0	NA	8	0.8566	0.3088	-0.5478	Shortening	PCNP_exon_chr3:101311470
ZNF12	42.9395	15.6031	-1.4826	0.0127	DOWN	No	Yes	1	ZNF12_exon_chr7:6732334	1	1	0	NA	2	NA	NA	NA	Shortening	ZNF12_exon_chr7:6732334
EMP2	66.1975	35.9374	-0.8866	0.013	DOWN	No	No	1	EMP2_exon_chr16:10626949	1	1	0	NA	2	0.2259	0.2049	-0.021	NA	EMP2_exon_chr16:10626949
VPS9D1-AS1	17.2985	3.4275	-2.3551	0.013	DOWN	No	No	1	VPS9D1-AS1_exon_chr16:89783751	1	1	0	NA	1	1	1	1	NA	VPS9D1-AS1_exon_chr16:89783751
SERPINF2	24.705	7.8737	-1.6796	0.0131	DOWN	No	No	1	SERPINF2_exon_chr17:1657415	1	1	0	NA	1	1	1	1	NA	SERPINF2_exon_chr17:1657415
ODR4	154.718	90.3612	-0.773	0.0131	DOWN	No	Yes	2	ODR4_exon_chr1:186368085_x000D_ ODR4_exon_chr1:186388140	0.0269_x000D_ 0.9731	0.0677_x000D_ 0.9323	0.0408_x000D_ -0.0408	NA_x000D_ NA	1_x000D_ 6	1.0_x000D_ 0.6739	1.0_x000D_ 0.49	1.0_x000D_ -0.1839	NA_x000D_ Both	ODR4_exon_chr1:186368085	ODR4_exon_chr1:186388140
DUSP6	435.107	269.509	-0.6959	0.0132	DOWN	No	No	1	DUSP6_exon_chr12:89743338	1	1	0	NA	5	0.7654	0.7306	-0.0348	NA	DUSP6_exon_chr12:89743338
CYP24A1	16.7727	4.7739	-1.8375	0.0136	DOWN	No	No	1	CYP24A1_exon_chr20:52771300	1	1	0	NA	2	NA	NA	NA	NA	CYP24A1_exon_chr20:52771300
PEX26	124.059	72.9394	-0.7544	0.0137	DOWN	No	No	1	PEX26_exon_chr22:18570737	1	1	0	NA	1	1	1	1	NA	PEX26_exon_chr22:18570737
API5	305.091	185.506	-0.7141	0.0137	DOWN	No	Yes	1	API5_exon_chr11:43363977	1	1	0	NA	4	0.9352	0.7327	-0.2026	Shortening	API5_exon_chr11:43363977
FCF1P2	9.7751	0.6483	-3.9891	0.014	DOWN	No	No	1	FCF1P2_exon_chr3:48333168	1	1	0	NA	2	NA	NA	NA	NA	FCF1P2_exon_chr3:48333168
MAGEF1	120.608	69.8471	-0.7866	0.0142	DOWN	No	Yes	1	MAGEF1_exon_chr3:184429852	1	1	0	NA	3	1	0.7638	-0.2362	Shortening	MAGEF1_exon_chr3:184429852
VSNL1	85.956	43.0063	-1.0016	0.0144	DOWN	Yes	Yes	2	VSNL1_exon_chr2:17721962_x000D_ VSNL1_exon_chr2:17836463	0.0856_x000D_ 0.9144	0.2333_x000D_ 0.7667	0.1477_x000D_ -0.1477	NA_x000D_ Down	5_x000D_ 1	0.6767_x000D_ 1.0	0.5079_x000D_ 1.0	-0.1688_x000D_ 1.0	Both_x000D_ NA	VSNL1_exon_chr2:17721962	VSNL1_exon_chr2:17836463
ZADH2	40.6219	19.3558	-1.0613	0.0144	DOWN	No	Yes	1	ZADH2_exon_chr18:72914295	1	1	0	NA	10	0.3881	0.2295	-0.1586	Both	ZADH2_exon_chr18:72914295
MFN2	143.998	85.9205	-0.7443	0.0146	DOWN	No	No	1	MFN2_exon_chr1:12071552	1	1	0	NA	1	1	1	1	NA	MFN2_exon_chr1:12071552
RAP1GAP2	95.8709	54.4654	-0.8135	0.0146	DOWN	No	No	1	RAP1GAP2_exon_chr17:2936685	1	1	0	NA	1	1	1	1	NA	RAP1GAP2_exon_chr17:2936685
PSMA3-AS1	60.6106	22.6226	-1.4513	0.0146	DOWN	Yes	Yes	2	PSMA3-AS1_exon_chr14:58734111_x000D_ PSMA3-AS1_exon_chr14:58740853	0.987_x000D_ 0.013	0.8353_x000D_ 0.1647	-0.1516_x000D_ 0.1516	Down_x000D_ NA	1_x000D_ 4	1.0_x000D_ 0.9446	1.0_x000D_ 0.7411	1.0_x000D_ -0.2035	NA_x000D_ Both	PSMA3-AS1_exon_chr14:58734111	PSMA3-AS1_exon_chr14:58740853
MRPL21	189.611	122.43	-0.6259	0.0147	DOWN	No	No	2	MRPL21_exon_chr11:68658863_x000D_ MRPL21_exon_chr11:68660461	0.771_x000D_ 0.229	0.8537_x000D_ 0.1463	0.0828_x000D_ -0.0828	NA_x000D_ NA	1_x000D_ 1	1.0_x000D_ 1.0	1.0_x000D_ 1.0	1.0_x000D_ 1.0	NA_x000D_ NA	MRPL21_exon_chr11:68658863	MRPL21_exon_chr11:68660461
ARHGEF17	19.7555	4.8099	-2.0464	0.0148	DOWN	No	No	1	ARHGEF17_exon_chr11:73078628	1	1	0	NA	1	1	1	1	NA	ARHGEF17_exon_chr11:73078628
EPOP	103.754	62.2156	-0.7404	0.0149	DOWN	No	Yes	1	EPOP_exon_chr17:36831210	1	1	0	NA	2	0.9398	0.7884	-0.1513	Shortening	EPOP_exon_chr17:36831210
SSU72	121.863	66.4075	-0.8752	0.0151	DOWN	No	No	1	SSU72_exon_chr1:1477547	1	1	0	NA	1	1	1	1	NA	SSU72_exon_chr1:1477547
SNHG7	356.922	234.702	-0.6044	0.0152	DOWN	No	No	1	SNHG7_exon_chr9:139621538	1	1	0	NA	3	0.5995	0.5614	-0.0382	NA	SNHG7_exon_chr9:139621538
ITPR3	158.518	96.0318	-0.7238	0.0152	DOWN	No	No	1	ITPR3_exon_chr6:33663488	1	1	0	NA	1	1	1	1	NA	ITPR3_exon_chr6:33663488
MIB2	97.5212	56.8703	-0.7805	0.0152	DOWN	No	No	2	MIB2_exon_chr1:1552457_x000D_ MIB2_exon_chr1:1565671	0.1345_x000D_ 0.8655	0.0738_x000D_ 0.9262	-0.0607_x000D_ 0.0607	NA_x000D_ NA	1_x000D_ 1	1.0_x000D_ 1.0	1.0_x000D_ 1.0	1.0_x000D_ 1.0	NA_x000D_ NA	MIB2_exon_chr1:1552457	MIB2_exon_chr1:1565671
TMEM191A	15.8941	2.9234	-2.4148	0.0152	DOWN	No	No	1	TMEM191A_exon_chr22:21058598	1	1	0	NA	1	1	1	1	NA	TMEM191A_exon_chr22:21058598
CTRL	12.5488	1.5747	-3.0327	0.0152	DOWN	No	No	1	CTRL_exon_chr16:67963998	1	1	0	NA	2	NA	NA	NA	NA	CTRL_exon_chr16:67963998
HBP1	44.8945	19.0298	-1.2632	0.0153	DOWN	No	No	1	HBP1_exon_chr7:106841858	1	1	0	NA	1	1	1	1	NA	HBP1_exon_chr7:106841858
AP1M2	56.0103	25.2301	-1.1644	0.0154	DOWN	No	No	1	AP1M2_exon_chr19:10683764	1	1	0	NA	1	1	1	1	NA	AP1M2_exon_chr19:10683764
RCOR1	50.6061	23.5912	-1.0945	0.0154	DOWN	No	Yes	1	RCOR1_exon_chr14:103192804	1	1	0	NA	4	0.9137	0.5429	-0.3708	Both	RCOR1_exon_chr14:103192804
SGTA	523.55	347.913	-0.5893	0.0156	DOWN	No	No	1	SGTA_exon_chr19:2755931	1	1	0	NA	1	1	1	1	NA	SGTA_exon_chr19:2755931
NPW	217.166	143.745	-0.5965	0.0157	DOWN	No	No	1	NPW_exon_chr16:2070533	1	1	0	NA	1	1	1	1	NA	NPW_exon_chr16:2070533
CDC42BPG	115.517	57.3443	-1.0251	0.0157	DOWN	No	No	1	CDC42BPG_exon_chr11:64592001	1	1	0	NA	4	0.0962	0.0554	-0.0408	NA	CDC42BPG_exon_chr11:64592001
CHUK	110.372	57.1428	-0.9442	0.0157	DOWN	No	Yes	1	CHUK_exon_chr10:101949384	1	1	0	NA	6	1	0.8123	-0.1877	Shortening	CHUK_exon_chr10:101949384
CUL7	35.4839	14.8056	-1.2763	0.0159	DOWN	No	No	2	CUL7_exon_chr6:43005749_x000D_ CUL7_exon_chr6:43022224	0.8329_x000D_ 0.1671	0.9099_x000D_ 0.0901	0.077_x000D_ -0.077	NA_x000D_ NA	1_x000D_ 1	1.0_x000D_ 1.0	1.0_x000D_ 1.0	1.0_x000D_ 1.0	NA_x000D_ NA	CUL7_exon_chr6:43005749	CUL7_exon_chr6:43022224
CMC1	149.03	92.18	-0.6874	0.0161	DOWN	No	No	1	CMC1_exon_chr3:28360999	1	1	0	NA	1	1	1	1	NA	CMC1_exon_chr3:28360999
MRPS23	379.992	235.095	-0.6876	0.0161	DOWN	No	No	1	MRPS23_exon_chr17:55917296	1	1	0	NA	4	0.806	0.7548	-0.0512	NA	MRPS23_exon_chr17:55917296
RABL2A	23.9585	7.1748	-1.7673	0.0161	DOWN	No	No	1	RABL2A_exon_chr2:114399607	1	1	0	NA	1	1	1	1	NA	RABL2A_exon_chr2:114399607
MARS2	29.2138	8.4562	-1.7774	0.0161	DOWN	No	No	1	MARS2_exon_chr2:198570092	1	1	0	NA	1	1	1	1	NA	MARS2_exon_chr2:198570092
FEM1B	79.7976	41.3314	-0.9457	0.0161	DOWN	No	Yes	1	FEM1B_exon_chr15:68581944	1	1	0	NA	6	0.774	0.4616	-0.3123	Shortening	FEM1B_exon_chr15:68581944
CDC45	50.4638	23.6368	-1.0807	0.0163	DOWN	No	No	1	CDC45_exon_chr22:19508003	1	1	0	NA	1	1	1	1	NA	CDC45_exon_chr22:19508003
TRPM2	130.883	73.3066	-0.8299	0.0164	DOWN	No	No	1	TRPM2_exon_chr21:45861574	1	1	0	NA	2	0.0538	0.0228	-0.031	NA	TRPM2_exon_chr21:45861574
PRXL2B	31.7688	10.7306	-1.5595	0.0164	DOWN	No	No	1	PRXL2B_exon_chr1:2520848	1	1	0	NA	1	1	1	1	NA	PRXL2B_exon_chr1:2520848
TLN2	19.6961	5.7026	-1.7739	0.0164	DOWN	No	Yes	2	TLN2_exon_chr15:62945360_x000D_ TLN2_exon_chr15:63132680	0.7091_x000D_ 0.2909	0.5937_x000D_ 0.4063	-0.1153_x000D_ 0.1153	Down_x000D_ NA	2_x000D_ 2	NA_x000D_ NA	NA_x000D_ NA	NA_x000D_ NA	Shortening_x000D_ NA	TLN2_exon_chr15:62945360	TLN2_exon_chr15:63132680
C16orf46	41.8733	17.1377	-1.3061	0.0166	DOWN	No	No	1	C16orf46_exon_chr16:81087699	1	1	0	NA	1	1	1	1	NA	C16orf46_exon_chr16:81087699
RRN3	159.133	97.2809	-0.7105	0.0166	DOWN	No	Yes	1	RRN3_exon_chr16:15155762	1	1	0	NA	7	0.7282	0.4763	-0.2519	Both	RRN3_exon_chr16:15155762
DNAJC16	97.4127	54.9102	-0.8262	0.0166	DOWN	No	Yes	1	DNAJC16_exon_chr1:15894272	1	1	0	NA	3	0.9817	0.7492	-0.2325	Shortening	DNAJC16_exon_chr1:15894272
NDFIP2	187.244	112.515	-0.7371	0.0169	DOWN	No	Yes	1	NDFIP2_exon_chr13:80126650	1	1	0	NA	8	0.8507	0.2625	-0.5881	Shortening	NDFIP2_exon_chr13:80126650
CDC14B	25.0893	8.8689	-1.4913	0.0171	DOWN	No	No	2	CDC14B_exon_chr9:99266071_x000D_ CDC14B_exon_chr9:99277231	1.0_x000D_ 0.0	0.5224_x000D_ 0.4776	-0.4776_x000D_ 0.4776	Down_x000D_ NA	1_x000D_ 1	1.0_x000D_ 1.0	1.0_x000D_ 1.0	1.0_x000D_ 1.0	NA_x000D_ NA	CDC14B_exon_chr9:99266071	CDC14B_exon_chr9:99277231
PRPS2	78.3422	42.5191	-0.8792	0.0172	DOWN	No	No	1	PRPS2_exon_chrX:12840822	1	1	0	NA	1	1	1	1	NA	PRPS2_exon_chrX:12840822
TAF9B	62.2565	30.5985	-1.0348	0.0173	DOWN	No	No	1	TAF9B_exon_chrX:77387270	1	1	0	NA	1	1	1	1	NA	TAF9B_exon_chrX:77387270
ARF6	299.272	190.327	-0.6487	0.0173	DOWN	No	Yes	1	ARF6_exon_chr14:50359973	1	1	0	NA	3	0.6174	0.1694	-0.448	Shortening	ARF6_exon_chr14:50359973
FAR2	17.4315	3.4861	-2.3438	0.0173	DOWN	No	Yes	1	FAR2_exon_chr12:29486564	1	1	0	NA	2	NA	NA	NA	Shortening	FAR2_exon_chr12:29486564
SPTLC2	126.554	77.1219	-0.7076	0.0175	DOWN	No	Yes	1	SPTLC2_exon_chr14:77978746	1	1	0	NA	4	0.8725	0.4037	-0.4688	Shortening	SPTLC2_exon_chr14:77978746
PRSS8	97.5231	52.7472	-0.895	0.0176	DOWN	No	No	1	PRSS8_exon_chr16:31143656	1	1	0	NA	1	1	1	1	NA	PRSS8_exon_chr16:31143656
MRPL39	183.974	116.688	-0.6577	0.0177	DOWN	No	No	1	MRPL39_exon_chr21:26958066	1	1	0	NA	1	1	1	1	NA	MRPL39_exon_chr21:26958066
MVD	149.597	88.1399	-0.7654	0.0177	DOWN	No	No	1	MVD_exon_chr16:88719013	1	1	0	NA	1	1	1	1	NA	MVD_exon_chr16:88719013
ANGEL2	25.2514	7.9361	-1.6365	0.0177	DOWN	No	No	1	ANGEL2_exon_chr1:213168534	1	1	0	NA	2	NA	NA	NA	NA	ANGEL2_exon_chr1:213168534
PPIE	110.371	62.055	-0.8266	0.018	DOWN	No	No	2	PPIE_exon_chr1:40218958_x000D_ PPIE_exon_chr1:40229360	0.695_x000D_ 0.305	0.79_x000D_ 0.21	0.095_x000D_ -0.095	NA_x000D_ NA	1_x000D_ 3	1.0_x000D_ 0.1455	1.0_x000D_ 0.0454	1.0_x000D_ -0.1001	NA_x000D_ NA	PPIE_exon_chr1:40218958	PPIE_exon_chr1:40229360
TMEM243	42.3447	16.7579	-1.3478	0.018	DOWN	No	No	1	TMEM243_exon_chr7:86826074	1	1	0	NA	1	1	1	1	NA	TMEM243_exon_chr7:86826074
ESRP1	176.867	113.686	-0.6397	0.018	DOWN	No	Yes	1	ESRP1_exon_chr8:95718152	1	1	0	NA	2	0.7394	0.298	-0.4414	Shortening	ESRP1_exon_chr8:95718152
NEIL3	59.5584	27.7431	-1.1037	0.018	DOWN	No	Yes	1	NEIL3_exon_chr4:178283442	1	1	0	NA	4	0.9028	0.7536	-0.1492	Shortening	NEIL3_exon_chr4:178283442
FBXO38	48.0003	19.2839	-1.334	0.018	DOWN	No	Yes	1	FBXO38_exon_chr5:147821531	1	1	0	NA	2	NA	NA	NA	Shortening	FBXO38_exon_chr5:147821531
IRF2BPL	123.371	71.0749	-0.7996	0.0182	DOWN	No	No	1	IRF2BPL_exon_chr14:77495051	1	1	0	NA	1	1	1	1	NA	IRF2BPL_exon_chr14:77495051
SLC6A8	470.778	311.625	-0.5959	0.0185	DOWN	No	Yes	1	SLC6A8_exon_chrX:152960528	1	1	0	NA	3	0.6283	0.3775	-0.2508	Shortening	SLC6A8_exon_chrX:152960528
CCDC57	104.613	60.3915	-0.7927	0.0186	DOWN	No	No	2	CCDC57_exon_chr17:80059742_x000D_ CCDC57_exon_chr17:80115824	0.9579_x000D_ 0.0421	0.9847_x000D_ 0.0153	0.0268_x000D_ -0.0268	NA_x000D_ NA	1_x000D_ 1	1.0_x000D_ 1.0	1.0_x000D_ 1.0	1.0_x000D_ 1.0	NA_x000D_ NA	CCDC57_exon_chr17:80059742	CCDC57_exon_chr17:80115824
PTH2	9.7905	0	-5.8628	0.0189	DOWN	No	No	1	PTH2_exon_chr19:49925899	1	1	0	NA	1	1	1	1	NA	PTH2_exon_chr19:49925899
NOP9	252.423	152.469	-0.724	0.0193	DOWN	No	Yes	1	NOP9_exon_chr14:24774143	1	1	0	NA	3	0.9581	0.8368	-0.1213	Shortening	NOP9_exon_chr14:24774143
LFNG	53.9594	23.1296	-1.2241	0.0194	DOWN	No	No	1	LFNG_exon_chr7:2566707	1	1	0	NA	1	1	1	1	NA	LFNG_exon_chr7:2566707
COX11	124.867	72.5174	-0.7844	0.0197	DOWN	No	No	2	COX11_exon_chr17:53029473_x000D_ COX11_exon_chr17:53040792	0.0868_x000D_ 0.9132	0.1546_x000D_ 0.8454	0.0677_x000D_ -0.0677	NA_x000D_ NA	1_x000D_ 8	1.0_x000D_ 0.1369	1.0_x000D_ 0.2249	1.0_x000D_ 0.088	NA_x000D_ NA	COX11_exon_chr17:53029473	COX11_exon_chr17:53040792
ALDH6A1	25.0261	7.5868	-1.7527	0.0197	DOWN	No	No	1	ALDH6A1_exon_chr14:74527449	1	1	0	NA	2	NA	NA	NA	NA	ALDH6A1_exon_chr14:74527449
ISCU	354.108	225.872	-0.649	0.0197	DOWN	No	Yes	1	ISCU_exon_chr12:108961433	1	1	0	NA	3	0.8791	0.586	-0.2931	Shortening	ISCU_exon_chr12:108961433
TRNT1	54.463	20.4417	-1.4186	0.0198	DOWN	No	Yes	3	TRNT1_exon_chr3:3189133_x000D_ TRNT1_exon_chr3:3189589_x000D_ TRNT1_exon_chr3:3192223	0.0534_x000D_ 0.6244_x000D_ 0.3222	0.0882_x000D_ 0.7056_x000D_ 0.1356	0.0348_x000D_ 0.0812_x000D_ -0.1866	NA_x000D_ NA_x000D_ Down	5_x000D_ 1_x000D_ 2	0.8006_x000D_ 1.0_x000D_ NA	0.5872_x000D_ 1.0_x000D_ NA	-0.2135_x000D_ 1.0_x000D_ NA	Both_x000D_ NA_x000D_ NA	TRNT1_exon_chr3:3189133	TRNT1_exon_chr3:3189589	TRNT1_exon_chr3:3192223
IRAK1	138.293	88.7123	-0.6329	0.0199	DOWN	No	No	1	IRAK1_exon_chrX:153277368	1	1	0	NA	2	0.8439	0.7927	-0.0512	NA	IRAK1_exon_chrX:153277368
FAM86JP	26.5465	7.5202	-1.8265	0.02	DOWN	No	No	1	FAM86JP_exon_chr3:125647337	1	1	0	NA	1	1	1	1	NA	FAM86JP_exon_chr3:125647337
IDI1	150.953	51.9265	-1.5359	0.02	DOWN	No	Yes	1	IDI1_exon_chr10:1087444	1	1	0	NA	6	0.9333	0.8257	-0.1075	Shortening	IDI1_exon_chr10:1087444
HDHD5	142.273	85.6523	-0.7355	0.0201	DOWN	No	No	1	HDHD5_exon_chr22:17619247	1	1	0	NA	1	1	1	1	NA	HDHD5_exon_chr22:17619247
TBC1D9B	131.567	79.4066	-0.7218	0.0201	DOWN	No	Yes	1	TBC1D9B_exon_chr5:179291128	1	1	0	NA	3	0.679	0.3711	-0.3079	Shortening	TBC1D9B_exon_chr5:179291128
DPH5	55.0413	25.1185	-1.1204	0.0201	DOWN	No	Yes	1	DPH5_exon_chr1:101456187	1	1	0	NA	2	0.2467	0.1089	-0.1378	Shortening	DPH5_exon_chr1:101456187
EXOC8	46.7091	19.1067	-1.2947	0.0201	DOWN	No	Yes	1	EXOC8_exon_chr1:231473598	1	1	0	NA	3	NA	NA	NA	Shortening	EXOC8_exon_chr1:231473598
NT5DC3	73.6888	40.1961	-0.88	0.0203	DOWN	No	No	1	NT5DC3_exon_chr12:104171859	1	1	0	NA	1	1	1	1	NA	NT5DC3_exon_chr12:104171859
NLE1	83.6721	46.058	-0.8594	0.0203	DOWN	No	Yes	1	NLE1_exon_chr17:33459468	1	1	0	NA	3	0.2538	0.1061	-0.1477	Shortening	NLE1_exon_chr17:33459468
DIMT1	70.8852	31.8527	-1.1569	0.0203	DOWN	No	Yes	1	DIMT1_exon_chr5:61684879	1	1	0	NA	4	0.1933	0.0691	-0.1242	Both	DIMT1_exon_chr5:61684879
ZDHHC23	14.0991	2.752	-2.4587	0.0204	DOWN	No	No	1	ZDHHC23_exon_chr3:113677209	1	1	0	NA	1	1	1	1	NA	ZDHHC23_exon_chr3:113677209
ALKBH2	70.5671	35.4524	-0.9926	0.0205	DOWN	No	No	1	ALKBH2_exon_chr12:109526317	1	1	0	NA	1	1	1	1	NA	ALKBH2_exon_chr12:109526317
THEM6	84.7378	36.1634	-1.231	0.0205	DOWN	No	No	2	THEM6_exon_chr8:143810378_x000D_ THEM6_exon_chr8:143816743	0.1851_x000D_ 0.8149	0.1437_x000D_ 0.8563	-0.0415_x000D_ 0.0415	NA_x000D_ NA	1_x000D_ 1	1.0_x000D_ 1.0	1.0_x000D_ 1.0	1.0_x000D_ 1.0	NA_x000D_ NA	THEM6_exon_chr8:143810378	THEM6_exon_chr8:143816743
LTV1	227.74	140.135	-0.6993	0.0205	DOWN	No	Yes	3	LTV1_exon_chr6:144165622_x000D_ LTV1_exon_chr6:144184222_x000D_ LTV1_exon_chr6:144184553	0.1071_x000D_ 0.1301_x000D_ 0.7628	0.0914_x000D_ 0.0766_x000D_ 0.8321	-0.0157_x000D_ -0.0535_x000D_ 0.0692	NA_x000D_ NA_x000D_ NA	2_x000D_ 1_x000D_ 2	0.4388_x000D_ 1.0_x000D_ NA	0.3857_x000D_ 1.0_x000D_ NA	-0.0532_x000D_ 1.0_x000D_ NA	NA_x000D_ NA_x000D_ Shortening	LTV1_exon_chr6:144165622	LTV1_exon_chr6:144184222	LTV1_exon_chr6:144184553
KREMEN2	41.5225	19.2582	-1.1373	0.0206	DOWN	No	No	1	KREMEN2_exon_chr16:3017810	1	1	0	NA	1	1	1	1	NA	KREMEN2_exon_chr16:3017810
SS18L2	46.2387	20.5851	-1.1729	0.0206	DOWN	No	No	1	SS18L2_exon_chr3:42635913	1	1	0	NA	1	1	1	1	NA	SS18L2_exon_chr3:42635913
CITED4	48.2014	18.3253	-1.4159	0.021	DOWN	No	No	1	CITED4_exon_chr1:41328035	1	1	0	NA	1	1	1	1	NA	CITED4_exon_chr1:41328035
LINC00205	12.4518	1.3552	-3.2942	0.021	DOWN	No	No	1	LINC00205_exon_chr21:46710385	1	1	0	NA	3	NA	NA	NA	NA	LINC00205_exon_chr21:46710385
RFLNB	98.4319	56.202	-0.8073	0.0212	DOWN	No	Yes	1	RFLNB_exon_chr17:293285	1	1	0	NA	5	0.9895	0.8529	-0.1366	Shortening	RFLNB_exon_chr17:293285
VASH2	16.2016	3.4796	-2.179	0.0214	DOWN	No	No	1	VASH2_exon_chr1:213161853	1	1	0	NA	1	1	1	1	NA	VASH2_exon_chr1:213161853
KLHL21	182.865	95.9997	-0.9264	0.0218	DOWN	No	No	1	KLHL21_exon_chr1:6654170	1	1	0	NA	1	1	1	1	NA	KLHL21_exon_chr1:6654170
SMARCA1	213.699	122.1	-0.8146	0.0218	DOWN	No	Yes	4	SMARCA1_exon_chrX:128581278_x000D_ SMARCA1_exon_chrX:128582420_x000D_ SMARCA1_exon_chrX:128605303_x000D_ SMARCA1_exon_chrX:128621114	0.5703_x000D_ 0.0994_x000D_ 0.1573_x000D_ 0.0988	0.5366_x000D_ 0.1651_x000D_ 0.1544_x000D_ 0.1219	-0.0337_x000D_ 0.0657_x000D_ -0.0029_x000D_ 0.0231	NA_x000D_ NA_x000D_ NA_x000D_ NA	1_x000D_ 1_x000D_ 1_x000D_ 3	1.0_x000D_ 1.0_x000D_ 1.0_x000D_ 0.307	1.0_x000D_ 1.0_x000D_ 1.0_x000D_ 0.1342	1.0_x000D_ 1.0_x000D_ 1.0_x000D_ -0.1728	NA_x000D_ NA_x000D_ NA_x000D_ Shortening	SMARCA1_exon_chrX:128581278	SMARCA1_exon_chrX:128582420	SMARCA1_exon_chrX:128605303	SMARCA1_exon_chrX:128621114
NCLN	258.138	164.376	-0.6509	0.022	DOWN	No	No	1	NCLN_exon_chr19:3207626	1	1	0	NA	4	0.8383	0.784	-0.0543	NA	NCLN_exon_chr19:3207626
RIOX2	128.177	72.426	-0.8206	0.022	DOWN	No	Yes	1	RIOX2_exon_chr3:97664186	1	1	0	NA	7	0.3904	0.2453	-0.145	Both	RIOX2_exon_chr3:97664186
UTP14A	185.98	121.988	-0.6048	0.0222	DOWN	No	No	3	UTP14A_exon_chrX:129053370_x000D_ UTP14A_exon_chrX:129054432_x000D_ UTP14A_exon_chrX:129063311	0.1199_x000D_ 0.5843_x000D_ 0.2958	0.1229_x000D_ 0.5098_x000D_ 0.3673	0.003_x000D_ -0.0744_x000D_ 0.0714	NA_x000D_ NA_x000D_ NA	1_x000D_ 2_x000D_ 1	1.0_x000D_ 0.9188_x000D_ 1.0	1.0_x000D_ 0.8683_x000D_ 1.0	1.0_x000D_ -0.0505_x000D_ 1.0	NA_x000D_ NA_x000D_ NA	UTP14A_exon_chrX:129053370	UTP14A_exon_chrX:129054432	UTP14A_exon_chrX:129063311
ZNF251	80.5966	44.1173	-0.8854	0.0223	DOWN	No	No	1	ZNF251_exon_chr8:145948767	1	1	0	NA	3	0.8918	0.9602	0.0685	NA	ZNF251_exon_chr8:145948767
FAM122C	16.6681	3.9083	-2.0704	0.0223	DOWN	No	No	2	FAM122C_exon_chrX:133943216_x000D_ FAM122C_exon_chrX:133988120	0.9469_x000D_ 0.0531	0.9116_x000D_ 0.0884	-0.0353_x000D_ 0.0353	NA_x000D_ NA	1_x000D_ 2	1.0_x000D_ NA	1.0_x000D_ NA	1.0_x000D_ NA	NA_x000D_ NA	FAM122C_exon_chrX:133943216	FAM122C_exon_chrX:133988120
SMARCD1	172.295	109.248	-0.6565	0.0224	DOWN	No	No	2	SMARCD1_exon_chr12:50479943_x000D_ SMARCD1_exon_chr12:50492729	0.604_x000D_ 0.396	0.5253_x000D_ 0.4747	-0.0787_x000D_ 0.0787	NA_x000D_ NA	1_x000D_ 3	1.0_x000D_ 0.0995	1.0_x000D_ 0.082	1.0_x000D_ -0.0175	NA_x000D_ NA	SMARCD1_exon_chr12:50479943	SMARCD1_exon_chr12:50492729
PAX8-AS1	78.7627	43.02	-0.8841	0.0224	DOWN	Yes	No	3	PAX8-AS1_exon_chr2:113996665_x000D_ PAX8-AS1_exon_chr2:114012966_x000D_ PAX8-AS1_exon_chr2:114023052	0.6614_x000D_ 0.1589_x000D_ 0.1796	0.3661_x000D_ 0.3905_x000D_ 0.2434	-0.2953_x000D_ 0.2316_x000D_ 0.0637	Down_x000D_ NA_x000D_ NA	1_x000D_ 1_x000D_ 2	1.0_x000D_ 1.0_x000D_ NA	1.0_x000D_ 1.0_x000D_ NA	1.0_x000D_ 1.0_x000D_ NA	NA_x000D_ NA_x000D_ NA	PAX8-AS1_exon_chr2:113996665	PAX8-AS1_exon_chr2:114012966	PAX8-AS1_exon_chr2:114023052
NSUN2	196.921	124.218	-0.6597	0.0225	DOWN	No	No	1	NSUN2_exon_chr5:6600345	1	1	0	NA	1	1	1	1	NA	NSUN2_exon_chr5:6600345
MSANTD3-TMEFF1	21.1142	5.0359	-2.0904	0.0226	DOWN	No	No	1	MSANTD3-TMEFF1_exon_chr9:103338797	1	1	0	NA	1	1	1	1	NA	MSANTD3-TMEFF1_exon_chr9:103338797
DTD2	36.4609	16.6232	-1.1569	0.0228	DOWN	No	Yes	1	DTD2_exon_chr14:31917660	1	1	0	NA	2	0.8229	0.5605	-0.2624	Shortening	DTD2_exon_chr14:31917660
IFT52	77.2704	41.7122	-0.8982	0.023	DOWN	No	No	1	IFT52_exon_chr20:42275575	1	1	0	NA	1	1	1	1	NA	IFT52_exon_chr20:42275575
SCAF8	59.1661	30.8582	-0.9421	0.0232	DOWN	No	No	1	SCAF8_exon_chr6:155153072	1	1	0	NA	1	1	1	1	NA	SCAF8_exon_chr6:155153072
LARGE2	82.5845	35.5736	-1.2248	0.0232	DOWN	No	No	1	LARGE2_exon_chr11:45950180	1	1	0	NA	1	1	1	1	NA	LARGE2_exon_chr11:45950180
SH2D3A	133.98	81.4985	-0.7146	0.0236	DOWN	No	No	1	SH2D3A_exon_chr19:6752764	1	1	0	NA	1	1	1	1	NA	SH2D3A_exon_chr19:6752764
LOC107985246	13.5394	2.8714	-2.2905	0.0236	DOWN	No	No	1	LOC107985246_exon_chr1:201502551	1	1	0	NA	2	NA	NA	NA	NA	LOC107985246_exon_chr1:201502551
RAB11B	88.9129	51.4778	-0.7937	0.0237	DOWN	No	Yes	1	RAB11B_exon_chr19:8468296	1	1	0	NA	3	0.5383	0.4909	-0.0474	Both	RAB11B_exon_chr19:8468296
TPCN1	42.4024	18.8934	-1.156	0.0238	DOWN	No	Yes	1	TPCN1_exon_chr12:113733764	1	1	0	NA	2	0.9578	0.797	-0.1608	Shortening	TPCN1_exon_chr12:113733764
MND1	120.287	69.0788	-0.8024	0.0243	DOWN	No	No	2	MND1_exon_chr4:154318370_x000D_ MND1_exon_chr4:154335902	0.0863_x000D_ 0.9137	0.1003_x000D_ 0.8997	0.014_x000D_ -0.014	NA_x000D_ NA	1_x000D_ 3	1.0_x000D_ 0.0314	1.0_x000D_ 0.0303	1.0_x000D_ -0.0011	NA_x000D_ NA	MND1_exon_chr4:154318370	MND1_exon_chr4:154335902
PHRF1	83.9966	45.0891	-0.8954	0.0243	DOWN	No	No	2	PHRF1_exon_chr11:601573_x000D_ PHRF1_exon_chr11:611633	0.1074_x000D_ 0.8926	0.1778_x000D_ 0.8222	0.0704_x000D_ -0.0704	NA_x000D_ NA	1_x000D_ 4	1.0_x000D_ 0.0872	1.0_x000D_ 0.1101	1.0_x000D_ 0.0228	NA_x000D_ NA	PHRF1_exon_chr11:601573	PHRF1_exon_chr11:611633
C12orf76	12.4922	1.945	-2.736	0.0243	DOWN	No	No	1	C12orf76_exon_chr12:110480264	1	1	0	NA	1	1	1	1	NA	C12orf76_exon_chr12:110480264
ZNRF3	31.502	9.756	-1.663	0.0245	DOWN	No	Yes	1	ZNRF3_exon_chr22:29449566	1	1	0	NA	4	NA	NA	NA	Shortening	ZNRF3_exon_chr22:29449566
TPTEP2-CSNK1E	119.788	74.1467	-0.686	0.0246	DOWN	No	Yes	1	TPTEP2-CSNK1E_exon_chr22:38687944	1	1	0	NA	3	0.931	0.7746	-0.1564	Shortening	TPTEP2-CSNK1E_exon_chr22:38687944
ARMT1	65.6395	31.2471	-1.0829	0.0248	DOWN	No	No	1	ARMT1_exon_chr6:151789477	1	1	0	NA	1	1	1	1	NA	ARMT1_exon_chr6:151789477
BRCA1	73.655	35.8822	-1.0421	0.0254	DOWN	No	No	1	BRCA1_exon_chr17:41197819	1	1	0	NA	1	1	1	1	NA	BRCA1_exon_chr17:41197819
UPRT	17.1961	3.1054	-2.5624	0.0254	DOWN	No	No	1	UPRT_exon_chrX:74523239	1	1	0	NA	1	1	1	1	NA	UPRT_exon_chrX:74523239
ZNF248	45.9409	20.9554	-1.1359	0.0259	DOWN	No	No	1	ZNF248_exon_chr10:38122044	1	1	0	NA	1	1	1	1	NA	ZNF248_exon_chr10:38122044
CMBL	424.192	280.573	-0.6	0.026	DOWN	No	No	1	CMBL_exon_chr5:10280744	1	1	0	NA	6	0.891	0.878	-0.0129	NA	CMBL_exon_chr5:10280744
ANKRD42	19.6769	5.088	-1.9232	0.026	DOWN	No	Yes	2	ANKRD42_exon_chr11:82923694_x000D_ ANKRD42_exon_chr11:82966886	0.9232_x000D_ 0.0768	1.0_x000D_ 0.0	0.0768_x000D_ -0.0768	NA_x000D_ NA	1_x000D_ 3	1.0_x000D_ NA	1.0_x000D_ NA	1.0_x000D_ NA	NA_x000D_ Shortening	ANKRD42_exon_chr11:82923694	ANKRD42_exon_chr11:82966886
DTNA	14.1562	2.5011	-2.5343	0.0262	DOWN	No	No	3	DTNA_exon_chr18:32409004_x000D_ DTNA_exon_chr18:32446074_x000D_ DTNA_exon_chr18:32467729	0.1138_x000D_ 0.1572_x000D_ 0.729	0.1395_x000D_ 0.0_x000D_ 0.8605	0.0257_x000D_ -0.1572_x000D_ 0.1315	NA_x000D_ NA_x000D_ NA	1_x000D_ 1_x000D_ 1	1.0_x000D_ 1.0_x000D_ 1.0	1.0_x000D_ 1.0_x000D_ 1.0	1.0_x000D_ 1.0_x000D_ 1.0	NA_x000D_ NA_x000D_ NA	DTNA_exon_chr18:32409004	DTNA_exon_chr18:32446074	DTNA_exon_chr18:32467729
TRIM5	67.2623	32.3663	-1.0619	0.0262	DOWN	No	Yes	1	TRIM5_exon_chr11:5686912	1	1	0	NA	3	0.9858	0.7554	-0.2304	Shortening	TRIM5_exon_chr11:5686912
PHF14	53.3157	26.1084	-1.0348	0.0264	DOWN	No	No	3	PHF14_exon_chr7:11076611_x000D_ PHF14_exon_chr7:11101417_x000D_ PHF14_exon_chr7:11209042	0.5355_x000D_ 0.1988_x000D_ 0.2657	0.6903_x000D_ 0.1545_x000D_ 0.1552	0.1548_x000D_ -0.0443_x000D_ -0.1104	NA_x000D_ NA_x000D_ NA	1_x000D_ 1_x000D_ 1	1.0_x000D_ 1.0_x000D_ 1.0	1.0_x000D_ 1.0_x000D_ 1.0	1.0_x000D_ 1.0_x000D_ 1.0	NA_x000D_ NA_x000D_ NA	PHF14_exon_chr7:11076611	PHF14_exon_chr7:11101417	PHF14_exon_chr7:11209042
FCHO1	73.8869	40.3089	-0.8787	0.0268	DOWN	No	No	1	FCHO1_exon_chr19:17899078	1	1	0	NA	1	1	1	1	NA	FCHO1_exon_chr19:17899078
COASY	133.177	86.0416	-0.6371	0.0269	DOWN	No	No	1	COASY_exon_chr17:40717923	1	1	0	NA	1	1	1	1	NA	COASY_exon_chr17:40717923
BAP1	68.7714	39.3688	-0.807	0.0269	DOWN	No	No	1	BAP1_exon_chr3:52436437	1	1	0	NA	1	1	1	1	NA	BAP1_exon_chr3:52436437
UBALD1	89.0118	49.8526	-0.8374	0.0269	DOWN	No	No	1	UBALD1_exon_chr16:4659984	1	1	0	NA	1	1	1	1	NA	UBALD1_exon_chr16:4659984
CAPN12	26.9673	9.7008	-1.4982	0.027	DOWN	No	No	1	CAPN12_exon_chr19:39221518	1	1	0	NA	1	1	1	1	NA	CAPN12_exon_chr19:39221518
IFT80	48.1292	18.0978	-1.4238	0.027	DOWN	No	Yes	1	IFT80_exon_chr3:159976423	1	1	0	NA	6	0.5625	0.3082	-0.2544	Shortening	IFT80_exon_chr3:159976423
ARHGAP8	69.2959	36.7628	-0.9234	0.0271	DOWN	No	No	1	ARHGAP8_exon_chr22:45258154	1	1	0	NA	2	0.0254	0.047	0.0216	NA	ARHGAP8_exon_chr22:45258154
EIF3B	842.533	518.134	-0.7016	0.0274	DOWN	No	No	1	EIF3B_exon_chr7:2419838	1	1	0	NA	1	1	1	1	NA	EIF3B_exon_chr7:2419838
HSPA12A	43.4118	17.8927	-1.3062	0.0274	DOWN	No	Yes	1	HSPA12A_exon_chr10:118434929	1	1	0	NA	2	0.8467	0.3418	-0.5048	Shortening	HSPA12A_exon_chr10:118434929
CACHD1	22.3442	6.2989	-1.8422	0.0277	DOWN	No	Yes	1	CACHD1_exon_chr1:65157005	1	1	0	NA	2	NA	NA	NA	Shortening	CACHD1_exon_chr1:65157005
SMYD2	84.0007	48.6641	-0.7973	0.0281	DOWN	No	No	1	SMYD2_exon_chr1:214510046	1	1	0	NA	1	1	1	1	NA	SMYD2_exon_chr1:214510046
NXN	158.351	102.81	-0.6248	0.0286	DOWN	No	No	1	NXN_exon_chr17:704371	1	1	0	NA	2	0.9518	0.8898	-0.062	NA	NXN_exon_chr17:704371
SCO1	92.2937	50.3047	-0.8806	0.0286	DOWN	No	Yes	1	SCO1_exon_chr17:10584570	1	1	0	NA	4	0.1486	0.0796	-0.069	Both	SCO1_exon_chr17:10584570
ZNF655	69.8989	37.2099	-0.9022	0.0286	DOWN	Yes	Yes	2	ZNF655_exon_chr7:99161485_x000D_ ZNF655_exon_chr7:99169867	0.6843_x000D_ 0.3157	0.4096_x000D_ 0.5904	-0.2747_x000D_ 0.2747	Down_x000D_ NA	3_x000D_ 1	0.996_x000D_ 1.0	0.844_x000D_ 1.0	-0.1521_x000D_ 1.0	Shortening_x000D_ NA	ZNF655_exon_chr7:99161485	ZNF655_exon_chr7:99169867
PTGR2	31.0523	11.834	-1.3931	0.0291	DOWN	No	Yes	1	PTGR2_exon_chr14:74350803	1	1	0	NA	3	NA	NA	NA	Shortening	PTGR2_exon_chr14:74350803
GDAP1	86.2749	45.4417	-0.9103	0.0292	DOWN	No	Yes	2	GDAP1_exon_chr8:75276219_x000D_ GDAP1_exon_chr8:75400912	0.9794_x000D_ 0.0206	0.8934_x000D_ 0.1066	-0.086_x000D_ 0.086	NA_x000D_ NA	1_x000D_ 4	1.0_x000D_ 0.7659	1.0_x000D_ 0.5163	1.0_x000D_ -0.2496	NA_x000D_ Shortening	GDAP1_exon_chr8:75276219	GDAP1_exon_chr8:75400912
CMTM7	225.63	141.994	-0.672	0.0293	DOWN	No	No	1	CMTM7_exon_chr3:32495732	1	1	0	NA	1	1	1	1	NA	CMTM7_exon_chr3:32495732
FBXO2	255.029	166.769	-0.6163	0.0294	DOWN	No	No	1	FBXO2_exon_chr1:11708885	1	1	0	NA	1	1	1	1	NA	FBXO2_exon_chr1:11708885
TRIM65	78.6106	44.8897	-0.8132	0.0294	DOWN	No	No	1	TRIM65_exon_chr17:73887428	1	1	0	NA	1	1	1	1	NA	TRIM65_exon_chr17:73887428
ADM	153.643	85.4213	-0.8503	0.0294	DOWN	No	No	1	ADM_exon_chr11:10327878	1	1	0	NA	1	1	1	1	NA	ADM_exon_chr11:10327878
UBA2	254.301	168.717	-0.5926	0.03	DOWN	No	No	1	UBA2_exon_chr19:34959944	1	1	0	NA	4	0.8157	0.8574	0.0417	NA	UBA2_exon_chr19:34959944
IER3	2563.98	1623.22	-0.66	0.03	DOWN	No	No	1	IER3_exon_chr6:30711973	1	1	0	NA	1	1	1	1	NA	IER3_exon_chr6:30711973
OTUD6B	101.311	31.7393	-1.6851	0.0302	DOWN	Yes	No	2	OTUD6B_exon_chr8:92086058_x000D_ OTUD6B_exon_chr8:92097011	0.2704_x000D_ 0.7296	0.539_x000D_ 0.461	0.2686_x000D_ -0.2686	NA_x000D_ Down	1_x000D_ 1	1.0_x000D_ 1.0	1.0_x000D_ 1.0	1.0_x000D_ 1.0	NA_x000D_ NA	OTUD6B_exon_chr8:92086058	OTUD6B_exon_chr8:92097011
TNFRSF25	53.3825	26.7598	-0.9942	0.0308	DOWN	No	No	1	TNFRSF25_exon_chr1:6521822	1	1	0	NA	1	1	1	1	NA	TNFRSF25_exon_chr1:6521822
TRAPPC6B	141.693	86.4678	-0.7061	0.0312	DOWN	Yes	Yes	2	TRAPPC6B_exon_chr14:39619585_x000D_ TRAPPC6B_exon_chr14:39621043	0.9969_x000D_ 0.0031	0.8284_x000D_ 0.1716	-0.1685_x000D_ 0.1685	Down_x000D_ Up	1_x000D_ 7	1.0_x000D_ 1.0	1.0_x000D_ 0.7593	1.0_x000D_ -0.2407	NA_x000D_ Shortening	TRAPPC6B_exon_chr14:39619585	TRAPPC6B_exon_chr14:39621043
CLK3	72.5352	39.8714	-0.8707	0.0315	DOWN	No	No	1	CLK3_exon_chr15:74922047	1	1	0	NA	2	0.0564	0.0846	0.0281	NA	CLK3_exon_chr15:74922047
FN3KRP	75.4841	37.997	-0.9956	0.0315	DOWN	No	No	1	FN3KRP_exon_chr17:80684708	1	1	0	NA	1	1	1	1	NA	FN3KRP_exon_chr17:80684708
ASB13	34.4199	14.8416	-1.1978	0.0316	DOWN	No	No	1	ASB13_exon_chr10:5682793	1	1	0	NA	2	0.9337	0.9269	-0.0068	NA	ASB13_exon_chr10:5682793
DANCR	155.587	101.164	-0.6244	0.032	DOWN	No	No	1	DANCR_exon_chr4:53579415	1	1	0	NA	1	1	1	1	NA	DANCR_exon_chr4:53579415
EPHA1	84.579	43.9705	-0.9502	0.032	DOWN	No	No	1	EPHA1_exon_chr7:143088628	1	1	0	NA	2	0.9246	0.9317	0.0071	NA	EPHA1_exon_chr7:143088628
NUDCD3	99.4331	58.9735	-0.7673	0.0321	DOWN	No	No	2	NUDCD3_exon_chr7:44425720_x000D_ NUDCD3_exon_chr7:44524883	0.4823_x000D_ 0.5177	0.4606_x000D_ 0.5394	-0.0217_x000D_ 0.0217	NA_x000D_ NA	1_x000D_ 2	1.0_x000D_ 0.9389	1.0_x000D_ 0.9138	1.0_x000D_ -0.0251	NA_x000D_ NA	NUDCD3_exon_chr7:44425720	NUDCD3_exon_chr7:44524883
RNF43	99.2111	57.6415	-0.7981	0.0322	DOWN	No	No	1	RNF43_exon_chr17:56432347	1	1	0	NA	3	0.1576	0.18	0.0223	NA	RNF43_exon_chr17:56432347
LRRC23	59.1029	31.5472	-0.8937	0.0327	DOWN	No	No	1	LRRC23_exon_chr12:7023054	1	1	0	NA	1	1	1	1	NA	LRRC23_exon_chr12:7023054
SEMA4D	38.7224	16.9885	-1.1886	0.0327	DOWN	No	Yes	1	SEMA4D_exon_chr9:91994544	1	1	0	NA	2	0.8768	0.7052	-0.1716	Shortening	SEMA4D_exon_chr9:91994544
CCSAP	111.03	72.8899	-0.6079	0.0334	DOWN	No	Yes	1	CCSAP_exon_chr1:229461158	1	1	0	NA	4	0.9363	0.5824	-0.3539	Both	CCSAP_exon_chr1:229461158
TIMM21	118.964	70.0161	-0.7545	0.0342	DOWN	No	Yes	1	TIMM21_exon_chr18:71825610	1	1	0	NA	3	0.2163	0.0543	-0.162	Shortening	TIMM21_exon_chr18:71825610
KLK7	102.394	59.8426	-0.7692	0.0342	DOWN	No	Yes	1	KLK7_exon_chr19:51480947	1	1	0	NA	6	0.4715	0.3959	-0.0756	Both	KLK7_exon_chr19:51480947
KIAA0040	52.5715	26.3478	-0.9929	0.0343	DOWN	No	No	1	KIAA0040_exon_chr1:175130282	1	1	0	NA	4	0.1431	0.1123	-0.0308	NA	KIAA0040_exon_chr1:175130282
NOP16	392.595	238.512	-0.7149	0.0351	DOWN	No	No	1	NOP16_exon_chr5:175811375	1	1	0	NA	1	1	1	1	NA	NOP16_exon_chr5:175811375
MLPH	120.706	72.3115	-0.7371	0.0351	DOWN	No	No	1	MLPH_exon_chr2:238462208	1	1	0	NA	1	1	1	1	NA	MLPH_exon_chr2:238462208
ANXA3	417.034	192.96	-1.1095	0.0352	DOWN	No	No	1	ANXA3_exon_chr4:79531209	1	1	0	NA	4	0.493	0.4717	-0.0213	NA	ANXA3_exon_chr4:79531209
TCF25	120.76	78.0372	-0.6307	0.0353	DOWN	No	No	1	TCF25_exon_chr16:89977487	1	1	0	NA	1	1	1	1	NA	TCF25_exon_chr16:89977487
SHB	55.4432	22.0558	-1.3362	0.0353	DOWN	No	No	1	SHB_exon_chr9:37920001	1	1	0	NA	3	0.9303	0.8705	-0.0598	NA	SHB_exon_chr9:37920001
CNTD2	34.6677	15.7408	-1.1545	0.0354	DOWN	No	No	1	CNTD2_exon_chr19:40729210	1	1	0	NA	1	1	1	1	NA	CNTD2_exon_chr19:40729210
SH3BP1	59.3881	32.0226	-0.9	0.0356	DOWN	No	No	1	SH3BP1_exon_chr22:38051278	1	1	0	NA	2	0.2199	0.2453	0.0254	NA	SH3BP1_exon_chr22:38051278
AGRN	91.3577	47.8483	-0.9406	0.0361	DOWN	No	No	1	AGRN_exon_chr1:990203	1	1	0	NA	1	1	1	1	NA	AGRN_exon_chr1:990203
SMIM26	108.529	69.3777	-0.6493	0.0362	DOWN	No	No	1	SMIM26_exon_chr20:18549879	1	1	0	NA	1	1	1	1	NA	SMIM26_exon_chr20:18549879
NCBP2-AS1	54.0677	29.2242	-0.8938	0.0363	DOWN	No	Yes	1	NCBP2-AS1_exon_chr3:196669263	1	1	0	NA	2	0.8385	0.6436	-0.1949	Shortening	NCBP2-AS1_exon_chr3:196669263
PRMT6	20.9794	5.4831	-1.9327	0.0364	DOWN	No	Yes	1	PRMT6_exon_chr1:107599295	1	1	0	NA	2	NA	NA	NA	Shortening	PRMT6_exon_chr1:107599295
SIMC1	93.9275	53.5598	-0.8107	0.0369	DOWN	No	No	1	SIMC1_exon_chr5:175772185	1	1	0	NA	4	0.85	0.7528	-0.0972	NA	SIMC1_exon_chr5:175772185
MESP1	63.8461	33.017	-0.9424	0.0369	DOWN	No	No	1	MESP1_exon_chr15:90293458	1	1	0	NA	1	1	1	1	NA	MESP1_exon_chr15:90293458
LONP1	165.367	108.714	-0.6141	0.0375	DOWN	No	No	1	LONP1_exon_chr19:5692219	1	1	0	NA	1	1	1	1	NA	LONP1_exon_chr19:5692219
RRP1B	253.74	150.535	-0.7503	0.0376	DOWN	No	Yes	3	RRP1B_exon_chr21:45106684_x000D_ RRP1B_exon_chr21:45107396_x000D_ RRP1B_exon_chr21:45113070	0.1331_x000D_ 0.0811_x000D_ 0.7858	0.1113_x000D_ 0.1024_x000D_ 0.7863	-0.0218_x000D_ 0.0213_x000D_ 0.0005	NA_x000D_ NA_x000D_ NA	3_x000D_ 1_x000D_ 1	0.9676_x000D_ 1.0_x000D_ 1.0	0.5279_x000D_ 1.0_x000D_ 1.0	-0.4398_x000D_ 1.0_x000D_ 1.0	Shortening_x000D_ NA_x000D_ NA	RRP1B_exon_chr21:45106684	RRP1B_exon_chr21:45107396	RRP1B_exon_chr21:45113070
OR51B5	177.742	118.168	-0.5875	0.0377	DOWN	No	Yes	1	OR51B5_exon_chr11:5362592	1	1	0	NA	4	0.7071	0.3069	-0.4001	Shortening	OR51B5_exon_chr11:5362592
DDX56	179.093	118.934	-0.587	0.0379	DOWN	No	No	1	DDX56_exon_chr7:44605678	1	1	0	NA	1	1	1	1	NA	DDX56_exon_chr7:44605678
WDR31	44.098	17.0447	-1.3872	0.0379	DOWN	No	No	1	WDR31_exon_chr9:116079189	1	1	0	NA	1	1	1	1	NA	WDR31_exon_chr9:116079189
TNFAIP1	119.283	74.2805	-0.6879	0.0383	DOWN	No	Yes	1	TNFAIP1_exon_chr17:26671389	1	1	0	NA	3	0.9464	0.6699	-0.2765	Shortening	TNFAIP1_exon_chr17:26671389
STRADB	42.0315	19.7949	-1.0799	0.0383	DOWN	No	Yes	1	STRADB_exon_chr2:202344730	1	1	0	NA	2	0.7552	0.5114	-0.2438	Shortening	STRADB_exon_chr2:202344730
SEMA4C	45.1497	21.3715	-1.0987	0.0388	DOWN	No	No	1	SEMA4C_exon_chr2:97527192	1	1	0	NA	1	1	1	1	NA	SEMA4C_exon_chr2:97527192
SLC12A7	49.3898	22.547	-1.1299	0.0389	DOWN	No	No	1	SLC12A7_exon_chr5:1052566	1	1	0	NA	1	1	1	1	NA	SLC12A7_exon_chr5:1052566
HIRA	124.308	71.513	-0.8147	0.0391	DOWN	Yes	No	2	HIRA_exon_chr22:19319079_x000D_ HIRA_exon_chr22:19379737	0.9629_x000D_ 0.0371	0.8602_x000D_ 0.1398	-0.1027_x000D_ 0.1027	Down_x000D_ NA	1_x000D_ 1	1.0_x000D_ 1.0	1.0_x000D_ 1.0	1.0_x000D_ 1.0	NA_x000D_ NA	HIRA_exon_chr22:19319079	HIRA_exon_chr22:19379737
[truncated: 12,712 more rows]
[truncated: 3 more columns]

## Sheet: HCT116-NT_vs_116dDI-NT
Gene Name	Mean Counts Cond1	Mean Counts Cond2	Fold Change	pAdj	DE Result	Any Splicing APA?	Any Tandem APA?	#Exons with a PAC	Exon Names	Exon fraction Cond1	Exon fraction Cond2	Exon Fraction Change	Exon Results_x000D_ (NA = Not significant)	#PACs per Exon	PDU per Exon Cond1	PDU per Exon Cond2	delta-PDUI per Exon	DPAC Result	Links to USCS Gene Browser (one link per cell):
[truncated: 13,233 more rows]
[truncated: 1 more columns]

[truncated: 1 more sheets: HCT116-CFIm25_vs_116dDI-CFIm25]
